# Supplementary material for: Genomic Analysis Unveils the Pervasiveness and Diversity of Prophages Infecting Erwinia Species
Source: MDPI journal article supplement (doi:10.3390/pathogens12010044), 2022-12-27
Supplement: s1 [file s1]

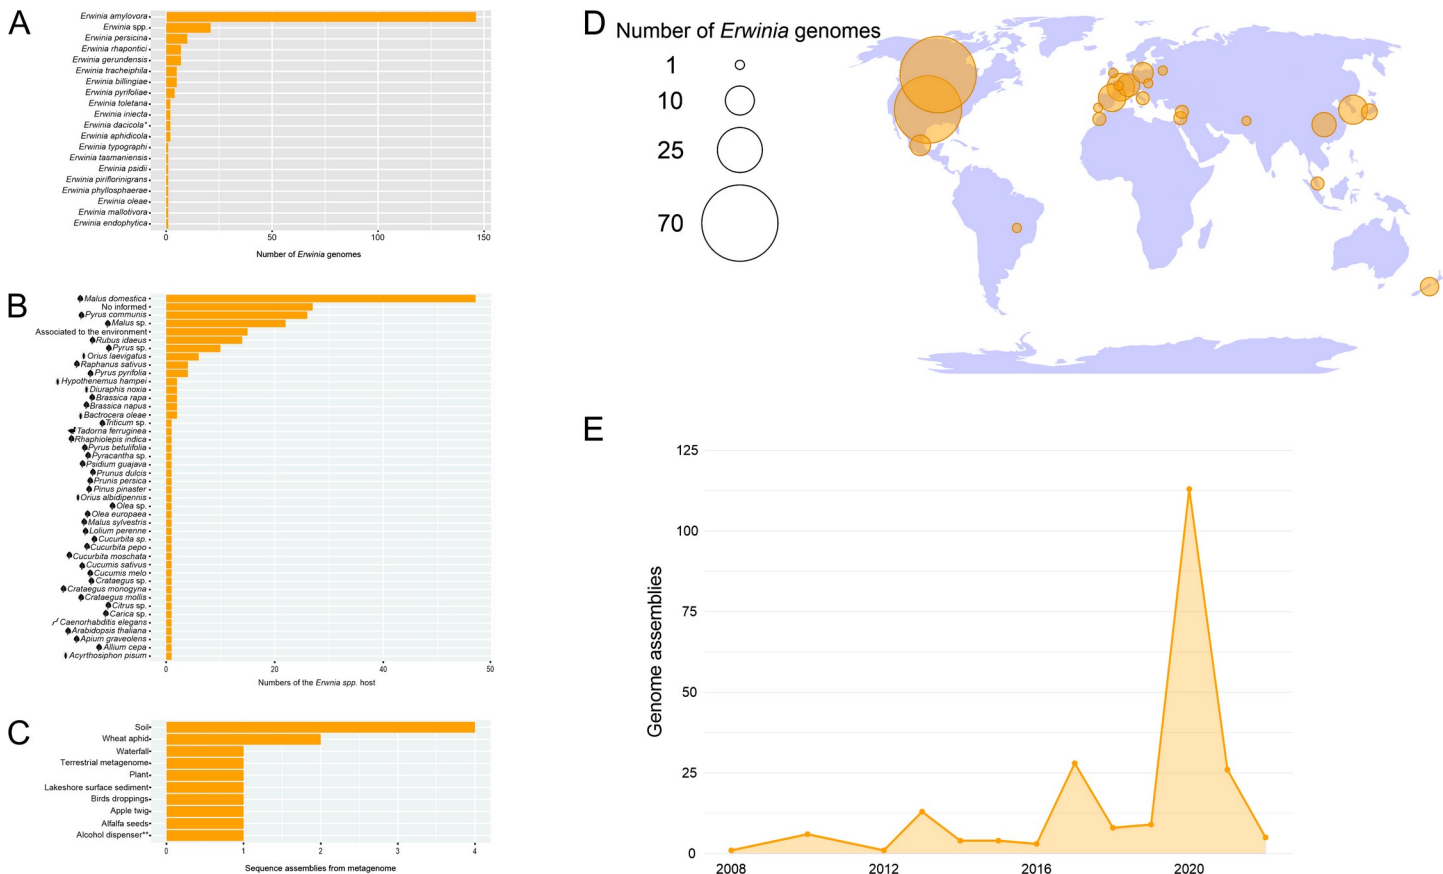

Figure S1. Statistics of the *Erwinia* spp. data set used in this study. (A) Distribution of genome assemblies by species. (B) Distribution of *Erwinia* hosts. (C) Number of *Erwinia* spp. genomes obtained from environmental samples. (D) Distribution *Erwinia* spp. genomes by geographical location. (E) Number of genome assemblies deposited in GenBank by year.
