# Supplementary material for: Genomic Analysis Unveils the Pervasiveness and Diversity of Prophages Infecting Erwinia Species
Source: MDPI journal article supplement (doi:10.3390/pathogens12010044), 2022-12-27
Supplement: s1 [file s1]

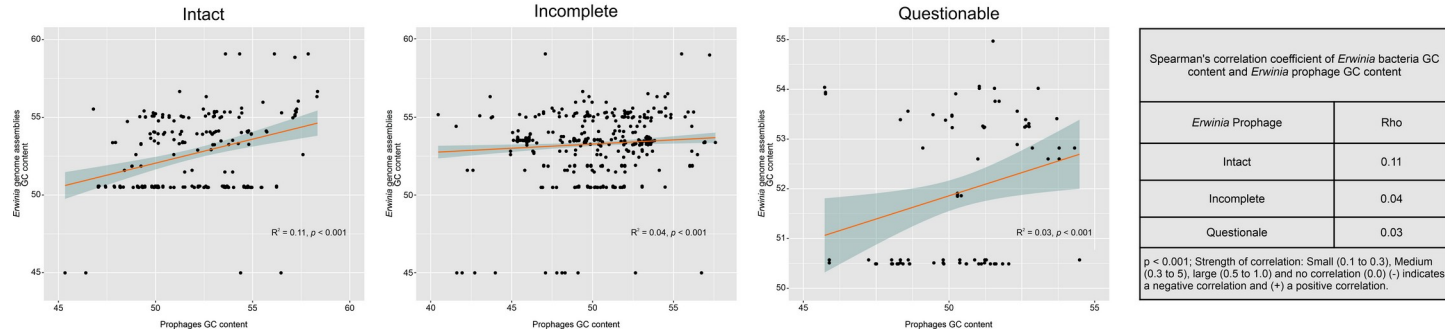

Figure S2. Comparison of the GC content of prophages and their hosts. The GC content showed weak correlation (Spearman's coefficient) and the regression models poorly explained the observed data (low R-squared values).
