# Supplementary material for: Genomic Analysis Unveils the Pervasiveness and Diversity of Prophages Infecting Erwinia Species
Source: Pathogens. 2022 Dec 27;12(1):44. doi: 10.3390/pathogens12010044 (PMC9866893; doi:10.3390/pathogens12010044)
Supplement: Supplementary file 1 [file pathogens-12-00044-s001.zip]

Archive with 13 entries (13 files):
- Figure S1.pdf
- Figure S2.pdf
- Table_S1 - tabela_genome_info_profagos_erwinia_problematicos.xlsx
- Table_S10 - tabela_genome_info_profagos_erwinia.xlsx
- Table_S11 - tabela_stitles_espacadores_crispr.xlsx
- Table_S2 - tabela_profagos_erwinia.xlsx
- Table_S3 - tabela_suplementar_saida_vcontact2.xlsx
- Table_S4 - prophagos_classificados_vcontact2_vpf-class.xlsx
- Table_S5 - tabela_suplementar_saida_vcontact2_intactos_nao_classificados.xlsx
- Table_S6 - suplementar_viridic_clusters.xlsx
- Table_S7 - anteriromente_tabela_1.xlsx
- Table_S8 - tabela_suplementar_dados_heatmap_fagos_phaster_vs_erwinia.completeness.xlsx
- Table_S9 - brex_systems.xlsx
