# Supplementary material for: Genomic Analysis Unveils the Pervasiveness and Diversity of Prophages Infecting Erwinia Species
Source: Pathogens. 2022 Dec 27;12(1):44. doi: 10.3390/pathogens12010044 (PMC9866893; doi:10.3390/pathogens12010044)
Supplement: Supplementary file 1 [file pathogens-12-00044-s001.zip › Table_S1 - tabela_genome_info_profagos_erwinia_problematicos.xlsx]

## Sheet: tabela_genome_info_profagos_erw
Table S1. Defective Erwinia prophages sequences near bacterial contig edges and having less than 20 kb
ID assembly	Bacteria	%GC_bacteria	#prophage	completeness (PHASTER)	prophage size (kb)	%GC_prophage	ID contig	Prophage coordinates	contig size (bp)
GCA_001756855.1	Erwinia_dacicola_IL	52.82	14	incomplete	10.1	52.23	MAYS010006011_Erwinia_dacicola_strain_IL_contig_92	1-10152	10152
GCA_000404125.1	Erwinia_tracheiphila_PSU_1	44.99	22	incomplete	16.2	56.73	KE1363261_tracheiphila_PSU_1_genomic_scaffold_scaffold00019	1-16296	22958
GCA_000336255.1	Erwinia_toletana_DAPP_PG_735	52.89	3	questionable	17.9	43.79	KB3728091_toletana_DAPP_PG_735_genomic_scaffold_scf_2378_621	1-17944	17973
GCA_003058285.2	Erwinia_dacicola_Oroville	52.6	12	questionable	18.2	50.99	LJAM020000131_Erwinia_dacicola_strain_Oroville_edaccontig9_1	1-18207	18412
GCA_012367325.1	Erwinia_amylovora_Ea3_97	53.23	3	incomplete	13.1	51.93	JAAEVM0100000091_amylovora_strain_Ea3_97_Ea_3_97_contig_9	104063-117258	117876
GCA_012367365.1	Erwinia_amylovora_Ea2_97	53.24	1	incomplete	13.1	51.93	JAAEVQ0100000011_amylovora_strain_Ea2_97_Ea_2_97_contig_1	104261-117456	118115
GCA_016624545.1	Erwinia_sp_S38	55.08	9	incomplete	4.6	49.74	JACVTS0100000511_sp_S38_NODE_51_length_5411_cov_21337500	11-4612	5411
GCA_918698235.1	Erwinia_aphidicola_isolate_Bi13	56.33	4	incomplete	6	49.78	CAKKMT0100000281_aphidicola_isolate_Bi13_genome_assembly	11509-17516	18311
GCA_003058285.2	Erwinia_dacicola_Oroville	52.6	5	incomplete	2.5	44.93	LJAM020002811_Erwinia_dacicola_strain_Oroville_edaccontig273_1	125-2657	3065
GCA_012371665.1	Erwinia_amylovora_Ea6_96	53.26	2	incomplete	9.7	52.57	JAAEVB0100000331_amylovora_strain_Ea6_96_Ea_6_96_contig_33	139-9858	115663
GCA_012367085.1	Erwinia_amylovora_Ea8_96	53.25	3	incomplete	9.7	52.57	JAAEUY0100000051_amylovora_strain_Ea8_96_Ea_8_96_contig_5	140-9859	116983
GCA_012371815.1	Erwinia_amylovora_Ea04_03	53.31	2	incomplete	9.7	52.6	JAAEWE0100000171_amylovora_strain_Ea04_03_Ea_04_03_contig_17	140-9860	116486
GCA_014838835.1	Erwinia_persicina_CFBP8795_CFBP879501	55.34	9	incomplete	9.9	54.24	JACYMQ0100000101_persicina_strain_CFBP8795_CFBP879510	143521-153445	154315
GCA_012371815.1	Erwinia_amylovora_Ea04_03	53.31	3	questionable	11.3	52.74	JAAEWE0100000271_amylovora_strain_Ea04_03_Ea_04_03_contig_27	145586-156962	157044
GCA_012371885.1	Erwinia_amylovora_3446_1	53.35	2	incomplete	15.2	49.57	JAAEWU0100000201_amylovora_strain_3446_1_Ea_3446_1_contig_20	152-15365	123236
GCA_009295515.1	Erwinia_endophytica_A41C3	51.59	5	incomplete	9.3	48.44	RQVV010000241_endophytica_strain_A41C3_Seq24	169235-178604	178757
GCA_918698235.1	Erwinia_aphidicola_isolate_Bi13	56.33	5	incomplete	10.5	54.48	CAKKMT0100000311_aphidicola_isolate_Bi13_genome_assembly	2-10538	10690
GCA_001756855.1	Erwinia_dacicola_IL	52.82	13	questionable	4	52.86	MAYS010006001_Erwinia_dacicola_strain_IL_contig_91	2-4057	6640
GCA_012367085.1	Erwinia_amylovora_Ea8_96	53.25	4	incomplete	10.3	51.02	JAAEUY0100000501_amylovora_strain_Ea8_96_Ea_8_96_contig_50	215-10607	33355
GCA_001756855.1	Erwinia_dacicola_IL	52.82	3	incomplete	9.3	47.97	MAYS010001341_Erwinia_dacicola_strain_IL_contig_219	2183-11553	11984
GCA_003058285.2	Erwinia_dacicola_Oroville	52.6	8	incomplete	8.4	50.5	LJAM020000481_Erwinia_dacicola_strain_Oroville_edaccontig43_1	22-8503	10704
GCA_000404125.1	Erwinia_tracheiphila_PSU_1	44.99	14	incomplete	4.7	52.65	KE1363131_tracheiphila_PSU_1_genomic_scaffold_scaffold00006	224308-229019	229277
GCA_012371665.1	Erwinia_amylovora_Ea6_96	53.26	3	incomplete	10.3	51.02	JAAEVB0100000381_amylovora_strain_Ea6_96_Ea_6_96_contig_38	22760-33152	33747
GCA_012367675.1	Erwinia_amylovora_CFBP_7131	53.5	1	incomplete	15.2	49.63	JAAEWK0100000111_amylovora_strain_CFBP_7131_Ea_CFBP7131_contig_11	232-15499	19567
GCA_002732335.1	Erwinia_amylovora_CA3R	53.41	1	incomplete	15.2	49.58	NQKC010000491_amylovora_strain_CA3R_NODE_10_length_123727_cov_505689	259-15472	123727
GCA_004364855.1	Erwinia_rhapontici_BIGb0435_Ga0304803	54.09	3	incomplete	13.8	51.92	SOAQ010000061_rhapontici_strain_BIGb0435_Ga0304803_106	287-14156	296469
GCA_002752165.1	Erwinia_sp_OLFS4	51.86	9	incomplete	2.9	46.98	MOMB010000391_sp_OLFS4_NODE_73_length_2967_cov_141151_ID_145	3-2965	2967
GCA_002752075.1	Erwinia_sp_OLTSP20	51.91	1	incomplete	2.9	46.98	MOMA010001101_sp_OLTSP20_NODE_101_length_2967_cov_455754_ID_201	3-2965	2967
GCA_001756855.1	Erwinia_dacicola_IL	52.82	1	incomplete	4.8	53.7	MAYS010000441_Erwinia_dacicola_strain_IL_contig_138	3-4825	5026
GCA_020882215.1	Erwinia_amylovora_1_2	53.48	3	incomplete	6.4	53.36	CP0636961_amylovora_strain_1_2_plasmid_pEa_IncX	30-6528	43627
GCA_009295515.1	Erwinia_endophytica_A41C3	51.59	1	incomplete	4.8	42.61	RQVV010000011_endophytica_strain_A41C3_Seq1	30574-35405	35407
GCA_012371775.1	Erwinia_amylovora_Ea1_00	53.49	4	incomplete	14	49.02	JAAEWD0100000371_amylovora_strain_Ea1_00_Ea1_00_contig_37	35210-49263	50240
GCA_900068895.1	Erwinia_sp_ErVv1_Ervv1fasta	54.42	5	incomplete	13	53.21	CDPK010000161_sp_ErVv1_genome_assembly_Ervv1fasta	363-13396	91206
GCA_001756855.1	Erwinia_dacicola_IL	52.82	12	incomplete	2.5	44.93	MAYS010004011_Erwinia_dacicola_strain_IL_contig_46	402-2934	3637
GCA_003058285.2	Erwinia_dacicola_Oroville	52.6	3	incomplete	14.3	56.48	LJAM020000231_Erwinia_dacicola_strain_Oroville_edaccontig19_1	408-14733	14974
GCA_918698235.1	Erwinia_aphidicola_isolate_Bi13	56.33	6	incomplete	4.9	43.67	CAKKMT0100000341_aphidicola_isolate_Bi13_genome_assembly	460-5444	5619
GCA_005233475.1	Erwinia_persicina_CFBP1351100_0	55.1	7	incomplete	11.4	43.03	QGAC010000101_persicina_strain_CFBP13511_contig_100_9	470-11960	183772
GCA_012367945.1	Erwinia_amylovora_1400_2	53.53	2	incomplete	11.3	48.01	JAAEXC0100000561_amylovora_strain_1400_2_Ea_1400_2_contig_56	47157-58526	58858
GCA_001756855.1	Erwinia_dacicola_IL	52.82	7	incomplete	7.3	46.31	MAYS010002171_Erwinia_dacicola_strain_IL_contig_294	49-7368	10894
GCA_001756855.1	Erwinia_dacicola_IL	52.82	10	incomplete	4.3	51.59	MAYS010003101_Erwinia_dacicola_strain_IL_contig_378	500-4804	4805
GCA_000773975.1	Erwinia_typographi_M043b	54.97	10	incomplete	7	52.45	JRUQ010000781_typographi_strain_M043b_Contig78	508-7561	20586
GCA_000404125.1	Erwinia_tracheiphila_PSU_1	44.99	8	incomplete	15.4	48.3	KE1363101_tracheiphila_PSU_1_genomic_scaffold_scaffold00003	514507-529992	530286
GCA_014357465.1	Erwinia_persicina_DOAB1061_DOAB1061	55.29	2	incomplete	17.7	50.75	JACONS0100000121_persicina_strain_DOAB1061_DOAB1061_contig_12	51989-69774	70205
GCA_002752165.1	Erwinia_sp_OLFS4	51.86	1	incomplete	18.3	51.8	MOMB010000071_sp_OLFS4_NODE_16_length_71130_cov_495321_ID_31	52826-71128	71130
GCA_002752075.1	Erwinia_sp_OLTSP20	51.91	2	incomplete	18.3	51.8	MOMA010000011_sp_OLTSP20_NODE_15_length_71130_cov_16194_ID_29	52826-71128	71130
GCA_012368055.1	Erwinia_amylovora_1686	53.52	2	incomplete	17.9	50.11	JAAEXK0100000081_amylovora_strain_1686_Ea_1686_contig_8	53-17999	75815
GCA_012368325.1	Erwinia_amylovora_1279	53.52	1	incomplete	8	46.3	JAAEXY0100000311_amylovora_strain_1279_Ea_1279_contig_31	538-8580	131438
GCA_009295515.1	Erwinia_endophytica_A41C3	51.59	3	incomplete	4.9	50.97	RQVV010000131_endophytica_strain_A41C3_Seq13	539-5504	87289
GCA_012367585.1	Erwinia_amylovora_Ea02_03	53.3	2	incomplete	10.8	52.67	JAAEWG0100000051_amylovora_strain_Ea02_03_Ea_02_03_contig_5	56-10880	114934
GCA_009295515.1	Erwinia_endophytica_A41C3	51.59	9	incomplete	4.1	54.12	RQVV010000571_endophytica_strain_A41C3_Seq58	585-4778	318363
GCA_012367175.1	Erwinia_amylovora_Ea4_96	53.24	2	incomplete	13.1	51.93	JAAEVG0100000311_amylovora_strain_Ea4_96_Ea_4_96_contig_31	624-13819	81128
GCA_000367665.2	Erwinia_amylovora_Ea644	53.26	1	questionable	18.3	51.16	CAPD010000131_amylovora_Ea644_WGS_project_CAPD00000000_data	634189-652525	652767
GCA_000404125.1	Erwinia_tracheiphila_PSU_1	44.99	7	incomplete	18.8	48.11	KE1363091_tracheiphila_PSU_1_genomic_scaffold_scaffold00002	646792-665610	665610
GCA_000404125.1	Erwinia_tracheiphila_PSU_1	44.99	21	incomplete	19.8	47.09	KE1363201_tracheiphila_PSU_1_genomic_scaffold_scaffold00013	64971-84843	84879
GCA_002752595.1	Erwinia_sp_OAMSP11	51.86	9	incomplete	7.6	48.59	MTCI010000551_sp_OAMSP11_NODE_63_length_8299_cov_927655_ID_125	657-8299	8299
GCA_012367425.1	Erwinia_amylovora_Ea1_98	53.39	1	incomplete	17	53.33	JAAEVT0100000171_amylovora_strain_Ea1_98_Ea_1_98_contig_17	66-17103	81084
GCA_003058285.2	Erwinia_dacicola_Oroville	52.6	2	incomplete	4.5	48.93	LJAM020001511_Erwinia_dacicola_strain_Oroville_edaccontig145_1	66-4637	5336
GCA_005233475.1	Erwinia_persicina_CFBP1351100_0	55.1	4	questionable	14.2	41.62	QGAC010000251_persicina_strain_CFBP13511_contig_100_25	756-14993	67346
GCA_001756855.1	Erwinia_dacicola_IL	52.82	8	incomplete	5.8	52.19	MAYS010002961_Erwinia_dacicola_strain_IL_contig_365	8-5830	5830
GCA_001756855.1	Erwinia_dacicola_IL	52.82	6	incomplete	5.3	48.37	MAYS010001951_Erwinia_dacicola_strain_IL_contig_274	80-5411	5413
GCA_016624545.1	Erwinia_sp_S38	55.08	3	questionable	16.1	48.33	JACVTS0100000241_sp_S38_NODE_24_length_98615_cov_20064709	81768-97927	98615
GCA_000773975.1	Erwinia_typographi_M043b	54.97	8	incomplete	6.4	43.74	JRUQ010000671_typographi_strain_M043b_Contig67	8632-15112	15725
GCA_012367455.1	Erwinia_amylovora_Ea1_97	53.23	2	incomplete	18.4	52.48	JAAEVU0100000301_amylovora_strain_Ea1_97_Ea1_97_contig_30	865-19348	80530
GCA_003058285.2	Erwinia_dacicola_Oroville	52.6	1	incomplete	5.2	50.27	LJAM020001291_Erwinia_dacicola_strain_Oroville_edaccontig123_1	99-5300	5712
GCA_002752165.1	Erwinia_sp_OLFS4	51.86	8	incomplete	12.1	47.25	MOMB010000361_sp_OLFS4_NODE_56_length_13171_cov_10146_ID_111	994-13140	13171
GCA_002751995.1	Erwinia_sp_OLCASP19	51.86	8	incomplete	12.2	47.25	MNKW010001121_sp_OLCASP19_NODE_59_length_13247_cov_492659_ID_117	994-13216	13247
GCA_002752015.1	Erwinia_sp_OLMTSP26	51.85	8	incomplete	12.2	47.25	MNKX010001351_sp_OLMTSP26_NODE_58_length_13247_cov_663991_ID_115	994-13216	13247
