# Supplementary material for: Genomic Analysis Unveils the Pervasiveness and Diversity of Prophages Infecting Erwinia Species
Source: Pathogens. 2022 Dec 27;12(1):44. doi: 10.3390/pathogens12010044 (PMC9866893; doi:10.3390/pathogens12010044)
Supplement: Supplementary file 1 [file pathogens-12-00044-s001.zip › Table_S2 - tabela_profagos_erwinia.xlsx]

## Sheet: tabela_profagos_erwinia
Table S2. Distribution of Erwinia prophages according to sequence complenetess (PHASTER) in each Erwinia spp. genome assembly.
ID assembly	Bacteria	Intact.prophages	Incomplete.prophages	Questionable.prophages
GCA_021365465.1	Erwinia_tracheiphila_BHKY	24	10	6
GCA_021365505.1	Erwinia_tracheiphila_BuffGH	24	6	11
GCA_021365535.1	Erwinia_tracheiphila_MDCuke	17	11	12
GCA_021365485.1	Erwinia_tracheiphila_SCR3	17	13	11
GCA_009846845.1	Erwinia_rhapontici_CGMCC1.6978	5	3	1
GCA_012271765.1	Erwinia_rhapontici_H1	5	0	1
GCA_017875455.1	Erwinia_rhapontici_WS3235	5	1	2
GCA_016624545.1	Erwinia_sp._S38	5	4	1
GCA_001422605.1	Erwinia_sp._Leaf53	4	2	0
GCA_000404125.1	Erwinia_tracheiphila_PSU-1	4	15	3
GCA_002415165.1	Erwinia_billingiae_UBA5038	3	1	0
GCA_003058285.2	Erwinia_dacicola_Oroville	3	6	3
GCA_014838835.1	Erwinia_persicina_CFBP8795	3	6	2
GCA_019844095.1	Erwinia_persicina_Cp2	3	2	1
GCA_014357465.1	Erwinia_persicina_DOAB1061	3	2	0
GCA_003846135.1	Erwinia_psidii_IBSBF_435	3	4	0
GCA_004364855.1	Erwinia_rhapontici_BIGb0435	3	2	0
GCA_013074405.1	Erwinia_sp._JH02	3	3	3
GCA_000773975.1	Erwinia_typographi_M043b	3	7	1
GCA_012367615.1	Erwinia_amylovora_E2006P	2	2	1
GCA_918698235.1	Erwinia_aphidicola_Bi13	2	4	0
GCA_014773485.1	Erwinia_aphidicola_JCM_21238	2	1	0
GCA_000196615.1	Erwinia_billingiae_Eb661	2	4	2
GCA_017168115.1	Erwinia_billingiae_PBb	2	4	0
GCA_009295515.1	Erwinia_endophytica_A41C3	2	8	0
GCA_014354075.1	Erwinia_gerundensis_Eg31-2	2	2	1
GCA_003485445.1	Erwinia_persicina_B64	2	3	0
GCA_005233475.1	Erwinia_persicina_CFBP13511	2	3	2
GCA_001571305.1	Erwinia_persicina_NBRC_102418	2	2	0
GCA_000026985.1	Erwinia_pyrifoliae_DSM_12163	2	5	0
GCA_000027265.1	Erwinia_pyrifoliae_Ep1/96	2	5	0
GCA_002952315.1	Erwinia_pyrifoliae_EpK1/15	2	4	1
GCA_020683125.1	Erwinia_rhapontici_BY21311	2	1	0
GCA_018326325.1	Erwinia_rhapontici_MAFF_311154	2	3	1
GCA_000745075.1	Erwinia_sp._9145	2	2	0
GCA_018141005.1	Erwinia_sp._E602	2	0	1
GCA_004551645.1	Erwinia_sp._QL-Z3	2	3	1
GCA_016624745.1	Erwinia_sp._S43	2	1	0
GCA_012367585.1	Erwinia_amylovora_Ea02-03	1	1	0
GCA_012367595.1	Erwinia_amylovora_Ea03-03	1	1	0
GCA_012371815.1	Erwinia_amylovora_Ea04-03	1	1	1
GCA_012367475.1	Erwinia_amylovora_Ea1-95	1	1	0
GCA_012367535.1	Erwinia_amylovora_Ea123-5-51	1	0	0
GCA_012367365.1	Erwinia_amylovora_Ea2-97	1	1	1
GCA_012367325.1	Erwinia_amylovora_Ea3-97	1	1	1
GCA_012367175.1	Erwinia_amylovora_Ea4-96	1	1	1
GCA_012371665.1	Erwinia_amylovora_Ea6-96	1	3	1
GCA_012371615.1	Erwinia_amylovora_Ea7-96	1	1	0
GCA_012367085.1	Erwinia_amylovora_Ea8-96	1	3	1
GCA_008728215.1	Erwinia_billingiae_TH88	1	4	0
GCA_001517405.1	Erwinia_gerundensis_E_g_EM595	1	3	0
GCA_000770305.1	Erwinia_oleae_DAPP-PG531	1	1	0
GCA_014839305.1	Erwinia_persicina_CFBP13732	1	2	1
GCA_014839215.1	Erwinia_persicina_CFBP8767	1	2	1
GCA_014838825.1	Erwinia_persicina_CFBP8797	1	1	0
GCA_014839105.1	Erwinia_persicina_CFBP8803	1	3	0
GCA_001050515.1	Erwinia_piriflorinigrans_CFBP_5888	1	2	0
GCA_020428355.1	Erwinia_pyrifoliae_YKB12328	1	5	0
GCA_018409035.1	Erwinia_rhapontici_MAFF_311153	1	2	0
GCA_003937915.1	Erwinia_sp._198	1	4	0
GCA_000165815.1	Erwinia_sp._Ejp617	1	3	0
GCA_002752595.1	Erwinia_sp._OAMSP11	1	7	1
GCA_002751995.1	Erwinia_sp._OLCASP19	1	6	1
GCA_002752165.1	Erwinia_sp._OLFS4	1	7	1
GCA_002752015.1	Erwinia_sp._OLMTSP26	1	6	1
GCA_000336255.1	Erwinia_toletana_DAPP-PG_735	1	2	2
GCA_017875465.1	Erwinia_toletana_WS4403	1	3	2
GCA_000367605.2	Erwinia_amylovora_01SFR-BO	0	2	0
GCA_020882215.1	Erwinia_amylovora_1-2	0	3	0
GCA_020546585.1	Erwinia_amylovora_11-7	0	4	0
GCA_012368325.1	Erwinia_amylovora_1279	0	3	0
GCA_012368345.1	Erwinia_amylovora_1280	0	2	0
GCA_012367905.1	Erwinia_amylovora_1400-1	0	3	0
GCA_012367945.1	Erwinia_amylovora_1400-2	0	2	0
GCA_012368315.1	Erwinia_amylovora_1476	0	3	0
GCA_012367885.1	Erwinia_amylovora_1477	0	2	0
GCA_012367935.1	Erwinia_amylovora_1478-2	0	1	0
GCA_012367875.1	Erwinia_amylovora_1480-3	0	3	0
GCA_012368375.1	Erwinia_amylovora_1482	0	2	0
GCA_012368265.1	Erwinia_amylovora_1486	0	3	0
GCA_012368295.1	Erwinia_amylovora_1581	0	3	0
GCA_012368255.1	Erwinia_amylovora_1598	0	2	0
GCA_012368165.1	Erwinia_amylovora_1602	0	2	0
GCA_012368205.1	Erwinia_amylovora_1609	0	2	0
GCA_012367815.1	Erwinia_amylovora_1611_(BCEa29)	0	1	0
GCA_012368185.1	Erwinia_amylovora_1612	0	2	0
GCA_012368155.1	Erwinia_amylovora_1617	0	1	0
GCA_012368175.1	Erwinia_amylovora_1619	0	3	0
GCA_012368135.1	Erwinia_amylovora_1668	0	3	0
GCA_012368085.1	Erwinia_amylovora_1680	0	2	0
GCA_012368055.1	Erwinia_amylovora_1686	0	3	0
GCA_017161545.1	Erwinia_amylovora_17-2187	0	2	0
GCA_012368035.1	Erwinia_amylovora_20060013	0	2	0
GCA_012368015.1	Erwinia_amylovora_20070126	0	2	0
GCA_012367995.1	Erwinia_amylovora_20070245	0	3	0
GCA_012367975.1	Erwinia_amylovora_20070270	0	3	0
GCA_012367845.1	Erwinia_amylovora_214/07	0	2	0
GCA_012367795.1	Erwinia_amylovora_241/07	0	3	0
GCA_012371915.1	Erwinia_amylovora_245/07	0	2	0
GCA_012368075.1	Erwinia_amylovora_2558	0	2	0
GCA_012368065.1	Erwinia_amylovora_2570	0	3	0
GCA_020546605.1	Erwinia_amylovora_32-10	0	4	0
GCA_022811485.1	Erwinia_amylovora_33-1	0	4	0
GCA_012371885.1	Erwinia_amylovora_3446-1	0	4	0
GCA_012367805.1	Erwinia_amylovora_3477-1	0	2	0
GCA_012371855.1	Erwinia_amylovora_3515-1	0	2	0
GCA_012371865.1	Erwinia_amylovora_39-I-II	0	3	0
GCA_012367775.1	Erwinia_amylovora_39-M1-II	0	2	0
GCA_012371765.1	Erwinia_amylovora_46-4-2	0	3	0
GCA_020544325.1	Erwinia_amylovora_7-3	0	2	0
GCA_000240705.2	Erwinia_amylovora_ACW56400	0	2	0
GCA_017161565.1	Erwinia_amylovora_ATCC_15580	0	2	0
GCA_000027205.1	Erwinia_amylovora_ATCC_49946	0	3	0
GCA_012367755.1	Erwinia_amylovora_BCEa23A	0	2	0
GCA_002732335.1	Erwinia_amylovora_CA3R	0	2	1
GCA_000367625.2	Erwinia_amylovora_CFBP_1232	0	3	0
GCA_012367705.1	Erwinia_amylovora_CFBP_1995	0	2	0
GCA_012367685.1	Erwinia_amylovora_CFBP_2313	0	2	0
GCA_000367585.2	Erwinia_amylovora_CFBP_2585	0	2	0
GCA_012367695.1	Erwinia_amylovora_CFBP_7130	0	2	0
GCA_012367675.1	Erwinia_amylovora_CFBP_7131	0	2	0
GCA_000091565.1	Erwinia_amylovora_CFPB1430	0	2	0
GCA_002732385.1	Erwinia_amylovora_CTBT1-1	0	3	0
GCA_002732205.1	Erwinia_amylovora_CTBT3-1	0	3	0
GCA_002732315.1	Erwinia_amylovora_CTMF03-1	0	3	0
GCA_002732295.1	Erwinia_amylovora_CTST01-1	0	3	0
GCA_002803865.1	Erwinia_amylovora_E-2	0	3	0
GCA_012371795.1	Erwinia_amylovora_E2005A	0	3	0
GCA_012367655.1	Erwinia_amylovora_Ea01-03	0	3	1
GCA_012371775.1	Erwinia_amylovora_Ea1-00	0	3	1
GCA_012367455.1	Erwinia_amylovora_Ea1-97	0	2	1
GCA_012367425.1	Erwinia_amylovora_Ea1-98	0	1	1
GCA_015650045.1	Erwinia_amylovora_Ea1/79Sm	0	2	0
GCA_002732505.1	Erwinia_amylovora_EA110	0	3	0
GCA_012367575.1	Erwinia_amylovora_Ea116-5-29	0	3	0
GCA_016446415.2	Erwinia_amylovora_Ea1189	0	3	0
GCA_012367545.1	Erwinia_amylovora_Ea12	0	1	0
GCA_012367495.1	Erwinia_amylovora_Ea160-3-51	0	2	0
GCA_012371755.1	Erwinia_amylovora_Ea160-4-51	0	3	1
GCA_012367485.1	Erwinia_amylovora_Ea169	0	2	0
GCA_012371695.1	Erwinia_amylovora_Ea17-1-1	0	2	0
GCA_012367415.1	Erwinia_amylovora_Ea2-95	0	2	0
GCA_000367565.2	Erwinia_amylovora_Ea266	0	3	0
GCA_012367375.1	Erwinia_amylovora_Ea29-7	0	3	0
GCA_012367355.1	Erwinia_amylovora_Ea315-1	0	3	0
GCA_003992295.1	Erwinia_amylovora_Ea321	0	3	0
GCA_000367545.2	Erwinia_amylovora_Ea356	0	3	0
GCA_012367305.1	Erwinia_amylovora_Ea367	0	2	0
GCA_012367265.1	Erwinia_amylovora_Ea3a-H1-II	0	3	0
GCA_012367185.1	Erwinia_amylovora_Ea4-97	0	2	0
GCA_012371655.1	Erwinia_amylovora_Ea433	0	3	0
GCA_012367255.1	Erwinia_amylovora_Ea435	0	3	0
GCA_012367195.1	Erwinia_amylovora_Ea440	0	2	0
GCA_012371675.1	Erwinia_amylovora_Ea464	0	2	0
GCA_012367165.1	Erwinia_amylovora_Ea5-97	0	2	0
GCA_012371685.1	Erwinia_amylovora_Ea6-4	0	2	0
GCA_012367125.1	Erwinia_amylovora_Ea6-97	0	2	0
GCA_000367665.2	Erwinia_amylovora_Ea644	0	1	1
GCA_012367155.1	Erwinia_amylovora_Ea650	0	2	0
GCA_012371585.1	Erwinia_amylovora_Ea92-1-1	0	2	0
GCA_012367095.1	Erwinia_amylovora_Ea92-1-2	0	2	0
GCA_012367075.1	Erwinia_amylovora_EaA-11	0	1	0
GCA_012371565.1	Erwinia_amylovora_EaB-110	0	2	0
GCA_012371575.1	Erwinia_amylovora_EaD-7	0	3	0
GCA_012367055.1	Erwinia_amylovora_EaG5	0	3	0
GCA_012371555.1	Erwinia_amylovora_EaIF	0	2	0
GCA_012367015.1	Erwinia_amylovora_EaLevo2	0	2	0
GCA_012980765.1	Erwinia_amylovora_FB-20	0	3	0
GCA_012980845.1	Erwinia_amylovora_FB-207	0	3	0
GCA_012980805.1	Erwinia_amylovora_FB-307	0	3	0
GCA_012980785.1	Erwinia_amylovora_FB-86	0	3	0
GCA_012371505.1	Erwinia_amylovora_Fb-97b	0	2	0
GCA_004023365.1	Erwinia_amylovora_HKN06P1	0	2	0
GCA_012371495.1	Erwinia_amylovora_IH-3-1	0	2	0
GCA_012366985.1	Erwinia_amylovora_IVIA2303	0	2	0
GCA_002732285.1	Erwinia_amylovora_LA092	0	3	0
GCA_012371465.1	Erwinia_amylovora_LA472	0	2	0
GCA_000513415.1	Erwinia_amylovora_LA635	0	3	0
GCA_000513395.1	Erwinia_amylovora_LA636	0	3	0
GCA_000513355.1	Erwinia_amylovora_LA637	0	3	0
GCA_002732175.1	Erwinia_amylovora_MAGFLF_2	0	3	0
GCA_002732485.1	Erwinia_amylovora_MANB02-1	0	3	0
GCA_002732135.1	Erwinia_amylovora_MASHBO	0	4	0
GCA_019967065.1	Erwinia_amylovora_MLI181-18	0	3	0
GCA_019967055.1	Erwinia_amylovora_MLI200-18	0	3	0
GCA_019967115.1	Erwinia_amylovora_MLI217-18	0	3	0
GCA_019967075.1	Erwinia_amylovora_MLI90-17	0	3	0
GCA_002732245.1	Erwinia_amylovora_NHSB01-1	0	3	0
GCA_002732435.1	Erwinia_amylovora_NHWL02-2	0	3	0
GCA_012366995.1	Erwinia_amylovora_O-RG-21	0	2	0
GCA_002732445.1	Erwinia_amylovora_OR1	0	3	0
GCA_002732425.1	Erwinia_amylovora_OR6	0	3	0
GCA_012366965.1	Erwinia_amylovora_P-C-3b	0	2	0
GCA_002732365.1	Erwinia_amylovora_RISTBO01-2	0	3	0
GCA_013375015.1	Erwinia_amylovora_TS3128	0	2	0
GCA_012980825.1	Erwinia_amylovora_TS3238	0	3	0
GCA_000367645.1	Erwinia_amylovora_UPN527	0	2	0
GCA_002732405.1	Erwinia_amylovora_UT5P4	0	3	0
GCA_002732255.1	Erwinia_amylovora_VTBL01-1	0	3	0
GCA_002732125.1	Erwinia_amylovora_VTDMSF02	0	3	0
GCA_002732215.1	Erwinia_amylovora_WSDA87-73	0	3	0
GCA_002980095.1	Erwinia_billingiae_MYb121	0	3	0
GCA_001756855.1	Erwinia_dacicola_IL	0	10	4
GCA_017815635.1	Erwinia_gerundensis_A4	0	2	0
GCA_020342335.1	Erwinia_gerundensis_AR	0	2	0
GCA_014354255.1	Erwinia_gerundensis_Eg13-2	0	2	0
GCA_014354275.1	Erwinia_gerundensis_Eg13-3	0	2	0
GCA_014353715.1	Erwinia_gerundensis_Eg31-5	0	3	0
GCA_001267535.1	Erwinia_iniecta_B120	0	2	0
GCA_001267545.1	Erwinia_iniecta_B149	0	2	0
GCA_000590885.1	Erwinia_mallotivora_BT-MARDI	0	3	0
GCA_019132875.1	Erwinia_phyllosphaerae_CMYE1	0	4	2
GCA_002865965.1	Erwinia_sp._B116	0	1	0
GCA_900068895.1	Erwinia_sp._ErVv1	0	7	0
GCA_009707715.1	Erwinia_sp._J316	0	1	0
GCA_009738185.1	Erwinia_sp._J780	0	2	0
GCA_003751505.1	Erwinia_sp._JUb26	0	2	0
GCA_002752025.1	Erwinia_sp._OLMDSP33	0	6	1
GCA_002752055.1	Erwinia_sp._OLSSP12	0	5	1
GCA_002752075.1	Erwinia_sp._OLTSP20	0	6	1
GCA_000026185.1	Erwinia_tasmaniensis__Et1/99_(DSM_17950)	0	2	1
