# Supplementary material for: Genomic Analysis Unveils the Pervasiveness and Diversity of Prophages Infecting Erwinia Species
Source: Pathogens. 2022 Dec 27;12(1):44. doi: 10.3390/pathogens12010044 (PMC9866893; doi:10.3390/pathogens12010044)
Supplement: Supplementary file 1 [file pathogens-12-00044-s001.zip › Table_S3 - tabela_suplementar_saida_vcontact2.xlsx]

## Sheet: Table_S1
Table S3. The genome_by_genome_overview.csv output file from vConTACT2 including the 939 Erwinia prophage sequences and viral genomes from ProkaryoticViralRefSeq201-Merged database.
Genome	Order	Family	Genus	VC	VC Status	Size	VC Subcluster	VC Subcluster Size	Quality	Adj P-value	Topology Confidence Score	Genera in VC	Families in VC	Orders in VC	Genus Confidence Score
1#Erwinia_amylovora_1400_1	Unassigned	Unassigned	Unassigned	7_0	Clustered	111	VC_7_0	111	0.9935	1.0	0.9935	1	1	1	1.0
1#Erwinia_amylovora_1400_2	Unassigned	Unassigned	Unassigned	1_0	Clustered	2	VC_1_0	2	0.0141	0.95914375	0.0135	1	1	1	1.0
1#Erwinia_amylovora_1476	Unassigned	Unassigned	Unassigned	5_0	Clustered	79	VC_5_0	79	0.9351	1.0	0.9351	1	1	1	1.0
1#Erwinia_amylovora_1477_1	Unassigned	Unassigned	Unassigned	2_0	Clustered	80	VC_2_0	80	0.7197	1.0	0.7197	1	1	1	1.0
1#Erwinia_amylovora_1482	Unassigned	Unassigned	Unassigned	7_0	Clustered	111	VC_7_0	111	0.9935	1.0	0.9935	1	1	1	1.0
1#Erwinia_amylovora_1486	Unassigned	Unassigned	Unassigned	5_0	Clustered	79	VC_5_0	79	0.9351	1.0	0.9351	1	1	1	1.0
1#Erwinia_amylovora_1581	Unassigned	Unassigned	Unassigned	5_0	Clustered	79	VC_5_0	79	0.9351	1.0	0.9351	1	1	1	1.0
1#Erwinia_amylovora_1598	Unassigned	Unassigned	Unassigned	7_0	Clustered	111	VC_7_0	111	0.9935	1.0	0.9935	1	1	1	1.0
1#Erwinia_amylovora_1612	Unassigned	Unassigned	Unassigned	2_0	Clustered	80	VC_2_0	80	0.7197	1.0	0.7197	1	1	1	1.0
1#Erwinia_amylovora_1619	Unassigned	Unassigned	Unassigned	7_0	Clustered	111	VC_7_0	111	0.9935	1.0	0.9935	1	1	1	1.0
1#Erwinia_amylovora_1668	Unassigned	Unassigned	Unassigned	5_0	Clustered	79	VC_5_0	79	0.9351	1.0	0.9351	1	1	1	1.0
1#Erwinia_amylovora_1680	Unassigned	Unassigned	Unassigned	2_0	Clustered	80	VC_2_0	80	0.7197	1.0	0.7197	1	1	1	1.0
1#Erwinia_amylovora_1686	Unassigned	Unassigned	Unassigned	5_0	Clustered	79	VC_5_0	79	0.9351	1.0	0.9351	1	1	1	1.0
1#Erwinia_amylovora_17_2187	Unassigned	Unassigned	Unassigned	5_0	Clustered	79	VC_5_0	79	0.9351	1.0	0.9351	1	1	1	1.0
1#Erwinia_amylovora_1_2	Unassigned	Unassigned	Unassigned	5_0	Clustered	79	VC_5_0	79	0.9351	1.0	0.9351	1	1	1	1.0
1#Erwinia_amylovora_20070126	Unassigned	Unassigned	Unassigned	2_0	Clustered	80	VC_2_0	80	0.7197	1.0	0.7197	1	1	1	1.0
1#Erwinia_amylovora_20070245	Unassigned	Unassigned	Unassigned	7_0	Clustered	111	VC_7_0	111	0.9935	1.0	0.9935	1	1	1	1.0
1#Erwinia_amylovora_20070270	Unassigned	Unassigned	Unassigned	7_0	Clustered	111	VC_7_0	111	0.9935	1.0	0.9935	1	1	1	1.0
1#Erwinia_amylovora_214_07	Unassigned	Unassigned	Unassigned	7_0	Clustered	111	VC_7_0	111	0.9935	1.0	0.9935	1	1	1	1.0
1#Erwinia_amylovora_241_07	Unassigned	Unassigned	Unassigned	5_0	Clustered	79	VC_5_0	79	0.9351	1.0	0.9351	1	1	1	1.0
1#Erwinia_amylovora_245_07	Unassigned	Unassigned	Unassigned	2_0	Clustered	80	VC_2_0	80	0.7197	1.0	0.7197	1	1	1	1.0
1#Erwinia_amylovora_2558	Unassigned	Unassigned	Unassigned	2_0	Clustered	80	VC_2_0	80	0.7197	1.0	0.7197	1	1	1	1.0
1#Erwinia_amylovora_2570	Unassigned	Unassigned	Unassigned	7_0	Clustered	111	VC_7_0	111	0.9935	1.0	0.9935	1	1	1	1.0
1#Erwinia_amylovora_33_1	Unassigned	Unassigned	Unassigned	5_0	Clustered	79	VC_5_0	79	0.9351	1.0	0.9351	1	1	1	1.0
1#Erwinia_amylovora_3477_1	Unassigned	Unassigned	Unassigned	2_0	Clustered	80	VC_2_0	80	0.7197	1.0	0.7197	1	1	1	1.0
1#Erwinia_amylovora_39_I_II	Unassigned	Unassigned	Unassigned	7_0	Clustered	111	VC_7_0	111	0.9935	1.0	0.9935	1	1	1	1.0
1#Erwinia_amylovora_39_M1_II	Unassigned	Unassigned	Unassigned	7_0	Clustered	111	VC_7_0	111	0.9935	1.0	0.9935	1	1	1	1.0
1#Erwinia_amylovora_46_4_2	Unassigned	Unassigned	Unassigned	2_0	Clustered	80	VC_2_0	80	0.7197	1.0	0.7197	1	1	1	1.0
1#Erwinia_amylovora_7_3	Unassigned	Unassigned	Unassigned	5_0	Clustered	79	VC_5_0	79	0.9351	1.0	0.9351	1	1	1	1.0
1#Erwinia_amylovora_ATCC_15580	Unassigned	Unassigned	Unassigned	5_0	Clustered	79	VC_5_0	79	0.9351	1.0	0.9351	1	1	1	1.0
1#Erwinia_amylovora_ATCC_49946	Unassigned	Unassigned	Unassigned	2_0	Clustered	80	VC_2_0	80	0.7197	1.0	0.7197	1	1	1	1.0
1#Erwinia_amylovora_CA3R	Unassigned	Unassigned	Unassigned	2_0	Clustered	80	VC_2_0	80	0.7197	1.0	0.7197	1	1	1	1.0
1#Erwinia_amylovora_CFBP1430	Unassigned	Unassigned	Unassigned	5_0	Clustered	79	VC_5_0	79	0.9351	1.0	0.9351	1	1	1	1.0
1#Erwinia_amylovora_CFBP_1232	Unassigned	Unassigned	Unassigned	7_0	Clustered	111	VC_7_0	111	0.9935	1.0	0.9935	1	1	1	1.0
1#Erwinia_amylovora_CFBP_1995	Unassigned	Unassigned	Unassigned	2_0	Clustered	80	VC_2_0	80	0.7197	1.0	0.7197	1	1	1	1.0
1#Erwinia_amylovora_CFBP_2313	Unassigned	Unassigned	Unassigned	1_0	Clustered	2	VC_1_0	2	0.0141	0.95914375	0.0135	1	1	1	1.0
1#Erwinia_amylovora_CFBP_7130	Unassigned	Unassigned	Unassigned	7_0	Clustered	111	VC_7_0	111	0.9935	1.0	0.9935	1	1	1	1.0
1#Erwinia_amylovora_CFBP_7131	Unassigned	Unassigned	Unassigned	2_0	Clustered	80	VC_2_0	80	0.7197	1.0	0.7197	1	1	1	1.0
1#Erwinia_amylovora_CTBT1_1	Unassigned	Unassigned	Unassigned	2_0	Clustered	80	VC_2_0	80	0.7197	1.0	0.7197	1	1	1	1.0
1#Erwinia_amylovora_CTBT3_1	Unassigned	Unassigned	Unassigned	2_0	Clustered	80	VC_2_0	80	0.7197	1.0	0.7197	1	1	1	1.0
1#Erwinia_amylovora_CTMF03_1	Unassigned	Unassigned	Unassigned	5_0	Clustered	79	VC_5_0	79	0.9351	1.0	0.9351	1	1	1	1.0
1#Erwinia_amylovora_CTST01_1	Unassigned	Unassigned	Unassigned	5_0	Clustered	79	VC_5_0	79	0.9351	1.0	0.9351	1	1	1	1.0
1#Erwinia_amylovora_E2005A	Unassigned	Unassigned	Unassigned	2_0	Clustered	80	VC_2_0	80	0.7197	1.0	0.7197	1	1	1	1.0
1#Erwinia_amylovora_E2006P	Unassigned	Unassigned	Unassigned	12_0	Clustered	7	VC_12_0	7	0.8081	0.99999938	0.8081	1	1	1	1.0
1#Erwinia_amylovora_EA110	Unassigned	Unassigned	Unassigned	5_0	Clustered	79	VC_5_0	79	0.9351	1.0	0.9351	1	1	1	1.0
1#Erwinia_amylovora_E_2	Unassigned	Unassigned	Unassigned	2_0	Clustered	80	VC_2_0	80	0.7197	1.0	0.7197	1	1	1	1.0
1#Erwinia_amylovora_Ea01_03	Unassigned	Unassigned	Unassigned	4_0	Clustered	17	VC_4_0	17	0.5474	1.0	0.5474	1	1	1	1.0
1#Erwinia_amylovora_Ea02_03	Unassigned	Unassigned	Unassigned	4_0	Clustered	17	VC_4_0	17	0.5474	1.0	0.5474	1	1	1	1.0
1#Erwinia_amylovora_Ea03_03	Unassigned	Unassigned	Unassigned	17_0	Clustered	77	VC_17_0	77	0.9003	1.0	0.9003	1	1	1	1.0
1#Erwinia_amylovora_Ea04_03	Unassigned	Unassigned	Unassigned	3_0	Clustered	5	VC_3_0	5	0.1226	0.99999997	0.1226	1	1	1	1.0
1#Erwinia_amylovora_Ea116_5_29	Unassigned	Unassigned	Unassigned	2_0	Clustered	80	VC_2_0	80	0.7197	1.0	0.7197	1	1	1	1.0
1#Erwinia_amylovora_Ea1189	Unassigned	Unassigned	Unassigned	2_0	Clustered	80	VC_2_0	80	0.7197	1.0	0.7197	1	1	1	1.0
1#Erwinia_amylovora_Ea123_5_51	Unassigned	Unassigned	Unassigned	3_0	Clustered	5	VC_3_0	5	0.1226	0.99999997	0.1226	1	1	1	1.0
1#Erwinia_amylovora_Ea160_3_51	Unassigned	Unassigned	Unassigned	7_0	Clustered	111	VC_7_0	111	0.9935	1.0	0.9935	1	1	1	1.0
1#Erwinia_amylovora_Ea160_4_51	Unassigned	Unassigned	Unassigned	12_0	Clustered	7	VC_12_0	7	0.8081	0.99999938	0.8081	1	1	1	1.0
1#Erwinia_amylovora_Ea169	Unassigned	Unassigned	Unassigned	2_0	Clustered	80	VC_2_0	80	0.7197	1.0	0.7197	1	1	1	1.0
1#Erwinia_amylovora_Ea17_1_1	Unassigned	Unassigned	Unassigned	7_0	Clustered	111	VC_7_0	111	0.9935	1.0	0.9935	1	1	1	1.0
1#Erwinia_amylovora_Ea1_00	Unassigned	Unassigned	Unassigned	7_0	Clustered	111	VC_7_0	111	0.9935	1.0	0.9935	1	1	1	1.0
1#Erwinia_amylovora_Ea1_79Sm	Unassigned	Unassigned	Unassigned	5_0	Clustered	79	VC_5_0	79	0.9351	1.0	0.9351	1	1	1	1.0
1#Erwinia_amylovora_Ea1_95	Unassigned	Unassigned	Unassigned	17_0	Clustered	77	VC_17_0	77	0.9003	1.0	0.9003	1	1	1	1.0
1#Erwinia_amylovora_Ea1_97	Unassigned	Unassigned	Unassigned	12_0	Clustered	7	VC_12_0	7	0.8081	0.99999938	0.8081	1	1	1	1.0
1#Erwinia_amylovora_Ea1_98	Unassigned	Unassigned	Unassigned	17_0	Clustered	77	VC_17_0	77	0.9003	1.0	0.9003	1	1	1	1.0
1#Erwinia_amylovora_Ea266	Unassigned	Unassigned	Unassigned	7_0	Clustered	111	VC_7_0	111	0.9935	1.0	0.9935	1	1	1	1.0
1#Erwinia_amylovora_Ea29_7	Unassigned	Unassigned	Unassigned	7_0	Clustered	111	VC_7_0	111	0.9935	1.0	0.9935	1	1	1	1.0
1#Erwinia_amylovora_Ea2_95	Unassigned	Unassigned	Unassigned	12_0	Clustered	7	VC_12_0	7	0.8081	0.99999938	0.8081	1	1	1	1.0
1#Erwinia_amylovora_Ea2_97	Unassigned	Unassigned	Unassigned	17_0	Clustered	77	VC_17_0	77	0.9003	1.0	0.9003	1	1	1	1.0
1#Erwinia_amylovora_Ea315_1	Unassigned	Unassigned	Unassigned	2_0	Clustered	80	VC_2_0	80	0.7197	1.0	0.7197	1	1	1	1.0
1#Erwinia_amylovora_Ea321	Unassigned	Unassigned	Unassigned	5_0	Clustered	79	VC_5_0	79	0.9351	1.0	0.9351	1	1	1	1.0
1#Erwinia_amylovora_Ea356	Unassigned	Unassigned	Unassigned	7_0	Clustered	111	VC_7_0	111	0.9935	1.0	0.9935	1	1	1	1.0
1#Erwinia_amylovora_Ea367	Unassigned	Unassigned	Unassigned	7_0	Clustered	111	VC_7_0	111	0.9935	1.0	0.9935	1	1	1	1.0
1#Erwinia_amylovora_Ea3_97	Unassigned	Unassigned	Unassigned	26_0	Clustered	23	VC_26_0	23	0.7517	1.0	0.7517	6	2	2	0.9842
1#Erwinia_amylovora_Ea3a_H1_II	Unassigned	Unassigned	Unassigned	5_0	Clustered	79	VC_5_0	79	0.9351	1.0	0.9351	1	1	1	1.0
1#Erwinia_amylovora_Ea433	Unassigned	Unassigned	Unassigned	2_0	Clustered	80	VC_2_0	80	0.7197	1.0	0.7197	1	1	1	1.0
1#Erwinia_amylovora_Ea435	Unassigned	Unassigned	Unassigned	2_0	Clustered	80	VC_2_0	80	0.7197	1.0	0.7197	1	1	1	1.0
1#Erwinia_amylovora_Ea440	Unassigned	Unassigned	Unassigned	2_0	Clustered	80	VC_2_0	80	0.7197	1.0	0.7197	1	1	1	1.0
1#Erwinia_amylovora_Ea464	Unassigned	Unassigned	Unassigned	7_0	Clustered	111	VC_7_0	111	0.9935	1.0	0.9935	1	1	1	1.0
1#Erwinia_amylovora_Ea4_96	Unassigned	Unassigned	Unassigned	4_0	Clustered	17	VC_4_0	17	0.5474	1.0	0.5474	1	1	1	1.0
1#Erwinia_amylovora_Ea4_97	Unassigned	Unassigned	Unassigned	2_0	Clustered	80	VC_2_0	80	0.7197	1.0	0.7197	1	1	1	1.0
1#Erwinia_amylovora_Ea5_97	Unassigned	Unassigned	Unassigned	2_0	Clustered	80	VC_2_0	80	0.7197	1.0	0.7197	1	1	1	1.0
1#Erwinia_amylovora_Ea644	Unassigned	Unassigned	Unassigned	4_0	Clustered	17	VC_4_0	17	0.5474	1.0	0.5474	1	1	1	1.0
1#Erwinia_amylovora_Ea650	Unassigned	Unassigned	Unassigned	7_0	Clustered	111	VC_7_0	111	0.9935	1.0	0.9935	1	1	1	1.0
1#Erwinia_amylovora_Ea6_4	Unassigned	Unassigned	Unassigned	2_0	Clustered	80	VC_2_0	80	0.7197	1.0	0.7197	1	1	1	1.0
1#Erwinia_amylovora_Ea6_96	Unassigned	Unassigned	Unassigned	6_0	Clustered	16	VC_6_0	16	0.5086	1.0	0.5086	1	1	1	0.9833
1#Erwinia_amylovora_Ea6_97	Unassigned	Unassigned	Unassigned	2_0	Clustered	80	VC_2_0	80	0.7197	1.0	0.7197	1	1	1	1.0
1#Erwinia_amylovora_Ea7_96	Unassigned	Unassigned	Unassigned	17_0	Clustered	77	VC_17_0	77	0.9003	1.0	0.9003	1	1	1	1.0
1#Erwinia_amylovora_Ea8_96	Unassigned	Unassigned	Unassigned	4_0	Clustered	17	VC_4_0	17	0.5474	1.0	0.5474	1	1	1	1.0
1#Erwinia_amylovora_Ea92_1_1	Unassigned	Unassigned	Unassigned	7_0	Clustered	111	VC_7_0	111	0.9935	1.0	0.9935	1	1	1	1.0
1#Erwinia_amylovora_Ea92_1_2	Unassigned	Unassigned	Unassigned	7_0	Clustered	111	VC_7_0	111	0.9935	1.0	0.9935	1	1	1	1.0
1#Erwinia_amylovora_EaB_110	Unassigned	Unassigned	Unassigned	2_0	Clustered	80	VC_2_0	80	0.7197	1.0	0.7197	1	1	1	1.0
1#Erwinia_amylovora_EaD_7	Unassigned	Unassigned	Unassigned	2_0	Clustered	80	VC_2_0	80	0.7197	1.0	0.7197	1	1	1	1.0
1#Erwinia_amylovora_EaG5	Unassigned	Unassigned	Unassigned	5_0	Clustered	79	VC_5_0	79	0.9351	1.0	0.9351	1	1	1	1.0
1#Erwinia_amylovora_EaIF	Unassigned	Unassigned	Unassigned	0_0	Clustered	3	VC_0_0	3	0.0211	0.99861865	0.0211	1	1	1	1.0
1#Erwinia_amylovora_EaLevo2	Unassigned	Unassigned	Unassigned	17_0	Clustered	77	VC_17_0	77	0.9003	1.0	0.9003	1	1	1	1.0
1#Erwinia_amylovora_FB_20	Unassigned	Unassigned	Unassigned	2_0	Clustered	80	VC_2_0	80	0.7197	1.0	0.7197	1	1	1	1.0
1#Erwinia_amylovora_FB_207	Unassigned	Unassigned	Unassigned	2_0	Clustered	80	VC_2_0	80	0.7197	1.0	0.7197	1	1	1	1.0
1#Erwinia_amylovora_FB_307	Unassigned	Unassigned	Unassigned	2_0	Clustered	80	VC_2_0	80	0.7197	1.0	0.7197	1	1	1	1.0
1#Erwinia_amylovora_FB_86	Unassigned	Unassigned	Unassigned	2_0	Clustered	80	VC_2_0	80	0.7197	1.0	0.7197	1	1	1	1.0
1#Erwinia_amylovora_Fb_97b	Unassigned	Unassigned	Unassigned	2_0	Clustered	80	VC_2_0	80	0.7197	1.0	0.7197	1	1	1	1.0
1#Erwinia_amylovora_HKN06P1	Unassigned	Unassigned	Unassigned	5_0	Clustered	79	VC_5_0	79	0.9351	1.0	0.9351	1	1	1	1.0
1#Erwinia_amylovora_IH_3_1	Unassigned	Unassigned	Unassigned	7_0	Clustered	111	VC_7_0	111	0.9935	1.0	0.9935	1	1	1	1.0
1#Erwinia_amylovora_IVIA2303	Unassigned	Unassigned	Unassigned	7_0	Clustered	111	VC_7_0	111	0.9935	1.0	0.9935	1	1	1	1.0
1#Erwinia_amylovora_LA092	Unassigned	Unassigned	Unassigned	5_0	Clustered	79	VC_5_0	79	0.9351	1.0	0.9351	1	1	1	1.0
1#Erwinia_amylovora_LA635	Unassigned	Unassigned	Unassigned	5_0	Clustered	79	VC_5_0	79	0.9351	1.0	0.9351	1	1	1	1.0
1#Erwinia_amylovora_LA636	Unassigned	Unassigned	Unassigned	5_0	Clustered	79	VC_5_0	79	0.9351	1.0	0.9351	1	1	1	1.0
1#Erwinia_amylovora_LA637	Unassigned	Unassigned	Unassigned	5_0	Clustered	79	VC_5_0	79	0.9351	1.0	0.9351	1	1	1	1.0
1#Erwinia_amylovora_MAGFLF_2	Unassigned	Unassigned	Unassigned	2_0	Clustered	80	VC_2_0	80	0.7197	1.0	0.7197	1	1	1	1.0
1#Erwinia_amylovora_MANB02_1	Unassigned	Unassigned	Unassigned	2_0	Clustered	80	VC_2_0	80	0.7197	1.0	0.7197	1	1	1	1.0
1#Erwinia_amylovora_MASHBO	Unassigned	Unassigned	Unassigned	17_0	Clustered	77	VC_17_0	77	0.9003	1.0	0.9003	1	1	1	1.0
1#Erwinia_amylovora_MLI181_18	Unassigned	Unassigned	Unassigned	2_0	Clustered	80	VC_2_0	80	0.7197	1.0	0.7197	1	1	1	1.0
1#Erwinia_amylovora_MLI200_18	Unassigned	Unassigned	Unassigned	5_0	Clustered	79	VC_5_0	79	0.9351	1.0	0.9351	1	1	1	1.0
1#Erwinia_amylovora_MLI217_18	Unassigned	Unassigned	Unassigned	7_0	Clustered	111	VC_7_0	111	0.9935	1.0	0.9935	1	1	1	1.0
1#Erwinia_amylovora_MLI90_17	Unassigned	Unassigned	Unassigned	2_0	Clustered	80	VC_2_0	80	0.7197	1.0	0.7197	1	1	1	1.0
1#Erwinia_amylovora_NHSB01_1	Unassigned	Unassigned	Unassigned	5_0	Clustered	79	VC_5_0	79	0.9351	1.0	0.9351	1	1	1	1.0
1#Erwinia_amylovora_NHWL02_2	Unassigned	Unassigned	Unassigned	5_0	Clustered	79	VC_5_0	79	0.9351	1.0	0.9351	1	1	1	1.0
1#Erwinia_amylovora_OR1	Unassigned	Unassigned	Unassigned	5_0	Clustered	79	VC_5_0	79	0.9351	1.0	0.9351	1	1	1	1.0
1#Erwinia_amylovora_OR6	Unassigned	Unassigned	Unassigned	5_0	Clustered	79	VC_5_0	79	0.9351	1.0	0.9351	1	1	1	1.0
1#Erwinia_amylovora_O_RG_21	Unassigned	Unassigned	Unassigned	7_0	Clustered	111	VC_7_0	111	0.9935	1.0	0.9935	1	1	1	1.0
1#Erwinia_amylovora_P_C_3b	Unassigned	Unassigned	Unassigned	2_0	Clustered	80	VC_2_0	80	0.7197	1.0	0.7197	1	1	1	1.0
1#Erwinia_amylovora_RISTBO01_2	Unassigned	Unassigned	Unassigned	2_0	Clustered	80	VC_2_0	80	0.7197	1.0	0.7197	1	1	1	1.0
1#Erwinia_amylovora_TS3128	Unassigned	Unassigned	Unassigned	5_0	Clustered	79	VC_5_0	79	0.9351	1.0	0.9351	1	1	1	1.0
1#Erwinia_amylovora_TS3238	Unassigned	Unassigned	Unassigned	2_0	Clustered	80	VC_2_0	80	0.7197	1.0	0.7197	1	1	1	1.0
1#Erwinia_amylovora_UT5P4	Unassigned	Unassigned	Unassigned	5_0	Clustered	79	VC_5_0	79	0.9351	1.0	0.9351	1	1	1	1.0
1#Erwinia_amylovora_VTBL01_1	Unassigned	Unassigned	Unassigned	5_0	Clustered	79	VC_5_0	79	0.9351	1.0	0.9351	1	1	1	1.0
1#Erwinia_amylovora_VTDMSF02	Unassigned	Unassigned	Unassigned	2_0	Clustered	80	VC_2_0	80	0.7197	1.0	0.7197	1	1	1	1.0
1#Erwinia_amylovora_WSDA87_73	Unassigned	Unassigned	Unassigned	5_0	Clustered	79	VC_5_0	79	0.9351	1.0	0.9351	1	1	1	1.0
1#Erwinia_aphidicola_JCM_21238	Unassigned	Unassigned	Unassigned	28_0	Clustered	20	VC_28_0	20	609	1.0	609	1	1	1	1.0
1#Erwinia_aphidicola_isolate_Bi13	Unassigned	Unassigned	Unassigned	28_0	Clustered	20	VC_28_0	20	609	1.0	609	1	1	1	1.0
1#Erwinia_billingiae_Eb661	Unassigned	Unassigned	Unassigned	26_0	Clustered	23	VC_26_0	23	0.7517	1.0	0.7517	6	2	2	0.9842
1#Erwinia_billingiae_MYb121	Unassigned	Unassigned	Unassigned	34_0	Clustered	2	VC_34_0	2	0.2271	0.9511748	216	1	1	1	1.0
1#Erwinia_billingiae_PBb	Unassigned	Unassigned	Unassigned	13_0	Clustered	10	VC_13_0	10	0.3102	1.0	0.3102	1	1	1	0.9333
1#Erwinia_billingiae_TH88	Unassigned	Unassigned	Unassigned	17_0	Clustered	77	VC_17_0	77	0.9003	1.0	0.9003	1	1	1	1.0
1#Erwinia_billingiae_isolate_UBA5038	Unassigned	Unassigned	Unassigned	13_0	Clustered	10	VC_13_0	10	0.3102	1.0	0.3102	1	1	1	0.9333
1#Erwinia_gerundensis_AR	Unassigned	Unassigned	Unassigned	17_0	Clustered	77	VC_17_0	77	0.9003	1.0	0.9003	1	1	1	1.0
1#Erwinia_gerundensis_Eg13_2	Unassigned	Unassigned	Unassigned	17_0	Clustered	77	VC_17_0	77	0.9003	1.0	0.9003	1	1	1	1.0
1#Erwinia_gerundensis_Eg13_3	Unassigned	Unassigned	Unassigned	17_0	Clustered	77	VC_17_0	77	0.9003	1.0	0.9003	1	1	1	1.0
1#Erwinia_gerundensis_Eg31_2	Unassigned	Unassigned	Unassigned	36_5	Clustered/Singleton	1	VC_36_5	1	0.0	1.0	0.0	1	1	1	1.0
1#Erwinia_gerundensis_Eg31_5	Unassigned	Unassigned	Unassigned	17_0	Clustered	77	VC_17_0	77	0.9003	1.0	0.9003	1	1	1	1.0
1#Erwinia_gerundensis_isolate_A4	Unassigned	Unassigned	Unassigned	17_0	Clustered	77	VC_17_0	77	0.9003	1.0	0.9003	1	1	1	1.0
1#Erwinia_iniecta_B120	Unassigned	Unassigned	Unassigned	53_0	Clustered	2	VC_53_0	2	1.0	1.0	1.0	1	1	1	1.0
1#Erwinia_iniecta_B149	Unassigned	Unassigned	Unassigned	53_0	Clustered	2	VC_53_0	2	1.0	1.0	1.0	1	1	1	1.0
1#Erwinia_oleae_DAPP_PG531	Unassigned	Unassigned	Unassigned	17_0	Clustered	77	VC_17_0	77	0.9003	1.0	0.9003	1	1	1	1.0
1#Erwinia_persicina_B64	Unassigned	Unassigned	Unassigned	17_0	Clustered	77	VC_17_0	77	0.9003	1.0	0.9003	1	1	1	1.0
1#Erwinia_persicina_CFBP1351100_0	Unassigned	Unassigned	Unassigned	13_0	Clustered	10	VC_13_0	10	0.3102	1.0	0.3102	1	1	1	0.9333
1#Erwinia_persicina_CFBP13732_CFBP13732001	Unassigned	Unassigned	Unassigned	28_0	Clustered	20	VC_28_0	20	609	1.0	609	1	1	1	1.0
1#Erwinia_persicina_CFBP8767_CFBP8767001	Unassigned	Unassigned	Unassigned	28_0	Clustered	20	VC_28_0	20	609	1.0	609	1	1	1	1.0
1#Erwinia_persicina_CFBP8795_CFBP879501	Unassigned	Unassigned	Unassigned	57_0	Clustered	9	VC_57_0	9	0.7272	1.0	0.7272	2	2	2	1.0
1#Erwinia_persicina_CFBP8797_CFBP879701	Unassigned	Unassigned	Unassigned	28_0	Clustered	20	VC_28_0	20	609	1.0	609	1	1	1	1.0
1#Erwinia_persicina_CFBP8803_CFBP880301	Unassigned	Unassigned	Unassigned	28_0	Clustered	20	VC_28_0	20	609	1.0	609	1	1	1	1.0
1#Erwinia_persicina_Cp2	Unassigned	Unassigned	Unassigned	49_0	Clustered	12	VC_49_0	12	449	1.0	449	1	1	1	1.0
1#Erwinia_persicina_DOAB1061_DOAB1061	Unassigned	Unassigned	Unassigned	29_0	Clustered	32	VC_29_0	32	0.5208	1.0	0.5208	6	2	2	1.0
1#Erwinia_persicina_NBRC_102418_DNA	Unassigned	Unassigned	Unassigned	61_0	Clustered	2	VC_61_0	2	0.1979	0.5	99	1	1	1	1.0
1#Erwinia_pyrifoliae_DSM_12163	Unassigned	Unassigned	Unassigned	65_0	Clustered	4	VC_65_0	4	0.2879	0.99997326	0.2879	1	1	1	1.0
1#Erwinia_pyrifoliae_Ep1_96	Unassigned	Unassigned	Unassigned	65_0	Clustered	4	VC_65_0	4	0.2879	0.99997326	0.2879	1	1	1	1.0
1#Erwinia_pyrifoliae_EpK1_15	Unassigned	Unassigned	Unassigned	66_0	Clustered	4	VC_66_0	4	1.0	1.0	1.0	1	1	1	1.0
1#Erwinia_pyrifoliae_YKB12328	Unassigned	Unassigned	Unassigned	65_0	Clustered	4	VC_65_0	4	0.2879	0.99997326	0.2879	1	1	1	1.0
1#Erwinia_rhapontici_BIGb0435_Ga0304803	Unassigned	Unassigned	Unassigned	47_0	Clustered	13	VC_47_0	13	0.7006	1.0	0.7006	2	2	2	0.9872
1#Erwinia_rhapontici_BY21311	Unassigned	Unassigned	Unassigned	17_0	Clustered	77	VC_17_0	77	0.9003	1.0	0.9003	1	1	1	1.0
1#Erwinia_rhapontici_CGMCC16978	Unassigned	Unassigned	Unassigned	19_0	Clustered	6	VC_19_0	6	0.3053	1.0	0.3053	1	1	1	1.0
1#Erwinia_rhapontici_H1	Unassigned	Unassigned	Unassigned	19_0	Clustered	6	VC_19_0	6	0.3053	1.0	0.3053	1	1	1	1.0
1#Erwinia_rhapontici_MAFF_311153	Unassigned	Unassigned	Unassigned	73_0	Clustered	4	VC_73_0	4	1.0	1.0	1.0	1	1	1	1.0
1#Erwinia_rhapontici_MAFF_311154	Unassigned	Unassigned	Unassigned	49_0	Clustered	12	VC_49_0	12	449	1.0	449	1	1	1	1.0
1#Erwinia_rhapontici_WS3235_Ga0466830	Unassigned	Unassigned	Unassigned	28_0	Clustered	20	VC_28_0	20	609	1.0	609	1	1	1	1.0
1#Erwinia_sp_E602	Unassigned	Unassigned	Unassigned	19_0	Clustered	6	VC_19_0	6	0.3053	1.0	0.3053	1	1	1	1.0
1#Erwinia_sp_EM595_EM595	Unassigned	Unassigned	Unassigned	77_0	Clustered	2	VC_77_0	2	0.1517	0.91813282	0.1393	1	1	1	1.0
1#Erwinia_sp_Ejp617	Unassigned	Unassigned	Unassigned	17_0	Clustered	77	VC_17_0	77	0.9003	1.0	0.9003	1	1	1	1.0
1#Erwinia_sp_ErVv1_Ervv1fasta	Unassigned	Unassigned	Unassigned	75_0	Clustered	2	VC_75_0	2	0.0786	0.6365361	0.05	1	1	1	1.0
1#Erwinia_sp_J316	Unassigned	Unassigned	Unassigned	17_0	Clustered	77	VC_17_0	77	0.9003	1.0	0.9003	1	1	1	1.0
1#Erwinia_sp_J780	Unassigned	Unassigned	Unassigned	17_0	Clustered	77	VC_17_0	77	0.9003	1.0	0.9003	1	1	1	1.0
1#Erwinia_sp_JH02	Unassigned	Unassigned	Unassigned	79_0	Clustered	2	VC_79_0	2	0.1123	0.94384779	106	1	1	1	1.0
1#Erwinia_sp_JUb26_Ga0304838	Unassigned	Unassigned	Unassigned	69_0	Clustered	3	VC_69_0	3	0.1004	0.94549056	0.0949	1	1	1	1.0
1#Erwinia_sp_Leaf53	Unassigned	Unassigned	Unassigned	19_0	Clustered	6	VC_19_0	6	0.3053	1.0	0.3053	1	1	1	1.0
1#Erwinia_sp_OAMSP11	Unassigned	Unassigned	Unassigned	64_0	Clustered	7	VC_64_0	7	0.6184	1.0	0.6184	1	1	1	1.0
1#Erwinia_sp_OLCASP19	Unassigned	Unassigned	Unassigned	17_0	Clustered	77	VC_17_0	77	0.9003	1.0	0.9003	1	1	1	1.0
1#Erwinia_sp_OLFS4	Unassigned	Unassigned	Unassigned	17_0	Clustered	77	VC_17_0	77	0.9003	1.0	0.9003	1	1	1	1.0
1#Erwinia_sp_OLMDSP33	Unassigned	Unassigned	Unassigned	64_0	Clustered	7	VC_64_0	7	0.6184	1.0	0.6184	1	1	1	1.0
1#Erwinia_sp_OLMTSP26	Unassigned	Unassigned	Unassigned	17_0	Clustered	77	VC_17_0	77	0.9003	1.0	0.9003	1	1	1	1.0
1#Erwinia_sp_OLSSP12	Unassigned	Unassigned	Unassigned	17_0	Clustered	77	VC_17_0	77	0.9003	1.0	0.9003	1	1	1	1.0
1#Erwinia_sp_OLTSP20	Unassigned	Unassigned	Unassigned	82_0	Clustered	2	VC_82_0	2	0.7121	0.76024994	0.5414	1	1	1	1.0
1#Erwinia_sp_QL_Z3	Unassigned	Unassigned	Unassigned	17_0	Clustered	77	VC_17_0	77	0.9003	1.0	0.9003	1	1	1	1.0
1#Erwinia_sp_S38	Unassigned	Unassigned	Unassigned	13_0	Clustered	10	VC_13_0	10	0.3102	1.0	0.3102	1	1	1	0.9333
1#Erwinia_sp_S43	Unassigned	Unassigned	Unassigned	17_0	Clustered	77	VC_17_0	77	0.9003	1.0	0.9003	1	1	1	1.0
1#Erwinia_tasmaniensis_ET1_99	Unassigned	Unassigned	Unassigned	27_0	Clustered	15	VC_27_0	15	0.3014	1.0	0.3014	2	2	2	1.0
1#Erwinia_toletana_DAPP_PG_735	Unassigned	Unassigned	Unassigned	54_0	Clustered	2	VC_54_0	2	0.7763	0.76024994	0.5902	1	1	1	1.0
1#Erwinia_toletana_WS4403_Ga0466831	Unassigned	Unassigned	Unassigned	29_0	Clustered	32	VC_29_0	32	0.5208	1.0	0.5208	6	2	2	1.0
1#Erwinia_tracheiphila_MDCuke	Unassigned	Unassigned	Unassigned	26_0	Clustered	23	VC_26_0	23	0.7517	1.0	0.7517	6	2	2	0.9842
1#Erwinia_tracheiphila_SCR3	Unassigned	Unassigned	Unassigned	26_0	Clustered	23	VC_26_0	23	0.7517	1.0	0.7517	6	2	2	0.9842
10#Erwinia_dacicola_Oroville	Unassigned	Unassigned	Unassigned	29_0	Clustered	32	VC_29_0	32	0.5208	1.0	0.5208	6	2	2	1.0
10#Erwinia_persicina_CFBP8795_CFBP879501	Unassigned	Unassigned	Unassigned	26_0	Clustered	23	VC_26_0	23	0.7517	1.0	0.7517	6	2	2	0.9842
10#Erwinia_sp_S38	Unassigned	Unassigned	Unassigned	17_0	Clustered	77	VC_17_0	77	0.9003	1.0	0.9003	1	1	1	1.0
10#Erwinia_tracheiphila_BHKY	Unassigned	Unassigned	Unassigned	57_0	Clustered	9	VC_57_0	9	0.7272	1.0	0.7272	2	2	2	1.0
10#Erwinia_tracheiphila_BuffGH	Unassigned	Unassigned	Unassigned	83_0	Clustered	13	VC_83_0	13	0.8428	1.0	0.8428	2	2	2	1.0
10#Erwinia_tracheiphila_PSU_1	Unassigned	Unassigned	Unassigned	57_0	Clustered	9	VC_57_0	9	0.7272	1.0	0.7272	2	2	2	1.0
11#Erwinia_Erwinia_dacicola_IL	Unassigned	Unassigned	Unassigned	31_0	Clustered	21	VC_31_0	21	0.9045	1.0	0.9045	11	2	2	1.0
11#Erwinia_dacicola_Oroville	Unassigned	Unassigned	Unassigned	31_0	Clustered	21	VC_31_0	21	0.9045	1.0	0.9045	11	2	2	1.0
11#Erwinia_persicina_CFBP8795_CFBP879501	Unassigned	Unassigned	Unassigned	96_0	Clustered	3	VC_96_0	3	0.9485	0.93592672	0.8877	1	1	1	1.0
11#Erwinia_tracheiphila_BHKY	Unassigned	Unassigned	Unassigned	97_0	Clustered	3	VC_97_0	3	0.7311	0.99822585	0.7298	1	1	1	1.0
11#Erwinia_tracheiphila_BuffGH	Unassigned	Unassigned	Unassigned	57_0	Clustered	9	VC_57_0	9	0.7272	1.0	0.7272	2	2	2	1.0
11#Erwinia_tracheiphila_MDCuke	Unassigned	Unassigned	Unassigned	57_0	Clustered	9	VC_57_0	9	0.7272	1.0	0.7272	2	2	2	1.0
11#Erwinia_tracheiphila_PSU_1	Unassigned	Unassigned	Unassigned	83_0	Clustered	13	VC_83_0	13	0.8428	1.0	0.8428	2	2	2	1.0
11#Erwinia_tracheiphila_SCR3	Unassigned	Unassigned	Unassigned	91_0	Clustered	5	VC_91_0	5	0.2865	0.99999597	0.2865	1	1	1	1.0
12#Erwinia_Erwinia_dacicola_IL	Unassigned	Unassigned	Unassigned	74_0	Clustered	4	VC_74_0	4	0.2535	0.99826033	253	1	1	1	1.0
12#Erwinia_tracheiphila_BuffGH	Unassigned	Unassigned	Unassigned	97_0	Clustered	3	VC_97_0	3	0.7311	0.99822585	0.7298	1	1	1	1.0
12#Erwinia_tracheiphila_MDCuke	Unassigned	Unassigned	Unassigned	102_0	Clustered	5	VC_102_0	5	0.6463	0.9999996	0.6463	1	1	1	1.0
12#Erwinia_tracheiphila_SCR3	Unassigned	Unassigned	Unassigned	57_0	Clustered	9	VC_57_0	9	0.7272	1.0	0.7272	2	2	2	1.0
13#Erwinia_tracheiphila_BHKY	Unassigned	Unassigned	Unassigned	67_0	Clustered	7	VC_67_0	7	0.4453	0.99999809	0.4453	1	1	1	1.0
13#Erwinia_tracheiphila_PSU_1	Unassigned	Unassigned	Unassigned	68_0	Clustered	5	VC_68_0	5	0.5396	0.99999992	0.5396	1	1	1	1.0
13#Erwinia_tracheiphila_SCR3	Unassigned	Unassigned	Unassigned	102_0	Clustered	5	VC_102_0	5	0.6463	0.9999996	0.6463	1	1	1	1.0
14#Erwinia_Erwinia_dacicola_IL	Unassigned	Unassigned	Unassigned	86_0	Clustered	2	VC_86_0	2	0.1183	0.9420176	0.1115	1	1	1	1.0
14#Erwinia_tracheiphila_BHKY	Unassigned	Unassigned	Unassigned	68_0	Clustered	5	VC_68_0	5	0.5396	0.99999992	0.5396	1	1	1	1.0
14#Erwinia_tracheiphila_BuffGH	Unassigned	Unassigned	Unassigned	67_0	Clustered	7	VC_67_0	7	0.4453	0.99999809	0.4453	1	1	1	1.0
14#Erwinia_tracheiphila_PSU_1	Unassigned	Unassigned	Unassigned	110_0	Clustered	4	VC_110_0	4	0.4912	0.99781366	0.4901	1	1	1	1.0
14#Erwinia_tracheiphila_SCR3	Unassigned	Unassigned	Unassigned	38_0	Clustered	3	VC_38_0	3	0.3212	0.9982427	0.3207	1	1	1	1.0
15#Erwinia_tracheiphila_BHKY	Unassigned	Unassigned	Unassigned	110_0	Clustered	4	VC_110_0	4	0.4912	0.99781366	0.4901	1	1	1	1.0
15#Erwinia_tracheiphila_BuffGH	Unassigned	Unassigned	Unassigned	68_0	Clustered	5	VC_68_0	5	0.5396	0.99999992	0.5396	1	1	1	1.0
15#Erwinia_tracheiphila_MDCuke	Unassigned	Unassigned	Unassigned	92_0	Clustered	4	VC_92_0	4	0.2584	0.99997282	0.2584	1	1	1	1.0
15#Erwinia_tracheiphila_SCR3	Unassigned	Unassigned	Unassigned	92_0	Clustered	4	VC_92_0	4	0.2584	0.99997282	0.2584	1	1	1	1.0
16#Erwinia_tracheiphila_BHKY	Unassigned	Unassigned	Unassigned	113_0	Clustered	4	VC_113_0	4	898	0.9989706	0.8971	1	1	1	1.0
16#Erwinia_tracheiphila_BuffGH	Unassigned	Unassigned	Unassigned	26_0	Clustered	23	VC_26_0	23	0.7517	1.0	0.7517	6	2	2	0.9842
16#Erwinia_tracheiphila_MDCuke	Unassigned	Unassigned	Unassigned	104_0	Clustered	4	VC_104_0	4	0.5047	0.99997623	0.5047	1	1	1	1.0
16#Erwinia_tracheiphila_SCR3	Unassigned	Unassigned	Unassigned	104_0	Clustered	4	VC_104_0	4	0.5047	0.99997623	0.5047	1	1	1	1.0
17#Erwinia_tracheiphila_BHKY	Unassigned	Unassigned	Unassigned	15_0	Clustered	2	VC_15_0	2	0.0942	0.95522404	0.09	1	1	1	1.0
17#Erwinia_tracheiphila_BuffGH	Unassigned	Unassigned	Unassigned	26_0	Clustered	23	VC_26_0	23	0.7517	1.0	0.7517	6	2	2	0.9842
17#Erwinia_tracheiphila_PSU_1	Unassigned	Unassigned	Unassigned	9_0	Clustered	4	VC_9_0	4	0.6489	0.99995005	0.6489	1	1	1	1.0
18#Erwinia_tracheiphila_BHKY	Unassigned	Unassigned	Unassigned	46_0	Clustered	5	VC_46_0	5	0.2803	0.99999332	0.2803	1	1	1	1.0
18#Erwinia_tracheiphila_BuffGH	Unassigned	Unassigned	Unassigned	113_0	Clustered	4	VC_113_0	4	898	0.9989706	0.8971	1	1	1	1.0
18#Erwinia_tracheiphila_MDCuke	Unassigned	Unassigned	Unassigned	111_0	Clustered	2	VC_111_0	2	0.5421	0.94585423	0.5127	1	1	1	1.0
18#Erwinia_tracheiphila_PSU_1	Unassigned	Unassigned	Unassigned	89_0	Clustered	5	VC_89_0	5	0.6638	0.99999937	0.6638	1	1	1	1.0
18#Erwinia_tracheiphila_SCR3	Unassigned	Unassigned	Unassigned	111_0	Clustered	2	VC_111_0	2	0.5421	0.94585423	0.5127	1	1	1	1.0
19#Erwinia_tracheiphila_BHKY	Unassigned	Unassigned	Unassigned	83_0	Clustered	13	VC_83_0	13	0.8428	1.0	0.8428	2	2	2	1.0
19#Erwinia_tracheiphila_BuffGH	Unassigned	Unassigned	Unassigned	15_0	Clustered	2	VC_15_0	2	0.0942	0.95522404	0.09	1	1	1	1.0
19#Erwinia_tracheiphila_MDCuke	Unassigned	Unassigned	Unassigned	89_0	Clustered	5	VC_89_0	5	0.6638	0.99999937	0.6638	1	1	1	1.0
19#Erwinia_tracheiphila_PSU_1	Unassigned	Unassigned	Unassigned	87_0	Clustered	4	VC_87_0	4	0.3024	0.99998121	0.3024	1	1	1	1.0
19#Erwinia_tracheiphila_SCR3	Unassigned	Unassigned	Unassigned	89_0	Clustered	5	VC_89_0	5	0.6638	0.99999937	0.6638	1	1	1	1.0
2#Erwinia_Erwinia_dacicola_IL	Unassigned	Unassigned	Unassigned	39_0	Clustered	5	VC_39_0	5	0.8527	0.99999789	0.8527	2	2	2	1.0
2#Erwinia_amylovora_01SFR_BO	Unassigned	Unassigned	Unassigned	5_0	Clustered	79	VC_5_0	79	0.9351	1.0	0.9351	1	1	1	1.0
2#Erwinia_amylovora_11_7	Unassigned	Unassigned	Unassigned	7_0	Clustered	111	VC_7_0	111	0.9935	1.0	0.9935	1	1	1	1.0
2#Erwinia_amylovora_1279	Unassigned	Unassigned	Unassigned	2_0	Clustered	80	VC_2_0	80	0.7197	1.0	0.7197	1	1	1	1.0
2#Erwinia_amylovora_1280	Unassigned	Unassigned	Unassigned	7_0	Clustered	111	VC_7_0	111	0.9935	1.0	0.9935	1	1	1	1.0
2#Erwinia_amylovora_1400_1	Unassigned	Unassigned	Unassigned	2_0	Clustered	80	VC_2_0	80	0.7197	1.0	0.7197	1	1	1	1.0
2#Erwinia_amylovora_1400_2	Unassigned	Unassigned	Unassigned	5_0	Clustered	79	VC_5_0	79	0.9351	1.0	0.9351	1	1	1	1.0
2#Erwinia_amylovora_1476	Unassigned	Unassigned	Unassigned	2_0	Clustered	80	VC_2_0	80	0.7197	1.0	0.7197	1	1	1	1.0
2#Erwinia_amylovora_1477_1	Unassigned	Unassigned	Unassigned	7_0	Clustered	111	VC_7_0	111	0.9935	1.0	0.9935	1	1	1	1.0
2#Erwinia_amylovora_1480_3	Unassigned	Unassigned	Unassigned	5_0	Clustered	79	VC_5_0	79	0.9351	1.0	0.9351	1	1	1	1.0
2#Erwinia_amylovora_1581	Unassigned	Unassigned	Unassigned	7_0	Clustered	111	VC_7_0	111	0.9935	1.0	0.9935	1	1	1	1.0
2#Erwinia_amylovora_1602	Unassigned	Unassigned	Unassigned	7_0	Clustered	111	VC_7_0	111	0.9935	1.0	0.9935	1	1	1	1.0
2#Erwinia_amylovora_1609	Unassigned	Unassigned	Unassigned	7_0	Clustered	111	VC_7_0	111	0.9935	1.0	0.9935	1	1	1	1.0
2#Erwinia_amylovora_1612	Unassigned	Unassigned	Unassigned	7_0	Clustered	111	VC_7_0	111	0.9935	1.0	0.9935	1	1	1	1.0
2#Erwinia_amylovora_1668	Unassigned	Unassigned	Unassigned	7_0	Clustered	111	VC_7_0	111	0.9935	1.0	0.9935	1	1	1	1.0
2#Erwinia_amylovora_1680	Unassigned	Unassigned	Unassigned	7_0	Clustered	111	VC_7_0	111	0.9935	1.0	0.9935	1	1	1	1.0
2#Erwinia_amylovora_1686	Unassigned	Unassigned	Unassigned	2_0	Clustered	80	VC_2_0	80	0.7197	1.0	0.7197	1	1	1	1.0
2#Erwinia_amylovora_20060013	Unassigned	Unassigned	Unassigned	7_0	Clustered	111	VC_7_0	111	0.9935	1.0	0.9935	1	1	1	1.0
2#Erwinia_amylovora_20070126	Unassigned	Unassigned	Unassigned	7_0	Clustered	111	VC_7_0	111	0.9935	1.0	0.9935	1	1	1	1.0
2#Erwinia_amylovora_20070245	Unassigned	Unassigned	Unassigned	2_0	Clustered	80	VC_2_0	80	0.7197	1.0	0.7197	1	1	1	1.0
2#Erwinia_amylovora_20070270	Unassigned	Unassigned	Unassigned	2_0	Clustered	80	VC_2_0	80	0.7197	1.0	0.7197	1	1	1	1.0
2#Erwinia_amylovora_214_07	Unassigned	Unassigned	Unassigned	2_0	Clustered	80	VC_2_0	80	0.7197	1.0	0.7197	1	1	1	1.0
2#Erwinia_amylovora_241_07	Unassigned	Unassigned	Unassigned	2_0	Clustered	80	VC_2_0	80	0.7197	1.0	0.7197	1	1	1	1.0
2#Erwinia_amylovora_245_07	Unassigned	Unassigned	Unassigned	7_0	Clustered	111	VC_7_0	111	0.9935	1.0	0.9935	1	1	1	1.0
2#Erwinia_amylovora_2558	Unassigned	Unassigned	Unassigned	7_0	Clustered	111	VC_7_0	111	0.9935	1.0	0.9935	1	1	1	1.0
2#Erwinia_amylovora_2570	Unassigned	Unassigned	Unassigned	2_0	Clustered	80	VC_2_0	80	0.7197	1.0	0.7197	1	1	1	1.0
2#Erwinia_amylovora_32_10	Unassigned	Unassigned	Unassigned	7_0	Clustered	111	VC_7_0	111	0.9935	1.0	0.9935	1	1	1	1.0
2#Erwinia_amylovora_3446_1	Unassigned	Unassigned	Unassigned	2_0	Clustered	80	VC_2_0	80	0.7197	1.0	0.7197	1	1	1	1.0
2#Erwinia_amylovora_3477_1	Unassigned	Unassigned	Unassigned	7_0	Clustered	111	VC_7_0	111	0.9935	1.0	0.9935	1	1	1	1.0
2#Erwinia_amylovora_3515_1	Unassigned	Unassigned	Unassigned	5_0	Clustered	79	VC_5_0	79	0.9351	1.0	0.9351	1	1	1	1.0
2#Erwinia_amylovora_39_I_II	Unassigned	Unassigned	Unassigned	2_0	Clustered	80	VC_2_0	80	0.7197	1.0	0.7197	1	1	1	1.0
2#Erwinia_amylovora_39_M1_II	Unassigned	Unassigned	Unassigned	2_0	Clustered	80	VC_2_0	80	0.7197	1.0	0.7197	1	1	1	1.0
2#Erwinia_amylovora_46_4_2	Unassigned	Unassigned	Unassigned	7_0	Clustered	111	VC_7_0	111	0.9935	1.0	0.9935	1	1	1	1.0
2#Erwinia_amylovora_ACW56400	Unassigned	Unassigned	Unassigned	5_0	Clustered	79	VC_5_0	79	0.9351	1.0	0.9351	1	1	1	1.0
2#Erwinia_amylovora_ATCC_49946	Unassigned	Unassigned	Unassigned	7_0	Clustered	111	VC_7_0	111	0.9935	1.0	0.9935	1	1	1	1.0
2#Erwinia_amylovora_BCEa23A	Unassigned	Unassigned	Unassigned	7_0	Clustered	111	VC_7_0	111	0.9935	1.0	0.9935	1	1	1	1.0
2#Erwinia_amylovora_CA3R	Unassigned	Unassigned	Unassigned	7_0	Clustered	111	VC_7_0	111	0.9935	1.0	0.9935	1	1	1	1.0
2#Erwinia_amylovora_CFBP_1995	Unassigned	Unassigned	Unassigned	7_0	Clustered	111	VC_7_0	111	0.9935	1.0	0.9935	1	1	1	1.0
2#Erwinia_amylovora_CFBP_2313	Unassigned	Unassigned	Unassigned	7_0	Clustered	111	VC_7_0	111	0.9935	1.0	0.9935	1	1	1	1.0
2#Erwinia_amylovora_CFBP_2585	Unassigned	Unassigned	Unassigned	5_0	Clustered	79	VC_5_0	79	0.9351	1.0	0.9351	1	1	1	1.0
2#Erwinia_amylovora_CFBP_7130	Unassigned	Unassigned	Unassigned	2_0	Clustered	80	VC_2_0	80	0.7197	1.0	0.7197	1	1	1	1.0
2#Erwinia_amylovora_CFBP_7131	Unassigned	Unassigned	Unassigned	7_0	Clustered	111	VC_7_0	111	0.9935	1.0	0.9935	1	1	1	1.0
2#Erwinia_amylovora_CTBT1_1	Unassigned	Unassigned	Unassigned	7_0	Clustered	111	VC_7_0	111	0.9935	1.0	0.9935	1	1	1	1.0
2#Erwinia_amylovora_CTBT3_1	Unassigned	Unassigned	Unassigned	7_0	Clustered	111	VC_7_0	111	0.9935	1.0	0.9935	1	1	1	1.0
2#Erwinia_amylovora_CTMF03_1	Unassigned	Unassigned	Unassigned	2_0	Clustered	80	VC_2_0	80	0.7197	1.0	0.7197	1	1	1	1.0
2#Erwinia_amylovora_CTST01_1	Unassigned	Unassigned	Unassigned	2_0	Clustered	80	VC_2_0	80	0.7197	1.0	0.7197	1	1	1	1.0
2#Erwinia_amylovora_E2005A	Unassigned	Unassigned	Unassigned	7_0	Clustered	111	VC_7_0	111	0.9935	1.0	0.9935	1	1	1	1.0
2#Erwinia_amylovora_E2006P	Unassigned	Unassigned	Unassigned	3_0	Clustered	5	VC_3_0	5	0.1226	0.99999997	0.1226	1	1	1	1.0
2#Erwinia_amylovora_EA110	Unassigned	Unassigned	Unassigned	2_0	Clustered	80	VC_2_0	80	0.7197	1.0	0.7197	1	1	1	1.0
2#Erwinia_amylovora_E_2	Unassigned	Unassigned	Unassigned	7_0	Clustered	111	VC_7_0	111	0.9935	1.0	0.9935	1	1	1	1.0
2#Erwinia_amylovora_Ea01_03	Unassigned	Unassigned	Unassigned	14_0	Clustered	2	VC_14_0	2	0.0978	0.95430312	0.0934	1	1	1	1.0
2#Erwinia_amylovora_Ea02_03	Unassigned	Unassigned	Unassigned	17_0	Clustered	77	VC_17_0	77	0.9003	1.0	0.9003	1	1	1	1.0
2#Erwinia_amylovora_Ea03_03	Unassigned	Unassigned	Unassigned	4_0	Clustered	17	VC_4_0	17	0.5474	1.0	0.5474	1	1	1	1.0
2#Erwinia_amylovora_Ea04_03	Unassigned	Unassigned	Unassigned	17_0	Clustered	77	VC_17_0	77	0.9003	1.0	0.9003	1	1	1	1.0
2#Erwinia_amylovora_Ea116_5_29	Unassigned	Unassigned	Unassigned	7_0	Clustered	111	VC_7_0	111	0.9935	1.0	0.9935	1	1	1	1.0
2#Erwinia_amylovora_Ea1189	Unassigned	Unassigned	Unassigned	7_0	Clustered	111	VC_7_0	111	0.9935	1.0	0.9935	1	1	1	1.0
2#Erwinia_amylovora_Ea160_4_51	Unassigned	Unassigned	Unassigned	7_0	Clustered	111	VC_7_0	111	0.9935	1.0	0.9935	1	1	1	1.0
2#Erwinia_amylovora_Ea169	Unassigned	Unassigned	Unassigned	7_0	Clustered	111	VC_7_0	111	0.9935	1.0	0.9935	1	1	1	1.0
2#Erwinia_amylovora_Ea17_1_1	Unassigned	Unassigned	Unassigned	2_0	Clustered	80	VC_2_0	80	0.7197	1.0	0.7197	1	1	1	1.0
2#Erwinia_amylovora_Ea1_00	Unassigned	Unassigned	Unassigned	14_0	Clustered	2	VC_14_0	2	0.0978	0.95430312	0.0934	1	1	1	1.0
2#Erwinia_amylovora_Ea1_95	Unassigned	Unassigned	Unassigned	4_0	Clustered	17	VC_4_0	17	0.5474	1.0	0.5474	1	1	1	1.0
2#Erwinia_amylovora_Ea1_97	Unassigned	Unassigned	Unassigned	17_0	Clustered	77	VC_17_0	77	0.9003	1.0	0.9003	1	1	1	1.0
2#Erwinia_amylovora_Ea1_98	Unassigned	Unassigned	Unassigned	4_0	Clustered	17	VC_4_0	17	0.5474	1.0	0.5474	1	1	1	1.0
2#Erwinia_amylovora_Ea266	Unassigned	Unassigned	Unassigned	2_0	Clustered	80	VC_2_0	80	0.7197	1.0	0.7197	1	1	1	1.0
2#Erwinia_amylovora_Ea29_7	Unassigned	Unassigned	Unassigned	2_0	Clustered	80	VC_2_0	80	0.7197	1.0	0.7197	1	1	1	1.0
2#Erwinia_amylovora_Ea2_95	Unassigned	Unassigned	Unassigned	17_0	Clustered	77	VC_17_0	77	0.9003	1.0	0.9003	1	1	1	1.0
2#Erwinia_amylovora_Ea2_97	Unassigned	Unassigned	Unassigned	26_0	Clustered	23	VC_26_0	23	0.7517	1.0	0.7517	6	2	2	0.9842
2#Erwinia_amylovora_Ea315_1	Unassigned	Unassigned	Unassigned	7_0	Clustered	111	VC_7_0	111	0.9935	1.0	0.9935	1	1	1	1.0
2#Erwinia_amylovora_Ea321	Unassigned	Unassigned	Unassigned	2_0	Clustered	80	VC_2_0	80	0.7197	1.0	0.7197	1	1	1	1.0
2#Erwinia_amylovora_Ea367	Unassigned	Unassigned	Unassigned	2_0	Clustered	80	VC_2_0	80	0.7197	1.0	0.7197	1	1	1	1.0
2#Erwinia_amylovora_Ea3_97	Unassigned	Unassigned	Unassigned	4_0	Clustered	17	VC_4_0	17	0.5474	1.0	0.5474	1	1	1	1.0
2#Erwinia_amylovora_Ea3a_H1_II	Unassigned	Unassigned	Unassigned	2_0	Clustered	80	VC_2_0	80	0.7197	1.0	0.7197	1	1	1	1.0
2#Erwinia_amylovora_Ea433	Unassigned	Unassigned	Unassigned	7_0	Clustered	111	VC_7_0	111	0.9935	1.0	0.9935	1	1	1	1.0
2#Erwinia_amylovora_Ea435	Unassigned	Unassigned	Unassigned	7_0	Clustered	111	VC_7_0	111	0.9935	1.0	0.9935	1	1	1	1.0
2#Erwinia_amylovora_Ea440	Unassigned	Unassigned	Unassigned	7_0	Clustered	111	VC_7_0	111	0.9935	1.0	0.9935	1	1	1	1.0
2#Erwinia_amylovora_Ea464	Unassigned	Unassigned	Unassigned	2_0	Clustered	80	VC_2_0	80	0.7197	1.0	0.7197	1	1	1	1.0
2#Erwinia_amylovora_Ea4_96	Unassigned	Unassigned	Unassigned	17_0	Clustered	77	VC_17_0	77	0.9003	1.0	0.9003	1	1	1	1.0
2#Erwinia_amylovora_Ea4_97	Unassigned	Unassigned	Unassigned	7_0	Clustered	111	VC_7_0	111	0.9935	1.0	0.9935	1	1	1	1.0
2#Erwinia_amylovora_Ea5_97	Unassigned	Unassigned	Unassigned	7_0	Clustered	111	VC_7_0	111	0.9935	1.0	0.9935	1	1	1	1.0
2#Erwinia_amylovora_Ea644	Unassigned	Unassigned	Unassigned	17_0	Clustered	77	VC_17_0	77	0.9003	1.0	0.9003	1	1	1	1.0
2#Erwinia_amylovora_Ea650	Unassigned	Unassigned	Unassigned	2_0	Clustered	80	VC_2_0	80	0.7197	1.0	0.7197	1	1	1	1.0
2#Erwinia_amylovora_Ea6_4	Unassigned	Unassigned	Unassigned	7_0	Clustered	111	VC_7_0	111	0.9935	1.0	0.9935	1	1	1	1.0
2#Erwinia_amylovora_Ea6_96	Unassigned	Unassigned	Unassigned	17_0	Clustered	77	VC_17_0	77	0.9003	1.0	0.9003	1	1	1	1.0
2#Erwinia_amylovora_Ea6_97	Unassigned	Unassigned	Unassigned	7_0	Clustered	111	VC_7_0	111	0.9935	1.0	0.9935	1	1	1	1.0
2#Erwinia_amylovora_Ea7_96	Unassigned	Unassigned	Unassigned	4_0	Clustered	17	VC_4_0	17	0.5474	1.0	0.5474	1	1	1	1.0
2#Erwinia_amylovora_Ea8_96	Unassigned	Unassigned	Unassigned	6_0	Clustered	16	VC_6_0	16	0.5086	1.0	0.5086	1	1	1	0.9833
2#Erwinia_amylovora_Ea92_1_1	Unassigned	Unassigned	Unassigned	2_0	Clustered	80	VC_2_0	80	0.7197	1.0	0.7197	1	1	1	1.0
2#Erwinia_amylovora_Ea92_1_2	Unassigned	Unassigned	Unassigned	2_0	Clustered	80	VC_2_0	80	0.7197	1.0	0.7197	1	1	1	1.0
2#Erwinia_amylovora_EaB_110	Unassigned	Unassigned	Unassigned	7_0	Clustered	111	VC_7_0	111	0.9935	1.0	0.9935	1	1	1	1.0
2#Erwinia_amylovora_EaD_7	Unassigned	Unassigned	Unassigned	7_0	Clustered	111	VC_7_0	111	0.9935	1.0	0.9935	1	1	1	1.0
2#Erwinia_amylovora_EaG5	Unassigned	Unassigned	Unassigned	2_0	Clustered	80	VC_2_0	80	0.7197	1.0	0.7197	1	1	1	1.0
2#Erwinia_amylovora_EaIF	Unassigned	Unassigned	Unassigned	7_0	Clustered	111	VC_7_0	111	0.9935	1.0	0.9935	1	1	1	1.0
2#Erwinia_amylovora_EaLevo2	Unassigned	Unassigned	Unassigned	12_0	Clustered	7	VC_12_0	7	0.8081	0.99999938	0.8081	1	1	1	1.0
2#Erwinia_amylovora_FB_20	Unassigned	Unassigned	Unassigned	7_0	Clustered	111	VC_7_0	111	0.9935	1.0	0.9935	1	1	1	1.0
2#Erwinia_amylovora_FB_207	Unassigned	Unassigned	Unassigned	7_0	Clustered	111	VC_7_0	111	0.9935	1.0	0.9935	1	1	1	1.0
2#Erwinia_amylovora_FB_307	Unassigned	Unassigned	Unassigned	7_0	Clustered	111	VC_7_0	111	0.9935	1.0	0.9935	1	1	1	1.0
2#Erwinia_amylovora_FB_86	Unassigned	Unassigned	Unassigned	7_0	Clustered	111	VC_7_0	111	0.9935	1.0	0.9935	1	1	1	1.0
2#Erwinia_amylovora_Fb_97b	Unassigned	Unassigned	Unassigned	7_0	Clustered	111	VC_7_0	111	0.9935	1.0	0.9935	1	1	1	1.0
2#Erwinia_amylovora_IH_3_1	Unassigned	Unassigned	Unassigned	0_0	Clustered	3	VC_0_0	3	0.0211	0.99861865	0.0211	1	1	1	1.0
2#Erwinia_amylovora_IVIA2303	Unassigned	Unassigned	Unassigned	2_0	Clustered	80	VC_2_0	80	0.7197	1.0	0.7197	1	1	1	1.0
2#Erwinia_amylovora_LA472	Unassigned	Unassigned	Unassigned	7_0	Clustered	111	VC_7_0	111	0.9935	1.0	0.9935	1	1	1	1.0
2#Erwinia_amylovora_LA635	Unassigned	Unassigned	Unassigned	7_0	Clustered	111	VC_7_0	111	0.9935	1.0	0.9935	1	1	1	1.0
2#Erwinia_amylovora_LA636	Unassigned	Unassigned	Unassigned	7_0	Clustered	111	VC_7_0	111	0.9935	1.0	0.9935	1	1	1	1.0
2#Erwinia_amylovora_LA637	Unassigned	Unassigned	Unassigned	7_0	Clustered	111	VC_7_0	111	0.9935	1.0	0.9935	1	1	1	1.0
2#Erwinia_amylovora_MAGFLF_2	Unassigned	Unassigned	Unassigned	7_0	Clustered	111	VC_7_0	111	0.9935	1.0	0.9935	1	1	1	1.0
2#Erwinia_amylovora_MANB02_1	Unassigned	Unassigned	Unassigned	7_0	Clustered	111	VC_7_0	111	0.9935	1.0	0.9935	1	1	1	1.0
2#Erwinia_amylovora_MASHBO	Unassigned	Unassigned	Unassigned	5_0	Clustered	79	VC_5_0	79	0.9351	1.0	0.9351	1	1	1	1.0
2#Erwinia_amylovora_MLI181_18	Unassigned	Unassigned	Unassigned	7_0	Clustered	111	VC_7_0	111	0.9935	1.0	0.9935	1	1	1	1.0
2#Erwinia_amylovora_MLI200_18	Unassigned	Unassigned	Unassigned	2_0	Clustered	80	VC_2_0	80	0.7197	1.0	0.7197	1	1	1	1.0
2#Erwinia_amylovora_MLI217_18	Unassigned	Unassigned	Unassigned	2_0	Clustered	80	VC_2_0	80	0.7197	1.0	0.7197	1	1	1	1.0
2#Erwinia_amylovora_MLI90_17	Unassigned	Unassigned	Unassigned	7_0	Clustered	111	VC_7_0	111	0.9935	1.0	0.9935	1	1	1	1.0
2#Erwinia_amylovora_NHSB01_1	Unassigned	Unassigned	Unassigned	2_0	Clustered	80	VC_2_0	80	0.7197	1.0	0.7197	1	1	1	1.0
2#Erwinia_amylovora_NHWL02_2	Unassigned	Unassigned	Unassigned	2_0	Clustered	80	VC_2_0	80	0.7197	1.0	0.7197	1	1	1	1.0
2#Erwinia_amylovora_O_RG_21	Unassigned	Unassigned	Unassigned	2_0	Clustered	80	VC_2_0	80	0.7197	1.0	0.7197	1	1	1	1.0
2#Erwinia_amylovora_P_C_3b	Unassigned	Unassigned	Unassigned	7_0	Clustered	111	VC_7_0	111	0.9935	1.0	0.9935	1	1	1	1.0
2#Erwinia_amylovora_RISTBO01_2	Unassigned	Unassigned	Unassigned	7_0	Clustered	111	VC_7_0	111	0.9935	1.0	0.9935	1	1	1	1.0
2#Erwinia_amylovora_TS3238	Unassigned	Unassigned	Unassigned	7_0	Clustered	111	VC_7_0	111	0.9935	1.0	0.9935	1	1	1	1.0
2#Erwinia_amylovora_UPN527	Unassigned	Unassigned	Unassigned	5_0	Clustered	79	VC_5_0	79	0.9351	1.0	0.9351	1	1	1	1.0
2#Erwinia_amylovora_UT5P4	Unassigned	Unassigned	Unassigned	2_0	Clustered	80	VC_2_0	80	0.7197	1.0	0.7197	1	1	1	1.0
2#Erwinia_amylovora_VTBL01_1	Unassigned	Unassigned	Unassigned	2_0	Clustered	80	VC_2_0	80	0.7197	1.0	0.7197	1	1	1	1.0
2#Erwinia_amylovora_VTDMSF02	Unassigned	Unassigned	Unassigned	7_0	Clustered	111	VC_7_0	111	0.9935	1.0	0.9935	1	1	1	1.0
2#Erwinia_amylovora_WSDA87_73	Unassigned	Unassigned	Unassigned	2_0	Clustered	80	VC_2_0	80	0.7197	1.0	0.7197	1	1	1	1.0
2#Erwinia_aphidicola_isolate_Bi13	Unassigned	Unassigned	Unassigned	13_1	Clustered/Singleton	1	VC_13_1	1	0.0	1.0	0.0	1	1	1	1.0
2#Erwinia_bacterium_CMYE1	Unassigned	Unassigned	Unassigned	36_0	Clustered	6	VC_36_0	6	0.1966	0.99998807	0.1966	2	2	2	0.6
2#Erwinia_billingiae_Eb661	Unassigned	Unassigned	Unassigned	27_0	Clustered	15	VC_27_0	15	0.3014	1.0	0.3014	2	2	2	1.0
2#Erwinia_billingiae_MYb121	Unassigned	Unassigned	Unassigned	17_0	Clustered	77	VC_17_0	77	0.9003	1.0	0.9003	1	1	1	1.0
2#Erwinia_billingiae_PBb	Unassigned	Unassigned	Unassigned	63_0	Clustered	6	VC_63_0	6	0.6393	0.99914155	0.6388	1	1	1	1.0
2#Erwinia_billingiae_TH88	Unassigned	Unassigned	Unassigned	13_0	Clustered	10	VC_13_0	10	0.3102	1.0	0.3102	1	1	1	0.9333
2#Erwinia_billingiae_isolate_UBA5038	Unassigned	Unassigned	Unassigned	17_0	Clustered	77	VC_17_0	77	0.9003	1.0	0.9003	1	1	1	1.0
2#Erwinia_dacicola_Oroville	Unassigned	Unassigned	Unassigned	74_0	Clustered	4	VC_74_0	4	0.2535	0.99826033	253	1	1	1	1.0
2#Erwinia_endophytica_A41C3	Unassigned	Unassigned	Unassigned	36_0	Clustered	6	VC_36_0	6	0.1966	0.99998807	0.1966	2	2	2	0.6
2#Erwinia_gerundensis_AR	Unassigned	Unassigned	Unassigned	51_0	Clustered	2	VC_51_0	2	0.5091	0.76024994	387	1	1	1	1.0
2#Erwinia_gerundensis_Eg13_2	Unassigned	Unassigned	Unassigned	49_0	Clustered	12	VC_49_0	12	449	1.0	449	1	1	1	1.0
2#Erwinia_gerundensis_Eg13_3	Unassigned	Unassigned	Unassigned	49_0	Clustered	12	VC_49_0	12	449	1.0	449	1	1	1	1.0
2#Erwinia_iniecta_B120	Unassigned	Unassigned	Unassigned	17_0	Clustered	77	VC_17_0	77	0.9003	1.0	0.9003	1	1	1	1.0
2#Erwinia_iniecta_B149	Unassigned	Unassigned	Unassigned	17_0	Clustered	77	VC_17_0	77	0.9003	1.0	0.9003	1	1	1	1.0
2#Erwinia_mallotivora_BT_MARDI	Unassigned	Unassigned	Unassigned	27_0	Clustered	15	VC_27_0	15	0.3014	1.0	0.3014	2	2	2	1.0
2#Erwinia_oleae_DAPP_PG531	Unassigned	Unassigned	Unassigned	73_0	Clustered	4	VC_73_0	4	1.0	1.0	1.0	1	1	1	1.0
2#Erwinia_persicina_B64	Unassigned	Unassigned	Unassigned	36_1	Clustered/Singleton	1	VC_36_1	1	0.0	1.0	0.0	1	1	1	1.0
2#Erwinia_persicina_CFBP13732_CFBP13732001	Unassigned	Unassigned	Unassigned	116_0	Clustered	2	VC_116_0	2	0.6566	0.86822376	0.5701	1	1	1	1.0
2#Erwinia_persicina_CFBP8767_CFBP8767001	Unassigned	Unassigned	Unassigned	116_0	Clustered	2	VC_116_0	2	0.6566	0.86822376	0.5701	1	1	1	1.0
2#Erwinia_persicina_CFBP8795_CFBP879501	Unassigned	Unassigned	Unassigned	41_0	Clustered	5	VC_41_0	5	0.7152	0.99999752	0.7152	1	1	1	1.0
2#Erwinia_persicina_CFBP8797_CFBP879701	Unassigned	Unassigned	Unassigned	17_0	Clustered	77	VC_17_0	77	0.9003	1.0	0.9003	1	1	1	1.0
2#Erwinia_persicina_DOAB1061_DOAB1061	Unassigned	Unassigned	Unassigned	63_0	Clustered	6	VC_63_0	6	0.6393	0.99914155	0.6388	1	1	1	1.0
2#Erwinia_persicina_NBRC_102418_DNA	Unassigned	Unassigned	Unassigned	28_0	Clustered	20	VC_28_0	20	609	1.0	609	1	1	1	1.0
2#Erwinia_piriflorinigrans_CFBP_5888	Unassigned	Unassigned	Unassigned	17_0	Clustered	77	VC_17_0	77	0.9003	1.0	0.9003	1	1	1	1.0
2#Erwinia_psidii_IBSBF_435	Unassigned	Unassigned	Unassigned	26_0	Clustered	23	VC_26_0	23	0.7517	1.0	0.7517	6	2	2	0.9842
2#Erwinia_pyrifoliae_DSM_12163	Unassigned	Unassigned	Unassigned	67_0	Clustered	7	VC_67_0	7	0.4453	0.99999809	0.4453	1	1	1	1.0
2#Erwinia_pyrifoliae_Ep1_96	Unassigned	Unassigned	Unassigned	67_0	Clustered	7	VC_67_0	7	0.4453	0.99999809	0.4453	1	1	1	1.0
2#Erwinia_pyrifoliae_YKB12328	Unassigned	Unassigned	Unassigned	67_0	Clustered	7	VC_67_0	7	0.4453	0.99999809	0.4453	1	1	1	1.0
2#Erwinia_rhapontici_BIGb0435_Ga0304803	Unassigned	Unassigned	Unassigned	28_0	Clustered	20	VC_28_0	20	609	1.0	609	1	1	1	1.0
2#Erwinia_rhapontici_BY21311	Unassigned	Unassigned	Unassigned	28_0	Clustered	20	VC_28_0	20	609	1.0	609	1	1	1	1.0
2#Erwinia_rhapontici_CGMCC16978	Unassigned	Unassigned	Unassigned	47_0	Clustered	13	VC_47_0	13	0.7006	1.0	0.7006	2	2	2	0.9872
2#Erwinia_rhapontici_H1	Unassigned	Unassigned	Unassigned	13_0	Clustered	10	VC_13_0	10	0.3102	1.0	0.3102	1	1	1	0.9333
2#Erwinia_rhapontici_MAFF_311153	Unassigned	Unassigned	Unassigned	17_0	Clustered	77	VC_17_0	77	0.9003	1.0	0.9003	1	1	1	1.0
2#Erwinia_rhapontici_MAFF_311154	Unassigned	Unassigned	Unassigned	73_0	Clustered	4	VC_73_0	4	1.0	1.0	1.0	1	1	1	1.0
2#Erwinia_rhapontici_WS3235_Ga0466830	Unassigned	Unassigned	Unassigned	117_0	Clustered	2	VC_117_0	2	1.0	1.0	1.0	1	1	1	1.0
2#Erwinia_sp_198	Unassigned	Unassigned	Unassigned	29_0	Clustered	32	VC_29_0	32	0.5208	1.0	0.5208	6	2	2	1.0
2#Erwinia_sp_E602	Unassigned	Unassigned	Unassigned	47_0	Clustered	13	VC_47_0	13	0.7006	1.0	0.7006	2	2	2	0.9872
2#Erwinia_sp_EM595_EM595	Unassigned	Unassigned	Unassigned	29_0	Clustered	32	VC_29_0	32	0.5208	1.0	0.5208	6	2	2	1.0
2#Erwinia_sp_Ejp617	Unassigned	Unassigned	Unassigned	6_0	Clustered	16	VC_6_0	16	0.5086	1.0	0.5086	1	1	1	0.9833
2#Erwinia_sp_ErVv1_Ervv1fasta	Unassigned	Unassigned	Unassigned	49_0	Clustered	12	VC_49_0	12	449	1.0	449	1	1	1	1.0
2#Erwinia_sp_J780	Unassigned	Unassigned	Unassigned	36_3	Clustered/Singleton	1	VC_36_3	1	0.0	1.0	0.0	1	1	1	1.0
2#Erwinia_sp_JH02	Unassigned	Unassigned	Unassigned	70_0	Clustered	2	VC_70_0	2	0.0935	0.85162136	0.0797	1	1	1	1.0
2#Erwinia_sp_JUb26_Ga0304838	Unassigned	Unassigned	Unassigned	17_0	Clustered	77	VC_17_0	77	0.9003	1.0	0.9003	1	1	1	1.0
2#Erwinia_sp_Leaf53	Unassigned	Unassigned	Unassigned	29_0	Clustered	32	VC_29_0	32	0.5208	1.0	0.5208	6	2	2	1.0
2#Erwinia_sp_OAMSP11	Unassigned	Unassigned	Unassigned	17_0	Clustered	77	VC_17_0	77	0.9003	1.0	0.9003	1	1	1	1.0
2#Erwinia_sp_OLCASP19	Unassigned	Unassigned	Unassigned	80_0	Clustered	6	VC_80_0	6	846	1.0	846	1	1	1	1.0
2#Erwinia_sp_OLFS4	Unassigned	Unassigned	Unassigned	80_0	Clustered	6	VC_80_0	6	846	1.0	846	1	1	1	1.0
2#Erwinia_sp_OLMDSP33	Unassigned	Unassigned	Unassigned	17_0	Clustered	77	VC_17_0	77	0.9003	1.0	0.9003	1	1	1	1.0
2#Erwinia_sp_OLMTSP26	Unassigned	Unassigned	Unassigned	80_0	Clustered	6	VC_80_0	6	846	1.0	846	1	1	1	1.0
2#Erwinia_sp_OLSSP12	Unassigned	Unassigned	Unassigned	98_0	Clustered	7	VC_98_0	7	0.7613	1.0	0.7613	1	1	1	1.0
2#Erwinia_sp_OLTSP20	Unassigned	Unassigned	Unassigned	17_0	Clustered	77	VC_17_0	77	0.9003	1.0	0.9003	1	1	1	1.0
2#Erwinia_sp_QL_Z3	Unassigned	Unassigned	Unassigned	49_0	Clustered	12	VC_49_0	12	449	1.0	449	1	1	1	1.0
2#Erwinia_sp_S43	Unassigned	Unassigned	Unassigned	36_0	Clustered	6	VC_36_0	6	0.1966	0.99998807	0.1966	2	2	2	0.6
2#Erwinia_tasmaniensis_ET1_99	Unassigned	Unassigned	Unassigned	17_0	Clustered	77	VC_17_0	77	0.9003	1.0	0.9003	1	1	1	1.0
2#Erwinia_toletana_DAPP_PG_735	Unassigned	Unassigned	Unassigned	29_0	Clustered	32	VC_29_0	32	0.5208	1.0	0.5208	6	2	2	1.0
2#Erwinia_toletana_WS4403_Ga0466831	Unassigned	Unassigned	Unassigned	47_0	Clustered	13	VC_47_0	13	0.7006	1.0	0.7006	2	2	2	0.9872
2#Erwinia_tracheiphila_BHKY	Unassigned	Unassigned	Unassigned	119_0	Clustered	2	VC_119_0	2	0.8516	0.72985431	0.6216	1	1	1	1.0
2#Erwinia_tracheiphila_BuffGH	Unassigned	Unassigned	Unassigned	119_0	Clustered	2	VC_119_0	2	0.8516	0.72985431	0.6216	1	1	1	1.0
2#Erwinia_tracheiphila_MDCuke	Unassigned	Unassigned	Unassigned	120_0	Clustered	2	VC_120_0	2	1.0	1.0	1.0	1	1	1	1.0
2#Erwinia_tracheiphila_SCR3	Unassigned	Unassigned	Unassigned	120_0	Clustered	2	VC_120_0	2	1.0	1.0	1.0	1	1	1	1.0
2#Erwinia_typographi_M043b	Unassigned	Unassigned	Unassigned	27_0	Clustered	15	VC_27_0	15	0.3014	1.0	0.3014	2	2	2	1.0
2#Pantoea_agglomerans_FDAARGOS_1447	Unassigned	Unassigned	Unassigned	17_0	Clustered	77	VC_17_0	77	0.9003	1.0	0.9003	1	1	1	1.0
2#Pantoea_ananatis_PA13	Unassigned	Unassigned	Unassigned	27_0	Clustered	15	VC_27_0	15	0.3014	1.0	0.3014	2	2	2	1.0
20#Erwinia_tracheiphila_BHKY	Unassigned	Unassigned	Unassigned	26_0	Clustered	23	VC_26_0	23	0.7517	1.0	0.7517	6	2	2	0.9842
20#Erwinia_tracheiphila_BuffGH	Unassigned	Unassigned	Unassigned	46_0	Clustered	5	VC_46_0	5	0.2803	0.99999332	0.2803	1	1	1	1.0
20#Erwinia_tracheiphila_MDCuke	Unassigned	Unassigned	Unassigned	112_0	Clustered	2	VC_112_0	2	0.9659	0.72985431	705	1	1	1	1.0
20#Erwinia_tracheiphila_PSU_1	Unassigned	Unassigned	Unassigned	46_0	Clustered	5	VC_46_0	5	0.2803	0.99999332	0.2803	1	1	1	1.0
20#Erwinia_tracheiphila_SCR3	Unassigned	Unassigned	Unassigned	112_0	Clustered	2	VC_112_0	2	0.9659	0.72985431	705	1	1	1	1.0
21#Erwinia_tracheiphila_BHKY	Unassigned	Unassigned	Unassigned	89_0	Clustered	5	VC_89_0	5	0.6638	0.99999937	0.6638	1	1	1	1.0
21#Erwinia_tracheiphila_BuffGH	Unassigned	Unassigned	Unassigned	83_0	Clustered	13	VC_83_0	13	0.8428	1.0	0.8428	2	2	2	1.0
21#Erwinia_tracheiphila_MDCuke	Unassigned	Unassigned	Unassigned	46_0	Clustered	5	VC_46_0	5	0.2803	0.99999332	0.2803	1	1	1	1.0
21#Erwinia_tracheiphila_SCR3	Unassigned	Unassigned	Unassigned	46_0	Clustered	5	VC_46_0	5	0.2803	0.99999332	0.2803	1	1	1	1.0
22#Erwinia_tracheiphila_BHKY	Unassigned	Unassigned	Unassigned	107_0	Clustered	2	VC_107_0	2	0.1954	0.95375357	0.1863	1	1	1	1.0
22#Erwinia_tracheiphila_BuffGH	Unassigned	Unassigned	Unassigned	26_0	Clustered	23	VC_26_0	23	0.7517	1.0	0.7517	6	2	2	0.9842
22#Erwinia_tracheiphila_MDCuke	Unassigned	Unassigned	Unassigned	15_1	Clustered	2	VC_15_1	2	0.1257	0.95612599	0.1202	1	1	1	1.0
22#Erwinia_tracheiphila_PSU_1	Unassigned	Unassigned	Unassigned	26_0	Clustered	23	VC_26_0	23	0.7517	1.0	0.7517	6	2	2	0.9842
22#Erwinia_tracheiphila_SCR3	Unassigned	Unassigned	Unassigned	15_1	Clustered	2	VC_15_1	2	0.1257	0.95612599	0.1202	1	1	1	1.0
23#Erwinia_tracheiphila_BHKY	Unassigned	Unassigned	Unassigned	103_0	Clustered	2	VC_103_0	2	496	0.94489191	0.4687	1	1	1	1.0
23#Erwinia_tracheiphila_BuffGH	Unassigned	Unassigned	Unassigned	89_0	Clustered	5	VC_89_0	5	0.6638	0.99999937	0.6638	1	1	1	1.0
23#Erwinia_tracheiphila_MDCuke	Unassigned	Unassigned	Unassigned	113_0	Clustered	4	VC_113_0	4	898	0.9989706	0.8971	1	1	1	1.0
23#Erwinia_tracheiphila_SCR3	Unassigned	Unassigned	Unassigned	113_0	Clustered	4	VC_113_0	4	898	0.9989706	0.8971	1	1	1	1.0
24#Erwinia_tracheiphila_BuffGH	Unassigned	Unassigned	Unassigned	107_0	Clustered	2	VC_107_0	2	0.1954	0.95375357	0.1863	1	1	1	1.0
24#Erwinia_tracheiphila_MDCuke	Unassigned	Unassigned	Unassigned	99_0	Clustered	2	VC_99_0	2	0.1873	0.95379831	0.1786	1	1	1	1.0
24#Erwinia_tracheiphila_SCR3	Unassigned	Unassigned	Unassigned	99_0	Clustered	2	VC_99_0	2	0.1873	0.95379831	0.1786	1	1	1	1.0
25#Erwinia_tracheiphila_BHKY	Unassigned	Unassigned	Unassigned	104_0	Clustered	4	VC_104_0	4	0.5047	0.99997623	0.5047	1	1	1	1.0
25#Erwinia_tracheiphila_BuffGH	Unassigned	Unassigned	Unassigned	103_0	Clustered	2	VC_103_0	2	496	0.94489191	0.4687	1	1	1	1.0
25#Erwinia_tracheiphila_MDCuke	Unassigned	Unassigned	Unassigned	31_0	Clustered	21	VC_31_0	21	0.9045	1.0	0.9045	11	2	2	1.0
25#Erwinia_tracheiphila_SCR3	Unassigned	Unassigned	Unassigned	31_0	Clustered	21	VC_31_0	21	0.9045	1.0	0.9045	11	2	2	1.0
26#Erwinia_tracheiphila_BHKY	Unassigned	Unassigned	Unassigned	92_0	Clustered	4	VC_92_0	4	0.2584	0.99997282	0.2584	1	1	1	1.0
26#Erwinia_tracheiphila_MDCuke	Unassigned	Unassigned	Unassigned	110_0	Clustered	4	VC_110_0	4	0.4912	0.99781366	0.4901	1	1	1	1.0
26#Erwinia_tracheiphila_SCR3	Unassigned	Unassigned	Unassigned	110_0	Clustered	4	VC_110_0	4	0.4912	0.99781366	0.4901	1	1	1	1.0
27#Erwinia_tracheiphila_BHKY	Unassigned	Unassigned	Unassigned	38_0	Clustered	3	VC_38_0	3	0.3212	0.9982427	0.3207	1	1	1	1.0
27#Erwinia_tracheiphila_BuffGH	Unassigned	Unassigned	Unassigned	104_0	Clustered	4	VC_104_0	4	0.5047	0.99997623	0.5047	1	1	1	1.0
27#Erwinia_tracheiphila_MDCuke	Unassigned	Unassigned	Unassigned	68_0	Clustered	5	VC_68_0	5	0.5396	0.99999992	0.5396	1	1	1	1.0
27#Erwinia_tracheiphila_SCR3	Unassigned	Unassigned	Unassigned	68_0	Clustered	5	VC_68_0	5	0.5396	0.99999992	0.5396	1	1	1	1.0
28#Erwinia_tracheiphila_BHKY	Unassigned	Unassigned	Unassigned	102_0	Clustered	5	VC_102_0	5	0.6463	0.9999996	0.6463	1	1	1	1.0
28#Erwinia_tracheiphila_BuffGH	Unassigned	Unassigned	Unassigned	92_0	Clustered	4	VC_92_0	4	0.2584	0.99997282	0.2584	1	1	1	1.0
29#Erwinia_tracheiphila_BHKY	Unassigned	Unassigned	Unassigned	91_0	Clustered	5	VC_91_0	5	0.2865	0.99999597	0.2865	1	1	1	1.0
29#Erwinia_tracheiphila_BuffGH	Unassigned	Unassigned	Unassigned	38_0	Clustered	3	VC_38_0	3	0.3212	0.9982427	0.3207	1	1	1	1.0
29#Erwinia_tracheiphila_MDCuke	Unassigned	Unassigned	Unassigned	100_0	Clustered	2	VC_100_0	2	0.3782	0.93990229	0.3554	1	1	1	1.0
29#Erwinia_tracheiphila_SCR3	Unassigned	Unassigned	Unassigned	100_0	Clustered	2	VC_100_0	2	0.3782	0.93990229	0.3554	1	1	1	1.0
3#Erwinia_amylovora_11_7	Unassigned	Unassigned	Unassigned	5_0	Clustered	79	VC_5_0	79	0.9351	1.0	0.9351	1	1	1	1.0
3#Erwinia_amylovora_1279	Unassigned	Unassigned	Unassigned	7_0	Clustered	111	VC_7_0	111	0.9935	1.0	0.9935	1	1	1	1.0
3#Erwinia_amylovora_1400_1	Unassigned	Unassigned	Unassigned	5_0	Clustered	79	VC_5_0	79	0.9351	1.0	0.9351	1	1	1	1.0
3#Erwinia_amylovora_1476	Unassigned	Unassigned	Unassigned	7_0	Clustered	111	VC_7_0	111	0.9935	1.0	0.9935	1	1	1	1.0
3#Erwinia_amylovora_1480_3	Unassigned	Unassigned	Unassigned	7_0	Clustered	111	VC_7_0	111	0.9935	1.0	0.9935	1	1	1	1.0
3#Erwinia_amylovora_1486	Unassigned	Unassigned	Unassigned	7_0	Clustered	111	VC_7_0	111	0.9935	1.0	0.9935	1	1	1	1.0
3#Erwinia_amylovora_1619	Unassigned	Unassigned	Unassigned	5_0	Clustered	79	VC_5_0	79	0.9351	1.0	0.9351	1	1	1	1.0
3#Erwinia_amylovora_1668	Unassigned	Unassigned	Unassigned	2_0	Clustered	80	VC_2_0	80	0.7197	1.0	0.7197	1	1	1	1.0
3#Erwinia_amylovora_1686	Unassigned	Unassigned	Unassigned	7_0	Clustered	111	VC_7_0	111	0.9935	1.0	0.9935	1	1	1	1.0
3#Erwinia_amylovora_1_2	Unassigned	Unassigned	Unassigned	123_0	Clustered	3	VC_123_0	3	1.0	0.0	0.0	1	1	1	1.0
3#Erwinia_amylovora_20070245	Unassigned	Unassigned	Unassigned	5_0	Clustered	79	VC_5_0	79	0.9351	1.0	0.9351	1	1	1	1.0
3#Erwinia_amylovora_20070270	Unassigned	Unassigned	Unassigned	5_0	Clustered	79	VC_5_0	79	0.9351	1.0	0.9351	1	1	1	1.0
3#Erwinia_amylovora_241_07	Unassigned	Unassigned	Unassigned	7_0	Clustered	111	VC_7_0	111	0.9935	1.0	0.9935	1	1	1	1.0
3#Erwinia_amylovora_2570	Unassigned	Unassigned	Unassigned	5_0	Clustered	79	VC_5_0	79	0.9351	1.0	0.9351	1	1	1	1.0
3#Erwinia_amylovora_32_10	Unassigned	Unassigned	Unassigned	5_0	Clustered	79	VC_5_0	79	0.9351	1.0	0.9351	1	1	1	1.0
3#Erwinia_amylovora_3446_1	Unassigned	Unassigned	Unassigned	7_0	Clustered	111	VC_7_0	111	0.9935	1.0	0.9935	1	1	1	1.0
3#Erwinia_amylovora_39_I_II	Unassigned	Unassigned	Unassigned	5_0	Clustered	79	VC_5_0	79	0.9351	1.0	0.9351	1	1	1	1.0
3#Erwinia_amylovora_46_4_2	Unassigned	Unassigned	Unassigned	5_0	Clustered	79	VC_5_0	79	0.9351	1.0	0.9351	1	1	1	1.0
3#Erwinia_amylovora_ATCC_49946	Unassigned	Unassigned	Unassigned	5_0	Clustered	79	VC_5_0	79	0.9351	1.0	0.9351	1	1	1	1.0
3#Erwinia_amylovora_CA3R	Unassigned	Unassigned	Unassigned	12_0	Clustered	7	VC_12_0	7	0.8081	0.99999938	0.8081	1	1	1	1.0
3#Erwinia_amylovora_CFBP_1232	Unassigned	Unassigned	Unassigned	5_0	Clustered	79	VC_5_0	79	0.9351	1.0	0.9351	1	1	1	1.0
3#Erwinia_amylovora_CTBT1_1	Unassigned	Unassigned	Unassigned	5_0	Clustered	79	VC_5_0	79	0.9351	1.0	0.9351	1	1	1	1.0
3#Erwinia_amylovora_CTBT3_1	Unassigned	Unassigned	Unassigned	5_0	Clustered	79	VC_5_0	79	0.9351	1.0	0.9351	1	1	1	1.0
3#Erwinia_amylovora_CTMF03_1	Unassigned	Unassigned	Unassigned	7_0	Clustered	111	VC_7_0	111	0.9935	1.0	0.9935	1	1	1	1.0
3#Erwinia_amylovora_CTST01_1	Unassigned	Unassigned	Unassigned	7_0	Clustered	111	VC_7_0	111	0.9935	1.0	0.9935	1	1	1	1.0
3#Erwinia_amylovora_E2005A	Unassigned	Unassigned	Unassigned	5_0	Clustered	79	VC_5_0	79	0.9351	1.0	0.9351	1	1	1	1.0
3#Erwinia_amylovora_E2006P	Unassigned	Unassigned	Unassigned	5_0	Clustered	79	VC_5_0	79	0.9351	1.0	0.9351	1	1	1	1.0
3#Erwinia_amylovora_EA110	Unassigned	Unassigned	Unassigned	7_0	Clustered	111	VC_7_0	111	0.9935	1.0	0.9935	1	1	1	1.0
3#Erwinia_amylovora_E_2	Unassigned	Unassigned	Unassigned	5_0	Clustered	79	VC_5_0	79	0.9351	1.0	0.9351	1	1	1	1.0
3#Erwinia_amylovora_Ea04_03	Unassigned	Unassigned	Unassigned	4_0	Clustered	17	VC_4_0	17	0.5474	1.0	0.5474	1	1	1	1.0
3#Erwinia_amylovora_Ea116_5_29	Unassigned	Unassigned	Unassigned	5_0	Clustered	79	VC_5_0	79	0.9351	1.0	0.9351	1	1	1	1.0
3#Erwinia_amylovora_Ea1189	Unassigned	Unassigned	Unassigned	5_0	Clustered	79	VC_5_0	79	0.9351	1.0	0.9351	1	1	1	1.0
3#Erwinia_amylovora_Ea160_4_51	Unassigned	Unassigned	Unassigned	0_0	Clustered	3	VC_0_0	3	0.0211	0.99861865	0.0211	1	1	1	1.0
3#Erwinia_amylovora_Ea1_00	Unassigned	Unassigned	Unassigned	4_0	Clustered	17	VC_4_0	17	0.5474	1.0	0.5474	1	1	1	1.0
3#Erwinia_amylovora_Ea1_97	Unassigned	Unassigned	Unassigned	4_0	Clustered	17	VC_4_0	17	0.5474	1.0	0.5474	1	1	1	1.0
3#Erwinia_amylovora_Ea266	Unassigned	Unassigned	Unassigned	5_0	Clustered	79	VC_5_0	79	0.9351	1.0	0.9351	1	1	1	1.0
3#Erwinia_amylovora_Ea29_7	Unassigned	Unassigned	Unassigned	5_0	Clustered	79	VC_5_0	79	0.9351	1.0	0.9351	1	1	1	1.0
3#Erwinia_amylovora_Ea2_97	Unassigned	Unassigned	Unassigned	4_0	Clustered	17	VC_4_0	17	0.5474	1.0	0.5474	1	1	1	1.0
3#Erwinia_amylovora_Ea315_1	Unassigned	Unassigned	Unassigned	5_0	Clustered	79	VC_5_0	79	0.9351	1.0	0.9351	1	1	1	1.0
3#Erwinia_amylovora_Ea321	Unassigned	Unassigned	Unassigned	7_0	Clustered	111	VC_7_0	111	0.9935	1.0	0.9935	1	1	1	1.0
3#Erwinia_amylovora_Ea356	Unassigned	Unassigned	Unassigned	5_0	Clustered	79	VC_5_0	79	0.9351	1.0	0.9351	1	1	1	1.0
3#Erwinia_amylovora_Ea3_97	Unassigned	Unassigned	Unassigned	17_0	Clustered	77	VC_17_0	77	0.9003	1.0	0.9003	1	1	1	1.0
3#Erwinia_amylovora_Ea3a_H1_II	Unassigned	Unassigned	Unassigned	7_0	Clustered	111	VC_7_0	111	0.9935	1.0	0.9935	1	1	1	1.0
3#Erwinia_amylovora_Ea433	Unassigned	Unassigned	Unassigned	5_0	Clustered	79	VC_5_0	79	0.9351	1.0	0.9351	1	1	1	1.0
3#Erwinia_amylovora_Ea435	Unassigned	Unassigned	Unassigned	5_0	Clustered	79	VC_5_0	79	0.9351	1.0	0.9351	1	1	1	1.0
3#Erwinia_amylovora_Ea4_96	Unassigned	Unassigned	Unassigned	26_0	Clustered	23	VC_26_0	23	0.7517	1.0	0.7517	6	2	2	0.9842
3#Erwinia_amylovora_Ea8_96	Unassigned	Unassigned	Unassigned	17_0	Clustered	77	VC_17_0	77	0.9003	1.0	0.9003	1	1	1	1.0
3#Erwinia_amylovora_EaD_7	Unassigned	Unassigned	Unassigned	5_0	Clustered	79	VC_5_0	79	0.9351	1.0	0.9351	1	1	1	1.0
3#Erwinia_amylovora_EaG5	Unassigned	Unassigned	Unassigned	7_0	Clustered	111	VC_7_0	111	0.9935	1.0	0.9935	1	1	1	1.0
3#Erwinia_amylovora_FB_20	Unassigned	Unassigned	Unassigned	5_0	Clustered	79	VC_5_0	79	0.9351	1.0	0.9351	1	1	1	1.0
3#Erwinia_amylovora_FB_207	Unassigned	Unassigned	Unassigned	5_0	Clustered	79	VC_5_0	79	0.9351	1.0	0.9351	1	1	1	1.0
3#Erwinia_amylovora_FB_307	Unassigned	Unassigned	Unassigned	5_0	Clustered	79	VC_5_0	79	0.9351	1.0	0.9351	1	1	1	1.0
3#Erwinia_amylovora_FB_86	Unassigned	Unassigned	Unassigned	5_0	Clustered	79	VC_5_0	79	0.9351	1.0	0.9351	1	1	1	1.0
3#Erwinia_amylovora_LA092	Unassigned	Unassigned	Unassigned	7_0	Clustered	111	VC_7_0	111	0.9935	1.0	0.9935	1	1	1	1.0
3#Erwinia_amylovora_MAGFLF_2	Unassigned	Unassigned	Unassigned	5_0	Clustered	79	VC_5_0	79	0.9351	1.0	0.9351	1	1	1	1.0
3#Erwinia_amylovora_MANB02_1	Unassigned	Unassigned	Unassigned	5_0	Clustered	79	VC_5_0	79	0.9351	1.0	0.9351	1	1	1	1.0
3#Erwinia_amylovora_MASHBO	Unassigned	Unassigned	Unassigned	7_0	Clustered	111	VC_7_0	111	0.9935	1.0	0.9935	1	1	1	1.0
3#Erwinia_amylovora_MLI181_18	Unassigned	Unassigned	Unassigned	5_0	Clustered	79	VC_5_0	79	0.9351	1.0	0.9351	1	1	1	1.0
3#Erwinia_amylovora_MLI200_18	Unassigned	Unassigned	Unassigned	7_0	Clustered	111	VC_7_0	111	0.9935	1.0	0.9935	1	1	1	1.0
3#Erwinia_amylovora_MLI217_18	Unassigned	Unassigned	Unassigned	5_0	Clustered	79	VC_5_0	79	0.9351	1.0	0.9351	1	1	1	1.0
3#Erwinia_amylovora_MLI90_17	Unassigned	Unassigned	Unassigned	5_0	Clustered	79	VC_5_0	79	0.9351	1.0	0.9351	1	1	1	1.0
3#Erwinia_amylovora_NHSB01_1	Unassigned	Unassigned	Unassigned	7_0	Clustered	111	VC_7_0	111	0.9935	1.0	0.9935	1	1	1	1.0
3#Erwinia_amylovora_NHWL02_2	Unassigned	Unassigned	Unassigned	7_0	Clustered	111	VC_7_0	111	0.9935	1.0	0.9935	1	1	1	1.0
3#Erwinia_amylovora_OR1	Unassigned	Unassigned	Unassigned	7_0	Clustered	111	VC_7_0	111	0.9935	1.0	0.9935	1	1	1	1.0
3#Erwinia_amylovora_OR6	Unassigned	Unassigned	Unassigned	7_0	Clustered	111	VC_7_0	111	0.9935	1.0	0.9935	1	1	1	1.0
3#Erwinia_amylovora_RISTBO01_2	Unassigned	Unassigned	Unassigned	5_0	Clustered	79	VC_5_0	79	0.9351	1.0	0.9351	1	1	1	1.0
3#Erwinia_amylovora_TS3238	Unassigned	Unassigned	Unassigned	5_0	Clustered	79	VC_5_0	79	0.9351	1.0	0.9351	1	1	1	1.0
3#Erwinia_amylovora_UT5P4	Unassigned	Unassigned	Unassigned	7_0	Clustered	111	VC_7_0	111	0.9935	1.0	0.9935	1	1	1	1.0
3#Erwinia_amylovora_VTBL01_1	Unassigned	Unassigned	Unassigned	7_0	Clustered	111	VC_7_0	111	0.9935	1.0	0.9935	1	1	1	1.0
3#Erwinia_amylovora_VTDMSF02	Unassigned	Unassigned	Unassigned	5_0	Clustered	79	VC_5_0	79	0.9351	1.0	0.9351	1	1	1	1.0
3#Erwinia_amylovora_WSDA87_73	Unassigned	Unassigned	Unassigned	7_0	Clustered	111	VC_7_0	111	0.9935	1.0	0.9935	1	1	1	1.0
3#Erwinia_aphidicola_JCM_21238	Unassigned	Unassigned	Unassigned	49_0	Clustered	12	VC_49_0	12	449	1.0	449	1	1	1	1.0
3#Erwinia_aphidicola_isolate_Bi13	Unassigned	Unassigned	Unassigned	17_0	Clustered	77	VC_17_0	77	0.9003	1.0	0.9003	1	1	1	1.0
3#Erwinia_billingiae_Eb661	Unassigned	Unassigned	Unassigned	101_0	Clustered	3	VC_101_0	3	0.3375	0.98069704	331	2	2	2	1.0
3#Erwinia_billingiae_PBb	Unassigned	Unassigned	Unassigned	27_0	Clustered	15	VC_27_0	15	0.3014	1.0	0.3014	2	2	2	1.0
3#Erwinia_billingiae_TH88	Unassigned	Unassigned	Unassigned	34_0	Clustered	2	VC_34_0	2	0.2271	0.9511748	216	1	1	1	1.0
3#Erwinia_billingiae_isolate_UBA5038	Unassigned	Unassigned	Unassigned	29_0	Clustered	32	VC_29_0	32	0.5208	1.0	0.5208	6	2	2	1.0
3#Erwinia_gerundensis_Eg31_2	Unassigned	Unassigned	Unassigned	49_0	Clustered	12	VC_49_0	12	449	1.0	449	1	1	1	1.0
3#Erwinia_persicina_CFBP1351100_0	Unassigned	Unassigned	Unassigned	17_0	Clustered	77	VC_17_0	77	0.9003	1.0	0.9003	1	1	1	1.0
3#Erwinia_persicina_CFBP13732_CFBP13732001	Unassigned	Unassigned	Unassigned	41_0	Clustered	5	VC_41_0	5	0.7152	0.99999752	0.7152	1	1	1	1.0
3#Erwinia_persicina_CFBP8767_CFBP8767001	Unassigned	Unassigned	Unassigned	41_0	Clustered	5	VC_41_0	5	0.7152	0.99999752	0.7152	1	1	1	1.0
3#Erwinia_persicina_CFBP8795_CFBP879501	Unassigned	Unassigned	Unassigned	48_0	Clustered	2	VC_48_0	2	0.4469	0.9375332	419	1	1	1	1.0
3#Erwinia_persicina_CFBP8803_CFBP880301	Unassigned	Unassigned	Unassigned	17_0	Clustered	77	VC_17_0	77	0.9003	1.0	0.9003	1	1	1	1.0
3#Erwinia_persicina_Cp2	Unassigned	Unassigned	Unassigned	17_0	Clustered	77	VC_17_0	77	0.9003	1.0	0.9003	1	1	1	1.0
3#Erwinia_persicina_DOAB1061_DOAB1061	Unassigned	Unassigned	Unassigned	28_0	Clustered	20	VC_28_0	20	609	1.0	609	1	1	1	1.0
3#Erwinia_persicina_NBRC_102418_DNA	Unassigned	Unassigned	Unassigned	63_0	Clustered	6	VC_63_0	6	0.6393	0.99914155	0.6388	1	1	1	1.0
3#Erwinia_piriflorinigrans_CFBP_5888	Unassigned	Unassigned	Unassigned	27_0	Clustered	15	VC_27_0	15	0.3014	1.0	0.3014	2	2	2	1.0
3#Erwinia_psidii_IBSBF_435	Unassigned	Unassigned	Unassigned	17_0	Clustered	77	VC_17_0	77	0.9003	1.0	0.9003	1	1	1	1.0
3#Erwinia_pyrifoliae_DSM_12163	Unassigned	Unassigned	Unassigned	17_0	Clustered	77	VC_17_0	77	0.9003	1.0	0.9003	1	1	1	1.0
3#Erwinia_pyrifoliae_Ep1_96	Unassigned	Unassigned	Unassigned	17_0	Clustered	77	VC_17_0	77	0.9003	1.0	0.9003	1	1	1	1.0
3#Erwinia_pyrifoliae_EpK1_15	Unassigned	Unassigned	Unassigned	16_0	Clustered	4	VC_16_0	4	0.2738	0.99998492	0.2738	1	1	1	1.0
3#Erwinia_pyrifoliae_YKB12328	Unassigned	Unassigned	Unassigned	17_0	Clustered	77	VC_17_0	77	0.9003	1.0	0.9003	1	1	1	1.0
3#Erwinia_rhapontici_BIGb0435_Ga0304803	Unassigned	Unassigned	Unassigned	70_0	Clustered	2	VC_70_0	2	0.0935	0.85162136	0.0797	1	1	1	1.0
3#Erwinia_rhapontici_BY21311	Unassigned	Unassigned	Unassigned	26_0	Clustered	23	VC_26_0	23	0.7517	1.0	0.7517	6	2	2	0.9842
3#Erwinia_rhapontici_CGMCC16978	Unassigned	Unassigned	Unassigned	17_0	Clustered	77	VC_17_0	77	0.9003	1.0	0.9003	1	1	1	1.0
3#Erwinia_rhapontici_H1	Unassigned	Unassigned	Unassigned	36_4	Clustered/Singleton	1	VC_36_4	1	0.0	1.0	0.0	1	1	1	1.0
3#Erwinia_rhapontici_MAFF_311153	Unassigned	Unassigned	Unassigned	28_0	Clustered	20	VC_28_0	20	609	1.0	609	1	1	1	1.0
3#Erwinia_rhapontici_MAFF_311154	Unassigned	Unassigned	Unassigned	47_0	Clustered	13	VC_47_0	13	0.7006	1.0	0.7006	2	2	2	0.9872
3#Erwinia_rhapontici_WS3235_Ga0466830	Unassigned	Unassigned	Unassigned	47_0	Clustered	13	VC_47_0	13	0.7006	1.0	0.7006	2	2	2	0.9872
3#Erwinia_sp_198	Unassigned	Unassigned	Unassigned	49_0	Clustered	12	VC_49_0	12	449	1.0	449	1	1	1	1.0
3#Erwinia_sp_E602	Unassigned	Unassigned	Unassigned	26_0	Clustered	23	VC_26_0	23	0.7517	1.0	0.7517	6	2	2	0.9842
3#Erwinia_sp_EM595_EM595	Unassigned	Unassigned	Unassigned	51_0	Clustered	2	VC_51_0	2	0.5091	0.76024994	387	1	1	1	1.0
3#Erwinia_sp_JH02	Unassigned	Unassigned	Unassigned	31_0	Clustered	21	VC_31_0	21	0.9045	1.0	0.9045	11	2	2	1.0
3#Erwinia_sp_Leaf53	Unassigned	Unassigned	Unassigned	13_0	Clustered	10	VC_13_0	10	0.3102	1.0	0.3102	1	1	1	0.9333
3#Erwinia_sp_OAMSP11	Unassigned	Unassigned	Unassigned	80_0	Clustered	6	VC_80_0	6	846	1.0	846	1	1	1	1.0
3#Erwinia_sp_OLCASP19	Unassigned	Unassigned	Unassigned	98_0	Clustered	7	VC_98_0	7	0.7613	1.0	0.7613	1	1	1	1.0
3#Erwinia_sp_OLFS4	Unassigned	Unassigned	Unassigned	98_0	Clustered	7	VC_98_0	7	0.7613	1.0	0.7613	1	1	1	1.0
3#Erwinia_sp_OLMDSP33	Unassigned	Unassigned	Unassigned	80_0	Clustered	6	VC_80_0	6	846	1.0	846	1	1	1	1.0
3#Erwinia_sp_OLMTSP26	Unassigned	Unassigned	Unassigned	98_0	Clustered	7	VC_98_0	7	0.7613	1.0	0.7613	1	1	1	1.0
3#Erwinia_sp_OLSSP12	Unassigned	Unassigned	Unassigned	78_0	Clustered	6	VC_78_0	6	0.6337	1.0	0.6337	1	1	1	1.0
3#Erwinia_sp_OLTSP20	Unassigned	Unassigned	Unassigned	80_0	Clustered	6	VC_80_0	6	846	1.0	846	1	1	1	1.0
3#Erwinia_sp_QL_Z3	Unassigned	Unassigned	Unassigned	50_0	Clustered	2	VC_50_0	2	0.1114	0.94862012	0.1057	1	1	1	1.0
3#Erwinia_toletana_DAPP_PG_735	Unassigned	Unassigned	Unassigned	124_0	Clustered	2	VC_124_0	2	1.0	1.0	1.0	1	1	1	1.0
3#Erwinia_toletana_WS4403_Ga0466831	Unassigned	Unassigned	Unassigned	17_0	Clustered	77	VC_17_0	77	0.9003	1.0	0.9003	1	1	1	1.0
3#Erwinia_tracheiphila_BuffGH	Unassigned	Unassigned	Unassigned	115_0	Clustered	2	VC_115_0	2	0.6252	0.72985431	0.4563	1	1	1	1.0
3#Erwinia_tracheiphila_MDCuke	Unassigned	Unassigned	Unassigned	105_0	Clustered	2	VC_105_0	2	0.5537	0.92766926	0.5136	1	1	1	1.0
3#Erwinia_tracheiphila_SCR3	Unassigned	Unassigned	Unassigned	105_0	Clustered	2	VC_105_0	2	0.5537	0.92766926	0.5136	1	1	1	1.0
3#Erwinia_typographi_M043b	Unassigned	Unassigned	Unassigned	87_0	Clustered	4	VC_87_0	4	0.3024	0.99998121	0.3024	1	1	1	1.0
30#Erwinia_tracheiphila_BuffGH	Unassigned	Unassigned	Unassigned	102_0	Clustered	5	VC_102_0	5	0.6463	0.9999996	0.6463	1	1	1	1.0
30#Erwinia_tracheiphila_MDCuke	Unassigned	Unassigned	Unassigned	83_0	Clustered	13	VC_83_0	13	0.8428	1.0	0.8428	2	2	2	1.0
30#Erwinia_tracheiphila_SCR3	Unassigned	Unassigned	Unassigned	97_0	Clustered	3	VC_97_0	3	0.7311	0.99822585	0.7298	1	1	1	1.0
31#Erwinia_tracheiphila_BuffGH	Unassigned	Unassigned	Unassigned	91_0	Clustered	5	VC_91_0	5	0.2865	0.99999597	0.2865	1	1	1	1.0
31#Erwinia_tracheiphila_MDCuke	Unassigned	Unassigned	Unassigned	121_0	Clustered	4	VC_121_0	4	0.9261	0.99346908	0.92	1	1	1	1.0
31#Erwinia_tracheiphila_SCR3	Unassigned	Unassigned	Unassigned	83_0	Clustered	13	VC_83_0	13	0.8428	1.0	0.8428	2	2	2	1.0
32#Erwinia_tracheiphila_BHKY	Unassigned	Unassigned	Unassigned	84_0	Clustered	2	VC_84_0	2	0.1295	0.94924033	0.1229	1	1	1	1.0
32#Erwinia_tracheiphila_MDCuke	Unassigned	Unassigned	Unassigned	9_0	Clustered	4	VC_9_0	4	0.6489	0.99995005	0.6489	1	1	1	1.0
32#Erwinia_tracheiphila_SCR3	Unassigned	Unassigned	Unassigned	121_0	Clustered	4	VC_121_0	4	0.9261	0.99346908	0.92	1	1	1	1.0
33#Erwinia_tracheiphila_BHKY	Unassigned	Unassigned	Unassigned	126_0	Clustered	2	VC_126_0	2	1.0	1.0	1.0	1	1	1	1.0
33#Erwinia_tracheiphila_MDCuke	Unassigned	Unassigned	Unassigned	127_0	Clustered	2	VC_127_0	2	0.9215	0.76024994	0.7006	1	1	1	1.0
33#Erwinia_tracheiphila_SCR3	Unassigned	Unassigned	Unassigned	9_0	Clustered	4	VC_9_0	4	0.6489	0.99995005	0.6489	1	1	1	1.0
34#Erwinia_tracheiphila_BHKY	Unassigned	Unassigned	Unassigned	6_0	Clustered	16	VC_6_0	16	0.5086	1.0	0.5086	1	1	1	0.9833
34#Erwinia_tracheiphila_BuffGH	Unassigned	Unassigned	Unassigned	84_0	Clustered	2	VC_84_0	2	0.1295	0.94924033	0.1229	1	1	1	1.0
34#Erwinia_tracheiphila_MDCuke	Unassigned	Unassigned	Unassigned	128_0	Clustered	2	VC_128_0	2	0.9596	0.76024994	0.7296	1	1	1	1.0
34#Erwinia_tracheiphila_SCR3	Unassigned	Unassigned	Unassigned	127_0	Clustered	2	VC_127_0	2	0.9215	0.76024994	0.7006	1	1	1	1.0
35#Erwinia_tracheiphila_BHKY	Unassigned	Unassigned	Unassigned	30_0	Clustered	2	VC_30_0	2	0.1666	0.95522036	0.1592	1	1	1	1.0
35#Erwinia_tracheiphila_BuffGH	Unassigned	Unassigned	Unassigned	126_0	Clustered	2	VC_126_0	2	1.0	1.0	1.0	1	1	1	1.0
35#Erwinia_tracheiphila_MDCuke	Unassigned	Unassigned	Unassigned	8_0	Clustered	3	VC_8_0	3	0.3406	0.99862082	0.3402	1	1	1	1.0
35#Erwinia_tracheiphila_SCR3	Unassigned	Unassigned	Unassigned	128_0	Clustered	2	VC_128_0	2	0.9596	0.76024994	0.7296	1	1	1	1.0
36#Erwinia_tracheiphila_BHKY	Unassigned	Unassigned	Unassigned	121_0	Clustered	4	VC_121_0	4	0.9261	0.99346908	0.92	1	1	1	1.0
36#Erwinia_tracheiphila_BuffGH	Unassigned	Unassigned	Unassigned	6_0	Clustered	16	VC_6_0	16	0.5086	1.0	0.5086	1	1	1	0.9833
37#Erwinia_tracheiphila_BHKY	Unassigned	Unassigned	Unassigned	42_0	Clustered	3	VC_42_0	3	0.3392	0.99831886	0.3386	1	1	1	1.0
37#Erwinia_tracheiphila_BuffGH	Unassigned	Unassigned	Unassigned	30_0	Clustered	2	VC_30_0	2	0.1666	0.95522036	0.1592	1	1	1	1.0
37#Erwinia_tracheiphila_MDCuke	Unassigned	Unassigned	Unassigned	125_0	Clustered	4	VC_125_0	4	0.9782	0.99318376	0.9716	1	1	1	1.0
37#Erwinia_tracheiphila_SCR3	Unassigned	Unassigned	Unassigned	125_0	Clustered	4	VC_125_0	4	0.9782	0.99318376	0.9716	1	1	1	1.0
38#Erwinia_tracheiphila_BHKY	Unassigned	Unassigned	Unassigned	115_0	Clustered	2	VC_115_0	2	0.6252	0.72985431	0.4563	1	1	1	1.0
38#Erwinia_tracheiphila_BuffGH	Unassigned	Unassigned	Unassigned	121_0	Clustered	4	VC_121_0	4	0.9261	0.99346908	0.92	1	1	1	1.0
38#Erwinia_tracheiphila_MDCuke	Unassigned	Unassigned	Unassigned	83_0	Clustered	13	VC_83_0	13	0.8428	1.0	0.8428	2	2	2	1.0
39#Erwinia_tracheiphila_BHKY	Unassigned	Unassigned	Unassigned	125_0	Clustered	4	VC_125_0	4	0.9782	0.99318376	0.9716	1	1	1	1.0
39#Erwinia_tracheiphila_BuffGH	Unassigned	Unassigned	Unassigned	9_0	Clustered	4	VC_9_0	4	0.6489	0.99995005	0.6489	1	1	1	1.0
39#Erwinia_tracheiphila_SCR3	Unassigned	Unassigned	Unassigned	83_0	Clustered	13	VC_83_0	13	0.8428	1.0	0.8428	2	2	2	1.0
4#Erwinia_amylovora_11_7	Unassigned	Unassigned	Unassigned	123_0	Clustered	3	VC_123_0	3	1.0	0.0	0.0	1	1	1	1.0
4#Erwinia_amylovora_32_10	Unassigned	Unassigned	Unassigned	123_0	Clustered	3	VC_123_0	3	1.0	0.0	0.0	1	1	1	1.0
4#Erwinia_amylovora_33_1	Unassigned	Unassigned	Unassigned	7_0	Clustered	111	VC_7_0	111	0.9935	1.0	0.9935	1	1	1	1.0
4#Erwinia_amylovora_3446_1	Unassigned	Unassigned	Unassigned	12_0	Clustered	7	VC_12_0	7	0.8081	0.99999938	0.8081	1	1	1	1.0
4#Erwinia_amylovora_E2006P	Unassigned	Unassigned	Unassigned	4_0	Clustered	17	VC_4_0	17	0.5474	1.0	0.5474	1	1	1	1.0
4#Erwinia_amylovora_Ea01_03	Unassigned	Unassigned	Unassigned	7_0	Clustered	111	VC_7_0	111	0.9935	1.0	0.9935	1	1	1	1.0
4#Erwinia_amylovora_Ea160_4_51	Unassigned	Unassigned	Unassigned	5_0	Clustered	79	VC_5_0	79	0.9351	1.0	0.9351	1	1	1	1.0
4#Erwinia_amylovora_Ea1_00	Unassigned	Unassigned	Unassigned	2_0	Clustered	80	VC_2_0	80	0.7197	1.0	0.7197	1	1	1	1.0
4#Erwinia_amylovora_Ea6_96	Unassigned	Unassigned	Unassigned	4_0	Clustered	17	VC_4_0	17	0.5474	1.0	0.5474	1	1	1	1.0
4#Erwinia_bacterium_CMYE1	Unassigned	Unassigned	Unassigned	17_0	Clustered	77	VC_17_0	77	0.9003	1.0	0.9003	1	1	1	1.0
4#Erwinia_billingiae_PBb	Unassigned	Unassigned	Unassigned	17_0	Clustered	77	VC_17_0	77	0.9003	1.0	0.9003	1	1	1	1.0
4#Erwinia_billingiae_TH88	Unassigned	Unassigned	Unassigned	27_0	Clustered	15	VC_27_0	15	0.3014	1.0	0.3014	2	2	2	1.0
4#Erwinia_dacicola_Oroville	Unassigned	Unassigned	Unassigned	39_0	Clustered	5	VC_39_0	5	0.8527	0.99999789	0.8527	2	2	2	1.0
4#Erwinia_endophytica_A41C3	Unassigned	Unassigned	Unassigned	22_0	Clustered	2	VC_22_0	2	0.1137	0.94489191	0.1074	1	1	1	1.0
4#Erwinia_persicina_CFBP1351100_0	Unassigned	Unassigned	Unassigned	61_0	Clustered	2	VC_61_0	2	0.1979	0.5	99	1	1	1	1.0
4#Erwinia_persicina_CFBP13732_CFBP13732001	Unassigned	Unassigned	Unassigned	96_0	Clustered	3	VC_96_0	3	0.9485	0.93592672	0.8877	1	1	1	1.0
4#Erwinia_persicina_CFBP8767_CFBP8767001	Unassigned	Unassigned	Unassigned	96_0	Clustered	3	VC_96_0	3	0.9485	0.93592672	0.8877	1	1	1	1.0
4#Erwinia_persicina_CFBP8795_CFBP879501	Unassigned	Unassigned	Unassigned	28_0	Clustered	20	VC_28_0	20	609	1.0	609	1	1	1	1.0
4#Erwinia_persicina_CFBP8803_CFBP880301	Unassigned	Unassigned	Unassigned	79_0	Clustered	2	VC_79_0	2	0.1123	0.94384779	106	1	1	1	1.0
4#Erwinia_persicina_Cp2	Unassigned	Unassigned	Unassigned	29_0	Clustered	32	VC_29_0	32	0.5208	1.0	0.5208	6	2	2	1.0
4#Erwinia_persicina_DOAB1061_DOAB1061	Unassigned	Unassigned	Unassigned	13_0	Clustered	10	VC_13_0	10	0.3102	1.0	0.3102	1	1	1	0.9333
4#Erwinia_persicina_NBRC_102418_DNA	Unassigned	Unassigned	Unassigned	13_0	Clustered	10	VC_13_0	10	0.3102	1.0	0.3102	1	1	1	0.9333
4#Erwinia_psidii_IBSBF_435	Unassigned	Unassigned	Unassigned	29_0	Clustered	32	VC_29_0	32	0.5208	1.0	0.5208	6	2	2	1.0
4#Erwinia_pyrifoliae_DSM_12163	Unassigned	Unassigned	Unassigned	6_0	Clustered	16	VC_6_0	16	0.5086	1.0	0.5086	1	1	1	0.9833
4#Erwinia_pyrifoliae_Ep1_96	Unassigned	Unassigned	Unassigned	6_0	Clustered	16	VC_6_0	16	0.5086	1.0	0.5086	1	1	1	0.9833
4#Erwinia_pyrifoliae_EpK1_15	Unassigned	Unassigned	Unassigned	6_0	Clustered	16	VC_6_0	16	0.5086	1.0	0.5086	1	1	1	0.9833
4#Erwinia_pyrifoliae_YKB12328	Unassigned	Unassigned	Unassigned	6_0	Clustered	16	VC_6_0	16	0.5086	1.0	0.5086	1	1	1	0.9833
4#Erwinia_rhapontici_BIGb0435_Ga0304803	Unassigned	Unassigned	Unassigned	17_0	Clustered	77	VC_17_0	77	0.9003	1.0	0.9003	1	1	1	1.0
4#Erwinia_rhapontici_CGMCC16978	Unassigned	Unassigned	Unassigned	44_0	Clustered	2	VC_44_0	2	0.3458	0.95342681	0.3297	1	1	1	1.0
4#Erwinia_rhapontici_H1	Unassigned	Unassigned	Unassigned	26_0	Clustered	23	VC_26_0	23	0.7517	1.0	0.7517	6	2	2	0.9842
4#Erwinia_rhapontici_MAFF_311154	Unassigned	Unassigned	Unassigned	17_0	Clustered	77	VC_17_0	77	0.9003	1.0	0.9003	1	1	1	1.0
4#Erwinia_rhapontici_WS3235_Ga0466830	Unassigned	Unassigned	Unassigned	29_0	Clustered	32	VC_29_0	32	0.5208	1.0	0.5208	6	2	2	1.0
4#Erwinia_sp_198	Unassigned	Unassigned	Unassigned	17_0	Clustered	77	VC_17_0	77	0.9003	1.0	0.9003	1	1	1	1.0
4#Erwinia_sp_9145_FA91DRAFT	Unassigned	Unassigned	Unassigned	17_0	Clustered	77	VC_17_0	77	0.9003	1.0	0.9003	1	1	1	1.0
4#Erwinia_sp_EM595_EM595	Unassigned	Unassigned	Unassigned	17_0	Clustered	77	VC_17_0	77	0.9003	1.0	0.9003	1	1	1	1.0
4#Erwinia_sp_JH02	Unassigned	Unassigned	Unassigned	73_0	Clustered	4	VC_73_0	4	1.0	1.0	1.0	1	1	1	1.0
4#Erwinia_sp_OAMSP11	Unassigned	Unassigned	Unassigned	98_0	Clustered	7	VC_98_0	7	0.7613	1.0	0.7613	1	1	1	1.0
4#Erwinia_sp_OLCASP19	Unassigned	Unassigned	Unassigned	78_0	Clustered	6	VC_78_0	6	0.6337	1.0	0.6337	1	1	1	1.0
4#Erwinia_sp_OLFS4	Unassigned	Unassigned	Unassigned	78_0	Clustered	6	VC_78_0	6	0.6337	1.0	0.6337	1	1	1	1.0
4#Erwinia_sp_OLMDSP33	Unassigned	Unassigned	Unassigned	98_0	Clustered	7	VC_98_0	7	0.7613	1.0	0.7613	1	1	1	1.0
4#Erwinia_sp_OLMTSP26	Unassigned	Unassigned	Unassigned	78_0	Clustered	6	VC_78_0	6	0.6337	1.0	0.6337	1	1	1	1.0
4#Erwinia_sp_OLSSP12	Unassigned	Unassigned	Unassigned	6_0	Clustered	16	VC_6_0	16	0.5086	1.0	0.5086	1	1	1	0.9833
4#Erwinia_sp_OLTSP20	Unassigned	Unassigned	Unassigned	98_0	Clustered	7	VC_98_0	7	0.7613	1.0	0.7613	1	1	1	1.0
4#Erwinia_sp_QL_Z3	Unassigned	Unassigned	Unassigned	13_0	Clustered	10	VC_13_0	10	0.3102	1.0	0.3102	1	1	1	0.9333
4#Erwinia_toletana_DAPP_PG_735	Unassigned	Unassigned	Unassigned	17_0	Clustered	77	VC_17_0	77	0.9003	1.0	0.9003	1	1	1	1.0
4#Erwinia_tracheiphila_BuffGH	Unassigned	Unassigned	Unassigned	42_0	Clustered	3	VC_42_0	3	0.3392	0.99831886	0.3386	1	1	1	1.0
4#Erwinia_tracheiphila_MDCuke	Unassigned	Unassigned	Unassigned	62_0	Clustered	2	VC_62_0	2	0.0999	0.95226825	0.0951	1	1	1	1.0
4#Erwinia_tracheiphila_PSU_1	Unassigned	Unassigned	Unassigned	102_0	Clustered	5	VC_102_0	5	0.6463	0.9999996	0.6463	1	1	1	1.0
4#Erwinia_tracheiphila_SCR3	Unassigned	Unassigned	Unassigned	62_0	Clustered	2	VC_62_0	2	0.0999	0.95226825	0.0951	1	1	1	1.0
4#Pantoea_ananatis_PA13	Unassigned	Unassigned	Unassigned	17_0	Clustered	77	VC_17_0	77	0.9003	1.0	0.9003	1	1	1	1.0
40#Erwinia_tracheiphila_BHKY	Unassigned	Unassigned	Unassigned	109_0	Clustered	3	VC_109_0	3	0.9869	0.81445332	0.8038	1	1	1	1.0
40#Erwinia_tracheiphila_BuffGH	Unassigned	Unassigned	Unassigned	125_0	Clustered	4	VC_125_0	4	0.9782	0.99318376	0.9716	1	1	1	1.0
40#Erwinia_tracheiphila_MDCuke	Unassigned	Unassigned	Unassigned	109_0	Clustered	3	VC_109_0	3	0.9869	0.81445332	0.8038	1	1	1	1.0
41#Erwinia_tracheiphila_BuffGH	Unassigned	Unassigned	Unassigned	109_0	Clustered	3	VC_109_0	3	0.9869	0.81445332	0.8038	1	1	1	1.0
41#Erwinia_tracheiphila_SCR3	Unassigned	Unassigned	Unassigned	47_0	Clustered	13	VC_47_0	13	0.7006	1.0	0.7006	2	2	2	0.9872
5#Erwinia_Erwinia_dacicola_IL	Unassigned	Unassigned	Unassigned	57_0	Clustered	9	VC_57_0	9	0.7272	1.0	0.7272	2	2	2	1.0
5#Erwinia_amylovora_E2006P	Unassigned	Unassigned	Unassigned	7_0	Clustered	111	VC_7_0	111	0.9935	1.0	0.9935	1	1	1	1.0
5#Erwinia_amylovora_Ea6_96	Unassigned	Unassigned	Unassigned	3_0	Clustered	5	VC_3_0	5	0.1226	0.99999997	0.1226	1	1	1	1.0
5#Erwinia_amylovora_Ea8_96	Unassigned	Unassigned	Unassigned	3_0	Clustered	5	VC_3_0	5	0.1226	0.99999997	0.1226	1	1	1	1.0
5#Erwinia_bacterium_CMYE1	Unassigned	Unassigned	Unassigned	47_0	Clustered	13	VC_47_0	13	0.7006	1.0	0.7006	2	2	2	0.9872
5#Erwinia_billingiae_Eb661	Unassigned	Unassigned	Unassigned	17_0	Clustered	77	VC_17_0	77	0.9003	1.0	0.9003	1	1	1	1.0
5#Erwinia_billingiae_TH88	Unassigned	Unassigned	Unassigned	75_0	Clustered	2	VC_75_0	2	0.0786	0.6365361	0.05	1	1	1	1.0
5#Erwinia_dacicola_Oroville	Unassigned	Unassigned	Unassigned	74_0	Clustered	4	VC_74_0	4	0.2535	0.99826033	253	1	1	1	1.0
5#Erwinia_endophytica_A41C3	Unassigned	Unassigned	Unassigned	22_0	Clustered	2	VC_22_0	2	0.1137	0.94489191	0.1074	1	1	1	1.0
5#Erwinia_gerundensis_Eg31_2	Unassigned	Unassigned	Unassigned	17_0	Clustered	77	VC_17_0	77	0.9003	1.0	0.9003	1	1	1	1.0
5#Erwinia_persicina_B64	Unassigned	Unassigned	Unassigned	28_0	Clustered	20	VC_28_0	20	609	1.0	609	1	1	1	1.0
5#Erwinia_persicina_CFBP1351100_0	Unassigned	Unassigned	Unassigned	41_0	Clustered	5	VC_41_0	5	0.7152	0.99999752	0.7152	1	1	1	1.0
5#Erwinia_persicina_CFBP8795_CFBP879501	Unassigned	Unassigned	Unassigned	19_0	Clustered	6	VC_19_0	6	0.3053	1.0	0.3053	1	1	1	1.0
5#Erwinia_persicina_Cp2	Unassigned	Unassigned	Unassigned	41_0	Clustered	5	VC_41_0	5	0.7152	0.99999752	0.7152	1	1	1	1.0
5#Erwinia_persicina_DOAB1061_DOAB1061	Unassigned	Unassigned	Unassigned	31_0	Clustered	21	VC_31_0	21	0.9045	1.0	0.9045	11	2	2	1.0
5#Erwinia_psidii_IBSBF_435	Unassigned	Unassigned	Unassigned	31_0	Clustered	21	VC_31_0	21	0.9045	1.0	0.9045	11	2	2	1.0
5#Erwinia_pyrifoliae_DSM_12163	Unassigned	Unassigned	Unassigned	16_0	Clustered	4	VC_16_0	4	0.2738	0.99998492	0.2738	1	1	1	1.0
5#Erwinia_pyrifoliae_Ep1_96	Unassigned	Unassigned	Unassigned	16_0	Clustered	4	VC_16_0	4	0.2738	0.99998492	0.2738	1	1	1	1.0
5#Erwinia_pyrifoliae_EpK1_15	Unassigned	Unassigned	Unassigned	17_0	Clustered	77	VC_17_0	77	0.9003	1.0	0.9003	1	1	1	1.0
5#Erwinia_pyrifoliae_YKB12328	Unassigned	Unassigned	Unassigned	16_0	Clustered	4	VC_16_0	4	0.2738	0.99998492	0.2738	1	1	1	1.0
5#Erwinia_rhapontici_BIGb0435_Ga0304803	Unassigned	Unassigned	Unassigned	26_0	Clustered	23	VC_26_0	23	0.7517	1.0	0.7517	6	2	2	0.9842
5#Erwinia_rhapontici_CGMCC16978	Unassigned	Unassigned	Unassigned	132_0	Clustered	2	VC_132_0	2	1.0	1.0	1.0	1	1	1	1.0
5#Erwinia_rhapontici_H1	Unassigned	Unassigned	Unassigned	28_0	Clustered	20	VC_28_0	20	609	1.0	609	1	1	1	1.0
5#Erwinia_rhapontici_MAFF_311154	Unassigned	Unassigned	Unassigned	28_0	Clustered	20	VC_28_0	20	609	1.0	609	1	1	1	1.0
5#Erwinia_rhapontici_WS3235_Ga0466830	Unassigned	Unassigned	Unassigned	132_0	Clustered	2	VC_132_0	2	1.0	1.0	1.0	1	1	1	1.0
5#Erwinia_sp_198	Unassigned	Unassigned	Unassigned	47_0	Clustered	13	VC_47_0	13	0.7006	1.0	0.7006	2	2	2	0.9872
5#Erwinia_sp_ErVv1_Ervv1fasta	Unassigned	Unassigned	Unassigned	47_0	Clustered	13	VC_47_0	13	0.7006	1.0	0.7006	2	2	2	0.9872
5#Erwinia_sp_JH02	Unassigned	Unassigned	Unassigned	17_0	Clustered	77	VC_17_0	77	0.9003	1.0	0.9003	1	1	1	1.0
5#Erwinia_sp_OAMSP11	Unassigned	Unassigned	Unassigned	78_0	Clustered	6	VC_78_0	6	0.6337	1.0	0.6337	1	1	1	1.0
5#Erwinia_sp_OLCASP19	Unassigned	Unassigned	Unassigned	81_0	Clustered	7	VC_81_0	7	0.5409	1.0	0.5409	1	1	1	1.0
5#Erwinia_sp_OLFS4	Unassigned	Unassigned	Unassigned	81_0	Clustered	7	VC_81_0	7	0.5409	1.0	0.5409	1	1	1	1.0
5#Erwinia_sp_OLMDSP33	Unassigned	Unassigned	Unassigned	78_0	Clustered	6	VC_78_0	6	0.6337	1.0	0.6337	1	1	1	1.0
5#Erwinia_sp_OLMTSP26	Unassigned	Unassigned	Unassigned	81_0	Clustered	7	VC_81_0	7	0.5409	1.0	0.5409	1	1	1	1.0
5#Erwinia_sp_OLSSP12	Unassigned	Unassigned	Unassigned	64_0	Clustered	7	VC_64_0	7	0.6184	1.0	0.6184	1	1	1	1.0
5#Erwinia_sp_OLTSP20	Unassigned	Unassigned	Unassigned	81_0	Clustered	7	VC_81_0	7	0.5409	1.0	0.5409	1	1	1	1.0
5#Erwinia_sp_S38	Unassigned	Unassigned	Unassigned	29_0	Clustered	32	VC_29_0	32	0.5208	1.0	0.5208	6	2	2	1.0
5#Erwinia_toletana_DAPP_PG_735	Unassigned	Unassigned	Unassigned	47_0	Clustered	13	VC_47_0	13	0.7006	1.0	0.7006	2	2	2	0.9872
5#Erwinia_toletana_WS4403_Ga0466831	Unassigned	Unassigned	Unassigned	54_0	Clustered	2	VC_54_0	2	0.7763	0.76024994	0.5902	1	1	1	1.0
5#Erwinia_tracheiphila_BHKY	Unassigned	Unassigned	Unassigned	8_0	Clustered	3	VC_8_0	3	0.3406	0.99862082	0.3402	1	1	1	1.0
5#Erwinia_tracheiphila_MDCuke	Unassigned	Unassigned	Unassigned	29_0	Clustered	32	VC_29_0	32	0.5208	1.0	0.5208	6	2	2	1.0
5#Erwinia_tracheiphila_PSU_1	Unassigned	Unassigned	Unassigned	91_0	Clustered	5	VC_91_0	5	0.2865	0.99999597	0.2865	1	1	1	1.0
5#Erwinia_tracheiphila_SCR3	Unassigned	Unassigned	Unassigned	29_0	Clustered	32	VC_29_0	32	0.5208	1.0	0.5208	6	2	2	1.0
5#Erwinia_typographi_M043b	Unassigned	Unassigned	Unassigned	17_0	Clustered	77	VC_17_0	77	0.9003	1.0	0.9003	1	1	1	1.0
5#Pantoea_ananatis_PA13	Unassigned	Unassigned	Unassigned	47_0	Clustered	13	VC_47_0	13	0.7006	1.0	0.7006	2	2	2	0.9872
6#Erwinia_Erwinia_dacicola_IL	Unassigned	Unassigned	Unassigned	74_0	Clustered	4	VC_74_0	4	0.2535	0.99826033	253	1	1	1	1.0
6#Erwinia_bacterium_CMYE1	Unassigned	Unassigned	Unassigned	31_0	Clustered	21	VC_31_0	21	0.9045	1.0	0.9045	11	2	2	1.0
6#Erwinia_billingiae_PBb	Unassigned	Unassigned	Unassigned	101_0	Clustered	3	VC_101_0	3	0.3375	0.98069704	331	2	2	2	1.0
6#Erwinia_endophytica_A41C3	Unassigned	Unassigned	Unassigned	17_0	Clustered	77	VC_17_0	77	0.9003	1.0	0.9003	1	1	1	1.0
6#Erwinia_persicina_CFBP1351100_0	Unassigned	Unassigned	Unassigned	28_0	Clustered	20	VC_28_0	20	609	1.0	609	1	1	1	1.0
6#Erwinia_persicina_CFBP8795_CFBP879501	Unassigned	Unassigned	Unassigned	69_0	Clustered	3	VC_69_0	3	0.1004	0.94549056	0.0949	1	1	1	1.0
6#Erwinia_persicina_Cp2	Unassigned	Unassigned	Unassigned	28_0	Clustered	20	VC_28_0	20	609	1.0	609	1	1	1	1.0
6#Erwinia_psidii_IBSBF_435	Unassigned	Unassigned	Unassigned	77_0	Clustered	2	VC_77_0	2	0.1517	0.91813282	0.1393	1	1	1	1.0
6#Erwinia_pyrifoliae_DSM_12163	Unassigned	Unassigned	Unassigned	66_0	Clustered	4	VC_66_0	4	1.0	1.0	1.0	1	1	1	1.0
6#Erwinia_pyrifoliae_Ep1_96	Unassigned	Unassigned	Unassigned	66_0	Clustered	4	VC_66_0	4	1.0	1.0	1.0	1	1	1	1.0
6#Erwinia_pyrifoliae_EpK1_15	Unassigned	Unassigned	Unassigned	67_0	Clustered	7	VC_67_0	7	0.4453	0.99999809	0.4453	1	1	1	1.0
6#Erwinia_pyrifoliae_YKB12328	Unassigned	Unassigned	Unassigned	66_0	Clustered	4	VC_66_0	4	1.0	1.0	1.0	1	1	1	1.0
6#Erwinia_rhapontici_CGMCC16978	Unassigned	Unassigned	Unassigned	29_0	Clustered	32	VC_29_0	32	0.5208	1.0	0.5208	6	2	2	1.0
6#Erwinia_rhapontici_H1	Unassigned	Unassigned	Unassigned	17_0	Clustered	77	VC_17_0	77	0.9003	1.0	0.9003	1	1	1	1.0
6#Erwinia_rhapontici_MAFF_311154	Unassigned	Unassigned	Unassigned	63_0	Clustered	6	VC_63_0	6	0.6393	0.99914155	0.6388	1	1	1	1.0
6#Erwinia_rhapontici_WS3235_Ga0466830	Unassigned	Unassigned	Unassigned	44_0	Clustered	2	VC_44_0	2	0.3458	0.95342681	0.3297	1	1	1	1.0
6#Erwinia_sp_ErVv1_Ervv1fasta	Unassigned	Unassigned	Unassigned	17_0	Clustered	77	VC_17_0	77	0.9003	1.0	0.9003	1	1	1	1.0
6#Erwinia_sp_Leaf53	Unassigned	Unassigned	Unassigned	36_0	Clustered	6	VC_36_0	6	0.1966	0.99998807	0.1966	2	2	2	0.6
6#Erwinia_sp_OAMSP11	Unassigned	Unassigned	Unassigned	81_0	Clustered	7	VC_81_0	7	0.5409	1.0	0.5409	1	1	1	1.0
6#Erwinia_sp_OLCASP19	Unassigned	Unassigned	Unassigned	25_0	Clustered	4	VC_25_0	4	323	0.99998348	323	1	1	1	1.0
6#Erwinia_sp_OLFS4	Unassigned	Unassigned	Unassigned	6_0	Clustered	16	VC_6_0	16	0.5086	1.0	0.5086	1	1	1	0.9833
6#Erwinia_sp_OLMDSP33	Unassigned	Unassigned	Unassigned	81_0	Clustered	7	VC_81_0	7	0.5409	1.0	0.5409	1	1	1	1.0
6#Erwinia_sp_OLMTSP26	Unassigned	Unassigned	Unassigned	6_0	Clustered	16	VC_6_0	16	0.5086	1.0	0.5086	1	1	1	0.9833
6#Erwinia_sp_OLSSP12	Unassigned	Unassigned	Unassigned	81_0	Clustered	7	VC_81_0	7	0.5409	1.0	0.5409	1	1	1	1.0
6#Erwinia_sp_OLTSP20	Unassigned	Unassigned	Unassigned	6_0	Clustered	16	VC_6_0	16	0.5086	1.0	0.5086	1	1	1	0.9833
6#Erwinia_sp_QL_Z3	Unassigned	Unassigned	Unassigned	63_0	Clustered	6	VC_63_0	6	0.6393	0.99914155	0.6388	1	1	1	1.0
6#Erwinia_sp_S38	Unassigned	Unassigned	Unassigned	36_0	Clustered	6	VC_36_0	6	0.1966	0.99998807	0.1966	2	2	2	0.6
6#Erwinia_toletana_WS4403_Ga0466831	Unassigned	Unassigned	Unassigned	124_0	Clustered	2	VC_124_0	2	1.0	1.0	1.0	1	1	1	1.0
6#Erwinia_tracheiphila_BHKY	Unassigned	Unassigned	Unassigned	133_0	Clustered	2	VC_133_0	2	0.6979	0.86822376	606	1	1	1	1.0
6#Erwinia_tracheiphila_BuffGH	Unassigned	Unassigned	Unassigned	8_0	Clustered	3	VC_8_0	3	0.3406	0.99862082	0.3402	1	1	1	1.0
6#Erwinia_tracheiphila_PSU_1	Unassigned	Unassigned	Unassigned	91_0	Clustered	5	VC_91_0	5	0.2865	0.99999597	0.2865	1	1	1	1.0
6#Erwinia_typographi_M043b	Unassigned	Unassigned	Unassigned	67_0	Clustered	7	VC_67_0	7	0.4453	0.99999809	0.4453	1	1	1	1.0
7#Erwinia_billingiae_Eb661	Unassigned	Unassigned	Unassigned	50_0	Clustered	2	VC_50_0	2	0.1114	0.94862012	0.1057	1	1	1	1.0
7#Erwinia_persicina_CFBP8795_CFBP879501	Unassigned	Unassigned	Unassigned	17_0	Clustered	77	VC_17_0	77	0.9003	1.0	0.9003	1	1	1	1.0
7#Erwinia_pyrifoliae_DSM_12163	Unassigned	Unassigned	Unassigned	114_0	Clustered	2	VC_114_0	2	0.6539	0.92451884	0.6045	1	1	1	1.0
7#Erwinia_pyrifoliae_Ep1_96	Unassigned	Unassigned	Unassigned	114_0	Clustered	2	VC_114_0	2	0.6539	0.92451884	0.6045	1	1	1	1.0
7#Erwinia_pyrifoliae_EpK1_15	Unassigned	Unassigned	Unassigned	65_0	Clustered	4	VC_65_0	4	0.2879	0.99997326	0.2879	1	1	1	1.0
7#Erwinia_rhapontici_CGMCC16978	Unassigned	Unassigned	Unassigned	28_0	Clustered	20	VC_28_0	20	609	1.0	609	1	1	1	1.0
7#Erwinia_rhapontici_WS3235_Ga0466830	Unassigned	Unassigned	Unassigned	19_0	Clustered	6	VC_19_0	6	0.3053	1.0	0.3053	1	1	1	1.0
7#Erwinia_sp_ErVv1_Ervv1fasta	Unassigned	Unassigned	Unassigned	49_0	Clustered	12	VC_49_0	12	449	1.0	449	1	1	1	1.0
7#Erwinia_sp_JH02	Unassigned	Unassigned	Unassigned	28_0	Clustered	20	VC_28_0	20	609	1.0	609	1	1	1	1.0
7#Erwinia_sp_OAMSP11	Unassigned	Unassigned	Unassigned	6_0	Clustered	16	VC_6_0	16	0.5086	1.0	0.5086	1	1	1	0.9833
7#Erwinia_sp_OLCASP19	Unassigned	Unassigned	Unassigned	6_0	Clustered	16	VC_6_0	16	0.5086	1.0	0.5086	1	1	1	0.9833
7#Erwinia_sp_OLFS4	Unassigned	Unassigned	Unassigned	25_0	Clustered	4	VC_25_0	4	323	0.99998348	323	1	1	1	1.0
7#Erwinia_sp_OLMDSP33	Unassigned	Unassigned	Unassigned	6_0	Clustered	16	VC_6_0	16	0.5086	1.0	0.5086	1	1	1	0.9833
7#Erwinia_sp_OLMTSP26	Unassigned	Unassigned	Unassigned	25_0	Clustered	4	VC_25_0	4	323	0.99998348	323	1	1	1	1.0
7#Erwinia_sp_OLTSP20	Unassigned	Unassigned	Unassigned	64_0	Clustered	7	VC_64_0	7	0.6184	1.0	0.6184	1	1	1	1.0
7#Erwinia_sp_S38	Unassigned	Unassigned	Unassigned	69_0	Clustered	3	VC_69_0	3	0.1004	0.94549056	0.0949	1	1	1	1.0
7#Erwinia_tracheiphila_BHKY	Unassigned	Unassigned	Unassigned	90_0	Clustered	2	VC_90_0	2	0.2316	0.95325006	0.2208	1	1	1	1.0
7#Erwinia_tracheiphila_BuffGH	Unassigned	Unassigned	Unassigned	133_0	Clustered	2	VC_133_0	2	0.6979	0.86822376	606	1	1	1	1.0
7#Erwinia_tracheiphila_MDCuke	Unassigned	Unassigned	Unassigned	122_0	Clustered	2	VC_122_0	2	0.7702	0.91840661	0.7073	1	1	1	1.0
7#Erwinia_tracheiphila_SCR3	Unassigned	Unassigned	Unassigned	122_0	Clustered	2	VC_122_0	2	0.7702	0.91840661	0.7073	1	1	1	1.0
7#Erwinia_typographi_M043b	Unassigned	Unassigned	Unassigned	48_0	Clustered	2	VC_48_0	2	0.4469	0.9375332	419	1	1	1	1.0
8#Erwinia_Erwinia_dacicola_IL	Unassigned	Unassigned	Unassigned	86_0	Clustered	2	VC_86_0	2	0.1183	0.9420176	0.1115	1	1	1	1.0
8#Erwinia_billingiae_Eb661	Unassigned	Unassigned	Unassigned	63_0	Clustered	6	VC_63_0	6	0.6393	0.99914155	0.6388	1	1	1	1.0
8#Erwinia_persicina_CFBP8795_CFBP879501	Unassigned	Unassigned	Unassigned	49_0	Clustered	12	VC_49_0	12	449	1.0	449	1	1	1	1.0
8#Erwinia_rhapontici_CGMCC16978	Unassigned	Unassigned	Unassigned	117_0	Clustered	2	VC_117_0	2	1.0	1.0	1.0	1	1	1	1.0
8#Erwinia_rhapontici_WS3235_Ga0466830	Unassigned	Unassigned	Unassigned	17_0	Clustered	77	VC_17_0	77	0.9003	1.0	0.9003	1	1	1	1.0
8#Erwinia_sp_JH02	Unassigned	Unassigned	Unassigned	49_0	Clustered	12	VC_49_0	12	449	1.0	449	1	1	1	1.0
8#Erwinia_sp_OAMSP11	Unassigned	Unassigned	Unassigned	25_0	Clustered	4	VC_25_0	4	323	0.99998348	323	1	1	1	1.0
8#Erwinia_sp_OLCASP19	Unassigned	Unassigned	Unassigned	64_0	Clustered	7	VC_64_0	7	0.6184	1.0	0.6184	1	1	1	1.0
8#Erwinia_sp_OLFS4	Unassigned	Unassigned	Unassigned	64_0	Clustered	7	VC_64_0	7	0.6184	1.0	0.6184	1	1	1	1.0
8#Erwinia_sp_OLMTSP26	Unassigned	Unassigned	Unassigned	64_0	Clustered	7	VC_64_0	7	0.6184	1.0	0.6184	1	1	1	1.0
8#Erwinia_sp_S38	Unassigned	Unassigned	Unassigned	4_0	Clustered	17	VC_4_0	17	0.5474	1.0	0.5474	1	1	1	1.0
8#Erwinia_tracheiphila_BHKY	Unassigned	Unassigned	Unassigned	87_0	Clustered	4	VC_87_0	4	0.3024	0.99998121	0.3024	1	1	1	1.0
8#Erwinia_tracheiphila_BuffGH	Unassigned	Unassigned	Unassigned	90_0	Clustered	2	VC_90_0	2	0.2316	0.95325006	0.2208	1	1	1	1.0
8#Erwinia_tracheiphila_MDCuke	Unassigned	Unassigned	Unassigned	83_0	Clustered	13	VC_83_0	13	0.8428	1.0	0.8428	2	2	2	1.0
8#Erwinia_tracheiphila_SCR3	Unassigned	Unassigned	Unassigned	83_0	Clustered	13	VC_83_0	13	0.8428	1.0	0.8428	2	2	2	1.0
9#Erwinia_Erwinia_dacicola_IL	Unassigned	Unassigned	Unassigned	31_0	Clustered	21	VC_31_0	21	0.9045	1.0	0.9045	11	2	2	1.0
9#Erwinia_dacicola_Oroville	Unassigned	Unassigned	Unassigned	31_0	Clustered	21	VC_31_0	21	0.9045	1.0	0.9045	11	2	2	1.0
9#Erwinia_sp_JH02	Unassigned	Unassigned	Unassigned	26_0	Clustered	23	VC_26_0	23	0.7517	1.0	0.7517	6	2	2	0.9842
9#Erwinia_sp_OLFS4	Unassigned	Unassigned	Unassigned	82_0	Clustered	2	VC_82_0	2	0.7121	0.76024994	0.5414	1	1	1	1.0
9#Erwinia_tracheiphila_BHKY	Unassigned	Unassigned	Unassigned	83_0	Clustered	13	VC_83_0	13	0.8428	1.0	0.8428	2	2	2	1.0
9#Erwinia_tracheiphila_BuffGH	Unassigned	Unassigned	Unassigned	87_0	Clustered	4	VC_87_0	4	0.3024	0.99998121	0.3024	1	1	1	1.0
9#Erwinia_tracheiphila_PSU_1	Unassigned	Unassigned	Unassigned	42_0	Clustered	3	VC_42_0	3	0.3392	0.99831886	0.3386	1	1	1	1.0
AB002632	Tubulavirales	Inoviridae	Saetivirus	135_0	Clustered	2	VC_135_0	2	1.0	1.0	1.0	1	1	1	1.0
AB009866	Caudovirales	Siphoviridae	Peeveelvirus	136_0	Clustered	24	VC_136_0	24	0.4703	1.0	0.4703	2	1	1	0.7717
AB012574	Tubulavirales	Inoviridae	Villovirus	143_0	Clustered	7	VC_143_0	7	926	0.99986634	0.9259	2	1	1	1.0
AB043678	Tubulavirales	Inoviridae	Versovirus	142_0	Clustered	2	VC_142_0	2	0.3367	0.91941373	0.3096	1	1	1	1.0
AB043679	Tubulavirales	Inoviridae	Versovirus	142_0	Clustered	2	VC_142_0	2	0.3367	0.91941373	0.3096	1	1	1	1.0
AB044554	Caudovirales	Siphoviridae	Peeveelvirus	136_0	Clustered	24	VC_136_0	24	0.4703	1.0	0.4703	2	1	1	0.7717
AB045978	Caudovirales	Siphoviridae	Triavirus	137_0	Clustered	23	VC_137_0	23	0.6591	1.0	0.6591	1	1	1	1.0
AB063393	Halopanivirales	Matshushitaviridae	Hukuchivirus	148_0	Clustered	2	VC_148_0	2	1.0	1.0	1.0	1	1	1	1.0
AB231700	Caudovirales	Myoviridae	Fukuivirus	149_0	Clustered	2	VC_149_0	2	1.0	1.0	1.0	1	1	1	1.0
AB243556	Caudovirales	Siphoviridae	Peeveelvirus	136_0	Clustered	24	VC_136_0	24	0.4703	1.0	0.4703	2	1	1	0.7717
AB255436	Caudovirales	Podoviridae	Traversvirus	108_0	Clustered	21	VC_108_0	21	0.7299	1.0	0.7299	3	1	1	0.8667
AB259123	Tubulavirales	Inoviridae	Habenivirus	150_0	Clustered	6	VC_150_0	6	1.0	1.0	1.0	1	1	1	1.0
AB259124	Tubulavirales	Inoviridae	Restivirus	151_0	Clustered	4	VC_151_0	4	0.9538	0.99374885	0.9478	1	1	1	1.0
AB334720	Tubulavirales	Inoviridae	Inovirus	152_0	Clustered	12	VC_152_0	12	0.8841	1.0	0.8841	1	1	1	1.0
AB334721	Tubulavirales	Inoviridae	Inovirus	152_0	Clustered	12	VC_152_0	12	0.8841	1.0	0.8841	1	1	1	1.0
AB366653	Caudovirales	Myoviridae	Mieseafarmvirus	155_1	Clustered/Singleton	1	VC_155_1	1	0.0	1.0	0.0	1	1	1	1.0
AB370205	Caudovirales	Siphoviridae	Dubowvirus	138_1	Clustered	19	VC_138_1	19	0.3014	1.0	0.3014	2	1	1	0.9766
AB370268	Caudovirales	Siphoviridae	Phietavirus	138_0	Clustered	27	VC_138_0	27	0.4034	1.0	0.4034	1	1	1	0.9943
AB434711	Tubulavirales	Inoviridae	Habenivirus	150_0	Clustered	6	VC_150_0	6	1.0	1.0	1.0	1	1	1	1.0
AB451219	Caudovirales	Autographiviridae	Higashivirus	159_0	Clustered	20	VC_159_0	20	0.4495	1.0	0.4495	15	1	1	1.0
AB560486	Caudovirales	Myoviridae	Pbunavirus	170_0	Clustered	25	VC_170_0	25	0.7661	1.0	0.7661	1	1	1	1.0
AB572858	Tubulavirales	Inoviridae	Fibrovirus	143_0	Clustered	7	VC_143_0	7	926	0.99986634	0.9259	2	1	1	1.0
AB626962	Caudovirales	Rountreeviridae	Rosenblumvirus	181_0	Clustered	14	VC_181_0	14	0.7491	1.0	0.7491	2	1	1	1.0
AB647160	Caudovirales	Podoviridae	Schmidvirus	184_0	Clustered	3	VC_184_0	3	1.0	1.0	1.0	1	1	1	1.0
AB711120	Caudovirales	Myoviridae	Pemunavirus	145_0	Clustered	2	VC_145_0	2	0.6546	0.85557782	0.5601	2	2	1	1.0
AB712291	Caudovirales	Siphoviridae	Saphexavirus	185_0	Clustered	5	VC_185_0	5	0.8939	0.99999728	0.8939	1	1	1	1.0
AB716666	Caudovirales	Autographiviridae	Drulisvirus	188_0	Clustered	21	VC_188_0	21	0.7518	1.0	0.7518	3	1	1	1.0
AB731695	Caudovirales	Podoviridae	Schmidvirus	184_0	Clustered	3	VC_184_0	3	1.0	1.0	1.0	1	1	1	1.0
AB767244	Caudovirales	Myoviridae	Yokohamavirus	190_0	Clustered	6	VC_190_0	6	0.8262	0.99999995	0.8262	3	1	1	1.0
AB775549	Caudovirales	Autographiviridae	Phutvirus	172_0	Clustered	19	VC_172_0	19	0.6376	1.0	0.6376	6	1	1	1.0
AB797215	Caudovirales	Ackermannviridae	Taipeivirus	192_0	Clustered	8	VC_192_0	8	0.0691	0.99644758	0.0688	1	1	1	0.9643
AB853330	Caudovirales	Herelleviridae	Kayvirus	194_1	Clustered	25	VC_194_1	25	639	1.0	639	1	1	1	0.9967
AB853331	Caudovirales	Herelleviridae	Kayvirus	194_1	Clustered	25	VC_194_1	25	639	1.0	639	1	1	1	0.9967
AB854109	Caudovirales	Autographiviridae	Jiaoyazivirus	197_0	Clustered	2	VC_197_0	2	86	0.95436415	0.0821	2	1	1	1.0
AB863625	Caudovirales	Podoviridae	Firingavirus	201_0	Clustered	2	VC_201_0	2	0.5469	0.93569813	0.5117	1	1	1	1.0
AB903967	Caudovirales	Herelleviridae	Kayvirus	194_1	Clustered	25	VC_194_1	25	639	1.0	639	1	1	1	0.9967
AB910393	Caudovirales	Podoviridae	Kochitakasuvirus	203_0	Clustered	2	VC_203_0	2	1.0	1.0	1.0	1	1	1	1.0
AB910602	Tubulavirales	Inoviridae	Coriovirus	204_0	Clustered	4	VC_204_0	4	0.9346	0.96743352	0.9041	3	1	1	1.0
AB920995	Caudovirales	Autographiviridae	Risjevirus	159_0	Clustered	20	VC_159_0	20	0.4495	1.0	0.4495	15	1	1	1.0
AB931172	Tubulavirales	Inoviridae	Restivirus	151_0	Clustered	4	VC_151_0	4	0.9538	0.99374885	0.9478	1	1	1	1.0
AB937974	Tubulavirales	Inoviridae	Habenivirus	150_0	Clustered	6	VC_150_0	6	1.0	1.0	1.0	1	1	1	1.0
AB981170	Tubulavirales	Inoviridae	Habenivirus	150_0	Clustered	6	VC_150_0	6	1.0	1.0	1.0	1	1	1	1.0
AB983711	Caudovirales	Autographiviridae	Risjevirus	159_0	Clustered	20	VC_159_0	20	0.4495	1.0	0.4495	15	1	1	1.0
AE002163	Petitvirales	Microviridae	Chlamydiamicrovirus	11_0	Clustered/Singleton	1	VC_11_0	1	0.0	1.0	0.0	1	1	1	1.0
AE006468	Caudovirales	Myoviridae	Felsduovirus	11_1	Clustered/Singleton	1	VC_11_1	1	0.0	1.0	0.0	1	1	1	1.0
AF009630	Caudovirales	Siphoviridae	Skunavirus	206_0	Clustered	95	VC_206_0	95	0.9999	1.0	0.9999	2	1	1	1.0
AF011378	Caudovirales	Siphoviridae	Skunavirus	206_0	Clustered	95	VC_206_0	95	0.9999	1.0	0.9999	2	1	1	1.0
AF022214	Caudovirales	Siphoviridae	Fromanvirus	209_3	Clustered	10	VC_209_3	10	0.2088	1.0	0.2088	1	1	1	0.8889
AF059242	Norzivirales	Fiersviridae	Qubevirus	212_0	Clustered	4	VC_212_0	4	1.0	1.0	1.0	3	3	2	1.0
AF063097	Caudovirales	Myoviridae	Peduovirus	29_0	Clustered	32	VC_29_0	32	0.5208	1.0	0.5208	6	2	2	1.0
AF068845	Caudovirales	Siphoviridae	Timquatrovirus	214_0	Clustered	9	VC_214_0	9	0.8643	1.0	0.8643	1	1	1	1.0
AF069308	Caudovirales	Siphoviridae	Shamshuipovirus	20_0	Clustered	16	VC_20_0	16	0.5544	1.0	0.5544	10	1	1	0.8917
AF069529	Caudovirales	Siphoviridae	Byrnievirus	20_0	Clustered	16	VC_20_0	16	0.5544	1.0	0.5544	10	1	1	0.8917
AF083977	Caudovirales	Myoviridae	Muvirus	83_0	Clustered	13	VC_83_0	13	0.8428	1.0	0.8428	2	2	2	1.0
AF085222	Caudovirales	Siphoviridae	Moineauvirus	219_0	Clustered	10	VC_219_0	10	0.8655	1.0	0.8655	2	1	1	1.0
AF115102	Caudovirales	Siphoviridae	Moineauvirus	219_0	Clustered	10	VC_219_0	10	0.8655	1.0	0.8655	2	1	1	1.0
AF115103	Caudovirales	Siphoviridae	Moineauvirus	219_0	Clustered	10	VC_219_0	10	0.8655	1.0	0.8655	2	1	1	1.0
AF125163	Caudovirales	Myoviridae	Longwoodvirus	31_0	Clustered	21	VC_31_0	21	0.9045	1.0	0.9045	11	2	2	1.0
AF125520	Caudovirales	Podoviridae	Traversvirus	108_0	Clustered	21	VC_108_0	21	0.7299	1.0	0.7299	3	1	1	0.8667
AF145054	Caudovirales	Siphoviridae	Moineauvirus	219_0	Clustered	10	VC_219_0	10	0.8655	1.0	0.8655	2	1	1	1.0
AF155037	Vinavirales	Corticoviridae	Corticovirus	222_0	Clustered	2	VC_222_0	2	1.0	1.0	1.0	1	1	1	1.0
AF158101	Caudovirales	Myoviridae	Tequatrovirus	223_0	Clustered/Singleton	1	VC_223_0	1	0.0	1.0	0.0	1	1	1	1.0
AF158600	Caudovirales	Siphoviridae	Brussowvirus	219_0	Clustered	10	VC_219_0	10	0.8655	1.0	0.8655	2	1	1	1.0
AF165214	Caudovirales	Siphoviridae	Detrevirus	55_0	Clustered	2	VC_55_0	2	0.4619	0.94779222	0.4378	1	1	1	1.0
AF189021	Caudovirales	Zobellviridae	Siovirus	234_0	Clustered	4	VC_234_0	4	0.8029	0.9998533	0.8028	2	1	1	1.0
AF222060	Caudovirales	Myoviridae	Haloferacalesvirus	236_0	Clustered	4	VC_236_0	4	0.8116	0.99554435	808	1	1	1	1.0
AF232233	Caudovirales	Siphoviridae	Beetrevirus	58_0	Clustered	3	VC_58_0	3	0.2694	0.9980995	0.2689	1	1	1	1.0
AF234172	Caudovirales	Myoviridae	Punavirus	134_0	Clustered	3	VC_134_0	3	992	0.9595722	0.9519	1	1	1	1.0
AF271693	Caudovirales	Siphoviridae	Fromanvirus	208_0	Clustered	25	VC_208_0	25	0.9329	1.0	0.9329	1	1	1	1.0
AF306496	Petitvirales	Microviridae	Bdellomicrovirus	239_0	Clustered	2	VC_239_0	2	1.0	1.0	1.0	2	1	1	1.0
AF320576	Caudovirales	Myoviridae	Felixounavirus	241_0	Clustered	23	VC_241_0	23	0.9281	1.0	0.9281	3	1	1	1.0
AF334111	Norzivirales	Duinviridae	Apeevirus	212_0	Clustered	4	VC_212_0	4	1.0	1.0	1.0	3	3	2	1.0
AF338467	Caudovirales	Autographiviridae	Tiilvirus	235_0	Clustered	22	VC_235_0	22	825	1.0	825	19	1	1	1.0
AF424781	Caudovirales	Siphoviridae	Dubowvirus	138_1	Clustered	19	VC_138_1	19	0.3014	1.0	0.3014	2	1	1	0.9766
AF424782	Caudovirales	Siphoviridae	Triavirus	137_0	Clustered	23	VC_137_0	23	0.6591	1.0	0.6591	1	1	1	1.0
AF424783	Caudovirales	Siphoviridae	Peeveelvirus	136_0	Clustered	24	VC_136_0	24	0.4703	1.0	0.4703	2	1	1	0.7717
AF447491	Caudovirales	Siphoviridae	Stanholtvirus	56_0	Clustered	3	VC_56_0	3	0.5557	0.99809749	0.5547	1	1	1	1.0
AF452449	Tubulavirales	Inoviridae	Fibrovirus	143_0	Clustered	7	VC_143_0	7	926	0.99986634	0.9259	2	1	1	1.0
AF453500	Tubulavirales	Inoviridae	Fibrovirus	143_0	Clustered	7	VC_143_0	7	926	0.99986634	0.9259	2	1	1	1.0
AF493143	Caudovirales	Autographiviridae	Ghunavirus	172_0	Clustered	19	VC_172_0	19	0.6376	1.0	0.6376	6	1	1	1.0
AF513032	Caudovirales	Rountreeviridae	Rosenblumvirus	181_0	Clustered	14	VC_181_0	14	0.7491	1.0	0.7491	2	1	1	1.0
AF543311	Caudovirales	Myoviridae	Naesvirus	129_0	Clustered	7	VC_129_0	7	0.9315	1.0	0.9315	2	1	1	1.0
AJ006589	Caudovirales	Siphoviridae	Lomovskayavirus	257_0	Clustered	5	VC_257_0	5	0.7566	0.99999906	0.7566	3	1	1	1.0
AJ251789	Caudovirales	Siphoviridae	Ashduovirus	220_0	Clustered	9	VC_220_0	9	0.5302	1.0	0.5302	7	1	1	0.9444
AJ251805	Caudovirales	Autographiviridae	Teetrevirus	178_0	Clustered	44	VC_178_0	44	0.6136	1.0	0.6136	9	1	1	1.0
AJ270057	Petitvirales	Microviridae	Chlamydiamicrovirus	239_0	Clustered	2	VC_239_0	2	1.0	1.0	1.0	2	1	1	1.0
AJ278322	Caudovirales	Siphoviridae	Sasvirus	253_0	Clustered	3	VC_253_0	3	0.63	0.99790699	0.6287	2	1	1	1.0
AJ312240	Caudovirales	Siphoviridae	Psavirus	147_0	Clustered	5	VC_147_0	5	0.6479	0.99999992	0.6479	3	1	1	1.0
AJ318471	Caudovirales	Autographiviridae	Teetrevirus	178_0	Clustered	44	VC_178_0	44	0.6136	1.0	0.6136	9	1	1	1.0
AJ505558	Caudovirales	Autographiviridae	Phikmvvirus	198_0	Clustered	16	VC_198_0	16	0.8348	1.0	0.8348	1	1	1	1.0
AJ550940	Caudovirales	Siphoviridae	Lomovskayavirus	257_0	Clustered	5	VC_257_0	5	0.7566	0.99999906	0.7566	3	1	1	1.0
AJ630128	Caudovirales	Myoviridae	Nodensvirus	269_6	Clustered/Singleton	1	VC_269_6	1	0.0	1.0	0.0	1	1	1	1.0
AJ697969	Caudovirales	Myoviridae	Elvirus	243_1	Clustered	3	VC_243_1	3	0.1201	0.99144571	119	3	1	1	1.0
AM040673	Tubulavirales	Inoviridae	Staminivirus	272_0	Clustered	3	VC_272_0	3	0.5	0.0	0.0	3	1	1	1.0
AM084414	Caudovirales	Autographiviridae	Kayfunavirus	174_0	Clustered	19	VC_174_0	19	0.6886	1.0	0.6886	2	1	1	1.0
AM084415	Caudovirales	Autographiviridae	Vectrevirus	273_0	Clustered	36	VC_273_0	36	1.0	1.0	1.0	12	1	1	1.0
AM156909	Caudovirales	Drexlerviridae	Rtpvirus	275_0	Clustered	18	VC_275_0	18	0.5723	1.0	0.5723	9	1	1	1.0
AM265638	Caudovirales	Autographiviridae	Phikmvvirus	198_0	Clustered	16	VC_198_0	16	0.8348	1.0	0.8348	1	1	1	1.0
AM749441	Caudovirales	Siphoviridae	Yuavirus	277_0	Clustered	8	VC_277_0	8	0.6564	1.0	0.6564	2	1	1	1.0
AM910650	Caudovirales	Podoviridae	Bruynoghevirus	283_0	Clustered	11	VC_283_0	11	875	1.0	875	4	1	1	1.0
AM910651	Caudovirales	Autographiviridae	Phikmvvirus	198_0	Clustered	16	VC_198_0	16	0.8348	1.0	0.8348	1	1	1	1.0
AP001553	Caudovirales	Siphoviridae	Phietavirus	138_0	Clustered	27	VC_138_0	27	0.4034	1.0	0.4034	1	1	1	0.9943
AP005154	Caudovirales	Podoviridae	Traversvirus	108_0	Clustered	21	VC_108_0	21	0.7299	1.0	0.7299	3	1	1	0.8667
AP008953	Caudovirales	Siphoviridae	Dubowvirus	138_1	Clustered	19	VC_138_1	19	0.3014	1.0	0.3014	2	1	1	0.9766
AP008954	Caudovirales	Siphoviridae	Phietavirus	138_0	Clustered	27	VC_138_0	27	0.4034	1.0	0.4034	1	1	1	0.9943
AP008986	Caudovirales	Myoviridae	Naesvirus	129_0	Clustered	7	VC_129_0	7	0.9315	1.0	0.9315	2	1	1	1.0
AP009363	Caudovirales	Siphoviridae	Triavirus	137_0	Clustered	23	VC_137_0	23	0.6591	1.0	0.6591	1	1	1	1.0
AP011113	Caudovirales	Myoviridae	Tequatrovirus	223_6	Clustered	2	VC_223_6	2	0.0061	0.83610399	0.0051	1	1	1	1.0
AP011956	Caudovirales	Siphoviridae	Biseptimavirus	136_0	Clustered	24	VC_136_0	24	0.4703	1.0	0.4703	2	1	1	0.7717
AP012532	Caudovirales	Podoviridae	Traversvirus	108_0	Clustered	21	VC_108_0	21	0.7299	1.0	0.7299	3	1	1	0.8667
AP012535	Caudovirales	Podoviridae	Traversvirus	108_0	Clustered	21	VC_108_0	21	0.7299	1.0	0.7299	3	1	1	0.8667
AP012537	Caudovirales	Siphoviridae	Sawaravirus	23_0	Clustered/Singleton	1	VC_23_0	1	0.0	1.0	0.0	1	1	1	1.0
AP013029	Caudovirales	Herelleviridae	Nitunavirus	205_2	Clustered	2	VC_205_2	2	0.0303	0.95073082	0.0288	1	1	1	1.0
AP013057	Caudovirales	Myoviridae	Yokohamavirus	190_0	Clustered	6	VC_190_0	6	0.8262	0.99999995	0.8262	3	1	1	1.0
AP013538	Caudovirales	Autographiviridae	Ashivirus	235_0	Clustered	22	VC_235_0	22	825	1.0	825	19	1	1	1.0
AP013539	Caudovirales	Autographiviridae	Pedosvirus	235_0	Clustered	22	VC_235_0	22	825	1.0	825	19	1	1	1.0
AP013540	Caudovirales	Autographiviridae	Votkovvirus	176_0	Clustered	13	VC_176_0	13	0.5639	1.0	0.5639	11	1	1	1.0
AP013541	Caudovirales	Autographiviridae	Sieqvirus	176_0	Clustered	13	VC_176_0	13	0.5639	1.0	0.5639	11	1	1	1.0
AP013542	Caudovirales	Autographiviridae	Pelagivirus	176_0	Clustered	13	VC_176_0	13	0.5639	1.0	0.5639	11	1	1	1.0
AP013543	Caudovirales	Autographiviridae	Fussvirus	176_0	Clustered	13	VC_176_0	13	0.5639	1.0	0.5639	11	1	1	1.0
AP013544	Caudovirales	Autographiviridae	Ayaqvirus	176_0	Clustered	13	VC_176_0	13	0.5639	1.0	0.5639	11	1	1	1.0
AP013545	Caudovirales	Autographiviridae	Foussvirus	176_0	Clustered	13	VC_176_0	13	0.5639	1.0	0.5639	11	1	1	1.0
AP013546	Caudovirales	Autographiviridae	Oinezvirus	242_0	Clustered	3	VC_242_0	3	0.1455	0.99840215	0.1452	3	1	1	1.0
AP013547	Caudovirales	Autographiviridae	Nohivirus	242_0	Clustered	3	VC_242_0	3	0.1455	0.99840215	0.1452	3	1	1	1.0
AP013548	Caudovirales	Autographiviridae	Stopalavirus	242_0	Clustered	3	VC_242_0	3	0.1455	0.99840215	0.1452	3	1	1	1.0
AP017972	Caudovirales	Myoviridae	Tidunavirus	243_0	Clustered	5	VC_243_0	5	0.4222	0.99999993	0.4222	2	1	1	1.0
AP018361	Caudovirales	Siphoviridae	Sukhumvitvirus	220_0	Clustered	9	VC_220_0	9	0.5302	1.0	0.5302	7	1	1	0.9444
AP018814	Caudovirales	Myoviridae	Tequatrovirus	223_1	Clustered	2	VC_223_1	2	0.0061	0.83550618	0.0051	1	1	1	1.0
AP019524	Caudovirales	Myoviridae	Shirahamavirus	293_0	Clustered	2	VC_293_0	2	1.0	1.0	1.0	2	1	1	1.0
AP019527	Caudovirales	Siphoviridae	Teubervirus	294_0	Clustered	5	VC_294_0	5	1.0	1.0	1.0	1	1	1	1.0
AP019535	Caudovirales	Myoviridae	Pbunavirus	170_0	Clustered	25	VC_170_0	25	0.7661	1.0	0.7661	1	1	1	1.0
AP019559	Caudovirales	Demerecviridae	Tequintavirus	295_1	Clustered	28	VC_295_1	28	0.5228	1.0	0.5228	1	1	1	0.9974
AY027935	Caudovirales	Myoviridae	Hpunavirus	31_0	Clustered	21	VC_31_0	21	0.9045	1.0	0.9045	11	2	2	1.0
AY078382	Caudovirales	Podoviridae	Bruynoghevirus	283_0	Clustered	11	VC_283_0	11	875	1.0	875	4	1	1	1.0
AY095314	Caudovirales	Zobellviridae	Vipivirus	233_0	Clustered	5	VC_233_0	5	0.4871	0.99997176	0.4871	5	1	1	1.0
AY129330	Caudovirales	Siphoviridae	Cheoctovirus	215_0	Clustered	25	VC_215_0	25	706	1.0	706	1	1	1	0.91
AY129331	Caudovirales	Siphoviridae	Kostyavirus	306_0	Clustered	9	VC_306_0	9	0.8478	1.0	0.8478	1	1	1	1.0
AY129332	Caudovirales	Siphoviridae	Fromanvirus	209_1	Clustered	14	VC_209_1	14	0.2933	1.0	0.2933	1	1	1	989
AY129334	Caudovirales	Siphoviridae	Rosebushvirus	255_2	Clustered	4	VC_255_2	4	123	0.9999796	123	2	1	1	1.0
AY129335	Caudovirales	Siphoviridae	Corndogvirus	302_0	Clustered	2	VC_302_0	2	0.2626	0.95536031	0.2509	1	1	1	1.0
AY129337	Caudovirales	Myoviridae	Bixzunavirus	311_0	Clustered	7	VC_311_0	7	998	0.99999972	998	1	1	1	1.0
AY129338	Caudovirales	Siphoviridae	Omegavirus	217_2	Clustered	2	VC_217_2	2	0.0737	0.94510752	0.0697	1	1	1	1.0
AY131267	Caudovirales	Siphoviridae	Lacnuvirus	220_0	Clustered	9	VC_220_0	9	0.5302	1.0	0.5302	7	1	1	0.9444
AY135486	Caudovirales	Myoviridae	Eganvirus	29_0	Clustered	32	VC_29_0	32	0.5208	1.0	0.5208	6	2	2	1.0
AY135739	Caudovirales	Myoviridae	Peduovirus	29_0	Clustered	32	VC_29_0	32	0.5208	1.0	0.5208	6	2	2	1.0
AY150271	Caudovirales	Podoviridae	Uetakevirus	39_0	Clustered	5	VC_39_0	5	0.8527	0.99999789	0.8527	2	2	2	1.0
AY190604	Caudovirales	Myoviridae	Haloferacalesvirus	236_0	Clustered	4	VC_236_0	4	0.8116	0.99554435	808	1	1	1	1.0
AY216660	Caudovirales	Drexlerviridae	Tunavirus	274_0	Clustered	18	VC_274_0	18	0.4852	1.0	0.4852	3	1	1	1.0
AY236756	Caudovirales	Siphoviridae	Coetzeevirus	292_0	Clustered	3	VC_292_0	3	0.9198	0.99054823	0.9111	1	1	1	1.0
AY242528	Tubulavirales	Inoviridae	Fibrovirus	143_0	Clustered	7	VC_143_0	7	926	0.99986634	0.9259	2	1	1	1.0
AY251033	Caudovirales	Myoviridae	Peduovirus	29_0	Clustered	32	VC_29_0	32	0.5208	1.0	0.5208	6	2	2	1.0
AY257527	Kalamavirales	Tectiviridae	Betatectivirus	320_0	Clustered	4	VC_320_0	4	1.0	1.0	1.0	1	1	1	1.0
AY266303	Caudovirales	Myoviridae	Unassigned	225_2	Clustered/Singleton	1	VC_225_2	1	0.0	1.0	0.0	1	1	1	1.0
AY283928	Caudovirales	Myoviridae	Schizotequatrovirus	226_0	Clustered	3	VC_226_0	3	0.1354	0.99858145	0.1352	1	1	1	1.0
AY288927	Caudovirales	Autographiviridae	Zindervirus	273_0	Clustered	36	VC_273_0	36	1.0	1.0	1.0	12	1	1	1.0
AY308796	Caudovirales	Drexlerviridae	Tlsvirus	276_0	Clustered	39	VC_276_0	39	0.7136	1.0	0.7136	9	1	1	807
AY343333	Caudovirales	Myoviridae	Krischvirus	228_0	Clustered	5	VC_228_0	5	138	0.99999997	138	1	1	1	1.0
AY368235	Caudovirales	Myoviridae	Naesvirus	129_0	Clustered	7	VC_129_0	7	0.9315	1.0	0.9315	2	1	1	1.0
AY369265	Caudovirales	Myoviridae	Naesvirus	129_0	Clustered	7	VC_129_0	7	0.9315	1.0	0.9315	2	1	1	1.0
AY370674	Caudovirales	Autographiviridae	Vectrevirus	273_0	Clustered	36	VC_273_0	36	1.0	1.0	1.0	12	1	1	1.0
AY375531	Caudovirales	Myoviridae	Biquartavirus	229_0	Clustered	6	VC_229_0	6	0.1516	1.0	0.1516	2	1	1	1.0
AY394005	Caudovirales	Siphoviridae	Casadabanvirus	88_0	Clustered	8	VC_88_0	8	0.7688	1.0	0.7688	1	1	1	1.0
AY453853	Caudovirales	Siphoviridae	Stanholtvirus	56_0	Clustered	3	VC_56_0	3	0.5557	0.99809749	0.5547	1	1	1	1.0
AY500152	Caudovirales	Siphoviridae	Fromanvirus	208_0	Clustered	25	VC_208_0	25	0.9329	1.0	0.9329	1	1	1	1.0
AY500153	Caudovirales	Siphoviridae	Fromanvirus	208_0	Clustered	25	VC_208_0	25	0.9329	1.0	0.9329	1	1	1	1.0
AY505112	Caudovirales	Podoviridae	Enhodamvirus	327_0	Clustered	3	VC_327_0	3	1.0	1.0	1.0	1	1	1	1.0
AY508486	Caudovirales	Siphoviridae	Biseptimavirus	136_0	Clustered	24	VC_136_0	24	0.4703	1.0	0.4703	2	1	1	0.7717
AY510084	Caudovirales	Podoviridae	Enhodamvirus	327_0	Clustered	3	VC_327_0	3	1.0	1.0	1.0	1	1	1	1.0
AY539836	Caudovirales	Myoviridae	Bcepmuvirus	57_0	Clustered	9	VC_57_0	9	0.7272	1.0	0.7272	2	2	2	1.0
AY543070	Caudovirales	Demerecviridae	Tequintavirus	295_1	Clustered	28	VC_295_1	28	0.5228	1.0	0.5228	1	1	1	0.9974
AY605066	Caudovirales	Siphoviridae	Fattrevirus	220_0	Clustered	9	VC_220_0	9	0.5302	1.0	0.5302	7	1	1	0.9444
AY605181	Caudovirales	Podoviridae	Ryyoungvirus	45_0	Clustered	2	VC_45_0	2	0.3029	0.94620909	0.2866	2	1	1	1.0
AY625898	Caudovirales	Podoviridae	Hollowayvirus	331_0	Clustered	2	VC_331_0	2	0.9577	0.72985431	699	1	1	1	1.0
AY682195	Caudovirales	Herelleviridae	Salchichonvirus	288_1	Clustered	3	VC_288_1	3	0.1276	0.99570175	127	3	1	1	1.0
AY699705	Caudovirales	Siphoviridae	Brussowvirus	219_0	Clustered	10	VC_219_0	10	0.8655	1.0	0.8655	2	1	1	1.0
AY701338	Kalamavirales	Tectiviridae	Betatectivirus	320_0	Clustered	4	VC_320_0	4	1.0	1.0	1.0	1	1	1	1.0
AY730274	Caudovirales	Siphoviridae	Jerseyvirus	333_0	Clustered	18	VC_333_0	18	0.8639	1.0	0.8639	3	1	1	1.0
AY739900	Caudovirales	Siphoviridae	Cequinquevirus	334_0	Clustered	6	VC_334_0	6	1.0	1.0	1.0	1	1	1	1.0
AY848686	Kalamavirales	Tectiviridae	Alphatectivirus	335_0	Clustered	2	VC_335_0	2	0.9143	0.76024994	0.6951	1	1	1	1.0
AY848689	Kalamavirales	Tectiviridae	Alphatectivirus	335_0	Clustered	2	VC_335_0	2	0.9143	0.76024994	0.6951	1	1	1	1.0
AY855346	Caudovirales	Myoviridae	Lubbockvirus	336_1	Clustered	2	VC_336_1	2	0.1014	0.94752471	0.0961	1	1	1	1.0
AY939843	Caudovirales	Autographiviridae	Tiamatvirus	235_0	Clustered	22	VC_235_0	22	825	1.0	825	19	1	1	1.0
AY939844	Caudovirales	Myoviridae	Salacisavirus	269_13	Clustered/Singleton	1	VC_269_13	1	0.0	1.0	0.0	1	1	1	1.0
AY940168	Caudovirales	Myoviridae	Ronodorvirus	269_20	Clustered	2	VC_269_20	2	0.0192	0.9503342	0.0183	1	1	1	1.0
AY954949	Caudovirales	Rountreeviridae	Rosenblumvirus	181_0	Clustered	14	VC_181_0	14	0.7491	1.0	0.7491	2	1	1	1.0
AY954950	Caudovirales	Siphoviridae	Phietavirus	138_1	Clustered	19	VC_138_1	19	0.3014	1.0	0.3014	2	1	1	0.9766
AY954951	Caudovirales	Siphoviridae	Dubowvirus	138_1	Clustered	19	VC_138_1	19	0.3014	1.0	0.3014	2	1	1	0.9766
AY954952	Caudovirales	Siphoviridae	Dubowvirus	138_1	Clustered	19	VC_138_1	19	0.3014	1.0	0.3014	2	1	1	0.9766
AY954953	Caudovirales	Siphoviridae	Dubowvirus	138_1	Clustered	19	VC_138_1	19	0.3014	1.0	0.3014	2	1	1	0.9766
AY954954	Caudovirales	Siphoviridae	Fibralongavirus	140_0	Clustered	2	VC_140_0	2	0.0531	0.95643643	0.0508	1	1	1	1.0
AY954955	Caudovirales	Siphoviridae	Triavirus	137_0	Clustered	23	VC_137_0	23	0.6591	1.0	0.6591	1	1	1	1.0
AY954956	Caudovirales	Siphoviridae	Triavirus	137_0	Clustered	23	VC_137_0	23	0.6591	1.0	0.6591	1	1	1	1.0
AY954957	Caudovirales	Siphoviridae	Triavirus	137_0	Clustered	23	VC_137_0	23	0.6591	1.0	0.6591	1	1	1	1.0
AY954960	Caudovirales	Siphoviridae	Phietavirus	138_0	Clustered	27	VC_138_0	27	0.4034	1.0	0.4034	1	1	1	0.9943
AY954961	Caudovirales	Siphoviridae	Phietavirus	138_0	Clustered	27	VC_138_0	27	0.4034	1.0	0.4034	1	1	1	0.9943
AY954962	Caudovirales	Siphoviridae	Phietavirus	138_0	Clustered	27	VC_138_0	27	0.4034	1.0	0.4034	1	1	1	0.9943
AY954963	Caudovirales	Siphoviridae	Phietavirus	138_0	Clustered	27	VC_138_0	27	0.4034	1.0	0.4034	1	1	1	0.9943
AY954964	Caudovirales	Siphoviridae	Phietavirus	138_0	Clustered	27	VC_138_0	27	0.4034	1.0	0.4034	1	1	1	0.9943
AY954965	Caudovirales	Siphoviridae	Phietavirus	138_0	Clustered	27	VC_138_0	27	0.4034	1.0	0.4034	1	1	1	0.9943
AY954966	Caudovirales	Siphoviridae	Phietavirus	138_0	Clustered	27	VC_138_0	27	0.4034	1.0	0.4034	1	1	1	0.9943
AY954967	Caudovirales	Siphoviridae	Phietavirus	138_0	Clustered	27	VC_138_0	27	0.4034	1.0	0.4034	1	1	1	0.9943
AY954968	Caudovirales	Siphoviridae	Phietavirus	138_0	Clustered	27	VC_138_0	27	0.4034	1.0	0.4034	1	1	1	0.9943
AY954969	Caudovirales	Herelleviridae	Kayvirus	194_1	Clustered	25	VC_194_1	25	639	1.0	639	1	1	1	0.9967
AY954970	Caudovirales	Herelleviridae	Twortvirus	194_4	Clustered/Singleton	1	VC_194_4	1	0.0	1.0	0.0	1	1	1	1.0
AY967407	Caudovirales	Myoviridae	Pseudotevenvirus	291_1	Clustered	9	VC_291_1	9	0.2921	1.0	0.2921	1	1	1	1.0
CP000622	Caudovirales	Myoviridae	Bcepmuvirus	57_0	Clustered	9	VC_57_0	9	0.7272	1.0	0.7272	2	2	2	1.0
CP000625	Caudovirales	Siphoviridae	Stanholtvirus	56_0	Clustered	3	VC_56_0	3	0.5557	0.99809749	0.5547	1	1	1	1.0
CP000917	Caudovirales	Demerecviridae	Epseptimavirus	296_0	Clustered	32	VC_296_0	32	0.5628	1.0	0.5628	1	1	1	996
D89074	Tubulavirales	Inoviridae	Fibrovirus	143_0	Clustered	7	VC_143_0	7	926	0.99986634	0.9259	2	1	1	1.0
DQ003638	Caudovirales	Herelleviridae	Pecentumvirus	287_0	Clustered	13	VC_287_0	13	0.6972	1.0	0.6972	1	1	1	1.0
DQ003639	Caudovirales	Siphoviridae	Jelitavirus	147_0	Clustered	5	VC_147_0	5	0.6479	0.99999992	0.6479	3	1	1	1.0
DQ004855	Caudovirales	Herelleviridae	Pecentumvirus	287_0	Clustered	13	VC_287_0	13	0.6972	1.0	0.6972	1	1	1	1.0
DQ029335	Caudovirales	Autographiviridae	Chatterjeevirus	177_0	Clustered	3	VC_177_0	3	0.0505	0.99856053	0.0505	1	1	1	1.0
DQ054536	Caudovirales	Siphoviridae	Skunavirus	206_0	Clustered	95	VC_206_0	95	0.9999	1.0	0.9999	2	1	1	1.0
DQ079870	Petitvirales	Microviridae	Alphatrevirus	339_0	Clustered	10	VC_339_0	10	717	1.0	717	1	1	1	1.0
DQ079871	Petitvirales	Microviridae	Alphatrevirus	339_0	Clustered	10	VC_339_0	10	717	1.0	717	1	1	1	1.0
DQ079872	Petitvirales	Microviridae	Alphatrevirus	339_0	Clustered	10	VC_339_0	10	717	1.0	717	1	1	1	1.0
DQ079874	Petitvirales	Microviridae	Alphatrevirus	339_0	Clustered	10	VC_339_0	10	717	1.0	717	1	1	1	1.0
DQ079875	Petitvirales	Microviridae	Alphatrevirus	339_0	Clustered	10	VC_339_0	10	717	1.0	717	1	1	1	1.0
DQ079876	Petitvirales	Microviridae	Alphatrevirus	339_0	Clustered	10	VC_339_0	10	717	1.0	717	1	1	1	1.0
DQ079879	Petitvirales	Microviridae	Alphatrevirus	339_0	Clustered	10	VC_339_0	10	717	1.0	717	1	1	1	1.0
DQ114220	Caudovirales	Myoviridae	Irtavirus	31_0	Clustered	21	VC_31_0	21	0.9045	1.0	0.9045	11	2	2	1.0
DQ121662	Caudovirales	Drexlerviridae	Rogunavirus	275_0	Clustered	18	VC_275_0	18	0.5723	1.0	0.5723	9	1	1	1.0
DQ126339	Caudovirales	Podoviridae	Uetakevirus	39_0	Clustered	5	VC_39_0	5	0.8527	0.99999789	0.8527	2	2	2	1.0
DQ227763	Caudovirales	Siphoviridae	Skunavirus	206_0	Clustered	95	VC_206_0	95	0.9999	1.0	0.9999	2	1	1	1.0
DQ289555	Caudovirales	Siphoviridae	Wbetavirus	348_0	Clustered	3	VC_348_0	3	0.1537	0.99033602	0.1522	2	1	1	1.0
DQ340064	Caudovirales	Myoviridae	Svunavirus	260_0	Clustered	2	VC_260_0	2	0.7795	0.91418477	0.7126	1	1	1	1.0
DQ398041	Caudovirales	Siphoviridae	Kostyavirus	306_0	Clustered	9	VC_306_0	9	0.8478	1.0	0.8478	1	1	1	1.0
DQ398042	Caudovirales	Siphoviridae	Liefievirus	213_0	Clustered	2	VC_213_0	2	0.2979	0.94824791	0.2825	1	1	1	1.0
DQ398043	Caudovirales	Siphoviridae	Fromanvirus	209_3	Clustered	10	VC_209_3	10	0.2088	1.0	0.2088	1	1	1	0.8889
DQ398044	Caudovirales	Siphoviridae	Coopervirus	255_1	Clustered	13	VC_255_1	13	0.4839	1.0	0.4839	2	1	1	1.0
DQ398045	Caudovirales	Siphoviridae	Cheoctovirus	215_0	Clustered	25	VC_215_0	25	706	1.0	706	1	1	1	0.91
DQ398049	Caudovirales	Siphoviridae	Pipefishvirus	255_0	Clustered	4	VC_255_0	4	0.1688	0.9999794	0.1688	1	1	1	1.0
DQ398050	Caudovirales	Siphoviridae	Cheoctovirus	215_0	Clustered	25	VC_215_0	25	706	1.0	706	1	1	1	0.91
DQ398051	Caudovirales	Siphoviridae	Plotvirus	312_0	Clustered	2	VC_312_0	2	0.1182	0.94941622	0.1123	2	1	1	1.0
DQ431235	Caudovirales	Siphoviridae	Pahexavirus	350_0	Clustered	57	VC_350_0	57	1.0	1.0	1.0	1	1	1	1.0
DQ466086	Caudovirales	Myoviridae	Yongloolinvirus	336_2	Clustered	4	VC_336_2	4	0.3077	0.99996841	0.3077	1	1	1	1.0
DQ517338	Caudovirales	Siphoviridae	Dubowvirus	138_1	Clustered	19	VC_138_1	19	0.3014	1.0	0.3014	2	1	1	0.9766
DQ529280	Caudovirales	Myoviridae	Tulanevirus	229_0	Clustered	6	VC_229_0	6	0.1516	1.0	0.1516	2	1	1	1.0
DQ530359	Caudovirales	Siphoviridae	Dubowvirus	138_1	Clustered	19	VC_138_1	19	0.3014	1.0	0.3014	2	1	1	0.9766
DQ530360	Caudovirales	Siphoviridae	Dubowvirus	138_1	Clustered	19	VC_138_1	19	0.3014	1.0	0.3014	2	1	1	0.9766
DQ530361	Caudovirales	Siphoviridae	Biseptimavirus	136_0	Clustered	24	VC_136_0	24	0.4703	1.0	0.4703	2	1	1	0.7717
DQ530362	Caudovirales	Siphoviridae	Phietavirus	138_0	Clustered	27	VC_138_0	27	0.4034	1.0	0.4034	1	1	1	0.9943
DQ631426	Caudovirales	Siphoviridae	Casadabanvirus	88_0	Clustered	8	VC_88_0	8	0.7688	1.0	0.7688	1	1	1	1.0
DQ674738	Caudovirales	Myoviridae	Bielevirus	31_0	Clustered	21	VC_31_0	21	0.9045	1.0	0.9045	11	2	2	1.0
DQ836063	Norzivirales	Fiersviridae	Perrunavirus	357_0	Clustered	4	VC_357_0	4	0.7388	0.99997607	0.7388	4	1	1	1.0
DQ840344	Caudovirales	Myoviridae	Svunavirus	260_0	Clustered	2	VC_260_0	2	0.7795	0.91418477	0.7126	1	1	1	1.0
DQ873690	Caudovirales	Siphoviridae	Casadabanvirus	88_0	Clustered	8	VC_88_0	8	0.7688	1.0	0.7688	1	1	1	1.0
DQ904452	Caudovirales	Myoviridae	Tequatrovirus	223_3	Clustered/Singleton	1	VC_223_3	1	0.0	1.0	0.0	1	1	1	1.0
DQ908929	Caudovirales	Siphoviridae	Phietavirus	138_0	Clustered	27	VC_138_0	27	0.4034	1.0	0.4034	1	1	1	0.9943
EF056009	Caudovirales	Schitoviridae	Enquatrovirus	361_1	Clustered	26	VC_361_1	26	606	1.0	606	14	1	1	0.7323
EF057797	Caudovirales	Myoviridae	Hapunavirus	317_0	Clustered	2	VC_317_0	2	0.2762	0.93211095	0.2575	1	1	1	1.0
EF068134	Norzivirales	Fiersviridae	Qubevirus	212_0	Clustered	4	VC_212_0	4	1.0	1.0	1.0	3	3	2	1.0
EF153632	Caudovirales	Myoviridae	Bcepfunavirus	171_1	Clustered	7	VC_171_1	7	0.1027	0.83554432	0.0858	5	1	1	0.9048
EF160123	Caudovirales	Autographiviridae	Eracentumvirus	273_0	Clustered	36	VC_273_0	36	1.0	1.0	1.0	12	1	1	1.0
EF177456	Caudovirales	Siphoviridae	Jerseyvirus	333_0	Clustered	18	VC_333_0	18	0.8639	1.0	0.8639	3	1	1	1.0
EF372997	Caudovirales	Autographiviridae	Voetvirus	235_0	Clustered	22	VC_235_0	22	825	1.0	825	19	1	1	1.0
EF437941	Caudovirales	Myoviridae	Krischvirus	228_0	Clustered	5	VC_228_0	5	138	0.99999997	138	1	1	1	1.0
EF460875	Caudovirales	Chaseviridae	Carltongylesvirus	368_0	Clustered	11	VC_368_0	11	0.8553	1.0	0.8553	6	1	1	1.0
EF462197	Caudovirales	Siphoviridae	Peeveelvirus	136_0	Clustered	24	VC_136_0	24	0.4703	1.0	0.4703	2	1	1	0.7717
EF462198	Caudovirales	Siphoviridae	Triavirus	137_0	Clustered	23	VC_137_0	23	0.6591	1.0	0.6591	1	1	1	1.0
EF489910	Tubulavirales	Inoviridae	Psecadovirus	272_0	Clustered	3	VC_272_0	3	0.5	0.0	0.0	3	1	1	1.0
EF506570	Tubulavirales	Plectroviridae	Vespertiliovirus	370_0	Clustered	3	VC_370_0	3	1.0	1.0	1.0	1	1	1	1.0
EF529515	Caudovirales	Siphoviridae	Brussowvirus	219_0	Clustered	10	VC_219_0	10	0.8655	1.0	0.8655	2	1	1	1.0
EF536069	Caudovirales	Siphoviridae	Cheoctovirus	215_0	Clustered	25	VC_215_0	25	706	1.0	706	1	1	1	0.91
EF537008	Caudovirales	Podoviridae	Wumptrevirus	359_0	Clustered	2	VC_359_0	2	0.5597	0.86822376	0.4859	1	1	1	1.0
EF602154	Caudovirales	Myoviridae	Naesvirus	129_0	Clustered	7	VC_129_0	7	0.9315	1.0	0.9315	2	1	1	1.0
EU056923	Caudovirales	Autographiviridae	Phikmvvirus	198_0	Clustered	16	VC_198_0	16	0.8348	1.0	0.8348	1	1	1	1.0
EU100883	Caudovirales	Siphoviridae	Oshimavirus	378_0	Clustered	2	VC_378_0	2	1.0	1.0	1.0	1	1	1	1.0
EU100884	Caudovirales	Siphoviridae	Oshimavirus	378_0	Clustered	2	VC_378_0	2	1.0	1.0	1.0	1	1	1	1.0
EU136189	Caudovirales	Rountreeviridae	Rosenblumvirus	181_0	Clustered	14	VC_181_0	14	0.7491	1.0	0.7491	2	1	1	1.0
EU221285	Caudovirales	Siphoviridae	Skunavirus	206_0	Clustered	95	VC_206_0	95	0.9999	1.0	0.9999	2	1	1	1.0
EU236438	Caudovirales	Autographiviridae	Phikmvvirus	198_0	Clustered	16	VC_198_0	16	0.8348	1.0	0.8348	1	1	1	1.0
EU246945	Caudovirales	Siphoviridae	Larmunavirus	220_0	Clustered	9	VC_220_0	9	0.5302	1.0	0.5302	7	1	1	0.9444
EU272036	Caudovirales	Siphoviridae	Casadabanvirus	88_0	Clustered	8	VC_88_0	8	0.7688	1.0	0.7688	1	1	1	1.0
EU272037	Caudovirales	Siphoviridae	Casadabanvirus	88_0	Clustered	8	VC_88_0	8	0.7688	1.0	0.7688	1	1	1	1.0
EU311208	Caudovirales	Podoviridae	Traversvirus	108_0	Clustered	21	VC_108_0	21	0.7299	1.0	0.7299	3	1	1	0.8667
EU330206	Caudovirales	Podoviridae	Kuravirus	284_0	Clustered	6	VC_284_0	6	0.7396	1.0	0.7396	1	1	1	1.0
EU340421	Caudovirales	Siphoviridae	Cequinquevirus	334_0	Clustered	6	VC_334_0	6	1.0	1.0	1.0	1	1	1	1.0
EU399241	Caudovirales	Myoviridae	Hapunavirus	317_0	Clustered	2	VC_317_0	2	0.2762	0.93211095	0.2575	1	1	1	1.0
EU408779	Kalamavirales	Tectiviridae	Betatectivirus	320_0	Clustered	4	VC_320_0	4	1.0	1.0	1.0	1	1	1	1.0
EU418428	Caudovirales	Herelleviridae	Kayvirus	194_1	Clustered	25	VC_194_1	25	639	1.0	639	1	1	1	0.9967
EU547803	Caudovirales	Autographiviridae	Teetrevirus	178_0	Clustered	44	VC_178_0	44	0.6136	1.0	0.6136	9	1	1	1.0
EU622808	Caudovirales	Salasmaviridae	Beecentumtrevirus	341_0	Clustered	15	VC_341_0	15	0.6315	1.0	0.6315	7	1	1	1.0
EU652770	Caudovirales	Autographiviridae	Minipunavirus	178_0	Clustered	44	VC_178_0	44	0.6136	1.0	0.6136	9	1	1	1.0
EU710883	Caudovirales	Myoviridae	Kolesnikvirus	240_0	Clustered	2	VC_240_0	2	0.0493	0.95249915	47	1	1	1	1.0
EU716414	Caudovirales	Myoviridae	Pbunavirus	170_0	Clustered	25	VC_170_0	25	0.7661	1.0	0.7661	1	1	1	1.0
EU719189	Caudovirales	Myoviridae	Colneyvirus	336_0	Clustered	5	VC_336_0	5	0.4237	0.99999966	0.4237	1	1	1	1.0
EU734172	Caudovirales	Autographiviridae	Kayfunavirus	174_0	Clustered	19	VC_174_0	19	0.6886	1.0	0.6886	2	1	1	1.0
EU734173	Caudovirales	Autographiviridae	Przondovirus	263_0	Clustered	25	VC_263_0	25	0.7384	1.0	0.7384	1	1	1	1.0
EU734174	Caudovirales	Autographiviridae	Teseptimavirus	178_0	Clustered	44	VC_178_0	44	0.6136	1.0	0.6136	9	1	1	1.0
EU744248	Caudovirales	Siphoviridae	Fromanvirus	208_0	Clustered	25	VC_208_0	25	0.9329	1.0	0.9329	1	1	1	1.0
EU744249	Caudovirales	Siphoviridae	Fromanvirus	208_0	Clustered	25	VC_208_0	25	0.9329	1.0	0.9329	1	1	1	1.0
EU744250	Caudovirales	Siphoviridae	Fromanvirus	209_3	Clustered	10	VC_209_3	10	0.2088	1.0	0.2088	1	1	1	0.8889
EU744251	Caudovirales	Siphoviridae	Fromanvirus	208_0	Clustered	25	VC_208_0	25	0.9329	1.0	0.9329	1	1	1	1.0
EU770221	Caudovirales	Siphoviridae	Coopervirus	255_1	Clustered	13	VC_255_1	13	0.4839	1.0	0.4839	2	1	1	1.0
EU771092	Caudovirales	Salasmaviridae	Salasvirus	341_0	Clustered	15	VC_341_0	15	0.6315	1.0	0.6315	7	1	1	1.0
EU816588	Caudovirales	Siphoviridae	Kostyavirus	306_0	Clustered	9	VC_306_0	9	0.8478	1.0	0.8478	1	1	1	1.0
EU816590	Caudovirales	Siphoviridae	Cheoctovirus	215_0	Clustered	25	VC_215_0	25	706	1.0	706	1	1	1	0.91
EU816591	Caudovirales	Siphoviridae	Kostyavirus	306_0	Clustered	9	VC_306_0	9	0.8478	1.0	0.8478	1	1	1	1.0
EU826470	Caudovirales	Siphoviridae	Fromanvirus	208_0	Clustered	25	VC_208_0	25	0.9329	1.0	0.9329	1	1	1	1.0
EU861004	Caudovirales	Siphoviridae	Dubowvirus	138_1	Clustered	19	VC_138_1	19	0.3014	1.0	0.3014	2	1	1	0.9766
EU861005	Caudovirales	Siphoviridae	Triavirus	137_0	Clustered	23	VC_137_0	23	0.6591	1.0	0.6591	1	1	1	1.0
EU863408	Caudovirales	Myoviridae	Krischvirus	228_0	Clustered	5	VC_228_0	5	138	0.99999997	138	1	1	1	1.0
EU874396	Caudovirales	Siphoviridae	Cecivirus	329_0	Clustered	2	VC_329_0	2	0.2839	0.94787514	0.2691	1	1	1	1.0
EU877232	Caudovirales	Myoviridae	Felixounavirus	241_0	Clustered	23	VC_241_0	23	0.9281	1.0	0.9281	3	1	1	1.0
EU887664	Caudovirales	Siphoviridae	Lwoffvirus	379_0	Clustered	2	VC_379_0	2	0.9565	0.85557782	0.8183	1	1	1	1.0
FJ174690	Caudovirales	Siphoviridae	Cheoctovirus	215_0	Clustered	25	VC_215_0	25	706	1.0	706	1	1	1	0.91
FJ174692	Caudovirales	Siphoviridae	Cheoctovirus	215_0	Clustered	25	VC_215_0	25	706	1.0	706	1	1	1	0.91
FJ174693	Caudovirales	Siphoviridae	Cheoctovirus	215_0	Clustered	25	VC_215_0	25	706	1.0	706	1	1	1	0.91
FJ226752	Caudovirales	Siphoviridae	Brussowvirus	219_0	Clustered	10	VC_219_0	10	0.8655	1.0	0.8655	2	1	1	1.0
FJ230960	Caudovirales	Herelleviridae	Okubovirus	289_0	Clustered	2	VC_289_0	2	0.2449	0.95541888	234	1	1	1	1.0
FJ236310	Caudovirales	Siphoviridae	Moineauvirus	219_0	Clustered	10	VC_219_0	10	0.8655	1.0	0.8655	2	1	1	1.0
FJ373894	Caudovirales	Ackermannviridae	Agtrevirus	192_2	Clustered	7	VC_192_2	7	0.0588	0.98661488	58	2	1	1	1.0
FJ409640	Caudovirales	Autographiviridae	Chatterjeevirus	177_0	Clustered	3	VC_177_0	3	0.0505	0.99856053	0.0505	1	1	1	1.0
FJ429185	Caudovirales	Siphoviridae	Teubervirus	294_0	Clustered	5	VC_294_0	5	1.0	1.0	1.0	1	1	1	1.0
FJ706171	Caudovirales	Siphoviridae	Pahexavirus	350_0	Clustered	57	VC_350_0	57	1.0	1.0	1.0	1	1	1	1.0
FJ706172	Caudovirales	Siphoviridae	Pahexavirus	350_0	Clustered	57	VC_350_0	57	1.0	1.0	1.0	1	1	1	1.0
FJ713816	Caudovirales	Siphoviridae	Peeveelvirus	136_0	Clustered	24	VC_136_0	24	0.4703	1.0	0.4703	2	1	1	0.7717
FJ750948	Caudovirales	Siphoviridae	Dhillonvirus	71_0	Clustered	7	VC_71_0	7	0.5529	1.0	0.5529	1	1	1	1.0
FJ839692	Caudovirales	Myoviridae	Tequatrovirus	223_5	Clustered	2	VC_223_5	2	0.0061	0.8336808	0.0051	1	1	1	1.0
FJ848881	Caudovirales	Siphoviridae	Skunavirus	206_0	Clustered	95	VC_206_0	95	0.9999	1.0	0.9999	2	1	1	1.0
FJ848882	Caudovirales	Siphoviridae	Skunavirus	206_0	Clustered	95	VC_206_0	95	0.9999	1.0	0.9999	2	1	1	1.0
FJ848883	Caudovirales	Siphoviridae	Skunavirus	206_0	Clustered	95	VC_206_0	95	0.9999	1.0	0.9999	2	1	1	1.0
FJ848884	Caudovirales	Siphoviridae	Skunavirus	206_0	Clustered	95	VC_206_0	95	0.9999	1.0	0.9999	2	1	1	1.0
FJ896200	Caudovirales	Autographiviridae	Maculvirus	187_0	Clustered	3	VC_187_0	3	0.1318	0.99838944	0.1316	1	1	1	1.0
FJ904927	Tubulavirales	Inoviridae	Fibrovirus	143_0	Clustered	7	VC_143_0	7	926	0.99986634	0.9259	2	1	1	1.0
FM201281	Caudovirales	Myoviridae	Pbunavirus	170_0	Clustered	25	VC_170_0	25	0.7661	1.0	0.7661	1	1	1	1.0
FM201282	Caudovirales	Myoviridae	Pbunavirus	170_0	Clustered	25	VC_170_0	25	0.7661	1.0	0.7661	1	1	1	1.0
FM887021	Caudovirales	Myoviridae	Pbunavirus	170_0	Clustered	25	VC_170_0	25	0.7661	1.0	0.7661	1	1	1	1.0
FM897211	Caudovirales	Myoviridae	Pbunavirus	170_0	Clustered	25	VC_170_0	25	0.7661	1.0	0.7661	1	1	1	1.0
FN263372	Caudovirales	Autographiviridae	Phikmvvirus	198_0	Clustered	16	VC_198_0	16	0.8348	1.0	0.8348	1	1	1	1.0
FN422398	Caudovirales	Schitoviridae	Luzseptimavirus	362_0	Clustered	2	VC_362_0	2	99	0.95553563	0.0946	1	1	1	1.0
FN667788	Caudovirales	Myoviridae	Firehammervirus	381_0	Clustered	3	VC_381_0	3	0.6686	0.99549575	0.6656	1	1	1	1.0
FN667789	Caudovirales	Myoviridae	Firehammervirus	381_0	Clustered	3	VC_381_0	3	0.6686	0.99549575	0.6656	1	1	1	1.0
FO818745	Caudovirales	Myoviridae	Punavirus	134_0	Clustered	3	VC_134_0	3	992	0.9595722	0.9519	1	1	1	1.0
FQ312032	Caudovirales	Ackermannviridae	Kuttervirus	192_1	Clustered	35	VC_192_1	35	0.4572	1.0	0.4572	1	1	1	1.0
FR667955	Caudovirales	Autographiviridae	Teseptimavirus	178_0	Clustered	44	VC_178_0	44	0.6136	1.0	0.6136	9	1	1	1.0
FR751545	Caudovirales	Autographiviridae	Waewaevirus	199_0	Clustered	3	VC_199_0	3	0.1941	0.99845318	0.1938	2	1	1	1.0
FR823298	Caudovirales	Autographiviridae	Troedvirus	172_0	Clustered	19	VC_172_0	19	0.6376	1.0	0.6376	6	1	1	1.0
FR823450	Caudovirales	Myoviridae	Fletchervirus	382_0	Clustered	5	VC_382_0	5	0.8706	0.99999024	0.8706	1	1	1	1.0
FR852584	Caudovirales	Herelleviridae	Kayvirus	194_1	Clustered	25	VC_194_1	25	639	1.0	639	1	1	1	0.9967
GQ149088	Petitvirales	Microviridae	Alphatrevirus	339_0	Clustered	10	VC_339_0	10	717	1.0	717	1	1	1	1.0
GQ153916	Tubulavirales	Inoviridae	Inovirus	152_0	Clustered	12	VC_152_0	12	0.8841	1.0	0.8841	1	1	1	1.0
GQ153917	Tubulavirales	Inoviridae	Inovirus	152_0	Clustered	12	VC_152_0	12	0.8841	1.0	0.8841	1	1	1	1.0
GQ153919	Tubulavirales	Inoviridae	Inovirus	152_0	Clustered	12	VC_152_0	12	0.8841	1.0	0.8841	1	1	1	1.0
GQ241246	Caudovirales	Siphoviridae	Cimpunavirus	383_0	Clustered	3	VC_383_0	3	0.5877	0.98867275	0.5811	3	1	1	1.0
GQ303263	Caudovirales	Siphoviridae	Fromanvirus	209_1	Clustered	14	VC_209_1	14	0.2933	1.0	0.2933	1	1	1	989
GQ303265	Caudovirales	Siphoviridae	Kostyavirus	306_0	Clustered	9	VC_306_0	9	0.8478	1.0	0.8478	1	1	1	1.0
GQ398772	Caudovirales	Siphoviridae	Biseptimavirus	136_0	Clustered	24	VC_136_0	24	0.4703	1.0	0.4703	2	1	1	0.7717
GQ403789	Halopanivirales	Matshushitaviridae	Hukuchivirus	148_0	Clustered	2	VC_148_0	2	1.0	1.0	1.0	1	1	1	1.0
GQ413937	Caudovirales	Autographiviridae	Przondovirus	263_0	Clustered	25	VC_263_0	25	0.7384	1.0	0.7384	1	1	1	1.0
GQ413938	Caudovirales	Autographiviridae	Drulisvirus	188_0	Clustered	21	VC_188_0	21	0.7518	1.0	0.7518	3	1	1	1.0
GQ451696	Caudovirales	Siphoviridae	Unaquatrovirus	386_0	Clustered	5	VC_386_0	5	471	0.99999906	471	1	1	1	1.0
GQ478081	Caudovirales	Siphoviridae	Phifelvirus	319_0	Clustered	3	VC_319_0	3	0.7618	0.99426699	0.7574	1	1	1	1.0
GQ478084	Caudovirales	Siphoviridae	Phifelvirus	319_0	Clustered	3	VC_319_0	3	0.7618	0.99426699	0.7574	1	1	1	1.0
GQ478086	Caudovirales	Siphoviridae	Phifelvirus	319_0	Clustered	3	VC_319_0	3	0.7618	0.99426699	0.7574	1	1	1	1.0
GQ502199	Caudovirales	Siphoviridae	Dhillonvirus	71_0	Clustered	7	VC_71_0	7	0.5529	1.0	0.5529	1	1	1	1.0
GU060500	Caudovirales	Siphoviridae	Cheoctovirus	215_0	Clustered	25	VC_215_0	25	706	1.0	706	1	1	1	0.91
GU070616	Caudovirales	Myoviridae	Seunavirus	231_2	Clustered	2	VC_231_2	2	32	0.91283643	0.0292	1	1	1	1.0
GU071094	Caudovirales	Myoviridae	Thetisvirus	269_15	Clustered	3	VC_269_15	3	0.0347	0.98224295	0.0341	3	1	1	1.0
GU071096	Caudovirales	Myoviridae	Ahtivirus	269_19	Clustered/Singleton	1	VC_269_19	1	0.0	1.0	0.0	1	1	1	1.0
GU071100	Caudovirales	Autographiviridae	Tangaroavirus	235_0	Clustered	22	VC_235_0	22	825	1.0	825	19	1	1	1.0
GU071101	Caudovirales	Myoviridae	Eurybiavirus	269_14	Clustered	3	VC_269_14	3	0.0559	0.99841995	0.0558	1	1	1	1.0
GU071102	Caudovirales	Autographiviridae	Cheungvirus	235_0	Clustered	22	VC_235_0	22	825	1.0	825	19	1	1	1.0
GU071103	Caudovirales	Myoviridae	Palaemonvirus	269_1	Clustered/Singleton	1	VC_269_1	1	0.0	1.0	0.0	1	1	1	1.0
GU071104	Caudovirales	Autographiviridae	Tangaroavirus	235_0	Clustered	22	VC_235_0	22	825	1.0	825	19	1	1	1.0
GU071105	Caudovirales	Myoviridae	Vellamovirus	269_5	Clustered	2	VC_269_5	2	0.0207	0.94572258	0.0196	1	1	1	1.0
GU071106	Caudovirales	Myoviridae	Pontusvirus	269_15	Clustered	3	VC_269_15	3	0.0347	0.98224295	0.0341	3	1	1	1.0
GU071107	Caudovirales	Autographiviridae	Tritonvirus	235_0	Clustered	22	VC_235_0	22	825	1.0	825	19	1	1	1.0
GU071108	Caudovirales	Myoviridae	Brizovirus	269_17	Clustered	8	VC_269_17	8	0.1336	1.0	0.1336	4	1	1	0.75
GU075905	Caudovirales	Myoviridae	Eurybiavirus	269_14	Clustered	3	VC_269_14	3	0.0559	0.99841995	0.0558	1	1	1	1.0
GU196277	Caudovirales	Siphoviridae	Kagunavirus	333_0	Clustered	18	VC_333_0	18	0.8639	1.0	0.8639	3	1	1	1.0
GU196278	Caudovirales	Siphoviridae	Kagunavirus	333_0	Clustered	18	VC_333_0	18	0.8639	1.0	0.8639	3	1	1	1.0
GU196279	Caudovirales	Siphoviridae	Kagunavirus	333_0	Clustered	18	VC_333_0	18	0.8639	1.0	0.8639	3	1	1	1.0
GU196280	Caudovirales	Siphoviridae	Kagunavirus	333_0	Clustered	18	VC_333_0	18	0.8639	1.0	0.8639	3	1	1	1.0
GU229986	Caudovirales	Siphoviridae	Cecivirus	329_0	Clustered	2	VC_329_0	2	0.2839	0.94787514	0.2691	1	1	1	1.0
GU247132	Caudovirales	Siphoviridae	Fromanvirus	208_0	Clustered	25	VC_208_0	25	0.9329	1.0	0.9329	1	1	1	1.0
GU295964	Caudovirales	Myoviridae	Slopekvirus	291_0	Clustered	6	VC_291_0	6	0.1637	0.99999999	0.1637	1	1	1	1.0
GU296433	Caudovirales	Myoviridae	Fletchervirus	382_0	Clustered	5	VC_382_0	5	0.8706	0.99999024	0.8706	1	1	1	1.0
GU339467	Caudovirales	Siphoviridae	Fromanvirus	209_3	Clustered	10	VC_209_3	10	0.2088	1.0	0.2088	1	1	1	0.8889
GU459069	Caudovirales	Myoviridae	Ishigurovirus	225_1	Clustered/Singleton	1	VC_225_1	1	0.0	1.0	0.0	1	1	1	1.0
GU477322	Caudovirales	Siphoviridae	Dubowvirus	138_1	Clustered	19	VC_138_1	19	0.3014	1.0	0.3014	2	1	1	0.9766
GU580941	Caudovirales	Siphoviridae	Pepyhexavirus	372_0	Clustered	12	VC_372_0	12	0.6488	1.0	0.6488	4	1	1	0.9091
GU580942	Caudovirales	Siphoviridae	Pepyhexavirus	372_0	Clustered	12	VC_372_0	12	0.6488	1.0	0.6488	4	1	1	0.9091
GU583987	Caudovirales	Autographiviridae	Pifdecavirus	172_0	Clustered	19	VC_172_0	19	0.6376	1.0	0.6376	6	1	1	1.0
GU595417	Caudovirales	Autographiviridae	Zindervirus	273_0	Clustered	36	VC_273_0	36	1.0	1.0	1.0	12	1	1	1.0
GU815091	Caudovirales	Myoviridae	Pbunavirus	170_0	Clustered	25	VC_170_0	25	0.7661	1.0	0.7661	1	1	1	1.0
GU943054	Caudovirales	Autographiviridae	Pekhitvirus	235_0	Clustered	22	VC_235_0	22	825	1.0	825	19	1	1	1.0
GU967410	Caudovirales	Myoviridae	Anamdongvirus	157_0	Clustered	3	VC_157_0	3	0.1497	0.9834924	0.1472	3	2	1	1.0
GU988610	Caudovirales	Myoviridae	Pakpunavirus	164_0	Clustered	11	VC_164_0	11	0.6553	1.0	0.6553	1	1	1	1.0
HE584812	Caudovirales	Siphoviridae	Casadabanvirus	88_0	Clustered	8	VC_88_0	8	0.7688	1.0	0.7688	1	1	1	1.0
HE600015	Caudovirales	Ackermannviridae	Limestonevirus	192_2	Clustered	7	VC_192_2	7	0.0588	0.98661488	58	2	1	1	1.0
HE611333	Caudovirales	Podoviridae	Krylovvirus	283_0	Clustered	11	VC_283_0	11	875	1.0	875	4	1	1	1.0
HE775250	Caudovirales	Siphoviridae	Jerseyvirus	333_0	Clustered	18	VC_333_0	18	0.8639	1.0	0.8639	3	1	1	1.0
HE806280	Caudovirales	Myoviridae	Obolenskvirus	130_0	Clustered	8	VC_130_0	8	0.8972	1.0	0.8972	1	1	1	1.0
HE815464	Caudovirales	Myoviridae	Firehammervirus	381_0	Clustered	3	VC_381_0	3	0.6686	0.99549575	0.6656	1	1	1	1.0
HE956707	Caudovirales	Autographiviridae	Pienvirus	160_0	Clustered	14	VC_160_0	14	0.6396	1.0	0.6396	8	1	1	1.0
HE956708	Caudovirales	Demerecviridae	Haartmanvirus	296_3	Clustered/Singleton	1	VC_296_3	1	0.0	1.0	0.0	1	1	1	1.0
HE956710	Caudovirales	Autographiviridae	Pokrovskaiavirus	160_0	Clustered	14	VC_160_0	14	0.6396	1.0	0.6396	8	1	1	1.0
HE956711	Caudovirales	Myoviridae	Tequatrovirus	223_33	Clustered	2	VC_223_33	2	6	0.83610403	5	1	1	1	1.0
HE962497	Caudovirales	Siphoviridae	Saphexavirus	185_0	Clustered	5	VC_185_0	5	0.8939	0.99999728	0.8939	1	1	1	1.0
HE978309	Caudovirales	Myoviridae	Krischvirus	228_0	Clustered	5	VC_228_0	5	138	0.99999997	138	1	1	1	1.0
HE983845	Caudovirales	Myoviridae	Pakpunavirus	164_0	Clustered	11	VC_164_0	11	0.6553	1.0	0.6553	1	1	1	1.0
HF937074	Caudovirales	Rountreeviridae	Rosenblumvirus	181_0	Clustered	14	VC_181_0	14	0.7491	1.0	0.7491	2	1	1	1.0
HG007973	Tubulavirales	Inoviridae	Subteminivirus	272_0	Clustered	3	VC_272_0	3	0.5	0.0	0.0	3	1	1	1.0
HG315669	Tubulavirales	Inoviridae	Scuticavirus	204_0	Clustered	4	VC_204_0	4	0.9346	0.96743352	0.9041	3	1	1	1.0
HG518155	Caudovirales	Podoviridae	Bruynoghevirus	283_0	Clustered	11	VC_283_0	11	875	1.0	875	4	1	1	1.0
HG531805	Caudovirales	Myoviridae	Yongloolinvirus	336_2	Clustered	4	VC_336_2	4	0.3077	0.99996841	0.3077	1	1	1	1.0
HG793132	Caudovirales	Autographiviridae	Ampunavirus	159_0	Clustered	20	VC_159_0	20	0.4495	1.0	0.4495	15	1	1	1.0
HG796225	Caudovirales	Myoviridae	Sherbrookevirus	337_0	Clustered	6	VC_337_0	6	0.7111	1.0	0.7111	1	1	1	1.0
HG798901	Caudovirales	Myoviridae	Sherbrookevirus	337_0	Clustered	6	VC_337_0	6	0.7111	1.0	0.7111	1	1	1	1.0
HG813241	Caudovirales	Autographiviridae	Kayfunavirus	174_0	Clustered	19	VC_174_0	19	0.6886	1.0	0.6886	2	1	1	1.0
HG818823	Caudovirales	Autographiviridae	Kayfunavirus	174_0	Clustered	19	VC_174_0	19	0.6886	1.0	0.6886	2	1	1	1.0
HG818824	Caudovirales	Autographiviridae	Caroctavirus	174_0	Clustered	19	VC_174_0	19	0.6886	1.0	0.6886	2	1	1	1.0
HG962376	Caudovirales	Siphoviridae	Septimatrevirus	278_0	Clustered	7	VC_278_0	7	0.5424	1.0	0.5424	4	1	1	1.0
HM029250	Caudovirales	Siphoviridae	Audreyjarvisvirus	207_0	Clustered	7	VC_207_0	7	0.9991	0.99993057	0.9991	1	1	1	1.0
HM035024	Caudovirales	Drexlerviridae	Tunavirus	274_0	Clustered	18	VC_274_0	18	0.4852	1.0	0.4852	3	1	1	1.0
HM035025	Caudovirales	Myoviridae	Tequatrovirus	223_32	Clustered	5	VC_223_32	5	0.0242	0.99919761	0.0242	1	1	1	0.8
HM066936	Timlovirales	Steitzviridae	Cebevirus	212_0	Clustered	4	VC_212_0	4	1.0	1.0	1.0	3	3	2	1.0
HM134276	Caudovirales	Myoviridae	Pseudotevenvirus	291_1	Clustered	9	VC_291_1	9	0.2921	1.0	0.2921	1	1	1	1.0
HM151342	Caudovirales	Siphoviridae	Xiamenvirus	279_0	Clustered	2	VC_279_0	2	0.5164	0.94677468	489	1	1	1	1.0
HM152763	Caudovirales	Siphoviridae	Bronvirus	308_0	Clustered	4	VC_308_0	4	0.6108	0.99996976	0.6108	1	1	1	1.0
HM152764	Caudovirales	Siphoviridae	Timquatrovirus	214_0	Clustered	9	VC_214_0	9	0.8643	1.0	0.8643	1	1	1	1.0
HM152767	Caudovirales	Siphoviridae	Timquatrovirus	214_0	Clustered	9	VC_214_0	9	0.8643	1.0	0.8643	1	1	1	1.0
HM173637	Caudovirales	Siphoviridae	Saikungvirus	20_0	Clustered	16	VC_20_0	16	0.5544	1.0	0.5544	10	1	1	0.8917
HM208303	Caudovirales	Podoviridae	Traversvirus	108_0	Clustered	21	VC_108_0	21	0.7299	1.0	0.7299	3	1	1	0.8667
HM368260	Caudovirales	Myoviridae	Obolenskvirus	130_0	Clustered	8	VC_130_0	8	0.8972	1.0	0.8972	1	1	1	1.0
HM452125	Caudovirales	Myoviridae	Tulanevirus	229_0	Clustered	6	VC_229_0	6	0.1516	1.0	0.1516	2	1	1	1.0
HM480846	Caudovirales	Autographiviridae	Przondovirus	263_0	Clustered	25	VC_263_0	25	0.7384	1.0	0.7384	1	1	1	1.0
HM559717	Caudovirales	Autographiviridae	Poseidonvirus	235_0	Clustered	22	VC_235_0	22	825	1.0	825	19	1	1	1.0
HM568888	Caudovirales	Siphoviridae	Leicestervirus	388_0	Clustered	3	VC_388_0	3	0.5749	0.99729896	0.5733	1	1	1	1.0
HM624080	Caudovirales	Siphoviridae	Casadabanvirus	88_0	Clustered	8	VC_88_0	8	0.7688	1.0	0.7688	1	1	1	1.0
HM755814	Caudovirales	Siphoviridae	Fromanvirus	209_1	Clustered	14	VC_209_1	14	0.2933	1.0	0.2933	1	1	1	989
HM770079	Caudovirales	Myoviridae	Felsduovirus	27_0	Clustered	15	VC_27_0	15	0.3014	1.0	0.3014	2	2	2	1.0
HQ110083	Caudovirales	Myoviridae	Seongnamvirus	31_0	Clustered	21	VC_31_0	21	0.9045	1.0	0.9045	11	2	2	1.0
HQ110084	Caudovirales	Myoviridae	Entnonagintavirus	29_0	Clustered	32	VC_29_0	32	0.5208	1.0	0.5208	6	2	2	1.0
HQ127381	Caudovirales	Siphoviridae	Dubowvirus	138_1	Clustered	19	VC_138_1	19	0.3014	1.0	0.3014	2	1	1	0.9766
HQ163896	Caudovirales	Herelleviridae	Kayvirus	194_1	Clustered	25	VC_194_1	25	639	1.0	639	1	1	1	0.9967
HQ186308	Caudovirales	Autographiviridae	Friunavirus	390_0	Clustered	23	VC_390_0	23	1.0	1.0	1.0	3	1	1	1.0
HQ259103	Caudovirales	Ackermannviridae	Kuttervirus	192_1	Clustered	35	VC_192_1	35	0.4572	1.0	0.4572	1	1	1	1.0
HQ259105	Caudovirales	Schitoviridae	Gamaleyavirus	361_1	Clustered	26	VC_361_1	26	606	1.0	606	14	1	1	0.7323
HQ316584	Caudovirales	Autographiviridae	Banchanvirus	235_0	Clustered	22	VC_235_0	22	825	1.0	825	19	1	1	1.0
HQ317292	Caudovirales	Myoviridae	Nerrivikvirus	269_18	Clustered	2	VC_269_18	2	17	0.8863979	15	2	1	1	1.0
HQ317383	Caudovirales	Myoviridae	Tefnutvirus	269_18	Clustered	2	VC_269_18	2	17	0.8863979	15	2	1	1	1.0
HQ317388	Caudovirales	Autographiviridae	Kajamvirus	235_0	Clustered	22	VC_235_0	22	825	1.0	825	19	1	1	1.0
HQ317389	Caudovirales	Autographiviridae	Sednavirus	235_0	Clustered	22	VC_235_0	22	825	1.0	825	19	1	1	1.0
HQ317393	Caudovirales	Myoviridae	Schizotequatrovirus	226_0	Clustered	3	VC_226_0	3	0.1354	0.99858145	0.1352	1	1	1	1.0
HQ332137	Caudovirales	Autographiviridae	Tritonvirus	235_0	Clustered	22	VC_235_0	22	825	1.0	825	19	1	1	1.0
HQ332140	Caudovirales	Autographiviridae	Lingvirus	235_0	Clustered	22	VC_235_0	22	825	1.0	825	19	1	1	1.0
HQ337021	Caudovirales	Myoviridae	Ronodorvirus	269_20	Clustered	2	VC_269_20	2	0.0192	0.9503342	0.0183	1	1	1	1.0
HQ337022	Caudovirales	Autographiviridae	Tangaroavirus	235_0	Clustered	22	VC_235_0	22	825	1.0	825	19	1	1	1.0
HQ403646	Caudovirales	Siphoviridae	Emalynvirus	310_0	Clustered	4	VC_310_0	4	0.6462	0.99995995	0.6462	1	1	1	1.0
HQ406778	Caudovirales	Demerecviridae	Tequintavirus	295_1	Clustered	28	VC_295_1	28	0.5228	1.0	0.5228	1	1	1	0.9974
HQ633062	Caudovirales	Autographiviridae	Lirvirus	235_0	Clustered	22	VC_235_0	22	825	1.0	825	19	1	1	1.0
HQ633071	Caudovirales	Myoviridae	Llyrvirus	269_12	Clustered/Singleton	1	VC_269_12	1	0.0	1.0	0.0	1	1	1	1.0
HQ634174	Caudovirales	Myoviridae	Eurybiavirus	269_14	Clustered	3	VC_269_14	3	0.0559	0.99841995	0.0558	1	1	1	1.0
HQ634177	Caudovirales	Myoviridae	Anaposvirus	269_4	Clustered	2	VC_269_4	2	22	0.94827112	0.0209	2	1	1	1.0
HQ634189	Caudovirales	Myoviridae	Leucotheavirus	269_15	Clustered	3	VC_269_15	3	0.0347	0.98224295	0.0341	3	1	1	1.0
HQ634194	Caudovirales	Schitoviridae	Stoningtonvirus	363_0	Clustered	3	VC_363_0	3	0.1009	0.99845019	0.1007	3	1	1	1.0
HQ641340	Caudovirales	Autographiviridae	Chatterjeevirus	177_0	Clustered	3	VC_177_0	3	0.0505	0.99856053	0.0505	1	1	1	1.0
HQ641345	Caudovirales	Zobellviridae	Icepovirus	233_0	Clustered	5	VC_233_0	5	0.4871	0.99997176	0.4871	5	1	1	1.0
HQ641380	Caudovirales	Schitoviridae	Eceepunavirus	361_0	Clustered	2	VC_361_0	2	0.0121	0.8592135	0.0104	2	1	1	1.0
HQ665011	Caudovirales	Demerecviridae	Tequintavirus	295_1	Clustered	28	VC_295_1	28	0.5228	1.0	0.5228	1	1	1	0.9974
HQ711985	Caudovirales	Siphoviridae	Detrevirus	55_0	Clustered	2	VC_55_0	2	0.4619	0.94779222	0.4378	1	1	1	1.0
HQ728263	Caudovirales	Myoviridae	Kolesnikvirus	240_0	Clustered	2	VC_240_0	2	0.0493	0.95249915	47	1	1	1	1.0
HQ728264	Caudovirales	Chaseviridae	Loessnervirus	368_0	Clustered	11	VC_368_0	11	0.8553	1.0	0.8553	6	1	1	1.0
HQ728265	Caudovirales	Autographiviridae	Elunavirus	178_0	Clustered	44	VC_178_0	44	0.6136	1.0	0.6136	9	1	1	1.0
HQ728266	Caudovirales	Schitoviridae	Waedenswilvirus	361_0	Clustered	2	VC_361_0	2	0.0121	0.8592135	0.0104	2	1	1	1.0
HQ728524	Caudovirales	Siphoviridae	Cheoctovirus	215_0	Clustered	25	VC_215_0	25	706	1.0	706	1	1	1	0.91
HQ832595	Caudovirales	Myoviridae	Pakpunavirus	164_0	Clustered	11	VC_164_0	11	0.6553	1.0	0.6553	1	1	1	1.0
HQ918180	Caudovirales	Myoviridae	Slopekvirus	291_0	Clustered	6	VC_291_0	6	0.1637	0.99999999	0.1637	1	1	1	1.0
J02448	Tubulavirales	Inoviridae	Inovirus	152_0	Clustered	12	VC_152_0	12	0.8841	1.0	0.8841	1	1	1	1.0
J02451	Tubulavirales	Inoviridae	Inovirus	152_0	Clustered	12	VC_152_0	12	0.8841	1.0	0.8841	1	1	1	1.0
JF501022	Caudovirales	Drexlerviridae	Webervirus	321_0	Clustered	31	VC_321_0	31	0.9569	1.0	0.9569	1	1	1	1.0
JF704092	Caudovirales	Myoviridae	Bixzunavirus	311_0	Clustered	7	VC_311_0	7	998	0.99999972	998	1	1	1	1.0
JF704093	Caudovirales	Siphoviridae	Fromanvirus	209_1	Clustered	14	VC_209_1	14	0.2933	1.0	0.2933	1	1	1	989
JF704094	Caudovirales	Siphoviridae	Coopervirus	255_1	Clustered	13	VC_255_1	13	0.4839	1.0	0.4839	2	1	1	1.0
JF704097	Caudovirales	Siphoviridae	Fromanvirus	209_2	Clustered	4	VC_209_2	4	0.1111	0.99998327	0.1111	1	1	1	1.0
JF704098	Caudovirales	Siphoviridae	Fromanvirus	209_1	Clustered	14	VC_209_1	14	0.2933	1.0	0.2933	1	1	1	989
JF704100	Caudovirales	Siphoviridae	Marvinvirus	303_0	Clustered	2	VC_303_0	2	0.8199	0.94172064	0.7721	1	1	1	1.0
JF704101	Caudovirales	Siphoviridae	Fromanvirus	209_1	Clustered	14	VC_209_1	14	0.2933	1.0	0.2933	1	1	1	989
JF704104	Caudovirales	Siphoviridae	Coopervirus	255_1	Clustered	13	VC_255_1	13	0.4839	1.0	0.4839	2	1	1	1.0
JF704106	Caudovirales	Siphoviridae	Timquatrovirus	214_0	Clustered	9	VC_214_0	9	0.8643	1.0	0.8643	1	1	1	1.0
JF704107	Caudovirales	Siphoviridae	Fromanvirus	209_0	Clustered	6	VC_209_0	6	0.1478	1.0	0.1478	1	1	1	1.0
JF704108	Caudovirales	Siphoviridae	Bronvirus	308_0	Clustered	4	VC_308_0	4	0.6108	0.99996976	0.6108	1	1	1	1.0
JF704110	Caudovirales	Siphoviridae	Fromanvirus	209_3	Clustered	10	VC_209_3	10	0.2088	1.0	0.2088	1	1	1	0.8889
JF704111	Caudovirales	Siphoviridae	Fromanvirus	209_1	Clustered	14	VC_209_1	14	0.2933	1.0	0.2933	1	1	1	989
JF704117	Caudovirales	Siphoviridae	Cheoctovirus	215_0	Clustered	25	VC_215_0	25	706	1.0	706	1	1	1	0.91
JF712866	Caudovirales	Podoviridae	Enhodamvirus	327_0	Clustered	3	VC_327_0	3	1.0	1.0	1.0	1	1	1	1.0
JF719732	Tubulavirales	Inoviridae	Inovirus	152_0	Clustered	12	VC_152_0	12	0.8841	1.0	0.8841	1	1	1	1.0
JF719733	Tubulavirales	Inoviridae	Inovirus	152_0	Clustered	12	VC_152_0	12	0.8841	1.0	0.8841	1	1	1	1.0
JF719734	Tubulavirales	Inoviridae	Inovirus	152_0	Clustered	12	VC_152_0	12	0.8841	1.0	0.8841	1	1	1	1.0
JF731128	Caudovirales	Siphoviridae	Saphexavirus	185_0	Clustered	5	VC_185_0	5	0.8939	0.99999728	0.8939	1	1	1	1.0
JF744988	Caudovirales	Siphoviridae	Bronvirus	308_0	Clustered	4	VC_308_0	4	0.6108	0.99996976	0.6108	1	1	1	1.0
JF770475	Caudovirales	Drexlerviridae	Lindendrivevirus	275_0	Clustered	18	VC_275_0	18	0.5723	1.0	0.5723	9	1	1	1.0
JF912400	Caudovirales	Drexlerviridae	Kyungwonvirus	276_0	Clustered	39	VC_276_0	39	0.7136	1.0	0.7136	9	1	1	807
JF937090	Caudovirales	Siphoviridae	Omegavirus	217_0	Clustered	2	VC_217_0	2	0.0783	0.94316417	0.0739	1	1	1	1.0
JF937091	Caudovirales	Siphoviridae	Kostyavirus	306_0	Clustered	9	VC_306_0	9	0.8478	1.0	0.8478	1	1	1	1.0
JF937093	Caudovirales	Siphoviridae	Cheoctovirus	215_0	Clustered	25	VC_215_0	25	706	1.0	706	1	1	1	0.91
JF937094	Caudovirales	Siphoviridae	Fromanvirus	209_2	Clustered	4	VC_209_2	4	0.1111	0.99998327	0.1111	1	1	1	1.0
JF937098	Caudovirales	Siphoviridae	Cheoctovirus	215_0	Clustered	25	VC_215_0	25	706	1.0	706	1	1	1	0.91
JF937099	Caudovirales	Siphoviridae	Fromanvirus	208_0	Clustered	25	VC_208_0	25	0.9329	1.0	0.9329	1	1	1	1.0
JF937100	Caudovirales	Siphoviridae	Fromanvirus	208_0	Clustered	25	VC_208_0	25	0.9329	1.0	0.9329	1	1	1	1.0
JF937101	Caudovirales	Siphoviridae	Omegavirus	217_2	Clustered	2	VC_217_2	2	0.0737	0.94510752	0.0697	1	1	1	1.0
JF937102	Caudovirales	Siphoviridae	Cheoctovirus	215_0	Clustered	25	VC_215_0	25	706	1.0	706	1	1	1	0.91
JF937103	Caudovirales	Siphoviridae	Fromanvirus	208_0	Clustered	25	VC_208_0	25	0.9329	1.0	0.9329	1	1	1	1.0
JF937104	Caudovirales	Siphoviridae	Timquatrovirus	214_0	Clustered	9	VC_214_0	9	0.8643	1.0	0.8643	1	1	1	1.0
JF937105	Caudovirales	Siphoviridae	Reyvirus	307_0	Clustered	2	VC_307_0	2	0.4086	0.944686	386	2	1	1	1.0
JF937106	Caudovirales	Siphoviridae	Kostyavirus	306_0	Clustered	9	VC_306_0	9	0.8478	1.0	0.8478	1	1	1	1.0
JF937108	Caudovirales	Siphoviridae	Fromanvirus	208_0	Clustered	25	VC_208_0	25	0.9329	1.0	0.9329	1	1	1	1.0
JF937110	Caudovirales	Siphoviridae	Fromanvirus	208_0	Clustered	25	VC_208_0	25	0.9329	1.0	0.9329	1	1	1	1.0
JF939047	Caudovirales	Siphoviridae	Kilunavirus	278_0	Clustered	7	VC_278_0	7	0.5424	1.0	0.5424	4	1	1	1.0
JF946695	Caudovirales	Siphoviridae	Fromanvirus	209_3	Clustered	10	VC_209_3	10	0.2088	1.0	0.2088	1	1	1	0.8889
JF957057	Caudovirales	Siphoviridae	Fromanvirus	208_0	Clustered	25	VC_208_0	25	0.9329	1.0	0.9329	1	1	1	1.0
JF957058	Caudovirales	Siphoviridae	Fromanvirus	209_1	Clustered	14	VC_209_1	14	0.2933	1.0	0.2933	1	1	1	989
JF957059	Caudovirales	Siphoviridae	Omegavirus	217_0	Clustered	2	VC_217_0	2	0.0783	0.94316417	0.0739	1	1	1	1.0
JF957060	Caudovirales	Siphoviridae	Fromanvirus	209_1	Clustered	14	VC_209_1	14	0.2933	1.0	0.2933	1	1	1	989
JF966203	Caudovirales	Herelleviridae	Bastillevirus	205_4	Clustered	4	VC_205_4	4	0.0789	0.99998373	0.0789	1	1	1	1.0
JF974294	Caudovirales	Siphoviridae	Roufvirus	36_0	Clustered	6	VC_36_0	6	0.1966	0.99998807	0.1966	2	2	2	0.6
JF974296	Caudovirales	Schitoviridae	Matsuvirus	363_0	Clustered	3	VC_363_0	3	0.1009	0.99845019	0.1007	3	1	1	1.0
JN006061	Caudovirales	Siphoviridae	Kostyavirus	306_0	Clustered	9	VC_306_0	9	0.8478	1.0	0.8478	1	1	1	1.0
JN020140	Caudovirales	Siphoviridae	Fromanvirus	208_0	Clustered	25	VC_208_0	25	0.9329	1.0	0.9329	1	1	1	1.0
JN020141	Caudovirales	Siphoviridae	Cheoctovirus	215_0	Clustered	25	VC_215_0	25	706	1.0	706	1	1	1	0.91
JN020142	Caudovirales	Siphoviridae	Cheoctovirus	215_0	Clustered	25	VC_215_0	25	706	1.0	706	1	1	1	0.91
JN020143	Caudovirales	Siphoviridae	Cheoctovirus	215_0	Clustered	25	VC_215_0	25	706	1.0	706	1	1	1	0.91
JN022534	Caudovirales	Myoviridae	Dibbivirus	318_0	Clustered	3	VC_318_0	3	0.5221	0.99845225	0.5212	1	1	1	1.0
JN035618	Caudovirales	Siphoviridae	Getseptimavirus	392_1	Clustered	4	VC_392_1	4	129	0.97264043	0.1254	2	1	1	1.0
JN049605	Caudovirales	Siphoviridae	Fromanvirus	209_2	Clustered	4	VC_209_2	4	0.1111	0.99998327	0.1111	1	1	1	1.0
JN051154	Caudovirales	Siphoviridae	Coetzeevirus	292_0	Clustered	3	VC_292_0	3	0.9198	0.99054823	0.9111	1	1	1	1.0
JN083852	Caudovirales	Siphoviridae	Fromanvirus	209_0	Clustered	6	VC_209_0	6	0.1478	1.0	0.1478	1	1	1	1.0
JN126049	Caudovirales	Ackermannviridae	Kuttervirus	192_1	Clustered	35	VC_192_1	35	0.4572	1.0	0.4572	1	1	1	1.0
JN132397	Caudovirales	Myoviridae	Fletchervirus	382_0	Clustered	5	VC_382_0	5	0.8706	0.99999024	0.8706	1	1	1	1.0
JN153085	Caudovirales	Siphoviridae	Fromanvirus	208_0	Clustered	25	VC_208_0	25	0.9329	1.0	0.9329	1	1	1	1.0
JN153086	Caudovirales	Siphoviridae	Fromanvirus	208_0	Clustered	25	VC_208_0	25	0.9329	1.0	0.9329	1	1	1	1.0
JN185608	Caudovirales	Siphoviridae	Timquatrovirus	214_0	Clustered	9	VC_214_0	9	0.8643	1.0	0.8643	1	1	1	1.0
JN201525	Caudovirales	Siphoviridae	Omegavirus	217_1	Clustered/Singleton	1	VC_217_1	1	0.0	1.0	0.0	1	1	1	1.0
JN202312	Caudovirales	Myoviridae	Tequatrovirus	223_32	Clustered	5	VC_223_32	5	0.0242	0.99919761	0.0242	1	1	1	0.8
JN204348	Caudovirales	Myoviridae	Bixzunavirus	311_0	Clustered	7	VC_311_0	7	998	0.99999972	998	1	1	1	1.0
JN225449	Caudovirales	Myoviridae	Felixounavirus	241_0	Clustered	23	VC_241_0	23	0.9281	1.0	0.9281	3	1	1	1.0
JN243855	Caudovirales	Siphoviridae	Timquatrovirus	214_0	Clustered	9	VC_214_0	9	0.8643	1.0	0.8643	1	1	1	1.0
JN254800	Caudovirales	Myoviridae	Pbunavirus	170_0	Clustered	25	VC_170_0	25	0.7661	1.0	0.7661	1	1	1	1.0
JN256079	Caudovirales	Siphoviridae	Charlievirus	304_0	Clustered	9	VC_304_0	9	0.4789	1.0	0.4789	3	1	1	1.0
JN371768	Caudovirales	Myoviridae	Namakavirus	269_17	Clustered	8	VC_269_17	8	0.1336	1.0	0.1336	4	1	1	0.75
JN377894	Caudovirales	Myoviridae	Tulanevirus	229_0	Clustered	6	VC_229_0	6	0.1516	1.0	0.1516	2	1	1	1.0
JN377895	Caudovirales	Myoviridae	Tulanevirus	229_0	Clustered	6	VC_229_0	6	0.1516	1.0	0.1516	2	1	1	1.0
JN391180	Caudovirales	Podoviridae	Uetakevirus	39_0	Clustered	5	VC_39_0	5	0.8527	0.99999789	0.8527	2	2	2	1.0
JN398368	Caudovirales	Siphoviridae	Cheoctovirus	215_0	Clustered	25	VC_215_0	25	706	1.0	706	1	1	1	0.91
JN398369	Caudovirales	Siphoviridae	Fromanvirus	208_0	Clustered	25	VC_208_0	25	0.9329	1.0	0.9329	1	1	1	1.0
JN408459	Caudovirales	Siphoviridae	Fromanvirus	209_0	Clustered	6	VC_209_0	6	0.1478	1.0	0.1478	1	1	1	1.0
JN408460	Caudovirales	Siphoviridae	Fromanvirus	209_3	Clustered	10	VC_209_3	10	0.2088	1.0	0.2088	1	1	1	0.8889
JN408461	Caudovirales	Siphoviridae	Fromanvirus	209_3	Clustered	10	VC_209_3	10	0.2088	1.0	0.2088	1	1	1	0.8889
JN412588	Caudovirales	Myoviridae	Bixzunavirus	311_0	Clustered	7	VC_311_0	7	998	0.99999972	998	1	1	1	1.0
JN412590	Caudovirales	Siphoviridae	Kostyavirus	306_0	Clustered	9	VC_306_0	9	0.8478	1.0	0.8478	1	1	1	1.0
JN412591	Caudovirales	Siphoviridae	Bignuzvirus	301_0	Clustered	7	VC_301_0	7	0.4656	1.0	0.4656	3	1	1	1.0
JN412593	Caudovirales	Siphoviridae	Liefievirus	213_0	Clustered	2	VC_213_0	2	0.2979	0.94824791	0.2825	1	1	1	1.0
JN542517	Caudovirales	Siphoviridae	Cheoctovirus	215_0	Clustered	25	VC_215_0	25	706	1.0	706	1	1	1	0.91
JN572061	Caudovirales	Siphoviridae	Fishburnevirus	301_0	Clustered	7	VC_301_0	7	0.4656	1.0	0.4656	3	1	1	1.0
JN572689	Caudovirales	Siphoviridae	Fromanvirus	208_0	Clustered	25	VC_208_0	25	0.9329	1.0	0.9329	1	1	1	1.0
JN593240	Caudovirales	Ackermannviridae	Kuttervirus	192_1	Clustered	35	VC_192_1	35	0.4572	1.0	0.4572	1	1	1	1.0
JN624851	Caudovirales	Siphoviridae	Redivirus	304_0	Clustered	9	VC_304_0	9	0.4789	1.0	0.4789	3	1	1	1.0
JN638751	Caudovirales	Myoviridae	Donellivirus	394_0	Clustered/Singleton	1	VC_394_0	1	0.0	1.0	0.0	1	1	1	1.0
JN641803	Caudovirales	Myoviridae	Seoulvirus	246_0	Clustered	5	VC_246_0	5	0.5096	0.99999981	0.5096	4	1	1	1.0
JN651747	Caudovirales	Autographiviridae	Aerosvirus	160_0	Clustered	14	VC_160_0	14	0.6396	1.0	0.6396	8	1	1	1.0
JN673056	Caudovirales	Ackermannviridae	Kuttervirus	192_1	Clustered	35	VC_192_1	35	0.4572	1.0	0.4572	1	1	1	1.0
JN680858	Caudovirales	Siphoviridae	Bronvirus	308_0	Clustered	4	VC_308_0	4	0.6108	0.99996976	0.6108	1	1	1	1.0
JN687951	Caudovirales	Siphoviridae	Fromanvirus	208_0	Clustered	25	VC_208_0	25	0.9329	1.0	0.9329	1	1	1	1.0
JN698992	Caudovirales	Siphoviridae	Pipefishvirus	255_0	Clustered	4	VC_255_0	4	0.1688	0.9999794	0.1688	1	1	1	1.0
JN698993	Caudovirales	Siphoviridae	Corndogvirus	302_0	Clustered	2	VC_302_0	2	0.2626	0.95536031	0.2509	1	1	1	1.0
JN698996	Caudovirales	Siphoviridae	Cheoctovirus	215_0	Clustered	25	VC_215_0	25	706	1.0	706	1	1	1	0.91
JN698997	Caudovirales	Siphoviridae	Omegavirus	217_3	Clustered/Singleton	1	VC_217_3	1	0.0	1.0	0.0	1	1	1	1.0
JN698998	Caudovirales	Siphoviridae	Fromanvirus	208_0	Clustered	25	VC_208_0	25	0.9329	1.0	0.9329	1	1	1	1.0
JN699000	Caudovirales	Siphoviridae	Fromanvirus	208_0	Clustered	25	VC_208_0	25	0.9329	1.0	0.9329	1	1	1	1.0
JN699003	Caudovirales	Siphoviridae	Pipefishvirus	255_0	Clustered	4	VC_255_0	4	0.1688	0.9999794	0.1688	1	1	1	1.0
JN699005	Caudovirales	Siphoviridae	Fromanvirus	209_3	Clustered	10	VC_209_3	10	0.2088	1.0	0.2088	1	1	1	0.8889
JN699007	Caudovirales	Siphoviridae	Acadianvirus	255_1	Clustered	13	VC_255_1	13	0.4839	1.0	0.4839	2	1	1	1.0
JN699011	Caudovirales	Siphoviridae	Coopervirus	255_1	Clustered	13	VC_255_1	13	0.4839	1.0	0.4839	2	1	1	1.0
JN699012	Caudovirales	Siphoviridae	Cheoctovirus	215_0	Clustered	25	VC_215_0	25	706	1.0	706	1	1	1	0.91
JN699015	Caudovirales	Siphoviridae	Fromanvirus	209_1	Clustered	14	VC_209_1	14	0.2933	1.0	0.2933	1	1	1	989
JN699016	Caudovirales	Siphoviridae	Fromanvirus	208_0	Clustered	25	VC_208_0	25	0.9329	1.0	0.9329	1	1	1	1.0
JN699019	Caudovirales	Siphoviridae	Fromanvirus	209_2	Clustered	4	VC_209_2	4	0.1111	0.99998327	0.1111	1	1	1	1.0
JN699627	Caudovirales	Myoviridae	Bixzunavirus	311_0	Clustered	7	VC_311_0	7	998	0.99999972	998	1	1	1	1.0
JN699628	Caudovirales	Siphoviridae	Bongovirus	307_0	Clustered	2	VC_307_0	2	0.4086	0.944686	386	2	1	1	1.0
JN712910	Caudovirales	Myoviridae	Becedseptimavirus	396_0	Clustered	2	VC_396_0	2	0.7515	0.81445332	0.6121	2	1	1	1.0
JN790865	Caudovirales	Herelleviridae	Bequatrovirus	205_6	Clustered	2	VC_205_6	2	24	0.93251128	0.0224	1	1	1	1.0
JN797796	Caudovirales	Herelleviridae	Bequatrovirus	205_6	Clustered	2	VC_205_6	2	24	0.93251128	0.0224	1	1	1	1.0
JN797797	Caudovirales	Herelleviridae	Tsarbombavirus	205_0	Clustered	3	VC_205_0	3	0.0521	0.99842482	52	1	1	1	1.0
JN797798	Caudovirales	Herelleviridae	Tsarbombavirus	205_0	Clustered	3	VC_205_0	3	0.0521	0.99842482	52	1	1	1	1.0
JN800508	Caudovirales	Guelinviridae	Gregsiragusavirus	398_0	Clustered	3	VC_398_0	3	0.5025	0.99554907	0.5002	1	1	1	1.0
JN808773	Caudovirales	Siphoviridae	Casadabanvirus	88_0	Clustered	8	VC_88_0	8	0.7688	1.0	0.7688	1	1	1	1.0
JN831653	Caudovirales	Siphoviridae	Timquatrovirus	214_0	Clustered	9	VC_214_0	9	0.8643	1.0	0.8643	1	1	1	1.0
JN831654	Caudovirales	Siphoviridae	Fromanvirus	209_0	Clustered	6	VC_209_0	6	0.1478	1.0	0.1478	1	1	1	1.0
JN859129	Caudovirales	Siphoviridae	Cheoctovirus	215_0	Clustered	25	VC_215_0	25	706	1.0	706	1	1	1	0.91
JN871591	Caudovirales	Siphoviridae	Chivirus	324_0	Clustered	14	VC_324_0	14	0.7438	1.0	0.7438	1	1	1	1.0
JN882284	Caudovirales	Myoviridae	Seunavirus	231_3	Clustered	2	VC_231_3	2	0.0331	0.90758062	0.03	1	1	1	1.0
JN882285	Caudovirales	Myoviridae	Mimasvirus	202_0	Clustered/Singleton	1	VC_202_0	1	0.0	1.0	0.0	1	1	1	1.0
JN882287	Caudovirales	Myoviridae	Pseudotevenvirus	291_1	Clustered	9	VC_291_1	9	0.2921	1.0	0.2921	1	1	1	1.0
JN882298	Caudovirales	Autographiviridae	Ermolevavirus	159_0	Clustered	20	VC_159_0	20	0.4495	1.0	0.4495	15	1	1	1.0
JN939331	Caudovirales	Podoviridae	Perisivirus	399_0	Clustered	2	VC_399_0	2	1.0	1.0	1.0	1	1	1	1.0
JN939332	Caudovirales	Podoviridae	Perisivirus	399_0	Clustered	2	VC_399_0	2	1.0	1.0	1.0	1	1	1	1.0
JN984867	Caudovirales	Siphoviridae	Dhillonvirus	71_0	Clustered	7	VC_71_0	7	0.5529	1.0	0.5529	1	1	1	1.0
JN986844	Caudovirales	Autographiviridae	Vectrevirus	273_0	Clustered	36	VC_273_0	36	1.0	1.0	1.0	12	1	1	1.0
JN986845	Caudovirales	Drexlerviridae	Guelphvirus	275_0	Clustered	18	VC_275_0	18	0.5723	1.0	0.5723	9	1	1	1.0
JN986846	Caudovirales	Myoviridae	Tequatrovirus	223_28	Clustered/Singleton	1	VC_223_28	1	0.0	1.0	0.0	1	1	1	1.0
JN991020	Caudovirales	Autographiviridae	Bifseptvirus	159_0	Clustered	20	VC_159_0	20	0.4495	1.0	0.4495	15	1	1	1.0
JQ007353	Caudovirales	Siphoviridae	Jerseyvirus	333_0	Clustered	18	VC_333_0	18	0.8639	1.0	0.8639	3	1	1	1.0
JQ011318	Caudovirales	Podoviridae	Oslovirus	108_0	Clustered	21	VC_108_0	21	0.7299	1.0	0.7299	3	1	1	0.8667
JQ086369	Caudovirales	Siphoviridae	Wanchaivirus	20_0	Clustered	16	VC_20_0	16	0.5544	1.0	0.5544	10	1	1	0.8917
JQ086370	Caudovirales	Siphoviridae	Yautsimvirus	20_0	Clustered	16	VC_20_0	16	0.5544	1.0	0.5544	10	1	1	0.8917
JQ086372	Caudovirales	Siphoviridae	Kwaitsingvirus	20_0	Clustered	16	VC_20_0	16	0.5544	1.0	0.5544	10	1	1	0.8917
JQ086373	Caudovirales	Siphoviridae	Wongtaivirus	20_0	Clustered	16	VC_20_0	16	0.5544	1.0	0.5544	10	1	1	0.8917
JQ086374	Caudovirales	Siphoviridae	Kwaitsingvirus	20_0	Clustered	16	VC_20_0	16	0.5544	1.0	0.5544	10	1	1	0.8917
JQ086375	Caudovirales	Siphoviridae	Dhillonvirus	71_0	Clustered	7	VC_71_0	7	0.5529	1.0	0.5529	1	1	1	1.0
JQ086377	Caudovirales	Siphoviridae	Saikungvirus	20_0	Clustered	16	VC_20_0	16	0.5544	1.0	0.5544	10	1	1	0.8917
JQ182726	Caudovirales	Siphoviridae	Shamshuipovirus	20_0	Clustered	16	VC_20_0	16	0.5544	1.0	0.5544	10	1	1	0.8917
JQ182727	Caudovirales	Siphoviridae	Cuauhtlivirus	20_0	Clustered	16	VC_20_0	16	0.5544	1.0	0.5544	10	1	1	0.8917
JQ182731	Caudovirales	Siphoviridae	Nochtlivirus	20_0	Clustered	16	VC_20_0	16	0.5544	1.0	0.5544	10	1	1	0.8917
JQ182732	Caudovirales	Siphoviridae	Wanchaivirus	20_0	Clustered	16	VC_20_0	16	0.5544	1.0	0.5544	10	1	1	0.8917
JQ182733	Caudovirales	Siphoviridae	Aguilavirus	20_0	Clustered	16	VC_20_0	16	0.5544	1.0	0.5544	10	1	1	0.8917
JQ182734	Caudovirales	Siphoviridae	Aguilavirus	20_0	Clustered	16	VC_20_0	16	0.5544	1.0	0.5544	10	1	1	0.8917
JQ182736	Caudovirales	Drexlerviridae	Rogunavirus	275_0	Clustered	18	VC_275_0	18	0.5723	1.0	0.5723	9	1	1	1.0
JQ245707	Caudovirales	Myoviridae	Aurunvirus	270_0	Clustered/Singleton	1	VC_270_0	1	0.0	1.0	0.0	1	1	1	1.0
JQ267518	Caudovirales	Autographiviridae	Koutsourovirus	188_0	Clustered	21	VC_188_0	21	0.7518	1.0	0.7518	3	1	1	1.0
JQ300538	Caudovirales	Siphoviridae	Cheoctovirus	215_0	Clustered	25	VC_215_0	25	706	1.0	706	1	1	1	0.91
JQ307387	Caudovirales	Siphoviridae	Septimatrevirus	278_0	Clustered	7	VC_278_0	7	0.5424	1.0	0.5424	4	1	1	1.0
JQ309827	Caudovirales	Rountreeviridae	Copernicusvirus	183_0	Clustered	11	VC_183_0	11	0.7107	1.0	0.7107	1	1	1	1.0
JQ312117	Caudovirales	Myoviridae	Schmittlotzvirus	72_0	Clustered	2	VC_72_0	2	0.1107	0.94172064	0.1042	2	2	1	1.0
JQ408219	Tubulavirales	Inoviridae	Restivirus	151_0	Clustered	4	VC_151_0	4	0.9538	0.99374885	0.9478	1	1	1	1.0
JQ446452	Caudovirales	Zobellviridae	Salinovirus	233_0	Clustered	5	VC_233_0	5	0.4871	0.99997176	0.4871	5	1	1	1.0
JQ512844	Caudovirales	Siphoviridae	Fromanvirus	209_1	Clustered	14	VC_209_1	14	0.2933	1.0	0.2933	1	1	1	989
JQ513383	Caudovirales	Myoviridae	Alcyoneusvirus	202_5	Clustered/Singleton	1	VC_202_5	1	0.0	1.0	0.0	1	1	1	1.0
JQ617284	Caudovirales	Podoviridae	Schmidvirus	184_0	Clustered	3	VC_184_0	3	1.0	1.0	1.0	1	1	1	1.0
JQ619704	Caudovirales	Siphoviridae	Pebcunavirus	250_0	Clustered	3	VC_250_0	3	0.4673	0.99830537	0.4665	2	1	1	1.0
JQ659259	Caudovirales	Siphoviridae	Limdunavirus	385_0	Clustered	7	VC_385_0	7	0.6714	1.0	0.6714	1	1	1	1.0
JQ684677	Caudovirales	Siphoviridae	Fromanvirus	209_0	Clustered	6	VC_209_0	6	0.1478	1.0	0.1478	1	1	1	1.0
JQ686190	Caudovirales	Herelleviridae	Kayvirus	194_1	Clustered	25	VC_194_1	25	639	1.0	639	1	1	1	0.9967
JQ692107	Caudovirales	Siphoviridae	Mardecavirus	281_0	Clustered	2	VC_281_0	2	0.9021	0.93003234	839	1	1	1	1.0
JQ698665	Caudovirales	Siphoviridae	Fromanvirus	208_0	Clustered	25	VC_208_0	25	0.9329	1.0	0.9329	1	1	1	1.0
JQ729990	Caudovirales	Guelinviridae	Brucesealvirus	397_0	Clustered	4	VC_397_0	4	0.6384	0.9997723	0.6383	1	1	1	1.0
JQ729991	Caudovirales	Guelinviridae	Brucesealvirus	397_0	Clustered	4	VC_397_0	4	0.6384	0.9997723	0.6383	1	1	1	1.0
JQ729992	Caudovirales	Guelinviridae	Brucesealvirus	397_0	Clustered	4	VC_397_0	4	0.6384	0.9997723	0.6383	1	1	1	1.0
JQ740787	Caudovirales	Siphoviridae	Skunavirus	206_0	Clustered	95	VC_206_0	95	0.9999	1.0	0.9999	2	1	1	1.0
JQ740788	Caudovirales	Siphoviridae	Skunavirus	206_0	Clustered	95	VC_206_0	95	0.9999	1.0	0.9999	2	1	1	1.0
JQ740789	Caudovirales	Siphoviridae	Skunavirus	206_0	Clustered	95	VC_206_0	95	0.9999	1.0	0.9999	2	1	1	1.0
JQ740804	Caudovirales	Siphoviridae	Skunavirus	206_0	Clustered	95	VC_206_0	95	0.9999	1.0	0.9999	2	1	1	1.0
JQ740813	Caudovirales	Siphoviridae	Skunavirus	206_0	Clustered	95	VC_206_0	95	0.9999	1.0	0.9999	2	1	1	1.0
JQ797329	Caudovirales	Herelleviridae	Pecentumvirus	287_0	Clustered	13	VC_287_0	13	0.6972	1.0	0.6972	1	1	1	1.0
JQ809650	Caudovirales	Zobellviridae	Siovirus	234_0	Clustered	4	VC_234_0	4	0.8029	0.9998533	0.8028	2	1	1	1.0
JQ823122	Caudovirales	Siphoviridae	Inhavirus	400_0	Clustered	2	VC_400_0	2	1.0	1.0	1.0	1	1	1	1.0
JQ823123	Caudovirales	Siphoviridae	Inhavirus	400_0	Clustered	2	VC_400_0	2	1.0	1.0	1.0	1	1	1	1.0
JQ837901	Caudovirales	Autographiviridae	Axomammavirus	273_0	Clustered	36	VC_273_0	36	1.0	1.0	1.0	12	1	1	1.0
JQ957932	Caudovirales	Siphoviridae	Triavirus	137_0	Clustered	23	VC_137_0	23	0.6591	1.0	0.6591	1	1	1	1.0
JQ965700	Caudovirales	Autographiviridae	Teseptimavirus	178_0	Clustered	44	VC_178_0	44	0.6136	1.0	0.6136	9	1	1	1.0
JQ965703	Caudovirales	Autographiviridae	Teseptimavirus	178_0	Clustered	44	VC_178_0	44	0.6136	1.0	0.6136	9	1	1	1.0
JQ973847	Caudovirales	Siphoviridae	Phietavirus	138_0	Clustered	27	VC_138_0	27	0.4034	1.0	0.4034	1	1	1	0.9943
JX013863	Caudovirales	Siphoviridae	Phietavirus	138_0	Clustered	27	VC_138_0	27	0.4034	1.0	0.4034	1	1	1	0.9943
JX015524	Caudovirales	Siphoviridae	Fromanvirus	209_0	Clustered	6	VC_209_0	6	0.1478	1.0	0.1478	1	1	1	1.0
JX042579	Caudovirales	Siphoviridae	Timquatrovirus	214_0	Clustered	9	VC_214_0	9	0.8643	1.0	0.8643	1	1	1	1.0
JX045649	Norzivirales	Fiersviridae	Cunavirus	357_0	Clustered	4	VC_357_0	4	0.7388	0.99997607	0.7388	4	1	1	1.0
JX045650	Norzivirales	Fiersviridae	Hagavirus	357_0	Clustered	4	VC_357_0	4	0.7388	0.99997607	0.7388	4	1	1	1.0
JX080300	Caudovirales	Herelleviridae	Kayvirus	194_1	Clustered	25	VC_194_1	25	639	1.0	639	1	1	1	0.9967
JX080301	Caudovirales	Herelleviridae	Kayvirus	194_1	Clustered	25	VC_194_1	25	639	1.0	639	1	1	1	0.9967
JX080302	Caudovirales	Herelleviridae	Kayvirus	194_1	Clustered	25	VC_194_1	25	639	1.0	639	1	1	1	0.9967
JX080303	Caudovirales	Herelleviridae	Kayvirus	194_1	Clustered	25	VC_194_1	25	639	1.0	639	1	1	1	0.9967
JX080304	Caudovirales	Herelleviridae	Kayvirus	194_1	Clustered	25	VC_194_1	25	639	1.0	639	1	1	1	0.9967
JX080305	Caudovirales	Herelleviridae	Kayvirus	194_1	Clustered	25	VC_194_1	25	639	1.0	639	1	1	1	0.9967
JX094431	Caudovirales	Herelleviridae	Caeruleovirus	205_9	Clustered	4	VC_205_9	4	0.0782	0.99996515	0.0782	1	1	1	0.8333
JX094499	Caudovirales	Siphoviridae	Chivirus	324_0	Clustered	14	VC_324_0	14	0.7438	1.0	0.7438	1	1	1	1.0
JX094501	Caudovirales	Siphoviridae	Phietavirus	138_0	Clustered	27	VC_138_0	27	0.4034	1.0	0.4034	1	1	1	0.9943
JX100809	Caudovirales	Siphoviridae	Shapirovirus	328_3	Clustered	2	VC_328_3	2	0.1325	0.85557782	0.1133	1	1	1	1.0
JX100810	Caudovirales	Siphoviridae	Colossusvirus	328_1	Clustered	2	VC_328_1	2	0.1856	0.93376822	0.1733	1	1	1	1.0
JX100813	Caudovirales	Siphoviridae	Shapirovirus	328_3	Clustered	2	VC_328_3	2	0.1325	0.85557782	0.1133	1	1	1	1.0
JX100814	Caudovirales	Siphoviridae	Poindextervirus	328_2	Clustered	2	VC_328_2	2	0.1302	0.85557782	0.1114	1	1	1	1.0
JX120799	Caudovirales	Siphoviridae	Psavirus	147_0	Clustered	5	VC_147_0	5	0.6479	0.99999992	0.6479	3	1	1	1.0
JX121091	Caudovirales	Siphoviridae	Cheoctovirus	215_0	Clustered	25	VC_215_0	25	706	1.0	706	1	1	1	0.91
JX123262	Caudovirales	Myoviridae	Ceceduovirus	225_0	Clustered	2	VC_225_0	2	0.0454	0.95634781	0.0434	1	1	1	1.0
JX126918	Caudovirales	Herelleviridae	Pecentumvirus	287_0	Clustered	13	VC_287_0	13	0.6972	1.0	0.6972	1	1	1	1.0
JX126919	Caudovirales	Siphoviridae	Homburgvirus	186_0	Clustered	5	VC_186_0	5	0.9388	0.99999751	0.9388	1	1	1	1.0
JX126920	Caudovirales	Siphoviridae	Homburgvirus	186_0	Clustered	5	VC_186_0	5	0.9388	0.99999751	0.9388	1	1	1	1.0
JX128257	Caudovirales	Ackermannviridae	Kuttervirus	192_1	Clustered	35	VC_192_1	35	0.4572	1.0	0.4572	1	1	1	1.0
JX128258	Caudovirales	Myoviridae	Wifcevirus	171_0	Clustered	4	VC_171_0	4	0.1394	0.99998164	0.1394	1	1	1	1.0
JX128259	Caudovirales	Myoviridae	Tequatrovirus	223_2	Clustered/Singleton	1	VC_223_2	1	0.0	1.0	0.0	1	1	1	1.0
JX131330	Caudovirales	Siphoviridae	Yuavirus	277_0	Clustered	8	VC_277_0	8	0.6564	1.0	0.6564	2	1	1	1.0
JX145341	Caudovirales	Myoviridae	Colneyvirus	336_0	Clustered	5	VC_336_0	5	0.4237	0.99999966	0.4237	1	1	1	1.0
JX145342	Caudovirales	Myoviridae	Sherbrookevirus	337_0	Clustered	6	VC_337_0	6	0.7111	1.0	0.7111	1	1	1	1.0
JX173487	Caudovirales	Autographiviridae	Pifdecavirus	172_0	Clustered	19	VC_172_0	19	0.6376	1.0	0.6376	6	1	1	1.0
JX174275	Caudovirales	Siphoviridae	Triavirus	137_0	Clustered	23	VC_137_0	23	0.6591	1.0	0.6591	1	1	1	1.0
JX181824	Caudovirales	Myoviridae	Seunavirus	231_2	Clustered	2	VC_231_2	2	32	0.91283643	0.0292	1	1	1	1.0
JX181829	Caudovirales	Ackermannviridae	Agtrevirus	192_2	Clustered	7	VC_192_2	7	0.0588	0.98661488	58	2	1	1	1.0
JX182369	Caudovirales	Siphoviridae	Unassigned	401_0	Clustered	14	VC_401_0	14	0.9814	1.0	0.9814	4	1	1	1.0
JX182370	Caudovirales	Siphoviridae	Arequatrovirus	401_0	Clustered	14	VC_401_0	14	0.9814	1.0	0.9814	4	1	1	1.0
JX182372	Caudovirales	Siphoviridae	Tigunavirus	257_0	Clustered	5	VC_257_0	5	0.7566	0.99999906	0.7566	3	1	1	1.0
JX193904	Caudovirales	Siphoviridae	Efquatrovirus	261_0	Clustered	13	VC_261_0	13	0.9791	1.0	0.9791	1	1	1	1.0
JX194239	Caudovirales	Herelleviridae	Silviavirus	194_3	Clustered	4	VC_194_3	4	0.0672	0.99998269	0.0672	1	1	1	1.0
JX195166	Caudovirales	Demerecviridae	Myunavirus	298_1	Clustered	2	VC_298_1	2	0.0145	0.95639778	0.0139	2	1	1	1.0
JX202565	Caudovirales	Siphoviridae	Jerseyvirus	333_0	Clustered	18	VC_333_0	18	0.8639	1.0	0.8639	3	1	1	1.0
JX238501	Caudovirales	Herelleviridae	Agatevirus	205_11	Clustered/Singleton	1	VC_205_11	1	0.0	1.0	0.0	1	1	1	1.0
JX262215	Caudovirales	Siphoviridae	Pahexavirus	350_0	Clustered	57	VC_350_0	57	1.0	1.0	1.0	1	1	1	1.0
JX262216	Caudovirales	Siphoviridae	Pahexavirus	350_0	Clustered	57	VC_350_0	57	1.0	1.0	1.0	1	1	1	1.0
JX262217	Caudovirales	Siphoviridae	Pahexavirus	350_0	Clustered	57	VC_350_0	57	1.0	1.0	1.0	1	1	1	1.0
JX262218	Caudovirales	Siphoviridae	Pahexavirus	350_0	Clustered	57	VC_350_0	57	1.0	1.0	1.0	1	1	1	1.0
JX262219	Caudovirales	Siphoviridae	Pahexavirus	350_0	Clustered	57	VC_350_0	57	1.0	1.0	1.0	1	1	1	1.0
JX262220	Caudovirales	Siphoviridae	Pahexavirus	350_0	Clustered	57	VC_350_0	57	1.0	1.0	1.0	1	1	1	1.0
JX262221	Caudovirales	Siphoviridae	Pahexavirus	350_0	Clustered	57	VC_350_0	57	1.0	1.0	1.0	1	1	1	1.0
JX262222	Caudovirales	Siphoviridae	Pahexavirus	350_0	Clustered	57	VC_350_0	57	1.0	1.0	1.0	1	1	1	1.0
JX262223	Caudovirales	Siphoviridae	Pahexavirus	350_0	Clustered	57	VC_350_0	57	1.0	1.0	1.0	1	1	1	1.0
JX262224	Caudovirales	Siphoviridae	Pahexavirus	350_0	Clustered	57	VC_350_0	57	1.0	1.0	1.0	1	1	1	1.0
JX262225	Caudovirales	Siphoviridae	Pahexavirus	350_0	Clustered	57	VC_350_0	57	1.0	1.0	1.0	1	1	1	1.0
JX262376	Caudovirales	Siphoviridae	Arequatrovirus	401_0	Clustered	14	VC_401_0	14	0.9814	1.0	0.9814	4	1	1	1.0
JX274646	Caudovirales	Siphoviridae	Dubowvirus	138_1	Clustered	19	VC_138_1	19	0.3014	1.0	0.3014	2	1	1	0.9766
JX290549	Caudovirales	Autographiviridae	Phimunavirus	189_0	Clustered	17	VC_189_0	17	0.7922	1.0	0.7922	4	1	1	1.0
JX297445	Caudovirales	Siphoviridae	Jerseyvirus	333_0	Clustered	18	VC_333_0	18	0.8639	1.0	0.8639	3	1	1	1.0
JX306041	Caudovirales	Myoviridae	Tulanevirus	229_1	Clustered/Singleton	1	VC_229_1	1	0.0	1.0	0.0	1	1	1	1.0
JX307702	Caudovirales	Siphoviridae	Fromanvirus	209_1	Clustered	14	VC_209_1	14	0.2933	1.0	0.2933	1	1	1	989
JX307704	Caudovirales	Siphoviridae	Fromanvirus	209_1	Clustered	14	VC_209_1	14	0.2933	1.0	0.2933	1	1	1	989
JX307705	Caudovirales	Siphoviridae	Fromanvirus	208_0	Clustered	25	VC_208_0	25	0.9329	1.0	0.9329	1	1	1	1.0
JX316028	Caudovirales	Myoviridae	Erskinevirus	246_0	Clustered	5	VC_246_0	5	0.5096	0.99999981	0.5096	4	1	1	1.0
JX403940	Caudovirales	Siphoviridae	Vieuvirus	118_0	Clustered	2	VC_118_0	2	0.9719	0.72985431	0.7093	1	1	1	1.0
JX411619	Caudovirales	Siphoviridae	Fromanvirus	209_1	Clustered	14	VC_209_1	14	0.2933	1.0	0.2933	1	1	1	989
JX411620	Caudovirales	Siphoviridae	Cheoctovirus	215_0	Clustered	25	VC_215_0	25	706	1.0	706	1	1	1	0.91
JX412914	Tubulavirales	Inoviridae	Inovirus	152_0	Clustered	12	VC_152_0	12	0.8841	1.0	0.8841	1	1	1	1.0
JX415535	Caudovirales	Schitoviridae	Gamaleyavirus	361_1	Clustered	26	VC_361_1	26	606	1.0	606	14	1	1	0.7323
JX415536	Caudovirales	Podoviridae	Kuravirus	284_0	Clustered	6	VC_284_0	6	0.7396	1.0	0.7396	1	1	1	1.0
JX421753	Caudovirales	Autographiviridae	Teetrevirus	178_0	Clustered	44	VC_178_0	44	0.6136	1.0	0.6136	9	1	1	1.0
JX442241	Caudovirales	Siphoviridae	Homburgvirus	186_0	Clustered	5	VC_186_0	5	0.9388	0.99999751	0.9388	1	1	1	1.0
JX483873	Caudovirales	Autographiviridae	Paadamvirus	176_0	Clustered	13	VC_176_0	13	0.5639	1.0	0.5639	11	1	1	1.0
JX483874	Caudovirales	Autographiviridae	Cuernavacavirus	161_0	Clustered	3	VC_161_0	3	421	0.99829249	0.4202	1	1	1	1.0
JX483879	Caudovirales	Autographiviridae	Cuernavacavirus	161_0	Clustered	3	VC_161_0	3	421	0.99829249	0.4202	1	1	1	1.0
JX483880	Caudovirales	Autographiviridae	Cuernavacavirus	161_0	Clustered	3	VC_161_0	3	421	0.99829249	0.4202	1	1	1	1.0
JX486087	Caudovirales	Siphoviridae	Coetzeevirus	292_0	Clustered	3	VC_292_0	3	0.9198	0.99054823	0.9111	1	1	1	1.0
JX486088	Caudovirales	Siphoviridae	Douglaswolinvirus	332_1	Clustered	4	VC_332_1	4	0.3846	0.9999667	0.3846	2	1	1	1.0
JX495043	Caudovirales	Siphoviridae	Beetrevirus	58_0	Clustered	3	VC_58_0	3	0.2694	0.9980995	0.2689	1	1	1	1.0
JX501340	Caudovirales	Autographiviridae	Phikmvvirus	198_0	Clustered	16	VC_198_0	16	0.8348	1.0	0.8348	1	1	1	1.0
JX556418	Caudovirales	Siphoviridae	Mardecavirus	281_0	Clustered	2	VC_281_0	2	0.9021	0.93003234	839	1	1	1	1.0
JX560968	Caudovirales	Myoviridae	Felixounavirus	241_0	Clustered	23	VC_241_0	23	0.9281	1.0	0.9281	3	1	1	1.0
JX561091	Caudovirales	Myoviridae	Phapecoctavirus	355_0	Clustered	5	VC_355_0	5	0.4501	0.99999994	0.4501	1	1	1	1.0
JX564242	Caudovirales	Siphoviridae	Vedamuthuvirus	249_0	Clustered	5	VC_249_0	5	0.9401	0.99990866	0.94	1	1	1	1.0
JX567312	Caudovirales	Siphoviridae	Vedamuthuvirus	249_0	Clustered	5	VC_249_0	5	0.9401	0.99990866	0.94	1	1	1	1.0
JX569801	Caudovirales	Myoviridae	Fletchervirus	382_0	Clustered	5	VC_382_0	5	0.8706	0.99999024	0.8706	1	1	1	1.0
JX570702	Caudovirales	Siphoviridae	Pahexavirus	350_0	Clustered	57	VC_350_0	57	1.0	1.0	1.0	1	1	1	1.0
JX570705	Caudovirales	Siphoviridae	Pahexavirus	350_0	Clustered	57	VC_350_0	57	1.0	1.0	1.0	1	1	1	1.0
JX570706	Caudovirales	Siphoviridae	Pahexavirus	350_0	Clustered	57	VC_350_0	57	1.0	1.0	1.0	1	1	1	1.0
JX570710	Caudovirales	Siphoviridae	Pahexavirus	350_0	Clustered	57	VC_350_0	57	1.0	1.0	1.0	1	1	1	1.0
JX570712	Caudovirales	Siphoviridae	Pahexavirus	350_0	Clustered	57	VC_350_0	57	1.0	1.0	1.0	1	1	1	1.0
JX570713	Caudovirales	Siphoviridae	Pahexavirus	350_0	Clustered	57	VC_350_0	57	1.0	1.0	1.0	1	1	1	1.0
JX570714	Caudovirales	Siphoviridae	Pahexavirus	350_0	Clustered	57	VC_350_0	57	1.0	1.0	1.0	1	1	1	1.0
JX625144	Norzivirales	Fiersviridae	Empivirus	357_0	Clustered	4	VC_357_0	4	0.7388	0.99997607	0.7388	4	1	1	1.0
JX658790	Caudovirales	Autographiviridae	Friunavirus	390_0	Clustered	23	VC_390_0	23	1.0	1.0	1.0	3	1	1	1.0
JX846612	Caudovirales	Herelleviridae	Silviavirus	194_3	Clustered	4	VC_194_3	4	0.0672	0.99998269	0.0672	1	1	1	1.0
JX846613	Caudovirales	Herelleviridae	Silviavirus	194_3	Clustered	4	VC_194_3	4	0.0672	0.99998269	0.0672	1	1	1	1.0
JX863101	Caudovirales	Podoviridae	Vicosavirus	283_0	Clustered	11	VC_283_0	11	875	1.0	875	4	1	1	1.0
JX865427	Caudovirales	Siphoviridae	Dhillonvirus	71_0	Clustered	7	VC_71_0	7	0.5529	1.0	0.5529	1	1	1	1.0
JX866719	Caudovirales	Myoviridae	Jedunavirus	190_0	Clustered	6	VC_190_0	6	0.8262	0.99999995	0.8262	3	1	1	1.0
JX867715	Caudovirales	Podoviridae	Kuravirus	284_0	Clustered	6	VC_284_0	6	0.7396	1.0	0.7396	1	1	1	1.0
JX872508	Caudovirales	Autographiviridae	Teseptimavirus	178_0	Clustered	44	VC_178_0	44	0.6136	1.0	0.6136	9	1	1	1.0
JX875065	Caudovirales	Herelleviridae	Kayvirus	194_1	Clustered	25	VC_194_1	25	639	1.0	639	1	1	1	0.9967
JX878496	Caudovirales	Ackermannviridae	Miltonvirus	192_3	Clustered	2	VC_192_3	2	0.0108	0.95567354	0.0103	1	1	1	1.0
JX878671	Caudovirales	Herelleviridae	Kayvirus	194_1	Clustered	25	VC_194_1	25	639	1.0	639	1	1	1	0.9967
JX880034	Caudovirales	Schitoviridae	Gamaleyavirus	361_1	Clustered	26	VC_361_1	26	606	1.0	606	14	1	1	0.7323
JX887877	Caudovirales	Siphoviridae	Lwoffvirus	379_0	Clustered	2	VC_379_0	2	0.9565	0.85557782	0.8183	1	1	1	1.0
JX889246	Caudovirales	Siphoviridae	Camvirus	401_0	Clustered	14	VC_401_0	14	0.9814	1.0	0.9814	4	1	1	1.0
JX901189	Caudovirales	Siphoviridae	Mapvirus	216_0	Clustered	2	VC_216_0	2	0.2949	0.94864642	0.2798	1	1	1	1.0
JX912252	Caudovirales	Drexlerviridae	Tunavirus	274_0	Clustered	18	VC_274_0	18	0.4852	1.0	0.4852	3	1	1	1.0
JX976549	Caudovirales	Myoviridae	Obolenskvirus	130_0	Clustered	8	VC_130_0	8	0.8972	1.0	0.8972	1	1	1	1.0
JX997978	Caudovirales	Autographiviridae	Phikmvvirus	198_0	Clustered	16	VC_198_0	16	0.8348	1.0	0.8348	1	1	1	1.0
KC012913	Caudovirales	Herelleviridae	Kayvirus	194_1	Clustered	25	VC_194_1	25	639	1.0	639	1	1	1	0.9967
KC013021	Caudovirales	Siphoviridae	Limdunavirus	385_0	Clustered	7	VC_385_0	7	0.6714	1.0	0.6714	1	1	1	1.0
KC013022	Caudovirales	Siphoviridae	Limdunavirus	385_0	Clustered	7	VC_385_0	7	0.6714	1.0	0.6714	1	1	1	1.0
KC013023	Caudovirales	Siphoviridae	Limdunavirus	385_0	Clustered	7	VC_385_0	7	0.6714	1.0	0.6714	1	1	1	1.0
KC013025	Caudovirales	Siphoviridae	Limdunavirus	385_0	Clustered	7	VC_385_0	7	0.6714	1.0	0.6714	1	1	1	1.0
KC013026	Caudovirales	Siphoviridae	Unaquatrovirus	386_0	Clustered	5	VC_386_0	5	471	0.99999906	471	1	1	1	1.0
KC013027	Caudovirales	Siphoviridae	Unaquatrovirus	386_0	Clustered	5	VC_386_0	5	471	0.99999906	471	1	1	1	1.0
KC107834	Caudovirales	Autographiviridae	Cronosvirus	160_0	Clustered	14	VC_160_0	14	0.6396	1.0	0.6396	8	1	1	1.0
KC139512	Caudovirales	Siphoviridae	Chivirus	324_0	Clustered	14	VC_324_0	14	0.7438	1.0	0.7438	1	1	1	1.0
KC139518	Caudovirales	Siphoviridae	Cornellvirus	333_0	Clustered	18	VC_333_0	18	0.8639	1.0	0.8639	3	1	1	1.0
KC139519	Caudovirales	Siphoviridae	Chivirus	324_0	Clustered	14	VC_324_0	14	0.7438	1.0	0.7438	1	1	1	1.0
KC139521	Caudovirales	Myoviridae	Stockinghallvirus	29_0	Clustered	32	VC_29_0	32	0.5208	1.0	0.5208	6	2	2	1.0
KC139649	Caudovirales	Siphoviridae	Nonanavirus	402_0	Clustered	4	VC_402_0	4	0.9207	0.99982029	0.9205	3	1	1	1.0
KC171646	Caudovirales	Siphoviridae	Junavirus	220_0	Clustered	9	VC_220_0	9	0.5302	1.0	0.5302	7	1	1	0.9444
KC171647	Caudovirales	Siphoviridae	Junavirus	220_0	Clustered	9	VC_220_0	9	0.5302	1.0	0.5302	7	1	1	0.9444
KC182542	Caudovirales	Siphoviridae	Skunavirus	206_0	Clustered	95	VC_206_0	95	0.9999	1.0	0.9999	2	1	1	1.0
KC182544	Caudovirales	Siphoviridae	Skunavirus	206_0	Clustered	95	VC_206_0	95	0.9999	1.0	0.9999	2	1	1	1.0
KC182545	Caudovirales	Siphoviridae	Skunavirus	206_0	Clustered	95	VC_206_0	95	0.9999	1.0	0.9999	2	1	1	1.0
KC182546	Caudovirales	Siphoviridae	Skunavirus	206_0	Clustered	95	VC_206_0	95	0.9999	1.0	0.9999	2	1	1	1.0
KC182547	Caudovirales	Siphoviridae	Skunavirus	206_0	Clustered	95	VC_206_0	95	0.9999	1.0	0.9999	2	1	1	1.0
KC182549	Caudovirales	Siphoviridae	Skunavirus	206_0	Clustered	95	VC_206_0	95	0.9999	1.0	0.9999	2	1	1	1.0
KC182550	Caudovirales	Siphoviridae	Skunavirus	206_0	Clustered	95	VC_206_0	95	0.9999	1.0	0.9999	2	1	1	1.0
KC182551	Caudovirales	Siphoviridae	Skunavirus	206_0	Clustered	95	VC_206_0	95	0.9999	1.0	0.9999	2	1	1	1.0
KC182552	Caudovirales	Siphoviridae	Skunavirus	206_0	Clustered	95	VC_206_0	95	0.9999	1.0	0.9999	2	1	1	1.0
KC206276	Caudovirales	Schitoviridae	Gamaleyavirus	361_1	Clustered	26	VC_361_1	26	606	1.0	606	14	1	1	0.7323
KC262634	Caudovirales	Podoviridae	Hollowayvirus	331_0	Clustered	2	VC_331_0	2	0.9577	0.72985431	699	1	1	1	1.0
KC292020	Caudovirales	Myoviridae	Haloferacalesvirus	236_0	Clustered	4	VC_236_0	4	0.8116	0.99554435	808	1	1	1	1.0
KC292022	Caudovirales	Myoviridae	Haloferacalesvirus	236_0	Clustered	4	VC_236_0	4	0.8116	0.99554435	808	1	1	1	1.0
KC294142	Caudovirales	Podoviridae	Bruynoghevirus	283_0	Clustered	11	VC_283_0	11	875	1.0	875	4	1	1	1.0
KC295538	Caudovirales	Myoviridae	Asteriusvirus	202_4	Clustered	2	VC_202_4	2	0.0951	0.90825255	0.0864	1	1	1	1.0
KC310805	Caudovirales	Autographiviridae	Aegirvirus	235_0	Clustered	22	VC_235_0	22	825	1.0	825	19	1	1	1.0
KC310806	Caudovirales	Autographiviridae	Kembevirus	235_0	Clustered	22	VC_235_0	22	825	1.0	825	19	1	1	1.0
KC311669	Caudovirales	Autographiviridae	Friunavirus	390_0	Clustered	23	VC_390_0	23	1.0	1.0	1.0	3	1	1	1.0
KC330679	Caudovirales	Siphoviridae	Andromedavirus	403_0	Clustered	8	VC_403_0	8	1.0	1.0	1.0	1	1	1	1.0
KC330680	Caudovirales	Siphoviridae	Andromedavirus	403_0	Clustered	8	VC_403_0	8	1.0	1.0	1.0	1	1	1	1.0
KC330682	Caudovirales	Siphoviridae	Andromedavirus	403_0	Clustered	8	VC_403_0	8	1.0	1.0	1.0	1	1	1	1.0
KC330683	Caudovirales	Siphoviridae	Andromedavirus	403_0	Clustered	8	VC_403_0	8	1.0	1.0	1.0	1	1	1	1.0
KC330684	Caudovirales	Siphoviridae	Andromedavirus	403_0	Clustered	8	VC_403_0	8	1.0	1.0	1.0	1	1	1	1.0
KC333879	Caudovirales	Drexlerviridae	Rogunavirus	275_0	Clustered	18	VC_275_0	18	0.5723	1.0	0.5723	9	1	1	1.0
KC342645	Caudovirales	Siphoviridae	Peeveelvirus	136_0	Clustered	24	VC_136_0	24	0.4703	1.0	0.4703	2	1	1	0.7717
KC357596	Tubulavirales	Inoviridae	Saetivirus	135_0	Clustered	2	VC_135_0	2	1.0	1.0	1.0	1	1	1	1.0
KC438283	Caudovirales	Schitoviridae	Pacinivirus	365_0	Clustered	2	VC_365_0	2	0.0654	0.95553563	0.0625	1	1	1	1.0
KC465900	Caudovirales	Autographiviridae	Stopavirus	176_0	Clustered	13	VC_176_0	13	0.5639	1.0	0.5639	11	1	1	1.0
KC465901	Caudovirales	Autographiviridae	Pelagivirus	176_0	Clustered	13	VC_176_0	13	0.5639	1.0	0.5639	11	1	1	1.0
KC522412	Caudovirales	Siphoviridae	Skunavirus	206_0	Clustered	95	VC_206_0	95	0.9999	1.0	0.9999	2	1	1	1.0
KC576783	Caudovirales	Siphoviridae	Buttersvirus	304_0	Clustered	9	VC_304_0	9	0.4789	1.0	0.4789	3	1	1	1.0
KC579452	Caudovirales	Drexlerviridae	Rogunavirus	275_0	Clustered	18	VC_275_0	18	0.5723	1.0	0.5723	9	1	1	1.0
KC595278	Caudovirales	Siphoviridae	Biseptimavirus	136_0	Clustered	24	VC_136_0	24	0.4703	1.0	0.4703	2	1	1	0.7717
KC595279	Caudovirales	Siphoviridae	Phietavirus	138_0	Clustered	27	VC_138_0	27	0.4034	1.0	0.4034	1	1	1	0.9943
KC595514	Caudovirales	Myoviridae	Jimmervirus	338_0	Clustered	4	VC_338_0	4	0.9003	0.99985574	0.9001	2	1	1	1.0
KC595517	Caudovirales	Myoviridae	Abouovirus	338_0	Clustered	4	VC_338_0	4	0.9003	0.99985574	0.9001	2	1	1	1.0
KC595518	Caudovirales	Myoviridae	Abouovirus	338_0	Clustered	4	VC_338_0	4	0.9003	0.99985574	0.9001	2	1	1	1.0
KC618326	Caudovirales	Myoviridae	Peduovirus	29_0	Clustered	32	VC_29_0	32	0.5208	1.0	0.5208	6	2	2	1.0
KC677662	Caudovirales	Siphoviridae	Chivirus	324_0	Clustered	14	VC_324_0	14	0.7438	1.0	0.7438	1	1	1	1.0
KC685370	Caudovirales	Salasmaviridae	Klosterneuburgvirus	343_0	Clustered	12	VC_343_0	12	0.7581	1.0	0.7581	3	1	1	1.0
KC691256	Caudovirales	Siphoviridae	Fishburnevirus	301_0	Clustered	7	VC_301_0	7	0.4656	1.0	0.4656	3	1	1	1.0
KC699836	Caudovirales	Herelleviridae	Siophivirus	205_15	Clustered/Singleton	1	VC_205_15	1	0.0	1.0	0.0	1	1	1	1.0
KC700556	Caudovirales	Siphoviridae	Likavirus	401_0	Clustered	14	VC_401_0	14	0.9814	1.0	0.9814	4	1	1	1.0
KC700557	Caudovirales	Siphoviridae	Likavirus	401_0	Clustered	14	VC_401_0	14	0.9814	1.0	0.9814	4	1	1	1.0
KC700558	Caudovirales	Siphoviridae	Likavirus	401_0	Clustered	14	VC_401_0	14	0.9814	1.0	0.9814	4	1	1	1.0
KC710998	Caudovirales	Drexlerviridae	Hanrivervirus	276_0	Clustered	39	VC_276_0	39	0.7136	1.0	0.7136	9	1	1	807
KC751414	Caudovirales	Zobellviridae	Melvirus	233_0	Clustered	5	VC_233_0	5	0.4871	0.99997176	0.4871	5	1	1	1.0
KC758116	Caudovirales	Siphoviridae	Yuavirus	277_0	Clustered	8	VC_277_0	8	0.6564	1.0	0.6564	2	1	1	1.0
KC801932	Caudovirales	Myoviridae	Pseudotevenvirus	291_1	Clustered	9	VC_291_1	9	0.2921	1.0	0.2921	1	1	1	1.0
KC821609	Caudovirales	Podoviridae	Lightbulbvirus	405_0	Clustered	2	VC_405_0	2	1.0	1.0	1.0	1	1	1	1.0
KC821613	Caudovirales	Siphoviridae	Helsingorvirus	406_0	Clustered	3	VC_406_0	3	0.9012	0.98935412	0.8916	1	1	1	1.0
KC821617	Caudovirales	Siphoviridae	Helsingorvirus	406_0	Clustered	3	VC_406_0	3	0.9012	0.98935412	0.8916	1	1	1	1.0
KC821619	Caudovirales	Siphoviridae	Helsingorvirus	406_0	Clustered	3	VC_406_0	3	0.9012	0.98935412	0.8916	1	1	1	1.0
KC821632	Caudovirales	Podoviridae	Lightbulbvirus	405_0	Clustered	2	VC_405_0	2	1.0	1.0	1.0	1	1	1	1.0
KC853746	Caudovirales	Autographiviridae	Mguuvirus	159_0	Clustered	20	VC_159_0	20	0.4495	1.0	0.4495	15	1	1	1.0
KC862297	Caudovirales	Myoviridae	Pakpunavirus	164_0	Clustered	11	VC_164_0	11	0.6553	1.0	0.6553	1	1	1	1.0
KC862298	Caudovirales	Myoviridae	Pakpunavirus	164_0	Clustered	11	VC_164_0	11	0.6553	1.0	0.6553	1	1	1	1.0
KC862300	Caudovirales	Myoviridae	Pakpunavirus	164_0	Clustered	11	VC_164_0	11	0.6553	1.0	0.6553	1	1	1	1.0
KC959568	Caudovirales	Siphoviridae	Unahavirus	408_0	Clustered	5	VC_408_0	5	1.0	1.0	1.0	2	1	1	1.0
KC960671	Caudovirales	Autographiviridae	Teetrevirus	178_0	Clustered	44	VC_178_0	44	0.6136	1.0	0.6136	9	1	1	1.0
KF010834	Caudovirales	Siphoviridae	Fernvirus	59_0	Clustered	18	VC_59_0	18	0.8255	1.0	0.8255	1	1	1	1.0
KF021268	Caudovirales	Herelleviridae	Sepunavirus	194_2	Clustered	2	VC_194_2	2	0.0203	0.95453717	0.0194	1	1	1	1.0
KF024722	Caudovirales	Siphoviridae	Rosebushvirus	255_2	Clustered	4	VC_255_2	4	123	0.9999796	123	2	1	1	1.0
KF024727	Caudovirales	Siphoviridae	Acadianvirus	255_1	Clustered	13	VC_255_1	13	0.4839	1.0	0.4839	2	1	1	1.0
KF024728	Caudovirales	Siphoviridae	Mapvirus	216_0	Clustered	2	VC_216_0	2	0.2949	0.94864642	0.2798	1	1	1	1.0
KF055347	Caudovirales	Myoviridae	Felixounavirus	241_0	Clustered	23	VC_241_0	23	0.9281	1.0	0.9281	3	1	1	1.0
KF147927	Caudovirales	Siphoviridae	Sozzivirus	387_0	Clustered	3	VC_387_0	3	0.8304	0.99563723	0.8268	1	1	1	1.0
KF148055	Caudovirales	Siphoviridae	Jerseyvirus	333_0	Clustered	18	VC_333_0	18	0.8639	1.0	0.8639	3	1	1	1.0
KF156340	Caudovirales	Myoviridae	Acionnavirus	269_17	Clustered	8	VC_269_17	8	0.1336	1.0	0.1336	4	1	1	0.75
KF183314	Caudovirales	Siphoviridae	Sozzivirus	387_0	Clustered	3	VC_387_0	3	0.8304	0.99563723	0.8268	1	1	1	1.0
KF183315	Caudovirales	Siphoviridae	Sozzivirus	387_0	Clustered	3	VC_387_0	3	0.8304	0.99563723	0.8268	1	1	1	1.0
KF188410	Caudovirales	Siphoviridae	Cequinquevirus	334_0	Clustered	6	VC_334_0	6	1.0	1.0	1.0	1	1	1	1.0
KF188458	Kalamavirales	Tectiviridae	Betatectivirus	320_0	Clustered	4	VC_320_0	4	1.0	1.0	1.0	1	1	1	1.0
KF192053	Caudovirales	Siphoviridae	Saphexavirus	185_0	Clustered	5	VC_185_0	5	0.8939	0.99999728	0.8939	1	1	1	1.0
KF192075	Caudovirales	Schitoviridae	Gamaleyavirus	361_1	Clustered	26	VC_361_1	26	606	1.0	606	14	1	1	0.7323
KF208315	Caudovirales	Myoviridae	Tequatrovirus	223_1	Clustered	2	VC_223_1	2	0.0061	0.83550618	0.0051	1	1	1	1.0
KF208639	Caudovirales	Herelleviridae	Bequatrovirus	205_5	Clustered	4	VC_205_5	4	0.0753	0.99994012	0.0753	1	1	1	1.0
KF279411	Caudovirales	Siphoviridae	Coopervirus	255_1	Clustered	13	VC_255_1	13	0.4839	1.0	0.4839	2	1	1	1.0
KF279412	Caudovirales	Siphoviridae	Coopervirus	255_1	Clustered	13	VC_255_1	13	0.4839	1.0	0.4839	2	1	1	1.0
KF322026	Caudovirales	Autographiviridae	Kaohsiungvirus	273_0	Clustered	36	VC_273_0	36	1.0	1.0	1.0	12	1	1	1.0
KF322032	Caudovirales	Myoviridae	Peduovirus	29_0	Clustered	32	VC_29_0	32	0.5208	1.0	0.5208	6	2	2	1.0
KF356199	Caudovirales	Myoviridae	Fukuivirus	149_0	Clustered	2	VC_149_0	2	1.0	1.0	1.0	1	1	1	1.0
KF381361	Caudovirales	Myoviridae	Emdodecavirus	271_0	Clustered	3	VC_271_0	3	0.1987	0.99840751	0.1984	1	1	1	1.0
KF493879	Caudovirales	Siphoviridae	Pipefishvirus	255_0	Clustered	4	VC_255_0	4	0.1688	0.9999794	0.1688	1	1	1	1.0
KF493881	Caudovirales	Siphoviridae	Coopervirus	255_1	Clustered	13	VC_255_1	13	0.4839	1.0	0.4839	2	1	1	1.0
KF534715	Caudovirales	Chaseviridae	Suwonvirus	368_0	Clustered	11	VC_368_0	11	0.8553	1.0	0.8553	6	1	1	1.0
KF550303	Caudovirales	Myoviridae	Seunavirus	231_3	Clustered	2	VC_231_3	2	0.0331	0.90758062	0.03	1	1	1	1.0
KF562340	Caudovirales	Schitoviridae	Gamaleyavirus	361_1	Clustered	26	VC_361_1	26	606	1.0	606	14	1	1	0.7323
KF562864	Caudovirales	Siphoviridae	Jerseyvirus	333_0	Clustered	18	VC_333_0	18	0.8639	1.0	0.8639	3	1	1	1.0
KF562865	Caudovirales	Siphoviridae	Jerseyvirus	333_0	Clustered	18	VC_333_0	18	0.8639	1.0	0.8639	3	1	1	1.0
KF591601	Caudovirales	Siphoviridae	Murrayvirus	95_0	Clustered	6	VC_95_0	6	819	1.0	819	4	2	1	1.0
KF598856	Caudovirales	Siphoviridae	Triavirus	137_0	Clustered	23	VC_137_0	23	0.6591	1.0	0.6591	1	1	1	1.0
KF598865	Caudovirales	Podoviridae	Wumptrevirus	359_0	Clustered	2	VC_359_0	2	0.5597	0.86822376	0.4859	1	1	1	1.0
KF620435	Caudovirales	Schitoviridae	Gamaleyavirus	361_1	Clustered	26	VC_361_1	26	606	1.0	606	14	1	1	0.7323
KF669647	Caudovirales	Herelleviridae	Bequatrovirus	205_5	Clustered	4	VC_205_5	4	0.0753	0.99994012	0.0753	1	1	1	1.0
KF669648	Caudovirales	Siphoviridae	Andromedavirus	403_0	Clustered	8	VC_403_0	8	1.0	1.0	1.0	1	1	1	1.0
KF669649	Caudovirales	Herelleviridae	Okubovirus	289_0	Clustered	2	VC_289_0	2	0.2449	0.95541888	234	1	1	1	1.0
KF669650	Caudovirales	Siphoviridae	Cinunavirus	383_0	Clustered	3	VC_383_0	3	0.5877	0.98867275	0.5811	3	1	1	1.0
KF669651	Caudovirales	Siphoviridae	Andromedavirus	403_0	Clustered	8	VC_403_0	8	1.0	1.0	1.0	1	1	1	1.0
KF669652	Caudovirales	Herelleviridae	Nitunavirus	205_2	Clustered	2	VC_205_2	2	0.0303	0.95073082	0.0288	1	1	1	1.0
KF669653	Caudovirales	Ackermannviridae	Kuttervirus	192_1	Clustered	35	VC_192_1	35	0.4572	1.0	0.4572	1	1	1	1.0
KF669654	Caudovirales	Ackermannviridae	Kuttervirus	192_1	Clustered	35	VC_192_1	35	0.4572	1.0	0.4572	1	1	1	1.0
KF669655	Caudovirales	Podoviridae	Pagevirus	141_0	Clustered	5	VC_141_0	5	0.8933	0.99999985	0.8933	1	1	1	1.0
KF669656	Caudovirales	Autographiviridae	Pettyvirus	390_0	Clustered	23	VC_390_0	23	1.0	1.0	1.0	3	1	1	1.0
KF669659	Caudovirales	Siphoviridae	Andromedavirus	403_0	Clustered	8	VC_403_0	8	1.0	1.0	1.0	1	1	1	1.0
KF669660	Caudovirales	Podoviridae	Pagevirus	141_0	Clustered	5	VC_141_0	5	0.8933	0.99999985	0.8933	1	1	1	1.0
KF669661	Caudovirales	Siphoviridae	Slashvirus	409_0	Clustered	4	VC_409_0	4	0.9983	0.96662349	965	1	1	1	1.0
KF669662	Caudovirales	Herelleviridae	Bequatrovirus	205_7	Clustered/Singleton	1	VC_205_7	1	0.0	1.0	0.0	1	1	1	1.0
KF669663	Caudovirales	Siphoviridae	Slashvirus	409_0	Clustered	4	VC_409_0	4	0.9983	0.96662349	965	1	1	1	1.0
KF728385	Caudovirales	Siphoviridae	Efquatrovirus	261_0	Clustered	13	VC_261_0	13	0.9791	1.0	0.9791	1	1	1	1.0
KF733017	Caudovirales	Siphoviridae	Efquatrovirus	261_0	Clustered	13	VC_261_0	13	0.9791	1.0	0.9791	1	1	1	1.0
KF765493	Caudovirales	Autographiviridae	Drulisvirus	188_0	Clustered	21	VC_188_0	21	0.7518	1.0	0.7518	3	1	1	1.0
KF766114	Caudovirales	Herelleviridae	Kayvirus	194_1	Clustered	25	VC_194_1	25	639	1.0	639	1	1	1	0.9967
KF766125	Caudovirales	Podoviridae	Diegovirus	108_0	Clustered	21	VC_108_0	21	0.7299	1.0	0.7299	3	1	1	0.8667
KF771237	Caudovirales	Drexlerviridae	Rogunavirus	275_0	Clustered	18	VC_275_0	18	0.5723	1.0	0.5723	9	1	1	1.0
KF771239	Caudovirales	Drexlerviridae	Rogunavirus	275_0	Clustered	18	VC_275_0	18	0.5723	1.0	0.5723	9	1	1	1.0
KF787095	Caudovirales	Schitoviridae	Jwalphavirus	361_1	Clustered	26	VC_361_1	26	606	1.0	606	14	1	1	0.7323
KF800937	Caudovirales	Autographiviridae	Kaohsiungvirus	273_0	Clustered	36	VC_273_0	36	1.0	1.0	1.0	12	1	1	1.0
KF806588	Caudovirales	Schitoviridae	Johnsonvirus	361_1	Clustered	26	VC_361_1	26	606	1.0	606	14	1	1	0.7323
KF806589	Caudovirales	Myoviridae	Agricanvirus	248_0	Clustered	6	VC_248_0	6	0.4646	1.0	0.4646	1	1	1	1.0
KF811200	Caudovirales	Siphoviridae	Lokivirus	278_0	Clustered	7	VC_278_0	7	0.5424	1.0	0.5424	4	1	1	1.0
KF831354	Caudovirales	Siphoviridae	Biseptimavirus	136_0	Clustered	24	VC_136_0	24	0.4703	1.0	0.4703	2	1	1	0.7717
KF841477	Caudovirales	Siphoviridae	Fishburnevirus	301_0	Clustered	7	VC_301_0	7	0.4656	1.0	0.4656	3	1	1	1.0
KF856712	Caudovirales	Podoviridae	Bruynoghevirus	283_0	Clustered	11	VC_283_0	11	875	1.0	875	4	1	1	1.0
KF925357	Caudovirales	Myoviridae	Tequatrovirus	223_13	Clustered	3	VC_223_13	3	12	0.95633777	0.0115	1	1	1	0.6667
KF926093	Caudovirales	Siphoviridae	Audreyjarvisvirus	207_0	Clustered	7	VC_207_0	7	0.9991	0.99993057	0.9991	1	1	1	1.0
KF929199	Caudovirales	Siphoviridae	Sextaecvirus	156_0	Clustered	2	VC_156_0	2	0.4116	0.95393721	0.3927	1	1	1	1.0
KF971864	Caudovirales	Podoviridae	Oslovirus	108_0	Clustered	21	VC_108_0	21	0.7299	1.0	0.7299	3	1	1	0.8667
KF977490	Caudovirales	Siphoviridae	Rigallicvirus	72_0	Clustered	2	VC_72_0	2	0.1107	0.94172064	0.1042	2	2	1	1.0
KF981730	Caudovirales	Podoviridae	Kuravirus	284_0	Clustered	6	VC_284_0	6	0.7396	1.0	0.7396	1	1	1	1.0
KF986246	Caudovirales	Siphoviridae	Buttersvirus	304_0	Clustered	9	VC_304_0	9	0.4789	1.0	0.4789	3	1	1	1.0
KJ002054	Caudovirales	Chaseviridae	Yushanvirus	369_0	Clustered	3	VC_369_0	3	0.2352	0.9974978	0.2346	2	1	1	1.0
KJ010547	Caudovirales	Herelleviridae	Agatevirus	205_10	Clustered	3	VC_205_10	3	0.0655	0.99815441	0.0654	1	1	1	1.0
KJ010548	Caudovirales	Herelleviridae	Agatevirus	205_10	Clustered	3	VC_205_10	3	0.0655	0.99815441	0.0654	1	1	1	1.0
KJ019040	Caudovirales	Myoviridae	Nereusvirus	269_17	Clustered	8	VC_269_17	8	0.1336	1.0	0.1336	4	1	1	0.75
KJ019052	Caudovirales	Myoviridae	Atlauavirus	269_0	Clustered	3	VC_269_0	3	0.0594	0.99816681	0.0593	1	1	1	1.0
KJ019058	Caudovirales	Myoviridae	Atlauavirus	269_0	Clustered	3	VC_269_0	3	0.0594	0.99816681	0.0593	1	1	1	1.0
KJ019091	Caudovirales	Myoviridae	Atlauavirus	269_0	Clustered	3	VC_269_0	3	0.0594	0.99816681	0.0593	1	1	1	1.0
KJ019133	Caudovirales	Myoviridae	Nereusvirus	269_17	Clustered	8	VC_269_17	8	0.1336	1.0	0.1336	4	1	1	0.75
KJ081346	Caudovirales	Herelleviridae	Caeruleovirus	205_8	Clustered	2	VC_205_8	2	0.0249	0.94114854	0.0234	1	1	1	1.0
KJ094020	Caudovirales	Siphoviridae	Homburgvirus	186_0	Clustered	5	VC_186_0	5	0.9388	0.99999751	0.9388	1	1	1	1.0
KJ094021	Caudovirales	Siphoviridae	Homburgvirus	186_0	Clustered	5	VC_186_0	5	0.9388	0.99999751	0.9388	1	1	1	1.0
KJ094023	Caudovirales	Siphoviridae	Slepowronvirus	147_0	Clustered	5	VC_147_0	5	0.6479	0.99999992	0.6479	3	1	1	1.0
KJ094029	Caudovirales	Herelleviridae	Pecentumvirus	287_0	Clustered	13	VC_287_0	13	0.6972	1.0	0.6972	1	1	1	1.0
KJ094030	Caudovirales	Herelleviridae	Pecentumvirus	287_0	Clustered	13	VC_287_0	13	0.6972	1.0	0.6972	1	1	1	1.0
KJ094031	Caudovirales	Herelleviridae	Pecentumvirus	287_0	Clustered	13	VC_287_0	13	0.6972	1.0	0.6972	1	1	1	1.0
KJ094032	Caudovirales	Siphoviridae	Saphexavirus	185_0	Clustered	5	VC_185_0	5	0.8939	0.99999728	0.8939	1	1	1	1.0
KJ094033	Caudovirales	Herelleviridae	Pecentumvirus	287_0	Clustered	13	VC_287_0	13	0.6972	1.0	0.6972	1	1	1	1.0
KJ135004	Caudovirales	Schitoviridae	Gamaleyavirus	361_1	Clustered	26	VC_361_1	26	606	1.0	606	14	1	1	0.7323
KJ173786	Caudovirales	Siphoviridae	Farahnazvirus	383_0	Clustered	3	VC_383_0	3	0.5877	0.98867275	0.5811	3	1	1	1.0
KJ174317	Caudovirales	Ackermannviridae	Kuttervirus	192_1	Clustered	35	VC_192_1	35	0.4572	1.0	0.4572	1	1	1	1.0
KJ174318	Caudovirales	Ackermannviridae	Kuttervirus	192_1	Clustered	35	VC_192_1	35	0.4572	1.0	0.4572	1	1	1	1.0
KJ190157	Caudovirales	Demerecviridae	Tequintavirus	295_1	Clustered	28	VC_295_1	28	0.5228	1.0	0.5228	1	1	1	0.9974
KJ194582	Caudovirales	Siphoviridae	Hawkeyevirus	312_0	Clustered	2	VC_312_0	2	0.1182	0.94941622	0.1123	2	1	1	1.0
KJ210330	Caudovirales	Rountreeviridae	Rosenblumvirus	181_0	Clustered	14	VC_181_0	14	0.7491	1.0	0.7491	2	1	1	1.0
KJ419279	Caudovirales	Siphoviridae	Nonagvirus	191_1	Clustered	6	VC_191_1	6	567	1.0	567	2	1	1	1.0
KJ451625	Caudovirales	Herelleviridae	Caeruleovirus	205_9	Clustered	4	VC_205_9	4	0.0782	0.99996515	0.0782	1	1	1	0.8333
KJ452291	Caudovirales	Siphoviridae	Phietavirus	138_0	Clustered	27	VC_138_0	27	0.4034	1.0	0.4034	1	1	1	0.9943
KJ452292	Caudovirales	Siphoviridae	Biseptimavirus	136_0	Clustered	24	VC_136_0	24	0.4703	1.0	0.4703	2	1	1	0.7717
KJ473423	Caudovirales	Autographiviridae	Daemvirus	390_0	Clustered	23	VC_390_0	23	1.0	1.0	1.0	3	1	1	1.0
KJ489010	Caudovirales	Siphoviridae	Nevevirus	374_0	Clustered	4	VC_374_0	4	403	0.99997778	403	1	1	1	1.0
KJ489011	Caudovirales	Siphoviridae	Nevevirus	374_0	Clustered	4	VC_374_0	4	403	0.99997778	403	1	1	1	1.0
KJ489012	Caudovirales	Siphoviridae	Nevevirus	374_0	Clustered	4	VC_374_0	4	403	0.99997778	403	1	1	1	1.0
KJ489013	Caudovirales	Siphoviridae	Nevevirus	374_0	Clustered	4	VC_374_0	4	403	0.99997778	403	1	1	1	1.0
KJ489397	Caudovirales	Herelleviridae	Bastillevirus	205_4	Clustered	4	VC_205_4	4	0.0789	0.99998373	0.0789	1	1	1	1.0
KJ489398	Caudovirales	Herelleviridae	Bastillevirus	205_4	Clustered	4	VC_205_4	4	0.0789	0.99998373	0.0789	1	1	1	1.0
KJ489400	Caudovirales	Herelleviridae	Bastillevirus	205_4	Clustered	4	VC_205_4	4	0.0789	0.99998373	0.0789	1	1	1	1.0
KJ489402	Caudovirales	Herelleviridae	Bequatrovirus	205_5	Clustered	4	VC_205_5	4	0.0753	0.99994012	0.0753	1	1	1	1.0
KJ502657	Caudovirales	Autographiviridae	Gutovirus	273_0	Clustered	36	VC_273_0	36	1.0	1.0	1.0	12	1	1	1.0
KJ507099	Caudovirales	Autographiviridae	Ghunavirus	172_0	Clustered	19	VC_172_0	19	0.6376	1.0	0.6376	6	1	1	1.0
KJ510413	Caudovirales	Siphoviridae	Bernalvirus	218_0	Clustered	2	VC_218_0	2	0.0552	0.92866856	0.0512	2	1	1	0.0
KJ535721	Caudovirales	Herelleviridae	Pecentumvirus	287_0	Clustered	13	VC_287_0	13	0.6972	1.0	0.6972	1	1	1	1.0
KJ535722	Caudovirales	Herelleviridae	Pecentumvirus	287_0	Clustered	13	VC_287_0	13	0.6972	1.0	0.6972	1	1	1	1.0
KJ538721	Caudovirales	Siphoviridae	Marvinvirus	303_0	Clustered	2	VC_303_0	2	0.8199	0.94172064	0.7721	1	1	1	1.0
KJ564036	Caudovirales	Siphoviridae	Cequinquevirus	334_0	Clustered	6	VC_334_0	6	1.0	1.0	1.0	1	1	1	1.0
KJ564037	Caudovirales	Siphoviridae	Cequinquevirus	334_0	Clustered	6	VC_334_0	6	1.0	1.0	1.0	1	1	1	1.0
KJ564038	Caudovirales	Siphoviridae	Cequinquevirus	334_0	Clustered	6	VC_334_0	6	1.0	1.0	1.0	1	1	1	1.0
KJ578758	Caudovirales	Siphoviridae	Pahexavirus	350_0	Clustered	57	VC_350_0	57	1.0	1.0	1.0	1	1	1	1.0
KJ578759	Caudovirales	Siphoviridae	Pahexavirus	350_0	Clustered	57	VC_350_0	57	1.0	1.0	1.0	1	1	1	1.0
KJ578761	Caudovirales	Siphoviridae	Pahexavirus	350_0	Clustered	57	VC_350_0	57	1.0	1.0	1.0	1	1	1	1.0
KJ578765	Caudovirales	Siphoviridae	Pahexavirus	350_0	Clustered	57	VC_350_0	57	1.0	1.0	1.0	1	1	1	1.0
KJ578767	Caudovirales	Siphoviridae	Pahexavirus	350_0	Clustered	57	VC_350_0	57	1.0	1.0	1.0	1	1	1	1.0
KJ578770	Caudovirales	Siphoviridae	Pahexavirus	350_0	Clustered	57	VC_350_0	57	1.0	1.0	1.0	1	1	1	1.0
KJ578773	Caudovirales	Siphoviridae	Pahexavirus	350_0	Clustered	57	VC_350_0	57	1.0	1.0	1.0	1	1	1	1.0
KJ578774	Caudovirales	Siphoviridae	Pahexavirus	350_0	Clustered	57	VC_350_0	57	1.0	1.0	1.0	1	1	1	1.0
KJ578776	Caudovirales	Siphoviridae	Pahexavirus	350_0	Clustered	57	VC_350_0	57	1.0	1.0	1.0	1	1	1	1.0
KJ578778	Caudovirales	Siphoviridae	Pahexavirus	350_0	Clustered	57	VC_350_0	57	1.0	1.0	1.0	1	1	1	1.0
KJ578779	Caudovirales	Siphoviridae	Pahexavirus	350_0	Clustered	57	VC_350_0	57	1.0	1.0	1.0	1	1	1	1.0
KJ578780	Caudovirales	Siphoviridae	Pahexavirus	350_0	Clustered	57	VC_350_0	57	1.0	1.0	1.0	1	1	1	1.0
KJ578781	Caudovirales	Siphoviridae	Pahexavirus	350_0	Clustered	57	VC_350_0	57	1.0	1.0	1.0	1	1	1	1.0
KJ578783	Caudovirales	Siphoviridae	Pahexavirus	350_0	Clustered	57	VC_350_0	57	1.0	1.0	1.0	1	1	1	1.0
KJ578784	Caudovirales	Siphoviridae	Pahexavirus	350_0	Clustered	57	VC_350_0	57	1.0	1.0	1.0	1	1	1	1.0
KJ578785	Caudovirales	Siphoviridae	Pahexavirus	350_0	Clustered	57	VC_350_0	57	1.0	1.0	1.0	1	1	1	1.0
KJ578786	Caudovirales	Siphoviridae	Pahexavirus	350_0	Clustered	57	VC_350_0	57	1.0	1.0	1.0	1	1	1	1.0
KJ578787	Caudovirales	Siphoviridae	Pahexavirus	350_0	Clustered	57	VC_350_0	57	1.0	1.0	1.0	1	1	1	1.0
KJ578788	Caudovirales	Siphoviridae	Pahexavirus	350_0	Clustered	57	VC_350_0	57	1.0	1.0	1.0	1	1	1	1.0
KJ578789	Caudovirales	Siphoviridae	Pahexavirus	350_0	Clustered	57	VC_350_0	57	1.0	1.0	1.0	1	1	1	1.0
KJ578790	Caudovirales	Siphoviridae	Pahexavirus	350_0	Clustered	57	VC_350_0	57	1.0	1.0	1.0	1	1	1	1.0
KJ578791	Caudovirales	Siphoviridae	Pahexavirus	350_0	Clustered	57	VC_350_0	57	1.0	1.0	1.0	1	1	1	1.0
KJ578792	Caudovirales	Siphoviridae	Pahexavirus	350_0	Clustered	57	VC_350_0	57	1.0	1.0	1.0	1	1	1	1.0
KJ586795	Caudovirales	Herelleviridae	Pecentumvirus	287_0	Clustered	13	VC_287_0	13	0.6972	1.0	0.6972	1	1	1	1.0
KJ591604	Caudovirales	Herelleviridae	Pecentumvirus	287_0	Clustered	13	VC_287_0	13	0.6972	1.0	0.6972	1	1	1	1.0
KJ591605	Caudovirales	Herelleviridae	Pecentumvirus	287_0	Clustered	13	VC_287_0	13	0.6972	1.0	0.6972	1	1	1	1.0
KJ603229	Caudovirales	Podoviridae	Diegovirus	108_0	Clustered	21	VC_108_0	21	0.7299	1.0	0.7299	3	1	1	0.8667
KJ668713	Caudovirales	Drexlerviridae	Rogunavirus	275_0	Clustered	18	VC_275_0	18	0.5723	1.0	0.5723	9	1	1	1.0
KJ668714	Caudovirales	Myoviridae	Tequatrovirus	223_17	Clustered/Singleton	1	VC_223_17	1	0.0	1.0	0.0	1	1	1	1.0
KJ676859	Caudovirales	Herelleviridae	Caeruleovirus	205_8	Clustered	2	VC_205_8	2	0.0249	0.94114854	0.0234	1	1	1	1.0
KJ716334	Caudovirales	Siphoviridae	Dubowvirus	138_1	Clustered	19	VC_138_1	19	0.3014	1.0	0.3014	2	1	1	0.9766
KJ716335	Caudovirales	Ackermannviridae	Limestonevirus	192_2	Clustered	7	VC_192_2	7	0.0588	0.98661488	58	2	1	1	1.0
KJ722067	Caudovirales	Siphoviridae	Pahexavirus	350_0	Clustered	57	VC_350_0	57	1.0	1.0	1.0	1	1	1	1.0
KJ748011	Caudovirales	Autographiviridae	Kayfunavirus	174_0	Clustered	19	VC_174_0	19	0.6886	1.0	0.6886	2	1	1	1.0
KJ749827	Caudovirales	Autographiviridae	Gajwadongvirus	273_0	Clustered	36	VC_273_0	36	1.0	1.0	1.0	12	1	1	1.0
KJ802832	Caudovirales	Siphoviridae	Nonanavirus	402_0	Clustered	4	VC_402_0	4	0.9207	0.99982029	0.9205	3	1	1	1.0
KJ804259	Caudovirales	Siphoviridae	Sextaecvirus	156_0	Clustered	2	VC_156_0	2	0.4116	0.95393721	0.3927	1	1	1	1.0
KJ817802	Caudovirales	Myoviridae	Obolenskvirus	130_0	Clustered	8	VC_130_0	8	0.8972	1.0	0.8972	1	1	1	1.0
KJ858521	Caudovirales	Chaseviridae	Pahsextavirus	369_0	Clustered	3	VC_369_0	3	0.2352	0.9974978	0.2346	2	1	1	1.0
KJ888149	Caudovirales	Herelleviridae	Kayvirus	194_1	Clustered	25	VC_194_1	25	639	1.0	639	1	1	1	0.9967
KM044272	Caudovirales	Podoviridae	Kuravirus	284_0	Clustered	6	VC_284_0	6	0.7396	1.0	0.7396	1	1	1	1.0
KM051843	Caudovirales	Herelleviridae	Agatevirus	205_10	Clustered	3	VC_205_10	3	0.0655	0.99815441	0.0654	1	1	1	1.0
KM067278	Caudovirales	Autographiviridae	Phikmvvirus	198_0	Clustered	16	VC_198_0	16	0.8348	1.0	0.8348	1	1	1	1.0
KM083128	Caudovirales	Siphoviridae	Sparkyvirus	218_0	Clustered	2	VC_218_0	2	0.0552	0.92866856	0.0512	2	1	1	0.0
KM091442	Caudovirales	Siphoviridae	Skunavirus	206_0	Clustered	95	VC_206_0	95	0.9999	1.0	0.9999	2	1	1	1.0
KM091444	Caudovirales	Siphoviridae	Skunavirus	206_0	Clustered	95	VC_206_0	95	0.9999	1.0	0.9999	2	1	1	1.0
KM092515	Caudovirales	Myoviridae	Felixounavirus	241_0	Clustered	23	VC_241_0	23	0.9281	1.0	0.9281	3	1	1	1.0
KM101124	Caudovirales	Siphoviridae	Squirtyvirus	215_4	Clustered/Singleton	1	VC_215_4	1	0.0	1.0	0.0	1	1	1	1.0
KM190144	Caudovirales	Myoviridae	Avunavirus	231_4	Clustered/Singleton	1	VC_231_4	1	0.0	1.0	0.0	1	1	1	1.0
KM199771	Caudovirales	Autographiviridae	Pairvirus	176_0	Clustered	13	VC_176_0	13	0.5639	1.0	0.5639	11	1	1	1.0
KM216423	Caudovirales	Herelleviridae	Kayvirus	194_1	Clustered	25	VC_194_1	25	639	1.0	639	1	1	1	0.9967
KM233151	Caudovirales	Siphoviridae	Dhillonvirus	71_0	Clustered	7	VC_71_0	7	0.5529	1.0	0.5529	1	1	1	1.0
KM236237	Caudovirales	Myoviridae	Pseudotevenvirus	291_1	Clustered	9	VC_291_1	9	0.2921	1.0	0.2921	1	1	1	1.0
KM236239	Caudovirales	Myoviridae	Mooglevirus	241_0	Clustered	23	VC_241_0	23	0.9281	1.0	0.9281	3	1	1	1.0
KM236241	Caudovirales	Drexlerviridae	Tlsvirus	276_0	Clustered	39	VC_276_0	39	0.7136	1.0	0.7136	9	1	1	807
KM236243	Caudovirales	Siphoviridae	Seuratvirus	191_0	Clustered	2	VC_191_0	2	0.1571	0.94967683	0.1492	1	1	1	1.0
KM236244	Caudovirales	Demerecviridae	Epseptimavirus	296_0	Clustered	32	VC_296_0	32	0.5628	1.0	0.5628	1	1	1	996
KM236245	Caudovirales	Herelleviridae	Matervirus	205_13	Clustered/Singleton	1	VC_205_13	1	0.0	1.0	0.0	1	1	1	1.0
KM236246	Caudovirales	Herelleviridae	Moonbeamvirus	205_12	Clustered	2	VC_205_12	2	0.0295	0.95554694	0.0281	2	1	1	1.0
KM236247	Caudovirales	Podoviridae	Pagevirus	141_0	Clustered	5	VC_141_0	5	0.8933	0.99999985	0.8933	1	1	1	1.0
KM236248	Caudovirales	Podoviridae	Pagevirus	141_0	Clustered	5	VC_141_0	5	0.8933	0.99999985	0.8933	1	1	1	1.0
KM242061	Caudovirales	Autographiviridae	Teseptimavirus	178_0	Clustered	44	VC_178_0	44	0.6136	1.0	0.6136	9	1	1	1.0
KM247287	Caudovirales	Autographiviridae	Bonnellvirus	199_0	Clustered	3	VC_199_0	3	0.1941	0.99845318	0.1938	2	1	1	1.0
KM253764	Caudovirales	Autographiviridae	Teetrevirus	178_0	Clustered	44	VC_178_0	44	0.6136	1.0	0.6136	9	1	1	1.0
KM262192	Caudovirales	Siphoviridae	Unaquatrovirus	386_0	Clustered	5	VC_386_0	5	471	0.99999906	471	1	1	1	1.0
KM272358	Caudovirales	Siphoviridae	Jerseyvirus	333_0	Clustered	18	VC_333_0	18	0.8639	1.0	0.8639	3	1	1	1.0
KM366097	Caudovirales	Autographiviridae	Zindervirus	273_0	Clustered	36	VC_273_0	36	1.0	1.0	1.0	12	1	1	1.0
KM366098	Caudovirales	Siphoviridae	Chivirus	324_0	Clustered	14	VC_324_0	14	0.7438	1.0	0.7438	1	1	1	1.0
KM366099	Caudovirales	Myoviridae	Rosemountvirus	131_0	Clustered	6	VC_131_0	6	947	1.0	947	2	1	1	1.0
KM366100	Caudovirales	Rountreeviridae	Rosenblumvirus	181_0	Clustered	14	VC_181_0	14	0.7491	1.0	0.7491	2	1	1	1.0
KM370384	Caudovirales	Autographiviridae	Tuodvirus	273_0	Clustered	36	VC_273_0	36	1.0	1.0	1.0	12	1	1	1.0
KM434184	Caudovirales	Myoviridae	Pbunavirus	170_0	Clustered	25	VC_170_0	25	0.7661	1.0	0.7661	1	1	1	1.0
KM501444	Caudovirales	Myoviridae	Tequatrovirus	223_13	Clustered	3	VC_223_13	3	12	0.95633777	0.0115	1	1	1	0.6667
KM507819	Caudovirales	Myoviridae	Asteriusvirus	202_4	Clustered	2	VC_202_4	2	0.0951	0.90825255	0.0864	1	1	1	1.0
KM576124	Caudovirales	Autographiviridae	Drulisvirus	188_0	Clustered	21	VC_188_0	21	0.7518	1.0	0.7518	3	1	1	1.0
KM606994	Caudovirales	Myoviridae	Tequatrovirus	223_5	Clustered	2	VC_223_5	2	0.0061	0.8336808	0.0051	1	1	1	1.0
KM607000	Caudovirales	Myoviridae	Tequatrovirus	223_6	Clustered	2	VC_223_6	2	0.0061	0.83610399	0.0051	1	1	1	1.0
KM652554	Caudovirales	Siphoviridae	Samistivirus	411_1	Clustered	6	VC_411_1	6	0.2577	1.0	0.2577	1	1	1	1.0
KM657822	Caudovirales	Myoviridae	Felixounavirus	241_0	Clustered	23	VC_241_0	23	0.9281	1.0	0.9281	3	1	1	1.0
KM677185	Caudovirales	Siphoviridae	Audreyjarvisvirus	207_0	Clustered	7	VC_207_0	7	0.9991	0.99993057	0.9991	1	1	1	1.0
KM819695	Caudovirales	Autographiviridae	Acadevirus	273_0	Clustered	36	VC_273_0	36	1.0	1.0	1.0	12	1	1	1.0
KM819696	Caudovirales	Autographiviridae	Acadevirus	273_0	Clustered	36	VC_273_0	36	1.0	1.0	1.0	12	1	1	1.0
KM873719	Caudovirales	Myoviridae	Ficleduovirus	413_0	Clustered	2	VC_413_0	2	1.0	1.0	1.0	1	1	1	1.0
KM879221	Caudovirales	Schitoviridae	Dendoorenvirus	361_1	Clustered	26	VC_361_1	26	606	1.0	606	14	1	1	0.7323
KM879463	Caudovirales	Myoviridae	Klausavirus	415_0	Clustered	6	VC_415_0	6	0.6394	1.0	0.6394	1	1	1	1.0
KM896878	Caudovirales	Siphoviridae	Dhillonvirus	71_0	Clustered	7	VC_71_0	7	0.5529	1.0	0.5529	1	1	1	1.0
KM979354	Caudovirales	Demerecviridae	Tequintavirus	295_1	Clustered	28	VC_295_1	28	0.5228	1.0	0.5228	1	1	1	0.9974
KM979355	Caudovirales	Demerecviridae	Tequintavirus	295_1	Clustered	28	VC_295_1	28	0.5228	1.0	0.5228	1	1	1	0.9974
KP010268	Caudovirales	Myoviridae	Muvirus	83_0	Clustered	13	VC_83_0	13	0.8428	1.0	0.8428	2	2	2	1.0
KP010413	Caudovirales	Myoviridae	Felixounavirus	241_0	Clustered	23	VC_241_0	23	0.9281	1.0	0.9281	3	1	1	1.0
KP025626	Caudovirales	Autographiviridae	Pifdecavirus	172_0	Clustered	19	VC_172_0	19	0.6376	1.0	0.6376	6	1	1	1.0
KP027200	Caudovirales	Siphoviridae	Fishburnevirus	301_0	Clustered	7	VC_301_0	7	0.4656	1.0	0.4656	3	1	1	1.0
KP027446	Caudovirales	Herelleviridae	Kayvirus	194_1	Clustered	25	VC_194_1	25	639	1.0	639	1	1	1	0.9967
KP027447	Caudovirales	Herelleviridae	Sepunavirus	194_2	Clustered	2	VC_194_2	2	0.0203	0.95453717	0.0194	1	1	1	1.0
KP037007	Caudovirales	Ackermannviridae	Nezavisimistyvirus	192_4	Clustered	2	VC_192_4	2	0.0111	0.95567384	0.0106	1	1	1	1.0
KP063541	Caudovirales	Myoviridae	Xuanwuvirus	26_0	Clustered	23	VC_26_0	23	0.7517	1.0	0.7517	6	2	2	0.9842
KP064094	Caudovirales	Siphoviridae	Seuratvirus	191_0	Clustered	2	VC_191_0	2	0.1571	0.94967683	0.1492	1	1	1	1.0
KP085586	Caudovirales	Drexlerviridae	Tunavirus	274_0	Clustered	18	VC_274_0	18	0.4852	1.0	0.4852	3	1	1	1.0
KP143762	Caudovirales	Myoviridae	Felixounavirus	241_0	Clustered	23	VC_241_0	23	0.9281	1.0	0.9281	3	1	1	1.0
KP143763	Caudovirales	Demerecviridae	Tequintavirus	295_0	Clustered	2	VC_295_0	2	0.0139	0.9563953	0.0133	1	1	1	1.0
KP202969	Caudovirales	Siphoviridae	Steinhofvirus	282_0	Clustered	2	VC_282_0	2	292	0.95145276	0.2778	1	1	1	1.0
KP202970	Caudovirales	Siphoviridae	Steinhofvirus	282_0	Clustered	2	VC_282_0	2	292	0.95145276	0.2778	1	1	1	1.0
KP202972	Caudovirales	Siphoviridae	Fernvirus	59_0	Clustered	18	VC_59_0	18	0.8255	1.0	0.8255	1	1	1	1.0
KP211958	Caudovirales	Myoviridae	Libanvirus	269_3	Clustered/Singleton	1	VC_269_3	1	0.0	1.0	0.0	1	1	1	1.0
KP233880	Caudovirales	Podoviridae	Bruynoghevirus	283_0	Clustered	11	VC_283_0	11	875	1.0	875	4	1	1	1.0
KP280062	Caudovirales	Schitoviridae	Pacinivirus	365_0	Clustered	2	VC_365_0	2	0.0654	0.95553563	0.0625	1	1	1	1.0
KP296791	Caudovirales	Siphoviridae	Fernvirus	59_0	Clustered	18	VC_59_0	18	0.8255	1.0	0.8255	1	1	1	1.0
KP296793	Caudovirales	Siphoviridae	Fernvirus	59_0	Clustered	18	VC_59_0	18	0.8255	1.0	0.8255	1	1	1	1.0
KP296795	Caudovirales	Siphoviridae	Fernvirus	59_0	Clustered	18	VC_59_0	18	0.8255	1.0	0.8255	1	1	1	1.0
KP296796	Caudovirales	Siphoviridae	Fernvirus	59_0	Clustered	18	VC_59_0	18	0.8255	1.0	0.8255	1	1	1	1.0
KP308307	Caudovirales	Podoviridae	Kuravirus	284_0	Clustered	6	VC_284_0	6	0.7396	1.0	0.7396	1	1	1	1.0
KP313531	Caudovirales	Autographiviridae	Teetrevirus	178_0	Clustered	44	VC_178_0	44	0.6136	1.0	0.6136	9	1	1	1.0
KP340288	Caudovirales	Myoviridae	Pbunavirus	170_0	Clustered	25	VC_170_0	25	0.7661	1.0	0.7661	1	1	1	1.0
KP411017	Caudovirales	Podoviridae	Pagevirus	141_0	Clustered	5	VC_141_0	5	0.8933	0.99999985	0.8933	1	1	1	1.0
KP658157	Caudovirales	Drexlerviridae	Webervirus	321_0	Clustered	31	VC_321_0	31	0.9569	1.0	0.9569	1	1	1	1.0
KP671755	Caudovirales	Myoviridae	Schizotequatrovirus	226_0	Clustered	3	VC_226_0	3	0.1354	0.99858145	0.1352	1	1	1	1.0
KP682371	Caudovirales	Podoviridae	Oslovirus	108_0	Clustered	21	VC_108_0	21	0.7299	1.0	0.7299	3	1	1	0.8667
KP682381	Caudovirales	Podoviridae	Traversvirus	108_0	Clustered	21	VC_108_0	21	0.7299	1.0	0.7299	3	1	1	0.8667
KP687431	Caudovirales	Herelleviridae	Kayvirus	194_1	Clustered	25	VC_194_1	25	639	1.0	639	1	1	1	0.9967
KP687432	Caudovirales	Herelleviridae	Kayvirus	194_1	Clustered	25	VC_194_1	25	639	1.0	639	1	1	1	0.9967
KP696447	Caudovirales	Siphoviridae	Slashvirus	409_0	Clustered	4	VC_409_0	4	0.9983	0.96662349	965	1	1	1	1.0
KP696448	Caudovirales	Siphoviridae	Slashvirus	409_0	Clustered	4	VC_409_0	4	0.9983	0.96662349	965	1	1	1	1.0
KP708985	Caudovirales	Autographiviridae	Drulisvirus	188_0	Clustered	21	VC_188_0	21	0.7518	1.0	0.7518	3	1	1	1.0
KP708986	Caudovirales	Autographiviridae	Drulisvirus	188_0	Clustered	21	VC_188_0	21	0.7518	1.0	0.7518	3	1	1	1.0
KP719132	Caudovirales	Siphoviridae	Nonagvirus	191_1	Clustered	6	VC_191_1	6	567	1.0	567	2	1	1	1.0
KP719133	Caudovirales	Siphoviridae	Nonagvirus	191_1	Clustered	6	VC_191_1	6	567	1.0	567	2	1	1	1.0
KP719134	Caudovirales	Siphoviridae	Nonagvirus	191_1	Clustered	6	VC_191_1	6	567	1.0	567	2	1	1	1.0
KP774835	Caudovirales	Zobellviridae	Citrovirus	233_0	Clustered	5	VC_233_0	5	0.4871	0.99997176	0.4871	5	1	1	1.0
KP790011	Caudovirales	Siphoviridae	Gesputvirus	265_0	Clustered	2	VC_265_0	2	0.3653	0.95159433	0.3476	2	1	1	1.0
KP791805	Caudovirales	Autographiviridae	Teetrevirus	178_0	Clustered	44	VC_178_0	44	0.6136	1.0	0.6136	9	1	1	1.0
KP791806	Caudovirales	Autographiviridae	Teetrevirus	178_0	Clustered	44	VC_178_0	44	0.6136	1.0	0.6136	9	1	1	1.0
KP793102	Caudovirales	Siphoviridae	Skunavirus	206_0	Clustered	95	VC_206_0	95	0.9999	1.0	0.9999	2	1	1	1.0
KP793104	Caudovirales	Siphoviridae	Skunavirus	206_0	Clustered	95	VC_206_0	95	0.9999	1.0	0.9999	2	1	1	1.0
KP793105	Caudovirales	Siphoviridae	Skunavirus	206_0	Clustered	95	VC_206_0	95	0.9999	1.0	0.9999	2	1	1	1.0
KP793108	Caudovirales	Siphoviridae	Skunavirus	206_0	Clustered	95	VC_206_0	95	0.9999	1.0	0.9999	2	1	1	1.0
KP793118	Caudovirales	Siphoviridae	Skunavirus	206_0	Clustered	95	VC_206_0	95	0.9999	1.0	0.9999	2	1	1	1.0
KP793120	Caudovirales	Siphoviridae	Skunavirus	206_0	Clustered	95	VC_206_0	95	0.9999	1.0	0.9999	2	1	1	1.0
KP793121	Caudovirales	Siphoviridae	Skunavirus	206_0	Clustered	95	VC_206_0	95	0.9999	1.0	0.9999	2	1	1	1.0
KP793122	Caudovirales	Siphoviridae	Skunavirus	206_0	Clustered	95	VC_206_0	95	0.9999	1.0	0.9999	2	1	1	1.0
KP793123	Caudovirales	Siphoviridae	Skunavirus	206_0	Clustered	95	VC_206_0	95	0.9999	1.0	0.9999	2	1	1	1.0
KP793124	Caudovirales	Siphoviridae	Skunavirus	206_0	Clustered	95	VC_206_0	95	0.9999	1.0	0.9999	2	1	1	1.0
KP793125	Caudovirales	Siphoviridae	Skunavirus	206_0	Clustered	95	VC_206_0	95	0.9999	1.0	0.9999	2	1	1	1.0
KP793129	Caudovirales	Siphoviridae	Skunavirus	206_0	Clustered	95	VC_206_0	95	0.9999	1.0	0.9999	2	1	1	1.0
KP793130	Caudovirales	Siphoviridae	Skunavirus	206_0	Clustered	95	VC_206_0	95	0.9999	1.0	0.9999	2	1	1	1.0
KP793131	Caudovirales	Siphoviridae	Skunavirus	206_0	Clustered	95	VC_206_0	95	0.9999	1.0	0.9999	2	1	1	1.0
KP793132	Caudovirales	Siphoviridae	Skunavirus	206_0	Clustered	95	VC_206_0	95	0.9999	1.0	0.9999	2	1	1	1.0
KP793133	Caudovirales	Siphoviridae	Skunavirus	206_0	Clustered	95	VC_206_0	95	0.9999	1.0	0.9999	2	1	1	1.0
KP793134	Caudovirales	Siphoviridae	Skunavirus	206_0	Clustered	95	VC_206_0	95	0.9999	1.0	0.9999	2	1	1	1.0
KP797973	Caudovirales	Ackermannviridae	Kuttervirus	192_1	Clustered	35	VC_192_1	35	0.4572	1.0	0.4572	1	1	1	1.0
KP861230	Caudovirales	Siphoviridae	Vieuvirus	118_0	Clustered	2	VC_118_0	2	0.9719	0.72985431	0.7093	1	1	1	1.0
KP869100	Caudovirales	Myoviridae	Felixounavirus	241_0	Clustered	23	VC_241_0	23	0.9281	1.0	0.9281	3	1	1	1.0
KP876465	Caudovirales	Siphoviridae	Woodruffvirus	417_0	Clustered	2	VC_417_0	2	1.0	1.0	1.0	1	1	1	1.0
KP876466	Caudovirales	Siphoviridae	Woodruffvirus	417_0	Clustered	2	VC_417_0	2	1.0	1.0	1.0	1	1	1	1.0
KP881332	Caudovirales	Herelleviridae	Silviavirus	194_3	Clustered	4	VC_194_3	4	0.0672	0.99998269	0.0672	1	1	1	1.0
KP890822	Caudovirales	Autographiviridae	Acadevirus	273_0	Clustered	36	VC_273_0	36	1.0	1.0	1.0	12	1	1	1.0
KP893289	Caudovirales	Siphoviridae	Phietavirus	138_0	Clustered	27	VC_138_0	27	0.4034	1.0	0.4034	1	1	1	0.9943
KP893290	Caudovirales	Siphoviridae	Phietavirus	138_0	Clustered	27	VC_138_0	27	0.4034	1.0	0.4034	1	1	1	0.9943
KR011062	Caudovirales	Siphoviridae	Tinduovirus	392_1	Clustered	4	VC_392_1	4	129	0.97264043	0.1254	2	1	1	1.0
KR011063	Caudovirales	Siphoviridae	Tinduovirus	392_1	Clustered	4	VC_392_1	4	129	0.97264043	0.1254	2	1	1	1.0
KR014248	Caudovirales	Myoviridae	Felixounavirus	241_0	Clustered	23	VC_241_0	23	0.9281	1.0	0.9281	3	1	1	1.0
KR052143	Caudovirales	Myoviridae	Pakpunavirus	164_0	Clustered	11	VC_164_0	11	0.6553	1.0	0.6553	1	1	1	1.0
KR052480	Caudovirales	Myoviridae	Emdodecavirus	271_0	Clustered	3	VC_271_0	3	0.1987	0.99840751	0.1984	1	1	1	1.0
KR052482	Caudovirales	Myoviridae	Emdodecavirus	271_0	Clustered	3	VC_271_0	3	0.1987	0.99840751	0.1984	1	1	1	1.0
KR054030	Caudovirales	Myoviridae	Pbunavirus	170_0	Clustered	25	VC_170_0	25	0.7661	1.0	0.7661	1	1	1	1.0
KR054031	Caudovirales	Autographiviridae	Phikmvvirus	198_0	Clustered	16	VC_198_0	16	0.8348	1.0	0.8348	1	1	1	1.0
KR054033	Caudovirales	Myoviridae	Pbunavirus	170_0	Clustered	25	VC_170_0	25	0.7661	1.0	0.7661	1	1	1	1.0
KR063278	Caudovirales	Siphoviridae	Getseptimavirus	392_1	Clustered	4	VC_392_1	4	129	0.97264043	0.1254	2	1	1	1.0
KR073660	Caudovirales	Myoviridae	Peduovirus	29_0	Clustered	32	VC_29_0	32	0.5208	1.0	0.5208	6	2	2	1.0
KR073661	Caudovirales	Myoviridae	Peduovirus	29_0	Clustered	32	VC_29_0	32	0.5208	1.0	0.5208	6	2	2	1.0
KR080194	Caudovirales	Siphoviridae	Coopervirus	255_1	Clustered	13	VC_255_1	13	0.4839	1.0	0.4839	2	1	1	1.0
KR080195	Caudovirales	Siphoviridae	Phayoncevirus	301_0	Clustered	7	VC_301_0	7	0.4656	1.0	0.4656	3	1	1	1.0
KR080199	Caudovirales	Siphoviridae	Acadianvirus	255_1	Clustered	13	VC_255_1	13	0.4839	1.0	0.4839	2	1	1	1.0
KR091952	Caudovirales	Autographiviridae	Ghunavirus	172_0	Clustered	19	VC_172_0	19	0.6376	1.0	0.6376	6	1	1	1.0
KR131750	Caudovirales	Siphoviridae	Efquatrovirus	261_0	Clustered	13	VC_261_0	13	0.9791	1.0	0.9791	1	1	1	1.0
KR136259	Caudovirales	Siphoviridae	Incheonvrus	420_0	Clustered	2	VC_420_0	2	1.0	1.0	1.0	1	1	1	1.0
KR136260	Caudovirales	Siphoviridae	Incheonvrus	420_0	Clustered	2	VC_420_0	2	1.0	1.0	1.0	1	1	1	1.0
KR149290	Caudovirales	Autographiviridae	Friunavirus	390_0	Clustered	23	VC_390_0	23	1.0	1.0	1.0	3	1	1	1.0
KR149291	Caudovirales	Autographiviridae	Przondovirus	263_0	Clustered	25	VC_263_0	25	0.7384	1.0	0.7384	1	1	1	1.0
KR233164	Caudovirales	Demerecviridae	Tequintavirus	295_1	Clustered	28	VC_295_1	28	0.5228	1.0	0.5228	1	1	1	0.9974
KR262148	Caudovirales	Drexlerviridae	Webervirus	321_0	Clustered	31	VC_321_0	31	0.9569	1.0	0.9569	1	1	1	1.0
KR269718	Caudovirales	Myoviridae	Tequatrovirus	223_30	Clustered/Singleton	1	VC_223_30	1	0.0	1.0	0.0	1	1	1	1.0
KR269719	Caudovirales	Drexlerviridae	Webervirus	321_0	Clustered	31	VC_321_0	31	0.9569	1.0	0.9569	1	1	1	1.0
KR270151	Caudovirales	Siphoviridae	Jerseyvirus	333_0	Clustered	18	VC_333_0	18	0.8639	1.0	0.8639	3	1	1	1.0
KR296689	Caudovirales	Siphoviridae	Chivirus	324_0	Clustered	14	VC_324_0	14	0.7438	1.0	0.7438	1	1	1	1.0
KR296690	Caudovirales	Drexlerviridae	Tlsvirus	276_0	Clustered	39	VC_276_0	39	0.7136	1.0	0.7136	9	1	1	807
KR296691	Caudovirales	Siphoviridae	Chivirus	324_0	Clustered	14	VC_324_0	14	0.7438	1.0	0.7438	1	1	1	1.0
KR296692	Caudovirales	Ackermannviridae	Kuttervirus	192_1	Clustered	35	VC_192_1	35	0.4572	1.0	0.4572	1	1	1	1.0
KR337643	Caudovirales	Siphoviridae	Pahexavirus	350_0	Clustered	57	VC_350_0	57	1.0	1.0	1.0	1	1	1	1.0
KR337644	Caudovirales	Siphoviridae	Pahexavirus	350_0	Clustered	57	VC_350_0	57	1.0	1.0	1.0	1	1	1	1.0
KR337645	Caudovirales	Siphoviridae	Pahexavirus	350_0	Clustered	57	VC_350_0	57	1.0	1.0	1.0	1	1	1	1.0
KR337646	Caudovirales	Siphoviridae	Pahexavirus	350_0	Clustered	57	VC_350_0	57	1.0	1.0	1.0	1	1	1	1.0
KR337647	Caudovirales	Siphoviridae	Pahexavirus	350_0	Clustered	57	VC_350_0	57	1.0	1.0	1.0	1	1	1	1.0
KR337648	Caudovirales	Siphoviridae	Pahexavirus	350_0	Clustered	57	VC_350_0	57	1.0	1.0	1.0	1	1	1	1.0
KR337649	Caudovirales	Siphoviridae	Pahexavirus	350_0	Clustered	57	VC_350_0	57	1.0	1.0	1.0	1	1	1	1.0
KR337650	Caudovirales	Siphoviridae	Pahexavirus	350_0	Clustered	57	VC_350_0	57	1.0	1.0	1.0	1	1	1	1.0
KR337651	Caudovirales	Siphoviridae	Pahexavirus	350_0	Clustered	57	VC_350_0	57	1.0	1.0	1.0	1	1	1	1.0
KR337652	Caudovirales	Siphoviridae	Pahexavirus	350_0	Clustered	57	VC_350_0	57	1.0	1.0	1.0	1	1	1	1.0
KR337653	Caudovirales	Siphoviridae	Pahexavirus	350_0	Clustered	57	VC_350_0	57	1.0	1.0	1.0	1	1	1	1.0
KR337654	Caudovirales	Siphoviridae	Pahexavirus	350_0	Clustered	57	VC_350_0	57	1.0	1.0	1.0	1	1	1	1.0
KR422353	Caudovirales	Demerecviridae	Tequintavirus	295_1	Clustered	28	VC_295_1	28	0.5228	1.0	0.5228	1	1	1	0.9974
KR534323	Caudovirales	Myoviridae	Shandongvirus	169_0	Clustered	2	VC_169_0	2	0.2754	0.95299085	0.2625	2	1	1	1.0
KR560069	Caudovirales	Myoviridae	Menderavirus	193_0	Clustered	3	VC_193_0	3	0.2405	0.99840224	0.2401	1	1	1	1.0
KR604693	Caudovirales	Autographiviridae	Phimunavirus	189_0	Clustered	17	VC_189_0	17	0.7922	1.0	0.7922	4	1	1	1.0
KR781488	Caudovirales	Podoviridae	Oslovirus	108_0	Clustered	21	VC_108_0	21	0.7299	1.0	0.7299	3	1	1	0.8667
KR869157	Caudovirales	Myoviridae	Pbunavirus	170_0	Clustered	25	VC_170_0	25	0.7661	1.0	0.7661	1	1	1	1.0
KR869820	Caudovirales	Myoviridae	Pseudotevenvirus	291_1	Clustered	9	VC_291_1	9	0.2921	1.0	0.2921	1	1	1	1.0
KR902361	Caudovirales	Herelleviridae	Kayvirus	194_1	Clustered	25	VC_194_1	25	639	1.0	639	1	1	1	0.9967
KR905068	Caudovirales	Siphoviridae	Iaduovirus	221_0	Clustered	2	VC_221_0	2	0.4384	0.9316795	0.4085	2	1	1	1.0
KR908644	Caudovirales	Herelleviridae	Kayvirus	194_1	Clustered	25	VC_194_1	25	639	1.0	639	1	1	1	0.9967
KR935213	Caudovirales	Siphoviridae	Titanvirus	278_0	Clustered	7	VC_278_0	7	0.5424	1.0	0.5424	4	1	1	1.0
KR935215	Caudovirales	Siphoviridae	Titanvirus	278_0	Clustered	7	VC_278_0	7	0.5424	1.0	0.5424	4	1	1	1.0
KR997932	Caudovirales	Siphoviridae	Rosebushvirus	255_2	Clustered	4	VC_255_2	4	123	0.9999796	123	2	1	1	1.0
KT001918	Caudovirales	Myoviridae	Slopekvirus	291_0	Clustered	6	VC_291_0	6	0.1637	0.99999999	0.1637	1	1	1	1.0
KT001919	Caudovirales	Myoviridae	Slopekvirus	291_0	Clustered	6	VC_291_0	6	0.1637	0.99999999	0.1637	1	1	1	1.0
KT001920	Caudovirales	Drexlerviridae	Webervirus	321_0	Clustered	31	VC_321_0	31	0.9569	1.0	0.9569	1	1	1	1.0
KT008108	Caudovirales	Autographiviridae	Teetrevirus	178_0	Clustered	44	VC_178_0	44	0.6136	1.0	0.6136	9	1	1	1.0
KT124227	Caudovirales	Siphoviridae	Likavirus	401_0	Clustered	14	VC_401_0	14	0.9814	1.0	0.9814	4	1	1	1.0
KT124228	Caudovirales	Siphoviridae	Likavirus	401_0	Clustered	14	VC_401_0	14	0.9814	1.0	0.9814	4	1	1	1.0
KT124229	Caudovirales	Siphoviridae	Likavirus	401_0	Clustered	14	VC_401_0	14	0.9814	1.0	0.9814	4	1	1	1.0
KT151956	Caudovirales	Myoviridae	Jimmervirus	338_0	Clustered	4	VC_338_0	4	0.9003	0.99985574	0.9001	2	1	1	1.0
KT152029	Caudovirales	Siphoviridae	Likavirus	401_0	Clustered	14	VC_401_0	14	0.9814	1.0	0.9814	4	1	1	1.0
KT184308	Caudovirales	Myoviridae	Tequatrovirus	223_22	Clustered	3	VC_223_22	3	0.0122	0.95608072	0.0117	1	1	1	0.6667
KT184311	Caudovirales	Myoviridae	Tequatrovirus	223_22	Clustered	3	VC_223_22	3	0.0122	0.95608072	0.0117	1	1	1	0.6667
KT184312	Caudovirales	Myoviridae	Tequatrovirus	223_22	Clustered	3	VC_223_22	3	0.0122	0.95608072	0.0117	1	1	1	0.6667
KT184390	Caudovirales	Siphoviridae	Likavirus	401_0	Clustered	14	VC_401_0	14	0.9814	1.0	0.9814	4	1	1	1.0
KT184391	Caudovirales	Siphoviridae	Likavirus	401_0	Clustered	14	VC_401_0	14	0.9814	1.0	0.9814	4	1	1	1.0
KT184661	Caudovirales	Autographiviridae	Aghbyvirus	160_0	Clustered	14	VC_160_0	14	0.6396	1.0	0.6396	8	1	1	1.0
KT186228	Caudovirales	Siphoviridae	Camvirus	401_0	Clustered	14	VC_401_0	14	0.9814	1.0	0.9814	4	1	1	1.0
KT186243	Caudovirales	Siphoviridae	Triavirus	137_0	Clustered	23	VC_137_0	23	0.6591	1.0	0.6591	1	1	1	1.0
KT224359	Caudovirales	Herelleviridae	Tsarbombavirus	205_0	Clustered	3	VC_205_0	3	0.0521	0.99842482	52	1	1	1	1.0
KT240186	Caudovirales	Autographiviridae	Stompvirus	189_0	Clustered	17	VC_189_0	17	0.7922	1.0	0.7922	4	1	1	1.0
KT266805	Caudovirales	Siphoviridae	Xiamenvirus	279_0	Clustered	2	VC_279_0	2	0.5164	0.94677468	489	1	1	1	1.0
KT270441	Caudovirales	Siphoviridae	Coopervirus	255_1	Clustered	13	VC_255_1	13	0.4839	1.0	0.4839	2	1	1	1.0
KT281790	Caudovirales	Myoviridae	Bixzunavirus	311_0	Clustered	7	VC_311_0	7	998	0.99999972	998	1	1	1	1.0
KT307976	Caudovirales	Herelleviridae	Bequatrovirus	205_5	Clustered	4	VC_205_5	4	0.0753	0.99994012	0.0753	1	1	1	1.0
KT321315	Caudovirales	Myoviridae	Slopekvirus	291_0	Clustered	6	VC_291_0	6	0.1637	0.99999999	0.1637	1	1	1	1.0
KT321317	Caudovirales	Schitoviridae	Dongdastvirus	361_1	Clustered	26	VC_361_1	26	606	1.0	606	14	1	1	0.7323
KT339321	Caudovirales	Autographiviridae	Friunavirus	390_0	Clustered	23	VC_390_0	23	1.0	1.0	1.0	3	1	1	1.0
KT344895	Caudovirales	Siphoviridae	Phietavirus	138_0	Clustered	27	VC_138_0	27	0.4034	1.0	0.4034	1	1	1	0.9943
KT347313	Caudovirales	Siphoviridae	Fishburnevirus	301_0	Clustered	7	VC_301_0	7	0.4656	1.0	0.4656	3	1	1	1.0
KT361649	Caudovirales	Siphoviridae	Fernvirus	59_0	Clustered	18	VC_59_0	18	0.8255	1.0	0.8255	1	1	1	1.0
KT361651	Caudovirales	Siphoviridae	Harrisonvirus	330_0	Clustered	4	VC_330_0	4	0.1196	0.99837995	0.1194	4	1	1	0.8333
KT361654	Caudovirales	Siphoviridae	Vegasvirus	330_0	Clustered	4	VC_330_0	4	0.1196	0.99837995	0.1194	4	1	1	0.8333
KT363872	Caudovirales	Myoviridae	Mooglevirus	241_0	Clustered	23	VC_241_0	23	0.9281	1.0	0.9281	3	1	1	1.0
KT365401	Caudovirales	Myoviridae	Marthavirus	414_0	Clustered	8	VC_414_0	8	0.6584	1.0	0.6584	1	1	1	1.0
KT367885	Caudovirales	Autographiviridae	Przondovirus	263_0	Clustered	25	VC_263_0	25	0.7384	1.0	0.7384	1	1	1	1.0
KT367886	Caudovirales	Autographiviridae	Drulisvirus	188_0	Clustered	21	VC_188_0	21	0.7518	1.0	0.7518	3	1	1	1.0
KT381879	Caudovirales	Autographiviridae	Percyvirus	159_0	Clustered	20	VC_159_0	20	0.4495	1.0	0.4495	15	1	1	1.0
KT381880	Caudovirales	Myoviridae	Pseudotevenvirus	291_1	Clustered	9	VC_291_1	9	0.2921	1.0	0.2921	1	1	1	1.0
KT388102	Caudovirales	Autographiviridae	Friunavirus	390_0	Clustered	23	VC_390_0	23	1.0	1.0	1.0	3	1	1	1.0
KT388103	Caudovirales	Autographiviridae	Friunavirus	390_0	Clustered	23	VC_390_0	23	1.0	1.0	1.0	3	1	1	1.0
KT454805	Caudovirales	Myoviridae	Suspvirus	241_0	Clustered	23	VC_241_0	23	0.9281	1.0	0.9281	3	1	1	1.0
KT454806	Caudovirales	Myoviridae	Suspvirus	241_0	Clustered	23	VC_241_0	23	0.9281	1.0	0.9281	3	1	1	1.0
KT624200	Caudovirales	Myoviridae	Thornevirus	394_1	Clustered/Singleton	1	VC_394_1	1	0.0	1.0	0.0	1	1	1	1.0
KT630644	Caudovirales	Myoviridae	Eganvirus	29_0	Clustered	32	VC_29_0	32	0.5208	1.0	0.5208	6	2	2	1.0
KT630645	Caudovirales	Myoviridae	Senquatrovirus	26_0	Clustered	23	VC_26_0	23	0.7517	1.0	0.7517	6	2	2	0.9842
KT630647	Caudovirales	Myoviridae	Felsduovirus	27_0	Clustered	15	VC_27_0	15	0.3014	1.0	0.3014	2	2	2	1.0
KT630649	Caudovirales	Myoviridae	Brunovirus	47_0	Clustered	13	VC_47_0	13	0.7006	1.0	0.7006	2	2	2	0.9872
KT725776	Caudovirales	Siphoviridae	Hubeivirus	348_0	Clustered	3	VC_348_0	3	0.1537	0.99033602	0.1522	2	1	1	1.0
KT734862	Caudovirales	Siphoviridae	Yuavirus	277_0	Clustered	8	VC_277_0	8	0.6564	1.0	0.6564	2	1	1	1.0
KT755656	Caudovirales	Siphoviridae	Halcyonevirus	422_0	Clustered	5	VC_422_0	5	0.9642	0.99865287	0.9629	1	1	1	1.0
[truncated: 1,788 more rows]
