# Supplementary material for: Genomic Analysis Unveils the Pervasiveness and Diversity of Prophages Infecting Erwinia Species
Source: Pathogens. 2022 Dec 27;12(1):44. doi: 10.3390/pathogens12010044 (PMC9866893; doi:10.3390/pathogens12010044)
Supplement: Supplementary file 1 [file pathogens-12-00044-s001.zip › Table_S4 - prophagos_classificados_vcontact2_vpf-class.xlsx]

## Sheet: Planilha1
Table S4. Taxonomic assignment of prophages (243 sequences) conducted by vConTACT2 and VPF-class. The prophage completeness provided by PHASTER was included.
Phage ID	prophage completeness	Taxonomy	Tool
6#Erwinia_sp_S38	intact	siphoviridae/roufvirus	vConTACT2
6#Erwinia_billingiae_PBb	incomplete	myoviridae/rahariannevirus	vConTACT2
2#Erwinia_sp_S43	intact	siphoviridae/roufvirus	vConTACT2
2#Erwinia_endophytica_A41C3	intact	siphoviridae/roufvirus	vConTACT2
9#Erwinia_typographi_M043b	intact	Siphoviridae	VPF-Class
9#Erwinia_tracheiphila_PSU_1	intact	Myoviridae	VPF-Class
9#Erwinia_tracheiphila_BuffGH	intact	Myoviridae/Muvirus	VPF-Class
8#Erwinia_tracheiphila_PSU_1	incomplete	Myoviridae/Pbunavirus	VPF-Class
8#Erwinia_tracheiphila_BHKY	intact	Myoviridae/Muvirus	VPF-Class
8#Erwinia_sp_S38	intact	Myoviridae/Muvirus	VPF-Class
8#Erwinia_sp_OAMSP11	intact	Siphoviridae	VPF-Class
7#Erwinia_sp_OLMTSP26	intact	Siphoviridae	VPF-Class
7#Erwinia_sp_OLMDSP33	incomplete	Myoviridae/Pbunavirus	VPF-Class
7#Erwinia_sp_OLFS4	intact	Siphoviridae	VPF-Class
7#Erwinia_sp_OLCASP19	incomplete	Myoviridae/Pbunavirus	VPF-Class
7#Erwinia_sp_OAMSP11	incomplete	Myoviridae/Pbunavirus	VPF-Class
7#Erwinia_sp_JH02	intact	Myoviridae	VPF-Class
7#Erwinia_rhapontici_WS3235_Ga0466830	intact	Siphoviridae	VPF-Class
7#Erwinia_rhapontici_CGMCC16978	intact	Myoviridae	VPF-Class
7#Erwinia_endophytica_A41C3	intact	Myoviridae	VPF-Class
7#Erwinia_dacicola_Oroville	intact	Podoviridae/P22virus	VPF-Class
6#Erwinia_sp_OLTSP20	incomplete	Myoviridae/Pbunavirus	VPF-Class
6#Erwinia_sp_OLSSP12	questionable	Siphoviridae/Lambdavirus	VPF-Class
6#Erwinia_sp_OLMTSP26	incomplete	Myoviridae/Pbunavirus	VPF-Class
6#Erwinia_sp_OLMDSP33	questionable	Siphoviridae/Lambdavirus	VPF-Class
6#Erwinia_sp_OLFS4	incomplete	Myoviridae/Pbunavirus	VPF-Class
6#Erwinia_sp_OLCASP19	intact	Siphoviridae	VPF-Class
6#Erwinia_sp_OAMSP11	questionable	Siphoviridae/Lambdavirus	VPF-Class
6#Erwinia_sp_JH02	intact	Myoviridae	VPF-Class
6#Erwinia_persicina_Cp2	intact	Myoviridae/P2virus	VPF-Class
6#Erwinia_persicina_CFBP8795_CFBP879501	incomplete	Siphoviridae	VPF-Class
6#Erwinia_persicina_CFBP1351100_0	intact	Myoviridae	VPF-Class
6#Erwinia_dacicola_Oroville	intact	Podoviridae/P22virus	VPF-Class
5#Erwinia_tracheiphila_BuffGH	intact	Podoviridae/P22virus	VPF-Class
5#Erwinia_sp_OLTSP20	questionable	Siphoviridae/Lambdavirus	VPF-Class
5#Erwinia_sp_OLMTSP26	questionable	Siphoviridae/Lambdavirus	VPF-Class
5#Erwinia_sp_OLFS4	questionable	Siphoviridae/Lambdavirus	VPF-Class
5#Erwinia_sp_OLCASP19	questionable	Siphoviridae/Lambdavirus	VPF-Class
5#Erwinia_rhapontici_MAFF_311154	intact	Myoviridae	VPF-Class
5#Erwinia_rhapontici_H1	intact	Myoviridae	VPF-Class
5#Erwinia_pyrifoliae_YKB12328	intact	Myoviridae/Muvirus	VPF-Class
5#Erwinia_pyrifoliae_Ep1_96	intact	Myoviridae/Muvirus	VPF-Class
5#Erwinia_pyrifoliae_DSM_12163	intact	Myoviridae/Muvirus	VPF-Class
5#Erwinia_persicina_CFBP8795_CFBP879501	intact	Siphoviridae	VPF-Class
5#Erwinia_persicina_B64	intact	Myoviridae/P2virus	VPF-Class
5#Erwinia_amylovora_Ea8_96	intact	Myoviridae	VPF-Class
5#Erwinia_amylovora_Ea6_96	intact	Myoviridae	VPF-Class
4#Erwinia_tracheiphila_MDCuke	questionable	Myoviridae/P2virus	VPF-Class
4#Erwinia_tracheiphila_BuffGH	intact	Myoviridae	VPF-Class
4#Erwinia_tracheiphila_BHKY	intact	Podoviridae/P22virus	VPF-Class
4#Erwinia_sp_QL_Z3	intact	Siphoviridae	VPF-Class
4#Erwinia_sp_OLSSP12	incomplete	Myoviridae/Pbunavirus	VPF-Class
4#Erwinia_pyrifoliae_YKB12328	incomplete	Myoviridae/Pbunavirus	VPF-Class
4#Erwinia_pyrifoliae_EpK1_15	questionable	Myoviridae/Pbunavirus	VPF-Class
4#Erwinia_pyrifoliae_Ep1_96	incomplete	Myoviridae/Pbunavirus	VPF-Class
4#Erwinia_pyrifoliae_DSM_12163	incomplete	Myoviridae/Pbunavirus	VPF-Class
4#Erwinia_persicina_NBRC_102418_DNA	intact	Siphoviridae/Lambdavirus	VPF-Class
4#Erwinia_persicina_DOAB1061_DOAB1061	intact	Siphoviridae/Lambdavirus	VPF-Class
4#Erwinia_persicina_CFBP8795_CFBP879501	intact	Myoviridae/P2virus	VPF-Class
4#Erwinia_gerundensis_Eg31_2	intact	Myoviridae/P2virus	VPF-Class
4#Erwinia_dacicola_IL	questionable	Podoviridae/P22virus	VPF-Class
4#Erwinia_billingiae_isolate_UBA5038	intact	Myoviridae/Muvirus	VPF-Class
4#Erwinia_amylovora_Ea6_96	questionable	Myoviridae/Muvirus	VPF-Class
4#Erwinia_amylovora_Ea160_4_51	questionable	Myoviridae/Pbunavirus	VPF-Class
4#Erwinia_amylovora_E2006P	intact	Myoviridae/Muvirus	VPF-Class
39#Erwinia_tracheiphila_MDCuke	questionable	Myoviridae	VPF-Class
39#Erwinia_tracheiphila_BuffGH	questionable	Myoviridae	VPF-Class
37#Erwinia_tracheiphila_BuffGH	intact	Myoviridae/Pbunavirus	VPF-Class
37#Erwinia_tracheiphila_BHKY	intact	Myoviridae	VPF-Class
36#Erwinia_tracheiphila_SCR3	intact	Myoviridae	VPF-Class
36#Erwinia_tracheiphila_MDCuke	intact	Myoviridae	VPF-Class
36#Erwinia_tracheiphila_BuffGH	intact	Myoviridae/Pbunavirus	VPF-Class
35#Erwinia_tracheiphila_BHKY	intact	Myoviridae/Pbunavirus	VPF-Class
34#Erwinia_tracheiphila_BHKY	intact	Myoviridae/Pbunavirus	VPF-Class
3#Erwinia_typographi_M043b	intact	Myoviridae/Muvirus	VPF-Class
3#Erwinia_sp_Leaf53	intact	Siphoviridae	VPF-Class
3#Erwinia_rhapontici_MAFF_311153	intact	Myoviridae	VPF-Class
3#Erwinia_rhapontici_H1	intact	Siphoviridae	VPF-Class
3#Erwinia_rhapontici_BIGb0435_Ga0304803	incomplete	Siphoviridae	VPF-Class
3#Erwinia_pyrifoliae_EpK1_15	intact	Myoviridae/Muvirus	VPF-Class
3#Erwinia_persicina_DOAB1061_DOAB1061	intact	Myoviridae/P2virus	VPF-Class
3#Erwinia_persicina_B64	incomplete	Myoviridae/P2virus	VPF-Class
3#Erwinia_dacicola_Oroville	incomplete	Myoviridae/Bcepmuvirus	VPF-Class
3#Erwinia_amylovora_Ea2_97	questionable	Myoviridae/Muvirus	VPF-Class
3#Erwinia_amylovora_Ea1_97	questionable	Myoviridae/Muvirus	VPF-Class
3#Erwinia_amylovora_Ea1_00	questionable	Myoviridae/Muvirus	VPF-Class
3#Erwinia_amylovora_Ea04_03	questionable	Myoviridae/Muvirus	VPF-Class
3#Erwinia_amylovora_E2006P	questionable	Myoviridae/Pbunavirus	VPF-Class
28#Erwinia_tracheiphila_SCR3	intact	Myoviridae/Muvirus	VPF-Class
28#Erwinia_tracheiphila_MDCuke	intact	Myoviridae/Muvirus	VPF-Class
27#Erwinia_tracheiphila_SCR3	intact	Siphoviridae	VPF-Class
27#Erwinia_tracheiphila_MDCuke	intact	Siphoviridae	VPF-Class
22#Erwinia_tracheiphila_SCR3	intact	Siphoviridae	VPF-Class
22#Erwinia_tracheiphila_MDCuke	intact	Siphoviridae	VPF-Class
2#Erwinia_sp_S38	intact	Siphoviridae/Lambdavirus	VPF-Class
2#Erwinia_sp_J780	incomplete	Siphoviridae	VPF-Class
2#Erwinia_sp_Ejp617	intact	Myoviridae/Pbunavirus	VPF-Class
2#Erwinia_sp_9145_FA91DRAFT	intact	Siphoviridae	VPF-Class
2#Erwinia_rhapontici_H1	intact	Myoviridae/Muvirus	VPF-Class
2#Erwinia_rhapontici_BY21311	intact	Myoviridae	VPF-Class
2#Erwinia_rhapontici_BIGb0435_Ga0304803	intact	Myoviridae	VPF-Class
2#Erwinia_persicina_NBRC_102418_DNA	intact	Myoviridae/P2virus	VPF-Class
2#Erwinia_persicina_B64	intact	Siphoviridae	VPF-Class
2#Erwinia_billingiae_TH88	intact	Siphoviridae/Lambdavirus	VPF-Class
2#Erwinia_aphidicola_JCM_21238	intact	Podoviridae/P22virus	VPF-Class
2#Erwinia_aphidicola_isolate_Bi13	intact	Siphoviridae	VPF-Class
2#Erwinia_amylovora_Ea8_96	incomplete	Myoviridae/Pbunavirus	VPF-Class
2#Erwinia_amylovora_Ea7_96	intact	Myoviridae/Muvirus	VPF-Class
2#Erwinia_amylovora_Ea3_97	questionable	Myoviridae/Muvirus	VPF-Class
2#Erwinia_amylovora_Ea1_98	questionable	Myoviridae/Muvirus	VPF-Class
2#Erwinia_amylovora_Ea1_95	intact	Myoviridae/Muvirus	VPF-Class
2#Erwinia_amylovora_Ea03_03	intact	Myoviridae/Muvirus	VPF-Class
2#Erwinia_amylovora_E2006P	intact	Myoviridae	VPF-Class
19#Erwinia_tracheiphila_PSU_1	intact	Myoviridae/Muvirus	VPF-Class
17#Erwinia_tracheiphila_SCR3	intact	Myoviridae	VPF-Class
17#Erwinia_tracheiphila_PSU_1	incomplete	Myoviridae	VPF-Class
17#Erwinia_tracheiphila_MDCuke	intact	Myoviridae	VPF-Class
16#Erwinia_tracheiphila_PSU_1	incomplete	Siphoviridae/Lambdavirus	VPF-Class
15#Erwinia_tracheiphila_PSU_1	incomplete	Myoviridae/Pbunavirus	VPF-Class
13#Erwinia_tracheiphila_MDCuke	intact	Siphoviridae	VPF-Class
13#Erwinia_tracheiphila_BuffGH	questionable	Podoviridae/P22virus	VPF-Class
12#Erwinia_tracheiphila_BuffGH	intact	Siphoviridae	VPF-Class
12#Erwinia_tracheiphila_BHKY	questionable	Podoviridae/P22virus	VPF-Class
12#Erwinia_dacicola_Oroville	questionable	Podoviridae/P22virus	VPF-Class
11#Erwinia_tracheiphila_BHKY	intact	Siphoviridae	VPF-Class
10#Erwinia_tracheiphila_SCR3	intact	Podoviridae/P22virus	VPF-Class
10#Erwinia_tracheiphila_MDCuke	intact	Podoviridae/P22virus	VPF-Class
1#Erwinia_typographi_M043b	intact	Siphoviridae	VPF-Class
1#Erwinia_tracheiphila_BuffGH	questionable	Myoviridae/Muvirus	VPF-Class
1#Erwinia_tracheiphila_BHKY	incomplete	Myoviridae/Muvirus	VPF-Class
1#Erwinia_sp_S38	intact	Siphoviridae	VPF-Class
1#Erwinia_sp_Leaf53	intact	Siphoviridae	VPF-Class
1#Erwinia_sp_JUb26_Ga0304838	incomplete	Siphoviridae/Lambdavirus	VPF-Class
1#Erwinia_sp_ErVv1	incomplete	Myoviridae/Hp1virus	VPF-Class
1#Erwinia_sp_E602	intact	Siphoviridae	VPF-Class
1#Erwinia_sp_9145_FA91DRAFT	intact	Myoviridae/P2virus	VPF-Class
1#Erwinia_sp_198	incomplete	Myoviridae/P2virus	VPF-Class
1#Erwinia_rhapontici_WS3235_Ga0466830	intact	Myoviridae	VPF-Class
1#Erwinia_rhapontici_H1	intact	Siphoviridae/Lambdavirus	VPF-Class
1#Erwinia_rhapontici_CGMCC16978	intact	Siphoviridae	VPF-Class
1#Erwinia_phyllosphaerae_CMYE1	questionable	Podoviridae	VPF-Class
1#Erwinia_persicina_CFBP8803_CFBP880301	intact	Myoviridae/P2virus	VPF-Class
1#Erwinia_persicina_CFBP8797_CFBP879701	intact	Myoviridae/P2virus	VPF-Class
1#Erwinia_persicina_CFBP8767_CFBP8767001	intact	Myoviridae	VPF-Class
1#Erwinia_persicina_CFBP13732_CFBP13732001	intact	Myoviridae	VPF-Class
1#Erwinia_persicina_CFBP1351100_0	intact	Siphoviridae/Lambdavirus	VPF-Class
1#Erwinia_gerundensis_Eg31_2	intact	Siphoviridae	VPF-Class
1#Erwinia_billingiae_PBb	intact	Myoviridae/Muvirus	VPF-Class
1#Erwinia_billingiae_isolate_UBA5038	intact	Siphoviridae	VPF-Class
1#Erwinia_aphidicola_JCM_21238	intact	Myoviridae	VPF-Class
1#Erwinia_aphidicola_isolate_Bi13	intact	Myoviridae	VPF-Class
1#Erwinia_amylovora_Ea8_96	questionable	Myoviridae/Muvirus	VPF-Class
1#Erwinia_amylovora_Ea644	questionable	Myoviridae/Muvirus	VPF-Class
1#Erwinia_amylovora_Ea6_96	incomplete	Myoviridae/Pbunavirus	VPF-Class
1#Erwinia_amylovora_Ea4_96	questionable	Myoviridae/Muvirus	VPF-Class
1#Erwinia_amylovora_Ea123_5_51	intact	Myoviridae	VPF-Class
1#Erwinia_amylovora_Ea04_03	intact	Myoviridae	VPF-Class
1#Erwinia_amylovora_Ea02_03	intact	Myoviridae/Muvirus	VPF-Class
1#Erwinia_amylovora_Ea01_03	questionable	Myoviridae/Muvirus	VPF-Class
9#Erwinia_tracheiphila_BHKY	intact	Myoviridae/Muvirus	VPF-Class/vConTACT2
9#Erwinia_sp_JH02	intact	Myoviridae/P2virus	VPF-Class/vConTACT2
9#Erwinia_dacicola_Oroville	incomplete	Myoviridae/Hp1virus	VPF-Class/vConTACT2
9#Erwinia_dacicola_IL	questionable	Myoviridae/Hp1virus	VPF-Class/vConTACT2
8#Erwinia_tracheiphila_SCR3	intact	Myoviridae/Muvirus	VPF-Class/vConTACT2
8#Erwinia_tracheiphila_MDCuke	intact	Myoviridae/Muvirus	VPF-Class/vConTACT2
6#Erwinia_sp_Leaf53	intact	Siphoviridae	VPF-Class/vConTACT2
6#Erwinia_rhapontici_CGMCC16978	incomplete	Myoviridae/P2virus	VPF-Class/vConTACT2
6#Erwinia_phyllosphaerae_CMYE1	questionable	Myoviridae/Hp1virus	VPF-Class/vConTACT2
5#Erwinia_tracheiphila_SCR3	intact	Myoviridae/P2virus	VPF-Class/vConTACT2
5#Erwinia_tracheiphila_MDCuke	intact	Myoviridae/P2virus	VPF-Class/vConTACT2
5#Erwinia_toletana_DAPP_PG_735	questionable	Myoviridae	VPF-Class/vConTACT2
5#Erwinia_sp_S38	intact	Myoviridae/P2virus	VPF-Class/vConTACT2
5#Erwinia_sp_ErVv1	incomplete	Myoviridae	VPF-Class/vConTACT2
5#Erwinia_sp_198	incomplete	Myoviridae	VPF-Class/vConTACT2
5#Erwinia_rhapontici_BIGb0435_Ga0304803	intact	Myoviridae/P2virus	VPF-Class/vConTACT2
5#Erwinia_psidii_IBSBF_435	intact	Myoviridae/Hp1virus	VPF-Class/vConTACT2
5#Erwinia_phyllosphaerae_CMYE1	incomplete	Myoviridae	VPF-Class/vConTACT2
5#Erwinia_persicina_DOAB1061_DOAB1061	incomplete	Myoviridae/Hp1virus	VPF-Class/vConTACT2
5#Erwinia_dacicola_IL	incomplete	Myoviridae/Bcepmuvirus	VPF-Class/vConTACT2
41#Erwinia_tracheiphila_SCR3	questionable	Myoviridae	VPF-Class/vConTACT2
4#Erwinia_rhapontici_WS3235_Ga0466830	intact	Myoviridae/P2virus	VPF-Class/vConTACT2
4#Erwinia_rhapontici_H1	intact	Myoviridae/P2virus	VPF-Class/vConTACT2
4#Erwinia_psidii_IBSBF_435	intact	Myoviridae/P2virus	VPF-Class/vConTACT2
4#Erwinia_persicina_Cp2	intact	Myoviridae/P2virus	VPF-Class/vConTACT2
4#Erwinia_dacicola_Oroville	questionable	Podoviridae/Epsilon15virus	VPF-Class/vConTACT2
4#Erwinia_billingiae_TH88	incomplete	Myoviridae/P2virus	VPF-Class/vConTACT2
39#Erwinia_tracheiphila_SCR3	intact	Myoviridae/Muvirus	VPF-Class/vConTACT2
38#Erwinia_tracheiphila_MDCuke	intact	Myoviridae/Muvirus	VPF-Class/vConTACT2
31#Erwinia_tracheiphila_SCR3	intact	Myoviridae/Muvirus	VPF-Class/vConTACT2
30#Erwinia_tracheiphila_MDCuke	intact	Myoviridae/Muvirus	VPF-Class/vConTACT2
3#Erwinia_sp_JH02	questionable	Myoviridae/Hp1virus	VPF-Class/vConTACT2
3#Erwinia_sp_E602	questionable	Myoviridae/P2virus	VPF-Class/vConTACT2
3#Erwinia_rhapontici_WS3235_Ga0466830	intact	Myoviridae	VPF-Class/vConTACT2
3#Erwinia_rhapontici_MAFF_311154	intact	Myoviridae	VPF-Class/vConTACT2
3#Erwinia_rhapontici_BY21311	intact	Myoviridae/P2virus	VPF-Class/vConTACT2
3#Erwinia_piriflorinigrans_CFBP_5888	intact	Myoviridae/P2virus	VPF-Class/vConTACT2
3#Erwinia_billingiae_PBb	incomplete	Myoviridae/P2virus	VPF-Class/vConTACT2
3#Erwinia_billingiae_isolate_UBA5038	intact	Myoviridae/P2virus	VPF-Class/vConTACT2
3#Erwinia_billingiae_Eb661	questionable	Siphoviridae/Lambdavirus OR myoviridae/rahariannevirus	VPF-Class/vConTACT2
3#Erwinia_amylovora_Ea4_96	intact	Myoviridae/P2virus	VPF-Class/vConTACT2
25#Erwinia_tracheiphila_SCR3	intact	Myoviridae/Hp1virus	VPF-Class/vConTACT2
25#Erwinia_tracheiphila_MDCuke	intact	Myoviridae/Hp1virus	VPF-Class/vConTACT2
22#Erwinia_tracheiphila_PSU_1	incomplete	Myoviridae/P2virus	VPF-Class/vConTACT2
22#Erwinia_tracheiphila_BuffGH	intact	Myoviridae/P2virus	VPF-Class/vConTACT2
21#Erwinia_tracheiphila_BuffGH	intact	Myoviridae/Muvirus	VPF-Class/vConTACT2
20#Erwinia_tracheiphila_BHKY	intact	Myoviridae/P2virus	VPF-Class/vConTACT2
2#Erwinia_typographi_M043b	incomplete	Myoviridae/P2virus	VPF-Class/vConTACT2
2#Erwinia_toletana_WS4403_Ga0466831	questionable	Myoviridae	VPF-Class/vConTACT2
2#Erwinia_toletana_DAPP_PG_735	intact	Myoviridae/P2virus	VPF-Class/vConTACT2
2#Erwinia_sp_Leaf53	intact	Myoviridae/P2virus	VPF-Class/vConTACT2
2#Erwinia_gerundensis_EM595	intact	Myoviridae/P2virus	VPF-Class/vConTACT2
2#Erwinia_sp_E602	intact	Myoviridae	VPF-Class/vConTACT2
2#Erwinia_sp_198	intact	Myoviridae/P2virus	VPF-Class/vConTACT2
2#Erwinia_rhapontici_CGMCC16978	intact	Myoviridae	VPF-Class/vConTACT2
2#Erwinia_psidii_IBSBF_435	intact	Myoviridae/P2virus	VPF-Class/vConTACT2
2#Erwinia_phyllosphaerae_CMYE1	incomplete	Siphoviridae/Lambdavirus	VPF-Class/vConTACT2
2#Erwinia_mallotivora_BT_MARDI	incomplete	Myoviridae/P2virus	VPF-Class/vConTACT2
2#Erwinia_dacicola_IL	questionable	Podoviridae/Epsilon15virus	VPF-Class/vConTACT2
2#Erwinia_billingiae_Eb661	questionable	Myoviridae/P2virus	VPF-Class/vConTACT2
2#Erwinia_amylovora_Ea2_97	intact	Myoviridae/P2virus	VPF-Class/vConTACT2
19#Erwinia_tracheiphila_BHKY	intact	Myoviridae/Muvirus	VPF-Class/vConTACT2
17#Erwinia_tracheiphila_BuffGH	intact	Myoviridae/P2virus	VPF-Class/vConTACT2
16#Erwinia_tracheiphila_BuffGH	intact	Myoviridae/P2virus	VPF-Class/vConTACT2
12#Erwinia_tracheiphila_SCR3	intact	Myoviridae/Bcepmuvirus	VPF-Class/vConTACT2
11#Erwinia_tracheiphila_PSU_1	intact	Myoviridae/Muvirus	VPF-Class/vConTACT2
11#Erwinia_tracheiphila_MDCuke	intact	Myoviridae/Bcepmuvirus	VPF-Class/vConTACT2
11#Erwinia_tracheiphila_BuffGH	intact	Myoviridae/Bcepmuvirus	VPF-Class/vConTACT2
11#Erwinia_dacicola_Oroville	questionable	Myoviridae/Hp1virus	VPF-Class/vConTACT2
11#Erwinia_dacicola_IL	incomplete	Myoviridae/Hp1virus	VPF-Class/vConTACT2
10#Erwinia_tracheiphila_PSU_1	questionable	Myoviridae/Bcepmuvirus	VPF-Class/vConTACT2
10#Erwinia_tracheiphila_BuffGH	intact	Myoviridae/Muvirus	VPF-Class/vConTACT2
10#Erwinia_tracheiphila_BHKY	intact	Myoviridae/Bcepmuvirus	VPF-Class/vConTACT2
10#Erwinia_persicina_CFBP8795_CFBP879501	intact	Myoviridae/P2virus	VPF-Class/vConTACT2
10#Erwinia_dacicola_Oroville	intact	Myoviridae/P2virus	VPF-Class/vConTACT2
1#Erwinia_tracheiphila_SCR3	intact	Myoviridae/P2virus	VPF-Class/vConTACT2
1#Erwinia_tracheiphila_MDCuke	intact	Myoviridae/P2virus	VPF-Class/vConTACT2
1#Erwinia_toletana_WS4403_Ga0466831	intact	Myoviridae/P2virus	VPF-Class/vConTACT2
1#Erwinia_tasmaniensis_ET1_99	incomplete	Myoviridae/P2virus	VPF-Class/vConTACT2
1#Erwinia_rhapontici_BIGb0435_Ga0304803	intact	Myoviridae	VPF-Class/vConTACT2
1#Erwinia_persicina_DOAB1061_DOAB1061	intact	Myoviridae/P2virus	VPF-Class/vConTACT2
1#Erwinia_persicina_CFBP8795_CFBP879501	incomplete	Myoviridae/Bcepmuvirus	VPF-Class/vConTACT2
1#Erwinia_billingiae_Eb661	intact	Myoviridae/P2virus	VPF-Class/vConTACT2
1#Erwinia_amylovora_Ea3_97	intact	Myoviridae/P2virus	VPF-Class/vConTACT2
