# Supplementary material for: Genomic Analysis Unveils the Pervasiveness and Diversity of Prophages Infecting Erwinia Species
Source: Pathogens. 2022 Dec 27;12(1):44. doi: 10.3390/pathogens12010044 (PMC9866893; doi:10.3390/pathogens12010044)
Supplement: Supplementary file 1 [file pathogens-12-00044-s001.zip › Table_S5 - tabela_suplementar_saida_vcontact2_intactos_nao_classificados.xlsx]

## Sheet: Table_Sx - tabela_suplementar_s
Table S5. The genome_by_genome_overview.csv output file from vConTACT2 showing only the 46 unclassified intact Erwinia prophage sequences using a combination of vConTACT2 and VPF-class.
	Genome	Order	Family	Genus	VC	VC Status	Size	VC Subcluster	VC Subcluster Size	Quality	Adj P-value	Topology Confidence Score	Genera in VC	Families in VC	Orders in VC	Genus Confidence Score
148	1#Erwinia_persicina_Cp2	Unassigned	Unassigned	Unassigned	49_0	Clustered	12	VC_49_0	12	449	1.0	449	1	1	1	1.0
208	14#Erwinia_tracheiphila_BHKY	Unassigned	Unassigned	Unassigned	68_0	Clustered	5	VC_68_0	5	0.5396	0.99999992	0.5396	1	1	1	1.0
211	14#Erwinia_tracheiphila_SCR3	Unassigned	Unassigned	Unassigned	38_0	Clustered	3	VC_38_0	3	0.3212	0.9982427	0.3207	1	1	1	1.0
212	15#Erwinia_tracheiphila_BHKY	Unassigned	Unassigned	Unassigned	110_0	Clustered	4	VC_110_0	4	0.4912	0.99781366	0.4901	1	1	1	1.0
213	15#Erwinia_tracheiphila_BuffGH	Unassigned	Unassigned	Unassigned	68_0	Clustered	5	VC_68_0	5	0.5396	0.99999992	0.5396	1	1	1	1.0
214	15#Erwinia_tracheiphila_MDCuke	Unassigned	Unassigned	Unassigned	92_0	Clustered	4	VC_92_0	4	0.2584	0.99997282	0.2584	1	1	1	1.0
215	15#Erwinia_tracheiphila_SCR3	Unassigned	Unassigned	Unassigned	92_0	Clustered	4	VC_92_0	4	0.2584	0.99997282	0.2584	1	1	1	1.0
220	17#Erwinia_tracheiphila_BHKY	Unassigned	Unassigned	Unassigned	15_0	Clustered	2	VC_15_0	2	0.0942	0.95522404	0.09	1	1	1	1.0
225	18#Erwinia_tracheiphila_MDCuke	Unassigned	Unassigned	Unassigned	111_0	Clustered	2	VC_111_0	2	0.5421	0.94585423	0.5127	1	1	1	1.0
227	18#Erwinia_tracheiphila_SCR3	Unassigned	Unassigned	Unassigned	111_0	Clustered	2	VC_111_0	2	0.5421	0.94585423	0.5127	1	1	1	1.0
229	19#Erwinia_tracheiphila_BuffGH	Unassigned	Unassigned	Unassigned	15_0	Clustered	2	VC_15_0	2	0.0942	0.95522404	0.09	1	1	1	1.0
370	2#Erwinia_oleae_DAPP_PG531	Unassigned	Unassigned	Unassigned	73_0	Clustered	4	VC_73_0	4	1.0	1.0	1.0	1	1	1	1.0
423	21#Erwinia_tracheiphila_BHKY	Unassigned	Unassigned	Unassigned	89_0	Clustered	5	VC_89_0	5	0.6638	0.99999937	0.6638	1	1	1	1.0
427	22#Erwinia_tracheiphila_BHKY	Unassigned	Unassigned	Unassigned	107_0	Clustered	2	VC_107_0	2	0.1954	0.95375357	0.1863	1	1	1	1.0
432	23#Erwinia_tracheiphila_BHKY	Unassigned	Unassigned	Unassigned	103_0	Clustered	2	VC_103_0	2	496	0.94489191	0.4687	1	1	1	1.0
433	23#Erwinia_tracheiphila_BuffGH	Unassigned	Unassigned	Unassigned	89_0	Clustered	5	VC_89_0	5	0.6638	0.99999937	0.6638	1	1	1	1.0
436	24#Erwinia_tracheiphila_BuffGH	Unassigned	Unassigned	Unassigned	107_0	Clustered	2	VC_107_0	2	0.1954	0.95375357	0.1863	1	1	1	1.0
439	25#Erwinia_tracheiphila_BHKY	Unassigned	Unassigned	Unassigned	104_0	Clustered	4	VC_104_0	4	0.5047	0.99997623	0.5047	1	1	1	1.0
443	26#Erwinia_tracheiphila_BHKY	Unassigned	Unassigned	Unassigned	92_0	Clustered	4	VC_92_0	4	0.2584	0.99997282	0.2584	1	1	1	1.0
446	27#Erwinia_tracheiphila_BHKY	Unassigned	Unassigned	Unassigned	38_0	Clustered	3	VC_38_0	3	0.3212	0.9982427	0.3207	1	1	1	1.0
447	27#Erwinia_tracheiphila_BuffGH	Unassigned	Unassigned	Unassigned	104_0	Clustered	4	VC_104_0	4	0.5047	0.99997623	0.5047	1	1	1	1.0
451	28#Erwinia_tracheiphila_BuffGH	Unassigned	Unassigned	Unassigned	92_0	Clustered	4	VC_92_0	4	0.2584	0.99997282	0.2584	1	1	1	1.0
453	29#Erwinia_tracheiphila_BuffGH	Unassigned	Unassigned	Unassigned	38_0	Clustered	3	VC_38_0	3	0.3212	0.9982427	0.3207	1	1	1	1.0
550	3#Erwinia_rhapontici_CGMCC16978	Unassigned	Unassigned	Unassigned	17_0	Clustered	77	VC_17_0	77	0.9003	1.0	0.9003	1	1	1	1.0
603	39#Erwinia_tracheiphila_BHKY	Unassigned	Unassigned	Unassigned	125_0	Clustered	4	VC_125_0	4	0.9782	0.99318376	0.9716	1	1	1	1.0
634	4#Erwinia_rhapontici_CGMCC16978	Unassigned	Unassigned	Unassigned	44_0	Clustered	2	VC_44_0	2	0.3458	0.95342681	0.3297	1	1	1	1.0
657	40#Erwinia_tracheiphila_BuffGH	Unassigned	Unassigned	Unassigned	125_0	Clustered	4	VC_125_0	4	0.9782	0.99318376	0.9716	1	1	1	1.0
720	6#Erwinia_rhapontici_WS3235_Ga0466830	Unassigned	Unassigned	Unassigned	44_0	Clustered	2	VC_44_0	2	0.3458	0.95342681	0.3297	1	1	1	1.0
739	7#Erwinia_pyrifoliae_DSM_12163	Unassigned	Unassigned	Unassigned	114_0	Clustered	2	VC_114_0	2	0.6539	0.92451884	0.6045	1	1	1	1.0
740	7#Erwinia_pyrifoliae_Ep1_96	Unassigned	Unassigned	Unassigned	114_0	Clustered	2	VC_114_0	2	0.6539	0.92451884	0.6045	1	1	1	1.0
753	7#Erwinia_tracheiphila_BHKY	Unassigned	Unassigned	Unassigned	90_0	Clustered	2	VC_90_0	2	0.2316	0.95325006	0.2208	1	1	1	1.0
770	8#Erwinia_tracheiphila_BuffGH	Unassigned	Unassigned	Unassigned	90_0	Clustered	2	VC_90_0	2	0.2316	0.95325006	0.2208	1	1	1	1.0
218	1#Erwinia_tracheiphila_PSU_1	Unassigned	Unassigned	Unassigned		Overlap (VC_86/VC_88)
462	2#Erwinia_pyrifoliae_EpK1_15	Unassigned	Unassigned	Unassigned		Outlier
521	24#Erwinia_tracheiphila_BHKY	Unassigned	Unassigned	Unassigned		Overlap (VC_86/VC_88)
530	26#Erwinia_tracheiphila_BuffGH	Unassigned	Unassigned	Unassigned		Overlap (VC_86/VC_88)
676	3#Erwinia_sp_S43	Unassigned	Unassigned	Unassigned		Overlap (VC_14/VC_27)
688	30#Erwinia_tracheiphila_BHKY	Unassigned	Unassigned	Unassigned		Overlap (VC_38/VC_94)
692	31#Erwinia_tracheiphila_BHKY	Unassigned	Unassigned	Unassigned		Overlap (VC_38/VC_94)
697	32#Erwinia_tracheiphila_BuffGH	Unassigned	Unassigned	Unassigned		Overlap (VC_38/VC_94)
701	33#Erwinia_tracheiphila_BuffGH	Unassigned	Unassigned	Unassigned		Overlap (VC_38/VC_94)
742	4#Erwinia_billingiae_Eb661	Unassigned	Unassigned	Unassigned		Overlap (VC_36/VC_37)
806	5#Erwinia_billingiae_PBb	Unassigned	Unassigned	Unassigned		Overlap (VC_36/VC_37)
837	5#Erwinia_sp_QL_Z3	Unassigned	Unassigned	Unassigned		Overlap (VC_36/VC_37)
882	6#Erwinia_tracheiphila_MDCuke	Unassigned	Unassigned	Unassigned		Overlap (VC_31/VC_107)
884	6#Erwinia_tracheiphila_SCR3	Unassigned	Unassigned	Unassigned		Overlap (VC_31/VC_107)
