# Supplementary material for: Genomic Analysis Unveils the Pervasiveness and Diversity of Prophages Infecting Erwinia Species
Source: Pathogens. 2022 Dec 27;12(1):44. doi: 10.3390/pathogens12010044 (PMC9866893; doi:10.3390/pathogens12010044)
Supplement: Supplementary file 1 [file pathogens-12-00044-s001.zip › Table_S6 - suplementar_viridic_clusters.xlsx]

## Sheet: tmp
Table S6. The clusters.csv output file from VIRIDIC including the 939 Erwinia prophage sequences and known Erwinia phage sequences obtained in GenBank. Only database sequences showing at least 70% of intergenomic similarity were included. The prophage completeness provided by PHASTER was included.
Prophage ID	species_cluster	genus_cluster	prophage completeness
1#Erwinia_dacicola_IL	1	1	incomplete
2#Erwinia_amylovora_1482	2	2	incomplete
1#Erwinia_amylovora_Ea12	2	2	incomplete
1#Erwinia_amylovora_1617	2	2	incomplete
1#Erwinia_amylovora_1478_2	2	2	incomplete
1#Erwinia_amylovora_1611_BCEa29	2	2	incomplete
1#Erwinia_amylovora_3515_1	2	2	incomplete
3#Erwinia_amylovora_1581	2	2	incomplete
2#Erwinia_amylovora_7_3	2	2	incomplete
2#Erwinia_amylovora_1_2	2	2	incomplete
2#Erwinia_amylovora_1598	2	2	incomplete
2#Erwinia_amylovora_1619	2	2	incomplete
2#Erwinia_amylovora_Ea160_3_51	2	2	incomplete
1#Erwinia_amylovora_CFBP_2585	2	2	incomplete
2#Erwinia_amylovora_CFBP_1232	2	2	incomplete
2#Erwinia_amylovora_CFBP1430	2	2	incomplete
1#Erwinia_amylovora_UPN527	2	2	incomplete
1#Erwinia_amylovora_01SFR_BO	2	2	incomplete
1#Erwinia_amylovora_ACW56400	2	2	incomplete
2#Erwinia_amylovora_ATCC_15580	2	2	incomplete
4#Erwinia_amylovora_MASHBO	2	2	incomplete
3#Erwinia_amylovora_LA637	2	2	incomplete
3#Erwinia_amylovora_LA636	2	2	incomplete
3#Erwinia_amylovora_LA635	2	2	incomplete
2#Erwinia_amylovora_TS3128	2	2	incomplete
2#Erwinia_amylovora_HKN06P1	2	2	incomplete
2#Erwinia_amylovora_Ea356	2	2	incomplete
2#Erwinia_amylovora_17_2187	2	2	incomplete
2#Erwinia_amylovora_Ea1_79Sm	2	2	incomplete
1#Erwinia_amylovora_32_10	3	2	incomplete
1#Erwinia_amylovora_11_7	3	2	incomplete
3#Erwinia_amylovora_33_1	3	2	incomplete
2#Erwinia_amylovora_OR1	3	2	incomplete
1#Erwinia_amylovora_LA472	3	2	incomplete
1#Erwinia_amylovora_20060013	3	2	incomplete
1#Erwinia_amylovora_BCEa23A	3	2	incomplete
1#Erwinia_amylovora_1602	3	2	incomplete
2#Erwinia_amylovora_OR6	3	2	incomplete
2#Erwinia_amylovora_LA092	3	2	incomplete
2#Erwinia_amylovora_1486	3	2	incomplete
1#Erwinia_amylovora_1609	3	2	incomplete
1#Erwinia_amylovora_1280	3	2	incomplete
1#Erwinia_amylovora_1480_3	3	2	incomplete
1#Erwinia_amylovora_1279	4	3	incomplete
2#Erwinia_amylovora_1612	5	4	incomplete
2#Erwinia_amylovora_1581	5	4	incomplete
1#Erwinia_amylovora_1619	5	4	incomplete
1#Erwinia_amylovora_1482	5	4	incomplete
1#Erwinia_amylovora_1598	5	4	incomplete
4#Erwinia_amylovora_33_1	5	4	incomplete
3#Erwinia_amylovora_OR6	5	4	incomplete
3#Erwinia_amylovora_OR1	5	4	incomplete
3#Erwinia_amylovora_LA092	5	4	incomplete
3#Erwinia_amylovora_1486	5	4	incomplete
2#Erwinia_amylovora_LA472	5	4	incomplete
2#Erwinia_amylovora_BCEa23A	5	4	incomplete
2#Erwinia_amylovora_20060013	5	4	incomplete
2#Erwinia_amylovora_1609	5	4	incomplete
2#Erwinia_amylovora_1280	5	4	incomplete
2#Erwinia_amylovora_1602	5	4	incomplete
2#Erwinia_amylovora_11_7	5	4	incomplete
2#Erwinia_amylovora_32_10	5	4	incomplete
1#Erwinia_amylovora_Ea160_3_51	5	4	incomplete
2#Erwinia_amylovora_MAGFLF_2	5	4	incomplete
2#Erwinia_amylovora_Ea433	5	4	incomplete
3#Erwinia_amylovora_CTST01_1	5	4	incomplete
2#Erwinia_amylovora_RISTBO01_2	5	4	incomplete
2#Erwinia_amylovora_VTDMSF02	5	4	incomplete
2#Erwinia_amylovora_CTBT1_1	5	4	incomplete
3#Erwinia_amylovora_NHWL02_2	5	4	incomplete
3#Erwinia_amylovora_MLI200_18	5	4	incomplete
3#Erwinia_amylovora_EaG5	5	4	incomplete
3#Erwinia_amylovora_CTMF03_1	5	4	incomplete
2#Erwinia_amylovora_MLI181_18	5	4	incomplete
2#Erwinia_amylovora_CTBT3_1	5	4	incomplete
2#Erwinia_amylovora_MANB02_1	5	4	incomplete
2#Erwinia_amylovora_46_4_2	5	4	incomplete
3#Erwinia_amylovora_Ea3a_H1_II	5	4	incomplete
3#Erwinia_amylovora_NHSB01_1	5	4	incomplete
3#Erwinia_amylovora_WSDA87_73	5	4	incomplete
3#Erwinia_amylovora_VTBL01_1	5	4	incomplete
3#Erwinia_amylovora_Ea321	5	4	incomplete
3#Erwinia_amylovora_EA110	5	4	incomplete
2#Erwinia_amylovora_TS3238	5	4	incomplete
2#Erwinia_amylovora_Fb_97b	5	4	incomplete
2#Erwinia_amylovora_FB_86	5	4	incomplete
2#Erwinia_amylovora_FB_307	5	4	incomplete
2#Erwinia_amylovora_FB_207	5	4	incomplete
2#Erwinia_amylovora_FB_20	5	4	incomplete
2#Erwinia_amylovora_EaB_110	5	4	incomplete
2#Erwinia_amylovora_Ea6_97	5	4	incomplete
2#Erwinia_amylovora_Ea5_97	5	4	incomplete
2#Erwinia_amylovora_Ea4_97	5	4	incomplete
2#Erwinia_amylovora_Ea440	5	4	incomplete
2#Erwinia_amylovora_Ea435	5	4	incomplete
2#Erwinia_amylovora_Ea169	5	4	incomplete
2#Erwinia_amylovora_Ea1189	5	4	incomplete
2#Erwinia_amylovora_CFBP_1995	5	4	incomplete
2#Erwinia_amylovora_245_07	5	4	incomplete
2#Erwinia_amylovora_ATCC_49946	5	4	incomplete
2#Erwinia_amylovora_MLI90_17	5	4	incomplete
2#Erwinia_amylovora_Ea116_5_29	5	4	incomplete
2#Erwinia_amylovora_EaD_7	5	4	incomplete
3#Erwinia_amylovora_UT5P4	5	4	incomplete
2#Erwinia_amylovora_Ea315_1	5	4	incomplete
2#Erwinia_amylovora_1477_1	5	4	incomplete
2#Erwinia_amylovora_1680	5	4	incomplete
2#Erwinia_amylovora_E2005A	5	4	incomplete
2#Erwinia_amylovora_Ea6_4	5	4	incomplete
2#Erwinia_amylovora_E_2	5	4	incomplete
3#Erwinia_amylovora_241_07	5	4	incomplete
1#Erwinia_amylovora_39_M1_II	5	4	incomplete
1#Erwinia_amylovora_IVIA2303	5	4	incomplete
1#Erwinia_amylovora_Ea356	5	4	incomplete
1#Erwinia_amylovora_214_07	5	4	incomplete
1#Erwinia_amylovora_2570	5	4	incomplete
1#Erwinia_amylovora_20070270	5	4	incomplete
1#Erwinia_amylovora_1400_1	5	4	incomplete
1#Erwinia_amylovora_20070245	5	4	incomplete
2#Erwinia_amylovora_LA637	5	4	incomplete
2#Erwinia_amylovora_LA636	5	4	incomplete
2#Erwinia_amylovora_LA635	5	4	incomplete
1#Erwinia_amylovora_MLI217_18	5	4	incomplete
1#Erwinia_amylovora_Ea92_1_2	5	4	incomplete
1#Erwinia_amylovora_Ea92_1_1	5	4	incomplete
1#Erwinia_amylovora_Ea650	5	4	incomplete
1#Erwinia_amylovora_Ea464	5	4	incomplete
1#Erwinia_amylovora_Ea367	5	4	incomplete
1#Erwinia_amylovora_CFBP_1232	5	4	incomplete
1#Erwinia_amylovora_CFBP_7130	5	4	incomplete
1#Erwinia_amylovora_39_I_II	5	4	incomplete
1#Erwinia_amylovora_Ea17_1_1	5	4	incomplete
3#Erwinia_amylovora_MASHBO	5	4	incomplete
1#Erwinia_amylovora_Ea266	5	4	incomplete
2#Erwinia_amylovora_1668	5	4	incomplete
1#Erwinia_amylovora_Ea29_7	5	4	incomplete
1#Erwinia_amylovora_O_RG_21	5	4	incomplete
2#Erwinia_amylovora_Ea160_4_51	5	4	incomplete
1#Erwinia_amylovora_Ea1_00	5	4	incomplete
2#Erwinia_amylovora_EaIF	5	4	incomplete
2#Erwinia_amylovora_CA3R	5	4	incomplete
3#Erwinia_amylovora_3446_1	5	4	incomplete
1#Erwinia_amylovora_1400_2	6	5	incomplete
1#Erwinia_amylovora_CFBP_2313	6	5	incomplete
2#Erwinia_amylovora_MASHBO	7	3	incomplete
3#Erwinia_amylovora_46_4_2	7	3	incomplete
1#Erwinia_amylovora_EaG5	7	3	incomplete
3#Erwinia_amylovora_MANB02_1	7	3	incomplete
3#Erwinia_amylovora_MLI181_18	7	3	incomplete
2#Erwinia_amylovora_01SFR_BO	7	3	incomplete
1#Erwinia_amylovora_CFBP1430	7	3	incomplete
2#Erwinia_amylovora_UPN527	7	3	incomplete
3#Erwinia_amylovora_MLI90_17	7	3	incomplete
3#Erwinia_amylovora_Ea356	7	3	incomplete
3#Erwinia_amylovora_E_2	7	3	incomplete
3#Erwinia_amylovora_CFBP_1232	7	3	incomplete
3#Erwinia_amylovora_ATCC_49946	7	3	incomplete
3#Erwinia_amylovora_20070245	7	3	incomplete
3#Erwinia_amylovora_1400_1	7	3	incomplete
2#Erwinia_amylovora_ACW56400	7	3	incomplete
1#Erwinia_amylovora_UT5P4	7	3	incomplete
1#Erwinia_amylovora_LA092	7	3	incomplete
1#Erwinia_amylovora_HKN06P1	7	3	incomplete
1#Erwinia_amylovora_Ea1_79Sm	7	3	incomplete
1#Erwinia_amylovora_ATCC_15580	7	3	incomplete
1#Erwinia_amylovora_1_2	7	3	incomplete
1#Erwinia_amylovora_1486	7	3	incomplete
1#Erwinia_amylovora_17_2187	7	3	incomplete
1#Erwinia_amylovora_LA637	7	3	incomplete
1#Erwinia_amylovora_LA635	7	3	incomplete
1#Erwinia_amylovora_LA636	7	3	incomplete
3#Erwinia_amylovora_Ea266	7	3	incomplete
1#Erwinia_amylovora_OR1	7	3	incomplete
3#Erwinia_amylovora_1619	7	3	incomplete
1#Erwinia_amylovora_OR6	7	3	incomplete
1#Erwinia_amylovora_TS3128	7	3	incomplete
1#Erwinia_amylovora_1686	7	3	incomplete
1#Erwinia_amylovora_241_07	7	3	incomplete
3#Erwinia_amylovora_Ea116_5_29	7	3	incomplete
3#Erwinia_amylovora_20070270	7	3	incomplete
3#Erwinia_amylovora_TS3238	7	3	incomplete
3#Erwinia_amylovora_MLI217_18	7	3	incomplete
3#Erwinia_amylovora_FB_86	7	3	incomplete
3#Erwinia_amylovora_FB_307	7	3	incomplete
3#Erwinia_amylovora_FB_207	7	3	incomplete
3#Erwinia_amylovora_FB_20	7	3	incomplete
3#Erwinia_amylovora_Ea435	7	3	incomplete
3#Erwinia_amylovora_Ea315_1	7	3	incomplete
3#Erwinia_amylovora_Ea1189	7	3	incomplete
3#Erwinia_amylovora_39_I_II	7	3	incomplete
3#Erwinia_amylovora_32_10	7	3	incomplete
3#Erwinia_amylovora_11_7	7	3	incomplete
1#Erwinia_amylovora_WSDA87_73	7	3	incomplete
1#Erwinia_amylovora_VTBL01_1	7	3	incomplete
1#Erwinia_amylovora_NHSB01_1	7	3	incomplete
1#Erwinia_amylovora_Ea321	7	3	incomplete
1#Erwinia_amylovora_EA110	7	3	incomplete
1#Erwinia_amylovora_33_1	7	3	incomplete
1#Erwinia_amylovora_1476	7	3	incomplete
1#Erwinia_amylovora_1581	7	3	incomplete
1#Erwinia_amylovora_MLI200_18	7	3	incomplete
3#Erwinia_amylovora_VTDMSF02	7	3	incomplete
3#Erwinia_amylovora_RISTBO01_2	7	3	incomplete
3#Erwinia_amylovora_CTBT1_1	7	3	incomplete
3#Erwinia_amylovora_MAGFLF_2	7	3	incomplete
3#Erwinia_amylovora_Ea433	7	3	incomplete
3#Erwinia_amylovora_CTBT3_1	7	3	incomplete
1#Erwinia_amylovora_NHWL02_2	7	3	incomplete
1#Erwinia_amylovora_CTMF03_1	7	3	incomplete
1#Erwinia_amylovora_CTST01_1	7	3	incomplete
1#Erwinia_amylovora_1668	7	3	incomplete
1#Erwinia_amylovora_Ea3a_H1_II	7	3	incomplete
3#Erwinia_amylovora_Ea29_7	7	3	incomplete
3#Erwinia_amylovora_EaD_7	7	3	incomplete
2#Erwinia_amylovora_1480_3	7	3	incomplete
3#Erwinia_amylovora_2570	7	3	incomplete
3#Erwinia_amylovora_E2005A	7	3	incomplete
1#Erwinia_amylovora_1612	8	6	incomplete
2#Erwinia_amylovora_214_07	8	6	incomplete
2#Erwinia_amylovora_2570	8	6	incomplete
3#Erwinia_amylovora_1668	8	6	incomplete
2#Erwinia_amylovora_IVIA2303	8	6	incomplete
2#Erwinia_amylovora_Ea650	8	6	incomplete
2#Erwinia_amylovora_Ea17_1_1	8	6	incomplete
2#Erwinia_amylovora_CFBP_7130	8	6	incomplete
2#Erwinia_amylovora_39_I_II	8	6	incomplete
2#Erwinia_amylovora_20070270	8	6	incomplete
2#Erwinia_amylovora_1400_1	8	6	incomplete
2#Erwinia_amylovora_20070245	8	6	incomplete
2#Erwinia_amylovora_O_RG_21	8	6	incomplete
2#Erwinia_amylovora_MLI217_18	8	6	incomplete
2#Erwinia_amylovora_Ea92_1_1	8	6	incomplete
2#Erwinia_amylovora_Ea92_1_2	8	6	incomplete
2#Erwinia_amylovora_Ea367	8	6	incomplete
2#Erwinia_amylovora_Ea464	8	6	incomplete
2#Erwinia_amylovora_39_M1_II	8	6	incomplete
2#Erwinia_amylovora_Ea29_7	8	6	incomplete
1#Erwinia_amylovora_Ea440	8	6	incomplete
1#Erwinia_amylovora_3477_1	8	6	incomplete
1#Erwinia_amylovora_245_07	8	6	incomplete
1#Erwinia_amylovora_2558	8	6	incomplete
1#Erwinia_amylovora_Ea435	8	6	incomplete
2#Erwinia_amylovora_WSDA87_73	8	6	incomplete
2#Erwinia_amylovora_VTBL01_1	8	6	incomplete
2#Erwinia_amylovora_UT5P4	8	6	incomplete
2#Erwinia_amylovora_NHSB01_1	8	6	incomplete
2#Erwinia_amylovora_Ea321	8	6	incomplete
2#Erwinia_amylovora_EA110	8	6	incomplete
2#Erwinia_amylovora_1476	8	6	incomplete
2#Erwinia_amylovora_1279	8	6	incomplete
1#Erwinia_amylovora_P_C_3b	8	6	incomplete
1#Erwinia_amylovora_MLI90_17	8	6	incomplete
1#Erwinia_amylovora_EaD_7	8	6	incomplete
1#Erwinia_amylovora_EaB_110	8	6	incomplete
1#Erwinia_amylovora_Ea6_4	8	6	incomplete
1#Erwinia_amylovora_Ea315_1	8	6	incomplete
1#Erwinia_amylovora_Ea169	8	6	incomplete
1#Erwinia_amylovora_Ea116_5_29	8	6	incomplete
1#Erwinia_amylovora_E2005A	8	6	incomplete
1#Erwinia_amylovora_CFBP_1995	8	6	incomplete
1#Erwinia_amylovora_20070126	8	6	incomplete
1#Erwinia_amylovora_1477_1	8	6	incomplete
1#Erwinia_amylovora_1680	8	6	incomplete
1#Erwinia_amylovora_46_4_2	8	6	incomplete
2#Erwinia_amylovora_Ea3a_H1_II	8	6	incomplete
2#Erwinia_amylovora_241_07	8	6	incomplete
1#Erwinia_amylovora_Fb_97b	8	6	incomplete
1#Erwinia_amylovora_Ea6_97	8	6	incomplete
1#Erwinia_amylovora_Ea4_97	8	6	incomplete
1#Erwinia_amylovora_Ea5_97	8	6	incomplete
1#Erwinia_amylovora_3446_1	9	7	incomplete
1#Erwinia_amylovora_7_3	10	8	incomplete
1#Erwinia_amylovora_FB_307	11	9	incomplete
1#Erwinia_amylovora_TS3238	11	9	incomplete
1#Erwinia_amylovora_FB_86	11	9	incomplete
1#Erwinia_amylovora_FB_20	11	9	incomplete
1#Erwinia_amylovora_FB_207	11	9	incomplete
1#Erwinia_amylovora_Ea1189	11	9	incomplete
1#Erwinia_amylovora_ATCC_49946	11	9	incomplete
1#Erwinia_amylovora_E_2	11	9	incomplete
1#Erwinia_amylovora_MAGFLF_2	11	9	incomplete
2#Erwinia_amylovora_MLI200_18	11	9	incomplete
1#Erwinia_amylovora_CTBT3_1	11	9	incomplete
1#Erwinia_amylovora_CTBT1_1	11	9	incomplete
1#Erwinia_amylovora_MANB02_1	11	9	incomplete
2#Erwinia_amylovora_NHWL02_2	11	9	incomplete
2#Erwinia_amylovora_CTST01_1	11	9	incomplete
1#Erwinia_amylovora_RISTBO01_2	11	9	incomplete
1#Erwinia_amylovora_VTDMSF02	11	9	incomplete
2#Erwinia_amylovora_CTMF03_1	11	9	incomplete
2#Erwinia_amylovora_EaG5	11	9	incomplete
1#Erwinia_amylovora_Ea433	11	9	incomplete
1#Erwinia_amylovora_MLI181_18	11	9	incomplete
1#Erwinia_amylovora_CFBP_7131	12	6	incomplete
1#Erwinia_amylovora_CA3R	12	6	incomplete
2#Erwinia_amylovora_3446_1	12	6	incomplete
1#Erwinia_amylovora_E2006P	13	10	incomplete
1#Erwinia_amylovora_Ea01_03	14	11	questionable
3#Erwinia_amylovora_Ea1_00	14	11	questionable
1#Erwinia_amylovora_Ea02_03	15	12	intact
2#Erwinia_amylovora_Ea03_03	15	12	intact
1#Erwinia_amylovora_Ea1_95	16	13	incomplete
1#Erwinia_amylovora_Ea7_96	16	13	incomplete
1#Erwinia_amylovora_Ea03_03	16	13	incomplete
1#Erwinia_amylovora_EaLevo2	16	13	incomplete
1#Erwinia_amylovora_Ea04_03	17	14	intact
5#Erwinia_amylovora_Ea8_96	17	14	intact
1#Erwinia_amylovora_Ea123_5_51	18	15	intact
1#Erwinia_amylovora_Ea160_4_51	19	16	incomplete
1#Erwinia_amylovora_Ea2_95	19	16	incomplete
1#Erwinia_amylovora_Ea1_97	20	16	incomplete
1#Erwinia_amylovora_Ea1_98	21	13	incomplete
2#Erwinia_amylovora_Ea4_96	22	17	incomplete
1#Erwinia_amylovora_Ea2_97	22	17	incomplete
3#Erwinia_amylovora_Ea3_97	22	17	incomplete
3#Erwinia_amylovora_Ea4_96	23	18	intact
1#Erwinia_amylovora_Ea3_97	23	18	intact
2#Erwinia_amylovora_Ea2_97	23	18	intact
2#Erwinia_amylovora_Ea7_96	24	12	intact
1#Erwinia_amylovora_Ea4_96	24	12	questionable
2#Erwinia_amylovora_Ea3_97	24	12	questionable
1#Erwinia_amylovora_Ea644	25	12	questionable
1#Erwinia_amylovora_Ea6_96	26	19	incomplete
2#Erwinia_amylovora_Ea8_96	26	19	incomplete
1#Erwinia_amylovora_Ea8_96	27	20	questionable
3#Erwinia_amylovora_Ea04_03	27	20	questionable
4#Erwinia_amylovora_Ea6_96	27	20	questionable
2#Erwinia_amylovora_Ea1_98	27	20	questionable
3#Erwinia_amylovora_Ea2_97	27	20	questionable
1#Erwinia_amylovora_EaA_11	28	21	incomplete
3#Erwinia_amylovora_Ea160_4_51	29	2	incomplete
1#Erwinia_amylovora_EaIF	29	2	incomplete
2#Erwinia_amylovora_IH_3_1	29	2	incomplete
3#Erwinia_amylovora_1480_3	30	4	incomplete
2#Erwinia_amylovora_20070126	30	4	incomplete
2#Erwinia_amylovora_P_C_3b	30	4	incomplete
2#Erwinia_amylovora_2558	30	4	incomplete
3#Erwinia_amylovora_1686	30	4	incomplete
3#Erwinia_amylovora_1476	30	4	incomplete
2#Erwinia_amylovora_3477_1	30	4	incomplete
3#Erwinia_amylovora_1279	30	4	incomplete
4#Erwinia_amylovora_Ea01_03	30	4	incomplete
1#Erwinia_amylovora_IH_3_1	30	4	incomplete
5#Erwinia_amylovora_E2006P	30	4	incomplete
1#Erwinia_amylovora_MASHBO	31	17	incomplete
1#Erwinia_aphidicola_JCM_21238	32	22	intact
1#Erwinia_aphidicola_isolate_Bi13	32	22	intact
1#Erwinia_phyllosphaerae_CMYE1	33	23	questionable
1#Erwinia_billingiae_Eb661	34	24	intact
1#Erwinia_billingiae_MYb121	35	25	incomplete
1#Erwinia_billingiae_PBb	36	26	intact
1#Erwinia_billingiae_TH88	37	27	incomplete
1#Erwinia_billingiae_isolate_UBA5038	38	28	intact
1#Erwinia_dacicola_Oroville	39	29	incomplete
1#Erwinia_endophytica_A41C3	40	30	incomplete
4#Erwinia_gerundensis_EM595	41	31	incomplete
1#Erwinia_gerundensis_AR	41	31	incomplete
1#Erwinia_gerundensis_isolate_A4	41	31	incomplete
1#Erwinia_gerundensis_Eg13_3	42	32	incomplete
1#Erwinia_gerundensis_Eg13_2	42	32	incomplete
5#Erwinia_gerundensis_Eg31_2	42	32	incomplete
1#Erwinia_gerundensis_Eg31_2	43	33	intact
1#Erwinia_gerundensis_Eg31_5	44	31	incomplete
1#Erwinia_iniecta_B120	45	34	incomplete
1#Erwinia_iniecta_B149	45	34	incomplete
1#Erwinia_mallotivora_BT_MARDI	46	35	incomplete
1#Erwinia_oleae_DAPP_PG531	47	36	incomplete
1#Erwinia_persicina_B64	48	37	incomplete
1#Erwinia_persicina_CFBP1351100_0	49	38	intact
4#Erwinia_persicina_CFBP8795_CFBP879501	50	39	intact
2#Erwinia_persicina_NBRC_102418_DNA	50	39	intact
6#Erwinia_persicina_Cp2	50	39	intact
5#Erwinia_persicina_B64	50	39	intact
6#Erwinia_persicina_CFBP1351100_0	50	39	intact
1#Erwinia_persicina_CFBP13732_CFBP13732001	50	39	intact
1#Erwinia_persicina_CFBP8767_CFBP8767001	50	39	intact
1#Erwinia_persicina_CFBP8795_CFBP879501	51	40	incomplete
1#Erwinia_persicina_CFBP8797_CFBP879701	52	39	intact
1#Erwinia_persicina_CFBP8803_CFBP880301	53	39	intact
1#Erwinia_persicina_Cp2	54	41	intact
1#Erwinia_persicina_DOAB1061_DOAB1061	55	42	intact
1#Erwinia_persicina_NBRC_102418_DNA	56	43	incomplete
1#Erwinia_piriflorinigrans_CFBP_5888	57	44	incomplete
1#Erwinia_psidii_IBSBF_435	58	45	incomplete
1#Erwinia_pyrifoliae_DSM_12163	59	46	incomplete
7#Erwinia_pyrifoliae_EpK1_15	59	46	incomplete
1#Erwinia_pyrifoliae_Ep1_96	59	46	incomplete
1#Erwinia_pyrifoliae_YKB12328	59	46	incomplete
1#Erwinia_pyrifoliae_EpK1_15	60	47	incomplete
6#Erwinia_pyrifoliae_DSM_12163	60	47	incomplete
6#Erwinia_pyrifoliae_Ep1_96	60	47	incomplete
6#Erwinia_pyrifoliae_YKB12328	60	47	incomplete
1#Erwinia_rhapontici_BIGb0435_Ga0304803	61	48	intact
1#Erwinia_rhapontici_BY21311	62	49	incomplete
1#Erwinia_rhapontici_CGMCC16978	63	50	intact
1#Erwinia_rhapontici_H1	64	51	intact
1#Erwinia_rhapontici_MAFF_311153	65	52	incomplete
4#Erwinia_sp_JH02	65	52	incomplete
1#Erwinia_rhapontici_MAFF_311154	66	53	incomplete
1#Erwinia_rhapontici_WS3235_Ga0466830	67	54	intact
7#Erwinia_rhapontici_CGMCC16978	67	54	intact
1#Erwinia_sp_198	68	55	incomplete
1#Erwinia_sp_9145_FA91DRAFT	69	56	intact
1#Erwinia_sp_B116	70	57	incomplete
1#Erwinia_sp_E602	71	58	intact
1#Erwinia_gerundensis_EM595	72	59	incomplete
1#Erwinia_sp_Ejp617	73	60	incomplete
1#Erwinia_sp_ErVv1	74	61	incomplete
1#Erwinia_sp_J316	75	62	incomplete
1#Erwinia_sp_J780	75	62	incomplete
1#Erwinia_sp_JH02	76	63	incomplete
1#Erwinia_sp_JUb26_Ga0304838	77	64	incomplete
1#Erwinia_sp_Leaf53	78	58	intact
7#Erwinia_sp_OLTSP20	79	65	incomplete
5#Erwinia_sp_OLSSP12	79	65	incomplete
1#Erwinia_sp_OAMSP11	79	65	incomplete
1#Erwinia_sp_OLMDSP33	79	65	incomplete
1#Erwinia_sp_OLFS4	80	66	incomplete
2#Erwinia_sp_OLTSP20	80	66	incomplete
1#Erwinia_sp_OLCASP19	80	66	incomplete
2#Erwinia_sp_OLMDSP33	80	66	incomplete
2#Erwinia_sp_OAMSP11	80	66	incomplete
1#Erwinia_sp_OLMTSP26	80	66	incomplete
1#Erwinia_sp_OLSSP12	80	66	incomplete
1#Erwinia_sp_OLTSP20	81	67	incomplete
9#Erwinia_sp_OLFS4	81	67	incomplete
2#Erwinia_billingiae_isolate_UBA5038	82	68	incomplete
2#Erwinia_billingiae_MYb121	82	68	incomplete
1#Erwinia_sp_QL_Z3	82	68	incomplete
5#Erwinia_billingiae_Eb661	82	68	incomplete
1#Erwinia_sp_S38	83	69	intact
1#Erwinia_sp_S43	84	70	incomplete
1#Erwinia_tasmaniensis_ET1_99	85	71	incomplete
1#Erwinia_toletana_DAPP_PG_735	86	72	incomplete
5#Erwinia_toletana_WS4403_Ga0466831	86	72	incomplete
1#Erwinia_toletana_WS4403_Ga0466831	87	73	intact
1#Erwinia_tracheiphila_BHKY	88	74	incomplete
1#Erwinia_tracheiphila_BuffGH	88	74	questionable
1#Erwinia_tracheiphila_MDCuke	89	75	intact
1#Erwinia_tracheiphila_SCR3	89	75	intact
1#Erwinia_tracheiphila_PSU_1	90	76	intact
1#Erwinia_typographi_M043b	91	77	intact
10#Erwinia_dacicola_IL	92	78	incomplete
10#Erwinia_dacicola_Oroville	93	79	intact
10#Erwinia_endophytica_A41C3	94	80	incomplete
10#Erwinia_persicina_CFBP8795_CFBP879501	95	81	intact
10#Erwinia_sp_S38	96	82	incomplete
10#Erwinia_tracheiphila_BHKY	97	83	intact
11#Erwinia_tracheiphila_BuffGH	97	83	intact
11#Erwinia_tracheiphila_PSU_1	98	84	intact
10#Erwinia_tracheiphila_BuffGH	98	84	intact
9#Erwinia_tracheiphila_BHKY	98	84	intact
10#Erwinia_tracheiphila_MDCuke	99	85	intact
10#Erwinia_tracheiphila_PSU_1	100	83	questionable
10#Erwinia_tracheiphila_SCR3	101	85	intact
10#Erwinia_typographi_M043b	102	86	incomplete
11#Erwinia_dacicola_IL	103	87	incomplete
11#Erwinia_dacicola_Oroville	104	88	questionable
9#Erwinia_dacicola_IL	104	88	questionable
11#Erwinia_persicina_CFBP8795_CFBP879501	105	89	incomplete
11#Erwinia_tracheiphila_BHKY	106	90	intact
12#Erwinia_tracheiphila_BuffGH	106	90	intact
11#Erwinia_tracheiphila_MDCuke	107	83	intact
12#Erwinia_tracheiphila_SCR3	107	83	intact
11#Erwinia_tracheiphila_SCR3	108	91	incomplete
11#Erwinia_typographi_M043b	109	92	incomplete
12#Erwinia_dacicola_IL	110	93	incomplete
5#Erwinia_dacicola_Oroville	110	93	incomplete
12#Erwinia_dacicola_Oroville	111	94	questionable
12#Erwinia_tracheiphila_BHKY	112	95	questionable
13#Erwinia_tracheiphila_BuffGH	112	95	questionable
28#Erwinia_tracheiphila_BHKY	113	96	questionable
30#Erwinia_tracheiphila_BuffGH	113	96	questionable
12#Erwinia_tracheiphila_MDCuke	113	96	questionable
13#Erwinia_tracheiphila_SCR3	113	96	questionable
12#Erwinia_tracheiphila_PSU_1	114	97	incomplete
13#Erwinia_dacicola_IL	115	98	questionable
13#Erwinia_tracheiphila_BHKY	116	99	incomplete
14#Erwinia_tracheiphila_BuffGH	116	99	incomplete
13#Erwinia_tracheiphila_MDCuke	117	100	intact
13#Erwinia_tracheiphila_PSU_1	118	101	incomplete
14#Erwinia_dacicola_IL	119	102	incomplete
14#Erwinia_tracheiphila_BHKY	120	103	intact
15#Erwinia_tracheiphila_BuffGH	120	103	intact
14#Erwinia_tracheiphila_MDCuke	121	104	questionable
14#Erwinia_tracheiphila_PSU_1	122	105	incomplete
14#Erwinia_tracheiphila_SCR3	123	106	intact
15#Erwinia_tracheiphila_BHKY	124	107	intact
15#Erwinia_tracheiphila_MDCuke	125	108	intact
15#Erwinia_tracheiphila_SCR3	125	108	intact
15#Erwinia_tracheiphila_PSU_1	126	109	incomplete
23#Erwinia_tracheiphila_MDCuke	127	110	incomplete
16#Erwinia_tracheiphila_BHKY	127	110	incomplete
18#Erwinia_tracheiphila_BuffGH	127	110	incomplete
16#Erwinia_tracheiphila_BuffGH	128	111	intact
16#Erwinia_tracheiphila_MDCuke	129	112	incomplete
16#Erwinia_tracheiphila_SCR3	129	112	incomplete
16#Erwinia_tracheiphila_PSU_1	130	113	incomplete
17#Erwinia_tracheiphila_BHKY	131	114	intact
19#Erwinia_tracheiphila_BuffGH	131	114	intact
17#Erwinia_tracheiphila_BuffGH	132	75	intact
17#Erwinia_tracheiphila_MDCuke	133	115	intact
17#Erwinia_tracheiphila_SCR3	133	115	intact
17#Erwinia_tracheiphila_PSU_1	134	116	incomplete
18#Erwinia_tracheiphila_BHKY	135	117	questionable
20#Erwinia_tracheiphila_BuffGH	135	117	questionable
18#Erwinia_tracheiphila_MDCuke	136	118	intact
18#Erwinia_tracheiphila_SCR3	136	118	intact
18#Erwinia_tracheiphila_PSU_1	137	119	incomplete
19#Erwinia_tracheiphila_BHKY	138	84	intact
21#Erwinia_tracheiphila_BuffGH	138	84	intact
21#Erwinia_tracheiphila_BHKY	139	120	intact
23#Erwinia_tracheiphila_BuffGH	139	120	intact
19#Erwinia_tracheiphila_MDCuke	139	120	questionable
19#Erwinia_tracheiphila_SCR3	139	120	questionable
19#Erwinia_tracheiphila_PSU_1	140	121	intact
8#Erwinia_tracheiphila_BHKY	140	121	intact
9#Erwinia_tracheiphila_BuffGH	140	121	intact
2#Erwinia_dacicola_IL	141	122	questionable
4#Erwinia_dacicola_Oroville	141	122	questionable
2#Erwinia_amylovora_1400_2	142	123	incomplete
2#Erwinia_amylovora_1686	143	6	incomplete
2#Erwinia_amylovora_Ea266	143	6	incomplete
2#Erwinia_amylovora_33_1	144	124	incomplete
2#Erwinia_amylovora_3515_1	145	3	incomplete
2#Erwinia_amylovora_CFBP_2313	146	125	incomplete
2#Erwinia_amylovora_CFBP_2585	147	123	incomplete
2#Erwinia_amylovora_CFBP_7131	148	125	incomplete
2#Erwinia_amylovora_E2006P	149	126	intact
2#Erwinia_amylovora_Ea01_03	150	127	incomplete
2#Erwinia_amylovora_Ea1_00	150	127	incomplete
2#Erwinia_amylovora_Ea02_03	151	128	incomplete
2#Erwinia_amylovora_Ea04_03	152	128	incomplete
2#Erwinia_amylovora_Ea6_96	152	128	incomplete
3#Erwinia_amylovora_Ea8_96	152	128	incomplete
2#Erwinia_amylovora_Ea1_95	153	12	intact
3#Erwinia_amylovora_Ea1_97	153	12	questionable
2#Erwinia_amylovora_Ea1_97	154	13	incomplete
2#Erwinia_amylovora_Ea2_95	155	129	incomplete
2#Erwinia_amylovora_Ea644	156	13	incomplete
2#Erwinia_amylovora_EaLevo2	157	130	incomplete
2#Erwinia_aphidicola_JCM_21238	158	131	intact
2#Erwinia_aphidicola_isolate_Bi13	159	132	intact
2#Erwinia_phyllosphaerae_CMYE1	160	133	incomplete
2#Erwinia_billingiae_Eb661	161	134	questionable
2#Erwinia_billingiae_PBb	162	135	incomplete
2#Erwinia_billingiae_TH88	163	136	intact
2#Erwinia_dacicola_Oroville	164	137	incomplete
2#Erwinia_endophytica_A41C3	165	138	intact
2#Erwinia_gerundensis_AR	166	139	incomplete
3#Erwinia_gerundensis_EM595	166	139	incomplete
2#Erwinia_gerundensis_Eg13_2	167	140	incomplete
2#Erwinia_gerundensis_Eg13_3	167	140	incomplete
2#Erwinia_gerundensis_Eg31_2	168	141	incomplete
2#Erwinia_gerundensis_Eg31_5	169	142	incomplete
2#Erwinia_gerundensis_isolate_A4	170	143	incomplete
2#Erwinia_iniecta_B120	171	144	incomplete
2#Erwinia_iniecta_B149	171	144	incomplete
2#Erwinia_mallotivora_BT_MARDI	172	145	incomplete
2#Erwinia_oleae_DAPP_PG531	173	146	intact
2#Erwinia_persicina_B64	174	147	intact
2#Erwinia_persicina_CFBP1351100_0	175	148	incomplete
2#Erwinia_persicina_CFBP13732_CFBP13732001	176	149	incomplete
2#Erwinia_persicina_CFBP8767_CFBP8767001	176	149	incomplete
2#Erwinia_persicina_CFBP8795_CFBP879501	177	150	questionable
5#Erwinia_persicina_Cp2	177	150	questionable
2#Erwinia_persicina_CFBP8797_CFBP879701	178	151	incomplete
2#Erwinia_persicina_CFBP8803_CFBP880301	179	152	incomplete
2#Erwinia_persicina_Cp2	180	153	incomplete
2#Erwinia_persicina_DOAB1061_DOAB1061	181	154	incomplete
2#Erwinia_piriflorinigrans_CFBP_5888	182	17	incomplete
2#Erwinia_psidii_IBSBF_435	183	155	intact
6#Erwinia_pyrifoliae_EpK1_15	184	156	incomplete
2#Erwinia_pyrifoliae_YKB12328	184	156	incomplete
2#Erwinia_pyrifoliae_DSM_12163	184	156	incomplete
2#Erwinia_pyrifoliae_Ep1_96	184	156	incomplete
2#Erwinia_pyrifoliae_EpK1_15	185	157	intact
3#Erwinia_rhapontici_MAFF_311153	186	54	intact
2#Erwinia_rhapontici_BIGb0435_Ga0304803	186	54	intact
5#Erwinia_rhapontici_MAFF_311154	186	54	intact
2#Erwinia_rhapontici_BY21311	187	54	intact
5#Erwinia_rhapontici_H1	187	54	intact
2#Erwinia_rhapontici_CGMCC16978	188	158	intact
3#Erwinia_rhapontici_WS3235_Ga0466830	188	158	intact
2#Erwinia_rhapontici_H1	189	159	intact
2#Erwinia_rhapontici_MAFF_311153	190	160	incomplete
2#Erwinia_rhapontici_MAFF_311154	191	52	questionable
2#Erwinia_rhapontici_WS3235_Ga0466830	192	161	questionable
8#Erwinia_rhapontici_CGMCC16978	192	161	questionable
2#Erwinia_sp_198	193	162	intact
2#Erwinia_sp_9145_FA91DRAFT	194	163	intact
2#Erwinia_sp_E602	195	164	intact
2#Erwinia_gerundensis_EM595	196	165	intact
2#Erwinia_sp_Ejp617	197	166	intact
2#Erwinia_sp_ErVv1	198	167	incomplete
2#Erwinia_sp_J780	199	168	incomplete
2#Erwinia_sp_JH02	200	169	questionable
2#Erwinia_sp_JUb26_Ga0304838	201	70	incomplete
2#Erwinia_sp_Leaf53	202	170	intact
2#Erwinia_sp_OLFS4	203	171	incomplete
3#Erwinia_sp_OLMDSP33	203	171	incomplete
3#Erwinia_sp_OAMSP11	203	171	incomplete
2#Erwinia_sp_OLCASP19	203	171	incomplete
2#Erwinia_sp_OLMTSP26	203	171	incomplete
4#Erwinia_sp_OLTSP20	204	172	incomplete
3#Erwinia_sp_OLFS4	204	172	incomplete
4#Erwinia_sp_OAMSP11	204	172	incomplete
4#Erwinia_sp_OLMDSP33	204	172	incomplete
3#Erwinia_sp_OLMTSP26	204	172	incomplete
2#Erwinia_sp_OLSSP12	204	172	incomplete
3#Erwinia_sp_OLCASP19	204	172	incomplete
2#Erwinia_sp_QL_Z3	205	173	incomplete
2#Erwinia_sp_S38	206	174	intact
2#Erwinia_sp_S43	207	175	intact
2#Erwinia_tasmaniensis_ET1_99	208	176	incomplete
2#Erwinia_toletana_DAPP_PG_735	209	73	intact
2#Erwinia_toletana_WS4403_Ga0466831	210	177	questionable
5#Erwinia_toletana_DAPP_PG_735	210	177	questionable
2#Erwinia_tracheiphila_BHKY	211	178	incomplete
2#Erwinia_tracheiphila_BuffGH	211	178	incomplete
2#Erwinia_tracheiphila_MDCuke	212	179	incomplete
2#Erwinia_tracheiphila_SCR3	212	179	incomplete
2#Erwinia_tracheiphila_PSU_1	213	180	incomplete
2#Erwinia_typographi_M043b	214	181	incomplete
20#Erwinia_tracheiphila_BHKY	215	182	intact
22#Erwinia_tracheiphila_BuffGH	215	182	intact
20#Erwinia_tracheiphila_MDCuke	216	183	incomplete
20#Erwinia_tracheiphila_SCR3	216	183	incomplete
20#Erwinia_tracheiphila_PSU_1	217	184	incomplete
21#Erwinia_tracheiphila_MDCuke	218	184	questionable
21#Erwinia_tracheiphila_SCR3	218	184	questionable
21#Erwinia_tracheiphila_PSU_1	219	185	incomplete
22#Erwinia_tracheiphila_BHKY	220	186	intact
24#Erwinia_tracheiphila_BuffGH	220	186	intact
22#Erwinia_tracheiphila_MDCuke	221	187	intact
22#Erwinia_tracheiphila_PSU_1	222	188	incomplete
22#Erwinia_tracheiphila_SCR3	223	187	intact
23#Erwinia_tracheiphila_BHKY	224	189	intact
25#Erwinia_tracheiphila_BuffGH	224	189	questionable
23#Erwinia_tracheiphila_SCR3	225	110	questionable
24#Erwinia_tracheiphila_BHKY	226	115	intact
24#Erwinia_tracheiphila_MDCuke	227	190	questionable
24#Erwinia_tracheiphila_SCR3	227	190	questionable
25#Erwinia_tracheiphila_BHKY	228	112	intact
27#Erwinia_tracheiphila_BuffGH	228	112	intact
25#Erwinia_tracheiphila_MDCuke	229	191	intact
25#Erwinia_tracheiphila_SCR3	229	191	intact
26#Erwinia_tracheiphila_BHKY	230	108	intact
28#Erwinia_tracheiphila_BuffGH	230	108	intact
26#Erwinia_tracheiphila_BuffGH	231	76	intact
26#Erwinia_tracheiphila_MDCuke	232	107	questionable
26#Erwinia_tracheiphila_SCR3	232	107	questionable
27#Erwinia_tracheiphila_BHKY	233	106	intact
29#Erwinia_tracheiphila_BuffGH	233	106	intact
27#Erwinia_tracheiphila_MDCuke	234	103	intact
27#Erwinia_tracheiphila_SCR3	234	103	intact
28#Erwinia_tracheiphila_MDCuke	235	192	intact
28#Erwinia_tracheiphila_SCR3	235	192	intact
29#Erwinia_tracheiphila_BHKY	236	193	questionable
31#Erwinia_tracheiphila_BuffGH	236	193	questionable
29#Erwinia_tracheiphila_MDCuke	237	194	incomplete
29#Erwinia_tracheiphila_SCR3	237	194	incomplete
3#Erwinia_dacicola_IL	238	195	incomplete
4#Erwinia_amylovora_32_10	239	196	incomplete
3#Erwinia_amylovora_1_2	239	196	incomplete
4#Erwinia_amylovora_11_7	239	196	incomplete
3#Erwinia_amylovora_CA3R	240	130	questionable
3#Erwinia_amylovora_E2006P	241	197	questionable
4#Erwinia_amylovora_Ea160_4_51	241	197	questionable
3#Erwinia_amylovora_Ea01_03	242	8	incomplete
3#Erwinia_amylovora_Ea6_96	243	198	incomplete
4#Erwinia_amylovora_Ea8_96	243	198	incomplete
3#Erwinia_aphidicola_JCM_21238	244	199	incomplete
3#Erwinia_aphidicola_isolate_Bi13	245	37	incomplete
3#Erwinia_phyllosphaerae_CMYE1	246	200	incomplete
3#Erwinia_billingiae_Eb661	247	201	questionable
3#Erwinia_billingiae_MYb121	248	202	incomplete
3#Erwinia_billingiae_PBb	249	203	incomplete
3#Erwinia_billingiae_TH88	250	25	incomplete
3#Erwinia_billingiae_isolate_UBA5038	251	204	intact
3#Erwinia_dacicola_Oroville	252	205	incomplete
3#Erwinia_endophytica_A41C3	253	206	incomplete
3#Erwinia_gerundensis_Eg31_2	254	207	questionable
3#Erwinia_gerundensis_Eg31_5	255	208	incomplete
3#Erwinia_mallotivora_BT_MARDI	256	209	incomplete
3#Erwinia_persicina_B64	257	210	incomplete
3#Erwinia_persicina_CFBP1351100_0	258	211	incomplete
5#Erwinia_persicina_CFBP1351100_0	259	150	questionable
3#Erwinia_persicina_CFBP13732_CFBP13732001	259	150	questionable
3#Erwinia_persicina_CFBP8767_CFBP8767001	259	150	questionable
3#Erwinia_persicina_CFBP8795_CFBP879501	260	212	questionable
3#Erwinia_persicina_CFBP8803_CFBP880301	261	213	incomplete
3#Erwinia_persicina_Cp2	262	214	incomplete
3#Erwinia_persicina_DOAB1061_DOAB1061	263	39	intact
3#Erwinia_persicina_NBRC_102418_DNA	264	215	incomplete
3#Erwinia_piriflorinigrans_CFBP_5888	265	216	intact
3#Erwinia_psidii_IBSBF_435	266	217	incomplete
3#Erwinia_pyrifoliae_YKB12328	267	17	incomplete
3#Erwinia_pyrifoliae_DSM_12163	267	17	incomplete
3#Erwinia_pyrifoliae_Ep1_96	267	17	incomplete
5#Erwinia_pyrifoliae_EpK1_15	267	17	incomplete
3#Erwinia_pyrifoliae_EpK1_15	268	218	intact
5#Erwinia_pyrifoliae_YKB12328	268	218	intact
3#Erwinia_rhapontici_BIGb0435_Ga0304803	269	219	incomplete
3#Erwinia_rhapontici_BY21311	270	81	intact
3#Erwinia_rhapontici_CGMCC16978	271	220	intact
3#Erwinia_rhapontici_H1	272	221	intact
3#Erwinia_rhapontici_MAFF_311154	273	222	intact
3#Erwinia_sp_198	274	223	incomplete
3#Erwinia_sp_9145_FA91DRAFT	275	224	incomplete
3#Erwinia_sp_E602	276	225	questionable
3#Erwinia_sp_Ejp617	277	226	incomplete
3#Erwinia_sp_ErVv1	278	227	incomplete
3#Erwinia_sp_JH02	279	228	questionable
3#Erwinia_sp_Leaf53	280	229	intact
3#Erwinia_sp_OLSSP12	281	230	incomplete
4#Erwinia_sp_OLCASP19	281	230	incomplete
3#Erwinia_sp_OLTSP20	282	171	incomplete
3#Erwinia_sp_QL_Z3	283	231	incomplete
3#Erwinia_sp_S38	284	232	questionable
3#Erwinia_sp_S43	285	233	intact
3#Erwinia_tasmaniensis_ET1_99	286	234	questionable
3#Erwinia_toletana_DAPP_PG_735	287	235	questionable
3#Erwinia_toletana_WS4403_Ga0466831	288	236	incomplete
3#Erwinia_tracheiphila_BHKY	289	237	incomplete
3#Erwinia_tracheiphila_BuffGH	290	238	questionable
3#Erwinia_tracheiphila_MDCuke	291	239	incomplete
3#Erwinia_tracheiphila_SCR3	291	239	incomplete
3#Erwinia_tracheiphila_PSU_1	292	240	questionable
3#Erwinia_typographi_M043b	293	241	intact
30#Erwinia_tracheiphila_BHKY	294	242	intact
32#Erwinia_tracheiphila_BuffGH	294	242	intact
30#Erwinia_tracheiphila_MDCuke	295	84	intact
31#Erwinia_tracheiphila_SCR3	295	84	intact
8#Erwinia_tracheiphila_MDCuke	295	84	intact
8#Erwinia_tracheiphila_SCR3	295	84	intact
30#Erwinia_tracheiphila_SCR3	296	243	questionable
31#Erwinia_tracheiphila_BHKY	297	244	intact
33#Erwinia_tracheiphila_BuffGH	297	244	intact
31#Erwinia_tracheiphila_MDCuke	298	245	questionable
32#Erwinia_tracheiphila_SCR3	298	245	questionable
32#Erwinia_tracheiphila_BHKY	299	246	incomplete
34#Erwinia_tracheiphila_BuffGH	299	246	incomplete
32#Erwinia_tracheiphila_MDCuke	300	247	incomplete
33#Erwinia_tracheiphila_SCR3	300	247	incomplete
33#Erwinia_tracheiphila_BHKY	301	248	questionable
35#Erwinia_tracheiphila_BuffGH	301	248	questionable
33#Erwinia_tracheiphila_MDCuke	302	249	incomplete
34#Erwinia_tracheiphila_SCR3	302	249	incomplete
34#Erwinia_tracheiphila_BHKY	303	250	intact
36#Erwinia_tracheiphila_BuffGH	303	250	intact
34#Erwinia_tracheiphila_MDCuke	304	251	incomplete
35#Erwinia_tracheiphila_SCR3	304	251	incomplete
35#Erwinia_tracheiphila_BHKY	305	252	intact
37#Erwinia_tracheiphila_BuffGH	305	252	intact
35#Erwinia_tracheiphila_MDCuke	306	253	incomplete
36#Erwinia_tracheiphila_BHKY	307	245	incomplete
38#Erwinia_tracheiphila_BuffGH	307	245	incomplete
36#Erwinia_tracheiphila_MDCuke	308	254	intact
36#Erwinia_tracheiphila_SCR3	308	254	intact
9#Erwinia_tracheiphila_PSU_1	309	255	intact
37#Erwinia_tracheiphila_BHKY	309	255	intact
4#Erwinia_tracheiphila_BuffGH	309	255	intact
37#Erwinia_tracheiphila_MDCuke	310	256	questionable
37#Erwinia_tracheiphila_SCR3	310	256	questionable
38#Erwinia_tracheiphila_BHKY	311	257	questionable
38#Erwinia_tracheiphila_MDCuke	312	258	intact
39#Erwinia_tracheiphila_SCR3	312	258	intact
38#Erwinia_tracheiphila_SCR3	313	259	incomplete
39#Erwinia_tracheiphila_BHKY	314	260	intact
40#Erwinia_tracheiphila_BuffGH	314	260	intact
39#Erwinia_tracheiphila_BuffGH	315	116	questionable
39#Erwinia_tracheiphila_MDCuke	316	261	questionable
CP013974.1	316	261	-
4#Erwinia_dacicola_IL	317	262	questionable
4#Erwinia_amylovora_3446_1	318	263	incomplete
4#Erwinia_amylovora_E2006P	319	11	intact
4#Erwinia_amylovora_Ea1_00	320	6	incomplete
4#Erwinia_aphidicola_isolate_Bi13	321	264	incomplete
4#Erwinia_phyllosphaerae_CMYE1	322	265	incomplete
4#Erwinia_billingiae_Eb661	323	266	intact
4#Erwinia_billingiae_PBb	324	267	incomplete
4#Erwinia_billingiae_TH88	325	134	incomplete
4#Erwinia_billingiae_isolate_UBA5038	326	268	intact
4#Erwinia_endophytica_A41C3	327	269	incomplete
4#Erwinia_gerundensis_Eg31_2	328	270	intact
4#Erwinia_persicina_B64	329	271	incomplete
4#Erwinia_persicina_CFBP1351100_0	330	272	questionable
4#Erwinia_persicina_CFBP13732_CFBP13732001	331	273	incomplete
4#Erwinia_persicina_CFBP8767_CFBP8767001	331	273	incomplete
4#Erwinia_persicina_CFBP8803_CFBP880301	332	274	incomplete
4#Erwinia_persicina_Cp2	333	42	intact
4#Erwinia_persicina_DOAB1061_DOAB1061	334	275	intact
4#Erwinia_persicina_NBRC_102418_DNA	335	276	intact
4#Erwinia_psidii_IBSBF_435	336	277	intact
4#Erwinia_pyrifoliae_DSM_12163	337	278	incomplete
4#Erwinia_pyrifoliae_Ep1_96	337	278	incomplete
4#Erwinia_pyrifoliae_YKB12328	337	278	incomplete
4#Erwinia_pyrifoliae_EpK1_15	338	278	questionable
4#Erwinia_rhapontici_BIGb0435_Ga0304803	339	279	incomplete
4#Erwinia_rhapontici_CGMCC16978	340	280	intact
6#Erwinia_rhapontici_WS3235_Ga0466830	340	280	intact
4#Erwinia_rhapontici_H1	341	281	intact
4#Erwinia_rhapontici_MAFF_311154	342	282	incomplete
4#Erwinia_rhapontici_WS3235_Ga0466830	343	283	intact
6#Erwinia_rhapontici_CGMCC16978	343	283	incomplete
4#Erwinia_sp_198	344	284	incomplete
4#Erwinia_sp_9145_FA91DRAFT	345	36	incomplete
4#Erwinia_sp_Ejp617	346	285	incomplete
4#Erwinia_sp_ErVv1	347	286	incomplete
4#Erwinia_sp_Leaf53	348	287	incomplete
5#Erwinia_sp_OLMDSP33	349	230	incomplete
5#Erwinia_sp_OAMSP11	349	230	incomplete
4#Erwinia_sp_OLFS4	349	230	incomplete
4#Erwinia_sp_OLMTSP26	349	230	incomplete
7#Erwinia_sp_OLCASP19	350	288	incomplete
7#Erwinia_sp_OLMDSP33	350	288	incomplete
7#Erwinia_sp_OAMSP11	350	288	incomplete
6#Erwinia_sp_OLTSP20	350	288	incomplete
6#Erwinia_sp_OLMTSP26	350	288	incomplete
4#Erwinia_sp_OLSSP12	350	288	incomplete
6#Erwinia_sp_OLFS4	350	288	incomplete
4#Erwinia_sp_QL_Z3	351	289	intact
4#Erwinia_sp_S38	352	290	incomplete
4#Erwinia_toletana_DAPP_PG_735	353	236	incomplete
4#Erwinia_toletana_WS4403_Ga0466831	354	291	incomplete
4#Erwinia_tracheiphila_BHKY	355	292	intact
4#Erwinia_tracheiphila_MDCuke	356	293	questionable
4#Erwinia_tracheiphila_PSU_1	357	96	incomplete
4#Erwinia_tracheiphila_SCR3	358	294	incomplete
4#Erwinia_typographi_M043b	359	295	incomplete
40#Erwinia_tracheiphila_BHKY	360	296	incomplete
40#Erwinia_tracheiphila_MDCuke	361	297	questionable
41#Erwinia_tracheiphila_BuffGH	361	297	questionable
40#Erwinia_tracheiphila_SCR3	362	298	incomplete
41#Erwinia_tracheiphila_SCR3	363	299	questionable
5#Erwinia_dacicola_IL	364	40	incomplete
5#Erwinia_amylovora_Ea6_96	365	15	intact
5#Erwinia_aphidicola_isolate_Bi13	366	300	incomplete
5#Erwinia_phyllosphaerae_CMYE1	367	301	incomplete
5#Erwinia_billingiae_PBb	368	302	intact
5#Erwinia_billingiae_TH88	369	303	incomplete
5#Erwinia_endophytica_A41C3	370	304	incomplete
5#Erwinia_persicina_CFBP8795_CFBP879501	371	305	intact
5#Erwinia_persicina_DOAB1061_DOAB1061	372	306	incomplete
5#Erwinia_psidii_IBSBF_435	373	307	intact
5#Erwinia_pyrifoliae_DSM_12163	374	218	intact
5#Erwinia_pyrifoliae_Ep1_96	374	218	intact
5#Erwinia_rhapontici_BIGb0435_Ga0304803	375	81	intact
5#Erwinia_rhapontici_CGMCC16978	376	308	incomplete
5#Erwinia_rhapontici_WS3235_Ga0466830	376	308	incomplete
5#Erwinia_sp_198	377	309	incomplete
5#Erwinia_sp_ErVv1	378	310	incomplete
5#Erwinia_sp_JH02	379	282	questionable
5#Erwinia_sp_Leaf53	380	311	incomplete
5#Erwinia_sp_OLFS4	381	312	questionable
6#Erwinia_sp_OLSSP12	381	312	questionable
6#Erwinia_sp_OLMDSP33	381	312	questionable
6#Erwinia_sp_OAMSP11	381	312	questionable
5#Erwinia_sp_OLTSP20	381	312	questionable
5#Erwinia_sp_OLCASP19	381	312	questionable
5#Erwinia_sp_OLMTSP26	381	312	questionable
5#Erwinia_sp_QL_Z3	382	313	intact
5#Erwinia_sp_S38	383	314	intact
5#Erwinia_tracheiphila_BHKY	384	253	incomplete
6#Erwinia_tracheiphila_BuffGH	384	253	questionable
5#Erwinia_tracheiphila_BuffGH	385	292	intact
5#Erwinia_tracheiphila_MDCuke	386	315	intact
5#Erwinia_tracheiphila_PSU_1	387	193	incomplete
5#Erwinia_tracheiphila_SCR3	388	315	intact
5#Erwinia_typographi_M043b	389	68	incomplete
6#Erwinia_dacicola_IL	390	137	incomplete
6#Erwinia_aphidicola_isolate_Bi13	391	316	incomplete
6#Erwinia_phyllosphaerae_CMYE1	392	317	questionable
6#Erwinia_billingiae_Eb661	393	318	incomplete
6#Erwinia_billingiae_PBb	394	319	incomplete
6#Erwinia_dacicola_Oroville	395	320	intact
6#Erwinia_endophytica_A41C3	396	321	incomplete
6#Erwinia_persicina_CFBP8795_CFBP879501	397	322	incomplete
6#Erwinia_psidii_IBSBF_435	398	323	incomplete
6#Erwinia_rhapontici_H1	399	49	questionable
6#Erwinia_rhapontici_MAFF_311154	400	324	incomplete
6#Erwinia_sp_ErVv1	401	325	incomplete
6#Erwinia_sp_JH02	402	326	intact
6#Erwinia_sp_Leaf53	403	327	intact
7#Erwinia_sp_OLMTSP26	404	328	intact
6#Erwinia_sp_OLCASP19	404	328	intact
7#Erwinia_sp_OLFS4	404	328	intact
6#Erwinia_sp_QL_Z3	405	329	questionable
6#Erwinia_sp_S38	406	330	intact
6#Erwinia_toletana_WS4403_Ga0466831	407	235	questionable
6#Erwinia_tracheiphila_BHKY	408	331	incomplete
7#Erwinia_tracheiphila_BuffGH	408	331	incomplete
6#Erwinia_tracheiphila_MDCuke	409	332	intact
6#Erwinia_tracheiphila_SCR3	409	332	intact
6#Erwinia_tracheiphila_PSU_1	410	242	questionable
6#Erwinia_typographi_M043b	411	333	incomplete
7#Erwinia_dacicola_IL	412	334	incomplete
7#Erwinia_billingiae_Eb661	413	335	incomplete
7#Erwinia_dacicola_Oroville	414	262	intact
7#Erwinia_endophytica_A41C3	415	336	intact
7#Erwinia_persicina_CFBP1351100_0	416	337	incomplete
7#Erwinia_persicina_CFBP8795_CFBP879501	417	338	incomplete
7#Erwinia_psidii_IBSBF_435	418	339	incomplete
7#Erwinia_pyrifoliae_DSM_12163	419	340	intact
7#Erwinia_pyrifoliae_Ep1_96	419	340	intact
7#Erwinia_rhapontici_WS3235_Ga0466830	420	50	intact
7#Erwinia_sp_ErVv1	421	341	incomplete
7#Erwinia_sp_JH02	422	54	intact
7#Erwinia_sp_S38	423	342	incomplete
7#Erwinia_tracheiphila_BHKY	424	343	intact
8#Erwinia_tracheiphila_BuffGH	424	343	intact
7#Erwinia_tracheiphila_MDCuke	425	344	incomplete
7#Erwinia_tracheiphila_SCR3	425	344	incomplete
7#Erwinia_tracheiphila_PSU_1	426	345	incomplete
7#Erwinia_typographi_M043b	427	346	questionable
8#Erwinia_dacicola_IL	428	347	incomplete
8#Erwinia_billingiae_Eb661	429	348	incomplete
8#Erwinia_dacicola_Oroville	430	349	incomplete
8#Erwinia_endophytica_A41C3	431	350	incomplete
8#Erwinia_persicina_CFBP8795_CFBP879501	432	351	incomplete
8#Erwinia_rhapontici_WS3235_Ga0466830	433	220	questionable
8#Erwinia_sp_JH02	434	352	incomplete
8#Erwinia_sp_OAMSP11	435	328	intact
8#Erwinia_sp_OLCASP19	436	353	incomplete
8#Erwinia_sp_OLMTSP26	436	353	incomplete
8#Erwinia_sp_OLFS4	437	353	incomplete
8#Erwinia_sp_S38	438	354	intact
8#Erwinia_tracheiphila_PSU_1	439	355	incomplete
8#Erwinia_typographi_M043b	440	356	incomplete
9#Erwinia_dacicola_Oroville	441	87	incomplete
9#Erwinia_endophytica_A41C3	442	357	incomplete
9#Erwinia_persicina_CFBP8795_CFBP879501	443	358	incomplete
9#Erwinia_rhapontici_CGMCC16978	444	359	incomplete
9#Erwinia_sp_JH02	445	281	intact
9#Erwinia_sp_OAMSP11	446	360	incomplete
9#Erwinia_sp_S38	447	361	incomplete
9#Erwinia_tracheiphila_MDCuke	448	244	questionable
9#Erwinia_tracheiphila_SCR3	448	244	questionable
9#Erwinia_typographi_M043b	449	362	intact
MF276773.2	450	315	-
