# Supplementary material for: Genomic Analysis Unveils the Pervasiveness and Diversity of Prophages Infecting Erwinia Species
Source: Pathogens. 2022 Dec 27;12(1):44. doi: 10.3390/pathogens12010044 (PMC9866893; doi:10.3390/pathogens12010044)
Supplement: Supplementary file 1 [file pathogens-12-00044-s001.zip › Table_S7 - anteriromente_tabela_1.xlsx]

## Sheet: Planilha1
Table S7. Distribution of CRISPR-Cas systems in Erwinia spp. genomes. The identification and classification of systems were conducted using CRISPRCasFinder v.4.2.20 (Couvin et al. 2018). Only types I-E and I-F were detected.
	Number of genomes	Number of genomes with CRISPR-Cas systems			CRISPR arrays*
		I-E	I-F	I-E and I-F	Maximum	Minimum	Average
Erwinia amylovora	146	146	-	-	8	2	3.3
Erwinia aphidicola	2	-	1	-	3	3	3.0
Erwinia phyllosphaerae	1	-	-	-	na	na	na
Erwinia billingiae	5	-	-	-	na	na	na
Erwinia dacicola	2	-	-	-	na	na	na
Erwinia endophytica	1	1	-	-	2	2	2.0
Erwinia gerundensis	6	-	-	-	na	na	na
Erwinia iniecta	2	-	-	-	na	na	na
Erwinia mallotivora	1	-	1	-	3	3	3.0
Erwinia oleae	1	1	-	-	2	2	2.0
Erwinia persicina	10	-	2	-	2	1	1.5
Erwinia piriflorinigrans	1	-	1	-	2	2	2.0
Erwinia psidii	1	-	1	-	2	2	2.0
Erwinia pyrifoliae	4	-	-	4	4	4	4.0
Erwinia rhapontici	7	-	-	-	na	na	na
Erwinia sp.	22	8	3	-	5	2	2.5
Erwinia tasmaniensis	1	-	1	-	2	2	2.0
Erwinia toletana	2	-	-	-	na	na	na
Erwinia tracheiphila	5	-	-	-	na	na	na
Erwinia typographi	1	-	-	-	na	na	na
-: Cas operon not detected
na: not applicable since Cas operon was not detected
*: only the CRISPR arrays of evidence levels 3 and 4 were considered
