# Supplementary material for: Genomic Analysis Unveils the Pervasiveness and Diversity of Prophages Infecting Erwinia Species
Source: Pathogens. 2022 Dec 27;12(1):44. doi: 10.3390/pathogens12010044 (PMC9866893; doi:10.3390/pathogens12010044)
Supplement: Supplementary file 1 [file pathogens-12-00044-s001.zip › Table_S8 - tabela_suplementar_dados_heatmap_fagos_phaster_vs_erwinia.completeness.xlsx]

## Sheet: tabela_suplementar_dados_heatma
Table S8. CRISPR spacers targeting the prophages. The first column indicate the Erwinia isolates containing CRISPR spacers with significant BLASTn hits (>95% identity and coverage) to the prophages (second column). The prophage completeness provided by PHASTER was included (third column).
Erwinia containing CRISPR spacer	Prophage (protospacer)	Prophage (protospacer) completeness
Erwinia_amylovora_01SFR_BO	1#Erwinia_amylovora_Ea01_03	questionable
Erwinia_amylovora_01SFR_BO	1#Erwinia_amylovora_Ea02_03	intact
Erwinia_amylovora_01SFR_BO	1#Erwinia_amylovora_Ea4_96	questionable
Erwinia_amylovora_01SFR_BO	1#Erwinia_amylovora_Ea8_96	questionable
Erwinia_amylovora_01SFR_BO	2#Erwinia_amylovora_Ea03_03	intact
Erwinia_amylovora_01SFR_BO	2#Erwinia_amylovora_Ea1_95	intact
Erwinia_amylovora_01SFR_BO	2#Erwinia_amylovora_Ea1_98	questionable
Erwinia_amylovora_01SFR_BO	2#Erwinia_amylovora_Ea3_97	questionable
Erwinia_amylovora_01SFR_BO	2#Erwinia_amylovora_Ea7_96	intact
Erwinia_amylovora_01SFR_BO	3#Erwinia_amylovora_Ea04_03	questionable
Erwinia_amylovora_01SFR_BO	3#Erwinia_amylovora_Ea1_00	questionable
Erwinia_amylovora_01SFR_BO	3#Erwinia_amylovora_Ea1_97	questionable
Erwinia_amylovora_01SFR_BO	3#Erwinia_amylovora_Ea2_97	questionable
Erwinia_amylovora_01SFR_BO	4#Erwinia_amylovora_E2006P	intact
Erwinia_amylovora_01SFR_BO	4#Erwinia_amylovora_Ea6_96	questionable
Erwinia_amylovora_01SFR_BO	4#Erwinia_sp_Ejp617	incomplete
Erwinia_amylovora_1_2	1#Erwinia_amylovora_Ea01_03	questionable
Erwinia_amylovora_1_2	1#Erwinia_amylovora_Ea02_03	intact
Erwinia_amylovora_1_2	1#Erwinia_amylovora_Ea3_97	intact
Erwinia_amylovora_1_2	1#Erwinia_amylovora_Ea4_96	questionable
Erwinia_amylovora_1_2	1#Erwinia_amylovora_Ea8_96	questionable
Erwinia_amylovora_1_2	2#Erwinia_amylovora_Ea03_03	intact
Erwinia_amylovora_1_2	2#Erwinia_amylovora_Ea1_95	intact
Erwinia_amylovora_1_2	2#Erwinia_amylovora_Ea1_98	questionable
Erwinia_amylovora_1_2	2#Erwinia_amylovora_Ea2_97	intact
Erwinia_amylovora_1_2	2#Erwinia_amylovora_Ea3_97	questionable
Erwinia_amylovora_1_2	2#Erwinia_amylovora_Ea7_96	intact
Erwinia_amylovora_1_2	3#Erwinia_amylovora_Ea04_03	questionable
Erwinia_amylovora_1_2	3#Erwinia_amylovora_Ea1_00	questionable
Erwinia_amylovora_1_2	3#Erwinia_amylovora_Ea1_97	questionable
Erwinia_amylovora_1_2	3#Erwinia_amylovora_Ea2_97	questionable
Erwinia_amylovora_1_2	3#Erwinia_amylovora_Ea4_96	intact
Erwinia_amylovora_1_2	4#Erwinia_amylovora_E2006P	intact
Erwinia_amylovora_1_2	4#Erwinia_amylovora_Ea6_96	questionable
Erwinia_amylovora_1_2	4#Erwinia_sp_Ejp617	incomplete
Erwinia_amylovora_11_7	1#Erwinia_amylovora_Ea01_03	questionable
Erwinia_amylovora_11_7	1#Erwinia_amylovora_Ea02_03	intact
Erwinia_amylovora_11_7	1#Erwinia_amylovora_Ea3_97	intact
Erwinia_amylovora_11_7	1#Erwinia_amylovora_Ea4_96	questionable
Erwinia_amylovora_11_7	1#Erwinia_amylovora_Ea8_96	questionable
Erwinia_amylovora_11_7	2#Erwinia_amylovora_Ea03_03	intact
Erwinia_amylovora_11_7	2#Erwinia_amylovora_Ea1_95	intact
Erwinia_amylovora_11_7	2#Erwinia_amylovora_Ea1_98	questionable
Erwinia_amylovora_11_7	2#Erwinia_amylovora_Ea2_97	intact
Erwinia_amylovora_11_7	2#Erwinia_amylovora_Ea3_97	questionable
Erwinia_amylovora_11_7	2#Erwinia_amylovora_Ea7_96	intact
Erwinia_amylovora_11_7	3#Erwinia_amylovora_Ea04_03	questionable
Erwinia_amylovora_11_7	3#Erwinia_amylovora_Ea1_00	questionable
Erwinia_amylovora_11_7	3#Erwinia_amylovora_Ea1_97	questionable
Erwinia_amylovora_11_7	3#Erwinia_amylovora_Ea2_97	questionable
Erwinia_amylovora_11_7	3#Erwinia_amylovora_Ea4_96	intact
Erwinia_amylovora_11_7	4#Erwinia_amylovora_E2006P	intact
Erwinia_amylovora_11_7	4#Erwinia_amylovora_Ea6_96	questionable
Erwinia_amylovora_11_7	4#Erwinia_sp_Ejp617	incomplete
Erwinia_amylovora_1279	1#Erwinia_amylovora_Ea01_03	questionable
Erwinia_amylovora_1279	1#Erwinia_amylovora_Ea02_03	intact
Erwinia_amylovora_1279	1#Erwinia_amylovora_Ea4_96	questionable
Erwinia_amylovora_1279	1#Erwinia_amylovora_Ea8_96	questionable
Erwinia_amylovora_1279	2#Erwinia_amylovora_Ea03_03	intact
Erwinia_amylovora_1279	2#Erwinia_amylovora_Ea1_95	intact
Erwinia_amylovora_1279	2#Erwinia_amylovora_Ea1_98	questionable
Erwinia_amylovora_1279	2#Erwinia_amylovora_Ea3_97	questionable
Erwinia_amylovora_1279	2#Erwinia_amylovora_Ea7_96	intact
Erwinia_amylovora_1279	3#Erwinia_amylovora_Ea04_03	questionable
Erwinia_amylovora_1279	3#Erwinia_amylovora_Ea1_00	questionable
Erwinia_amylovora_1279	3#Erwinia_amylovora_Ea1_97	questionable
Erwinia_amylovora_1279	3#Erwinia_amylovora_Ea2_97	questionable
Erwinia_amylovora_1279	4#Erwinia_amylovora_E2006P	intact
Erwinia_amylovora_1279	4#Erwinia_amylovora_Ea6_96	questionable
Erwinia_amylovora_1279	4#Erwinia_sp_Ejp617	incomplete
Erwinia_amylovora_1280	1#Erwinia_amylovora_Ea01_03	questionable
Erwinia_amylovora_1280	1#Erwinia_amylovora_Ea02_03	intact
Erwinia_amylovora_1280	1#Erwinia_amylovora_Ea3_97	intact
Erwinia_amylovora_1280	1#Erwinia_amylovora_Ea4_96	questionable
Erwinia_amylovora_1280	1#Erwinia_amylovora_Ea8_96	questionable
Erwinia_amylovora_1280	2#Erwinia_amylovora_Ea03_03	intact
Erwinia_amylovora_1280	2#Erwinia_amylovora_Ea1_95	intact
Erwinia_amylovora_1280	2#Erwinia_amylovora_Ea1_98	questionable
Erwinia_amylovora_1280	2#Erwinia_amylovora_Ea2_97	intact
Erwinia_amylovora_1280	2#Erwinia_amylovora_Ea3_97	questionable
Erwinia_amylovora_1280	2#Erwinia_amylovora_Ea7_96	intact
Erwinia_amylovora_1280	3#Erwinia_amylovora_Ea04_03	questionable
Erwinia_amylovora_1280	3#Erwinia_amylovora_Ea1_00	questionable
Erwinia_amylovora_1280	3#Erwinia_amylovora_Ea1_97	questionable
Erwinia_amylovora_1280	3#Erwinia_amylovora_Ea2_97	questionable
Erwinia_amylovora_1280	3#Erwinia_amylovora_Ea4_96	intact
Erwinia_amylovora_1280	4#Erwinia_amylovora_E2006P	intact
Erwinia_amylovora_1280	4#Erwinia_amylovora_Ea6_96	questionable
Erwinia_amylovora_1280	4#Erwinia_sp_Ejp617	incomplete
Erwinia_amylovora_1400_1	1#Erwinia_amylovora_Ea01_03	questionable
Erwinia_amylovora_1400_1	1#Erwinia_amylovora_Ea02_03	intact
Erwinia_amylovora_1400_1	1#Erwinia_amylovora_Ea4_96	questionable
Erwinia_amylovora_1400_1	1#Erwinia_amylovora_Ea8_96	questionable
Erwinia_amylovora_1400_1	2#Erwinia_amylovora_Ea03_03	intact
Erwinia_amylovora_1400_1	2#Erwinia_amylovora_Ea1_95	intact
Erwinia_amylovora_1400_1	2#Erwinia_amylovora_Ea1_98	questionable
Erwinia_amylovora_1400_1	2#Erwinia_amylovora_Ea3_97	questionable
Erwinia_amylovora_1400_1	2#Erwinia_amylovora_Ea7_96	intact
Erwinia_amylovora_1400_1	3#Erwinia_amylovora_Ea04_03	questionable
Erwinia_amylovora_1400_1	3#Erwinia_amylovora_Ea1_00	questionable
Erwinia_amylovora_1400_1	3#Erwinia_amylovora_Ea1_97	questionable
Erwinia_amylovora_1400_1	3#Erwinia_amylovora_Ea2_97	questionable
Erwinia_amylovora_1400_1	4#Erwinia_amylovora_E2006P	intact
Erwinia_amylovora_1400_1	4#Erwinia_amylovora_Ea6_96	questionable
Erwinia_amylovora_1400_1	4#Erwinia_sp_Ejp617	incomplete
Erwinia_amylovora_1400_2	1#Erwinia_amylovora_Ea01_03	questionable
Erwinia_amylovora_1400_2	1#Erwinia_amylovora_Ea02_03	intact
Erwinia_amylovora_1400_2	1#Erwinia_amylovora_Ea4_96	questionable
Erwinia_amylovora_1400_2	1#Erwinia_amylovora_Ea8_96	questionable
Erwinia_amylovora_1400_2	2#Erwinia_amylovora_Ea03_03	intact
Erwinia_amylovora_1400_2	2#Erwinia_amylovora_Ea1_95	intact
Erwinia_amylovora_1400_2	2#Erwinia_amylovora_Ea1_98	questionable
Erwinia_amylovora_1400_2	2#Erwinia_amylovora_Ea3_97	questionable
Erwinia_amylovora_1400_2	2#Erwinia_amylovora_Ea7_96	intact
Erwinia_amylovora_1400_2	3#Erwinia_amylovora_Ea04_03	questionable
Erwinia_amylovora_1400_2	3#Erwinia_amylovora_Ea1_00	questionable
Erwinia_amylovora_1400_2	3#Erwinia_amylovora_Ea1_97	questionable
Erwinia_amylovora_1400_2	3#Erwinia_amylovora_Ea2_97	questionable
Erwinia_amylovora_1400_2	3#Erwinia_billingiae_isolate_UBA5038	intact
Erwinia_amylovora_1400_2	4#Erwinia_amylovora_E2006P	intact
Erwinia_amylovora_1400_2	4#Erwinia_amylovora_Ea6_96	questionable
Erwinia_amylovora_1400_2	4#Erwinia_sp_Ejp617	incomplete
Erwinia_amylovora_1476	1#Erwinia_amylovora_Ea01_03	questionable
Erwinia_amylovora_1476	1#Erwinia_amylovora_Ea02_03	intact
Erwinia_amylovora_1476	1#Erwinia_amylovora_Ea4_96	questionable
Erwinia_amylovora_1476	1#Erwinia_amylovora_Ea8_96	questionable
Erwinia_amylovora_1476	2#Erwinia_amylovora_Ea03_03	intact
Erwinia_amylovora_1476	2#Erwinia_amylovora_Ea1_95	intact
Erwinia_amylovora_1476	2#Erwinia_amylovora_Ea1_98	questionable
Erwinia_amylovora_1476	2#Erwinia_amylovora_Ea3_97	questionable
Erwinia_amylovora_1476	2#Erwinia_amylovora_Ea7_96	intact
Erwinia_amylovora_1476	3#Erwinia_amylovora_Ea04_03	questionable
Erwinia_amylovora_1476	3#Erwinia_amylovora_Ea1_00	questionable
Erwinia_amylovora_1476	3#Erwinia_amylovora_Ea1_97	questionable
Erwinia_amylovora_1476	3#Erwinia_amylovora_Ea2_97	questionable
Erwinia_amylovora_1476	4#Erwinia_amylovora_E2006P	intact
Erwinia_amylovora_1476	4#Erwinia_amylovora_Ea6_96	questionable
Erwinia_amylovora_1476	4#Erwinia_sp_Ejp617	incomplete
Erwinia_amylovora_1477_1	1#Erwinia_amylovora_Ea01_03	questionable
Erwinia_amylovora_1477_1	1#Erwinia_amylovora_Ea02_03	intact
Erwinia_amylovora_1477_1	1#Erwinia_amylovora_Ea4_96	questionable
Erwinia_amylovora_1477_1	1#Erwinia_amylovora_Ea8_96	questionable
Erwinia_amylovora_1477_1	2#Erwinia_amylovora_Ea03_03	intact
Erwinia_amylovora_1477_1	2#Erwinia_amylovora_Ea1_95	intact
Erwinia_amylovora_1477_1	2#Erwinia_amylovora_Ea1_98	questionable
Erwinia_amylovora_1477_1	2#Erwinia_amylovora_Ea3_97	questionable
Erwinia_amylovora_1477_1	2#Erwinia_amylovora_Ea7_96	intact
Erwinia_amylovora_1477_1	3#Erwinia_amylovora_Ea04_03	questionable
Erwinia_amylovora_1477_1	3#Erwinia_amylovora_Ea1_00	questionable
Erwinia_amylovora_1477_1	3#Erwinia_amylovora_Ea1_97	questionable
Erwinia_amylovora_1477_1	3#Erwinia_amylovora_Ea2_97	questionable
Erwinia_amylovora_1477_1	4#Erwinia_amylovora_E2006P	intact
Erwinia_amylovora_1477_1	4#Erwinia_amylovora_Ea6_96	questionable
Erwinia_amylovora_1477_1	4#Erwinia_sp_Ejp617	incomplete
Erwinia_amylovora_1478_2	1#Erwinia_amylovora_Ea01_03	questionable
Erwinia_amylovora_1478_2	1#Erwinia_amylovora_Ea02_03	intact
Erwinia_amylovora_1478_2	1#Erwinia_amylovora_Ea3_97	intact
Erwinia_amylovora_1478_2	1#Erwinia_amylovora_Ea4_96	questionable
Erwinia_amylovora_1478_2	1#Erwinia_amylovora_Ea8_96	questionable
Erwinia_amylovora_1478_2	2#Erwinia_amylovora_Ea03_03	intact
Erwinia_amylovora_1478_2	2#Erwinia_amylovora_Ea1_95	intact
Erwinia_amylovora_1478_2	2#Erwinia_amylovora_Ea1_98	questionable
Erwinia_amylovora_1478_2	2#Erwinia_amylovora_Ea2_97	intact
Erwinia_amylovora_1478_2	2#Erwinia_amylovora_Ea3_97	questionable
Erwinia_amylovora_1478_2	2#Erwinia_amylovora_Ea7_96	intact
Erwinia_amylovora_1478_2	3#Erwinia_amylovora_Ea04_03	questionable
Erwinia_amylovora_1478_2	3#Erwinia_amylovora_Ea1_00	questionable
Erwinia_amylovora_1478_2	3#Erwinia_amylovora_Ea1_97	questionable
Erwinia_amylovora_1478_2	3#Erwinia_amylovora_Ea2_97	questionable
Erwinia_amylovora_1478_2	3#Erwinia_amylovora_Ea4_96	intact
Erwinia_amylovora_1478_2	4#Erwinia_amylovora_E2006P	intact
Erwinia_amylovora_1478_2	4#Erwinia_amylovora_Ea6_96	questionable
Erwinia_amylovora_1478_2	4#Erwinia_sp_Ejp617	incomplete
Erwinia_amylovora_1480_3	1#Erwinia_amylovora_Ea01_03	questionable
Erwinia_amylovora_1480_3	1#Erwinia_amylovora_Ea02_03	intact
Erwinia_amylovora_1480_3	1#Erwinia_amylovora_Ea4_96	questionable
Erwinia_amylovora_1480_3	1#Erwinia_amylovora_Ea8_96	questionable
Erwinia_amylovora_1480_3	2#Erwinia_amylovora_Ea03_03	intact
Erwinia_amylovora_1480_3	2#Erwinia_amylovora_Ea1_95	intact
Erwinia_amylovora_1480_3	2#Erwinia_amylovora_Ea1_98	questionable
Erwinia_amylovora_1480_3	2#Erwinia_amylovora_Ea3_97	questionable
Erwinia_amylovora_1480_3	2#Erwinia_amylovora_Ea7_96	intact
Erwinia_amylovora_1480_3	3#Erwinia_amylovora_Ea04_03	questionable
Erwinia_amylovora_1480_3	3#Erwinia_amylovora_Ea1_00	questionable
Erwinia_amylovora_1480_3	3#Erwinia_amylovora_Ea1_97	questionable
Erwinia_amylovora_1480_3	3#Erwinia_amylovora_Ea2_97	questionable
Erwinia_amylovora_1480_3	4#Erwinia_amylovora_E2006P	intact
Erwinia_amylovora_1480_3	4#Erwinia_amylovora_Ea6_96	questionable
Erwinia_amylovora_1480_3	4#Erwinia_sp_Ejp617	incomplete
Erwinia_amylovora_1482	1#Erwinia_amylovora_Ea01_03	questionable
Erwinia_amylovora_1482	1#Erwinia_amylovora_Ea02_03	intact
Erwinia_amylovora_1482	1#Erwinia_amylovora_Ea3_97	intact
Erwinia_amylovora_1482	1#Erwinia_amylovora_Ea4_96	questionable
Erwinia_amylovora_1482	1#Erwinia_amylovora_Ea8_96	questionable
Erwinia_amylovora_1482	2#Erwinia_amylovora_Ea03_03	intact
Erwinia_amylovora_1482	2#Erwinia_amylovora_Ea1_95	intact
Erwinia_amylovora_1482	2#Erwinia_amylovora_Ea1_98	questionable
Erwinia_amylovora_1482	2#Erwinia_amylovora_Ea2_97	intact
Erwinia_amylovora_1482	2#Erwinia_amylovora_Ea3_97	questionable
Erwinia_amylovora_1482	2#Erwinia_amylovora_Ea7_96	intact
Erwinia_amylovora_1482	3#Erwinia_amylovora_Ea04_03	questionable
Erwinia_amylovora_1482	3#Erwinia_amylovora_Ea1_00	questionable
Erwinia_amylovora_1482	3#Erwinia_amylovora_Ea1_97	questionable
Erwinia_amylovora_1482	3#Erwinia_amylovora_Ea2_97	questionable
Erwinia_amylovora_1482	3#Erwinia_amylovora_Ea4_96	intact
Erwinia_amylovora_1482	4#Erwinia_amylovora_E2006P	intact
Erwinia_amylovora_1482	4#Erwinia_amylovora_Ea6_96	questionable
Erwinia_amylovora_1482	4#Erwinia_sp_Ejp617	incomplete
Erwinia_amylovora_1486	1#Erwinia_amylovora_Ea01_03	questionable
Erwinia_amylovora_1486	1#Erwinia_amylovora_Ea02_03	intact
Erwinia_amylovora_1486	1#Erwinia_amylovora_Ea3_97	intact
Erwinia_amylovora_1486	1#Erwinia_amylovora_Ea4_96	questionable
Erwinia_amylovora_1486	1#Erwinia_amylovora_Ea8_96	questionable
Erwinia_amylovora_1486	2#Erwinia_amylovora_Ea03_03	intact
Erwinia_amylovora_1486	2#Erwinia_amylovora_Ea1_95	intact
Erwinia_amylovora_1486	2#Erwinia_amylovora_Ea1_98	questionable
Erwinia_amylovora_1486	2#Erwinia_amylovora_Ea2_97	intact
Erwinia_amylovora_1486	2#Erwinia_amylovora_Ea3_97	questionable
Erwinia_amylovora_1486	2#Erwinia_amylovora_Ea7_96	intact
Erwinia_amylovora_1486	3#Erwinia_amylovora_Ea04_03	questionable
Erwinia_amylovora_1486	3#Erwinia_amylovora_Ea1_00	questionable
Erwinia_amylovora_1486	3#Erwinia_amylovora_Ea1_97	questionable
Erwinia_amylovora_1486	3#Erwinia_amylovora_Ea2_97	questionable
Erwinia_amylovora_1486	3#Erwinia_amylovora_Ea4_96	intact
Erwinia_amylovora_1486	4#Erwinia_amylovora_E2006P	intact
Erwinia_amylovora_1486	4#Erwinia_amylovora_Ea6_96	questionable
Erwinia_amylovora_1486	4#Erwinia_sp_Ejp617	incomplete
Erwinia_amylovora_1581	1#Erwinia_amylovora_Ea01_03	questionable
Erwinia_amylovora_1581	1#Erwinia_amylovora_Ea02_03	intact
Erwinia_amylovora_1581	1#Erwinia_amylovora_Ea3_97	intact
Erwinia_amylovora_1581	1#Erwinia_amylovora_Ea4_96	questionable
Erwinia_amylovora_1581	1#Erwinia_amylovora_Ea8_96	questionable
Erwinia_amylovora_1581	2#Erwinia_amylovora_Ea03_03	intact
Erwinia_amylovora_1581	2#Erwinia_amylovora_Ea1_95	intact
Erwinia_amylovora_1581	2#Erwinia_amylovora_Ea1_98	questionable
Erwinia_amylovora_1581	2#Erwinia_amylovora_Ea2_97	intact
Erwinia_amylovora_1581	2#Erwinia_amylovora_Ea3_97	questionable
Erwinia_amylovora_1581	2#Erwinia_amylovora_Ea7_96	intact
Erwinia_amylovora_1581	3#Erwinia_amylovora_Ea04_03	questionable
Erwinia_amylovora_1581	3#Erwinia_amylovora_Ea1_00	questionable
Erwinia_amylovora_1581	3#Erwinia_amylovora_Ea1_97	questionable
Erwinia_amylovora_1581	3#Erwinia_amylovora_Ea2_97	questionable
Erwinia_amylovora_1581	3#Erwinia_amylovora_Ea4_96	intact
Erwinia_amylovora_1581	4#Erwinia_amylovora_E2006P	intact
Erwinia_amylovora_1581	4#Erwinia_amylovora_Ea6_96	questionable
Erwinia_amylovora_1581	4#Erwinia_sp_Ejp617	incomplete
Erwinia_amylovora_1598	1#Erwinia_amylovora_Ea3_97	intact
Erwinia_amylovora_1598	2#Erwinia_amylovora_Ea2_97	intact
Erwinia_amylovora_1598	3#Erwinia_amylovora_Ea4_96	intact
Erwinia_amylovora_1602	1#Erwinia_amylovora_Ea3_97	intact
Erwinia_amylovora_1602	2#Erwinia_amylovora_Ea2_97	intact
Erwinia_amylovora_1602	3#Erwinia_amylovora_Ea4_96	intact
Erwinia_amylovora_1609	1#Erwinia_amylovora_Ea3_97	intact
Erwinia_amylovora_1609	2#Erwinia_amylovora_Ea2_97	intact
Erwinia_amylovora_1609	3#Erwinia_amylovora_Ea4_96	intact
Erwinia_amylovora_1611_BCEa29	1#Erwinia_amylovora_Ea01_03	questionable
Erwinia_amylovora_1611_BCEa29	1#Erwinia_amylovora_Ea02_03	intact
Erwinia_amylovora_1611_BCEa29	1#Erwinia_amylovora_Ea4_96	questionable
Erwinia_amylovora_1611_BCEa29	1#Erwinia_amylovora_Ea8_96	questionable
Erwinia_amylovora_1611_BCEa29	2#Erwinia_amylovora_Ea03_03	intact
Erwinia_amylovora_1611_BCEa29	2#Erwinia_amylovora_Ea1_95	intact
Erwinia_amylovora_1611_BCEa29	2#Erwinia_amylovora_Ea1_98	questionable
Erwinia_amylovora_1611_BCEa29	2#Erwinia_amylovora_Ea3_97	questionable
Erwinia_amylovora_1611_BCEa29	2#Erwinia_amylovora_Ea7_96	intact
Erwinia_amylovora_1611_BCEa29	3#Erwinia_amylovora_Ea04_03	questionable
Erwinia_amylovora_1611_BCEa29	3#Erwinia_amylovora_Ea1_00	questionable
Erwinia_amylovora_1611_BCEa29	3#Erwinia_amylovora_Ea1_97	questionable
Erwinia_amylovora_1611_BCEa29	3#Erwinia_amylovora_Ea2_97	questionable
Erwinia_amylovora_1611_BCEa29	4#Erwinia_amylovora_E2006P	intact
Erwinia_amylovora_1611_BCEa29	4#Erwinia_amylovora_Ea6_96	questionable
Erwinia_amylovora_1611_BCEa29	4#Erwinia_sp_Ejp617	incomplete
Erwinia_amylovora_1612	1#Erwinia_amylovora_Ea3_97	intact
Erwinia_amylovora_1612	2#Erwinia_amylovora_Ea2_97	intact
Erwinia_amylovora_1612	3#Erwinia_amylovora_Ea4_96	intact
Erwinia_amylovora_1617	1#Erwinia_amylovora_Ea01_03	questionable
Erwinia_amylovora_1617	1#Erwinia_amylovora_Ea02_03	intact
Erwinia_amylovora_1617	1#Erwinia_amylovora_Ea3_97	intact
Erwinia_amylovora_1617	1#Erwinia_amylovora_Ea4_96	questionable
Erwinia_amylovora_1617	1#Erwinia_amylovora_Ea8_96	questionable
Erwinia_amylovora_1617	2#Erwinia_amylovora_Ea03_03	intact
Erwinia_amylovora_1617	2#Erwinia_amylovora_Ea1_95	intact
Erwinia_amylovora_1617	2#Erwinia_amylovora_Ea1_98	questionable
Erwinia_amylovora_1617	2#Erwinia_amylovora_Ea2_97	intact
Erwinia_amylovora_1617	2#Erwinia_amylovora_Ea3_97	questionable
Erwinia_amylovora_1617	2#Erwinia_amylovora_Ea7_96	intact
Erwinia_amylovora_1617	3#Erwinia_amylovora_Ea04_03	questionable
Erwinia_amylovora_1617	3#Erwinia_amylovora_Ea1_00	questionable
Erwinia_amylovora_1617	3#Erwinia_amylovora_Ea1_97	questionable
Erwinia_amylovora_1617	3#Erwinia_amylovora_Ea2_97	questionable
Erwinia_amylovora_1617	3#Erwinia_amylovora_Ea4_96	intact
Erwinia_amylovora_1617	4#Erwinia_amylovora_E2006P	intact
Erwinia_amylovora_1617	4#Erwinia_amylovora_Ea6_96	questionable
Erwinia_amylovora_1617	4#Erwinia_sp_Ejp617	incomplete
Erwinia_amylovora_1619	1#Erwinia_amylovora_Ea01_03	questionable
Erwinia_amylovora_1619	1#Erwinia_amylovora_Ea02_03	intact
Erwinia_amylovora_1619	1#Erwinia_amylovora_Ea3_97	intact
Erwinia_amylovora_1619	1#Erwinia_amylovora_Ea4_96	questionable
Erwinia_amylovora_1619	1#Erwinia_amylovora_Ea8_96	questionable
Erwinia_amylovora_1619	2#Erwinia_amylovora_Ea03_03	intact
Erwinia_amylovora_1619	2#Erwinia_amylovora_Ea1_95	intact
Erwinia_amylovora_1619	2#Erwinia_amylovora_Ea1_98	questionable
Erwinia_amylovora_1619	2#Erwinia_amylovora_Ea2_97	intact
Erwinia_amylovora_1619	2#Erwinia_amylovora_Ea3_97	questionable
Erwinia_amylovora_1619	2#Erwinia_amylovora_Ea7_96	intact
Erwinia_amylovora_1619	3#Erwinia_amylovora_Ea04_03	questionable
Erwinia_amylovora_1619	3#Erwinia_amylovora_Ea1_00	questionable
Erwinia_amylovora_1619	3#Erwinia_amylovora_Ea1_97	questionable
Erwinia_amylovora_1619	3#Erwinia_amylovora_Ea2_97	questionable
Erwinia_amylovora_1619	3#Erwinia_amylovora_Ea4_96	intact
Erwinia_amylovora_1619	4#Erwinia_amylovora_E2006P	intact
Erwinia_amylovora_1619	4#Erwinia_amylovora_Ea6_96	questionable
Erwinia_amylovora_1619	4#Erwinia_sp_Ejp617	incomplete
Erwinia_amylovora_1668	1#Erwinia_amylovora_Ea01_03	questionable
Erwinia_amylovora_1668	1#Erwinia_amylovora_Ea02_03	intact
Erwinia_amylovora_1668	1#Erwinia_amylovora_Ea4_96	questionable
Erwinia_amylovora_1668	1#Erwinia_amylovora_Ea8_96	questionable
Erwinia_amylovora_1668	2#Erwinia_amylovora_Ea03_03	intact
Erwinia_amylovora_1668	2#Erwinia_amylovora_Ea1_95	intact
Erwinia_amylovora_1668	2#Erwinia_amylovora_Ea1_98	questionable
Erwinia_amylovora_1668	2#Erwinia_amylovora_Ea3_97	questionable
Erwinia_amylovora_1668	2#Erwinia_amylovora_Ea7_96	intact
Erwinia_amylovora_1668	3#Erwinia_amylovora_Ea04_03	questionable
Erwinia_amylovora_1668	3#Erwinia_amylovora_Ea1_00	questionable
Erwinia_amylovora_1668	3#Erwinia_amylovora_Ea1_97	questionable
Erwinia_amylovora_1668	3#Erwinia_amylovora_Ea2_97	questionable
Erwinia_amylovora_1668	4#Erwinia_amylovora_E2006P	intact
Erwinia_amylovora_1668	4#Erwinia_amylovora_Ea6_96	questionable
Erwinia_amylovora_1668	4#Erwinia_sp_Ejp617	incomplete
Erwinia_amylovora_1680	1#Erwinia_amylovora_Ea01_03	questionable
Erwinia_amylovora_1680	1#Erwinia_amylovora_Ea02_03	intact
Erwinia_amylovora_1680	1#Erwinia_amylovora_Ea4_96	questionable
Erwinia_amylovora_1680	1#Erwinia_amylovora_Ea8_96	questionable
Erwinia_amylovora_1680	2#Erwinia_amylovora_Ea03_03	intact
Erwinia_amylovora_1680	2#Erwinia_amylovora_Ea1_95	intact
Erwinia_amylovora_1680	2#Erwinia_amylovora_Ea1_98	questionable
Erwinia_amylovora_1680	2#Erwinia_amylovora_Ea3_97	questionable
Erwinia_amylovora_1680	2#Erwinia_amylovora_Ea7_96	intact
Erwinia_amylovora_1680	3#Erwinia_amylovora_Ea04_03	questionable
Erwinia_amylovora_1680	3#Erwinia_amylovora_Ea1_00	questionable
Erwinia_amylovora_1680	3#Erwinia_amylovora_Ea1_97	questionable
Erwinia_amylovora_1680	3#Erwinia_amylovora_Ea2_97	questionable
Erwinia_amylovora_1680	4#Erwinia_amylovora_E2006P	intact
Erwinia_amylovora_1680	4#Erwinia_amylovora_Ea6_96	questionable
Erwinia_amylovora_1680	4#Erwinia_sp_Ejp617	incomplete
Erwinia_amylovora_1686	1#Erwinia_amylovora_Ea01_03	questionable
Erwinia_amylovora_1686	1#Erwinia_amylovora_Ea02_03	intact
Erwinia_amylovora_1686	1#Erwinia_amylovora_Ea4_96	questionable
Erwinia_amylovora_1686	1#Erwinia_amylovora_Ea8_96	questionable
Erwinia_amylovora_1686	2#Erwinia_amylovora_Ea03_03	intact
Erwinia_amylovora_1686	2#Erwinia_amylovora_Ea1_95	intact
Erwinia_amylovora_1686	2#Erwinia_amylovora_Ea1_98	questionable
Erwinia_amylovora_1686	2#Erwinia_amylovora_Ea3_97	questionable
Erwinia_amylovora_1686	2#Erwinia_amylovora_Ea7_96	intact
Erwinia_amylovora_1686	3#Erwinia_amylovora_Ea04_03	questionable
Erwinia_amylovora_1686	3#Erwinia_amylovora_Ea1_00	questionable
Erwinia_amylovora_1686	3#Erwinia_amylovora_Ea1_97	questionable
Erwinia_amylovora_1686	3#Erwinia_amylovora_Ea2_97	questionable
Erwinia_amylovora_1686	4#Erwinia_amylovora_E2006P	intact
Erwinia_amylovora_1686	4#Erwinia_amylovora_Ea6_96	questionable
Erwinia_amylovora_1686	4#Erwinia_sp_Ejp617	incomplete
Erwinia_amylovora_17_2187	1#Erwinia_amylovora_Ea01_03	questionable
Erwinia_amylovora_17_2187	1#Erwinia_amylovora_Ea02_03	intact
Erwinia_amylovora_17_2187	1#Erwinia_amylovora_Ea4_96	questionable
Erwinia_amylovora_17_2187	1#Erwinia_amylovora_Ea8_96	questionable
Erwinia_amylovora_17_2187	2#Erwinia_amylovora_Ea03_03	intact
Erwinia_amylovora_17_2187	2#Erwinia_amylovora_Ea1_95	intact
Erwinia_amylovora_17_2187	2#Erwinia_amylovora_Ea1_98	questionable
Erwinia_amylovora_17_2187	2#Erwinia_amylovora_Ea3_97	questionable
Erwinia_amylovora_17_2187	2#Erwinia_amylovora_Ea7_96	intact
Erwinia_amylovora_17_2187	3#Erwinia_amylovora_Ea04_03	questionable
Erwinia_amylovora_17_2187	3#Erwinia_amylovora_Ea1_00	questionable
Erwinia_amylovora_17_2187	3#Erwinia_amylovora_Ea1_97	questionable
Erwinia_amylovora_17_2187	3#Erwinia_amylovora_Ea2_97	questionable
Erwinia_amylovora_17_2187	4#Erwinia_amylovora_E2006P	intact
Erwinia_amylovora_17_2187	4#Erwinia_amylovora_Ea6_96	questionable
Erwinia_amylovora_17_2187	4#Erwinia_sp_Ejp617	incomplete
Erwinia_amylovora_20060013	1#Erwinia_amylovora_Ea01_03	questionable
Erwinia_amylovora_20060013	1#Erwinia_amylovora_Ea02_03	intact
Erwinia_amylovora_20060013	1#Erwinia_amylovora_Ea3_97	intact
Erwinia_amylovora_20060013	1#Erwinia_amylovora_Ea4_96	questionable
Erwinia_amylovora_20060013	1#Erwinia_amylovora_Ea8_96	questionable
Erwinia_amylovora_20060013	2#Erwinia_amylovora_Ea03_03	intact
Erwinia_amylovora_20060013	2#Erwinia_amylovora_Ea1_95	intact
Erwinia_amylovora_20060013	2#Erwinia_amylovora_Ea1_98	questionable
Erwinia_amylovora_20060013	2#Erwinia_amylovora_Ea2_97	intact
Erwinia_amylovora_20060013	2#Erwinia_amylovora_Ea3_97	questionable
Erwinia_amylovora_20060013	2#Erwinia_amylovora_Ea7_96	intact
Erwinia_amylovora_20060013	3#Erwinia_amylovora_Ea04_03	questionable
Erwinia_amylovora_20060013	3#Erwinia_amylovora_Ea1_00	questionable
Erwinia_amylovora_20060013	3#Erwinia_amylovora_Ea1_97	questionable
Erwinia_amylovora_20060013	3#Erwinia_amylovora_Ea2_97	questionable
Erwinia_amylovora_20060013	3#Erwinia_amylovora_Ea4_96	intact
Erwinia_amylovora_20060013	4#Erwinia_amylovora_E2006P	intact
Erwinia_amylovora_20060013	4#Erwinia_amylovora_Ea6_96	questionable
Erwinia_amylovora_20060013	4#Erwinia_sp_Ejp617	incomplete
Erwinia_amylovora_20070126	1#Erwinia_amylovora_Ea01_03	questionable
Erwinia_amylovora_20070126	1#Erwinia_amylovora_Ea02_03	intact
Erwinia_amylovora_20070126	1#Erwinia_amylovora_Ea4_96	questionable
Erwinia_amylovora_20070126	1#Erwinia_amylovora_Ea8_96	questionable
Erwinia_amylovora_20070126	2#Erwinia_amylovora_Ea03_03	intact
Erwinia_amylovora_20070126	2#Erwinia_amylovora_Ea1_95	intact
Erwinia_amylovora_20070126	2#Erwinia_amylovora_Ea1_98	questionable
Erwinia_amylovora_20070126	2#Erwinia_amylovora_Ea3_97	questionable
Erwinia_amylovora_20070126	2#Erwinia_amylovora_Ea7_96	intact
Erwinia_amylovora_20070126	3#Erwinia_amylovora_Ea04_03	questionable
Erwinia_amylovora_20070126	3#Erwinia_amylovora_Ea1_00	questionable
Erwinia_amylovora_20070126	3#Erwinia_amylovora_Ea1_97	questionable
Erwinia_amylovora_20070126	3#Erwinia_amylovora_Ea2_97	questionable
Erwinia_amylovora_20070126	4#Erwinia_amylovora_E2006P	intact
Erwinia_amylovora_20070126	4#Erwinia_amylovora_Ea6_96	questionable
Erwinia_amylovora_20070126	4#Erwinia_sp_Ejp617	incomplete
Erwinia_amylovora_20070245	1#Erwinia_amylovora_Ea01_03	questionable
Erwinia_amylovora_20070245	1#Erwinia_amylovora_Ea02_03	intact
Erwinia_amylovora_20070245	1#Erwinia_amylovora_Ea4_96	questionable
Erwinia_amylovora_20070245	1#Erwinia_amylovora_Ea8_96	questionable
Erwinia_amylovora_20070245	2#Erwinia_amylovora_Ea03_03	intact
Erwinia_amylovora_20070245	2#Erwinia_amylovora_Ea1_95	intact
Erwinia_amylovora_20070245	2#Erwinia_amylovora_Ea1_98	questionable
Erwinia_amylovora_20070245	2#Erwinia_amylovora_Ea3_97	questionable
Erwinia_amylovora_20070245	2#Erwinia_amylovora_Ea7_96	intact
Erwinia_amylovora_20070245	3#Erwinia_amylovora_Ea04_03	questionable
Erwinia_amylovora_20070245	3#Erwinia_amylovora_Ea1_00	questionable
Erwinia_amylovora_20070245	3#Erwinia_amylovora_Ea1_97	questionable
Erwinia_amylovora_20070245	3#Erwinia_amylovora_Ea2_97	questionable
Erwinia_amylovora_20070245	4#Erwinia_amylovora_E2006P	intact
Erwinia_amylovora_20070245	4#Erwinia_amylovora_Ea6_96	questionable
Erwinia_amylovora_20070245	4#Erwinia_sp_Ejp617	incomplete
Erwinia_amylovora_20070270	1#Erwinia_amylovora_Ea01_03	questionable
Erwinia_amylovora_20070270	1#Erwinia_amylovora_Ea02_03	intact
Erwinia_amylovora_20070270	1#Erwinia_amylovora_Ea4_96	questionable
Erwinia_amylovora_20070270	1#Erwinia_amylovora_Ea8_96	questionable
Erwinia_amylovora_20070270	2#Erwinia_amylovora_Ea03_03	intact
Erwinia_amylovora_20070270	2#Erwinia_amylovora_Ea1_95	intact
Erwinia_amylovora_20070270	2#Erwinia_amylovora_Ea1_98	questionable
Erwinia_amylovora_20070270	2#Erwinia_amylovora_Ea3_97	questionable
Erwinia_amylovora_20070270	2#Erwinia_amylovora_Ea7_96	intact
Erwinia_amylovora_20070270	3#Erwinia_amylovora_Ea04_03	questionable
Erwinia_amylovora_20070270	3#Erwinia_amylovora_Ea1_00	questionable
Erwinia_amylovora_20070270	3#Erwinia_amylovora_Ea1_97	questionable
Erwinia_amylovora_20070270	3#Erwinia_amylovora_Ea2_97	questionable
Erwinia_amylovora_20070270	4#Erwinia_amylovora_E2006P	intact
Erwinia_amylovora_20070270	4#Erwinia_amylovora_Ea6_96	questionable
Erwinia_amylovora_20070270	4#Erwinia_sp_Ejp617	incomplete
Erwinia_amylovora_214_07	1#Erwinia_amylovora_Ea01_03	questionable
Erwinia_amylovora_214_07	1#Erwinia_amylovora_Ea02_03	intact
Erwinia_amylovora_214_07	1#Erwinia_amylovora_Ea4_96	questionable
Erwinia_amylovora_214_07	1#Erwinia_amylovora_Ea8_96	questionable
Erwinia_amylovora_214_07	2#Erwinia_amylovora_Ea03_03	intact
Erwinia_amylovora_214_07	2#Erwinia_amylovora_Ea1_95	intact
Erwinia_amylovora_214_07	2#Erwinia_amylovora_Ea1_98	questionable
Erwinia_amylovora_214_07	2#Erwinia_amylovora_Ea3_97	questionable
Erwinia_amylovora_214_07	2#Erwinia_amylovora_Ea7_96	intact
Erwinia_amylovora_214_07	3#Erwinia_amylovora_Ea04_03	questionable
Erwinia_amylovora_214_07	3#Erwinia_amylovora_Ea1_00	questionable
Erwinia_amylovora_214_07	3#Erwinia_amylovora_Ea1_97	questionable
Erwinia_amylovora_214_07	3#Erwinia_amylovora_Ea2_97	questionable
Erwinia_amylovora_214_07	4#Erwinia_amylovora_E2006P	intact
Erwinia_amylovora_214_07	4#Erwinia_amylovora_Ea6_96	questionable
Erwinia_amylovora_214_07	4#Erwinia_sp_Ejp617	incomplete
Erwinia_amylovora_241_07	1#Erwinia_amylovora_Ea01_03	questionable
Erwinia_amylovora_241_07	1#Erwinia_amylovora_Ea02_03	intact
Erwinia_amylovora_241_07	1#Erwinia_amylovora_Ea4_96	questionable
Erwinia_amylovora_241_07	1#Erwinia_amylovora_Ea8_96	questionable
Erwinia_amylovora_241_07	2#Erwinia_amylovora_Ea03_03	intact
Erwinia_amylovora_241_07	2#Erwinia_amylovora_Ea1_95	intact
Erwinia_amylovora_241_07	2#Erwinia_amylovora_Ea1_98	questionable
Erwinia_amylovora_241_07	2#Erwinia_amylovora_Ea3_97	questionable
Erwinia_amylovora_241_07	2#Erwinia_amylovora_Ea7_96	intact
Erwinia_amylovora_241_07	3#Erwinia_amylovora_Ea04_03	questionable
Erwinia_amylovora_241_07	3#Erwinia_amylovora_Ea1_00	questionable
Erwinia_amylovora_241_07	3#Erwinia_amylovora_Ea1_97	questionable
Erwinia_amylovora_241_07	3#Erwinia_amylovora_Ea2_97	questionable
Erwinia_amylovora_241_07	4#Erwinia_amylovora_E2006P	intact
Erwinia_amylovora_241_07	4#Erwinia_amylovora_Ea6_96	questionable
Erwinia_amylovora_241_07	4#Erwinia_sp_Ejp617	incomplete
Erwinia_amylovora_245_07	1#Erwinia_amylovora_Ea01_03	questionable
Erwinia_amylovora_245_07	1#Erwinia_amylovora_Ea02_03	intact
Erwinia_amylovora_245_07	1#Erwinia_amylovora_Ea4_96	questionable
Erwinia_amylovora_245_07	1#Erwinia_amylovora_Ea8_96	questionable
Erwinia_amylovora_245_07	2#Erwinia_amylovora_Ea03_03	intact
Erwinia_amylovora_245_07	2#Erwinia_amylovora_Ea1_95	intact
Erwinia_amylovora_245_07	2#Erwinia_amylovora_Ea1_98	questionable
Erwinia_amylovora_245_07	2#Erwinia_amylovora_Ea3_97	questionable
Erwinia_amylovora_245_07	2#Erwinia_amylovora_Ea7_96	intact
Erwinia_amylovora_245_07	3#Erwinia_amylovora_Ea04_03	questionable
Erwinia_amylovora_245_07	3#Erwinia_amylovora_Ea1_00	questionable
Erwinia_amylovora_245_07	3#Erwinia_amylovora_Ea1_97	questionable
Erwinia_amylovora_245_07	3#Erwinia_amylovora_Ea2_97	questionable
Erwinia_amylovora_245_07	4#Erwinia_amylovora_E2006P	intact
Erwinia_amylovora_245_07	4#Erwinia_amylovora_Ea6_96	questionable
Erwinia_amylovora_245_07	4#Erwinia_sp_Ejp617	incomplete
Erwinia_amylovora_2558	1#Erwinia_amylovora_Ea01_03	questionable
Erwinia_amylovora_2558	1#Erwinia_amylovora_Ea02_03	intact
Erwinia_amylovora_2558	1#Erwinia_amylovora_Ea4_96	questionable
Erwinia_amylovora_2558	1#Erwinia_amylovora_Ea8_96	questionable
Erwinia_amylovora_2558	2#Erwinia_amylovora_Ea03_03	intact
Erwinia_amylovora_2558	2#Erwinia_amylovora_Ea1_95	intact
Erwinia_amylovora_2558	2#Erwinia_amylovora_Ea1_98	questionable
Erwinia_amylovora_2558	2#Erwinia_amylovora_Ea3_97	questionable
Erwinia_amylovora_2558	2#Erwinia_amylovora_Ea7_96	intact
Erwinia_amylovora_2558	3#Erwinia_amylovora_Ea04_03	questionable
Erwinia_amylovora_2558	3#Erwinia_amylovora_Ea1_00	questionable
Erwinia_amylovora_2558	3#Erwinia_amylovora_Ea1_97	questionable
Erwinia_amylovora_2558	3#Erwinia_amylovora_Ea2_97	questionable
Erwinia_amylovora_2558	4#Erwinia_amylovora_E2006P	intact
Erwinia_amylovora_2558	4#Erwinia_amylovora_Ea6_96	questionable
Erwinia_amylovora_2558	4#Erwinia_sp_Ejp617	incomplete
Erwinia_amylovora_2570	1#Erwinia_amylovora_Ea01_03	questionable
Erwinia_amylovora_2570	1#Erwinia_amylovora_Ea02_03	intact
Erwinia_amylovora_2570	1#Erwinia_amylovora_Ea4_96	questionable
Erwinia_amylovora_2570	1#Erwinia_amylovora_Ea8_96	questionable
Erwinia_amylovora_2570	2#Erwinia_amylovora_Ea03_03	intact
Erwinia_amylovora_2570	2#Erwinia_amylovora_Ea1_95	intact
Erwinia_amylovora_2570	2#Erwinia_amylovora_Ea1_98	questionable
Erwinia_amylovora_2570	2#Erwinia_amylovora_Ea3_97	questionable
Erwinia_amylovora_2570	2#Erwinia_amylovora_Ea7_96	intact
Erwinia_amylovora_2570	3#Erwinia_amylovora_Ea04_03	questionable
Erwinia_amylovora_2570	3#Erwinia_amylovora_Ea1_00	questionable
Erwinia_amylovora_2570	3#Erwinia_amylovora_Ea1_97	questionable
Erwinia_amylovora_2570	3#Erwinia_amylovora_Ea2_97	questionable
Erwinia_amylovora_2570	4#Erwinia_amylovora_E2006P	intact
Erwinia_amylovora_2570	4#Erwinia_amylovora_Ea6_96	questionable
Erwinia_amylovora_2570	4#Erwinia_sp_Ejp617	incomplete
Erwinia_amylovora_32_10	1#Erwinia_amylovora_Ea01_03	questionable
Erwinia_amylovora_32_10	1#Erwinia_amylovora_Ea02_03	intact
Erwinia_amylovora_32_10	1#Erwinia_amylovora_Ea3_97	intact
Erwinia_amylovora_32_10	1#Erwinia_amylovora_Ea4_96	questionable
Erwinia_amylovora_32_10	1#Erwinia_amylovora_Ea8_96	questionable
Erwinia_amylovora_32_10	2#Erwinia_amylovora_Ea03_03	intact
Erwinia_amylovora_32_10	2#Erwinia_amylovora_Ea1_95	intact
Erwinia_amylovora_32_10	2#Erwinia_amylovora_Ea1_98	questionable
Erwinia_amylovora_32_10	2#Erwinia_amylovora_Ea2_97	intact
Erwinia_amylovora_32_10	2#Erwinia_amylovora_Ea3_97	questionable
Erwinia_amylovora_32_10	2#Erwinia_amylovora_Ea7_96	intact
Erwinia_amylovora_32_10	3#Erwinia_amylovora_Ea04_03	questionable
Erwinia_amylovora_32_10	3#Erwinia_amylovora_Ea1_00	questionable
Erwinia_amylovora_32_10	3#Erwinia_amylovora_Ea1_97	questionable
Erwinia_amylovora_32_10	3#Erwinia_amylovora_Ea2_97	questionable
Erwinia_amylovora_32_10	3#Erwinia_amylovora_Ea4_96	intact
Erwinia_amylovora_32_10	4#Erwinia_amylovora_E2006P	intact
Erwinia_amylovora_32_10	4#Erwinia_amylovora_Ea6_96	questionable
Erwinia_amylovora_32_10	4#Erwinia_sp_Ejp617	incomplete
Erwinia_amylovora_33_1	1#Erwinia_amylovora_Ea01_03	questionable
Erwinia_amylovora_33_1	1#Erwinia_amylovora_Ea02_03	intact
Erwinia_amylovora_33_1	1#Erwinia_amylovora_Ea3_97	intact
Erwinia_amylovora_33_1	1#Erwinia_amylovora_Ea4_96	questionable
Erwinia_amylovora_33_1	1#Erwinia_amylovora_Ea8_96	questionable
Erwinia_amylovora_33_1	2#Erwinia_amylovora_Ea03_03	intact
Erwinia_amylovora_33_1	2#Erwinia_amylovora_Ea1_95	intact
Erwinia_amylovora_33_1	2#Erwinia_amylovora_Ea1_98	questionable
Erwinia_amylovora_33_1	2#Erwinia_amylovora_Ea2_97	intact
Erwinia_amylovora_33_1	2#Erwinia_amylovora_Ea3_97	questionable
Erwinia_amylovora_33_1	2#Erwinia_amylovora_Ea7_96	intact
Erwinia_amylovora_33_1	3#Erwinia_amylovora_Ea04_03	questionable
Erwinia_amylovora_33_1	3#Erwinia_amylovora_Ea1_00	questionable
Erwinia_amylovora_33_1	3#Erwinia_amylovora_Ea1_97	questionable
Erwinia_amylovora_33_1	3#Erwinia_amylovora_Ea2_97	questionable
Erwinia_amylovora_33_1	3#Erwinia_amylovora_Ea4_96	intact
Erwinia_amylovora_33_1	4#Erwinia_amylovora_E2006P	intact
Erwinia_amylovora_33_1	4#Erwinia_amylovora_Ea6_96	questionable
Erwinia_amylovora_33_1	4#Erwinia_sp_Ejp617	incomplete
Erwinia_amylovora_3446_1	1#Erwinia_amylovora_Ea01_03	questionable
Erwinia_amylovora_3446_1	1#Erwinia_amylovora_Ea02_03	intact
Erwinia_amylovora_3446_1	1#Erwinia_amylovora_Ea4_96	questionable
Erwinia_amylovora_3446_1	1#Erwinia_amylovora_Ea8_96	questionable
Erwinia_amylovora_3446_1	2#Erwinia_amylovora_Ea03_03	intact
Erwinia_amylovora_3446_1	2#Erwinia_amylovora_Ea1_95	intact
Erwinia_amylovora_3446_1	2#Erwinia_amylovora_Ea1_98	questionable
Erwinia_amylovora_3446_1	2#Erwinia_amylovora_Ea3_97	questionable
Erwinia_amylovora_3446_1	2#Erwinia_amylovora_Ea7_96	intact
Erwinia_amylovora_3446_1	3#Erwinia_amylovora_Ea04_03	questionable
Erwinia_amylovora_3446_1	3#Erwinia_amylovora_Ea1_00	questionable
Erwinia_amylovora_3446_1	3#Erwinia_amylovora_Ea1_97	questionable
Erwinia_amylovora_3446_1	3#Erwinia_amylovora_Ea2_97	questionable
Erwinia_amylovora_3446_1	4#Erwinia_amylovora_E2006P	intact
Erwinia_amylovora_3446_1	4#Erwinia_amylovora_Ea6_96	questionable
Erwinia_amylovora_3446_1	4#Erwinia_sp_Ejp617	incomplete
Erwinia_amylovora_3477_1	1#Erwinia_amylovora_Ea01_03	questionable
Erwinia_amylovora_3477_1	1#Erwinia_amylovora_Ea02_03	intact
Erwinia_amylovora_3477_1	1#Erwinia_amylovora_Ea4_96	questionable
Erwinia_amylovora_3477_1	1#Erwinia_amylovora_Ea8_96	questionable
Erwinia_amylovora_3477_1	2#Erwinia_amylovora_Ea03_03	intact
Erwinia_amylovora_3477_1	2#Erwinia_amylovora_Ea1_95	intact
Erwinia_amylovora_3477_1	2#Erwinia_amylovora_Ea1_98	questionable
Erwinia_amylovora_3477_1	2#Erwinia_amylovora_Ea3_97	questionable
Erwinia_amylovora_3477_1	2#Erwinia_amylovora_Ea7_96	intact
Erwinia_amylovora_3477_1	3#Erwinia_amylovora_Ea04_03	questionable
Erwinia_amylovora_3477_1	3#Erwinia_amylovora_Ea1_00	questionable
Erwinia_amylovora_3477_1	3#Erwinia_amylovora_Ea1_97	questionable
Erwinia_amylovora_3477_1	3#Erwinia_amylovora_Ea2_97	questionable
Erwinia_amylovora_3477_1	4#Erwinia_amylovora_E2006P	intact
Erwinia_amylovora_3477_1	4#Erwinia_amylovora_Ea6_96	questionable
Erwinia_amylovora_3477_1	4#Erwinia_sp_Ejp617	incomplete
Erwinia_amylovora_3515_1	1#Erwinia_amylovora_Ea01_03	questionable
Erwinia_amylovora_3515_1	1#Erwinia_amylovora_Ea02_03	intact
Erwinia_amylovora_3515_1	1#Erwinia_amylovora_Ea3_97	intact
Erwinia_amylovora_3515_1	1#Erwinia_amylovora_Ea4_96	questionable
Erwinia_amylovora_3515_1	1#Erwinia_amylovora_Ea8_96	questionable
Erwinia_amylovora_3515_1	2#Erwinia_amylovora_Ea03_03	intact
Erwinia_amylovora_3515_1	2#Erwinia_amylovora_Ea1_95	intact
Erwinia_amylovora_3515_1	2#Erwinia_amylovora_Ea1_98	questionable
Erwinia_amylovora_3515_1	2#Erwinia_amylovora_Ea2_97	intact
Erwinia_amylovora_3515_1	2#Erwinia_amylovora_Ea3_97	questionable
Erwinia_amylovora_3515_1	2#Erwinia_amylovora_Ea7_96	intact
Erwinia_amylovora_3515_1	3#Erwinia_amylovora_Ea04_03	questionable
Erwinia_amylovora_3515_1	3#Erwinia_amylovora_Ea1_00	questionable
Erwinia_amylovora_3515_1	3#Erwinia_amylovora_Ea1_97	questionable
Erwinia_amylovora_3515_1	3#Erwinia_amylovora_Ea2_97	questionable
Erwinia_amylovora_3515_1	3#Erwinia_amylovora_Ea4_96	intact
Erwinia_amylovora_3515_1	4#Erwinia_amylovora_E2006P	intact
Erwinia_amylovora_3515_1	4#Erwinia_amylovora_Ea6_96	questionable
Erwinia_amylovora_3515_1	4#Erwinia_sp_Ejp617	incomplete
Erwinia_amylovora_39_I_II	1#Erwinia_amylovora_Ea01_03	questionable
Erwinia_amylovora_39_I_II	1#Erwinia_amylovora_Ea02_03	intact
Erwinia_amylovora_39_I_II	1#Erwinia_amylovora_Ea4_96	questionable
Erwinia_amylovora_39_I_II	1#Erwinia_amylovora_Ea8_96	questionable
Erwinia_amylovora_39_I_II	2#Erwinia_amylovora_Ea03_03	intact
Erwinia_amylovora_39_I_II	2#Erwinia_amylovora_Ea1_95	intact
Erwinia_amylovora_39_I_II	2#Erwinia_amylovora_Ea1_98	questionable
Erwinia_amylovora_39_I_II	2#Erwinia_amylovora_Ea3_97	questionable
Erwinia_amylovora_39_I_II	2#Erwinia_amylovora_Ea7_96	intact
Erwinia_amylovora_39_I_II	3#Erwinia_amylovora_Ea04_03	questionable
Erwinia_amylovora_39_I_II	3#Erwinia_amylovora_Ea1_00	questionable
Erwinia_amylovora_39_I_II	3#Erwinia_amylovora_Ea1_97	questionable
Erwinia_amylovora_39_I_II	3#Erwinia_amylovora_Ea2_97	questionable
Erwinia_amylovora_39_I_II	4#Erwinia_amylovora_E2006P	intact
Erwinia_amylovora_39_I_II	4#Erwinia_amylovora_Ea6_96	questionable
Erwinia_amylovora_39_I_II	4#Erwinia_sp_Ejp617	incomplete
Erwinia_amylovora_39_M1_II	1#Erwinia_amylovora_Ea01_03	questionable
Erwinia_amylovora_39_M1_II	1#Erwinia_amylovora_Ea02_03	intact
Erwinia_amylovora_39_M1_II	1#Erwinia_amylovora_Ea4_96	questionable
Erwinia_amylovora_39_M1_II	1#Erwinia_amylovora_Ea8_96	questionable
Erwinia_amylovora_39_M1_II	2#Erwinia_amylovora_Ea03_03	intact
Erwinia_amylovora_39_M1_II	2#Erwinia_amylovora_Ea1_95	intact
Erwinia_amylovora_39_M1_II	2#Erwinia_amylovora_Ea1_98	questionable
Erwinia_amylovora_39_M1_II	2#Erwinia_amylovora_Ea3_97	questionable
Erwinia_amylovora_39_M1_II	2#Erwinia_amylovora_Ea7_96	intact
Erwinia_amylovora_39_M1_II	3#Erwinia_amylovora_Ea04_03	questionable
Erwinia_amylovora_39_M1_II	3#Erwinia_amylovora_Ea1_00	questionable
Erwinia_amylovora_39_M1_II	3#Erwinia_amylovora_Ea1_97	questionable
Erwinia_amylovora_39_M1_II	3#Erwinia_amylovora_Ea2_97	questionable
Erwinia_amylovora_39_M1_II	4#Erwinia_amylovora_E2006P	intact
Erwinia_amylovora_39_M1_II	4#Erwinia_amylovora_Ea6_96	questionable
Erwinia_amylovora_39_M1_II	4#Erwinia_sp_Ejp617	incomplete
Erwinia_amylovora_46_4_2	1#Erwinia_amylovora_Ea01_03	questionable
Erwinia_amylovora_46_4_2	1#Erwinia_amylovora_Ea02_03	intact
Erwinia_amylovora_46_4_2	1#Erwinia_amylovora_Ea4_96	questionable
Erwinia_amylovora_46_4_2	1#Erwinia_amylovora_Ea8_96	questionable
Erwinia_amylovora_46_4_2	2#Erwinia_amylovora_Ea03_03	intact
Erwinia_amylovora_46_4_2	2#Erwinia_amylovora_Ea1_95	intact
Erwinia_amylovora_46_4_2	2#Erwinia_amylovora_Ea1_98	questionable
Erwinia_amylovora_46_4_2	2#Erwinia_amylovora_Ea3_97	questionable
Erwinia_amylovora_46_4_2	2#Erwinia_amylovora_Ea7_96	intact
Erwinia_amylovora_46_4_2	3#Erwinia_amylovora_Ea04_03	questionable
Erwinia_amylovora_46_4_2	3#Erwinia_amylovora_Ea1_00	questionable
Erwinia_amylovora_46_4_2	3#Erwinia_amylovora_Ea1_97	questionable
Erwinia_amylovora_46_4_2	3#Erwinia_amylovora_Ea2_97	questionable
Erwinia_amylovora_46_4_2	4#Erwinia_amylovora_E2006P	intact
Erwinia_amylovora_46_4_2	4#Erwinia_amylovora_Ea6_96	questionable
Erwinia_amylovora_46_4_2	4#Erwinia_sp_Ejp617	incomplete
Erwinia_amylovora_7_3	1#Erwinia_amylovora_Ea01_03	questionable
Erwinia_amylovora_7_3	1#Erwinia_amylovora_Ea02_03	intact
Erwinia_amylovora_7_3	1#Erwinia_amylovora_Ea3_97	intact
Erwinia_amylovora_7_3	1#Erwinia_amylovora_Ea4_96	questionable
Erwinia_amylovora_7_3	1#Erwinia_amylovora_Ea8_96	questionable
Erwinia_amylovora_7_3	2#Erwinia_amylovora_Ea03_03	intact
Erwinia_amylovora_7_3	2#Erwinia_amylovora_Ea1_95	intact
Erwinia_amylovora_7_3	2#Erwinia_amylovora_Ea1_98	questionable
Erwinia_amylovora_7_3	2#Erwinia_amylovora_Ea2_97	intact
Erwinia_amylovora_7_3	2#Erwinia_amylovora_Ea3_97	questionable
Erwinia_amylovora_7_3	2#Erwinia_amylovora_Ea7_96	intact
Erwinia_amylovora_7_3	3#Erwinia_amylovora_Ea04_03	questionable
Erwinia_amylovora_7_3	3#Erwinia_amylovora_Ea1_00	questionable
Erwinia_amylovora_7_3	3#Erwinia_amylovora_Ea1_97	questionable
Erwinia_amylovora_7_3	3#Erwinia_amylovora_Ea2_97	questionable
Erwinia_amylovora_7_3	3#Erwinia_amylovora_Ea4_96	intact
Erwinia_amylovora_7_3	4#Erwinia_amylovora_E2006P	intact
Erwinia_amylovora_7_3	4#Erwinia_amylovora_Ea6_96	questionable
Erwinia_amylovora_7_3	4#Erwinia_sp_Ejp617	incomplete
Erwinia_amylovora_ACW56400	1#Erwinia_amylovora_Ea01_03	questionable
Erwinia_amylovora_ACW56400	1#Erwinia_amylovora_Ea02_03	intact
Erwinia_amylovora_ACW56400	1#Erwinia_amylovora_Ea4_96	questionable
Erwinia_amylovora_ACW56400	1#Erwinia_amylovora_Ea8_96	questionable
Erwinia_amylovora_ACW56400	2#Erwinia_amylovora_Ea03_03	intact
Erwinia_amylovora_ACW56400	2#Erwinia_amylovora_Ea1_95	intact
Erwinia_amylovora_ACW56400	2#Erwinia_amylovora_Ea1_98	questionable
Erwinia_amylovora_ACW56400	2#Erwinia_amylovora_Ea3_97	questionable
Erwinia_amylovora_ACW56400	2#Erwinia_amylovora_Ea7_96	intact
Erwinia_amylovora_ACW56400	3#Erwinia_amylovora_Ea04_03	questionable
Erwinia_amylovora_ACW56400	3#Erwinia_amylovora_Ea1_00	questionable
Erwinia_amylovora_ACW56400	3#Erwinia_amylovora_Ea1_97	questionable
Erwinia_amylovora_ACW56400	3#Erwinia_amylovora_Ea2_97	questionable
Erwinia_amylovora_ACW56400	4#Erwinia_amylovora_E2006P	intact
Erwinia_amylovora_ACW56400	4#Erwinia_amylovora_Ea6_96	questionable
Erwinia_amylovora_ACW56400	4#Erwinia_sp_Ejp617	incomplete
Erwinia_amylovora_ATCC_15580	1#Erwinia_amylovora_Ea01_03	questionable
Erwinia_amylovora_ATCC_15580	1#Erwinia_amylovora_Ea02_03	intact
Erwinia_amylovora_ATCC_15580	1#Erwinia_amylovora_Ea4_96	questionable
Erwinia_amylovora_ATCC_15580	1#Erwinia_amylovora_Ea8_96	questionable
Erwinia_amylovora_ATCC_15580	2#Erwinia_amylovora_Ea03_03	intact
Erwinia_amylovora_ATCC_15580	2#Erwinia_amylovora_Ea1_95	intact
Erwinia_amylovora_ATCC_15580	2#Erwinia_amylovora_Ea1_98	questionable
Erwinia_amylovora_ATCC_15580	2#Erwinia_amylovora_Ea3_97	questionable
Erwinia_amylovora_ATCC_15580	2#Erwinia_amylovora_Ea7_96	intact
Erwinia_amylovora_ATCC_15580	3#Erwinia_amylovora_Ea04_03	questionable
Erwinia_amylovora_ATCC_15580	3#Erwinia_amylovora_Ea1_00	questionable
Erwinia_amylovora_ATCC_15580	3#Erwinia_amylovora_Ea1_97	questionable
Erwinia_amylovora_ATCC_15580	3#Erwinia_amylovora_Ea2_97	questionable
Erwinia_amylovora_ATCC_15580	4#Erwinia_amylovora_E2006P	intact
Erwinia_amylovora_ATCC_15580	4#Erwinia_amylovora_Ea6_96	questionable
Erwinia_amylovora_ATCC_15580	4#Erwinia_sp_Ejp617	incomplete
Erwinia_amylovora_ATCC_49946	1#Erwinia_amylovora_Ea01_03	questionable
Erwinia_amylovora_ATCC_49946	1#Erwinia_amylovora_Ea02_03	intact
Erwinia_amylovora_ATCC_49946	1#Erwinia_amylovora_Ea4_96	questionable
Erwinia_amylovora_ATCC_49946	1#Erwinia_amylovora_Ea8_96	questionable
Erwinia_amylovora_ATCC_49946	2#Erwinia_amylovora_Ea03_03	intact
Erwinia_amylovora_ATCC_49946	2#Erwinia_amylovora_Ea1_95	intact
Erwinia_amylovora_ATCC_49946	2#Erwinia_amylovora_Ea1_98	questionable
Erwinia_amylovora_ATCC_49946	2#Erwinia_amylovora_Ea3_97	questionable
Erwinia_amylovora_ATCC_49946	2#Erwinia_amylovora_Ea7_96	intact
Erwinia_amylovora_ATCC_49946	3#Erwinia_amylovora_Ea04_03	questionable
Erwinia_amylovora_ATCC_49946	3#Erwinia_amylovora_Ea1_00	questionable
Erwinia_amylovora_ATCC_49946	3#Erwinia_amylovora_Ea1_97	questionable
Erwinia_amylovora_ATCC_49946	3#Erwinia_amylovora_Ea2_97	questionable
Erwinia_amylovora_ATCC_49946	4#Erwinia_amylovora_E2006P	intact
Erwinia_amylovora_ATCC_49946	4#Erwinia_amylovora_Ea6_96	questionable
Erwinia_amylovora_ATCC_49946	4#Erwinia_sp_Ejp617	incomplete
Erwinia_amylovora_CA3R	1#Erwinia_amylovora_Ea01_03	questionable
Erwinia_amylovora_CA3R	1#Erwinia_amylovora_Ea02_03	intact
Erwinia_amylovora_CA3R	1#Erwinia_amylovora_Ea4_96	questionable
Erwinia_amylovora_CA3R	1#Erwinia_amylovora_Ea8_96	questionable
Erwinia_amylovora_CA3R	2#Erwinia_amylovora_Ea03_03	intact
Erwinia_amylovora_CA3R	2#Erwinia_amylovora_Ea1_95	intact
Erwinia_amylovora_CA3R	2#Erwinia_amylovora_Ea1_98	questionable
Erwinia_amylovora_CA3R	2#Erwinia_amylovora_Ea3_97	questionable
Erwinia_amylovora_CA3R	2#Erwinia_amylovora_Ea7_96	intact
Erwinia_amylovora_CA3R	3#Erwinia_amylovora_Ea04_03	questionable
Erwinia_amylovora_CA3R	3#Erwinia_amylovora_Ea1_00	questionable
Erwinia_amylovora_CA3R	3#Erwinia_amylovora_Ea1_97	questionable
Erwinia_amylovora_CA3R	3#Erwinia_amylovora_Ea2_97	questionable
Erwinia_amylovora_CA3R	4#Erwinia_amylovora_E2006P	intact
Erwinia_amylovora_CA3R	4#Erwinia_amylovora_Ea6_96	questionable
Erwinia_amylovora_CA3R	4#Erwinia_sp_Ejp617	incomplete
Erwinia_amylovora_CFBP_1232	1#Erwinia_amylovora_Ea01_03	questionable
Erwinia_amylovora_CFBP_1232	1#Erwinia_amylovora_Ea02_03	intact
Erwinia_amylovora_CFBP_1232	1#Erwinia_amylovora_Ea4_96	questionable
Erwinia_amylovora_CFBP_1232	1#Erwinia_amylovora_Ea8_96	questionable
Erwinia_amylovora_CFBP_1232	2#Erwinia_amylovora_Ea03_03	intact
Erwinia_amylovora_CFBP_1232	2#Erwinia_amylovora_Ea1_95	intact
Erwinia_amylovora_CFBP_1232	2#Erwinia_amylovora_Ea1_98	questionable
Erwinia_amylovora_CFBP_1232	2#Erwinia_amylovora_Ea3_97	questionable
Erwinia_amylovora_CFBP_1232	2#Erwinia_amylovora_Ea7_96	intact
Erwinia_amylovora_CFBP_1232	3#Erwinia_amylovora_Ea04_03	questionable
Erwinia_amylovora_CFBP_1232	3#Erwinia_amylovora_Ea1_00	questionable
Erwinia_amylovora_CFBP_1232	3#Erwinia_amylovora_Ea1_97	questionable
Erwinia_amylovora_CFBP_1232	3#Erwinia_amylovora_Ea2_97	questionable
Erwinia_amylovora_CFBP_1232	4#Erwinia_amylovora_E2006P	intact
Erwinia_amylovora_CFBP_1232	4#Erwinia_amylovora_Ea6_96	questionable
Erwinia_amylovora_CFBP_1232	4#Erwinia_sp_Ejp617	incomplete
Erwinia_amylovora_CFBP_1995	1#Erwinia_amylovora_Ea01_03	questionable
Erwinia_amylovora_CFBP_1995	1#Erwinia_amylovora_Ea02_03	intact
Erwinia_amylovora_CFBP_1995	1#Erwinia_amylovora_Ea4_96	questionable
Erwinia_amylovora_CFBP_1995	1#Erwinia_amylovora_Ea8_96	questionable
Erwinia_amylovora_CFBP_1995	2#Erwinia_amylovora_Ea03_03	intact
Erwinia_amylovora_CFBP_1995	2#Erwinia_amylovora_Ea1_95	intact
Erwinia_amylovora_CFBP_1995	2#Erwinia_amylovora_Ea1_98	questionable
Erwinia_amylovora_CFBP_1995	2#Erwinia_amylovora_Ea3_97	questionable
Erwinia_amylovora_CFBP_1995	2#Erwinia_amylovora_Ea7_96	intact
Erwinia_amylovora_CFBP_1995	3#Erwinia_amylovora_Ea04_03	questionable
Erwinia_amylovora_CFBP_1995	3#Erwinia_amylovora_Ea1_00	questionable
Erwinia_amylovora_CFBP_1995	3#Erwinia_amylovora_Ea1_97	questionable
Erwinia_amylovora_CFBP_1995	3#Erwinia_amylovora_Ea2_97	questionable
Erwinia_amylovora_CFBP_1995	4#Erwinia_amylovora_E2006P	intact
Erwinia_amylovora_CFBP_1995	4#Erwinia_amylovora_Ea6_96	questionable
Erwinia_amylovora_CFBP_1995	4#Erwinia_sp_Ejp617	incomplete
Erwinia_amylovora_CFBP_2313	1#Erwinia_amylovora_Ea01_03	questionable
Erwinia_amylovora_CFBP_2313	1#Erwinia_amylovora_Ea02_03	intact
Erwinia_amylovora_CFBP_2313	1#Erwinia_amylovora_Ea4_96	questionable
Erwinia_amylovora_CFBP_2313	1#Erwinia_amylovora_Ea8_96	questionable
Erwinia_amylovora_CFBP_2313	2#Erwinia_amylovora_Ea03_03	intact
Erwinia_amylovora_CFBP_2313	2#Erwinia_amylovora_Ea1_95	intact
Erwinia_amylovora_CFBP_2313	2#Erwinia_amylovora_Ea1_98	questionable
Erwinia_amylovora_CFBP_2313	2#Erwinia_amylovora_Ea3_97	questionable
Erwinia_amylovora_CFBP_2313	2#Erwinia_amylovora_Ea7_96	intact
Erwinia_amylovora_CFBP_2313	3#Erwinia_amylovora_Ea04_03	questionable
Erwinia_amylovora_CFBP_2313	3#Erwinia_amylovora_Ea1_00	questionable
Erwinia_amylovora_CFBP_2313	3#Erwinia_amylovora_Ea1_97	questionable
Erwinia_amylovora_CFBP_2313	3#Erwinia_amylovora_Ea2_97	questionable
Erwinia_amylovora_CFBP_2313	4#Erwinia_amylovora_E2006P	intact
Erwinia_amylovora_CFBP_2313	4#Erwinia_amylovora_Ea6_96	questionable
Erwinia_amylovora_CFBP_2313	4#Erwinia_sp_Ejp617	incomplete
Erwinia_amylovora_CFBP_2585	1#Erwinia_amylovora_Ea01_03	questionable
Erwinia_amylovora_CFBP_2585	1#Erwinia_amylovora_Ea02_03	intact
Erwinia_amylovora_CFBP_2585	1#Erwinia_amylovora_Ea4_96	questionable
Erwinia_amylovora_CFBP_2585	1#Erwinia_amylovora_Ea8_96	questionable
Erwinia_amylovora_CFBP_2585	2#Erwinia_amylovora_Ea03_03	intact
Erwinia_amylovora_CFBP_2585	2#Erwinia_amylovora_Ea1_95	intact
Erwinia_amylovora_CFBP_2585	2#Erwinia_amylovora_Ea1_98	questionable
Erwinia_amylovora_CFBP_2585	2#Erwinia_amylovora_Ea3_97	questionable
Erwinia_amylovora_CFBP_2585	2#Erwinia_amylovora_Ea7_96	intact
Erwinia_amylovora_CFBP_2585	3#Erwinia_amylovora_Ea04_03	questionable
Erwinia_amylovora_CFBP_2585	3#Erwinia_amylovora_Ea1_00	questionable
Erwinia_amylovora_CFBP_2585	3#Erwinia_amylovora_Ea1_97	questionable
Erwinia_amylovora_CFBP_2585	3#Erwinia_amylovora_Ea2_97	questionable
Erwinia_amylovora_CFBP_2585	4#Erwinia_amylovora_E2006P	intact
Erwinia_amylovora_CFBP_2585	4#Erwinia_amylovora_Ea6_96	questionable
Erwinia_amylovora_CFBP_2585	4#Erwinia_sp_Ejp617	incomplete
Erwinia_amylovora_CFBP_7130	1#Erwinia_amylovora_Ea01_03	questionable
Erwinia_amylovora_CFBP_7130	1#Erwinia_amylovora_Ea02_03	intact
Erwinia_amylovora_CFBP_7130	1#Erwinia_amylovora_Ea4_96	questionable
Erwinia_amylovora_CFBP_7130	1#Erwinia_amylovora_Ea8_96	questionable
Erwinia_amylovora_CFBP_7130	2#Erwinia_amylovora_Ea03_03	intact
Erwinia_amylovora_CFBP_7130	2#Erwinia_amylovora_Ea1_95	intact
Erwinia_amylovora_CFBP_7130	2#Erwinia_amylovora_Ea1_98	questionable
Erwinia_amylovora_CFBP_7130	2#Erwinia_amylovora_Ea3_97	questionable
Erwinia_amylovora_CFBP_7130	2#Erwinia_amylovora_Ea7_96	intact
Erwinia_amylovora_CFBP_7130	3#Erwinia_amylovora_Ea04_03	questionable
Erwinia_amylovora_CFBP_7130	3#Erwinia_amylovora_Ea1_00	questionable
Erwinia_amylovora_CFBP_7130	3#Erwinia_amylovora_Ea1_97	questionable
Erwinia_amylovora_CFBP_7130	3#Erwinia_amylovora_Ea2_97	questionable
Erwinia_amylovora_CFBP_7130	4#Erwinia_amylovora_E2006P	intact
Erwinia_amylovora_CFBP_7130	4#Erwinia_amylovora_Ea6_96	questionable
Erwinia_amylovora_CFBP_7130	4#Erwinia_sp_Ejp617	incomplete
Erwinia_amylovora_CFBP_7131	1#Erwinia_amylovora_Ea01_03	questionable
Erwinia_amylovora_CFBP_7131	1#Erwinia_amylovora_Ea02_03	intact
Erwinia_amylovora_CFBP_7131	1#Erwinia_amylovora_Ea4_96	questionable
Erwinia_amylovora_CFBP_7131	1#Erwinia_amylovora_Ea8_96	questionable
Erwinia_amylovora_CFBP_7131	2#Erwinia_amylovora_Ea03_03	intact
Erwinia_amylovora_CFBP_7131	2#Erwinia_amylovora_Ea1_95	intact
Erwinia_amylovora_CFBP_7131	2#Erwinia_amylovora_Ea1_98	questionable
Erwinia_amylovora_CFBP_7131	2#Erwinia_amylovora_Ea3_97	questionable
Erwinia_amylovora_CFBP_7131	2#Erwinia_amylovora_Ea7_96	intact
Erwinia_amylovora_CFBP_7131	3#Erwinia_amylovora_Ea04_03	questionable
Erwinia_amylovora_CFBP_7131	3#Erwinia_amylovora_Ea1_00	questionable
Erwinia_amylovora_CFBP_7131	3#Erwinia_amylovora_Ea1_97	questionable
Erwinia_amylovora_CFBP_7131	3#Erwinia_amylovora_Ea2_97	questionable
Erwinia_amylovora_CFBP_7131	4#Erwinia_amylovora_E2006P	intact
Erwinia_amylovora_CFBP_7131	4#Erwinia_amylovora_Ea6_96	questionable
Erwinia_amylovora_CFBP_7131	4#Erwinia_sp_Ejp617	incomplete
Erwinia_amylovora_CFBP1430	1#Erwinia_amylovora_Ea01_03	questionable
Erwinia_amylovora_CFBP1430	1#Erwinia_amylovora_Ea02_03	intact
Erwinia_amylovora_CFBP1430	1#Erwinia_amylovora_Ea4_96	questionable
Erwinia_amylovora_CFBP1430	1#Erwinia_amylovora_Ea8_96	questionable
Erwinia_amylovora_CFBP1430	2#Erwinia_amylovora_Ea03_03	intact
Erwinia_amylovora_CFBP1430	2#Erwinia_amylovora_Ea1_95	intact
Erwinia_amylovora_CFBP1430	2#Erwinia_amylovora_Ea1_98	questionable
Erwinia_amylovora_CFBP1430	2#Erwinia_amylovora_Ea3_97	questionable
Erwinia_amylovora_CFBP1430	2#Erwinia_amylovora_Ea7_96	intact
Erwinia_amylovora_CFBP1430	3#Erwinia_amylovora_Ea04_03	questionable
Erwinia_amylovora_CFBP1430	3#Erwinia_amylovora_Ea1_00	questionable
Erwinia_amylovora_CFBP1430	3#Erwinia_amylovora_Ea1_97	questionable
Erwinia_amylovora_CFBP1430	3#Erwinia_amylovora_Ea2_97	questionable
Erwinia_amylovora_CFBP1430	4#Erwinia_amylovora_E2006P	intact
Erwinia_amylovora_CFBP1430	4#Erwinia_amylovora_Ea6_96	questionable
Erwinia_amylovora_CFBP1430	4#Erwinia_sp_Ejp617	incomplete
Erwinia_amylovora_CTBT1_1	1#Erwinia_amylovora_Ea01_03	questionable
Erwinia_amylovora_CTBT1_1	1#Erwinia_amylovora_Ea02_03	intact
Erwinia_amylovora_CTBT1_1	1#Erwinia_amylovora_Ea3_97	intact
Erwinia_amylovora_CTBT1_1	1#Erwinia_amylovora_Ea4_96	questionable
Erwinia_amylovora_CTBT1_1	1#Erwinia_amylovora_Ea8_96	questionable
Erwinia_amylovora_CTBT1_1	2#Erwinia_amylovora_Ea03_03	intact
Erwinia_amylovora_CTBT1_1	2#Erwinia_amylovora_Ea1_95	intact
Erwinia_amylovora_CTBT1_1	2#Erwinia_amylovora_Ea1_98	questionable
Erwinia_amylovora_CTBT1_1	2#Erwinia_amylovora_Ea2_97	intact
Erwinia_amylovora_CTBT1_1	2#Erwinia_amylovora_Ea3_97	questionable
Erwinia_amylovora_CTBT1_1	2#Erwinia_amylovora_Ea7_96	intact
Erwinia_amylovora_CTBT1_1	3#Erwinia_amylovora_Ea04_03	questionable
Erwinia_amylovora_CTBT1_1	3#Erwinia_amylovora_Ea1_00	questionable
Erwinia_amylovora_CTBT1_1	3#Erwinia_amylovora_Ea1_97	questionable
Erwinia_amylovora_CTBT1_1	3#Erwinia_amylovora_Ea2_97	questionable
Erwinia_amylovora_CTBT1_1	3#Erwinia_amylovora_Ea4_96	intact
Erwinia_amylovora_CTBT1_1	4#Erwinia_amylovora_E2006P	intact
Erwinia_amylovora_CTBT1_1	4#Erwinia_amylovora_Ea6_96	questionable
Erwinia_amylovora_CTBT1_1	4#Erwinia_sp_Ejp617	incomplete
Erwinia_amylovora_CTBT3_1	1#Erwinia_amylovora_Ea01_03	questionable
Erwinia_amylovora_CTBT3_1	1#Erwinia_amylovora_Ea02_03	intact
Erwinia_amylovora_CTBT3_1	1#Erwinia_amylovora_Ea3_97	intact
Erwinia_amylovora_CTBT3_1	1#Erwinia_amylovora_Ea4_96	questionable
Erwinia_amylovora_CTBT3_1	1#Erwinia_amylovora_Ea8_96	questionable
Erwinia_amylovora_CTBT3_1	2#Erwinia_amylovora_Ea03_03	intact
Erwinia_amylovora_CTBT3_1	2#Erwinia_amylovora_Ea1_95	intact
Erwinia_amylovora_CTBT3_1	2#Erwinia_amylovora_Ea1_98	questionable
Erwinia_amylovora_CTBT3_1	2#Erwinia_amylovora_Ea2_97	intact
Erwinia_amylovora_CTBT3_1	2#Erwinia_amylovora_Ea3_97	questionable
Erwinia_amylovora_CTBT3_1	2#Erwinia_amylovora_Ea7_96	intact
Erwinia_amylovora_CTBT3_1	3#Erwinia_amylovora_Ea04_03	questionable
Erwinia_amylovora_CTBT3_1	3#Erwinia_amylovora_Ea1_00	questionable
Erwinia_amylovora_CTBT3_1	3#Erwinia_amylovora_Ea1_97	questionable
Erwinia_amylovora_CTBT3_1	3#Erwinia_amylovora_Ea2_97	questionable
Erwinia_amylovora_CTBT3_1	3#Erwinia_amylovora_Ea4_96	intact
Erwinia_amylovora_CTBT3_1	4#Erwinia_amylovora_E2006P	intact
Erwinia_amylovora_CTBT3_1	4#Erwinia_amylovora_Ea6_96	questionable
Erwinia_amylovora_CTBT3_1	4#Erwinia_sp_Ejp617	incomplete
Erwinia_amylovora_CTMF03_1	1#Erwinia_amylovora_Ea01_03	questionable
Erwinia_amylovora_CTMF03_1	1#Erwinia_amylovora_Ea02_03	intact
Erwinia_amylovora_CTMF03_1	1#Erwinia_amylovora_Ea3_97	intact
Erwinia_amylovora_CTMF03_1	1#Erwinia_amylovora_Ea4_96	questionable
Erwinia_amylovora_CTMF03_1	1#Erwinia_amylovora_Ea8_96	questionable
Erwinia_amylovora_CTMF03_1	2#Erwinia_amylovora_Ea03_03	intact
Erwinia_amylovora_CTMF03_1	2#Erwinia_amylovora_Ea1_95	intact
Erwinia_amylovora_CTMF03_1	2#Erwinia_amylovora_Ea1_98	questionable
Erwinia_amylovora_CTMF03_1	2#Erwinia_amylovora_Ea2_97	intact
Erwinia_amylovora_CTMF03_1	2#Erwinia_amylovora_Ea3_97	questionable
Erwinia_amylovora_CTMF03_1	2#Erwinia_amylovora_Ea7_96	intact
Erwinia_amylovora_CTMF03_1	3#Erwinia_amylovora_Ea04_03	questionable
Erwinia_amylovora_CTMF03_1	3#Erwinia_amylovora_Ea1_00	questionable
Erwinia_amylovora_CTMF03_1	3#Erwinia_amylovora_Ea1_97	questionable
Erwinia_amylovora_CTMF03_1	3#Erwinia_amylovora_Ea2_97	questionable
Erwinia_amylovora_CTMF03_1	3#Erwinia_amylovora_Ea4_96	intact
Erwinia_amylovora_CTMF03_1	4#Erwinia_amylovora_E2006P	intact
Erwinia_amylovora_CTMF03_1	4#Erwinia_amylovora_Ea6_96	questionable
Erwinia_amylovora_CTMF03_1	4#Erwinia_sp_Ejp617	incomplete
Erwinia_amylovora_CTST01_1	1#Erwinia_amylovora_Ea01_03	questionable
Erwinia_amylovora_CTST01_1	1#Erwinia_amylovora_Ea02_03	intact
Erwinia_amylovora_CTST01_1	1#Erwinia_amylovora_Ea3_97	intact
Erwinia_amylovora_CTST01_1	1#Erwinia_amylovora_Ea4_96	questionable
Erwinia_amylovora_CTST01_1	1#Erwinia_amylovora_Ea8_96	questionable
Erwinia_amylovora_CTST01_1	2#Erwinia_amylovora_Ea03_03	intact
Erwinia_amylovora_CTST01_1	2#Erwinia_amylovora_Ea1_95	intact
Erwinia_amylovora_CTST01_1	2#Erwinia_amylovora_Ea1_98	questionable
Erwinia_amylovora_CTST01_1	2#Erwinia_amylovora_Ea2_97	intact
Erwinia_amylovora_CTST01_1	2#Erwinia_amylovora_Ea3_97	questionable
Erwinia_amylovora_CTST01_1	2#Erwinia_amylovora_Ea7_96	intact
Erwinia_amylovora_CTST01_1	3#Erwinia_amylovora_Ea04_03	questionable
Erwinia_amylovora_CTST01_1	3#Erwinia_amylovora_Ea1_00	questionable
Erwinia_amylovora_CTST01_1	3#Erwinia_amylovora_Ea1_97	questionable
Erwinia_amylovora_CTST01_1	3#Erwinia_amylovora_Ea2_97	questionable
Erwinia_amylovora_CTST01_1	3#Erwinia_amylovora_Ea4_96	intact
Erwinia_amylovora_CTST01_1	4#Erwinia_amylovora_E2006P	intact
Erwinia_amylovora_CTST01_1	4#Erwinia_amylovora_Ea6_96	questionable
Erwinia_amylovora_CTST01_1	4#Erwinia_sp_Ejp617	incomplete
Erwinia_amylovora_E_2	1#Erwinia_amylovora_Ea01_03	questionable
Erwinia_amylovora_E_2	1#Erwinia_amylovora_Ea02_03	intact
Erwinia_amylovora_E_2	1#Erwinia_amylovora_Ea4_96	questionable
Erwinia_amylovora_E_2	1#Erwinia_amylovora_Ea8_96	questionable
Erwinia_amylovora_E_2	2#Erwinia_amylovora_Ea03_03	intact
Erwinia_amylovora_E_2	2#Erwinia_amylovora_Ea1_95	intact
Erwinia_amylovora_E_2	2#Erwinia_amylovora_Ea1_98	questionable
Erwinia_amylovora_E_2	2#Erwinia_amylovora_Ea3_97	questionable
Erwinia_amylovora_E_2	2#Erwinia_amylovora_Ea7_96	intact
Erwinia_amylovora_E_2	3#Erwinia_amylovora_Ea04_03	questionable
Erwinia_amylovora_E_2	3#Erwinia_amylovora_Ea1_00	questionable
Erwinia_amylovora_E_2	3#Erwinia_amylovora_Ea1_97	questionable
Erwinia_amylovora_E_2	3#Erwinia_amylovora_Ea2_97	questionable
Erwinia_amylovora_E_2	4#Erwinia_amylovora_E2006P	intact
Erwinia_amylovora_E_2	4#Erwinia_amylovora_Ea6_96	questionable
Erwinia_amylovora_E_2	4#Erwinia_sp_Ejp617	incomplete
Erwinia_amylovora_E2005A	1#Erwinia_amylovora_Ea01_03	questionable
Erwinia_amylovora_E2005A	1#Erwinia_amylovora_Ea02_03	intact
Erwinia_amylovora_E2005A	1#Erwinia_amylovora_Ea4_96	questionable
Erwinia_amylovora_E2005A	1#Erwinia_amylovora_Ea8_96	questionable
Erwinia_amylovora_E2005A	2#Erwinia_amylovora_Ea03_03	intact
Erwinia_amylovora_E2005A	2#Erwinia_amylovora_Ea1_95	intact
Erwinia_amylovora_E2005A	2#Erwinia_amylovora_Ea1_98	questionable
Erwinia_amylovora_E2005A	2#Erwinia_amylovora_Ea3_97	questionable
Erwinia_amylovora_E2005A	2#Erwinia_amylovora_Ea7_96	intact
Erwinia_amylovora_E2005A	3#Erwinia_amylovora_Ea04_03	questionable
Erwinia_amylovora_E2005A	3#Erwinia_amylovora_Ea1_00	questionable
Erwinia_amylovora_E2005A	3#Erwinia_amylovora_Ea1_97	questionable
Erwinia_amylovora_E2005A	3#Erwinia_amylovora_Ea2_97	questionable
Erwinia_amylovora_E2005A	4#Erwinia_amylovora_E2006P	intact
Erwinia_amylovora_E2005A	4#Erwinia_amylovora_Ea6_96	questionable
Erwinia_amylovora_E2005A	4#Erwinia_sp_Ejp617	incomplete
Erwinia_amylovora_Ea01_03	1#Erwinia_amylovora_Ea3_97	intact
Erwinia_amylovora_Ea01_03	2#Erwinia_amylovora_Ea2_97	intact
Erwinia_amylovora_Ea01_03	3#Erwinia_amylovora_Ea4_96	intact
Erwinia_amylovora_Ea04_03	1#Erwinia_amylovora_Ea3_97	intact
Erwinia_amylovora_Ea04_03	2#Erwinia_amylovora_Ea2_97	intact
Erwinia_amylovora_Ea04_03	3#Erwinia_amylovora_Ea4_96	intact
Erwinia_amylovora_Ea1_00	1#Erwinia_amylovora_Ea3_97	intact
Erwinia_amylovora_Ea1_00	2#Erwinia_amylovora_Ea2_97	intact
Erwinia_amylovora_Ea1_00	3#Erwinia_amylovora_Ea4_96	intact
Erwinia_amylovora_Ea1_79Sm	1#Erwinia_amylovora_Ea01_03	questionable
Erwinia_amylovora_Ea1_79Sm	1#Erwinia_amylovora_Ea02_03	intact
Erwinia_amylovora_Ea1_79Sm	1#Erwinia_amylovora_Ea4_96	questionable
Erwinia_amylovora_Ea1_79Sm	1#Erwinia_amylovora_Ea8_96	questionable
Erwinia_amylovora_Ea1_79Sm	2#Erwinia_amylovora_Ea03_03	intact
Erwinia_amylovora_Ea1_79Sm	2#Erwinia_amylovora_Ea1_95	intact
Erwinia_amylovora_Ea1_79Sm	2#Erwinia_amylovora_Ea1_98	questionable
Erwinia_amylovora_Ea1_79Sm	2#Erwinia_amylovora_Ea3_97	questionable
Erwinia_amylovora_Ea1_79Sm	2#Erwinia_amylovora_Ea7_96	intact
Erwinia_amylovora_Ea1_79Sm	3#Erwinia_amylovora_Ea04_03	questionable
Erwinia_amylovora_Ea1_79Sm	3#Erwinia_amylovora_Ea1_00	questionable
Erwinia_amylovora_Ea1_79Sm	3#Erwinia_amylovora_Ea1_97	questionable
Erwinia_amylovora_Ea1_79Sm	3#Erwinia_amylovora_Ea2_97	questionable
Erwinia_amylovora_Ea1_79Sm	4#Erwinia_amylovora_E2006P	intact
Erwinia_amylovora_Ea1_79Sm	4#Erwinia_amylovora_Ea6_96	questionable
Erwinia_amylovora_Ea1_79Sm	4#Erwinia_sp_Ejp617	incomplete
Erwinia_amylovora_Ea1_95	1#Erwinia_amylovora_Ea3_97	intact
Erwinia_amylovora_Ea1_95	2#Erwinia_amylovora_Ea2_97	intact
Erwinia_amylovora_Ea1_95	3#Erwinia_amylovora_Ea4_96	intact
Erwinia_amylovora_Ea1_97	1#Erwinia_amylovora_Ea123_5_51	intact
Erwinia_amylovora_Ea1_97	1#Erwinia_amylovora_Ea3_97	intact
Erwinia_amylovora_Ea1_97	2#Erwinia_amylovora_Ea2_97	intact
Erwinia_amylovora_Ea1_97	2#Erwinia_psidii_IBSBF_435	intact
Erwinia_amylovora_Ea1_97	3#Erwinia_amylovora_Ea4_96	intact
Erwinia_amylovora_Ea1_97	3#Erwinia_amylovora_Ea6_96	incomplete
Erwinia_amylovora_Ea1_97	4#Erwinia_amylovora_Ea8_96	incomplete
Erwinia_amylovora_Ea1_98	14#Erwinia_tracheiphila_BHKY	intact
Erwinia_amylovora_Ea1_98	15#Erwinia_tracheiphila_BuffGH	intact
Erwinia_amylovora_Ea1_98	1#Erwinia_amylovora_Ea3_97	intact
Erwinia_amylovora_Ea1_98	27#Erwinia_tracheiphila_MDCuke	intact
Erwinia_amylovora_Ea1_98	27#Erwinia_tracheiphila_SCR3	intact
Erwinia_amylovora_Ea1_98	2#Erwinia_amylovora_Ea2_97	intact
Erwinia_amylovora_Ea1_98	3#Erwinia_amylovora_Ea4_96	intact
Erwinia_amylovora_EA110	1#Erwinia_amylovora_Ea01_03	questionable
Erwinia_amylovora_EA110	1#Erwinia_amylovora_Ea02_03	intact
Erwinia_amylovora_EA110	1#Erwinia_amylovora_Ea4_96	questionable
Erwinia_amylovora_EA110	1#Erwinia_amylovora_Ea8_96	questionable
Erwinia_amylovora_EA110	2#Erwinia_amylovora_Ea03_03	intact
Erwinia_amylovora_EA110	2#Erwinia_amylovora_Ea1_95	intact
Erwinia_amylovora_EA110	2#Erwinia_amylovora_Ea1_98	questionable
Erwinia_amylovora_EA110	2#Erwinia_amylovora_Ea3_97	questionable
Erwinia_amylovora_EA110	2#Erwinia_amylovora_Ea7_96	intact
Erwinia_amylovora_EA110	3#Erwinia_amylovora_Ea04_03	questionable
Erwinia_amylovora_EA110	3#Erwinia_amylovora_Ea1_00	questionable
Erwinia_amylovora_EA110	3#Erwinia_amylovora_Ea1_97	questionable
Erwinia_amylovora_EA110	3#Erwinia_amylovora_Ea2_97	questionable
Erwinia_amylovora_EA110	4#Erwinia_amylovora_E2006P	intact
Erwinia_amylovora_EA110	4#Erwinia_amylovora_Ea6_96	questionable
Erwinia_amylovora_EA110	4#Erwinia_sp_Ejp617	incomplete
Erwinia_amylovora_Ea116_5_29	1#Erwinia_amylovora_Ea01_03	questionable
Erwinia_amylovora_Ea116_5_29	1#Erwinia_amylovora_Ea02_03	intact
Erwinia_amylovora_Ea116_5_29	1#Erwinia_amylovora_Ea4_96	questionable
Erwinia_amylovora_Ea116_5_29	1#Erwinia_amylovora_Ea8_96	questionable
Erwinia_amylovora_Ea116_5_29	2#Erwinia_amylovora_Ea03_03	intact
Erwinia_amylovora_Ea116_5_29	2#Erwinia_amylovora_Ea1_95	intact
Erwinia_amylovora_Ea116_5_29	2#Erwinia_amylovora_Ea1_98	questionable
Erwinia_amylovora_Ea116_5_29	2#Erwinia_amylovora_Ea3_97	questionable
Erwinia_amylovora_Ea116_5_29	2#Erwinia_amylovora_Ea7_96	intact
Erwinia_amylovora_Ea116_5_29	3#Erwinia_amylovora_Ea04_03	questionable
Erwinia_amylovora_Ea116_5_29	3#Erwinia_amylovora_Ea1_00	questionable
Erwinia_amylovora_Ea116_5_29	3#Erwinia_amylovora_Ea1_97	questionable
Erwinia_amylovora_Ea116_5_29	3#Erwinia_amylovora_Ea2_97	questionable
Erwinia_amylovora_Ea116_5_29	4#Erwinia_amylovora_E2006P	intact
Erwinia_amylovora_Ea116_5_29	4#Erwinia_amylovora_Ea6_96	questionable
Erwinia_amylovora_Ea116_5_29	4#Erwinia_sp_Ejp617	incomplete
Erwinia_amylovora_Ea1189	1#Erwinia_amylovora_Ea01_03	questionable
Erwinia_amylovora_Ea1189	1#Erwinia_amylovora_Ea02_03	intact
Erwinia_amylovora_Ea1189	1#Erwinia_amylovora_Ea4_96	questionable
Erwinia_amylovora_Ea1189	1#Erwinia_amylovora_Ea8_96	questionable
Erwinia_amylovora_Ea1189	2#Erwinia_amylovora_Ea03_03	intact
Erwinia_amylovora_Ea1189	2#Erwinia_amylovora_Ea1_95	intact
Erwinia_amylovora_Ea1189	2#Erwinia_amylovora_Ea1_98	questionable
Erwinia_amylovora_Ea1189	2#Erwinia_amylovora_Ea3_97	questionable
Erwinia_amylovora_Ea1189	2#Erwinia_amylovora_Ea7_96	intact
Erwinia_amylovora_Ea1189	3#Erwinia_amylovora_Ea04_03	questionable
Erwinia_amylovora_Ea1189	3#Erwinia_amylovora_Ea1_00	questionable
Erwinia_amylovora_Ea1189	3#Erwinia_amylovora_Ea1_97	questionable
Erwinia_amylovora_Ea1189	3#Erwinia_amylovora_Ea2_97	questionable
Erwinia_amylovora_Ea1189	4#Erwinia_amylovora_E2006P	intact
Erwinia_amylovora_Ea1189	4#Erwinia_amylovora_Ea6_96	questionable
Erwinia_amylovora_Ea1189	4#Erwinia_sp_Ejp617	incomplete
Erwinia_amylovora_Ea12	1#Erwinia_amylovora_Ea01_03	questionable
Erwinia_amylovora_Ea12	1#Erwinia_amylovora_Ea02_03	intact
Erwinia_amylovora_Ea12	1#Erwinia_amylovora_Ea3_97	intact
Erwinia_amylovora_Ea12	1#Erwinia_amylovora_Ea4_96	questionable
Erwinia_amylovora_Ea12	1#Erwinia_amylovora_Ea8_96	questionable
Erwinia_amylovora_Ea12	2#Erwinia_amylovora_Ea03_03	intact
Erwinia_amylovora_Ea12	2#Erwinia_amylovora_Ea1_95	intact
Erwinia_amylovora_Ea12	2#Erwinia_amylovora_Ea1_98	questionable
Erwinia_amylovora_Ea12	2#Erwinia_amylovora_Ea2_97	intact
Erwinia_amylovora_Ea12	2#Erwinia_amylovora_Ea3_97	questionable
Erwinia_amylovora_Ea12	2#Erwinia_amylovora_Ea7_96	intact
Erwinia_amylovora_Ea12	3#Erwinia_amylovora_Ea04_03	questionable
Erwinia_amylovora_Ea12	3#Erwinia_amylovora_Ea1_00	questionable
Erwinia_amylovora_Ea12	3#Erwinia_amylovora_Ea1_97	questionable
Erwinia_amylovora_Ea12	3#Erwinia_amylovora_Ea2_97	questionable
Erwinia_amylovora_Ea12	3#Erwinia_amylovora_Ea4_96	intact
Erwinia_amylovora_Ea12	4#Erwinia_amylovora_E2006P	intact
Erwinia_amylovora_Ea12	4#Erwinia_amylovora_Ea6_96	questionable
Erwinia_amylovora_Ea12	4#Erwinia_sp_Ejp617	incomplete
Erwinia_amylovora_Ea160_3_51	1#Erwinia_amylovora_Ea01_03	questionable
Erwinia_amylovora_Ea160_3_51	1#Erwinia_amylovora_Ea02_03	intact
Erwinia_amylovora_Ea160_3_51	1#Erwinia_amylovora_Ea3_97	intact
Erwinia_amylovora_Ea160_3_51	1#Erwinia_amylovora_Ea4_96	questionable
Erwinia_amylovora_Ea160_3_51	1#Erwinia_amylovora_Ea8_96	questionable
Erwinia_amylovora_Ea160_3_51	2#Erwinia_amylovora_Ea03_03	intact
Erwinia_amylovora_Ea160_3_51	2#Erwinia_amylovora_Ea1_95	intact
Erwinia_amylovora_Ea160_3_51	2#Erwinia_amylovora_Ea1_98	questionable
Erwinia_amylovora_Ea160_3_51	2#Erwinia_amylovora_Ea2_97	intact
Erwinia_amylovora_Ea160_3_51	2#Erwinia_amylovora_Ea3_97	questionable
Erwinia_amylovora_Ea160_3_51	2#Erwinia_amylovora_Ea7_96	intact
Erwinia_amylovora_Ea160_3_51	3#Erwinia_amylovora_Ea04_03	questionable
Erwinia_amylovora_Ea160_3_51	3#Erwinia_amylovora_Ea1_00	questionable
Erwinia_amylovora_Ea160_3_51	3#Erwinia_amylovora_Ea1_97	questionable
Erwinia_amylovora_Ea160_3_51	3#Erwinia_amylovora_Ea2_97	questionable
Erwinia_amylovora_Ea160_3_51	3#Erwinia_amylovora_Ea4_96	intact
Erwinia_amylovora_Ea160_3_51	4#Erwinia_amylovora_E2006P	intact
Erwinia_amylovora_Ea160_3_51	4#Erwinia_amylovora_Ea6_96	questionable
Erwinia_amylovora_Ea160_3_51	4#Erwinia_sp_Ejp617	incomplete
Erwinia_amylovora_Ea160_4_51	1#Erwinia_amylovora_Ea02_03	intact
Erwinia_amylovora_Ea160_4_51	1#Erwinia_amylovora_Ea123_5_51	intact
Erwinia_amylovora_Ea160_4_51	1#Erwinia_amylovora_Ea4_96	questionable
Erwinia_amylovora_Ea160_4_51	1#Erwinia_amylovora_Ea644	questionable
Erwinia_amylovora_Ea160_4_51	2#Erwinia_amylovora_Ea03_03	intact
Erwinia_amylovora_Ea160_4_51	2#Erwinia_amylovora_Ea1_95	intact
Erwinia_amylovora_Ea160_4_51	2#Erwinia_amylovora_Ea3_97	questionable
Erwinia_amylovora_Ea160_4_51	2#Erwinia_amylovora_Ea7_96	intact
Erwinia_amylovora_Ea160_4_51	3#Erwinia_amylovora_Ea1_97	questionable
Erwinia_amylovora_Ea169	1#Erwinia_amylovora_Ea01_03	questionable
Erwinia_amylovora_Ea169	1#Erwinia_amylovora_Ea02_03	intact
Erwinia_amylovora_Ea169	1#Erwinia_amylovora_Ea4_96	questionable
Erwinia_amylovora_Ea169	1#Erwinia_amylovora_Ea8_96	questionable
Erwinia_amylovora_Ea169	2#Erwinia_amylovora_Ea03_03	intact
Erwinia_amylovora_Ea169	2#Erwinia_amylovora_Ea1_95	intact
Erwinia_amylovora_Ea169	2#Erwinia_amylovora_Ea1_98	questionable
Erwinia_amylovora_Ea169	2#Erwinia_amylovora_Ea3_97	questionable
Erwinia_amylovora_Ea169	2#Erwinia_amylovora_Ea7_96	intact
Erwinia_amylovora_Ea169	3#Erwinia_amylovora_Ea04_03	questionable
Erwinia_amylovora_Ea169	3#Erwinia_amylovora_Ea1_00	questionable
Erwinia_amylovora_Ea169	3#Erwinia_amylovora_Ea1_97	questionable
Erwinia_amylovora_Ea169	3#Erwinia_amylovora_Ea2_97	questionable
Erwinia_amylovora_Ea169	4#Erwinia_amylovora_E2006P	intact
Erwinia_amylovora_Ea169	4#Erwinia_amylovora_Ea6_96	questionable
Erwinia_amylovora_Ea169	4#Erwinia_sp_Ejp617	incomplete
Erwinia_amylovora_Ea17_1_1	1#Erwinia_amylovora_Ea01_03	questionable
Erwinia_amylovora_Ea17_1_1	1#Erwinia_amylovora_Ea02_03	intact
Erwinia_amylovora_Ea17_1_1	1#Erwinia_amylovora_Ea4_96	questionable
Erwinia_amylovora_Ea17_1_1	1#Erwinia_amylovora_Ea8_96	questionable
Erwinia_amylovora_Ea17_1_1	2#Erwinia_amylovora_Ea03_03	intact
Erwinia_amylovora_Ea17_1_1	2#Erwinia_amylovora_Ea1_95	intact
Erwinia_amylovora_Ea17_1_1	2#Erwinia_amylovora_Ea1_98	questionable
Erwinia_amylovora_Ea17_1_1	2#Erwinia_amylovora_Ea3_97	questionable
Erwinia_amylovora_Ea17_1_1	2#Erwinia_amylovora_Ea7_96	intact
Erwinia_amylovora_Ea17_1_1	3#Erwinia_amylovora_Ea04_03	questionable
Erwinia_amylovora_Ea17_1_1	3#Erwinia_amylovora_Ea1_00	questionable
Erwinia_amylovora_Ea17_1_1	3#Erwinia_amylovora_Ea1_97	questionable
Erwinia_amylovora_Ea17_1_1	3#Erwinia_amylovora_Ea2_97	questionable
Erwinia_amylovora_Ea17_1_1	4#Erwinia_amylovora_E2006P	intact
Erwinia_amylovora_Ea17_1_1	4#Erwinia_amylovora_Ea6_96	questionable
Erwinia_amylovora_Ea17_1_1	4#Erwinia_sp_Ejp617	incomplete
Erwinia_amylovora_Ea2_95	1#Erwinia_amylovora_Ea01_03	questionable
Erwinia_amylovora_Ea2_95	1#Erwinia_amylovora_Ea02_03	intact
Erwinia_amylovora_Ea2_95	1#Erwinia_amylovora_Ea3_97	intact
Erwinia_amylovora_Ea2_95	2#Erwinia_amylovora_Ea03_03	intact
Erwinia_amylovora_Ea2_95	2#Erwinia_amylovora_Ea2_97	intact
Erwinia_amylovora_Ea2_95	3#Erwinia_amylovora_Ea1_00	questionable
Erwinia_amylovora_Ea2_95	3#Erwinia_amylovora_Ea4_96	intact
Erwinia_amylovora_Ea2_95	4#Erwinia_amylovora_E2006P	intact
Erwinia_amylovora_Ea2_97	1#Erwinia_amylovora_Ea123_5_51	intact
Erwinia_amylovora_Ea2_97	3#Erwinia_amylovora_Ea6_96	incomplete
Erwinia_amylovora_Ea2_97	4#Erwinia_amylovora_Ea8_96	incomplete
Erwinia_amylovora_Ea29_7	1#Erwinia_amylovora_Ea01_03	questionable
Erwinia_amylovora_Ea29_7	1#Erwinia_amylovora_Ea02_03	intact
Erwinia_amylovora_Ea29_7	1#Erwinia_amylovora_Ea4_96	questionable
Erwinia_amylovora_Ea29_7	1#Erwinia_amylovora_Ea8_96	questionable
Erwinia_amylovora_Ea29_7	2#Erwinia_amylovora_Ea03_03	intact
Erwinia_amylovora_Ea29_7	2#Erwinia_amylovora_Ea1_95	intact
Erwinia_amylovora_Ea29_7	2#Erwinia_amylovora_Ea1_98	questionable
Erwinia_amylovora_Ea29_7	2#Erwinia_amylovora_Ea3_97	questionable
Erwinia_amylovora_Ea29_7	2#Erwinia_amylovora_Ea7_96	intact
Erwinia_amylovora_Ea29_7	3#Erwinia_amylovora_Ea04_03	questionable
Erwinia_amylovora_Ea29_7	3#Erwinia_amylovora_Ea1_00	questionable
Erwinia_amylovora_Ea29_7	3#Erwinia_amylovora_Ea1_97	questionable
Erwinia_amylovora_Ea29_7	3#Erwinia_amylovora_Ea2_97	questionable
Erwinia_amylovora_Ea29_7	4#Erwinia_amylovora_E2006P	intact
Erwinia_amylovora_Ea29_7	4#Erwinia_amylovora_Ea6_96	questionable
Erwinia_amylovora_Ea29_7	4#Erwinia_sp_Ejp617	incomplete
Erwinia_amylovora_Ea3_97	1#Erwinia_amylovora_Ea123_5_51	intact
Erwinia_amylovora_Ea3_97	3#Erwinia_amylovora_Ea6_96	incomplete
Erwinia_amylovora_Ea3_97	4#Erwinia_amylovora_Ea8_96	incomplete
Erwinia_amylovora_Ea315_1	1#Erwinia_amylovora_Ea01_03	questionable
Erwinia_amylovora_Ea315_1	1#Erwinia_amylovora_Ea02_03	intact
Erwinia_amylovora_Ea315_1	1#Erwinia_amylovora_Ea4_96	questionable
Erwinia_amylovora_Ea315_1	1#Erwinia_amylovora_Ea8_96	questionable
Erwinia_amylovora_Ea315_1	2#Erwinia_amylovora_Ea03_03	intact
Erwinia_amylovora_Ea315_1	2#Erwinia_amylovora_Ea1_95	intact
Erwinia_amylovora_Ea315_1	2#Erwinia_amylovora_Ea1_98	questionable
Erwinia_amylovora_Ea315_1	2#Erwinia_amylovora_Ea3_97	questionable
Erwinia_amylovora_Ea315_1	2#Erwinia_amylovora_Ea7_96	intact
Erwinia_amylovora_Ea315_1	3#Erwinia_amylovora_Ea04_03	questionable
Erwinia_amylovora_Ea315_1	3#Erwinia_amylovora_Ea1_00	questionable
Erwinia_amylovora_Ea315_1	3#Erwinia_amylovora_Ea1_97	questionable
Erwinia_amylovora_Ea315_1	3#Erwinia_amylovora_Ea2_97	questionable
Erwinia_amylovora_Ea315_1	4#Erwinia_amylovora_E2006P	intact
Erwinia_amylovora_Ea315_1	4#Erwinia_amylovora_Ea6_96	questionable
Erwinia_amylovora_Ea315_1	4#Erwinia_sp_Ejp617	incomplete
Erwinia_amylovora_Ea321	1#Erwinia_amylovora_Ea01_03	questionable
Erwinia_amylovora_Ea321	1#Erwinia_amylovora_Ea02_03	intact
Erwinia_amylovora_Ea321	1#Erwinia_amylovora_Ea4_96	questionable
Erwinia_amylovora_Ea321	1#Erwinia_amylovora_Ea8_96	questionable
Erwinia_amylovora_Ea321	2#Erwinia_amylovora_Ea03_03	intact
Erwinia_amylovora_Ea321	2#Erwinia_amylovora_Ea1_95	intact
Erwinia_amylovora_Ea321	2#Erwinia_amylovora_Ea1_98	questionable
Erwinia_amylovora_Ea321	2#Erwinia_amylovora_Ea3_97	questionable
Erwinia_amylovora_Ea321	2#Erwinia_amylovora_Ea7_96	intact
Erwinia_amylovora_Ea321	3#Erwinia_amylovora_Ea04_03	questionable
Erwinia_amylovora_Ea321	3#Erwinia_amylovora_Ea1_00	questionable
Erwinia_amylovora_Ea321	3#Erwinia_amylovora_Ea1_97	questionable
Erwinia_amylovora_Ea321	3#Erwinia_amylovora_Ea2_97	questionable
Erwinia_amylovora_Ea321	4#Erwinia_amylovora_E2006P	intact
Erwinia_amylovora_Ea321	4#Erwinia_amylovora_Ea6_96	questionable
Erwinia_amylovora_Ea321	4#Erwinia_sp_Ejp617	incomplete
Erwinia_amylovora_Ea356	1#Erwinia_amylovora_Ea01_03	questionable
Erwinia_amylovora_Ea356	1#Erwinia_amylovora_Ea02_03	intact
Erwinia_amylovora_Ea356	1#Erwinia_amylovora_Ea4_96	questionable
Erwinia_amylovora_Ea356	1#Erwinia_amylovora_Ea8_96	questionable
Erwinia_amylovora_Ea356	2#Erwinia_amylovora_Ea03_03	intact
Erwinia_amylovora_Ea356	2#Erwinia_amylovora_Ea1_95	intact
Erwinia_amylovora_Ea356	2#Erwinia_amylovora_Ea1_98	questionable
Erwinia_amylovora_Ea356	2#Erwinia_amylovora_Ea3_97	questionable
Erwinia_amylovora_Ea356	2#Erwinia_amylovora_Ea7_96	intact
Erwinia_amylovora_Ea356	3#Erwinia_amylovora_Ea04_03	questionable
Erwinia_amylovora_Ea356	3#Erwinia_amylovora_Ea1_00	questionable
Erwinia_amylovora_Ea356	3#Erwinia_amylovora_Ea1_97	questionable
Erwinia_amylovora_Ea356	3#Erwinia_amylovora_Ea2_97	questionable
Erwinia_amylovora_Ea356	4#Erwinia_amylovora_E2006P	intact
Erwinia_amylovora_Ea356	4#Erwinia_amylovora_Ea6_96	questionable
Erwinia_amylovora_Ea356	4#Erwinia_sp_Ejp617	incomplete
Erwinia_amylovora_Ea367	1#Erwinia_amylovora_Ea01_03	questionable
Erwinia_amylovora_Ea367	1#Erwinia_amylovora_Ea02_03	intact
Erwinia_amylovora_Ea367	1#Erwinia_amylovora_Ea4_96	questionable
Erwinia_amylovora_Ea367	1#Erwinia_amylovora_Ea8_96	questionable
Erwinia_amylovora_Ea367	2#Erwinia_amylovora_Ea03_03	intact
Erwinia_amylovora_Ea367	2#Erwinia_amylovora_Ea1_95	intact
Erwinia_amylovora_Ea367	2#Erwinia_amylovora_Ea1_98	questionable
Erwinia_amylovora_Ea367	2#Erwinia_amylovora_Ea3_97	questionable
Erwinia_amylovora_Ea367	2#Erwinia_amylovora_Ea7_96	intact
Erwinia_amylovora_Ea367	3#Erwinia_amylovora_Ea04_03	questionable
Erwinia_amylovora_Ea367	3#Erwinia_amylovora_Ea1_00	questionable
Erwinia_amylovora_Ea367	3#Erwinia_amylovora_Ea1_97	questionable
Erwinia_amylovora_Ea367	3#Erwinia_amylovora_Ea2_97	questionable
Erwinia_amylovora_Ea367	4#Erwinia_amylovora_E2006P	intact
Erwinia_amylovora_Ea367	4#Erwinia_amylovora_Ea6_96	questionable
Erwinia_amylovora_Ea367	4#Erwinia_sp_Ejp617	incomplete
Erwinia_amylovora_Ea3a_H1_II	1#Erwinia_amylovora_Ea01_03	questionable
Erwinia_amylovora_Ea3a_H1_II	1#Erwinia_amylovora_Ea02_03	intact
Erwinia_amylovora_Ea3a_H1_II	1#Erwinia_amylovora_Ea4_96	questionable
Erwinia_amylovora_Ea3a_H1_II	1#Erwinia_amylovora_Ea8_96	questionable
Erwinia_amylovora_Ea3a_H1_II	2#Erwinia_amylovora_Ea03_03	intact
Erwinia_amylovora_Ea3a_H1_II	2#Erwinia_amylovora_Ea1_95	intact
Erwinia_amylovora_Ea3a_H1_II	2#Erwinia_amylovora_Ea1_98	questionable
Erwinia_amylovora_Ea3a_H1_II	2#Erwinia_amylovora_Ea3_97	questionable
Erwinia_amylovora_Ea3a_H1_II	2#Erwinia_amylovora_Ea7_96	intact
Erwinia_amylovora_Ea3a_H1_II	3#Erwinia_amylovora_Ea04_03	questionable
Erwinia_amylovora_Ea3a_H1_II	3#Erwinia_amylovora_Ea1_00	questionable
Erwinia_amylovora_Ea3a_H1_II	3#Erwinia_amylovora_Ea1_97	questionable
Erwinia_amylovora_Ea3a_H1_II	3#Erwinia_amylovora_Ea2_97	questionable
Erwinia_amylovora_Ea3a_H1_II	4#Erwinia_amylovora_E2006P	intact
Erwinia_amylovora_Ea3a_H1_II	4#Erwinia_amylovora_Ea6_96	questionable
Erwinia_amylovora_Ea3a_H1_II	4#Erwinia_sp_Ejp617	incomplete
Erwinia_amylovora_Ea4_96	1#Erwinia_amylovora_Ea123_5_51	intact
Erwinia_amylovora_Ea4_96	3#Erwinia_amylovora_Ea6_96	incomplete
Erwinia_amylovora_Ea4_96	4#Erwinia_amylovora_Ea8_96	incomplete
Erwinia_amylovora_Ea4_97	1#Erwinia_amylovora_Ea01_03	questionable
Erwinia_amylovora_Ea4_97	1#Erwinia_amylovora_Ea02_03	intact
Erwinia_amylovora_Ea4_97	1#Erwinia_amylovora_Ea4_96	questionable
Erwinia_amylovora_Ea4_97	1#Erwinia_amylovora_Ea8_96	questionable
Erwinia_amylovora_Ea4_97	2#Erwinia_amylovora_Ea03_03	intact
Erwinia_amylovora_Ea4_97	2#Erwinia_amylovora_Ea1_95	intact
Erwinia_amylovora_Ea4_97	2#Erwinia_amylovora_Ea1_98	questionable
Erwinia_amylovora_Ea4_97	2#Erwinia_amylovora_Ea3_97	questionable
Erwinia_amylovora_Ea4_97	2#Erwinia_amylovora_Ea7_96	intact
Erwinia_amylovora_Ea4_97	3#Erwinia_amylovora_Ea04_03	questionable
Erwinia_amylovora_Ea4_97	3#Erwinia_amylovora_Ea1_00	questionable
Erwinia_amylovora_Ea4_97	3#Erwinia_amylovora_Ea1_97	questionable
Erwinia_amylovora_Ea4_97	3#Erwinia_amylovora_Ea2_97	questionable
Erwinia_amylovora_Ea4_97	4#Erwinia_amylovora_E2006P	intact
Erwinia_amylovora_Ea4_97	4#Erwinia_amylovora_Ea6_96	questionable
Erwinia_amylovora_Ea4_97	4#Erwinia_sp_Ejp617	incomplete
Erwinia_amylovora_Ea433	1#Erwinia_amylovora_Ea01_03	questionable
Erwinia_amylovora_Ea433	1#Erwinia_amylovora_Ea02_03	intact
Erwinia_amylovora_Ea433	1#Erwinia_amylovora_Ea3_97	intact
Erwinia_amylovora_Ea433	1#Erwinia_amylovora_Ea4_96	questionable
Erwinia_amylovora_Ea433	1#Erwinia_amylovora_Ea8_96	questionable
Erwinia_amylovora_Ea433	2#Erwinia_amylovora_Ea03_03	intact
Erwinia_amylovora_Ea433	2#Erwinia_amylovora_Ea1_95	intact
Erwinia_amylovora_Ea433	2#Erwinia_amylovora_Ea1_98	questionable
Erwinia_amylovora_Ea433	2#Erwinia_amylovora_Ea2_97	intact
Erwinia_amylovora_Ea433	2#Erwinia_amylovora_Ea3_97	questionable
Erwinia_amylovora_Ea433	2#Erwinia_amylovora_Ea7_96	intact
Erwinia_amylovora_Ea433	3#Erwinia_amylovora_Ea04_03	questionable
Erwinia_amylovora_Ea433	3#Erwinia_amylovora_Ea1_00	questionable
Erwinia_amylovora_Ea433	3#Erwinia_amylovora_Ea1_97	questionable
Erwinia_amylovora_Ea433	3#Erwinia_amylovora_Ea2_97	questionable
Erwinia_amylovora_Ea433	3#Erwinia_amylovora_Ea4_96	intact
Erwinia_amylovora_Ea433	4#Erwinia_amylovora_E2006P	intact
Erwinia_amylovora_Ea433	4#Erwinia_amylovora_Ea6_96	questionable
Erwinia_amylovora_Ea433	4#Erwinia_sp_Ejp617	incomplete
Erwinia_amylovora_Ea435	1#Erwinia_amylovora_Ea01_03	questionable
Erwinia_amylovora_Ea435	1#Erwinia_amylovora_Ea02_03	intact
Erwinia_amylovora_Ea435	1#Erwinia_amylovora_Ea4_96	questionable
Erwinia_amylovora_Ea435	1#Erwinia_amylovora_Ea8_96	questionable
Erwinia_amylovora_Ea435	2#Erwinia_amylovora_Ea03_03	intact
Erwinia_amylovora_Ea435	2#Erwinia_amylovora_Ea1_95	intact
Erwinia_amylovora_Ea435	2#Erwinia_amylovora_Ea1_98	questionable
Erwinia_amylovora_Ea435	2#Erwinia_amylovora_Ea3_97	questionable
Erwinia_amylovora_Ea435	2#Erwinia_amylovora_Ea7_96	intact
Erwinia_amylovora_Ea435	3#Erwinia_amylovora_Ea04_03	questionable
Erwinia_amylovora_Ea435	3#Erwinia_amylovora_Ea1_00	questionable
Erwinia_amylovora_Ea435	3#Erwinia_amylovora_Ea1_97	questionable
Erwinia_amylovora_Ea435	3#Erwinia_amylovora_Ea2_97	questionable
Erwinia_amylovora_Ea435	4#Erwinia_amylovora_E2006P	intact
Erwinia_amylovora_Ea435	4#Erwinia_amylovora_Ea6_96	questionable
Erwinia_amylovora_Ea435	4#Erwinia_sp_Ejp617	incomplete
Erwinia_amylovora_Ea440	1#Erwinia_amylovora_Ea01_03	questionable
Erwinia_amylovora_Ea440	1#Erwinia_amylovora_Ea02_03	intact
Erwinia_amylovora_Ea440	1#Erwinia_amylovora_Ea4_96	questionable
Erwinia_amylovora_Ea440	1#Erwinia_amylovora_Ea8_96	questionable
Erwinia_amylovora_Ea440	2#Erwinia_amylovora_Ea03_03	intact
Erwinia_amylovora_Ea440	2#Erwinia_amylovora_Ea1_95	intact
Erwinia_amylovora_Ea440	2#Erwinia_amylovora_Ea1_98	questionable
Erwinia_amylovora_Ea440	2#Erwinia_amylovora_Ea3_97	questionable
Erwinia_amylovora_Ea440	2#Erwinia_amylovora_Ea7_96	intact
Erwinia_amylovora_Ea440	3#Erwinia_amylovora_Ea04_03	questionable
Erwinia_amylovora_Ea440	3#Erwinia_amylovora_Ea1_00	questionable
Erwinia_amylovora_Ea440	3#Erwinia_amylovora_Ea1_97	questionable
Erwinia_amylovora_Ea440	3#Erwinia_amylovora_Ea2_97	questionable
Erwinia_amylovora_Ea440	4#Erwinia_amylovora_E2006P	intact
Erwinia_amylovora_Ea440	4#Erwinia_amylovora_Ea6_96	questionable
Erwinia_amylovora_Ea440	4#Erwinia_sp_Ejp617	incomplete
Erwinia_amylovora_Ea464	1#Erwinia_amylovora_Ea01_03	questionable
Erwinia_amylovora_Ea464	1#Erwinia_amylovora_Ea02_03	intact
Erwinia_amylovora_Ea464	1#Erwinia_amylovora_Ea4_96	questionable
Erwinia_amylovora_Ea464	1#Erwinia_amylovora_Ea8_96	questionable
Erwinia_amylovora_Ea464	2#Erwinia_amylovora_Ea03_03	intact
Erwinia_amylovora_Ea464	2#Erwinia_amylovora_Ea1_95	intact
Erwinia_amylovora_Ea464	2#Erwinia_amylovora_Ea1_98	questionable
Erwinia_amylovora_Ea464	2#Erwinia_amylovora_Ea3_97	questionable
Erwinia_amylovora_Ea464	2#Erwinia_amylovora_Ea7_96	intact
Erwinia_amylovora_Ea464	3#Erwinia_amylovora_Ea04_03	questionable
Erwinia_amylovora_Ea464	3#Erwinia_amylovora_Ea1_00	questionable
Erwinia_amylovora_Ea464	3#Erwinia_amylovora_Ea1_97	questionable
Erwinia_amylovora_Ea464	3#Erwinia_amylovora_Ea2_97	questionable
Erwinia_amylovora_Ea464	4#Erwinia_amylovora_E2006P	intact
Erwinia_amylovora_Ea464	4#Erwinia_amylovora_Ea6_96	questionable
Erwinia_amylovora_Ea464	4#Erwinia_sp_Ejp617	incomplete
Erwinia_amylovora_Ea5_97	1#Erwinia_amylovora_Ea01_03	questionable
Erwinia_amylovora_Ea5_97	1#Erwinia_amylovora_Ea02_03	intact
Erwinia_amylovora_Ea5_97	1#Erwinia_amylovora_Ea4_96	questionable
Erwinia_amylovora_Ea5_97	1#Erwinia_amylovora_Ea8_96	questionable
Erwinia_amylovora_Ea5_97	2#Erwinia_amylovora_Ea03_03	intact
Erwinia_amylovora_Ea5_97	2#Erwinia_amylovora_Ea1_95	intact
Erwinia_amylovora_Ea5_97	2#Erwinia_amylovora_Ea1_98	questionable
Erwinia_amylovora_Ea5_97	2#Erwinia_amylovora_Ea3_97	questionable
Erwinia_amylovora_Ea5_97	2#Erwinia_amylovora_Ea7_96	intact
Erwinia_amylovora_Ea5_97	3#Erwinia_amylovora_Ea04_03	questionable
Erwinia_amylovora_Ea5_97	3#Erwinia_amylovora_Ea1_00	questionable
Erwinia_amylovora_Ea5_97	3#Erwinia_amylovora_Ea1_97	questionable
Erwinia_amylovora_Ea5_97	3#Erwinia_amylovora_Ea2_97	questionable
Erwinia_amylovora_Ea5_97	4#Erwinia_amylovora_E2006P	intact
Erwinia_amylovora_Ea5_97	4#Erwinia_amylovora_Ea6_96	questionable
Erwinia_amylovora_Ea5_97	4#Erwinia_sp_Ejp617	incomplete
Erwinia_amylovora_Ea6_4	1#Erwinia_amylovora_Ea01_03	questionable
Erwinia_amylovora_Ea6_4	1#Erwinia_amylovora_Ea02_03	intact
Erwinia_amylovora_Ea6_4	1#Erwinia_amylovora_Ea4_96	questionable
Erwinia_amylovora_Ea6_4	1#Erwinia_amylovora_Ea8_96	questionable
Erwinia_amylovora_Ea6_4	2#Erwinia_amylovora_Ea03_03	intact
Erwinia_amylovora_Ea6_4	2#Erwinia_amylovora_Ea1_95	intact
Erwinia_amylovora_Ea6_4	2#Erwinia_amylovora_Ea1_98	questionable
Erwinia_amylovora_Ea6_4	2#Erwinia_amylovora_Ea3_97	questionable
Erwinia_amylovora_Ea6_4	2#Erwinia_amylovora_Ea7_96	intact
Erwinia_amylovora_Ea6_4	3#Erwinia_amylovora_Ea04_03	questionable
Erwinia_amylovora_Ea6_4	3#Erwinia_amylovora_Ea1_00	questionable
Erwinia_amylovora_Ea6_4	3#Erwinia_amylovora_Ea1_97	questionable
Erwinia_amylovora_Ea6_4	3#Erwinia_amylovora_Ea2_97	questionable
Erwinia_amylovora_Ea6_4	4#Erwinia_amylovora_E2006P	intact
Erwinia_amylovora_Ea6_4	4#Erwinia_amylovora_Ea6_96	questionable
Erwinia_amylovora_Ea6_4	4#Erwinia_sp_Ejp617	incomplete
Erwinia_amylovora_Ea6_96	1#Erwinia_amylovora_Ea3_97	intact
Erwinia_amylovora_Ea6_96	2#Erwinia_amylovora_Ea2_97	intact
Erwinia_amylovora_Ea6_96	3#Erwinia_amylovora_Ea4_96	intact
Erwinia_amylovora_Ea6_97	1#Erwinia_amylovora_Ea01_03	questionable
Erwinia_amylovora_Ea6_97	1#Erwinia_amylovora_Ea02_03	intact
Erwinia_amylovora_Ea6_97	1#Erwinia_amylovora_Ea4_96	questionable
Erwinia_amylovora_Ea6_97	1#Erwinia_amylovora_Ea8_96	questionable
Erwinia_amylovora_Ea6_97	2#Erwinia_amylovora_Ea03_03	intact
Erwinia_amylovora_Ea6_97	2#Erwinia_amylovora_Ea1_95	intact
Erwinia_amylovora_Ea6_97	2#Erwinia_amylovora_Ea1_98	questionable
Erwinia_amylovora_Ea6_97	2#Erwinia_amylovora_Ea3_97	questionable
Erwinia_amylovora_Ea6_97	2#Erwinia_amylovora_Ea7_96	intact
Erwinia_amylovora_Ea6_97	3#Erwinia_amylovora_Ea04_03	questionable
Erwinia_amylovora_Ea6_97	3#Erwinia_amylovora_Ea1_00	questionable
Erwinia_amylovora_Ea6_97	3#Erwinia_amylovora_Ea1_97	questionable
Erwinia_amylovora_Ea6_97	3#Erwinia_amylovora_Ea2_97	questionable
Erwinia_amylovora_Ea6_97	4#Erwinia_amylovora_E2006P	intact
Erwinia_amylovora_Ea6_97	4#Erwinia_amylovora_Ea6_96	questionable
Erwinia_amylovora_Ea6_97	4#Erwinia_sp_Ejp617	incomplete
Erwinia_amylovora_Ea644	1#Erwinia_amylovora_Ea3_97	intact
Erwinia_amylovora_Ea644	2#Erwinia_amylovora_Ea2_97	intact
Erwinia_amylovora_Ea644	3#Erwinia_amylovora_Ea4_96	intact
Erwinia_amylovora_Ea650	1#Erwinia_amylovora_Ea01_03	questionable
Erwinia_amylovora_Ea650	1#Erwinia_amylovora_Ea02_03	intact
Erwinia_amylovora_Ea650	1#Erwinia_amylovora_Ea4_96	questionable
Erwinia_amylovora_Ea650	1#Erwinia_amylovora_Ea8_96	questionable
Erwinia_amylovora_Ea650	2#Erwinia_amylovora_Ea03_03	intact
Erwinia_amylovora_Ea650	2#Erwinia_amylovora_Ea1_95	intact
Erwinia_amylovora_Ea650	2#Erwinia_amylovora_Ea1_98	questionable
Erwinia_amylovora_Ea650	2#Erwinia_amylovora_Ea3_97	questionable
Erwinia_amylovora_Ea650	2#Erwinia_amylovora_Ea7_96	intact
Erwinia_amylovora_Ea650	3#Erwinia_amylovora_Ea04_03	questionable
Erwinia_amylovora_Ea650	3#Erwinia_amylovora_Ea1_00	questionable
Erwinia_amylovora_Ea650	3#Erwinia_amylovora_Ea1_97	questionable
Erwinia_amylovora_Ea650	3#Erwinia_amylovora_Ea2_97	questionable
Erwinia_amylovora_Ea650	4#Erwinia_amylovora_E2006P	intact
Erwinia_amylovora_Ea650	4#Erwinia_amylovora_Ea6_96	questionable
Erwinia_amylovora_Ea650	4#Erwinia_sp_Ejp617	incomplete
Erwinia_amylovora_Ea7_96	1#Erwinia_amylovora_Ea3_97	intact
Erwinia_amylovora_Ea7_96	2#Erwinia_amylovora_Ea2_97	intact
Erwinia_amylovora_Ea7_96	3#Erwinia_amylovora_Ea4_96	intact
Erwinia_amylovora_Ea8_96	1#Erwinia_amylovora_Ea3_97	intact
Erwinia_amylovora_Ea8_96	2#Erwinia_amylovora_Ea2_97	intact
Erwinia_amylovora_Ea8_96	3#Erwinia_amylovora_Ea4_96	intact
Erwinia_amylovora_Ea92_1_1	1#Erwinia_amylovora_Ea01_03	questionable
Erwinia_amylovora_Ea92_1_1	1#Erwinia_amylovora_Ea02_03	intact
Erwinia_amylovora_Ea92_1_1	1#Erwinia_amylovora_Ea4_96	questionable
Erwinia_amylovora_Ea92_1_1	1#Erwinia_amylovora_Ea8_96	questionable
Erwinia_amylovora_Ea92_1_1	2#Erwinia_amylovora_Ea03_03	intact
Erwinia_amylovora_Ea92_1_1	2#Erwinia_amylovora_Ea1_95	intact
Erwinia_amylovora_Ea92_1_1	2#Erwinia_amylovora_Ea1_98	questionable
Erwinia_amylovora_Ea92_1_1	2#Erwinia_amylovora_Ea3_97	questionable
Erwinia_amylovora_Ea92_1_1	2#Erwinia_amylovora_Ea7_96	intact
Erwinia_amylovora_Ea92_1_1	3#Erwinia_amylovora_Ea04_03	questionable
Erwinia_amylovora_Ea92_1_1	3#Erwinia_amylovora_Ea1_00	questionable
Erwinia_amylovora_Ea92_1_1	3#Erwinia_amylovora_Ea1_97	questionable
Erwinia_amylovora_Ea92_1_1	3#Erwinia_amylovora_Ea2_97	questionable
Erwinia_amylovora_Ea92_1_1	4#Erwinia_amylovora_E2006P	intact
Erwinia_amylovora_Ea92_1_1	4#Erwinia_amylovora_Ea6_96	questionable
Erwinia_amylovora_Ea92_1_1	4#Erwinia_sp_Ejp617	incomplete
Erwinia_amylovora_Ea92_1_2	1#Erwinia_amylovora_Ea01_03	questionable
Erwinia_amylovora_Ea92_1_2	1#Erwinia_amylovora_Ea02_03	intact
Erwinia_amylovora_Ea92_1_2	1#Erwinia_amylovora_Ea4_96	questionable
Erwinia_amylovora_Ea92_1_2	1#Erwinia_amylovora_Ea8_96	questionable
Erwinia_amylovora_Ea92_1_2	2#Erwinia_amylovora_Ea03_03	intact
Erwinia_amylovora_Ea92_1_2	2#Erwinia_amylovora_Ea1_95	intact
Erwinia_amylovora_Ea92_1_2	2#Erwinia_amylovora_Ea1_98	questionable
Erwinia_amylovora_Ea92_1_2	2#Erwinia_amylovora_Ea3_97	questionable
Erwinia_amylovora_Ea92_1_2	2#Erwinia_amylovora_Ea7_96	intact
Erwinia_amylovora_Ea92_1_2	3#Erwinia_amylovora_Ea04_03	questionable
Erwinia_amylovora_Ea92_1_2	3#Erwinia_amylovora_Ea1_00	questionable
Erwinia_amylovora_Ea92_1_2	3#Erwinia_amylovora_Ea1_97	questionable
Erwinia_amylovora_Ea92_1_2	3#Erwinia_amylovora_Ea2_97	questionable
Erwinia_amylovora_Ea92_1_2	4#Erwinia_amylovora_E2006P	intact
Erwinia_amylovora_Ea92_1_2	4#Erwinia_amylovora_Ea6_96	questionable
Erwinia_amylovora_Ea92_1_2	4#Erwinia_sp_Ejp617	incomplete
Erwinia_amylovora_EaA_11	1#Erwinia_amylovora_Ea01_03	questionable
Erwinia_amylovora_EaA_11	1#Erwinia_amylovora_Ea02_03	intact
Erwinia_amylovora_EaA_11	1#Erwinia_amylovora_Ea4_96	questionable
Erwinia_amylovora_EaA_11	1#Erwinia_amylovora_Ea8_96	questionable
Erwinia_amylovora_EaA_11	2#Erwinia_amylovora_Ea03_03	intact
Erwinia_amylovora_EaA_11	2#Erwinia_amylovora_Ea1_95	intact
Erwinia_amylovora_EaA_11	2#Erwinia_amylovora_Ea1_98	questionable
Erwinia_amylovora_EaA_11	2#Erwinia_amylovora_Ea3_97	questionable
Erwinia_amylovora_EaA_11	2#Erwinia_amylovora_Ea7_96	intact
Erwinia_amylovora_EaA_11	3#Erwinia_amylovora_Ea04_03	questionable
Erwinia_amylovora_EaA_11	3#Erwinia_amylovora_Ea1_00	questionable
Erwinia_amylovora_EaA_11	3#Erwinia_amylovora_Ea1_97	questionable
Erwinia_amylovora_EaA_11	3#Erwinia_amylovora_Ea2_97	questionable
Erwinia_amylovora_EaA_11	4#Erwinia_amylovora_E2006P	intact
Erwinia_amylovora_EaA_11	4#Erwinia_amylovora_Ea6_96	questionable
Erwinia_amylovora_EaA_11	4#Erwinia_sp_Ejp617	incomplete
Erwinia_amylovora_EaB_110	1#Erwinia_amylovora_Ea01_03	questionable
Erwinia_amylovora_EaB_110	1#Erwinia_amylovora_Ea02_03	intact
Erwinia_amylovora_EaB_110	1#Erwinia_amylovora_Ea4_96	questionable
Erwinia_amylovora_EaB_110	1#Erwinia_amylovora_Ea8_96	questionable
Erwinia_amylovora_EaB_110	2#Erwinia_amylovora_Ea03_03	intact
Erwinia_amylovora_EaB_110	2#Erwinia_amylovora_Ea1_95	intact
Erwinia_amylovora_EaB_110	2#Erwinia_amylovora_Ea1_98	questionable
Erwinia_amylovora_EaB_110	2#Erwinia_amylovora_Ea3_97	questionable
Erwinia_amylovora_EaB_110	2#Erwinia_amylovora_Ea7_96	intact
Erwinia_amylovora_EaB_110	3#Erwinia_amylovora_Ea04_03	questionable
Erwinia_amylovora_EaB_110	3#Erwinia_amylovora_Ea1_00	questionable
Erwinia_amylovora_EaB_110	3#Erwinia_amylovora_Ea1_97	questionable
Erwinia_amylovora_EaB_110	3#Erwinia_amylovora_Ea2_97	questionable
Erwinia_amylovora_EaB_110	4#Erwinia_amylovora_E2006P	intact
Erwinia_amylovora_EaB_110	4#Erwinia_amylovora_Ea6_96	questionable
Erwinia_amylovora_EaB_110	4#Erwinia_sp_Ejp617	incomplete
Erwinia_amylovora_EaD_7	1#Erwinia_amylovora_Ea01_03	questionable
Erwinia_amylovora_EaD_7	1#Erwinia_amylovora_Ea02_03	intact
Erwinia_amylovora_EaD_7	1#Erwinia_amylovora_Ea4_96	questionable
Erwinia_amylovora_EaD_7	1#Erwinia_amylovora_Ea8_96	questionable
Erwinia_amylovora_EaD_7	2#Erwinia_amylovora_Ea03_03	intact
Erwinia_amylovora_EaD_7	2#Erwinia_amylovora_Ea1_95	intact
Erwinia_amylovora_EaD_7	2#Erwinia_amylovora_Ea1_98	questionable
Erwinia_amylovora_EaD_7	2#Erwinia_amylovora_Ea3_97	questionable
Erwinia_amylovora_EaD_7	2#Erwinia_amylovora_Ea7_96	intact
Erwinia_amylovora_EaD_7	3#Erwinia_amylovora_Ea04_03	questionable
Erwinia_amylovora_EaD_7	3#Erwinia_amylovora_Ea1_00	questionable
Erwinia_amylovora_EaD_7	3#Erwinia_amylovora_Ea1_97	questionable
Erwinia_amylovora_EaD_7	3#Erwinia_amylovora_Ea2_97	questionable
Erwinia_amylovora_EaD_7	4#Erwinia_amylovora_E2006P	intact
Erwinia_amylovora_EaD_7	4#Erwinia_amylovora_Ea6_96	questionable
Erwinia_amylovora_EaD_7	4#Erwinia_sp_Ejp617	incomplete
Erwinia_amylovora_EaG5	1#Erwinia_amylovora_Ea01_03	questionable
Erwinia_amylovora_EaG5	1#Erwinia_amylovora_Ea02_03	intact
Erwinia_amylovora_EaG5	1#Erwinia_amylovora_Ea3_97	intact
Erwinia_amylovora_EaG5	1#Erwinia_amylovora_Ea4_96	questionable
Erwinia_amylovora_EaG5	1#Erwinia_amylovora_Ea8_96	questionable
Erwinia_amylovora_EaG5	2#Erwinia_amylovora_Ea03_03	intact
Erwinia_amylovora_EaG5	2#Erwinia_amylovora_Ea1_95	intact
Erwinia_amylovora_EaG5	2#Erwinia_amylovora_Ea1_98	questionable
Erwinia_amylovora_EaG5	2#Erwinia_amylovora_Ea2_97	intact
Erwinia_amylovora_EaG5	2#Erwinia_amylovora_Ea3_97	questionable
Erwinia_amylovora_EaG5	2#Erwinia_amylovora_Ea7_96	intact
Erwinia_amylovora_EaG5	3#Erwinia_amylovora_Ea04_03	questionable
Erwinia_amylovora_EaG5	3#Erwinia_amylovora_Ea1_00	questionable
Erwinia_amylovora_EaG5	3#Erwinia_amylovora_Ea1_97	questionable
Erwinia_amylovora_EaG5	3#Erwinia_amylovora_Ea2_97	questionable
Erwinia_amylovora_EaG5	3#Erwinia_amylovora_Ea4_96	intact
Erwinia_amylovora_EaG5	4#Erwinia_amylovora_E2006P	intact
Erwinia_amylovora_EaG5	4#Erwinia_amylovora_Ea6_96	questionable
Erwinia_amylovora_EaG5	4#Erwinia_sp_Ejp617	incomplete
Erwinia_amylovora_EaIF	1#Erwinia_amylovora_Ea01_03	questionable
Erwinia_amylovora_EaIF	1#Erwinia_amylovora_Ea02_03	intact
Erwinia_amylovora_EaIF	1#Erwinia_amylovora_Ea4_96	questionable
Erwinia_amylovora_EaIF	1#Erwinia_amylovora_Ea8_96	questionable
Erwinia_amylovora_EaIF	2#Erwinia_amylovora_Ea03_03	intact
Erwinia_amylovora_EaIF	2#Erwinia_amylovora_Ea1_95	intact
Erwinia_amylovora_EaIF	2#Erwinia_amylovora_Ea1_98	questionable
Erwinia_amylovora_EaIF	2#Erwinia_amylovora_Ea3_97	questionable
Erwinia_amylovora_EaIF	2#Erwinia_amylovora_Ea7_96	intact
Erwinia_amylovora_EaIF	2#Erwinia_sp_OLCASP19	incomplete
Erwinia_amylovora_EaIF	2#Erwinia_sp_OLFS4	incomplete
Erwinia_amylovora_EaIF	2#Erwinia_sp_OLMTSP26	incomplete
Erwinia_amylovora_EaIF	3#Erwinia_amylovora_Ea04_03	questionable
Erwinia_amylovora_EaIF	3#Erwinia_amylovora_Ea1_00	questionable
Erwinia_amylovora_EaIF	3#Erwinia_amylovora_Ea1_97	questionable
Erwinia_amylovora_EaIF	3#Erwinia_amylovora_Ea2_97	questionable
Erwinia_amylovora_EaIF	3#Erwinia_sp_OAMSP11	incomplete
Erwinia_amylovora_EaIF	3#Erwinia_sp_OLMDSP33	incomplete
Erwinia_amylovora_EaIF	3#Erwinia_sp_OLTSP20	incomplete
Erwinia_amylovora_EaIF	4#Erwinia_amylovora_E2006P	intact
Erwinia_amylovora_EaIF	4#Erwinia_amylovora_Ea6_96	questionable
Erwinia_amylovora_EaIF	4#Erwinia_sp_Ejp617	incomplete
Erwinia_amylovora_EaLevo2	1#Erwinia_amylovora_Ea01_03	questionable
Erwinia_amylovora_EaLevo2	1#Erwinia_amylovora_Ea02_03	intact
Erwinia_amylovora_EaLevo2	1#Erwinia_amylovora_Ea3_97	intact
Erwinia_amylovora_EaLevo2	2#Erwinia_amylovora_Ea03_03	intact
Erwinia_amylovora_EaLevo2	2#Erwinia_amylovora_Ea2_97	intact
Erwinia_amylovora_EaLevo2	3#Erwinia_amylovora_Ea1_00	questionable
Erwinia_amylovora_EaLevo2	3#Erwinia_amylovora_Ea4_96	intact
Erwinia_amylovora_EaLevo2	4#Erwinia_amylovora_E2006P	intact
Erwinia_amylovora_FB_20	1#Erwinia_amylovora_Ea01_03	questionable
Erwinia_amylovora_FB_20	1#Erwinia_amylovora_Ea02_03	intact
Erwinia_amylovora_FB_20	1#Erwinia_amylovora_Ea4_96	questionable
Erwinia_amylovora_FB_20	1#Erwinia_amylovora_Ea8_96	questionable
Erwinia_amylovora_FB_20	2#Erwinia_amylovora_Ea03_03	intact
Erwinia_amylovora_FB_20	2#Erwinia_amylovora_Ea1_95	intact
Erwinia_amylovora_FB_20	2#Erwinia_amylovora_Ea1_98	questionable
Erwinia_amylovora_FB_20	2#Erwinia_amylovora_Ea3_97	questionable
Erwinia_amylovora_FB_20	2#Erwinia_amylovora_Ea7_96	intact
Erwinia_amylovora_FB_20	3#Erwinia_amylovora_Ea04_03	questionable
Erwinia_amylovora_FB_20	3#Erwinia_amylovora_Ea1_00	questionable
Erwinia_amylovora_FB_20	3#Erwinia_amylovora_Ea1_97	questionable
Erwinia_amylovora_FB_20	3#Erwinia_amylovora_Ea2_97	questionable
Erwinia_amylovora_FB_20	4#Erwinia_amylovora_E2006P	intact
Erwinia_amylovora_FB_20	4#Erwinia_amylovora_Ea6_96	questionable
Erwinia_amylovora_FB_20	4#Erwinia_sp_Ejp617	incomplete
Erwinia_amylovora_FB_207	1#Erwinia_amylovora_Ea01_03	questionable
Erwinia_amylovora_FB_207	1#Erwinia_amylovora_Ea02_03	intact
Erwinia_amylovora_FB_207	1#Erwinia_amylovora_Ea4_96	questionable
Erwinia_amylovora_FB_207	1#Erwinia_amylovora_Ea8_96	questionable
Erwinia_amylovora_FB_207	2#Erwinia_amylovora_Ea03_03	intact
Erwinia_amylovora_FB_207	2#Erwinia_amylovora_Ea1_95	intact
Erwinia_amylovora_FB_207	2#Erwinia_amylovora_Ea1_98	questionable
Erwinia_amylovora_FB_207	2#Erwinia_amylovora_Ea3_97	questionable
Erwinia_amylovora_FB_207	2#Erwinia_amylovora_Ea7_96	intact
Erwinia_amylovora_FB_207	3#Erwinia_amylovora_Ea04_03	questionable
Erwinia_amylovora_FB_207	3#Erwinia_amylovora_Ea1_00	questionable
Erwinia_amylovora_FB_207	3#Erwinia_amylovora_Ea1_97	questionable
Erwinia_amylovora_FB_207	3#Erwinia_amylovora_Ea2_97	questionable
Erwinia_amylovora_FB_207	4#Erwinia_amylovora_E2006P	intact
Erwinia_amylovora_FB_207	4#Erwinia_amylovora_Ea6_96	questionable
Erwinia_amylovora_FB_207	4#Erwinia_sp_Ejp617	incomplete
Erwinia_amylovora_FB_307	1#Erwinia_amylovora_Ea01_03	questionable
Erwinia_amylovora_FB_307	1#Erwinia_amylovora_Ea02_03	intact
Erwinia_amylovora_FB_307	1#Erwinia_amylovora_Ea4_96	questionable
Erwinia_amylovora_FB_307	1#Erwinia_amylovora_Ea8_96	questionable
Erwinia_amylovora_FB_307	2#Erwinia_amylovora_Ea03_03	intact
Erwinia_amylovora_FB_307	2#Erwinia_amylovora_Ea1_95	intact
Erwinia_amylovora_FB_307	2#Erwinia_amylovora_Ea1_98	questionable
Erwinia_amylovora_FB_307	2#Erwinia_amylovora_Ea3_97	questionable
Erwinia_amylovora_FB_307	2#Erwinia_amylovora_Ea7_96	intact
Erwinia_amylovora_FB_307	3#Erwinia_amylovora_Ea04_03	questionable
Erwinia_amylovora_FB_307	3#Erwinia_amylovora_Ea1_00	questionable
Erwinia_amylovora_FB_307	3#Erwinia_amylovora_Ea1_97	questionable
Erwinia_amylovora_FB_307	3#Erwinia_amylovora_Ea2_97	questionable
Erwinia_amylovora_FB_307	4#Erwinia_amylovora_E2006P	intact
Erwinia_amylovora_FB_307	4#Erwinia_amylovora_Ea6_96	questionable
Erwinia_amylovora_FB_307	4#Erwinia_sp_Ejp617	incomplete
Erwinia_amylovora_FB_86	1#Erwinia_amylovora_Ea01_03	questionable
Erwinia_amylovora_FB_86	1#Erwinia_amylovora_Ea02_03	intact
Erwinia_amylovora_FB_86	1#Erwinia_amylovora_Ea4_96	questionable
Erwinia_amylovora_FB_86	1#Erwinia_amylovora_Ea8_96	questionable
Erwinia_amylovora_FB_86	2#Erwinia_amylovora_Ea03_03	intact
Erwinia_amylovora_FB_86	2#Erwinia_amylovora_Ea1_95	intact
Erwinia_amylovora_FB_86	2#Erwinia_amylovora_Ea1_98	questionable
Erwinia_amylovora_FB_86	2#Erwinia_amylovora_Ea3_97	questionable
Erwinia_amylovora_FB_86	2#Erwinia_amylovora_Ea7_96	intact
Erwinia_amylovora_FB_86	3#Erwinia_amylovora_Ea04_03	questionable
Erwinia_amylovora_FB_86	3#Erwinia_amylovora_Ea1_00	questionable
Erwinia_amylovora_FB_86	3#Erwinia_amylovora_Ea1_97	questionable
Erwinia_amylovora_FB_86	3#Erwinia_amylovora_Ea2_97	questionable
Erwinia_amylovora_FB_86	4#Erwinia_amylovora_E2006P	intact
Erwinia_amylovora_FB_86	4#Erwinia_amylovora_Ea6_96	questionable
Erwinia_amylovora_FB_86	4#Erwinia_sp_Ejp617	incomplete
Erwinia_amylovora_Fb_97b	1#Erwinia_amylovora_Ea01_03	questionable
Erwinia_amylovora_Fb_97b	1#Erwinia_amylovora_Ea02_03	intact
Erwinia_amylovora_Fb_97b	1#Erwinia_amylovora_Ea4_96	questionable
Erwinia_amylovora_Fb_97b	1#Erwinia_amylovora_Ea8_96	questionable
Erwinia_amylovora_Fb_97b	2#Erwinia_amylovora_Ea03_03	intact
Erwinia_amylovora_Fb_97b	2#Erwinia_amylovora_Ea1_95	intact
Erwinia_amylovora_Fb_97b	2#Erwinia_amylovora_Ea1_98	questionable
Erwinia_amylovora_Fb_97b	2#Erwinia_amylovora_Ea3_97	questionable
Erwinia_amylovora_Fb_97b	2#Erwinia_amylovora_Ea7_96	intact
Erwinia_amylovora_Fb_97b	3#Erwinia_amylovora_Ea04_03	questionable
Erwinia_amylovora_Fb_97b	3#Erwinia_amylovora_Ea1_00	questionable
Erwinia_amylovora_Fb_97b	3#Erwinia_amylovora_Ea1_97	questionable
Erwinia_amylovora_Fb_97b	3#Erwinia_amylovora_Ea2_97	questionable
Erwinia_amylovora_Fb_97b	4#Erwinia_amylovora_E2006P	intact
Erwinia_amylovora_Fb_97b	4#Erwinia_amylovora_Ea6_96	questionable
Erwinia_amylovora_Fb_97b	4#Erwinia_sp_Ejp617	incomplete
Erwinia_amylovora_HKN06P1	1#Erwinia_amylovora_Ea01_03	questionable
Erwinia_amylovora_HKN06P1	1#Erwinia_amylovora_Ea02_03	intact
Erwinia_amylovora_HKN06P1	1#Erwinia_amylovora_Ea4_96	questionable
Erwinia_amylovora_HKN06P1	1#Erwinia_amylovora_Ea8_96	questionable
Erwinia_amylovora_HKN06P1	2#Erwinia_amylovora_Ea03_03	intact
Erwinia_amylovora_HKN06P1	2#Erwinia_amylovora_Ea1_95	intact
Erwinia_amylovora_HKN06P1	2#Erwinia_amylovora_Ea1_98	questionable
Erwinia_amylovora_HKN06P1	2#Erwinia_amylovora_Ea3_97	questionable
Erwinia_amylovora_HKN06P1	2#Erwinia_amylovora_Ea7_96	intact
Erwinia_amylovora_HKN06P1	3#Erwinia_amylovora_Ea04_03	questionable
Erwinia_amylovora_HKN06P1	3#Erwinia_amylovora_Ea1_00	questionable
Erwinia_amylovora_HKN06P1	3#Erwinia_amylovora_Ea1_97	questionable
Erwinia_amylovora_HKN06P1	3#Erwinia_amylovora_Ea2_97	questionable
Erwinia_amylovora_HKN06P1	4#Erwinia_amylovora_E2006P	intact
Erwinia_amylovora_HKN06P1	4#Erwinia_amylovora_Ea6_96	questionable
Erwinia_amylovora_HKN06P1	4#Erwinia_sp_Ejp617	incomplete
Erwinia_amylovora_IH_3_1	1#Erwinia_amylovora_Ea01_03	questionable
Erwinia_amylovora_IH_3_1	1#Erwinia_amylovora_Ea02_03	intact
Erwinia_amylovora_IH_3_1	1#Erwinia_amylovora_Ea4_96	questionable
Erwinia_amylovora_IH_3_1	1#Erwinia_amylovora_Ea8_96	questionable
Erwinia_amylovora_IH_3_1	2#Erwinia_amylovora_Ea03_03	intact
Erwinia_amylovora_IH_3_1	2#Erwinia_amylovora_Ea1_95	intact
Erwinia_amylovora_IH_3_1	2#Erwinia_amylovora_Ea1_98	questionable
Erwinia_amylovora_IH_3_1	2#Erwinia_amylovora_Ea3_97	questionable
Erwinia_amylovora_IH_3_1	2#Erwinia_amylovora_Ea7_96	intact
Erwinia_amylovora_IH_3_1	2#Erwinia_sp_OLCASP19	incomplete
Erwinia_amylovora_IH_3_1	2#Erwinia_sp_OLFS4	incomplete
Erwinia_amylovora_IH_3_1	2#Erwinia_sp_OLMTSP26	incomplete
Erwinia_amylovora_IH_3_1	3#Erwinia_amylovora_Ea04_03	questionable
Erwinia_amylovora_IH_3_1	3#Erwinia_amylovora_Ea1_00	questionable
Erwinia_amylovora_IH_3_1	3#Erwinia_amylovora_Ea1_97	questionable
Erwinia_amylovora_IH_3_1	3#Erwinia_amylovora_Ea2_97	questionable
Erwinia_amylovora_IH_3_1	3#Erwinia_sp_OAMSP11	incomplete
Erwinia_amylovora_IH_3_1	3#Erwinia_sp_OLMDSP33	incomplete
Erwinia_amylovora_IH_3_1	3#Erwinia_sp_OLTSP20	incomplete
Erwinia_amylovora_IH_3_1	4#Erwinia_amylovora_E2006P	intact
Erwinia_amylovora_IH_3_1	4#Erwinia_amylovora_Ea6_96	questionable
Erwinia_amylovora_IH_3_1	4#Erwinia_sp_Ejp617	incomplete
Erwinia_amylovora_LA092	1#Erwinia_amylovora_Ea01_03	questionable
Erwinia_amylovora_LA092	1#Erwinia_amylovora_Ea02_03	intact
Erwinia_amylovora_LA092	1#Erwinia_amylovora_Ea4_96	questionable
Erwinia_amylovora_LA092	1#Erwinia_amylovora_Ea8_96	questionable
Erwinia_amylovora_LA092	2#Erwinia_amylovora_Ea03_03	intact
Erwinia_amylovora_LA092	2#Erwinia_amylovora_Ea1_95	intact
Erwinia_amylovora_LA092	2#Erwinia_amylovora_Ea1_98	questionable
Erwinia_amylovora_LA092	2#Erwinia_amylovora_Ea3_97	questionable
Erwinia_amylovora_LA092	2#Erwinia_amylovora_Ea7_96	intact
Erwinia_amylovora_LA092	3#Erwinia_amylovora_Ea04_03	questionable
Erwinia_amylovora_LA092	3#Erwinia_amylovora_Ea1_00	questionable
Erwinia_amylovora_LA092	3#Erwinia_amylovora_Ea1_97	questionable
Erwinia_amylovora_LA092	3#Erwinia_amylovora_Ea2_97	questionable
Erwinia_amylovora_LA092	4#Erwinia_amylovora_E2006P	intact
Erwinia_amylovora_LA092	4#Erwinia_amylovora_Ea6_96	questionable
Erwinia_amylovora_LA092	4#Erwinia_sp_Ejp617	incomplete
Erwinia_amylovora_LA472	1#Erwinia_amylovora_Ea01_03	questionable
Erwinia_amylovora_LA472	1#Erwinia_amylovora_Ea02_03	intact
Erwinia_amylovora_LA472	1#Erwinia_amylovora_Ea3_97	intact
Erwinia_amylovora_LA472	1#Erwinia_amylovora_Ea4_96	questionable
Erwinia_amylovora_LA472	1#Erwinia_amylovora_Ea8_96	questionable
Erwinia_amylovora_LA472	2#Erwinia_amylovora_Ea03_03	intact
Erwinia_amylovora_LA472	2#Erwinia_amylovora_Ea1_95	intact
Erwinia_amylovora_LA472	2#Erwinia_amylovora_Ea1_98	questionable
Erwinia_amylovora_LA472	2#Erwinia_amylovora_Ea2_97	intact
Erwinia_amylovora_LA472	2#Erwinia_amylovora_Ea3_97	questionable
Erwinia_amylovora_LA472	2#Erwinia_amylovora_Ea7_96	intact
Erwinia_amylovora_LA472	3#Erwinia_amylovora_Ea04_03	questionable
Erwinia_amylovora_LA472	3#Erwinia_amylovora_Ea1_00	questionable
Erwinia_amylovora_LA472	3#Erwinia_amylovora_Ea1_97	questionable
Erwinia_amylovora_LA472	3#Erwinia_amylovora_Ea2_97	questionable
Erwinia_amylovora_LA472	3#Erwinia_amylovora_Ea4_96	intact
Erwinia_amylovora_LA472	4#Erwinia_amylovora_E2006P	intact
Erwinia_amylovora_LA472	4#Erwinia_amylovora_Ea6_96	questionable
Erwinia_amylovora_LA472	4#Erwinia_sp_Ejp617	incomplete
Erwinia_amylovora_LA635	1#Erwinia_amylovora_Ea01_03	questionable
Erwinia_amylovora_LA635	1#Erwinia_amylovora_Ea02_03	intact
Erwinia_amylovora_LA635	1#Erwinia_amylovora_Ea4_96	questionable
Erwinia_amylovora_LA635	1#Erwinia_amylovora_Ea8_96	questionable
Erwinia_amylovora_LA635	2#Erwinia_amylovora_Ea03_03	intact
Erwinia_amylovora_LA635	2#Erwinia_amylovora_Ea1_95	intact
Erwinia_amylovora_LA635	2#Erwinia_amylovora_Ea1_98	questionable
Erwinia_amylovora_LA635	2#Erwinia_amylovora_Ea3_97	questionable
Erwinia_amylovora_LA635	2#Erwinia_amylovora_Ea7_96	intact
Erwinia_amylovora_LA635	3#Erwinia_amylovora_Ea04_03	questionable
Erwinia_amylovora_LA635	3#Erwinia_amylovora_Ea1_00	questionable
Erwinia_amylovora_LA635	3#Erwinia_amylovora_Ea1_97	questionable
Erwinia_amylovora_LA635	3#Erwinia_amylovora_Ea2_97	questionable
Erwinia_amylovora_LA635	4#Erwinia_amylovora_E2006P	intact
Erwinia_amylovora_LA635	4#Erwinia_amylovora_Ea6_96	questionable
Erwinia_amylovora_LA635	4#Erwinia_sp_Ejp617	incomplete
Erwinia_amylovora_LA636	1#Erwinia_amylovora_Ea01_03	questionable
Erwinia_amylovora_LA636	1#Erwinia_amylovora_Ea02_03	intact
Erwinia_amylovora_LA636	1#Erwinia_amylovora_Ea4_96	questionable
Erwinia_amylovora_LA636	1#Erwinia_amylovora_Ea8_96	questionable
Erwinia_amylovora_LA636	2#Erwinia_amylovora_Ea03_03	intact
Erwinia_amylovora_LA636	2#Erwinia_amylovora_Ea1_95	intact
Erwinia_amylovora_LA636	2#Erwinia_amylovora_Ea1_98	questionable
Erwinia_amylovora_LA636	2#Erwinia_amylovora_Ea3_97	questionable
Erwinia_amylovora_LA636	2#Erwinia_amylovora_Ea7_96	intact
Erwinia_amylovora_LA636	3#Erwinia_amylovora_Ea04_03	questionable
Erwinia_amylovora_LA636	3#Erwinia_amylovora_Ea1_00	questionable
Erwinia_amylovora_LA636	3#Erwinia_amylovora_Ea1_97	questionable
Erwinia_amylovora_LA636	3#Erwinia_amylovora_Ea2_97	questionable
Erwinia_amylovora_LA636	4#Erwinia_amylovora_E2006P	intact
Erwinia_amylovora_LA636	4#Erwinia_amylovora_Ea6_96	questionable
Erwinia_amylovora_LA636	4#Erwinia_sp_Ejp617	incomplete
Erwinia_amylovora_LA637	1#Erwinia_amylovora_Ea01_03	questionable
Erwinia_amylovora_LA637	1#Erwinia_amylovora_Ea02_03	intact
Erwinia_amylovora_LA637	1#Erwinia_amylovora_Ea4_96	questionable
Erwinia_amylovora_LA637	1#Erwinia_amylovora_Ea8_96	questionable
Erwinia_amylovora_LA637	2#Erwinia_amylovora_Ea03_03	intact
Erwinia_amylovora_LA637	2#Erwinia_amylovora_Ea1_95	intact
Erwinia_amylovora_LA637	2#Erwinia_amylovora_Ea1_98	questionable
Erwinia_amylovora_LA637	2#Erwinia_amylovora_Ea3_97	questionable
Erwinia_amylovora_LA637	2#Erwinia_amylovora_Ea7_96	intact
Erwinia_amylovora_LA637	3#Erwinia_amylovora_Ea04_03	questionable
Erwinia_amylovora_LA637	3#Erwinia_amylovora_Ea1_00	questionable
Erwinia_amylovora_LA637	3#Erwinia_amylovora_Ea1_97	questionable
Erwinia_amylovora_LA637	3#Erwinia_amylovora_Ea2_97	questionable
Erwinia_amylovora_LA637	4#Erwinia_amylovora_E2006P	intact
Erwinia_amylovora_LA637	4#Erwinia_amylovora_Ea6_96	questionable
Erwinia_amylovora_LA637	4#Erwinia_sp_Ejp617	incomplete
Erwinia_amylovora_MAGFLF_2	1#Erwinia_amylovora_Ea01_03	questionable
Erwinia_amylovora_MAGFLF_2	1#Erwinia_amylovora_Ea02_03	intact
Erwinia_amylovora_MAGFLF_2	1#Erwinia_amylovora_Ea4_96	questionable
Erwinia_amylovora_MAGFLF_2	1#Erwinia_amylovora_Ea8_96	questionable
Erwinia_amylovora_MAGFLF_2	2#Erwinia_amylovora_Ea03_03	intact
Erwinia_amylovora_MAGFLF_2	2#Erwinia_amylovora_Ea1_95	intact
Erwinia_amylovora_MAGFLF_2	2#Erwinia_amylovora_Ea1_98	questionable
Erwinia_amylovora_MAGFLF_2	2#Erwinia_amylovora_Ea3_97	questionable
Erwinia_amylovora_MAGFLF_2	2#Erwinia_amylovora_Ea7_96	intact
Erwinia_amylovora_MAGFLF_2	3#Erwinia_amylovora_Ea04_03	questionable
Erwinia_amylovora_MAGFLF_2	3#Erwinia_amylovora_Ea1_00	questionable
Erwinia_amylovora_MAGFLF_2	3#Erwinia_amylovora_Ea1_97	questionable
Erwinia_amylovora_MAGFLF_2	3#Erwinia_amylovora_Ea2_97	questionable
Erwinia_amylovora_MAGFLF_2	4#Erwinia_amylovora_E2006P	intact
Erwinia_amylovora_MAGFLF_2	4#Erwinia_amylovora_Ea6_96	questionable
Erwinia_amylovora_MAGFLF_2	4#Erwinia_sp_Ejp617	incomplete
Erwinia_amylovora_MANB02_1	1#Erwinia_amylovora_Ea01_03	questionable
Erwinia_amylovora_MANB02_1	1#Erwinia_amylovora_Ea02_03	intact
Erwinia_amylovora_MANB02_1	1#Erwinia_amylovora_Ea3_97	intact
Erwinia_amylovora_MANB02_1	1#Erwinia_amylovora_Ea4_96	questionable
Erwinia_amylovora_MANB02_1	1#Erwinia_amylovora_Ea8_96	questionable
Erwinia_amylovora_MANB02_1	2#Erwinia_amylovora_Ea03_03	intact
Erwinia_amylovora_MANB02_1	2#Erwinia_amylovora_Ea1_95	intact
Erwinia_amylovora_MANB02_1	2#Erwinia_amylovora_Ea1_98	questionable
Erwinia_amylovora_MANB02_1	2#Erwinia_amylovora_Ea2_97	intact
Erwinia_amylovora_MANB02_1	2#Erwinia_amylovora_Ea3_97	questionable
Erwinia_amylovora_MANB02_1	2#Erwinia_amylovora_Ea7_96	intact
Erwinia_amylovora_MANB02_1	3#Erwinia_amylovora_Ea04_03	questionable
Erwinia_amylovora_MANB02_1	3#Erwinia_amylovora_Ea1_00	questionable
Erwinia_amylovora_MANB02_1	3#Erwinia_amylovora_Ea1_97	questionable
Erwinia_amylovora_MANB02_1	3#Erwinia_amylovora_Ea2_97	questionable
Erwinia_amylovora_MANB02_1	3#Erwinia_amylovora_Ea4_96	intact
Erwinia_amylovora_MANB02_1	4#Erwinia_amylovora_E2006P	intact
Erwinia_amylovora_MANB02_1	4#Erwinia_amylovora_Ea6_96	questionable
Erwinia_amylovora_MANB02_1	4#Erwinia_sp_Ejp617	incomplete
Erwinia_amylovora_MASHBO	1#Erwinia_amylovora_Ea01_03	questionable
Erwinia_amylovora_MASHBO	1#Erwinia_amylovora_Ea02_03	intact
Erwinia_amylovora_MASHBO	1#Erwinia_amylovora_Ea4_96	questionable
Erwinia_amylovora_MASHBO	1#Erwinia_amylovora_Ea8_96	questionable
Erwinia_amylovora_MASHBO	2#Erwinia_amylovora_Ea03_03	intact
Erwinia_amylovora_MASHBO	2#Erwinia_amylovora_Ea1_95	intact
Erwinia_amylovora_MASHBO	2#Erwinia_amylovora_Ea1_98	questionable
Erwinia_amylovora_MASHBO	2#Erwinia_amylovora_Ea3_97	questionable
Erwinia_amylovora_MASHBO	2#Erwinia_amylovora_Ea7_96	intact
Erwinia_amylovora_MASHBO	3#Erwinia_amylovora_Ea04_03	questionable
Erwinia_amylovora_MASHBO	3#Erwinia_amylovora_Ea1_00	questionable
Erwinia_amylovora_MASHBO	3#Erwinia_amylovora_Ea1_97	questionable
Erwinia_amylovora_MASHBO	3#Erwinia_amylovora_Ea2_97	questionable
Erwinia_amylovora_MASHBO	4#Erwinia_amylovora_E2006P	intact
Erwinia_amylovora_MASHBO	4#Erwinia_amylovora_Ea6_96	questionable
Erwinia_amylovora_MASHBO	4#Erwinia_sp_Ejp617	incomplete
Erwinia_amylovora_MLI181_18	1#Erwinia_amylovora_Ea01_03	questionable
Erwinia_amylovora_MLI181_18	1#Erwinia_amylovora_Ea02_03	intact
Erwinia_amylovora_MLI181_18	1#Erwinia_amylovora_Ea3_97	intact
Erwinia_amylovora_MLI181_18	1#Erwinia_amylovora_Ea4_96	questionable
Erwinia_amylovora_MLI181_18	1#Erwinia_amylovora_Ea8_96	questionable
Erwinia_amylovora_MLI181_18	2#Erwinia_amylovora_Ea03_03	intact
Erwinia_amylovora_MLI181_18	2#Erwinia_amylovora_Ea1_95	intact
Erwinia_amylovora_MLI181_18	2#Erwinia_amylovora_Ea1_98	questionable
Erwinia_amylovora_MLI181_18	2#Erwinia_amylovora_Ea2_97	intact
Erwinia_amylovora_MLI181_18	2#Erwinia_amylovora_Ea3_97	questionable
Erwinia_amylovora_MLI181_18	2#Erwinia_amylovora_Ea7_96	intact
Erwinia_amylovora_MLI181_18	3#Erwinia_amylovora_Ea04_03	questionable
Erwinia_amylovora_MLI181_18	3#Erwinia_amylovora_Ea1_00	questionable
Erwinia_amylovora_MLI181_18	3#Erwinia_amylovora_Ea1_97	questionable
Erwinia_amylovora_MLI181_18	3#Erwinia_amylovora_Ea2_97	questionable
Erwinia_amylovora_MLI181_18	3#Erwinia_amylovora_Ea4_96	intact
Erwinia_amylovora_MLI181_18	4#Erwinia_amylovora_E2006P	intact
Erwinia_amylovora_MLI181_18	4#Erwinia_amylovora_Ea6_96	questionable
Erwinia_amylovora_MLI181_18	4#Erwinia_sp_Ejp617	incomplete
Erwinia_amylovora_MLI200_18	1#Erwinia_amylovora_Ea01_03	questionable
Erwinia_amylovora_MLI200_18	1#Erwinia_amylovora_Ea02_03	intact
Erwinia_amylovora_MLI200_18	1#Erwinia_amylovora_Ea3_97	intact
Erwinia_amylovora_MLI200_18	1#Erwinia_amylovora_Ea4_96	questionable
Erwinia_amylovora_MLI200_18	1#Erwinia_amylovora_Ea8_96	questionable
Erwinia_amylovora_MLI200_18	2#Erwinia_amylovora_Ea03_03	intact
Erwinia_amylovora_MLI200_18	2#Erwinia_amylovora_Ea1_95	intact
Erwinia_amylovora_MLI200_18	2#Erwinia_amylovora_Ea1_98	questionable
Erwinia_amylovora_MLI200_18	2#Erwinia_amylovora_Ea2_97	intact
Erwinia_amylovora_MLI200_18	2#Erwinia_amylovora_Ea3_97	questionable
Erwinia_amylovora_MLI200_18	2#Erwinia_amylovora_Ea7_96	intact
Erwinia_amylovora_MLI200_18	3#Erwinia_amylovora_Ea04_03	questionable
Erwinia_amylovora_MLI200_18	3#Erwinia_amylovora_Ea1_00	questionable
Erwinia_amylovora_MLI200_18	3#Erwinia_amylovora_Ea1_97	questionable
Erwinia_amylovora_MLI200_18	3#Erwinia_amylovora_Ea2_97	questionable
Erwinia_amylovora_MLI200_18	3#Erwinia_amylovora_Ea4_96	intact
Erwinia_amylovora_MLI200_18	4#Erwinia_amylovora_E2006P	intact
Erwinia_amylovora_MLI200_18	4#Erwinia_amylovora_Ea6_96	questionable
Erwinia_amylovora_MLI200_18	4#Erwinia_sp_Ejp617	incomplete
Erwinia_amylovora_MLI217_18	1#Erwinia_amylovora_Ea01_03	questionable
Erwinia_amylovora_MLI217_18	1#Erwinia_amylovora_Ea02_03	intact
Erwinia_amylovora_MLI217_18	1#Erwinia_amylovora_Ea4_96	questionable
Erwinia_amylovora_MLI217_18	1#Erwinia_amylovora_Ea8_96	questionable
Erwinia_amylovora_MLI217_18	2#Erwinia_amylovora_Ea03_03	intact
Erwinia_amylovora_MLI217_18	2#Erwinia_amylovora_Ea1_95	intact
Erwinia_amylovora_MLI217_18	2#Erwinia_amylovora_Ea1_98	questionable
Erwinia_amylovora_MLI217_18	2#Erwinia_amylovora_Ea3_97	questionable
Erwinia_amylovora_MLI217_18	2#Erwinia_amylovora_Ea7_96	intact
Erwinia_amylovora_MLI217_18	3#Erwinia_amylovora_Ea04_03	questionable
Erwinia_amylovora_MLI217_18	3#Erwinia_amylovora_Ea1_00	questionable
Erwinia_amylovora_MLI217_18	3#Erwinia_amylovora_Ea1_97	questionable
Erwinia_amylovora_MLI217_18	3#Erwinia_amylovora_Ea2_97	questionable
Erwinia_amylovora_MLI217_18	4#Erwinia_amylovora_E2006P	intact
Erwinia_amylovora_MLI217_18	4#Erwinia_amylovora_Ea6_96	questionable
Erwinia_amylovora_MLI217_18	4#Erwinia_sp_Ejp617	incomplete
Erwinia_amylovora_MLI90_17	1#Erwinia_amylovora_Ea01_03	questionable
Erwinia_amylovora_MLI90_17	1#Erwinia_amylovora_Ea02_03	intact
Erwinia_amylovora_MLI90_17	1#Erwinia_amylovora_Ea4_96	questionable
Erwinia_amylovora_MLI90_17	1#Erwinia_amylovora_Ea8_96	questionable
Erwinia_amylovora_MLI90_17	2#Erwinia_amylovora_Ea03_03	intact
Erwinia_amylovora_MLI90_17	2#Erwinia_amylovora_Ea1_95	intact
Erwinia_amylovora_MLI90_17	2#Erwinia_amylovora_Ea1_98	questionable
Erwinia_amylovora_MLI90_17	2#Erwinia_amylovora_Ea3_97	questionable
Erwinia_amylovora_MLI90_17	2#Erwinia_amylovora_Ea7_96	intact
Erwinia_amylovora_MLI90_17	3#Erwinia_amylovora_Ea04_03	questionable
Erwinia_amylovora_MLI90_17	3#Erwinia_amylovora_Ea1_00	questionable
Erwinia_amylovora_MLI90_17	3#Erwinia_amylovora_Ea1_97	questionable
Erwinia_amylovora_MLI90_17	3#Erwinia_amylovora_Ea2_97	questionable
Erwinia_amylovora_MLI90_17	4#Erwinia_amylovora_E2006P	intact
Erwinia_amylovora_MLI90_17	4#Erwinia_amylovora_Ea6_96	questionable
Erwinia_amylovora_MLI90_17	4#Erwinia_sp_Ejp617	incomplete
Erwinia_amylovora_NHSB01_1	1#Erwinia_amylovora_Ea01_03	questionable
Erwinia_amylovora_NHSB01_1	1#Erwinia_amylovora_Ea02_03	intact
Erwinia_amylovora_NHSB01_1	1#Erwinia_amylovora_Ea4_96	questionable
Erwinia_amylovora_NHSB01_1	1#Erwinia_amylovora_Ea8_96	questionable
Erwinia_amylovora_NHSB01_1	2#Erwinia_amylovora_Ea03_03	intact
Erwinia_amylovora_NHSB01_1	2#Erwinia_amylovora_Ea1_95	intact
Erwinia_amylovora_NHSB01_1	2#Erwinia_amylovora_Ea1_98	questionable
Erwinia_amylovora_NHSB01_1	2#Erwinia_amylovora_Ea3_97	questionable
Erwinia_amylovora_NHSB01_1	2#Erwinia_amylovora_Ea7_96	intact
Erwinia_amylovora_NHSB01_1	3#Erwinia_amylovora_Ea04_03	questionable
Erwinia_amylovora_NHSB01_1	3#Erwinia_amylovora_Ea1_00	questionable
Erwinia_amylovora_NHSB01_1	3#Erwinia_amylovora_Ea1_97	questionable
Erwinia_amylovora_NHSB01_1	3#Erwinia_amylovora_Ea2_97	questionable
Erwinia_amylovora_NHSB01_1	4#Erwinia_amylovora_E2006P	intact
Erwinia_amylovora_NHSB01_1	4#Erwinia_amylovora_Ea6_96	questionable
Erwinia_amylovora_NHSB01_1	4#Erwinia_sp_Ejp617	incomplete
Erwinia_amylovora_NHWL02_2	1#Erwinia_amylovora_Ea01_03	questionable
Erwinia_amylovora_NHWL02_2	1#Erwinia_amylovora_Ea02_03	intact
Erwinia_amylovora_NHWL02_2	1#Erwinia_amylovora_Ea3_97	intact
Erwinia_amylovora_NHWL02_2	1#Erwinia_amylovora_Ea4_96	questionable
Erwinia_amylovora_NHWL02_2	1#Erwinia_amylovora_Ea8_96	questionable
Erwinia_amylovora_NHWL02_2	2#Erwinia_amylovora_Ea03_03	intact
Erwinia_amylovora_NHWL02_2	2#Erwinia_amylovora_Ea1_95	intact
Erwinia_amylovora_NHWL02_2	2#Erwinia_amylovora_Ea1_98	questionable
Erwinia_amylovora_NHWL02_2	2#Erwinia_amylovora_Ea2_97	intact
Erwinia_amylovora_NHWL02_2	2#Erwinia_amylovora_Ea3_97	questionable
Erwinia_amylovora_NHWL02_2	2#Erwinia_amylovora_Ea7_96	intact
Erwinia_amylovora_NHWL02_2	3#Erwinia_amylovora_Ea04_03	questionable
Erwinia_amylovora_NHWL02_2	3#Erwinia_amylovora_Ea1_00	questionable
Erwinia_amylovora_NHWL02_2	3#Erwinia_amylovora_Ea1_97	questionable
Erwinia_amylovora_NHWL02_2	3#Erwinia_amylovora_Ea2_97	questionable
Erwinia_amylovora_NHWL02_2	3#Erwinia_amylovora_Ea4_96	intact
Erwinia_amylovora_NHWL02_2	4#Erwinia_amylovora_E2006P	intact
Erwinia_amylovora_NHWL02_2	4#Erwinia_amylovora_Ea6_96	questionable
Erwinia_amylovora_NHWL02_2	4#Erwinia_sp_Ejp617	incomplete
Erwinia_amylovora_O_RG_21	1#Erwinia_amylovora_Ea01_03	questionable
Erwinia_amylovora_O_RG_21	1#Erwinia_amylovora_Ea02_03	intact
Erwinia_amylovora_O_RG_21	1#Erwinia_amylovora_Ea4_96	questionable
Erwinia_amylovora_O_RG_21	1#Erwinia_amylovora_Ea8_96	questionable
Erwinia_amylovora_O_RG_21	2#Erwinia_amylovora_Ea03_03	intact
Erwinia_amylovora_O_RG_21	2#Erwinia_amylovora_Ea1_95	intact
Erwinia_amylovora_O_RG_21	2#Erwinia_amylovora_Ea1_98	questionable
Erwinia_amylovora_O_RG_21	2#Erwinia_amylovora_Ea3_97	questionable
Erwinia_amylovora_O_RG_21	2#Erwinia_amylovora_Ea7_96	intact
Erwinia_amylovora_O_RG_21	3#Erwinia_amylovora_Ea04_03	questionable
Erwinia_amylovora_O_RG_21	3#Erwinia_amylovora_Ea1_00	questionable
Erwinia_amylovora_O_RG_21	3#Erwinia_amylovora_Ea1_97	questionable
Erwinia_amylovora_O_RG_21	3#Erwinia_amylovora_Ea2_97	questionable
Erwinia_amylovora_O_RG_21	4#Erwinia_amylovora_E2006P	intact
Erwinia_amylovora_O_RG_21	4#Erwinia_amylovora_Ea6_96	questionable
Erwinia_amylovora_O_RG_21	4#Erwinia_sp_Ejp617	incomplete
Erwinia_amylovora_OR1	1#Erwinia_amylovora_Ea01_03	questionable
Erwinia_amylovora_OR1	1#Erwinia_amylovora_Ea02_03	intact
Erwinia_amylovora_OR1	1#Erwinia_amylovora_Ea3_97	intact
Erwinia_amylovora_OR1	1#Erwinia_amylovora_Ea4_96	questionable
Erwinia_amylovora_OR1	1#Erwinia_amylovora_Ea8_96	questionable
Erwinia_amylovora_OR1	2#Erwinia_amylovora_Ea03_03	intact
Erwinia_amylovora_OR1	2#Erwinia_amylovora_Ea1_95	intact
Erwinia_amylovora_OR1	2#Erwinia_amylovora_Ea1_98	questionable
Erwinia_amylovora_OR1	2#Erwinia_amylovora_Ea2_97	intact
Erwinia_amylovora_OR1	2#Erwinia_amylovora_Ea3_97	questionable
Erwinia_amylovora_OR1	2#Erwinia_amylovora_Ea7_96	intact
Erwinia_amylovora_OR1	3#Erwinia_amylovora_Ea04_03	questionable
Erwinia_amylovora_OR1	3#Erwinia_amylovora_Ea1_00	questionable
Erwinia_amylovora_OR1	3#Erwinia_amylovora_Ea1_97	questionable
Erwinia_amylovora_OR1	3#Erwinia_amylovora_Ea2_97	questionable
Erwinia_amylovora_OR1	3#Erwinia_amylovora_Ea4_96	intact
Erwinia_amylovora_OR1	4#Erwinia_amylovora_E2006P	intact
Erwinia_amylovora_OR1	4#Erwinia_amylovora_Ea6_96	questionable
Erwinia_amylovora_OR1	4#Erwinia_sp_Ejp617	incomplete
Erwinia_amylovora_OR6	1#Erwinia_amylovora_Ea01_03	questionable
Erwinia_amylovora_OR6	1#Erwinia_amylovora_Ea02_03	intact
Erwinia_amylovora_OR6	1#Erwinia_amylovora_Ea3_97	intact
Erwinia_amylovora_OR6	1#Erwinia_amylovora_Ea4_96	questionable
Erwinia_amylovora_OR6	1#Erwinia_amylovora_Ea8_96	questionable
Erwinia_amylovora_OR6	2#Erwinia_amylovora_Ea03_03	intact
Erwinia_amylovora_OR6	2#Erwinia_amylovora_Ea1_95	intact
Erwinia_amylovora_OR6	2#Erwinia_amylovora_Ea1_98	questionable
Erwinia_amylovora_OR6	2#Erwinia_amylovora_Ea2_97	intact
Erwinia_amylovora_OR6	2#Erwinia_amylovora_Ea3_97	questionable
Erwinia_amylovora_OR6	2#Erwinia_amylovora_Ea7_96	intact
Erwinia_amylovora_OR6	3#Erwinia_amylovora_Ea04_03	questionable
Erwinia_amylovora_OR6	3#Erwinia_amylovora_Ea1_00	questionable
Erwinia_amylovora_OR6	3#Erwinia_amylovora_Ea1_97	questionable
Erwinia_amylovora_OR6	3#Erwinia_amylovora_Ea2_97	questionable
Erwinia_amylovora_OR6	3#Erwinia_amylovora_Ea4_96	intact
Erwinia_amylovora_OR6	4#Erwinia_amylovora_E2006P	intact
Erwinia_amylovora_OR6	4#Erwinia_amylovora_Ea6_96	questionable
Erwinia_amylovora_OR6	4#Erwinia_sp_Ejp617	incomplete
Erwinia_amylovora_P_C_3b	1#Erwinia_amylovora_Ea01_03	questionable
Erwinia_amylovora_P_C_3b	1#Erwinia_amylovora_Ea02_03	intact
Erwinia_amylovora_P_C_3b	1#Erwinia_amylovora_Ea4_96	questionable
Erwinia_amylovora_P_C_3b	1#Erwinia_amylovora_Ea8_96	questionable
Erwinia_amylovora_P_C_3b	2#Erwinia_amylovora_Ea03_03	intact
Erwinia_amylovora_P_C_3b	2#Erwinia_amylovora_Ea1_95	intact
Erwinia_amylovora_P_C_3b	2#Erwinia_amylovora_Ea1_98	questionable
Erwinia_amylovora_P_C_3b	2#Erwinia_amylovora_Ea3_97	questionable
Erwinia_amylovora_P_C_3b	2#Erwinia_amylovora_Ea7_96	intact
Erwinia_amylovora_P_C_3b	3#Erwinia_amylovora_Ea04_03	questionable
Erwinia_amylovora_P_C_3b	3#Erwinia_amylovora_Ea1_00	questionable
Erwinia_amylovora_P_C_3b	3#Erwinia_amylovora_Ea1_97	questionable
Erwinia_amylovora_P_C_3b	3#Erwinia_amylovora_Ea2_97	questionable
Erwinia_amylovora_P_C_3b	4#Erwinia_amylovora_E2006P	intact
Erwinia_amylovora_P_C_3b	4#Erwinia_amylovora_Ea6_96	questionable
Erwinia_amylovora_P_C_3b	4#Erwinia_sp_Ejp617	incomplete
Erwinia_amylovora_RISTBO01_2	1#Erwinia_amylovora_Ea01_03	questionable
Erwinia_amylovora_RISTBO01_2	1#Erwinia_amylovora_Ea02_03	intact
Erwinia_amylovora_RISTBO01_2	1#Erwinia_amylovora_Ea3_97	intact
Erwinia_amylovora_RISTBO01_2	1#Erwinia_amylovora_Ea4_96	questionable
Erwinia_amylovora_RISTBO01_2	1#Erwinia_amylovora_Ea8_96	questionable
Erwinia_amylovora_RISTBO01_2	2#Erwinia_amylovora_Ea03_03	intact
Erwinia_amylovora_RISTBO01_2	2#Erwinia_amylovora_Ea1_95	intact
Erwinia_amylovora_RISTBO01_2	2#Erwinia_amylovora_Ea1_98	questionable
Erwinia_amylovora_RISTBO01_2	2#Erwinia_amylovora_Ea2_97	intact
Erwinia_amylovora_RISTBO01_2	2#Erwinia_amylovora_Ea3_97	questionable
Erwinia_amylovora_RISTBO01_2	2#Erwinia_amylovora_Ea7_96	intact
Erwinia_amylovora_RISTBO01_2	3#Erwinia_amylovora_Ea04_03	questionable
Erwinia_amylovora_RISTBO01_2	3#Erwinia_amylovora_Ea1_00	questionable
Erwinia_amylovora_RISTBO01_2	3#Erwinia_amylovora_Ea1_97	questionable
Erwinia_amylovora_RISTBO01_2	3#Erwinia_amylovora_Ea2_97	questionable
Erwinia_amylovora_RISTBO01_2	3#Erwinia_amylovora_Ea4_96	intact
Erwinia_amylovora_RISTBO01_2	4#Erwinia_amylovora_E2006P	intact
Erwinia_amylovora_RISTBO01_2	4#Erwinia_amylovora_Ea6_96	questionable
Erwinia_amylovora_RISTBO01_2	4#Erwinia_sp_Ejp617	incomplete
Erwinia_amylovora_TS3128	1#Erwinia_amylovora_Ea01_03	questionable
Erwinia_amylovora_TS3128	1#Erwinia_amylovora_Ea02_03	intact
Erwinia_amylovora_TS3128	1#Erwinia_amylovora_Ea4_96	questionable
Erwinia_amylovora_TS3128	1#Erwinia_amylovora_Ea8_96	questionable
Erwinia_amylovora_TS3128	2#Erwinia_amylovora_Ea03_03	intact
Erwinia_amylovora_TS3128	2#Erwinia_amylovora_Ea1_95	intact
Erwinia_amylovora_TS3128	2#Erwinia_amylovora_Ea1_98	questionable
Erwinia_amylovora_TS3128	2#Erwinia_amylovora_Ea3_97	questionable
Erwinia_amylovora_TS3128	2#Erwinia_amylovora_Ea7_96	intact
Erwinia_amylovora_TS3128	3#Erwinia_amylovora_Ea04_03	questionable
Erwinia_amylovora_TS3128	3#Erwinia_amylovora_Ea1_00	questionable
Erwinia_amylovora_TS3128	3#Erwinia_amylovora_Ea1_97	questionable
Erwinia_amylovora_TS3128	3#Erwinia_amylovora_Ea2_97	questionable
Erwinia_amylovora_TS3128	4#Erwinia_amylovora_E2006P	intact
Erwinia_amylovora_TS3128	4#Erwinia_amylovora_Ea6_96	questionable
Erwinia_amylovora_TS3128	4#Erwinia_sp_Ejp617	incomplete
Erwinia_amylovora_TS3238	1#Erwinia_amylovora_Ea01_03	questionable
Erwinia_amylovora_TS3238	1#Erwinia_amylovora_Ea02_03	intact
Erwinia_amylovora_TS3238	1#Erwinia_amylovora_Ea4_96	questionable
[truncated: 199 more rows]
