# Supplementary material for: Genomic Analysis Unveils the Pervasiveness and Diversity of Prophages Infecting Erwinia Species
Source: Pathogens. 2022 Dec 27;12(1):44. doi: 10.3390/pathogens12010044 (PMC9866893; doi:10.3390/pathogens12010044)
Supplement: Supplementary file 1 [file pathogens-12-00044-s001.zip › Table_S9 - brex_systems.xlsx]

## Sheet: suppFileOfSystem1a.proc
Table S9. Putative BREX type 1 defense system detected in Erwinia spp. genome assemblies.
		Genomic position
NCBI assembly ID	Bacteria	brxA	brxB	brxC	pglX	pglZ	brxL
GCA_000027265.1	Erwinia pyrifoliae Ep1 96	3075240..3075842	3075839..3076441	3076453..3080097	3080141..3083812	3084003..3086600	3086611..3088695
GCA_000026985.1	Erwinia pyrifoliae DSM 12163	3075305..3075907	3075904..3076506	3076518..3080162	3080206..3083877	3084068..3086665	3086676..3088760
GCA_002952315.1	Erwinia pyrifoliae EpK1-15	906394..906996	905795..906397	902139..905783	898424..902095	895636..898233	893541..895625
GCA_020428355.1	Erwinia pyrifoliae YKB12328	1814550..1815152	1815149..1815751	1815763..1819407	1819451..1823122	1823313..1825910	1825921..1828005
GCA_000165815.1	Erwinia sp. Ejp617	2142411..2143013	2141812..2142414	2138156..2141800	2134441..2138112	2131653..2134250	2129558..2131642
GCA_020342335.1	Erwinia gerundensis AR	2567982..2568581	2568578..2569192	2569295..2573017	2574965..2576938 2580459..2582210	2582428..2585031	2585118..2587349
