# Supplementary material for: Genomic Analysis Unveils the Pervasiveness and Diversity of Prophages Infecting Erwinia Species
Source: Pathogens. 2022 Dec 27;12(1):44. doi: 10.3390/pathogens12010044 (PMC9866893; doi:10.3390/pathogens12010044)
Supplement: Supplementary file 1 [file pathogens-12-00044-s001.zip › Table_S10 - tabela_genome_info_profagos_erwinia.xlsx]

## Sheet: tabela_genome_info_profagos_erw
Table S10. Genomic information of Erwinia species and prophages detected by PHASTER.
ID assembly	Bacteria	%GC_bacteria	#prophage	prophage completeness	prophage size (kb)	%GC_prophage	ID contig	Prophage coordinates
GCA_000367605.2	Erwinia_amylovora_01SFR_BO	53.57	2	incomplete	8.5	46.09	CAPA010000081_amylovora_01SFR_BO_WGS_project_CAPA00000000_data	640427-648944
GCA_000367605.2	Erwinia_amylovora_01SFR_BO	53.57	1	incomplete	13	45.36	CAPA010000091_amylovora_01SFR_BO_WGS_project_CAPA00000000_data	605085-618145
GCA_020546585.1	Erwinia_amylovora_11_7	53.5	4	incomplete	6.4	53.36	CP0636891_amylovora_strain_11_7_plasmid_p11_7	15320-21818
GCA_020546585.1	Erwinia_amylovora_11_7	53.5	2	incomplete	23.2	53.46	CP0636881_amylovora_strain_11_7_chromosome	526174-549430
GCA_020546585.1	Erwinia_amylovora_11_7	53.5	3	incomplete	8.5	45.98	CP0636881_amylovora_strain_11_7_chromosome	2072750-2081320
GCA_020546585.1	Erwinia_amylovora_11_7	53.5	1	incomplete	15.2	46.02	CP0636881_amylovora_strain_11_7_chromosome	464142-479385
GCA_012368325.1	Erwinia_amylovora_1279	53.52	2	incomplete	20.8	49.58	JAAEXY0100000341_amylovora_strain_1279_Ea_1279_contig_34	2-20850
GCA_012368325.1	Erwinia_amylovora_1279	53.52	1	incomplete	8	46.3	JAAEXY0100000311_amylovora_strain_1279_Ea_1279_contig_31	538-8580
GCA_012368325.1	Erwinia_amylovora_1279	53.52	3	incomplete	17	52.87	JAAEXY0100000341_amylovora_strain_1279_Ea_1279_contig_34	55689-72700
GCA_012368345.1	Erwinia_amylovora_1280	53.51	1	incomplete	15.2	46.03	JAAEXX0100000041_amylovora_strain_1280_Ea_1280_contig_4	19972-35214
GCA_012368345.1	Erwinia_amylovora_1280	53.51	2	incomplete	23.2	53.47	JAAEXX0100000041_amylovora_strain_1280_Ea_1280_contig_4	82004-105260
GCA_020882215.1	Erwinia_amylovora_1_2	53.48	1	incomplete	8.5	46.07	CP0636941_amylovora_strain_1_2_chromosome	971333-979849
GCA_020882215.1	Erwinia_amylovora_1_2	53.48	2	incomplete	13	45.36	CP0636941_amylovora_strain_1_2_chromosome	2574413-2587473
GCA_020882215.1	Erwinia_amylovora_1_2	53.48	3	incomplete	6.4	53.36	CP0636961_amylovora_strain_1_2_plasmid_pEa_IncX	30-6528
GCA_012367905.1	Erwinia_amylovora_1400_1	53.52	3	incomplete	8.5	46.07	JAAEXD0100000081_amylovora_strain_1400_1_Ea_1400_1_contig_8	414147-422663
GCA_012367905.1	Erwinia_amylovora_1400_1	53.52	1	incomplete	23.2	53.48	JAAEXD0100000111_amylovora_strain_1400_1_Ea_1400_1_contig_11	45844-69100
GCA_012367905.1	Erwinia_amylovora_1400_1	53.52	2	incomplete	20.8	49.57	JAAEXD0100000111_amylovora_strain_1400_1_Ea_1400_1_contig_11	102533-123381
GCA_012367945.1	Erwinia_amylovora_1400_2	53.53	1	incomplete	18.2	49.16	JAAEXC0100000111_amylovora_strain_1400_2_Ea_1400_2_contig_11	138082-156332
GCA_012367945.1	Erwinia_amylovora_1400_2	53.53	2	incomplete	11.3	48.01	JAAEXC0100000561_amylovora_strain_1400_2_Ea_1400_2_contig_56	47157-58526
GCA_012368315.1	Erwinia_amylovora_1476	53.52	1	incomplete	8.5	45.98	JAAEXW0100000251_amylovora_strain_1476_Ea_1476_contig_25	51204-59774
GCA_012368315.1	Erwinia_amylovora_1476	53.52	2	incomplete	20.8	49.58	JAAEXW0100000371_amylovora_strain_1476_Ea_1476_contig_37	2-20850
GCA_012368315.1	Erwinia_amylovora_1476	53.52	3	incomplete	17	52.87	JAAEXW0100000371_amylovora_strain_1476_Ea_1476_contig_37	55695-72706
GCA_012367885.1	Erwinia_amylovora_1477_1	53.51	1	incomplete	20.8	49.58	JAAEXB0100000201_amylovora_strain_1477_1_Ea_1477_1_contig_20	3-20851
GCA_012367885.1	Erwinia_amylovora_1477_1	53.51	2	incomplete	23.2	53.48	JAAEXB0100000201_amylovora_strain_1477_1_Ea_1477_1_contig_20	54279-77535
GCA_012367935.1	Erwinia_amylovora_1478_2	53.56	1	incomplete	13	45.36	JAAEXA0100000171_amylovora_strain_1478_2_Ea_1478_2_contig_17	67490-80549
GCA_012367875.1	Erwinia_amylovora_1480_3	53.55	3	incomplete	17	52.85	JAAEWZ0100000391_amylovora_strain_1480_3_Ea_1480_3_contig_39	7551-24561
GCA_012367875.1	Erwinia_amylovora_1480_3	53.55	2	incomplete	8.2	45.35	JAAEWZ0100000301_amylovora_strain_1480_3_Ea_1480_3_contig_30	51002-59259
GCA_012367875.1	Erwinia_amylovora_1480_3	53.55	1	incomplete	15.2	46.03	JAAEWZ0100000021_amylovora_strain_1480_3_Ea_1480_3_contig_2	19429-34671
GCA_012368375.1	Erwinia_amylovora_1482	53.53	1	incomplete	23.2	53.47	JAAEXV0100000071_amylovora_strain_1482_Ea_1482_contig_7	45843-69099
GCA_012368375.1	Erwinia_amylovora_1482	53.53	2	incomplete	13	45.36	JAAEXV0100000071_amylovora_strain_1482_Ea_1482_contig_7	115706-128765
GCA_012368265.1	Erwinia_amylovora_1486	53.52	3	incomplete	23.2	53.47	JAAEXU0100000051_amylovora_strain_1486_Ea_1486_contig_5	34432-57688
GCA_012368265.1	Erwinia_amylovora_1486	53.52	1	incomplete	8.5	46.07	JAAEXU0100000011_amylovora_strain_1486_Ea_1486_contig_1	28652-37168
GCA_012368265.1	Erwinia_amylovora_1486	53.52	2	incomplete	15.2	46.03	JAAEXU0100000251_amylovora_strain_1486_Ea_1486_contig_25	11934-27176
GCA_012368295.1	Erwinia_amylovora_1581	53.52	3	incomplete	13	45.36	JAAEXT0100000061_amylovora_strain_1581_Ea_1581_contig_6	115706-128766
GCA_012368295.1	Erwinia_amylovora_1581	53.52	1	incomplete	8.5	45.98	JAAEXT0100000131_amylovora_strain_1581_Ea_1581_contig_13	123782-132352
GCA_012368295.1	Erwinia_amylovora_1581	53.52	2	incomplete	23.2	53.47	JAAEXT0100000061_amylovora_strain_1581_Ea_1581_contig_6	45843-69099
GCA_012368255.1	Erwinia_amylovora_1598	53.52	2	incomplete	13	45.36	JAAEXS0100000181_amylovora_strain_1598_Ea_1598_contig_18	116274-129334
GCA_012368255.1	Erwinia_amylovora_1598	53.52	1	incomplete	23.2	53.47	JAAEXS0100000181_amylovora_strain_1598_Ea_1598_contig_18	46411-69667
GCA_012368165.1	Erwinia_amylovora_1602	53.53	1	incomplete	15.2	46.02	JAAEXR0100000211_amylovora_strain_1602_Ea_1602_contig_21	19943-35186
GCA_012368165.1	Erwinia_amylovora_1602	53.53	2	incomplete	23.2	53.47	JAAEXR0100000211_amylovora_strain_1602_Ea_1602_contig_21	81976-105232
GCA_012368205.1	Erwinia_amylovora_1609	53.53	1	incomplete	15.2	46.03	JAAEXQ0100000231_amylovora_strain_1609_Ea_1609_contig_23	19943-35185
GCA_012368205.1	Erwinia_amylovora_1609	53.53	2	incomplete	23.2	53.47	JAAEXQ0100000231_amylovora_strain_1609_Ea_1609_contig_23	81975-105231
GCA_012367815.1	Erwinia_amylovora_1611_BCEa29	53.52	1	incomplete	13	45.36	JAAEWY0100000071_amylovora_strain_1611_BCEa29_Ea_BC_29_contig_7	57485-70544
GCA_012368185.1	Erwinia_amylovora_1612	53.47	1	incomplete	20.8	49.56	JAAEXP0100000031_amylovora_strain_1612_Ea_1612_contig_3	2-20849
GCA_012368185.1	Erwinia_amylovora_1612	53.47	2	incomplete	23.1	53.52	JAAEXP0100000031_amylovora_strain_1612_Ea_1612_contig_3	54277-77420
GCA_012368155.1	Erwinia_amylovora_1617	53.52	1	incomplete	13	45.36	JAAEXO0100000151_amylovora_strain_1617_Ea_1617_contig_15	67495-80554
GCA_012368175.1	Erwinia_amylovora_1619	53.6	2	incomplete	13	45.36	JAAEXN0100000151_amylovora_strain_1619_Ea_1619_contig_15	115706-128766
GCA_012368175.1	Erwinia_amylovora_1619	53.6	3	incomplete	8.5	46.06	JAAEXN0100000181_amylovora_strain_1619_Ea_1619_contig_18	112220-120736
GCA_012368175.1	Erwinia_amylovora_1619	53.6	1	incomplete	23.2	53.47	JAAEXN0100000151_amylovora_strain_1619_Ea_1619_contig_15	45843-69099
GCA_012368135.1	Erwinia_amylovora_1668	53.52	1	incomplete	7.8	45.47	JAAEXM0100000121_amylovora_strain_1668_Ea_1668_contig_12	28971-36868
GCA_012368135.1	Erwinia_amylovora_1668	53.52	2	incomplete	23.2	53.48	JAAEXM0100000271_amylovora_strain_1668_Ea_1668_contig_27	45844-69100
GCA_012368135.1	Erwinia_amylovora_1668	53.52	3	incomplete	20.8	49.57	JAAEXM0100000271_amylovora_strain_1668_Ea_1668_contig_27	102528-123376
GCA_012368085.1	Erwinia_amylovora_1680	53.52	2	incomplete	23.2	53.48	JAAEXL0100000311_amylovora_strain_1680_Ea_1680_contig_31	54278-77534
GCA_012368085.1	Erwinia_amylovora_1680	53.52	1	incomplete	20.8	49.58	JAAEXL0100000311_amylovora_strain_1680_Ea_1680_contig_31	2-20850
GCA_012368055.1	Erwinia_amylovora_1686	53.52	3	incomplete	17	52.87	JAAEXK0100000081_amylovora_strain_1686_Ea_1686_contig_8	56339-73349
GCA_012368055.1	Erwinia_amylovora_1686	53.52	2	incomplete	17.9	50.11	JAAEXK0100000081_amylovora_strain_1686_Ea_1686_contig_8	53-17999
GCA_012368055.1	Erwinia_amylovora_1686	53.52	1	incomplete	8.3	45.85	JAAEXK0100000201_amylovora_strain_1686_Ea_1686_contig_20	112770-121113
GCA_017161545.1	Erwinia_amylovora_17_2187	53.58	1	incomplete	8.5	46.07	CP0667941_amylovora_strain_17_2187_chromosome	1897368-1905884
GCA_017161545.1	Erwinia_amylovora_17_2187	53.58	2	incomplete	13	45.37	CP0667941_amylovora_strain_17_2187_chromosome	3420641-3433701
GCA_012368035.1	Erwinia_amylovora_20060013	53.52	2	incomplete	23.2	53.47	JAAEXH0100000271_amylovora_strain_20060013_Ea_20060013_contig_27	81976-105232
GCA_012368035.1	Erwinia_amylovora_20060013	53.52	1	incomplete	15.2	46.03	JAAEXH0100000271_amylovora_strain_20060013_Ea_20060013_contig_27	19943-35186
GCA_012368015.1	Erwinia_amylovora_20070126	53.48	2	incomplete	17	52.87	JAAEXG0100000201_amylovora_strain_20070126_Ea_20070126_contig_20	55689-72700
GCA_012368015.1	Erwinia_amylovora_20070126	53.48	1	incomplete	20.8	49.58	JAAEXG0100000201_amylovora_strain_20070126_Ea_20070126_contig_20	2-20850
GCA_012367995.1	Erwinia_amylovora_20070245	53.52	1	incomplete	23.2	53.48	JAAEXF0100000201_amylovora_strain_20070245_Ea_20070245_contig_20	45844-69100
GCA_012367995.1	Erwinia_amylovora_20070245	53.52	3	incomplete	8.5	46.07	JAAEXF0100000271_amylovora_strain_20070245_Ea_20070245_contig_27	28653-37169
GCA_012367995.1	Erwinia_amylovora_20070245	53.52	2	incomplete	20.8	49.57	JAAEXF0100000201_amylovora_strain_20070245_Ea_20070245_contig_20	102528-123376
GCA_012367975.1	Erwinia_amylovora_20070270	53.52	1	incomplete	23.2	53.48	JAAEXE0100000251_amylovora_strain_20070270_Ea_20070270_contig_25	45843-69099
GCA_012367975.1	Erwinia_amylovora_20070270	53.52	2	incomplete	20.8	49.57	JAAEXE0100000251_amylovora_strain_20070270_Ea_20070270_contig_25	102527-123375
GCA_012367975.1	Erwinia_amylovora_20070270	53.52	3	incomplete	8.3	45.83	JAAEXE0100000311_amylovora_strain_20070270_Ea_20070270_contig_31	51302-59686
GCA_012367845.1	Erwinia_amylovora_214_07	53.52	2	incomplete	20.8	49.57	JAAEWX0100000311_amylovora_strain_214_07_Ea_214_07_contig_31	102530-123378
GCA_012367845.1	Erwinia_amylovora_214_07	53.52	1	incomplete	23.2	53.48	JAAEWX0100000311_amylovora_strain_214_07_Ea_214_07_contig_31	45845-69102
GCA_012367795.1	Erwinia_amylovora_241_07	53.5	3	incomplete	23.2	53.48	JAAEWW0100000061_amylovora_strain_241_07_Ea_241_contig_6	54281-77538
GCA_012367795.1	Erwinia_amylovora_241_07	53.5	2	incomplete	20.8	49.57	JAAEWW0100000061_amylovora_strain_241_07_Ea_241_contig_6	3-20851
GCA_012367795.1	Erwinia_amylovora_241_07	53.5	1	incomplete	8.3	45.72	JAAEWW0100000011_amylovora_strain_241_07_Ea_241_contig_1	112802-121173
GCA_012371915.1	Erwinia_amylovora_245_07	53.52	2	incomplete	23.2	53.48	JAAEWV0100000251_amylovora_strain_245_07_Ea_245_07_contig_25	54279-77536
GCA_012371915.1	Erwinia_amylovora_245_07	53.52	1	incomplete	20.8	49.58	JAAEWV0100000251_amylovora_strain_245_07_Ea_245_07_contig_25	3-20851
GCA_012368075.1	Erwinia_amylovora_2558	53.52	1	incomplete	20.8	49.58	JAAEXJ0100000071_amylovora_strain_2558_Ea_2558_contig_7	2-20850
GCA_012368075.1	Erwinia_amylovora_2558	53.52	2	incomplete	17	52.87	JAAEXJ0100000071_amylovora_strain_2558_Ea_2558_contig_7	55689-72699
GCA_012368065.1	Erwinia_amylovora_2570	53.52	3	incomplete	8.2	45.53	JAAEXI0100000291_amylovora_strain_2570_Ea_2570_contig_29	51303-59532
GCA_012368065.1	Erwinia_amylovora_2570	53.52	1	incomplete	23.2	53.48	JAAEXI0100000141_amylovora_strain_2570_Ea_2570_contig_14	45844-69100
GCA_012368065.1	Erwinia_amylovora_2570	53.52	2	incomplete	20.8	49.58	JAAEXI0100000141_amylovora_strain_2570_Ea_2570_contig_14	102528-123376
GCA_020546605.1	Erwinia_amylovora_32_10	53.49	3	incomplete	8.5	45.98	CP0636911_amylovora_strain_32_10_chromosome	2067733-2076303
GCA_020546605.1	Erwinia_amylovora_32_10	53.49	1	incomplete	16.5	45.85	CP0636911_amylovora_strain_32_10_chromosome	459720-476301
GCA_020546605.1	Erwinia_amylovora_32_10	53.49	4	incomplete	6.4	53.36	CP0636921_amylovora_strain_32_10_plasmid_pEa_IncX	9357-15855
GCA_020546605.1	Erwinia_amylovora_32_10	53.49	2	incomplete	23.2	53.46	CP0636911_amylovora_strain_32_10_chromosome	523091-546347
GCA_022811485.1	Erwinia_amylovora_33_1	53.5	2	incomplete	9.2	53.83	CP0638051_amylovora_strain_33_1_chromosome	2739004-2748235
GCA_022811485.1	Erwinia_amylovora_33_1	53.5	1	incomplete	8.5	45.98	CP0638051_amylovora_strain_33_1_chromosome	963715-972285
GCA_022811485.1	Erwinia_amylovora_33_1	53.5	4	incomplete	23.2	53.46	CP0638051_amylovora_strain_33_1_chromosome	3298014-3321270
GCA_022811485.1	Erwinia_amylovora_33_1	53.5	3	incomplete	15.2	46.03	CP0638051_amylovora_strain_33_1_chromosome	3235981-3251224
GCA_012371885.1	Erwinia_amylovora_3446_1	53.35	4	incomplete	18.2	52.04	JAAEWU0100000081_amylovora_strain_3446_1_Ea_3446_1_contig_8	68272-86516
GCA_012371885.1	Erwinia_amylovora_3446_1	53.35	2	incomplete	15.2	49.57	JAAEWU0100000201_amylovora_strain_3446_1_Ea_3446_1_contig_20	152-15365
GCA_012371885.1	Erwinia_amylovora_3446_1	53.35	3	incomplete	23.2	53.5	JAAEWU0100000201_amylovora_strain_3446_1_Ea_3446_1_contig_20	54131-77388
GCA_012371885.1	Erwinia_amylovora_3446_1	53.35	1	incomplete	5.3	46.55	JAAEWU0100000011_amylovora_strain_3446_1_Ea_3446_1_contig_1	489113-494422
GCA_012367805.1	Erwinia_amylovora_3477_1	53.52	2	incomplete	17	52.87	JAAEWT0100000221_amylovora_strain_3477_1_Ea_3477_1_contig_22	55689-72700
GCA_012367805.1	Erwinia_amylovora_3477_1	53.52	1	incomplete	20.8	49.57	JAAEWT0100000221_amylovora_strain_3477_1_Ea_3477_1_contig_22	2-20850
GCA_012371855.1	Erwinia_amylovora_3515_1	53.52	1	incomplete	13	45.36	JAAEWS0100000161_amylovora_strain_3515_1_Ea_3515_1_contig_16	40580-53639
GCA_012371855.1	Erwinia_amylovora_3515_1	53.52	2	incomplete	7.6	45.11	JAAEWS0100000031_amylovora_strain_3515_1_Ea_3515_1_contig_3	123690-131326
GCA_012371865.1	Erwinia_amylovora_39_I_II	53.55	2	incomplete	20.8	49.57	JAAEWR0100000021_amylovora_strain_39_I_II_39_I_II_contig_2	102528-123376
GCA_012371865.1	Erwinia_amylovora_39_I_II	53.55	1	incomplete	23.2	53.48	JAAEWR0100000021_amylovora_strain_39_I_II_39_I_II_contig_2	45844-69100
GCA_012371865.1	Erwinia_amylovora_39_I_II	53.55	3	incomplete	8.5	45.98	JAAEWR0100000061_amylovora_strain_39_I_II_39_I_II_contig_6	51281-59851
GCA_012367775.1	Erwinia_amylovora_39_M1_II	53.52	1	incomplete	23.2	53.48	JAAEWQ0100000231_amylovora_strain_39_M1_II_39_M1_II_contig_23	45844-69101
GCA_012367775.1	Erwinia_amylovora_39_M1_II	53.52	2	incomplete	20.8	49.58	JAAEWQ0100000231_amylovora_strain_39_M1_II_39_M1_II_contig_23	102530-123378
GCA_012371765.1	Erwinia_amylovora_46_4_2	53.52	2	incomplete	23.2	53.47	JAAEWP0100000181_amylovora_strain_46_4_2_46_4_2_contig_18	54280-77537
GCA_012371765.1	Erwinia_amylovora_46_4_2	53.52	1	incomplete	20.8	49.58	JAAEWP0100000181_amylovora_strain_46_4_2_46_4_2_contig_18	3-20851
GCA_012371765.1	Erwinia_amylovora_46_4_2	53.52	3	incomplete	8.3	45.83	JAAEWP0100000391_amylovora_strain_46_4_2_46_4_2_contig_39	28672-37019
GCA_020544325.1	Erwinia_amylovora_7_3	53.44	1	incomplete	18.5	48.6	CP0636971_amylovora_strain_7_3_chromosome	1847178-1865735
GCA_020544325.1	Erwinia_amylovora_7_3	53.44	2	incomplete	13	45.36	CP0636971_amylovora_strain_7_3_chromosome	3462176-3475236
GCA_000240705.2	Erwinia_amylovora_ACW56400	53.55	2	incomplete	8.5	46.07	AFHN010000071_amylovora_ACW56400_contig_7	968670-977186
GCA_000240705.2	Erwinia_amylovora_ACW56400	53.55	1	incomplete	13	45.36	AFHN010000201_amylovora_ACW56400_contig_21	304260-317320
GCA_017161565.1	Erwinia_amylovora_ATCC_15580	53.58	2	incomplete	13	45.38	CP0667961_amylovora_strain_ATCC_15580_chromosome	3423758-3436816
GCA_017161565.1	Erwinia_amylovora_ATCC_15580	53.58	1	incomplete	8.5	46.07	CP0667961_amylovora_strain_ATCC_15580_chromosome	1897784-1906300
GCA_000027205.1	Erwinia_amylovora_ATCC_49946	53.61	2	incomplete	23.2	53.48	FN6665751_amylovora_ATCC_49946_chromosomal_sequence	399113-422370
GCA_000027205.1	Erwinia_amylovora_ATCC_49946	53.61	3	incomplete	8.5	46.07	FN6665751_amylovora_ATCC_49946_chromosomal_sequence	1932058-1940574
GCA_000027205.1	Erwinia_amylovora_ATCC_49946	53.61	1	incomplete	27.6	48.89	FN6665751_amylovora_ATCC_49946_chromosomal_sequence	337613-365222
GCA_012367755.1	Erwinia_amylovora_BCEa23A	53.53	1	incomplete	15.2	46.03	JAAEWO0100000271_amylovora_strain_BCEa23A_Ea_BC_23A_contig_27	19943-35186
GCA_012367755.1	Erwinia_amylovora_BCEa23A	53.53	2	incomplete	23.2	53.47	JAAEWO0100000271_amylovora_strain_BCEa23A_Ea_BC_23A_contig_27	81976-105232
GCA_002732335.1	Erwinia_amylovora_CA3R	53.41	1	incomplete	15.2	49.58	NQKC010000491_amylovora_strain_CA3R_NODE_10_length_123727_cov_505689	259-15472
GCA_002732335.1	Erwinia_amylovora_CA3R	53.41	2	incomplete	23.2	53.49	NQKC010000491_amylovora_strain_CA3R_NODE_10_length_123727_cov_505689	54238-77496
GCA_002732335.1	Erwinia_amylovora_CA3R	53.41	3	questionable	30.9	53.7	NQKC010000481_amylovora_strain_CA3R_NODE_1_length_1479073_cov_457926	1251583-1282552
GCA_000367625.2	Erwinia_amylovora_CFBP_1232	53.57	3	incomplete	8.5	46.07	CAPB010000201_amylovora_CFBP_1232_WGS_project_CAPB00000000_data	26632-35148
GCA_000367625.2	Erwinia_amylovora_CFBP_1232	53.57	2	incomplete	13	45.36	CAPB010000391_amylovora_CFBP_1232_WGS_project_CAPB00000000_data	249785-262845
GCA_000367625.2	Erwinia_amylovora_CFBP_1232	53.57	1	incomplete	23.2	53.48	CAPB010000391_amylovora_CFBP_1232_WGS_project_CAPB00000000_data	179920-203177
GCA_000091565.1	Erwinia_amylovora_CFBP1430	53.58	1	incomplete	8.5	46.08	FN4341131_amylovora_CFBP1430_complete_genome	1894531-1903047
GCA_000091565.1	Erwinia_amylovora_CFBP1430	53.58	2	incomplete	13	45.36	FN4341131_amylovora_CFBP1430_complete_genome	3418865-3431925
GCA_012367705.1	Erwinia_amylovora_CFBP_1995	53.5	1	incomplete	20.8	49.58	JAAEWN0100000171_amylovora_strain_CFBP_1995_Ea_CFBP1995_contig_17	2-20850
GCA_012367705.1	Erwinia_amylovora_CFBP_1995	53.5	2	incomplete	23.2	53.48	JAAEWN0100000171_amylovora_strain_CFBP_1995_Ea_CFBP1995_contig_17	54278-77535
GCA_012367685.1	Erwinia_amylovora_CFBP_2313	53.5	1	incomplete	18.2	49.15	JAAEWM0100000121_amylovora_strain_CFBP_2313_Ea_CFBP2313_contig_12	118742-136992
GCA_012367685.1	Erwinia_amylovora_CFBP_2313	53.5	2	incomplete	21.7	53.44	JAAEWM0100000221_amylovora_strain_CFBP_2313_Ea_CFBP2313_contig_22	4312-26080
GCA_000367585.2	Erwinia_amylovora_CFBP_2585	53.52	1	incomplete	13	45.37	CAOZ010000111_anylovora_CFBP_2585_WGS_project_CAOZ00000000_data	60878-73935
GCA_000367585.2	Erwinia_amylovora_CFBP_2585	53.52	2	incomplete	19.8	50.45	CAOZ010000071_anylovora_CFBP_2585_WGS_project_CAOZ00000000_data	968284-988119
GCA_012367695.1	Erwinia_amylovora_CFBP_7130	53.49	1	incomplete	23.2	53.48	JAAEWL0100000291_amylovora_strain_CFBP_7130_Ea_CFBP7130_contig_29	45844-69101
GCA_012367695.1	Erwinia_amylovora_CFBP_7130	53.49	2	incomplete	20.8	49.57	JAAEWL0100000291_amylovora_strain_CFBP_7130_Ea_CFBP7130_contig_29	102529-123377
GCA_012367675.1	Erwinia_amylovora_CFBP_7131	53.5	1	incomplete	15.2	49.63	JAAEWK0100000111_amylovora_strain_CFBP_7131_Ea_CFBP7131_contig_11	232-15499
GCA_012367675.1	Erwinia_amylovora_CFBP_7131	53.5	2	incomplete	20.6	53.34	JAAEWK0100000671_amylovora_strain_CFBP_7131_Ea_CFBP7131_contig_67	360-21050
GCA_002732385.1	Erwinia_amylovora_CTBT1_1	53.61	2	incomplete	23.2	53.44	NQJP010000011_amylovora_strain_CTBT1_1_tig00000000	496684-519939
GCA_002732385.1	Erwinia_amylovora_CTBT1_1	53.61	1	incomplete	27.6	48.85	NQJP010000011_amylovora_strain_CTBT1_1_tig00000000	435158-462793
GCA_002732385.1	Erwinia_amylovora_CTBT1_1	53.61	3	incomplete	8.5	45.99	NQJP010000011_amylovora_strain_CTBT1_1_tig00000000	1976285-1984854
GCA_002732205.1	Erwinia_amylovora_CTBT3_1	53.61	2	incomplete	23.2	53.43	NQJO010000011_amylovora_strain_CTBT3_1_tig00000000	479926-503182
GCA_002732205.1	Erwinia_amylovora_CTBT3_1	53.61	1	incomplete	27.6	48.85	NQJO010000011_amylovora_strain_CTBT3_1_tig00000000	418400-446035
GCA_002732205.1	Erwinia_amylovora_CTBT3_1	53.61	3	incomplete	8.5	45.99	NQJO010000011_amylovora_strain_CTBT3_1_tig00000000	1972923-1981493
GCA_002732315.1	Erwinia_amylovora_CTMF03_1	53.48	3	incomplete	23.2	53.43	NQKB010000301_amylovora_strain_CTMF03_1_NODE_9_length_153718_cov_716255	82546-105802
GCA_002732315.1	Erwinia_amylovora_CTMF03_1	53.48	2	incomplete	27.6	48.85	NQKB010000301_amylovora_strain_CTMF03_1_NODE_9_length_153718_cov_716255	21019-48655
GCA_002732315.1	Erwinia_amylovora_CTMF03_1	53.48	1	incomplete	8.5	45.99	NQKB010000561_amylovora_strain_CTMF03_1_NODE_1_length_1322132_cov_648835	345230-353800
GCA_002732295.1	Erwinia_amylovora_CTST01_1	53.53	1	incomplete	8.5	45.99	NQKA010000641_amylovora_strain_CTST01_1_NODE_1_length_1321468_cov_539748	344308-352878
GCA_002732295.1	Erwinia_amylovora_CTST01_1	53.53	3	incomplete	23.2	53.44	NQKA010000241_amylovora_strain_CTST01_1_NODE_9_length_153626_cov_603564	82453-105710
GCA_002732295.1	Erwinia_amylovora_CTST01_1	53.53	2	incomplete	27.6	48.85	NQKA010000241_amylovora_strain_CTST01_1_NODE_9_length_153626_cov_603564	20926-48562
GCA_012371795.1	Erwinia_amylovora_E2005A	53.51	3	incomplete	8.2	45.68	JAAEWJ0100000181_amylovora_strain_E2005A_Ea_E2005A_contig_18	51204-59406
GCA_012371795.1	Erwinia_amylovora_E2005A	53.51	2	incomplete	23.2	53.47	JAAEWJ0100000101_amylovora_strain_E2005A_Ea_E2005A_contig_10	54278-77533
GCA_012371795.1	Erwinia_amylovora_E2005A	53.51	1	incomplete	20.8	49.58	JAAEWJ0100000101_amylovora_strain_E2005A_Ea_E2005A_contig_10	2-20850
GCA_012367615.1	Erwinia_amylovora_E2006P	53.48	1	incomplete	13.7	53.17	JAAEWI0100000101_amylovora_strain_E2006P_Ea_E2006P_contig_10	68300-82039
GCA_012367615.1	Erwinia_amylovora_E2006P	53.48	2	intact	33.4	53.37	JAAEWI0100000121_amylovora_strain_E2006P_Ea_E2006P_contig_12	3-33498
GCA_012367615.1	Erwinia_amylovora_E2006P	53.48	4	intact	16.4	49.94	JAAEWI0100000431_amylovora_strain_E2006P_Ea_E2006P_contig_43	6753-23182
GCA_012367615.1	Erwinia_amylovora_E2006P	53.48	5	incomplete	17	52.92	JAAEWI0100000061_amylovora_strain_E2006P_Ea_E2006P_contig_6	50659-67671
GCA_012367615.1	Erwinia_amylovora_E2006P	53.48	3	questionable	31.4	50.1	JAAEWI0100000211_amylovora_strain_E2006P_Ea_E2006P_contig_21	113745-145184
GCA_002803865.1	Erwinia_amylovora_E_2	53.58	3	incomplete	8.5	46.07	CP0249701_amylovora_strain_E_2_chromosome	1931327-1939843
GCA_002803865.1	Erwinia_amylovora_E_2	53.58	2	incomplete	23.2	53.47	CP0249701_amylovora_strain_E_2_chromosome	399122-422379
GCA_002803865.1	Erwinia_amylovora_E_2	53.58	1	incomplete	27.6	48.89	CP0249701_amylovora_strain_E_2_chromosome	337613-365222
GCA_012367655.1	Erwinia_amylovora_Ea01_03	53.49	1	questionable	13.3	49.45	JAAEWH0100000221_amylovora_strain_Ea01_03_Ea01_03_contig_22	9712-23061
GCA_012367655.1	Erwinia_amylovora_Ea01_03	53.49	4	incomplete	17	52.91	JAAEWH0100000601_amylovora_strain_Ea01_03_Ea01_03_contig_60	2503-19515
GCA_012367655.1	Erwinia_amylovora_Ea01_03	53.49	3	incomplete	14.3	49.54	JAAEWH0100000411_amylovora_strain_Ea01_03_Ea01_03_contig_41	44462-58826
GCA_012367655.1	Erwinia_amylovora_Ea01_03	53.49	2	incomplete	24.3	51.98	JAAEWH0100000231_amylovora_strain_Ea01_03_Ea01_03_contig_23	113994-138388
GCA_012367585.1	Erwinia_amylovora_Ea02_03	53.3	1	intact	27	49.25	JAAEWG0100000011_amylovora_strain_Ea02_03_Ea_02_03_contig_1	357348-384349
GCA_012367585.1	Erwinia_amylovora_Ea02_03	53.3	2	incomplete	10.8	52.67	JAAEWG0100000051_amylovora_strain_Ea02_03_Ea_02_03_contig_5	56-10880
GCA_012367595.1	Erwinia_amylovora_Ea03_03	53.26	2	intact	27	49.25	JAAEWF0100000071_amylovora_strain_Ea03_03_Ea_03_03_contig_7	107391-134392
GCA_012367595.1	Erwinia_amylovora_Ea03_03	53.26	1	incomplete	22.5	53.04	JAAEWF0100000101_amylovora_strain_Ea03_03_Ea_03_03_contig_10	92546-115074
GCA_012371815.1	Erwinia_amylovora_Ea04_03	53.31	3	questionable	11.3	52.74	JAAEWE0100000271_amylovora_strain_Ea04_03_Ea_04_03_contig_27	145586-156962
GCA_012371815.1	Erwinia_amylovora_Ea04_03	53.31	2	incomplete	9.7	52.6	JAAEWE0100000171_amylovora_strain_Ea04_03_Ea_04_03_contig_17	140-9860
GCA_012371815.1	Erwinia_amylovora_Ea04_03	53.31	1	intact	38.7	54.26	JAAEWE0100000131_amylovora_strain_Ea04_03_Ea_04_03_contig_13	102493-141243
GCA_012371775.1	Erwinia_amylovora_Ea1_00	53.49	1	incomplete	23.2	53.52	JAAEWD0100000011_amylovora_strain_Ea1_00_Ea1_00_contig_1	3638-26896
GCA_012371775.1	Erwinia_amylovora_Ea1_00	53.49	4	incomplete	14	49.02	JAAEWD0100000371_amylovora_strain_Ea1_00_Ea1_00_contig_37	35210-49263
GCA_012371775.1	Erwinia_amylovora_Ea1_00	53.49	2	incomplete	24.3	51.98	JAAEWD0100000021_amylovora_strain_Ea1_00_Ea1_00_contig_2	345148-369542
GCA_012371775.1	Erwinia_amylovora_Ea1_00	53.49	3	questionable	13.3	49.45	JAAEWD0100000341_amylovora_strain_Ea1_00_Ea1_00_contig_34	10911-24260
GCA_002732505.1	Erwinia_amylovora_EA110	53.52	3	incomplete	23.2	53.48	NQJZ010000041_amylovora_strain_EA110_NODE_9_length_125558_cov_540747	54385-77642
GCA_002732505.1	Erwinia_amylovora_EA110	53.52	2	incomplete	20.8	49.58	NQJZ010000041_amylovora_strain_EA110_NODE_9_length_125558_cov_540747	109-20957
GCA_002732505.1	Erwinia_amylovora_EA110	53.52	1	incomplete	8.5	45.98	NQJZ010000571_amylovora_strain_EA110_NODE_1_length_1465178_cov_486052	487768-496338
GCA_012367575.1	Erwinia_amylovora_Ea116_5_29	53.52	1	incomplete	20.8	49.58	JAAEWC0100000161_amylovora_strain_Ea116_5_29_Ea_116_5_29_contig_16	2-20850
GCA_012367575.1	Erwinia_amylovora_Ea116_5_29	53.52	3	incomplete	8.4	45.76	JAAEWC0100000031_amylovora_strain_Ea116_5_29_Ea_116_5_29_contig_3	123771-132171
GCA_012367575.1	Erwinia_amylovora_Ea116_5_29	53.52	2	incomplete	23.2	53.48	JAAEWC0100000161_amylovora_strain_Ea116_5_29_Ea_116_5_29_contig_16	54278-77534
GCA_016446415.2	Erwinia_amylovora_Ea1189	53.58	2	incomplete	23.2	53.48	CP0552272_amylovora_strain_Ea1189_chromosome	398156-421413
GCA_016446415.2	Erwinia_amylovora_Ea1189	53.58	3	incomplete	8.5	45.98	CP0552272_amylovora_strain_Ea1189_chromosome	1860976-1869546
GCA_016446415.2	Erwinia_amylovora_Ea1189	53.58	1	incomplete	27.6	48.89	CP0552272_amylovora_strain_Ea1189_chromosome	336656-364265
GCA_012367535.1	Erwinia_amylovora_Ea123_5_51	53.52	1	intact	42.5	53.97	JAAEWA0100000261_amylovora_strain_Ea123_5_51_Ea_123_5_51_contig_26	111646-154151
GCA_012367545.1	Erwinia_amylovora_Ea12	53.55	1	incomplete	13	45.36	JAAEWB0100000141_amylovora_strain_Ea12_Ea12_contig_14	67491-80550
GCA_012367495.1	Erwinia_amylovora_Ea160_3_51	53.49	1	incomplete	23.2	53.44	JAAEVZ0100000051_amylovora_strain_Ea160_3_51_Ea_160_3_51_contig_5	45844-69100
GCA_012367495.1	Erwinia_amylovora_Ea160_3_51	53.49	2	incomplete	13	45.32	JAAEVZ0100000051_amylovora_strain_Ea160_3_51_Ea_160_3_51_contig_5	115707-128794
GCA_012371755.1	Erwinia_amylovora_Ea160_4_51	53.46	3	incomplete	12.3	45.94	JAAEVY0100000321_amylovora_strain_Ea160_4_51_Ea_160_4_51_contig_32	115949-128308
GCA_012371755.1	Erwinia_amylovora_Ea160_4_51	53.46	1	incomplete	31.3	53.7	JAAEVY0100000141_amylovora_strain_Ea160_4_51_Ea_160_4_51_contig_14	57964-89299
GCA_012371755.1	Erwinia_amylovora_Ea160_4_51	53.46	2	incomplete	23.2	53.51	JAAEVY0100000321_amylovora_strain_Ea160_4_51_Ea_160_4_51_contig_32	46089-69350
GCA_012371755.1	Erwinia_amylovora_Ea160_4_51	53.46	4	questionable	31.4	50.1	JAAEVY0100000081_amylovora_strain_Ea160_4_51_Ea_160_4_51_contig_8	28659-60098
GCA_012367485.1	Erwinia_amylovora_Ea169	53.52	2	incomplete	23.2	53.48	JAAEVX0100000291_amylovora_strain_Ea169_Ea_169_contig_29	54278-77535
GCA_012367485.1	Erwinia_amylovora_Ea169	53.52	1	incomplete	20.8	49.58	JAAEVX0100000291_amylovora_strain_Ea169_Ea_169_contig_29	2-20850
GCA_012371695.1	Erwinia_amylovora_Ea17_1_1	53.52	2	incomplete	20.8	49.57	JAAEVW0100000021_amylovora_strain_Ea17_1_1_Ea17_1_1_contig_2	102527-123375
GCA_012371695.1	Erwinia_amylovora_Ea17_1_1	53.52	1	incomplete	23.2	53.48	JAAEVW0100000021_amylovora_strain_Ea17_1_1_Ea17_1_1_contig_2	45844-69099
GCA_015650045.1	Erwinia_amylovora_Ea1_79Sm	53.58	2	incomplete	13	45.37	CP0648551_amylovora_strain_Ea1_79Sm_chromosome	3424140-3437200
GCA_015650045.1	Erwinia_amylovora_Ea1_79Sm	53.58	1	incomplete	8.5	46.07	CP0648551_amylovora_strain_Ea1_79Sm_chromosome	1898306-1906822
GCA_012367475.1	Erwinia_amylovora_Ea1_95	53.33	1	incomplete	21.2	53.04	JAAEVV0100000151_amylovora_strain_Ea1_95_Ea1_95_contig_15	95811-117039
GCA_012367475.1	Erwinia_amylovora_Ea1_95	53.33	2	intact	29.3	50.14	JAAEVV0100000021_amylovora_strain_Ea1_95_Ea1_95_contig_2	221757-251144
GCA_012367455.1	Erwinia_amylovora_Ea1_97	53.23	3	questionable	29.5	50.11	JAAEVU0100000631_amylovora_strain_Ea1_97_Ea1_97_contig_63	21796-51326
GCA_012367455.1	Erwinia_amylovora_Ea1_97	53.23	2	incomplete	18.4	52.48	JAAEVU0100000301_amylovora_strain_Ea1_97_Ea1_97_contig_30	865-19348
GCA_012367455.1	Erwinia_amylovora_Ea1_97	53.23	1	incomplete	31.3	53.43	JAAEVU0100000191_amylovora_strain_Ea1_97_Ea1_97_contig_19	59022-90363
GCA_012367425.1	Erwinia_amylovora_Ea1_98	53.39	2	questionable	11.7	52.63	JAAEVT0100000441_amylovora_strain_Ea1_98_Ea_1_98_contig_44	1199-12981
GCA_012367425.1	Erwinia_amylovora_Ea1_98	53.39	1	incomplete	17	53.33	JAAEVT0100000171_amylovora_strain_Ea1_98_Ea_1_98_contig_17	66-17103
GCA_000367565.2	Erwinia_amylovora_Ea266	53.57	3	incomplete	8.5	46.08	CAOY010000151_amylovora_Ea266_WGS_project_CAOY00000000_data	13001-21517
GCA_000367565.2	Erwinia_amylovora_Ea266	53.57	2	incomplete	17.9	50.11	CAOY010000341_amylovora_Ea266_WGS_project_CAOY00000000_data	242240-260186
GCA_000367565.2	Erwinia_amylovora_Ea266	53.57	1	incomplete	23.2	53.48	CAOY010000341_amylovora_Ea266_WGS_project_CAOY00000000_data	182055-205314
GCA_012367415.1	Erwinia_amylovora_Ea2_95	53.26	2	incomplete	19.6	53	JAAEVS0100000071_amylovora_strain_Ea2_95_Ea2_95_contig_7	70810-90448
GCA_012367415.1	Erwinia_amylovora_Ea2_95	53.26	1	incomplete	31.5	53.59	JAAEVS0100000321_amylovora_strain_Ea2_95_Ea2_95_contig_32	59014-90557
GCA_012367365.1	Erwinia_amylovora_Ea2_97	53.24	3	questionable	11.7	52.6	JAAEVQ0100000321_amylovora_strain_Ea2_97_Ea_2_97_contig_32	126838-138611
GCA_012367365.1	Erwinia_amylovora_Ea2_97	53.24	1	incomplete	13.1	51.93	JAAEVQ0100000011_amylovora_strain_Ea2_97_Ea_2_97_contig_1	104261-117456
GCA_012367365.1	Erwinia_amylovora_Ea2_97	53.24	2	intact	32.9	52.95	JAAEVQ0100000031_amylovora_strain_Ea2_97_Ea_2_97_contig_3	107653-140567
GCA_012367375.1	Erwinia_amylovora_Ea29_7	53.51	1	incomplete	23.2	53.48	JAAEVR0100000331_amylovora_strain_Ea29_7_Ea29_7_contig_33	45845-69101
GCA_012367375.1	Erwinia_amylovora_Ea29_7	53.51	2	incomplete	20.8	49.57	JAAEVR0100000331_amylovora_strain_Ea29_7_Ea29_7_contig_33	102529-123377
GCA_012367375.1	Erwinia_amylovora_Ea29_7	53.51	3	incomplete	8.1	45.7	JAAEVR0100000041_amylovora_strain_Ea29_7_Ea29_7_contig_4	505889-514055
GCA_012367355.1	Erwinia_amylovora_Ea315_1	53.52	2	incomplete	23.2	53.48	JAAEVP0100000161_amylovora_strain_Ea315_1_Ea_315_1_contig_16	54279-77535
GCA_012367355.1	Erwinia_amylovora_Ea315_1	53.52	3	incomplete	8.5	45.98	JAAEVP0100000031_amylovora_strain_Ea315_1_Ea_315_1_contig_3	51256-59826
GCA_012367355.1	Erwinia_amylovora_Ea315_1	53.52	1	incomplete	20.8	49.58	JAAEVP0100000161_amylovora_strain_Ea315_1_Ea_315_1_contig_16	3-20851
GCA_003992295.1	Erwinia_amylovora_Ea321	53.52	3	incomplete	23.2	53.48	MCFB010000021_amylovora_strain_Ea321_NODE_10	54385-77642
GCA_003992295.1	Erwinia_amylovora_Ea321	53.52	2	incomplete	20.8	49.58	MCFB010000021_amylovora_strain_Ea321_NODE_10	109-20957
GCA_003992295.1	Erwinia_amylovora_Ea321	53.52	1	incomplete	8.5	45.98	MCFB010000011_amylovora_strain_Ea321_NODE_1	487953-496523
GCA_000367545.2	Erwinia_amylovora_Ea356	53.57	3	incomplete	8.5	46.07	CAOX010000071_amylovora_Ea356_WS_project_CAOX00000000_data	968877-977393
GCA_000367545.2	Erwinia_amylovora_Ea356	53.57	2	incomplete	13	45.37	CAOX010000131_amylovora_Ea356_WS_project_CAOX00000000_data	220716-233776
GCA_000367545.2	Erwinia_amylovora_Ea356	53.57	1	incomplete	23.2	53.48	CAOX010000131_amylovora_Ea356_WS_project_CAOX00000000_data	150849-174109
GCA_012367305.1	Erwinia_amylovora_Ea367	53.53	1	incomplete	23.2	53.48	JAAEVN0100000031_amylovora_strain_Ea367_Ea_367_contig_3	45845-69102
GCA_012367305.1	Erwinia_amylovora_Ea367	53.53	2	incomplete	20.8	49.58	JAAEVN0100000031_amylovora_strain_Ea367_Ea_367_contig_3	102530-123378
GCA_012367325.1	Erwinia_amylovora_Ea3_97	53.23	1	intact	32.9	52.95	JAAEVM0100000391_amylovora_strain_Ea3_97_Ea_3_97_contig_39	6541-39455
GCA_012367325.1	Erwinia_amylovora_Ea3_97	53.23	3	incomplete	13.1	51.93	JAAEVM0100000091_amylovora_strain_Ea3_97_Ea_3_97_contig_9	104063-117258
GCA_012367325.1	Erwinia_amylovora_Ea3_97	53.23	2	questionable	22.2	51.2	JAAEVM0100000051_amylovora_strain_Ea3_97_Ea_3_97_contig_5	18933-41169
GCA_012367265.1	Erwinia_amylovora_Ea3a_H1_II	53.52	1	incomplete	8.1	45.65	JAAEVL0100000161_amylovora_strain_Ea3a_H1_II_Ea3a_H1_II_contig_16	112807-120972
GCA_012367265.1	Erwinia_amylovora_Ea3a_H1_II	53.52	2	incomplete	20.8	49.58	JAAEVL0100000281_amylovora_strain_Ea3a_H1_II_Ea3a_H1_II_contig_28	2-20850
GCA_012367265.1	Erwinia_amylovora_Ea3a_H1_II	53.52	3	incomplete	23.2	53.47	JAAEVL0100000281_amylovora_strain_Ea3a_H1_II_Ea3a_H1_II_contig_28	54279-77536
GCA_012371655.1	Erwinia_amylovora_Ea433	53.48	2	incomplete	23.2	53.43	JAAEVK0100000121_amylovora_strain_Ea433_Ea_433_contig_12	82013-105269
GCA_012371655.1	Erwinia_amylovora_Ea433	53.48	3	incomplete	8.5	45.99	JAAEVK0100000041_amylovora_strain_Ea433_Ea_433_contig_4	51220-59790
GCA_012371655.1	Erwinia_amylovora_Ea433	53.48	1	incomplete	27.6	48.85	JAAEVK0100000121_amylovora_strain_Ea433_Ea_433_contig_12	20477-48122
GCA_012367255.1	Erwinia_amylovora_Ea435	53.52	1	incomplete	20.8	49.57	JAAEVJ0100000211_amylovora_strain_Ea435_Ea_435_contig_21	2-20851
GCA_012367255.1	Erwinia_amylovora_Ea435	53.52	2	incomplete	23.2	53.48	JAAEVJ0100000211_amylovora_strain_Ea435_Ea_435_contig_21	54279-77536
GCA_012367255.1	Erwinia_amylovora_Ea435	53.52	3	incomplete	8.5	45.98	JAAEVJ0100000231_amylovora_strain_Ea435_Ea_435_contig_23	51535-60105
GCA_012367195.1	Erwinia_amylovora_Ea440	53.52	1	incomplete	20.8	49.57	JAAEVI0100000281_amylovora_strain_Ea440_Ea_440_contig_28	2-20850
GCA_012367195.1	Erwinia_amylovora_Ea440	53.52	2	incomplete	23.2	53.48	JAAEVI0100000281_amylovora_strain_Ea440_Ea_440_contig_28	54278-77535
GCA_012371675.1	Erwinia_amylovora_Ea464	53.52	2	incomplete	20.8	49.58	JAAEVH0100000101_amylovora_strain_Ea464_Ea_464_contig_10	102529-123377
GCA_012371675.1	Erwinia_amylovora_Ea464	53.52	1	incomplete	23.2	53.48	JAAEVH0100000101_amylovora_strain_Ea464_Ea_464_contig_10	45844-69101
GCA_012367175.1	Erwinia_amylovora_Ea4_96	53.24	2	incomplete	13.1	51.93	JAAEVG0100000311_amylovora_strain_Ea4_96_Ea_4_96_contig_31	624-13819
GCA_012367175.1	Erwinia_amylovora_Ea4_96	53.24	3	intact	32.6	53.03	JAAEVG0100000531_amylovora_strain_Ea4_96_Ea_4_96_contig_53	48-32666
GCA_012367175.1	Erwinia_amylovora_Ea4_96	53.24	1	questionable	22.2	51.22	JAAEVG0100000101_amylovora_strain_Ea4_96_Ea_4_96_contig_10	107109-129342
GCA_012367185.1	Erwinia_amylovora_Ea4_97	53.52	2	incomplete	23.2	53.48	JAAEVF0100000151_amylovora_strain_Ea4_97_Ea_4_97_contig_15	54278-77535
GCA_012367185.1	Erwinia_amylovora_Ea4_97	53.52	1	incomplete	20.8	49.57	JAAEVF0100000151_amylovora_strain_Ea4_97_Ea_4_97_contig_15	2-20850
GCA_012367165.1	Erwinia_amylovora_Ea5_97	53.52	2	incomplete	23.2	53.48	JAAEVE0100000311_amylovora_strain_Ea5_97_Ea_5_97_contig_31	54279-77536
GCA_012367165.1	Erwinia_amylovora_Ea5_97	53.52	1	incomplete	20.8	49.57	JAAEVE0100000311_amylovora_strain_Ea5_97_Ea_5_97_contig_31	3-20851
GCA_000367665.2	Erwinia_amylovora_Ea644	53.26	2	incomplete	25.7	49.86	CAPD010000051_amylovora_Ea644_WGS_project_CAPD00000000_data	155349-181098
GCA_000367665.2	Erwinia_amylovora_Ea644	53.26	1	questionable	18.3	51.16	CAPD010000131_amylovora_Ea644_WGS_project_CAPD00000000_data	634189-652525
GCA_012371685.1	Erwinia_amylovora_Ea6_4	53.52	2	incomplete	23.2	53.47	JAAEVD0100000171_amylovora_strain_Ea6_4_Ea6_4_contig_17	54279-77534
GCA_012371685.1	Erwinia_amylovora_Ea6_4	53.52	1	incomplete	20.8	49.58	JAAEVD0100000171_amylovora_strain_Ea6_4_Ea6_4_contig_17	3-20851
GCA_012367155.1	Erwinia_amylovora_Ea650	53.52	2	incomplete	20.8	49.57	JAAEVC0100000171_amylovora_strain_Ea650_Ea_650_contig_17	102530-123378
GCA_012367155.1	Erwinia_amylovora_Ea650	53.52	1	incomplete	23.2	53.48	JAAEVC0100000171_amylovora_strain_Ea650_Ea_650_contig_17	45845-69102
GCA_012371665.1	Erwinia_amylovora_Ea6_96	53.26	1	incomplete	18.2	50.38	JAAEVB0100000241_amylovora_strain_Ea6_96_Ea_6_96_contig_24	115160-133359
GCA_012371665.1	Erwinia_amylovora_Ea6_96	53.26	3	incomplete	10.3	51.02	JAAEVB0100000381_amylovora_strain_Ea6_96_Ea_6_96_contig_38	22760-33152
GCA_012371665.1	Erwinia_amylovora_Ea6_96	53.26	5	intact	31.2	54.8	JAAEVB0100000081_amylovora_strain_Ea6_96_Ea_6_96_contig_8	1-31267
GCA_012371665.1	Erwinia_amylovora_Ea6_96	53.26	4	questionable	11.8	52.65	JAAEVB0100000461_amylovora_strain_Ea6_96_Ea_6_96_contig_46	1621-13435
GCA_012371665.1	Erwinia_amylovora_Ea6_96	53.26	2	incomplete	9.7	52.57	JAAEVB0100000331_amylovora_strain_Ea6_96_Ea_6_96_contig_33	139-9858
GCA_012367125.1	Erwinia_amylovora_Ea6_97	53.52	2	incomplete	23.2	53.48	JAAEVA0100000161_amylovora_strain_Ea6_97_Ea_6_97_contig_16	54279-77536
GCA_012367125.1	Erwinia_amylovora_Ea6_97	53.52	1	incomplete	20.8	49.57	JAAEVA0100000161_amylovora_strain_Ea6_97_Ea_6_97_contig_16	3-20851
GCA_012371615.1	Erwinia_amylovora_Ea7_96	53.3	1	incomplete	21.2	53.03	JAAEUZ0100000341_amylovora_strain_Ea7_96_Ea_7_96_contig_34	94955-116184
GCA_012371615.1	Erwinia_amylovora_Ea7_96	53.3	2	intact	22.1	51.22	JAAEUZ0100000091_amylovora_strain_Ea7_96_Ea_7_96_contig_9	1-22189
GCA_012367085.1	Erwinia_amylovora_Ea8_96	53.25	1	questionable	11.4	52.75	JAAEUY0100000021_amylovora_strain_Ea8_96_Ea_8_96_contig_2	3368-14770
GCA_012367085.1	Erwinia_amylovora_Ea8_96	53.25	3	incomplete	9.7	52.57	JAAEUY0100000051_amylovora_strain_Ea8_96_Ea_8_96_contig_5	140-9859
GCA_012367085.1	Erwinia_amylovora_Ea8_96	53.25	5	intact	40.6	53.77	JAAEUY0100000091_amylovora_strain_Ea8_96_Ea_8_96_contig_9	102530-143155
GCA_012367085.1	Erwinia_amylovora_Ea8_96	53.25	2	incomplete	18.1	50.39	JAAEUY0100000031_amylovora_strain_Ea8_96_Ea_8_96_contig_3	91505-109649
GCA_012367085.1	Erwinia_amylovora_Ea8_96	53.25	4	incomplete	10.3	51.02	JAAEUY0100000501_amylovora_strain_Ea8_96_Ea_8_96_contig_50	215-10607
GCA_012371585.1	Erwinia_amylovora_Ea92_1_1	53.52	1	incomplete	23.2	53.48	JAAEUX0100000021_amylovora_strain_Ea92_1_1_Ea_92_1_1_contig_2	45844-69101
GCA_012371585.1	Erwinia_amylovora_Ea92_1_1	53.52	2	incomplete	20.8	49.57	JAAEUX0100000021_amylovora_strain_Ea92_1_1_Ea_92_1_1_contig_2	102529-123377
GCA_012367095.1	Erwinia_amylovora_Ea92_1_2	53.52	2	incomplete	20.8	49.57	JAAEUW0100000171_amylovora_strain_Ea92_1_2_Ea_92_1_2_contig_17	102530-123378
GCA_012367095.1	Erwinia_amylovora_Ea92_1_2	53.52	1	incomplete	23.2	53.48	JAAEUW0100000171_amylovora_strain_Ea92_1_2_Ea_92_1_2_contig_17	45845-69102
GCA_012367075.1	Erwinia_amylovora_EaA_11	53.46	1	incomplete	19	51.76	JAAEUV0100000181_amylovora_strain_EaA_11_Ea_A_11_contig_18	5179-24210
GCA_012371565.1	Erwinia_amylovora_EaB_110	53.54	2	incomplete	23.2	53.48	JAAEUU0100000071_amylovora_strain_EaB_110_Ea_B_110_contig_7	54278-77535
GCA_012371565.1	Erwinia_amylovora_EaB_110	53.54	1	incomplete	20.8	49.58	JAAEUU0100000071_amylovora_strain_EaB_110_Ea_B_110_contig_7	2-20850
GCA_012371575.1	Erwinia_amylovora_EaD_7	53.51	1	incomplete	20.8	49.58	JAAEUT0100000231_amylovora_strain_EaD_7_Ea_D_7_contig_23	3-20851
GCA_012371575.1	Erwinia_amylovora_EaD_7	53.51	2	incomplete	23.2	53.48	JAAEUT0100000231_amylovora_strain_EaD_7_Ea_D_7_contig_23	54279-77535
GCA_012371575.1	Erwinia_amylovora_EaD_7	53.51	3	incomplete	8.1	45.76	JAAEUT0100000041_amylovora_strain_EaD_7_Ea_D_7_contig_4	28666-36821
GCA_012367055.1	Erwinia_amylovora_EaG5	53.52	3	incomplete	23.2	53.43	JAAEUS0100000261_amylovora_strain_EaG5_Ea_G5_contig_26	82025-105281
GCA_012367055.1	Erwinia_amylovora_EaG5	53.52	2	incomplete	27.6	48.84	JAAEUS0100000261_amylovora_strain_EaG5_Ea_G5_contig_26	20480-48134
GCA_012367055.1	Erwinia_amylovora_EaG5	53.52	1	incomplete	8.5	46.08	JAAEUS0100000021_amylovora_strain_EaG5_Ea_G5_contig_2	28653-37169
GCA_012371555.1	Erwinia_amylovora_EaIF	53.36	1	incomplete	12.3	45.94	JAAEUR0100000561_amylovora_strain_EaIF_Ea_IF_contig_56	40484-52833
GCA_012371555.1	Erwinia_amylovora_EaIF	53.36	2	incomplete	23.2	53.5	JAAEUR0100000061_amylovora_strain_EaIF_Ea_IF_contig_6	6054-29310
GCA_012367015.1	Erwinia_amylovora_EaLevo2	53.27	1	incomplete	22.5	53.03	JAAEUQ0100000011_amylovora_strain_EaLevo2_Ea_Levo_2_contig_1	95802-118330
GCA_012367015.1	Erwinia_amylovora_EaLevo2	53.27	2	incomplete	29.1	53.32	JAAEUQ0100000051_amylovora_strain_EaLevo2_Ea_Levo_2_contig_5	67352-96511
GCA_012980845.1	Erwinia_amylovora_FB_207	53.58	2	incomplete	23.2	53.48	CP0502631_amylovora_strain_FB_207_chromosome	398545-421802
GCA_012980845.1	Erwinia_amylovora_FB_207	53.58	1	incomplete	27.6	48.88	CP0502631_amylovora_strain_FB_207_chromosome	337045-364654
GCA_012980845.1	Erwinia_amylovora_FB_207	53.58	3	incomplete	8.5	45.98	CP0502631_amylovora_strain_FB_207_chromosome	1866658-1875228
GCA_012980765.1	Erwinia_amylovora_FB_20	53.58	3	incomplete	8.5	45.98	CP0502401_amylovora_strain_FB_20_chromosome	1866185-1874755
GCA_012980765.1	Erwinia_amylovora_FB_20	53.58	1	incomplete	27.6	48.88	CP0502401_amylovora_strain_FB_20_chromosome	337045-364654
GCA_012980765.1	Erwinia_amylovora_FB_20	53.58	2	incomplete	23.2	53.48	CP0502401_amylovora_strain_FB_20_chromosome	398545-421802
GCA_012980805.1	Erwinia_amylovora_FB_307	53.58	1	incomplete	27.6	48.88	CP0502421_amylovora_strain_FB_307_chromosome	337045-364654
GCA_012980805.1	Erwinia_amylovora_FB_307	53.58	3	incomplete	8.5	45.98	CP0502421_amylovora_strain_FB_307_chromosome	1866536-1875106
GCA_012980805.1	Erwinia_amylovora_FB_307	53.58	2	incomplete	23.2	53.48	CP0502421_amylovora_strain_FB_307_chromosome	398545-421802
GCA_012980785.1	Erwinia_amylovora_FB_86	53.58	3	incomplete	8.5	45.98	CP0502581_amylovora_strain_FB_86_chromosome	1866658-1875228
GCA_012980785.1	Erwinia_amylovora_FB_86	53.58	2	incomplete	23.2	53.48	CP0502581_amylovora_strain_FB_86_chromosome	398545-421802
GCA_012980785.1	Erwinia_amylovora_FB_86	53.58	1	incomplete	27.6	48.88	CP0502581_amylovora_strain_FB_86_chromosome	337045-364654
GCA_012371505.1	Erwinia_amylovora_Fb_97b	53.53	1	incomplete	20.8	49.58	JAAEUP0100000291_amylovora_strain_Fb_97b_Ea_Fb97b_contig_29	3-20851
GCA_012371505.1	Erwinia_amylovora_Fb_97b	53.53	2	incomplete	23.2	53.48	JAAEUP0100000291_amylovora_strain_Fb_97b_Ea_Fb97b_contig_29	54279-77536
GCA_004023365.1	Erwinia_amylovora_HKN06P1	53.5	1	incomplete	8.5	46.07	RQKG010000011_amylovora_strain_HKN06P1_NODE_1_length_641239_cov_115926	507832-516348
GCA_004023365.1	Erwinia_amylovora_HKN06P1	53.5	2	incomplete	13	45.37	RQKG010000071_amylovora_strain_HKN06P1_NODE_7_length_199954_cov_121952	164209-177269
GCA_012371495.1	Erwinia_amylovora_IH_3_1	53.21	1	incomplete	17	52.91	JAAEUO0100000051_amylovora_strain_IH_3_1_Ea_IH_3_1_contig_5	2446-19456
GCA_012371495.1	Erwinia_amylovora_IH_3_1	53.21	2	incomplete	12.3	45.94	JAAEUO0100000051_amylovora_strain_IH_3_1_Ea_IH_3_1_contig_5	67466-79815
GCA_012366985.1	Erwinia_amylovora_IVIA2303	53.52	2	incomplete	20.8	49.57	JAAEUN0100000181_amylovora_strain_IVIA2303_Ea_IVIA2303_contig_18	102528-123376
GCA_012366985.1	Erwinia_amylovora_IVIA2303	53.52	1	incomplete	23.2	53.48	JAAEUN0100000181_amylovora_strain_IVIA2303_Ea_IVIA2303_contig_18	45844-69100
GCA_002732285.1	Erwinia_amylovora_LA092	53.62	2	incomplete	15.2	46.03	NQJY010000201_amylovora_strain_LA092_NODE_8_length_153602_cov_545155	20399-35641
GCA_002732285.1	Erwinia_amylovora_LA092	53.62	3	incomplete	23.2	53.47	NQJY010000201_amylovora_strain_LA092_NODE_8_length_153602_cov_545155	82431-105687
GCA_002732285.1	Erwinia_amylovora_LA092	53.62	1	incomplete	8.5	46.07	NQJY010000231_amylovora_strain_LA092_NODE_1_length_1666756_cov_506124	968782-977298
GCA_012371465.1	Erwinia_amylovora_LA472	53.52	2	incomplete	23.2	53.47	JAAEUM0100000161_amylovora_strain_LA472_Ea_LA472_contig_16	82024-105280
GCA_012371465.1	Erwinia_amylovora_LA472	53.52	1	incomplete	15.2	46.03	JAAEUM0100000161_amylovora_strain_LA472_Ea_LA472_contig_16	19991-35234
GCA_000513415.1	Erwinia_amylovora_LA635	53.59	3	incomplete	13	45.37	CBVS0100000071_amylovora_LA635_WGS_project_CBVS000000000_data	601586-614646
GCA_000513415.1	Erwinia_amylovora_LA635	53.59	1	incomplete	8.5	46.08	CBVS0100000061_amylovora_LA635_WGS_project_CBVS000000000_data	968320-976836
GCA_000513415.1	Erwinia_amylovora_LA635	53.59	2	incomplete	23.2	53.48	CBVS0100000071_amylovora_LA635_WGS_project_CBVS000000000_data	531722-554979
GCA_000513395.1	Erwinia_amylovora_LA636	53.59	3	incomplete	13	45.37	CBVT0100000071_amylovora_LA636_WGS_project_CBVT000000000_data	601586-614646
GCA_000513395.1	Erwinia_amylovora_LA636	53.59	1	incomplete	8.5	46.08	CBVT0100000061_amylovora_LA636_WGS_project_CBVT000000000_data	968321-976837
GCA_000513395.1	Erwinia_amylovora_LA636	53.59	2	incomplete	23.2	53.48	CBVT0100000071_amylovora_LA636_WGS_project_CBVT000000000_data	531722-554979
GCA_000513355.1	Erwinia_amylovora_LA637	53.72	3	incomplete	13	45.37	CBVU0100000071_amylovora_LA637_WGS_project_CBVU000000000_data	601568-614628
GCA_000513355.1	Erwinia_amylovora_LA637	53.72	1	incomplete	8.5	46.08	CBVU0100000061_amylovora_LA637_WGS_project_CBVU000000000_data	968328-976844
GCA_000513355.1	Erwinia_amylovora_LA637	53.72	2	incomplete	23.2	53.48	CBVU0100000071_amylovora_LA637_WGS_project_CBVU000000000_data	531704-554961
GCA_002732175.1	Erwinia_amylovora_MAGFLF_2	53.55	3	incomplete	8.5	45.99	NQJN010000011_amylovora_strain_MAGFLF_2_tig00000000	1960951-1969521
GCA_002732175.1	Erwinia_amylovora_MAGFLF_2	53.55	2	incomplete	23.2	53.43	NQJN010000011_amylovora_strain_MAGFLF_2_tig00000000	479650-502906
GCA_002732175.1	Erwinia_amylovora_MAGFLF_2	53.55	1	incomplete	27.6	48.85	NQJN010000011_amylovora_strain_MAGFLF_2_tig00000000	418129-445760
GCA_002732485.1	Erwinia_amylovora_MANB02_1	53.5	3	incomplete	8.5	46.08	NQJX010000291_amylovora_strain_MANB02_1_NODE_1_length_859783_cov_595015	507126-515642
GCA_002732485.1	Erwinia_amylovora_MANB02_1	53.5	1	incomplete	27.6	48.85	NQJX010000361_amylovora_strain_MANB02_1_NODE_10_length_153552_cov_680667	20853-48489
GCA_002732485.1	Erwinia_amylovora_MANB02_1	53.5	2	incomplete	23.2	53.43	NQJX010000361_amylovora_strain_MANB02_1_NODE_10_length_153552_cov_680667	82380-105636
GCA_002732135.1	Erwinia_amylovora_MASHBO	53.68	3	incomplete	23.2	53.48	NQJK010000071_amylovora_strain_MASHBO_tig00000008	275000-298251
GCA_002732135.1	Erwinia_amylovora_MASHBO	53.68	1	incomplete	10.9	53.29	NQJK010000041_amylovora_strain_MASHBO_tig00000004	8746-19671
GCA_002732135.1	Erwinia_amylovora_MASHBO	53.68	4	incomplete	13	45.38	NQJK010000071_amylovora_strain_MASHBO_tig00000008	344851-357910
GCA_002732135.1	Erwinia_amylovora_MASHBO	53.68	2	incomplete	8.2	45.88	NQJK010000061_amylovora_strain_MASHBO_tig00000007	415673-423919
GCA_019967065.1	Erwinia_amylovora_MLI181_18	53.5	1	incomplete	27.6	48.84	JAIMFW0100000101_amylovora_strain_MLI181_18_NODE_10_length_151237_cov_13093907	20534-48179
GCA_019967065.1	Erwinia_amylovora_MLI181_18	53.5	2	incomplete	23.2	53.43	JAIMFW0100000101_amylovora_strain_MLI181_18_NODE_10_length_151237_cov_13093907	82070-105326
GCA_019967065.1	Erwinia_amylovora_MLI181_18	53.5	3	incomplete	8.5	46.08	JAIMFW0100000091_amylovora_strain_MLI181_18_NODE_9_length_190663_cov_10153820	130679-139195
GCA_019967055.1	Erwinia_amylovora_MLI200_18	53.57	1	incomplete	8.5	45.97	JAIMFY0100000061_amylovora_strain_MLI200_18_NODE_6_length_191539_cov_8680490	52279-60849
GCA_019967055.1	Erwinia_amylovora_MLI200_18	53.57	2	incomplete	27.6	48.85	JAIMFY0100000091_amylovora_strain_MLI200_18_NODE_9_length_151270_cov_10052787	20576-48212
GCA_019967055.1	Erwinia_amylovora_MLI200_18	53.57	3	incomplete	23.2	53.43	JAIMFY0100000091_amylovora_strain_MLI200_18_NODE_9_length_151270_cov_10052787	82103-105359
GCA_019967115.1	Erwinia_amylovora_MLI217_18	53.59	3	incomplete	8.5	45.98	JAIMFX0100000071_amylovora_strain_MLI217_18_NODE_7_length_172997_cov_12210861	51564-60134
GCA_019967115.1	Erwinia_amylovora_MLI217_18	53.59	2	incomplete	20.8	49.57	JAIMFX0100000131_amylovora_strain_MLI217_18_NODE_13_length_123503_cov_14981641	102586-123434
GCA_019967115.1	Erwinia_amylovora_MLI217_18	53.59	1	incomplete	23.2	53.48	JAIMFX0100000131_amylovora_strain_MLI217_18_NODE_13_length_123503_cov_14981641	45901-69158
GCA_019967075.1	Erwinia_amylovora_MLI90_17	53.53	2	incomplete	23.2	53.48	JAIMFV0100000121_amylovora_strain_MLI90_17_NODE_12_length_123502_cov_21988422	54335-77591
GCA_019967075.1	Erwinia_amylovora_MLI90_17	53.53	1	incomplete	20.8	49.58	JAIMFV0100000121_amylovora_strain_MLI90_17_NODE_12_length_123502_cov_21988422	59-20907
GCA_019967075.1	Erwinia_amylovora_MLI90_17	53.53	3	incomplete	8.5	46.07	JAIMFV0100000081_amylovora_strain_MLI90_17_NODE_8_length_172967_cov_16099763	112984-121500
GCA_002732245.1	Erwinia_amylovora_NHSB01_1	53.53	1	incomplete	8.5	45.98	NQJW010000031_amylovora_strain_NHSB01_1_NODE_1_length_1465873_cov_468287	488413-496983
GCA_002732245.1	Erwinia_amylovora_NHSB01_1	53.53	3	incomplete	23.2	53.47	NQJW010000061_amylovora_strain_NHSB01_1_NODE_9_length_125557_cov_530381	54385-77641
GCA_002732245.1	Erwinia_amylovora_NHSB01_1	53.53	2	incomplete	20.8	49.58	NQJW010000061_amylovora_strain_NHSB01_1_NODE_9_length_125557_cov_530381	109-20957
GCA_002732435.1	Erwinia_amylovora_NHWL02_2	53.5	2	incomplete	27.6	48.85	NQJV010000101_amylovora_strain_NHWL02_2_NODE_9_length_153625_cov_648098	20926-48562
GCA_002732435.1	Erwinia_amylovora_NHWL02_2	53.5	3	incomplete	23.2	53.43	NQJV010000101_amylovora_strain_NHWL02_2_NODE_9_length_153625_cov_648098	82453-105709
GCA_002732435.1	Erwinia_amylovora_NHWL02_2	53.5	1	incomplete	8.5	45.99	NQJV010000281_amylovora_strain_NHWL02_2_NODE_1_length_1320864_cov_556943	344265-352835
GCA_002732445.1	Erwinia_amylovora_OR1	53.49	3	incomplete	23.2	53.47	NQJU010000451_amylovora_strain_OR1_NODE_8_length_153603_cov_540383	82432-105688
GCA_002732445.1	Erwinia_amylovora_OR1	53.49	1	incomplete	8.5	46.06	NQJU010000321_amylovora_strain_OR1_NODE_1_length_1666301_cov_487265	968161-976677
GCA_002732445.1	Erwinia_amylovora_OR1	53.49	2	incomplete	15.2	46.03	NQJU010000451_amylovora_strain_OR1_NODE_8_length_153603_cov_540383	20399-35642
GCA_002732425.1	Erwinia_amylovora_OR6	53.57	2	incomplete	15.2	46.03	NQJT010000451_amylovora_strain_OR6_NODE_8_length_153602_cov_664118	20399-35641
GCA_002732425.1	Erwinia_amylovora_OR6	53.57	3	incomplete	23.2	53.47	NQJT010000451_amylovora_strain_OR6_NODE_8_length_153602_cov_664118	82431-105687
GCA_002732425.1	Erwinia_amylovora_OR6	53.57	1	incomplete	8.5	46.07	NQJT010000111_amylovora_strain_OR6_NODE_1_length_1654938_cov_593665	968384-976900
GCA_012366995.1	Erwinia_amylovora_O_RG_21	53.52	2	incomplete	20.8	49.58	JAAEUL0100000051_amylovora_strain_O_RG_21_Ea_O_RG_21_contig_5	102528-123376
GCA_012366995.1	Erwinia_amylovora_O_RG_21	53.52	1	incomplete	23.2	53.48	JAAEUL0100000051_amylovora_strain_O_RG_21_Ea_O_RG_21_contig_5	45844-69100
GCA_012366965.1	Erwinia_amylovora_P_C_3b	53.52	2	incomplete	17	52.87	JAAEUK0100000031_amylovora_strain_P_C_3b_Ea_P_C_3b_contig_3	55688-72698
GCA_012366965.1	Erwinia_amylovora_P_C_3b	53.52	1	incomplete	20.8	49.58	JAAEUK0100000031_amylovora_strain_P_C_3b_Ea_P_C_3b_contig_3	1-20849
GCA_002732365.1	Erwinia_amylovora_RISTBO01_2	53.6	3	incomplete	8.5	46	NQJM010000011_amylovora_strain_RISTBO01_2_tig00000000	1963499-1972068
GCA_002732365.1	Erwinia_amylovora_RISTBO01_2	53.6	2	incomplete	23.2	53.44	NQJM010000011_amylovora_strain_RISTBO01_2_tig00000000	479679-502936
GCA_002732365.1	Erwinia_amylovora_RISTBO01_2	53.6	1	incomplete	27.6	48.86	NQJM010000011_amylovora_strain_RISTBO01_2_tig00000000	418154-445788
GCA_013375015.1	Erwinia_amylovora_TS3128	53.58	1	incomplete	8.5	46.07	CP0560341_amylovora_strain_TS3128_chromosome	1897373-1905887
GCA_013375015.1	Erwinia_amylovora_TS3128	53.58	2	incomplete	13	45.37	CP0560341_amylovora_strain_TS3128_chromosome	3420612-3433672
GCA_012980825.1	Erwinia_amylovora_TS3238	53.58	1	incomplete	27.6	48.88	CP0502441_amylovora_strain_TS3238_chromosome	337045-364654
GCA_012980825.1	Erwinia_amylovora_TS3238	53.58	2	incomplete	23.2	53.48	CP0502441_amylovora_strain_TS3238_chromosome	398545-421802
GCA_012980825.1	Erwinia_amylovora_TS3238	53.58	3	incomplete	8.5	45.98	CP0502441_amylovora_strain_TS3238_chromosome	1866658-1875228
GCA_000367645.1	Erwinia_amylovora_UPN527	53.6	1	incomplete	13	45.36	CAPC010000161_amylovora_UPN527_WGS_project_CAPC00000000_data	480306-493366
GCA_000367645.1	Erwinia_amylovora_UPN527	53.6	2	incomplete	8.5	46.08	CAPC010000061_amylovora_UPN527_WGS_project_CAPC00000000_data	969022-977538
GCA_002732405.1	Erwinia_amylovora_UT5P4	53.53	1	incomplete	8.5	46.07	NQJS010000261_amylovora_strain_UT5P4_NODE_1_length_1465346_cov_477323	968825-977341
GCA_002732405.1	Erwinia_amylovora_UT5P4	53.53	3	incomplete	23.2	53.48	NQJS010000831_amylovora_strain_UT5P4_NODE_9_length_125557_cov_505281	54385-77641
GCA_002732405.1	Erwinia_amylovora_UT5P4	53.53	2	incomplete	20.8	49.58	NQJS010000831_amylovora_strain_UT5P4_NODE_9_length_125557_cov_505281	109-20957
GCA_002732255.1	Erwinia_amylovora_VTBL01_1	53.52	3	incomplete	23.2	53.48	NQJR010000261_amylovora_strain_VTBL01_1_NODE_9_length_125557_cov_638999	54385-77642
GCA_002732255.1	Erwinia_amylovora_VTBL01_1	53.52	1	incomplete	8.5	45.98	NQJR010000551_amylovora_strain_VTBL01_1_NODE_1_length_1465936_cov_57137	488597-497167
GCA_002732255.1	Erwinia_amylovora_VTBL01_1	53.52	2	incomplete	20.8	49.58	NQJR010000261_amylovora_strain_VTBL01_1_NODE_9_length_125557_cov_638999	109-20957
GCA_002732125.1	Erwinia_amylovora_VTDMSF02	53.64	2	incomplete	23.2	53.44	NQJL010000011_amylovora_strain_VTDMSF02_tig00000000	479770-503027
GCA_002732125.1	Erwinia_amylovora_VTDMSF02	53.64	3	incomplete	8.5	45.98	NQJL010000011_amylovora_strain_VTDMSF02_tig00000000	1977692-1986262
GCA_002732125.1	Erwinia_amylovora_VTDMSF02	53.64	1	incomplete	27.6	48.85	NQJL010000011_amylovora_strain_VTDMSF02_tig00000000	418243-445879
GCA_002732215.1	Erwinia_amylovora_WSDA87_73	53.53	2	incomplete	20.8	49.58	NQJQ010000591_amylovora_strain_WSDA87_73_NODE_9_length_125558_cov_356921	109-20957
GCA_002732215.1	Erwinia_amylovora_WSDA87_73	53.53	3	incomplete	23.2	53.48	NQJQ010000591_amylovora_strain_WSDA87_73_NODE_9_length_125558_cov_356921	54385-77642
GCA_002732215.1	Erwinia_amylovora_WSDA87_73	53.53	1	incomplete	8.5	45.98	NQJQ010000381_amylovora_strain_WSDA87_73_NODE_1_length_1465160_cov_329445	487786-496356
GCA_918698235.1	Erwinia_aphidicola_isolate_Bi13	56.33	5	incomplete	10.5	54.48	CAKKMT0100000311_aphidicola_isolate_Bi13_genome_assembly	2-10538
GCA_918698235.1	Erwinia_aphidicola_isolate_Bi13	56.33	6	incomplete	4.9	43.67	CAKKMT0100000341_aphidicola_isolate_Bi13_genome_assembly	460-5444
GCA_918698235.1	Erwinia_aphidicola_isolate_Bi13	56.33	1	intact	13.5	58.31	CAKKMT0100000021_aphidicola_isolate_Bi13_genome_assembly	285932-299456
GCA_918698235.1	Erwinia_aphidicola_isolate_Bi13	56.33	2	intact	57.4	52.61	CAKKMT0100000041_aphidicola_isolate_Bi13_genome_assembly	53774-111221
GCA_918698235.1	Erwinia_aphidicola_isolate_Bi13	56.33	4	incomplete	6	49.78	CAKKMT0100000281_aphidicola_isolate_Bi13_genome_assembly	11509-17516
GCA_918698235.1	Erwinia_aphidicola_isolate_Bi13	56.33	3	incomplete	10.2	53.98	CAKKMT0100000041_aphidicola_isolate_Bi13_genome_assembly	328261-338489
GCA_014773485.1	Erwinia_aphidicola_JCM_21238	56.66	3	incomplete	11.6	49.39	JACXBP0100000091_aphidicola_strain_JCM_21238_Scaffold8_1	21546-33176
GCA_014773485.1	Erwinia_aphidicola_JCM_21238	56.66	1	intact	13.5	58.34	JACXBP0100000021_aphidicola_strain_JCM_21238_Scaffold2_1	333956-347480
GCA_014773485.1	Erwinia_aphidicola_JCM_21238	56.66	2	intact	51.6	51.24	JACXBP0100000061_aphidicola_strain_JCM_21238_Scaffold6_1	311996-363675
GCA_019132875.1	Erwinia_phyllosphaerae_CMYE1	53.76	6	questionable	40.8	51.58	JAHSPF0100000091_bacterium_CMYE1_NODE_9_length_208956_cov_154378722	121932-162757
GCA_019132875.1	Erwinia_phyllosphaerae_CMYE1	53.76	5	incomplete	18.7	48.2	JAHSPF0100000081_bacterium_CMYE1_NODE_8_length_221456_cov_152726185	80009-98733
GCA_019132875.1	Erwinia_phyllosphaerae_CMYE1	53.76	2	incomplete	56.2	48.07	JAHSPF0100000031_bacterium_CMYE1_NODE_3_length_510066_cov_153348382	118656-174884
GCA_019132875.1	Erwinia_phyllosphaerae_CMYE1	53.76	3	incomplete	15.8	51.87	JAHSPF0100000031_bacterium_CMYE1_NODE_3_length_510066_cov_153348382	213422-229268
GCA_019132875.1	Erwinia_phyllosphaerae_CMYE1	53.76	4	incomplete	17.1	53.36	JAHSPF0100000081_bacterium_CMYE1_NODE_8_length_221456_cov_152726185	56756-73857
GCA_019132875.1	Erwinia_phyllosphaerae_CMYE1	53.76	1	questionable	49.4	51.72	JAHSPF0100000021_bacterium_CMYE1_NODE_2_length_513403_cov_154286296	257619-307047
GCA_000196615.1	Erwinia_billingiae_Eb661	55.04	1	intact	37.4	52.98	FP2368431_billingiae_strain_Eb661_complete_chromosome	102203-139664
GCA_000196615.1	Erwinia_billingiae_Eb661	55.04	4	intact	33.7	49.19	FP2368431_billingiae_strain_Eb661_complete_chromosome	3552551-3586339
GCA_000196615.1	Erwinia_billingiae_Eb661	55.04	7	incomplete	21.8	49.52	FP2368431_billingiae_strain_Eb661_complete_chromosome	4924727-4946598
GCA_000196615.1	Erwinia_billingiae_Eb661	55.04	3	questionable	23.8	51.51	FP2368431_billingiae_strain_Eb661_complete_chromosome	3521948-3545777
GCA_000196615.1	Erwinia_billingiae_Eb661	55.04	6	incomplete	16.1	47.95	FP2368431_billingiae_strain_Eb661_complete_chromosome	4402953-4419083
GCA_000196615.1	Erwinia_billingiae_Eb661	55.04	8	incomplete	10.8	46.46	FP2368301_billingiae_strain_Eb661_complete_plasmid_pEB170	101670-112512
GCA_000196615.1	Erwinia_billingiae_Eb661	55.04	2	questionable	35.6	53.23	FP2368431_billingiae_strain_Eb661_complete_chromosome	1245185-1280792
GCA_000196615.1	Erwinia_billingiae_Eb661	55.04	5	incomplete	15.2	52	FP2368431_billingiae_strain_Eb661_complete_chromosome	3801028-3816254
GCA_002415165.1	Erwinia_billingiae_isolate_UBA5038	55.03	1	intact	38	51.44	DICA010000131_TPA_asm__Erwinia_billingiae_isolate_UBA5038_UBA5038_contig_172	72568-110646
GCA_002415165.1	Erwinia_billingiae_isolate_UBA5038	55.03	2	incomplete	15.2	51.88	DICA010000311_TPA_asm__Erwinia_billingiae_isolate_UBA5038_UBA5038_contig_309	157007-172236
GCA_002415165.1	Erwinia_billingiae_isolate_UBA5038	55.03	3	intact	44	53.4	DICA010000401_TPA_asm__Erwinia_billingiae_isolate_UBA5038_UBA5038_contig_60	88885-132978
GCA_002415165.1	Erwinia_billingiae_isolate_UBA5038	55.03	4	intact	15.8	51.4	DICA010000191_TPA_asm__Erwinia_billingiae_isolate_UBA5038_UBA5038_contig_71	26-15898
GCA_002980095.1	Erwinia_billingiae_MYb121	55.03	3	incomplete	10.3	43.82	PCQJ010000091_billingiae_strain_MYb121_MYb121_9	65785-76168
GCA_002980095.1	Erwinia_billingiae_MYb121	55.03	2	incomplete	15.2	51.83	PCQJ010000081_billingiae_strain_MYb121_MYb121_8	26311-41536
GCA_002980095.1	Erwinia_billingiae_MYb121	55.03	1	incomplete	9.2	52.93	PCQJ010000011_billingiae_strain_MYb121_MYb121_1	649237-658442
GCA_017168115.1	Erwinia_billingiae_PBb	54.77	5	intact	30.8	50.15	MQSZ010000041_billingiae_strain_PBb_Scaffold4	267543-298376
GCA_017168115.1	Erwinia_billingiae_PBb	54.77	1	intact	43.7	50.95	MQSZ010000011_billingiae_strain_PBb_Scaffold1	207046-250813
GCA_017168115.1	Erwinia_billingiae_PBb	54.77	2	incomplete	21.3	49.52	MQSZ010000101_billingiae_strain_PBb_Scaffold10	72687-94072
GCA_017168115.1	Erwinia_billingiae_PBb	54.77	6	incomplete	25.3	50.02	MQSZ010000041_billingiae_strain_PBb_Scaffold4	299470-324835
GCA_017168115.1	Erwinia_billingiae_PBb	54.77	4	incomplete	33.9	51.43	MQSZ010000041_billingiae_strain_PBb_Scaffold4	22302-56281
GCA_017168115.1	Erwinia_billingiae_PBb	54.77	3	incomplete	38.2	53.6	MQSZ010000031_billingiae_strain_PBb_Scaffold3	469724-507982
GCA_008728215.1	Erwinia_billingiae_TH88	55.03	5	incomplete	14.3	55.72	CP0316951_billingiae_strain_TH88_chromosome	4183663-4198020
GCA_008728215.1	Erwinia_billingiae_TH88	55.03	1	incomplete	24.1	50.06	CP0316951_billingiae_strain_TH88_chromosome	1159384-1183506
GCA_008728215.1	Erwinia_billingiae_TH88	55.03	2	intact	44.9	49.48	CP0316951_billingiae_strain_TH88_chromosome	2150885-2195835
GCA_008728215.1	Erwinia_billingiae_TH88	55.03	4	incomplete	37.2	52.53	CP0316951_billingiae_strain_TH88_chromosome	3574923-3612200
GCA_008728215.1	Erwinia_billingiae_TH88	55.03	3	incomplete	8.3	52.53	CP0316951_billingiae_strain_TH88_chromosome	2969115-2977485
GCA_003058285.2	Erwinia_dacicola_Oroville	52.6	1	incomplete	5.2	50.27	LJAM020001291_Erwinia_dacicola_strain_Oroville_edaccontig123_1	99-5300
GCA_003058285.2	Erwinia_dacicola_Oroville	52.6	7	intact	34.7	48.99	LJAM020000071_Erwinia_dacicola_strain_Oroville_edaccontig3_1	2-34715
GCA_003058285.2	Erwinia_dacicola_Oroville	52.6	3	incomplete	14.3	56.48	LJAM020000231_Erwinia_dacicola_strain_Oroville_edaccontig19_1	408-14733
GCA_003058285.2	Erwinia_dacicola_Oroville	52.6	10	intact	20.1	57.59	LJAM020000091_Erwinia_dacicola_strain_Oroville_edaccontig5_1	1805-21970
GCA_003058285.2	Erwinia_dacicola_Oroville	52.6	4	questionable	38.2	53.4	LJAM020000051_Erwinia_dacicola_strain_Oroville_edaccontig1_1	426-38658
GCA_003058285.2	Erwinia_dacicola_Oroville	52.6	12	questionable	18.2	50.99	LJAM020000131_Erwinia_dacicola_strain_Oroville_edaccontig9_1	1-18207
GCA_003058285.2	Erwinia_dacicola_Oroville	52.6	8	incomplete	8.4	50.5	LJAM020000481_Erwinia_dacicola_strain_Oroville_edaccontig43_1	22-8503
GCA_003058285.2	Erwinia_dacicola_Oroville	52.6	5	incomplete	2.5	44.93	LJAM020002811_Erwinia_dacicola_strain_Oroville_edaccontig273_1	125-2657
GCA_003058285.2	Erwinia_dacicola_Oroville	52.6	6	intact	36	50.94	LJAM020000061_Erwinia_dacicola_strain_Oroville_edaccontig2_1	166-36228
GCA_003058285.2	Erwinia_dacicola_Oroville	52.6	11	questionable	21	53.78	LJAM020000111_Erwinia_dacicola_strain_Oroville_edaccontig7_1	138-21218
GCA_003058285.2	Erwinia_dacicola_Oroville	52.6	2	incomplete	4.5	48.93	LJAM020001511_Erwinia_dacicola_strain_Oroville_edaccontig145_1	66-4637
GCA_003058285.2	Erwinia_dacicola_Oroville	52.6	9	incomplete	20.5	53.36	LJAM020000081_Erwinia_dacicola_strain_Oroville_edaccontig4_1	2498-23018
GCA_009295515.1	Erwinia_endophytica_A41C3	51.59	4	incomplete	24.8	48.28	RQVV010000241_endophytica_strain_A41C3_Seq24	150003-174855
GCA_009295515.1	Erwinia_endophytica_A41C3	51.59	9	incomplete	4.1	54.12	RQVV010000571_endophytica_strain_A41C3_Seq58	585-4778
GCA_009295515.1	Erwinia_endophytica_A41C3	51.59	10	incomplete	16.7	45.81	RQVV010000611_endophytica_strain_A41C3_Seq62	1285-18065
GCA_009295515.1	Erwinia_endophytica_A41C3	51.59	1	incomplete	4.8	42.61	RQVV010000011_endophytica_strain_A41C3_Seq1	30574-35405
GCA_009295515.1	Erwinia_endophytica_A41C3	51.59	3	incomplete	4.9	50.97	RQVV010000131_endophytica_strain_A41C3_Seq13	539-5504
GCA_009295515.1	Erwinia_endophytica_A41C3	51.59	7	intact	17.8	51.88	RQVV010000531_endophytica_strain_A41C3_Seq54	730-18569
GCA_009295515.1	Erwinia_endophytica_A41C3	51.59	6	incomplete	26.6	49.98	RQVV010000401_endophytica_strain_A41C3_Seq41	12-26703
GCA_009295515.1	Erwinia_endophytica_A41C3	51.59	2	intact	49.8	48.4	RQVV010000121_endophytica_strain_A41C3_Seq12	391-50266
GCA_009295515.1	Erwinia_endophytica_A41C3	51.59	8	incomplete	8.4	42.26	RQVV010000531_endophytica_strain_A41C3_Seq54	151937-160363
GCA_009295515.1	Erwinia_endophytica_A41C3	51.59	5	incomplete	9.3	48.44	RQVV010000241_endophytica_strain_A41C3_Seq24	169235-178604
GCA_001756855.1	Erwinia_dacicola_IL	52.82	4	questionable	40.3	49.1	MAYS010001421_Erwinia_dacicola_strain_IL_contig_226	3-40376
GCA_001756855.1	Erwinia_dacicola_IL	52.82	5	incomplete	25.8	56.13	MAYS010001791_Erwinia_dacicola_strain_IL_contig_26	410-26212
GCA_001756855.1	Erwinia_dacicola_IL	52.82	8	incomplete	5.8	52.19	MAYS010002961_Erwinia_dacicola_strain_IL_contig_365	8-5830
GCA_001756855.1	Erwinia_dacicola_IL	52.82	7	incomplete	7.3	46.31	MAYS010002171_Erwinia_dacicola_strain_IL_contig_294	49-7368
GCA_001756855.1	Erwinia_dacicola_IL	52.82	9	questionable	21	53.78	MAYS010003081_Erwinia_dacicola_strain_IL_contig_376	90-21169
GCA_001756855.1	Erwinia_dacicola_IL	52.82	3	incomplete	9.3	47.97	MAYS010001341_Erwinia_dacicola_strain_IL_contig_219	2183-11553
GCA_001756855.1	Erwinia_dacicola_IL	52.82	10	incomplete	4.3	51.59	MAYS010003101_Erwinia_dacicola_strain_IL_contig_378	500-4804
GCA_001756855.1	Erwinia_dacicola_IL	52.82	12	incomplete	2.5	44.93	MAYS010004011_Erwinia_dacicola_strain_IL_contig_46	402-2934
GCA_001756855.1	Erwinia_dacicola_IL	52.82	6	incomplete	5.3	48.37	MAYS010001951_Erwinia_dacicola_strain_IL_contig_274	80-5411
GCA_001756855.1	Erwinia_dacicola_IL	52.82	13	questionable	4	52.86	MAYS010006001_Erwinia_dacicola_strain_IL_contig_91	2-4057
GCA_001756855.1	Erwinia_dacicola_IL	52.82	2	questionable	35.8	54.31	MAYS010001081_Erwinia_dacicola_strain_IL_contig_196	38-35858
GCA_001756855.1	Erwinia_dacicola_IL	52.82	14	incomplete	10.1	52.23	MAYS010006011_Erwinia_dacicola_strain_IL_contig_92	1-10152
GCA_001756855.1	Erwinia_dacicola_IL	52.82	1	incomplete	4.8	53.7	MAYS010000441_Erwinia_dacicola_strain_IL_contig_138	3-4825
GCA_001756855.1	Erwinia_dacicola_IL	52.82	11	incomplete	23.4	53.07	MAYS010003341_Erwinia_dacicola_strain_IL_contig_4	1-23416
GCA_020342335.1	Erwinia_gerundensis_AR	55.24	1	incomplete	11.7	52.18	CP0732621_gerundensis_strain_AR_chromosome	825419-837118
GCA_020342335.1	Erwinia_gerundensis_AR	55.24	2	incomplete	8.7	48.91	CP0732621_gerundensis_strain_AR_chromosome	1375920-1384692
GCA_014354255.1	Erwinia_gerundensis_Eg13_2	55.35	2	incomplete	12.8	46.97	JACSXP0100000031_gerundensis_strain_Eg13_2_contig_3	201160-214047
GCA_014354255.1	Erwinia_gerundensis_Eg13_2	55.35	1	incomplete	32.2	52.01	JACSXP0100000021_gerundensis_strain_Eg13_2_contig_2	29585-61827
GCA_014354275.1	Erwinia_gerundensis_Eg13_3	55.25	2	incomplete	12.8	46.97	JACSXO0100000041_gerundensis_strain_Eg13_3_contig_4	265234-278121
GCA_014354275.1	Erwinia_gerundensis_Eg13_3	55.25	1	incomplete	32.2	52.02	JACSXO0100000031_gerundensis_strain_Eg13_3_contig_3	448554-480785
GCA_014354075.1	Erwinia_gerundensis_Eg31_2	55.23	2	incomplete	6	49.7	JACSXG0100000381_gerundensis_strain_Eg31_2_contig_38	4247-10322
GCA_014354075.1	Erwinia_gerundensis_Eg31_2	55.23	1	intact	62.5	50	JACSXG0100000101_gerundensis_strain_Eg31_2_contig_10	20669-83194
GCA_014354075.1	Erwinia_gerundensis_Eg31_2	55.23	3	questionable	39.5	51	JACSXG0100000041_gerundensis_strain_Eg31_2_contig_4	8895-48435
GCA_014354075.1	Erwinia_gerundensis_Eg31_2	55.23	4	intact	84.6	52.74	JACSXG0100000071_gerundensis_strain_Eg31_2_contig_7	114672-199313
GCA_014354075.1	Erwinia_gerundensis_Eg31_2	55.23	5	incomplete	32.2	52	JACSXG0100000081_gerundensis_strain_Eg31_2_contig_8	29585-61829
GCA_014353715.1	Erwinia_gerundensis_Eg31_5	55.18	3	incomplete	6.9	54.84	JACSXD0100000291_gerundensis_strain_Eg31_5_contig_29	6261-13206
GCA_014353715.1	Erwinia_gerundensis_Eg31_5	55.18	2	incomplete	18.6	45.49	JACSXD0100000121_gerundensis_strain_Eg31_5_contig_12	83214-101861
GCA_014353715.1	Erwinia_gerundensis_Eg31_5	55.18	1	incomplete	15.1	50.33	JACSXD0100000011_gerundensis_strain_Eg31_5_contig_1	39447-54610
GCA_017815635.1	Erwinia_gerundensis_isolate_A4	55.32	1	incomplete	11.7	52.19	CP0725981_gerundensis_isolate_A4_chromosome	877352-889051
GCA_017815635.1	Erwinia_gerundensis_isolate_A4	55.32	2	incomplete	19.7	50.85	CP0725981_gerundensis_isolate_A4_chromosome	1530937-1550714
GCA_001267535.1	Erwinia_iniecta_B120	52.76	2	incomplete	27	52.52	JRXE010000261_iniecta_strain_B120_contig000026	52864-79880
GCA_001267535.1	Erwinia_iniecta_B120	52.76	1	incomplete	8	46.37	JRXE010000191_iniecta_strain_B120_contig000019	9409-17506
GCA_001267545.1	Erwinia_iniecta_B149	52.68	1	incomplete	8	46.37	JRXF010000191_iniecta_strain_B149_149_k65_000019	8103-16200
GCA_001267545.1	Erwinia_iniecta_B149	52.68	2	incomplete	27	52.52	JRXF010000261_iniecta_strain_B149_149_k65_000026	95-27099
GCA_000590885.1	Erwinia_mallotivora_BT_MARDI	52.43	1	incomplete	14.9	51.92	JFHN010000231_mallotivora_strain_BT_MARDI_contig_23	32041-46964
GCA_000590885.1	Erwinia_mallotivora_BT_MARDI	52.43	3	incomplete	17.2	52.86	JFHN010000631_mallotivora_strain_BT_MARDI_contig_63	159077-176284
GCA_000590885.1	Erwinia_mallotivora_BT_MARDI	52.43	2	incomplete	20.3	50.82	JFHN010000411_mallotivora_strain_BT_MARDI_contig_41	1-20361
GCA_000770305.1	Erwinia_oleae_DAPP_PG531	54.73	2	intact	14.7	48.55	JNVB010000341_oleae_strain_DAPP_PG531_contig34	2-14772
GCA_000770305.1	Erwinia_oleae_DAPP_PG531	54.73	1	incomplete	25.1	52.91	JNVB010000301_oleae_strain_DAPP_PG531_contig30	21716-46867
GCA_003485445.1	Erwinia_persicina_B64	55.17	4	incomplete	10	40.46	CP0227251_persicina_strain_B64_chromosome	2565475-2575494
GCA_003485445.1	Erwinia_persicina_B64	55.17	5	intact	16.7	57.18	CP0227251_persicina_strain_B64_chromosome	3306924-3323721
GCA_003485445.1	Erwinia_persicina_B64	55.17	2	intact	49.5	50.37	CP0227251_persicina_strain_B64_chromosome	546851-596380
GCA_003485445.1	Erwinia_persicina_B64	55.17	1	incomplete	11.1	53.2	CP0227251_persicina_strain_B64_chromosome	265462-276645
GCA_003485445.1	Erwinia_persicina_B64	55.17	3	incomplete	11.7	46.69	CP0227251_persicina_strain_B64_chromosome	1446987-1458768
GCA_005233475.1	Erwinia_persicina_CFBP1351100_0	55.1	7	incomplete	11.4	43.03	QGAC010000101_persicina_strain_CFBP13511_contig_100_9	470-11960
GCA_005233475.1	Erwinia_persicina_CFBP1351100_0	55.1	2	incomplete	20.4	49.6	QGAC010000021_persicina_strain_CFBP13511_contig_100_1	167805-188247
GCA_005233475.1	Erwinia_persicina_CFBP1351100_0	55.1	5	questionable	13.6	51.42	QGAC010000041_persicina_strain_CFBP13511_contig_100_3	17265-30937
GCA_005233475.1	Erwinia_persicina_CFBP1351100_0	55.1	1	intact	43.5	50.7	QGAC010000011_persicina_strain_CFBP13511_contig_100_0	165-43686
GCA_005233475.1	Erwinia_persicina_CFBP1351100_0	55.1	3	incomplete	17	51.32	QGAC010000031_persicina_strain_CFBP13511_contig_100_2	187116-204200
GCA_005233475.1	Erwinia_persicina_CFBP1351100_0	55.1	4	questionable	14.2	41.62	QGAC010000251_persicina_strain_CFBP13511_contig_100_25	756-14993
GCA_005233475.1	Erwinia_persicina_CFBP1351100_0	55.1	6	intact	16.8	57.18	QGAC010000081_persicina_strain_CFBP13511_contig_100_7	75559-92358
GCA_014839305.1	Erwinia_persicina_CFBP13732_CFBP13732001	55.1	1	intact	16.8	57.18	JACYNN0100000031_persicina_strain_CFBP13732_CFBP13732003	290696-307495
GCA_014839305.1	Erwinia_persicina_CFBP13732_CFBP13732001	55.1	4	incomplete	7.9	48.37	JACYNN0100000331_persicina_strain_CFBP13732_CFBP13732033	18651-26636
GCA_014839305.1	Erwinia_persicina_CFBP13732_CFBP13732001	55.1	3	questionable	13.6	51.43	JACYNN0100000211_persicina_strain_CFBP13732_CFBP13732021	21651-35323
GCA_014839305.1	Erwinia_persicina_CFBP13732_CFBP13732001	55.1	2	incomplete	11.5	49.84	JACYNN0100000051_persicina_strain_CFBP13732_CFBP13732005	24031-35583
GCA_014839215.1	Erwinia_persicina_CFBP8767_CFBP8767001	55.1	2	incomplete	11.5	49.84	JACYNM0100000051_persicina_strain_CFBP8767_CFBP8767005	24031-35583
GCA_014839215.1	Erwinia_persicina_CFBP8767_CFBP8767001	55.1	1	intact	16.8	57.18	JACYNM0100000021_persicina_strain_CFBP8767_CFBP8767002	127796-144595
GCA_014839215.1	Erwinia_persicina_CFBP8767_CFBP8767001	55.1	4	incomplete	7.9	48.37	JACYNM0100000341_persicina_strain_CFBP8767_CFBP8767034	18651-26636
GCA_014839215.1	Erwinia_persicina_CFBP8767_CFBP8767001	55.1	3	questionable	13.6	51.43	JACYNM0100000221_persicina_strain_CFBP8767_CFBP8767022	21651-35323
GCA_014838835.1	Erwinia_persicina_CFBP8795_CFBP879501	55.34	10	intact	45.9	53.84	JACYMQ0100000111_persicina_strain_CFBP8795_CFBP879511	27754-73675
GCA_014838835.1	Erwinia_persicina_CFBP8795_CFBP879501	55.34	5	intact	34.3	53.55	JACYMQ0100000051_persicina_strain_CFBP8795_CFBP879505	206690-241017
GCA_014838835.1	Erwinia_persicina_CFBP8795_CFBP879501	55.34	1	incomplete	25.9	55.9	JACYMQ0100000011_persicina_strain_CFBP8795_CFBP879501	753-26703
GCA_014838835.1	Erwinia_persicina_CFBP8795_CFBP879501	55.34	6	incomplete	22	54.11	JACYMQ0100000051_persicina_strain_CFBP8795_CFBP879505	235219-257289
GCA_014838835.1	Erwinia_persicina_CFBP8795_CFBP879501	55.34	8	incomplete	11.3	49.67	JACYMQ0100000091_persicina_strain_CFBP8795_CFBP879509	137003-148317
GCA_014838835.1	Erwinia_persicina_CFBP8795_CFBP879501	55.34	2	questionable	12	52.86	JACYMQ0100000011_persicina_strain_CFBP8795_CFBP879501	422891-434919
GCA_014838835.1	Erwinia_persicina_CFBP8795_CFBP879501	55.34	11	incomplete	18.1	56.24	JACYMQ0100000231_persicina_strain_CFBP8795_CFBP879523	2485-20682
GCA_014838835.1	Erwinia_persicina_CFBP8795_CFBP879501	55.34	7	incomplete	27.3	52.35	JACYMQ0100000051_persicina_strain_CFBP8795_CFBP879505	248669-276036
GCA_014838835.1	Erwinia_persicina_CFBP8795_CFBP879501	55.34	3	questionable	15.7	50.22	JACYMQ0100000031_persicina_strain_CFBP8795_CFBP879503	6471-22265
GCA_014838835.1	Erwinia_persicina_CFBP8795_CFBP879501	55.34	4	intact	16.8	57.24	JACYMQ0100000041_persicina_strain_CFBP8795_CFBP879504	139477-156346
GCA_014838835.1	Erwinia_persicina_CFBP8795_CFBP879501	55.34	9	incomplete	9.9	54.24	JACYMQ0100000101_persicina_strain_CFBP8795_CFBP879510	143521-153445
GCA_014838825.1	Erwinia_persicina_CFBP8797_CFBP879701	56.04	2	incomplete	16.2	49.47	JACYMO0100000061_persicina_strain_CFBP8797_CFBP879706	30903-47177
GCA_014838825.1	Erwinia_persicina_CFBP8797_CFBP879701	56.04	1	intact	16.8	57.35	JACYMO0100000041_persicina_strain_CFBP8797_CFBP879704	289330-306129
GCA_014839105.1	Erwinia_persicina_CFBP8803_CFBP880301	55.97	2	incomplete	15.9	48.95	JACYND0100000041_persicina_strain_CFBP8803_CFBP880304	445806-461757
GCA_014839105.1	Erwinia_persicina_CFBP8803_CFBP880301	55.97	3	incomplete	15.4	49.97	JACYND0100000071_persicina_strain_CFBP8803_CFBP880307	230370-245866
GCA_014839105.1	Erwinia_persicina_CFBP8803_CFBP880301	55.97	4	incomplete	29.7	50.84	JACYND0100000161_persicina_strain_CFBP8803_CFBP880316	48759-78510
GCA_014839105.1	Erwinia_persicina_CFBP8803_CFBP880301	55.97	1	intact	19	55.53	JACYND0100000021_persicina_strain_CFBP8803_CFBP880302	328716-347746
GCA_019844095.1	Erwinia_persicina_Cp2	55.53	4	intact	35	52.46	CP0821411_persicina_strain_Cp2_chromosome	2122517-2157589
GCA_019844095.1	Erwinia_persicina_Cp2	55.53	1	intact	27	46.8	CP0821411_persicina_strain_Cp2_chromosome	562241-589300
GCA_019844095.1	Erwinia_persicina_Cp2	55.53	2	incomplete	7.8	48.11	CP0821411_persicina_strain_Cp2_chromosome	1098467-1106327
GCA_019844095.1	Erwinia_persicina_Cp2	55.53	3	incomplete	29.7	51.37	CP0821411_persicina_strain_Cp2_chromosome	1095070-1124837
GCA_019844095.1	Erwinia_persicina_Cp2	55.53	6	intact	16.8	57.27	CP0821411_persicina_strain_Cp2_chromosome	3974277-3991146
GCA_019844095.1	Erwinia_persicina_Cp2	55.53	5	questionable	12	52.84	CP0821411_persicina_strain_Cp2_chromosome	2866627-2878665
GCA_014357465.1	Erwinia_persicina_DOAB1061_DOAB1061	55.29	3	intact	16.9	56.49	JACONS0100000021_persicina_strain_DOAB1061_DOAB1061_contig_2	290348-307316
GCA_014357465.1	Erwinia_persicina_DOAB1061_DOAB1061	55.29	5	incomplete	26	51.22	JACONS0100000061_persicina_strain_DOAB1061_DOAB1061_contig_6	205808-231858
GCA_014357465.1	Erwinia_persicina_DOAB1061_DOAB1061	55.29	2	incomplete	17.7	50.75	JACONS0100000121_persicina_strain_DOAB1061_DOAB1061_contig_12	51989-69774
GCA_014357465.1	Erwinia_persicina_DOAB1061_DOAB1061	55.29	4	intact	38.8	49.88	JACONS0100000041_persicina_strain_DOAB1061_DOAB1061_contig_4	426638-465444
GCA_014357465.1	Erwinia_persicina_DOAB1061_DOAB1061	55.29	1	intact	37.7	53.03	JACONS0100000011_persicina_strain_DOAB1061_DOAB1061_contig_1	82854-120567
GCA_001571305.1	Erwinia_persicina_NBRC_102418_DNA	55.41	2	intact	16.8	57.2	BCTN010000101_persicina_NBRC_102418_DNA	35379-52249
GCA_001571305.1	Erwinia_persicina_NBRC_102418_DNA	55.41	1	incomplete	18.1	47.61	BCTN010000071_persicina_NBRC_102418_DNA	79396-97525
GCA_001571305.1	Erwinia_persicina_NBRC_102418_DNA	55.41	4	intact	45.7	49.41	BCTN010000271_persicina_NBRC_102418_DNA	214-45988
GCA_001571305.1	Erwinia_persicina_NBRC_102418_DNA	55.41	3	incomplete	12.2	51.97	BCTN010000231_persicina_NBRC_102418_DNA	16173-28377
GCA_001050515.1	Erwinia_piriflorinigrans_CFBP_5888	52.91	2	incomplete	13	53.06	CAHS010000161_piriflorinigrans_CFBP_5888_WGS_project_CAHS00000000_data	119388-132479
GCA_001050515.1	Erwinia_piriflorinigrans_CFBP_5888	52.91	1	incomplete	10.1	52.1	CAHS010000061_piriflorinigrans_CFBP_5888_WGS_project_CAHS00000000_data	21343-31479
GCA_001050515.1	Erwinia_piriflorinigrans_CFBP_5888	52.91	3	intact	39	52.86	CAHS010000211_piriflorinigrans_CFBP_5888_WGS_project_CAHS00000000_data	49830-88897
GCA_003846135.1	Erwinia_psidii_IBSBF_435	51.48	2	intact	36.2	53.57	RHHM010000131_psidii_strain_IBSBF_435_scaffold_13	80460-116754
GCA_003846135.1	Erwinia_psidii_IBSBF_435	51.48	5	intact	31.1	53.97	RHHM010000031_psidii_strain_IBSBF_435_scaffold_3	65293-96457
GCA_003846135.1	Erwinia_psidii_IBSBF_435	51.48	1	incomplete	18.7	50.1	RHHM010000101_psidii_strain_IBSBF_435_scaffold_10	89351-108112
GCA_003846135.1	Erwinia_psidii_IBSBF_435	51.48	4	intact	42	51.5	RHHM010000161_psidii_strain_IBSBF_435_scaffold_16	3655-45725
GCA_003846135.1	Erwinia_psidii_IBSBF_435	51.48	7	incomplete	7.7	52	RHHM010000071_psidii_strain_IBSBF_435_scaffold_7	237586-245348
GCA_003846135.1	Erwinia_psidii_IBSBF_435	51.48	6	incomplete	7.8	51.42	RHHM010000061_psidii_strain_IBSBF_435_scaffold_6	238745-246571
GCA_003846135.1	Erwinia_psidii_IBSBF_435	51.48	3	incomplete	18.7	48.84	RHHM010000141_psidii_strain_IBSBF_435_scaffold_14	98877-117617
GCA_000026985.1	Erwinia_pyrifoliae_DSM_12163	53.37	5	intact	45.2	51.39	FN3922351_pyrifoliae_DSM_12163_complete_genome	2281145-2326440
GCA_000026985.1	Erwinia_pyrifoliae_DSM_12163	53.37	2	incomplete	9.8	52.97	FN3922351_pyrifoliae_DSM_12163_complete_genome	1059308-1069187
GCA_000026985.1	Erwinia_pyrifoliae_DSM_12163	53.37	4	incomplete	28.2	49.49	FN3922351_pyrifoliae_DSM_12163_complete_genome	1977987-2006212
GCA_000026985.1	Erwinia_pyrifoliae_DSM_12163	53.37	6	incomplete	23.1	56.88	FN3922351_pyrifoliae_DSM_12163_complete_genome	3201176-3224293
GCA_000026985.1	Erwinia_pyrifoliae_DSM_12163	53.37	3	incomplete	12.8	53.61	FN3922351_pyrifoliae_DSM_12163_complete_genome	1130588-1143468
GCA_000026985.1	Erwinia_pyrifoliae_DSM_12163	53.37	1	incomplete	8.2	50.61	FN3922351_pyrifoliae_DSM_12163_complete_genome	685560-693786
GCA_000026985.1	Erwinia_pyrifoliae_DSM_12163	53.37	7	intact	11.6	47.79	FN3922351_pyrifoliae_DSM_12163_complete_genome	3494261-3505947
GCA_000027265.1	Erwinia_pyrifoliae_Ep1_96	53.38	4	incomplete	28.2	49.5	FP2368421_pyrifoliae_strain_Ep1_96_complete_chromosome	1977936-2006160
GCA_000027265.1	Erwinia_pyrifoliae_Ep1_96	53.38	3	incomplete	12.8	53.61	FP2368421_pyrifoliae_strain_Ep1_96_complete_chromosome	1130555-1143436
GCA_000027265.1	Erwinia_pyrifoliae_Ep1_96	53.38	6	incomplete	23.1	56.94	FP2368421_pyrifoliae_strain_Ep1_96_complete_chromosome	3201251-3224368
GCA_000027265.1	Erwinia_pyrifoliae_Ep1_96	53.38	1	incomplete	8.2	50.61	FP2368421_pyrifoliae_strain_Ep1_96_complete_chromosome	685538-693764
GCA_000027265.1	Erwinia_pyrifoliae_Ep1_96	53.38	5	intact	45.2	51.39	FP2368421_pyrifoliae_strain_Ep1_96_complete_chromosome	2281094-2326387
GCA_000027265.1	Erwinia_pyrifoliae_Ep1_96	53.38	7	intact	11.6	47.94	FP2368421_pyrifoliae_strain_Ep1_96_complete_chromosome	3494327-3506010
GCA_000027265.1	Erwinia_pyrifoliae_Ep1_96	53.38	2	incomplete	9.8	52.97	FP2368421_pyrifoliae_strain_Ep1_96_complete_chromosome	1059276-1069155
GCA_002952315.1	Erwinia_pyrifoliae_EpK1_15	53.38	6	incomplete	9.8	52.97	CP0235671_pyrifoliae_strain_EpK1_15_chromosome	2928243-2938122
GCA_002952315.1	Erwinia_pyrifoliae_EpK1_15	53.38	2	intact	25.6	51.47	CP0235671_pyrifoliae_strain_EpK1_15_chromosome	1149860-1175538
GCA_002952315.1	Erwinia_pyrifoliae_EpK1_15	53.38	3	intact	50.5	51.51	CP0235671_pyrifoliae_strain_EpK1_15_chromosome	1656965-1707494
GCA_002952315.1	Erwinia_pyrifoliae_EpK1_15	53.38	1	incomplete	27.2	57.59	CP0235671_pyrifoliae_strain_EpK1_15_chromosome	756525-783749
GCA_002952315.1	Erwinia_pyrifoliae_EpK1_15	53.38	4	questionable	40.5	49.88	CP0235671_pyrifoliae_strain_EpK1_15_chromosome	1969220-2009720
GCA_002952315.1	Erwinia_pyrifoliae_EpK1_15	53.38	7	incomplete	8.2	50.61	CP0235671_pyrifoliae_strain_EpK1_15_chromosome	3303776-3312002
GCA_002952315.1	Erwinia_pyrifoliae_EpK1_15	53.38	5	incomplete	12.8	53.61	CP0235671_pyrifoliae_strain_EpK1_15_chromosome	2852699-2865580
GCA_020428355.1	Erwinia_pyrifoliae_YKB12328	53.42	6	incomplete	23	56.94	VOIC010000021_pyrifoliae_strain_YKB12328_contig00002_10529EPY1232	1941911-1965009
GCA_020428355.1	Erwinia_pyrifoliae_YKB12328	53.42	1	incomplete	8.2	50.61	VOIC010000011_pyrifoliae_strain_YKB12328_contig00001_10529EPY1232	1265838-1274064
GCA_020428355.1	Erwinia_pyrifoliae_YKB12328	53.42	3	incomplete	12.8	53.61	VOIC010000011_pyrifoliae_strain_YKB12328_contig00001_10529EPY1232	1712262-1725144
GCA_020428355.1	Erwinia_pyrifoliae_YKB12328	53.42	2	incomplete	9.8	52.97	VOIC010000011_pyrifoliae_strain_YKB12328_contig00001_10529EPY1232	1639720-1649599
GCA_020428355.1	Erwinia_pyrifoliae_YKB12328	53.42	4	incomplete	28.2	49.5	VOIC010000021_pyrifoliae_strain_YKB12328_contig00002_10529EPY1232	712131-740355
GCA_020428355.1	Erwinia_pyrifoliae_YKB12328	53.42	5	intact	47.7	51.4	VOIC010000021_pyrifoliae_strain_YKB12328_contig00002_10529EPY1232	1016798-1064568
GCA_004364855.1	Erwinia_rhapontici_BIGb0435_Ga0304803	54.09	3	incomplete	13.8	51.92	SOAQ010000061_rhapontici_strain_BIGb0435_Ga0304803_106	287-14156
GCA_004364855.1	Erwinia_rhapontici_BIGb0435_Ga0304803	54.09	5	intact	46.9	53.11	SOAQ010000111_rhapontici_strain_BIGb0435_Ga0304803_111	44377-91279
GCA_004364855.1	Erwinia_rhapontici_BIGb0435_Ga0304803	54.09	2	intact	18.8	54.72	SOAQ010000021_rhapontici_strain_BIGb0435_Ga0304803_102	349811-368676
GCA_004364855.1	Erwinia_rhapontici_BIGb0435_Ga0304803	54.09	1	intact	42.7	51.34	SOAQ010000011_rhapontici_strain_BIGb0435_Ga0304803_101	389016-431750
GCA_004364855.1	Erwinia_rhapontici_BIGb0435_Ga0304803	54.09	4	incomplete	13.6	50.37	SOAQ010000081_rhapontici_strain_BIGb0435_Ga0304803_108	27830-41522
GCA_020683125.1	Erwinia_rhapontici_BY21311	54.12	1	incomplete	35.5	51.67	CP0856271_rhapontici_strain_BY21311_chromosome	3783114-3818633
GCA_020683125.1	Erwinia_rhapontici_BY21311	54.12	3	intact	47.1	53.25	CP0856271_rhapontici_strain_BY21311_chromosome	4880931-4928084
GCA_020683125.1	Erwinia_rhapontici_BY21311	54.12	2	intact	16.4	55.7	CP0856271_rhapontici_strain_BY21311_chromosome	4385528-4401979
GCA_009846845.1	Erwinia_rhapontici_CGMCC16978	53.94	1	intact	47.2	52.13	WUUO010000101_rhapontici_strain_CGMCC16978_Scaffold10_1	1-47222
GCA_009846845.1	Erwinia_rhapontici_CGMCC16978	53.94	6	incomplete	29.3	51.29	WUUO010000011_rhapontici_strain_CGMCC16978_Scaffold1_1	847113-876486
GCA_009846845.1	Erwinia_rhapontici_CGMCC16978	53.94	2	intact	45.4	52.9	WUUO010000121_rhapontici_strain_CGMCC16978_Scaffold12_1	106344-151807
GCA_009846845.1	Erwinia_rhapontici_CGMCC16978	53.94	3	intact	43.2	49.72	WUUO010000191_rhapontici_strain_CGMCC16978_Scaffold19_1	1173-44375
GCA_009846845.1	Erwinia_rhapontici_CGMCC16978	53.94	5	incomplete	6.6	46.15	WUUO010000011_rhapontici_strain_CGMCC16978_Scaffold1_1	670221-676825
GCA_009846845.1	Erwinia_rhapontici_CGMCC16978	53.94	4	intact	64.8	50.13	WUUO010000011_rhapontici_strain_CGMCC16978_Scaffold1_1	99891-164770
GCA_009846845.1	Erwinia_rhapontici_CGMCC16978	53.94	8	questionable	9.5	45.76	WUUO010000041_rhapontici_strain_CGMCC16978_Scaffold4_1	279606-289158
GCA_009846845.1	Erwinia_rhapontici_CGMCC16978	53.94	7	intact	17.3	54.93	WUUO010000021_rhapontici_strain_CGMCC16978_Scaffold2_1	288734-306085
GCA_009846845.1	Erwinia_rhapontici_CGMCC16978	53.94	9	incomplete	16.5	49.33	WUUO010000041_rhapontici_strain_CGMCC16978_Scaffold4_1	330849-347374
GCA_012271765.1	Erwinia_rhapontici_H1	54.06	2	intact	38.5	49.91	VRKO010000161_rhapontici_strain_H1_Contig_1	411035-449602
GCA_012271765.1	Erwinia_rhapontici_H1	54.06	6	questionable	42.1	51.04	VRKO010000061_rhapontici_strain_H1_ref_20_len_64199	16151-58252
GCA_012271765.1	Erwinia_rhapontici_H1	54.06	3	intact	57.4	52.62	VRKO010000161_rhapontici_strain_H1_Contig_1	784012-841442
GCA_012271765.1	Erwinia_rhapontici_H1	54.06	4	intact	36.2	52.81	VRKO010000171_rhapontici_strain_H1_Contig_7	164709-200971
GCA_012271765.1	Erwinia_rhapontici_H1	54.06	5	intact	16.4	55.73	VRKO010000041_rhapontici_strain_H1_Contig_8	6738-23189
GCA_012271765.1	Erwinia_rhapontici_H1	54.06	1	intact	39.4	50.86	VRKO010000121_rhapontici_strain_H1_Connected_Contig_cla_3_1_len_197154	3643-43042
GCA_018409035.1	Erwinia_rhapontici_MAFF_311153	54.13	1	incomplete	7.7	45.4	AP0243291_rhapontici_MAFF_311153_DNA	2161156-2168922
GCA_018409035.1	Erwinia_rhapontici_MAFF_311153	54.13	3	intact	18.8	54.79	AP0243291_rhapontici_MAFF_311153_DNA	4438374-4457239
GCA_018409035.1	Erwinia_rhapontici_MAFF_311153	54.13	2	incomplete	24.1	51.38	AP0243291_rhapontici_MAFF_311153_DNA	3829024-3853142
GCA_018326325.1	Erwinia_rhapontici_MAFF_311154	54.04	3	intact	56.9	49.96	AP0243311_rhapontici_MAFF_311154_DNA	3635739-3692658
GCA_018326325.1	Erwinia_rhapontici_MAFF_311154	54.04	6	incomplete	6.4	47.27	AP0243321_rhapontici_MAFF_311154_plasmid_pERA54_DNA	107641-114137
GCA_018326325.1	Erwinia_rhapontici_MAFF_311154	54.04	1	incomplete	15.9	47.55	AP0243311_rhapontici_MAFF_311154_DNA	648036-663994
GCA_018326325.1	Erwinia_rhapontici_MAFF_311154	54.04	2	questionable	8.5	45.73	AP0243311_rhapontici_MAFF_311154_DNA	2213773-2222335
GCA_018326325.1	Erwinia_rhapontici_MAFF_311154	54.04	4	incomplete	24	52.64	AP0243311_rhapontici_MAFF_311154_DNA	3884631-3908649
GCA_018326325.1	Erwinia_rhapontici_MAFF_311154	54.04	5	intact	18.8	54.75	AP0243311_rhapontici_MAFF_311154_DNA	4499290-4518154
GCA_017875455.1	Erwinia_rhapontici_WS3235_Ga0466830	53.91	7	intact	55.4	52.42	JAGGMP0100000011_rhapontici_strain_WS3235_Ga0466830_01	5130751-5186220
GCA_017875455.1	Erwinia_rhapontici_WS3235_Ga0466830	53.91	3	intact	47.9	52.92	JAGGMP0100000011_rhapontici_strain_WS3235_Ga0466830_01	3670013-3718002
GCA_017875455.1	Erwinia_rhapontici_WS3235_Ga0466830	53.91	2	questionable	9.5	45.76	JAGGMP0100000011_rhapontici_strain_WS3235_Ga0466830_01	3383063-3392640
GCA_017875455.1	Erwinia_rhapontici_WS3235_Ga0466830	53.91	1	intact	17.3	54.93	JAGGMP0100000011_rhapontici_strain_WS3235_Ga0466830_01	550343-567694
GCA_017875455.1	Erwinia_rhapontici_WS3235_Ga0466830	53.91	4	intact	29.4	51.27	JAGGMP0100000011_rhapontici_strain_WS3235_Ga0466830_01	4165760-4195162
GCA_017875455.1	Erwinia_rhapontici_WS3235_Ga0466830	53.91	5	incomplete	6.6	46.15	JAGGMP0100000011_rhapontici_strain_WS3235_Ga0466830_01	4365450-4372054
GCA_017875455.1	Erwinia_rhapontici_WS3235_Ga0466830	53.91	8	questionable	40.2	50.23	JAGGMP0100000011_rhapontici_strain_WS3235_Ga0466830_01	5180985-5221281
GCA_017875455.1	Erwinia_rhapontici_WS3235_Ga0466830	53.91	6	intact	68.7	50.41	JAGGMP0100000011_rhapontici_strain_WS3235_Ga0466830_01	4877617-4946385
GCA_003937915.1	Erwinia_sp_198	55.59	1	incomplete	12.8	47.5	RHUM010000131_sp_198_NODE_13_length_151732_cov_534849	97551-110449
GCA_003937915.1	Erwinia_sp_198	55.59	4	incomplete	23.7	54.51	RHUM010000081_sp_198_NODE_8_length_267068_cov_511486	93018-116736
GCA_003937915.1	Erwinia_sp_198	55.59	3	incomplete	31.4	53.79	RHUM010000061_sp_198_NODE_6_length_285549_cov_506018	250919-282355
GCA_003937915.1	Erwinia_sp_198	55.59	2	intact	47.9	54.43	RHUM010000021_sp_198_NODE_2_length_526597_cov_462735	395127-443064
GCA_003937915.1	Erwinia_sp_198	55.59	5	incomplete	16.9	52.48	RHUM010000081_sp_198_NODE_8_length_267068_cov_511486	118071-135009
GCA_000745075.1	Erwinia_sp_9145_FA91DRAFT	55	3	incomplete	10.1	52.2	JQNE010000011_sp_9145_FA91DRAFT_scf7180000000004_quiver1_C	1523894-1534079
GCA_000745075.1	Erwinia_sp_9145_FA91DRAFT	55	4	incomplete	24	53.2	JQNE010000011_sp_9145_FA91DRAFT_scf7180000000004_quiver1_C	2787426-2811457
GCA_000745075.1	Erwinia_sp_9145_FA91DRAFT	55	1	intact	75.3	54.3	JQNE010000011_sp_9145_FA91DRAFT_scf7180000000004_quiver1_C	280248-355612
GCA_000745075.1	Erwinia_sp_9145_FA91DRAFT	55	2	intact	70	50.7	JQNE010000011_sp_9145_FA91DRAFT_scf7180000000004_quiver1_C	894085-964157
GCA_002865965.1	Erwinia_sp_B116	59.01	1	incomplete	7.1	57.23	JRZZ010000521_sp_B116_contig000052	10196-17333
GCA_018141005.1	Erwinia_sp_E602	58.86	3	questionable	32.3	56.01	CP0465821_sp_E602_chromosome	3098106-3130406
GCA_018141005.1	Erwinia_sp_E602	58.86	2	intact	46	57.18	CP0465821_sp_E602_chromosome	2666664-2712718
GCA_018141005.1	Erwinia_sp_E602	58.86	1	intact	56.5	57.17	CP0465821_sp_E602_chromosome	2077247-2133828
GCA_000165815.1	Erwinia_sp_Ejp617	53.65	2	intact	46.1	49.75	CP0021241_sp_Ejp617	2871404-2917601
GCA_000165815.1	Erwinia_sp_Ejp617	53.65	1	incomplete	38	53.57	CP0021241_sp_Ejp617	92551-130631
GCA_000165815.1	Erwinia_sp_Ejp617	53.65	3	incomplete	8	51.41	CP0021241_sp_Ejp617	3301983-3309984
GCA_000165815.1	Erwinia_sp_Ejp617	53.65	4	incomplete	4	49.72	CP0021241_sp_Ejp617	3791695-3795775
GCA_001517405.1	Erwinia_sp_EM595_EM595	55.28	2	intact	34.2	54.44	LN9078271_sp_EM595_genome_assembly_EM595	2197490-2231720
GCA_001517405.1	Erwinia_sp_EM595_EM595	55.28	3	incomplete	8.7	49.02	LN9078271_sp_EM595_genome_assembly_EM595	2341908-2350679
GCA_001517405.1	Erwinia_sp_EM595_EM595	55.28	1	incomplete	13.4	47.93	LN9078271_sp_EM595_genome_assembly_EM595	565530-578968
GCA_001517405.1	Erwinia_sp_EM595_EM595	55.28	4	incomplete	11.7	52.24	LN9078271_sp_EM595_genome_assembly_EM595	2898818-2910518
GCA_900068895.1	Erwinia_sp_ErVv1_Ervv1fasta	54.42	6	incomplete	19.7	51.63	CDPK010000161_sp_ErVv1_genome_assembly_Ervv1fasta	26168-45932
GCA_900068895.1	Erwinia_sp_ErVv1_Ervv1fasta	54.42	5	incomplete	13	53.21	CDPK010000161_sp_ErVv1_genome_assembly_Ervv1fasta	363-13396
GCA_900068895.1	Erwinia_sp_ErVv1_Ervv1fasta	54.42	4	incomplete	7	41.57	CDPK010000101_sp_ErVv1_genome_assembly_Ervv1fasta	84810-91859
GCA_900068895.1	Erwinia_sp_ErVv1_Ervv1fasta	54.42	7	incomplete	8.3	52.75	CDPK010000161_sp_ErVv1_genome_assembly_Ervv1fasta	40370-48723
GCA_900068895.1	Erwinia_sp_ErVv1_Ervv1fasta	54.42	1	incomplete	12.4	49.38	CDPK010000041_sp_ErVv1_genome_assembly_Ervv1fasta	53538-65962
GCA_900068895.1	Erwinia_sp_ErVv1_Ervv1fasta	54.42	3	incomplete	18.6	52.35	CDPK010000061_sp_ErVv1_genome_assembly_Ervv1fasta	54850-73541
GCA_900068895.1	Erwinia_sp_ErVv1_Ervv1fasta	54.42	2	incomplete	23.3	56.13	CDPK010000051_sp_ErVv1_genome_assembly_Ervv1fasta	89374-112673
GCA_009707715.1	Erwinia_sp_J316	53.15	1	incomplete	27.2	50.51	WLZX010000071_sp_J316_Scaffold7_1	39209-66464
GCA_009738185.1	Erwinia_sp_J780	53.16	1	incomplete	27.2	50.5	CP0465091_sp_J780_chromosome	1088921-1116175
GCA_009738185.1	Erwinia_sp_J780	53.16	2	incomplete	53.9	49.26	CP0465091_sp_J780_chromosome	1651990-1705951
GCA_013074405.1	Erwinia_sp_JH02	54.02	6	intact	48.5	50.47	JABANZ0100000031_sp_JH02_Scaffold3_1	251994-300571
GCA_013074405.1	Erwinia_sp_JH02	54.02	7	intact	17.7	54.42	JABANZ0100000051_sp_JH02_Scaffold4_1	337708-355479
GCA_013074405.1	Erwinia_sp_JH02	54.02	1	incomplete	13.6	52.49	JABANZ0100000171_sp_JH02_Scaffold15_1	49176-62815
GCA_013074405.1	Erwinia_sp_JH02	54.02	8	incomplete	17.8	49.5	JABANZ0100000081_sp_JH02_Scaffold7_1	31873-49743
GCA_013074405.1	Erwinia_sp_JH02	54.02	4	incomplete	7.7	45.06	JABANZ0100000011_sp_JH02_Scaffold1_1	879022-886786
GCA_013074405.1	Erwinia_sp_JH02	54.02	9	intact	35.9	53.02	JABANZ0100000101_sp_JH02_Scaffold9_1	55313-91286
GCA_013074405.1	Erwinia_sp_JH02	54.02	3	questionable	39.7	53.06	JABANZ0100000011_sp_JH02_Scaffold1_1	740630-780390
GCA_013074405.1	Erwinia_sp_JH02	54.02	2	questionable	17.6	51.04	JABANZ0100000011_sp_JH02_Scaffold1_1	551478-569135
GCA_013074405.1	Erwinia_sp_JH02	54.02	5	questionable	36.4	51.56	JABANZ0100000031_sp_JH02_Scaffold3_1	12391-48828
GCA_003751505.1	Erwinia_sp_JUb26_Ga0304838	56.52	2	incomplete	13.8	54.64	RJVB010000091_sp_JUb26_Ga0304838_109	213654-227550
GCA_003751505.1	Erwinia_sp_JUb26_Ga0304838	56.52	1	incomplete	22.3	53.42	RJVB010000011_sp_JUb26_Ga0304838_101	459880-482211
GCA_001422605.1	Erwinia_sp_Leaf53	59.08	5	incomplete	14.2	47.08	LMLK010000231_sp_Leaf53_contig_5	309622-323858
GCA_001422605.1	Erwinia_sp_Leaf53	59.08	1	intact	52.3	57.86	LMLK010000031_sp_Leaf53_contig_11	202951-255252
GCA_001422605.1	Erwinia_sp_Leaf53	59.08	4	incomplete	10.3	55.5	LMLK010000231_sp_Leaf53_contig_5	67276-77672
GCA_001422605.1	Erwinia_sp_Leaf53	59.08	3	intact	38.5	54.33	LMLK010000211_sp_Leaf53_contig_3	163058-201600
GCA_001422605.1	Erwinia_sp_Leaf53	59.08	6	intact	51.2	56.12	LMLK010000271_sp_Leaf53_contig_9	150342-201561
GCA_001422605.1	Erwinia_sp_Leaf53	59.08	2	intact	34.6	53.6	LMLK010000121_sp_Leaf53_contig_2	300983-335619
GCA_002752595.1	Erwinia_sp_OAMSP11	51.86	9	incomplete	7.6	48.59	MTCI010000551_sp_OAMSP11_NODE_63_length_8299_cov_927655_ID_125	657-8299
GCA_002752595.1	Erwinia_sp_OAMSP11	51.86	1	incomplete	26.6	48.89	MTCI010000051_sp_OAMSP11_NODE_12_length_104102_cov_393057_ID_23	77455-104071
GCA_002752595.1	Erwinia_sp_OAMSP11	51.86	2	incomplete	17	51.99	MTCI010000011_sp_OAMSP11_NODE_15_length_71078_cov_363488_ID_29	52826-69902
GCA_002752595.1	Erwinia_sp_OAMSP11	51.86	6	questionable	31	50.29	MTCI010000421_sp_OAMSP11_NODE_2_length_203624_cov_395475_ID_3	31933-62962
GCA_002752595.1	Erwinia_sp_OAMSP11	51.86	3	incomplete	16.5	50.6	MTCI010000031_sp_OAMSP11_NODE_16_length_70608_cov_499869_ID_31	5498-22027
GCA_002752595.1	Erwinia_sp_OAMSP11	51.86	5	incomplete	11.8	56.01	MTCI010000241_sp_OAMSP11_NODE_24_length_52233_cov_369884_ID_47	1090-12928
GCA_002752595.1	Erwinia_sp_OAMSP11	51.86	4	incomplete	20.3	49.68	MTCI010000161_sp_OAMSP11_NODE_19_length_63086_cov_441489_ID_37	42702-63055
GCA_002752595.1	Erwinia_sp_OAMSP11	51.86	7	incomplete	23.1	49.9	MTCI010000381_sp_OAMSP11_NODE_35_length_33927_cov_363034_ID_69	10735-33925
GCA_002752595.1	Erwinia_sp_OAMSP11	51.86	8	intact	23.4	49.25	MTCI010000391_sp_OAMSP11_NODE_45_length_23827_cov_972097_ID_89	27-23502
GCA_002751995.1	Erwinia_sp_OLCASP19	51.86	8	incomplete	12.2	47.25	MNKW010001121_sp_OLCASP19_NODE_59_length_13247_cov_492659_ID_117	994-13216
GCA_002751995.1	Erwinia_sp_OLCASP19	51.86	2	incomplete	16.5	50.6	MNKW010000051_sp_OLCASP19_NODE_15_length_70607_cov_34301_ID_29	5497-22026
GCA_002751995.1	Erwinia_sp_OLCASP19	51.86	5	questionable	31	50.29	MNKW010000371_sp_OLCASP19_NODE_2_length_203777_cov_262572_ID_3	32086-63115
GCA_002751995.1	Erwinia_sp_OLCASP19	51.86	1	incomplete	17	51.99	MNKW010000021_sp_OLCASP19_NODE_14_length_71078_cov_242515_ID_27	52826-69902
GCA_002751995.1	Erwinia_sp_OLCASP19	51.86	3	incomplete	20.3	49.68	MNKW010000121_sp_OLCASP19_NODE_18_length_63086_cov_297848_ID_35	32-20385
GCA_002751995.1	Erwinia_sp_OLCASP19	51.86	6	intact	32.1	48.79	MNKW010000341_sp_OLCASP19_NODE_36_length_32128_cov_270434_ID_71	1-32126
GCA_002751995.1	Erwinia_sp_OLCASP19	51.86	4	incomplete	16.8	56.16	MNKW010000311_sp_OLCASP19_NODE_25_length_52233_cov_397061_ID_49	34325-51204
GCA_002751995.1	Erwinia_sp_OLCASP19	51.86	7	incomplete	21.4	50.51	MNKW010000481_sp_OLCASP19_NODE_49_length_22054_cov_246871_ID_97	3-21485
GCA_002752165.1	Erwinia_sp_OLFS4	51.86	5	questionable	33.8	50.42	MOMB010000471_sp_OLFS4_NODE_2_length_203772_cov_543159_ID_3	137860-171743
GCA_002752165.1	Erwinia_sp_OLFS4	51.86	3	incomplete	20.3	49.68	MOMB010000561_sp_OLFS4_NODE_19_length_63148_cov_642753_ID_37	32-20385
GCA_002752165.1	Erwinia_sp_OLFS4	51.86	4	incomplete	11.8	56.01	MOMB010000611_sp_OLFS4_NODE_26_length_52233_cov_465624_ID_51	1090-12928
GCA_002752165.1	Erwinia_sp_OLFS4	51.86	2	incomplete	16.5	50.6	MOMB010000081_sp_OLFS4_NODE_17_length_70608_cov_452895_ID_33	28304-44833
GCA_002752165.1	Erwinia_sp_OLFS4	51.86	1	incomplete	18.3	51.8	MOMB010000071_sp_OLFS4_NODE_16_length_71130_cov_495321_ID_31	52826-71128
GCA_002752165.1	Erwinia_sp_OLFS4	51.86	9	incomplete	2.9	46.98	MOMB010000391_sp_OLFS4_NODE_73_length_2967_cov_141151_ID_145	3-2965
GCA_002752165.1	Erwinia_sp_OLFS4	51.86	6	incomplete	23.1	49.9	MOMB010000661_sp_OLFS4_NODE_36_length_33978_cov_532197_ID_71	10786-33976
GCA_002752165.1	Erwinia_sp_OLFS4	51.86	7	intact	32.1	48.79	MOMB010000151_sp_OLFS4_NODE_37_length_32128_cov_526231_ID_73	1-32126
GCA_002752165.1	Erwinia_sp_OLFS4	51.86	8	incomplete	12.1	47.25	MOMB010000361_sp_OLFS4_NODE_56_length_13171_cov_10146_ID_111	994-13140
GCA_002752025.1	Erwinia_sp_OLMDSP33	51.9	7	incomplete	23.1	49.9	MNKY010000311_sp_OLMDSP33_NODE_34_length_33927_cov_298747_ID_67	10735-33925
GCA_002752025.1	Erwinia_sp_OLMDSP33	51.9	1	incomplete	26.6	48.89	MNKY010000061_sp_OLMDSP33_NODE_12_length_104102_cov_325331_ID_23	77455-104071
GCA_002752025.1	Erwinia_sp_OLMDSP33	51.9	2	incomplete	17	51.99	MNKY010000011_sp_OLMDSP33_NODE_16_length_71078_cov_307154_ID_31	52826-69902
GCA_002752025.1	Erwinia_sp_OLMDSP33	51.9	5	incomplete	11.8	56.01	MNKY010000191_sp_OLMDSP33_NODE_24_length_52233_cov_321553_ID_47	1090-12928
GCA_002752025.1	Erwinia_sp_OLMDSP33	51.9	3	incomplete	16.5	50.6	MNKY010000121_sp_OLMDSP33_NODE_17_length_70608_cov_307831_ID_33	30499-47028
GCA_002752025.1	Erwinia_sp_OLMDSP33	51.9	6	questionable	31	50.29	MNKY010000421_sp_OLMDSP33_NODE_2_length_203632_cov_33572_ID_3	31942-62971
GCA_002752025.1	Erwinia_sp_OLMDSP33	51.9	4	incomplete	20.3	49.68	MNKY010000141_sp_OLMDSP33_NODE_19_length_63086_cov_360669_ID_37	42702-63055
GCA_002752015.1	Erwinia_sp_OLMTSP26	51.85	4	incomplete	11.8	56.01	MNKX010000291_sp_OLMTSP26_NODE_24_length_52233_cov_458772_ID_47	1090-12928
GCA_002752015.1	Erwinia_sp_OLMTSP26	51.85	8	incomplete	12.2	47.25	MNKX010001351_sp_OLMTSP26_NODE_58_length_13247_cov_663991_ID_115	994-13216
GCA_002752015.1	Erwinia_sp_OLMTSP26	51.85	2	incomplete	16.5	50.6	MNKX010000031_sp_OLMTSP26_NODE_16_length_70607_cov_433308_ID_31	5497-22026
GCA_002752015.1	Erwinia_sp_OLMTSP26	51.85	6	incomplete	23.1	49.9	MNKX010000371_sp_OLMTSP26_NODE_35_length_33927_cov_340912_ID_69	10735-33925
GCA_002752015.1	Erwinia_sp_OLMTSP26	51.85	1	incomplete	17	51.99	MNKX010000011_sp_OLMTSP26_NODE_15_length_71078_cov_340265_ID_29	52826-69902
GCA_002752015.1	Erwinia_sp_OLMTSP26	51.85	3	incomplete	20.3	49.68	MNKX010000141_sp_OLMTSP26_NODE_18_length_63086_cov_405225_ID_35	42702-63055
GCA_002752015.1	Erwinia_sp_OLMTSP26	51.85	5	questionable	31	50.29	MNKX010000431_sp_OLMTSP26_NODE_2_length_203635_cov_371887_ID_3	31944-62973
GCA_002752015.1	Erwinia_sp_OLMTSP26	51.85	7	intact	32.1	48.78	MNKX010000391_sp_OLMTSP26_NODE_36_length_32128_cov_377863_ID_71	1-32126
GCA_002752055.1	Erwinia_sp_OLSSP12	51.9	5	incomplete	26.6	48.89	MNCH010000081_sp_OLSSP12_NODE_8_length_104102_cov_335732_ID_15	77455-104071
GCA_002752055.1	Erwinia_sp_OLSSP12	51.9	3	incomplete	16.8	56.16	MNCH010000231_sp_OLSSP12_NODE_27_length_52233_cov_250447_ID_53	34325-51204
GCA_002752055.1	Erwinia_sp_OLSSP12	51.9	1	incomplete	17	51.99	MNCH010000141_sp_OLSSP12_NODE_17_length_71078_cov_326278_ID_33	52826-69902
GCA_002752055.1	Erwinia_sp_OLSSP12	51.9	2	incomplete	20.3	49.68	MNCH010000201_sp_OLSSP12_NODE_21_length_63086_cov_374339_ID_41	42702-63055
GCA_002752055.1	Erwinia_sp_OLSSP12	51.9	6	questionable	31	50.29	MNCH010000091_sp_OLSSP12_NODE_9_length_102207_cov_350006_ID_17	31933-62962
GCA_002752055.1	Erwinia_sp_OLSSP12	51.9	4	incomplete	23.1	49.9	MNCH010000361_sp_OLSSP12_NODE_37_length_33927_cov_329241_ID_73	10735-33925
GCA_002752075.1	Erwinia_sp_OLTSP20	51.91	6	incomplete	23.1	49.9	MOMA010000461_sp_OLTSP20_NODE_48_length_25903_cov_155461_ID_95	2711-25901
GCA_002752075.1	Erwinia_sp_OLTSP20	51.91	4	incomplete	20.3	49.68	MOMA010000191_sp_OLTSP20_NODE_19_length_63226_cov_198692_ID_37	32-20385
GCA_002752075.1	Erwinia_sp_OLTSP20	51.91	7	incomplete	26.6	48.89	MOMA010000081_sp_OLTSP20_NODE_9_length_104153_cov_168853_ID_17	77506-104122
GCA_002752075.1	Erwinia_sp_OLTSP20	51.91	3	incomplete	11.3	52.65	MOMA010000021_sp_OLTSP20_NODE_16_length_70460_cov_168414_ID_31	56620-67959
GCA_002752075.1	Erwinia_sp_OLTSP20	51.91	5	questionable	31	50.29	MOMA010000801_sp_OLTSP20_NODE_1_length_203738_cov_176487_ID_1	31997-63026
GCA_002752075.1	Erwinia_sp_OLTSP20	51.91	1	incomplete	2.9	46.98	MOMA010001101_sp_OLTSP20_NODE_101_length_2967_cov_455754_ID_201	3-2965
GCA_002752075.1	Erwinia_sp_OLTSP20	51.91	2	incomplete	18.3	51.8	MOMA010000011_sp_OLTSP20_NODE_15_length_71130_cov_16194_ID_29	52826-71128
GCA_004551645.1	Erwinia_sp_QL_Z3	55.01	3	incomplete	22.9	50.91	CP0379501_sp_QL_Z3_chromosome	1271171-1294125
GCA_004551645.1	Erwinia_sp_QL_Z3	55.01	6	questionable	12.4	45.85	CP0379491_sp_QL_Z3_plasmid_unnamed1	25776-38253
GCA_004551645.1	Erwinia_sp_QL_Z3	55.01	5	intact	32	50.36	CP0379501_sp_QL_Z3_chromosome	4871569-4903594
GCA_004551645.1	Erwinia_sp_QL_Z3	55.01	1	incomplete	15.2	51.93	CP0379501_sp_QL_Z3_chromosome	190189-205415
GCA_004551645.1	Erwinia_sp_QL_Z3	55.01	2	incomplete	16.1	45.88	CP0379501_sp_QL_Z3_chromosome	749311-765414
GCA_004551645.1	Erwinia_sp_QL_Z3	55.01	4	intact	56	49.48	CP0379501_sp_QL_Z3_chromosome	4807467-4863515
GCA_016624545.1	Erwinia_sp_S38	55.08	5	intact	38.6	52.57	JACVTS0100000021_sp_S38_NODE_2_length_464286_cov_34151555	219423-258106
GCA_016624545.1	Erwinia_sp_S38	55.08	6	intact	32.4	53.03	JACVTS0100000021_sp_S38_NODE_2_length_464286_cov_34151555	287698-320148
GCA_016624545.1	Erwinia_sp_S38	55.08	1	intact	27.3	51.32	JACVTS0100000171_sp_S38_NODE_17_length_132306_cov_37954308	1088-28466
GCA_016624545.1	Erwinia_sp_S38	55.08	10	incomplete	35.9	49.76	JACVTS0100000071_sp_S38_NODE_7_length_252999_cov_41304252	160136-196043
GCA_016624545.1	Erwinia_sp_S38	55.08	4	incomplete	12.8	48.82	JACVTS0100000281_sp_S38_NODE_28_length_82418_cov_20050954	62166-75017
GCA_016624545.1	Erwinia_sp_S38	55.08	7	incomplete	25.1	54.52	JACVTS0100000021_sp_S38_NODE_2_length_464286_cov_34151555	318193-343357
GCA_016624545.1	Erwinia_sp_S38	55.08	8	intact	39.5	49.83	JACVTS0100000301_sp_S38_NODE_30_length_58473_cov_38590702	378-39879
GCA_016624545.1	Erwinia_sp_S38	55.08	2	intact	48.1	49.92	JACVTS0100000181_sp_S38_NODE_18_length_130940_cov_33915425	79505-127634
GCA_016624545.1	Erwinia_sp_S38	55.08	9	incomplete	4.6	49.74	JACVTS0100000511_sp_S38_NODE_51_length_5411_cov_21337500	11-4612
GCA_016624545.1	Erwinia_sp_S38	55.08	3	questionable	16.1	48.33	JACVTS0100000241_sp_S38_NODE_24_length_98615_cov_20064709	81768-97927
GCA_016624745.1	Erwinia_sp_S43	55.37	1	incomplete	12.7	53.43	JACVTX0100000141_sp_S43_NODE_14_length_132464_cov_59289843	54257-66993
GCA_016624745.1	Erwinia_sp_S43	55.37	3	intact	90.3	53.15	JACVTX0100000061_sp_S43_NODE_6_length_243774_cov_55793425	92703-183020
GCA_016624745.1	Erwinia_sp_S43	55.37	2	intact	32.7	53.03	JACVTX0100000031_sp_S43_NODE_3_length_418147_cov_50382309	240583-273335
GCA_000026185.1	Erwinia_tasmaniensis_ET1_99	53.39	2	incomplete	28.5	48.13	CU4681351_tasmaniensis_strain_ET1_99_complete_chromosome	1076115-1104693
GCA_000026185.1	Erwinia_tasmaniensis_ET1_99	53.39	3	questionable	33.9	48.33	CU4681331_tasmaniensis_strain_ET1_99_complete_plasmid_pET46	11886-45791
GCA_000026185.1	Erwinia_tasmaniensis_ET1_99	53.39	1	incomplete	35.7	52.98	CU4681351_tasmaniensis_strain_ET1_99_complete_chromosome	625327-661033
GCA_000336255.1	Erwinia_toletana_DAPP_PG_735	52.89	2	intact	42.6	52.17	KB3728081_toletana_DAPP_PG_735_genomic_scaffold_scf_2378_51	28-42653
GCA_000336255.1	Erwinia_toletana_DAPP_PG_735	52.89	3	questionable	17.9	43.79	KB3728091_toletana_DAPP_PG_735_genomic_scaffold_scf_2378_621	1-17944
GCA_000336255.1	Erwinia_toletana_DAPP_PG_735	52.89	5	questionable	18.1	52.34	KB3728101_toletana_DAPP_PG_735_genomic_scaffold_scf_2378_81	434745-452846
GCA_000336255.1	Erwinia_toletana_DAPP_PG_735	52.89	4	incomplete	43.4	48.95	KB3728101_toletana_DAPP_PG_735_genomic_scaffold_scf_2378_81	185072-228563
GCA_000336255.1	Erwinia_toletana_DAPP_PG_735	52.89	1	incomplete	29.8	50.31	KB3728051_toletana_DAPP_PG_735_genomic_scaffold_scf_2378_2291	169192-199049
GCA_017875465.1	Erwinia_toletana_WS4403_Ga0466831	53.56	6	questionable	24.4	48.59	JAGGMQ0100000011_toletana_strain_WS4403_Ga0466831_01	4315519-4339944
GCA_017875465.1	Erwinia_toletana_WS4403_Ga0466831	53.56	1	intact	31.1	50.95	JAGGMQ0100000011_toletana_strain_WS4403_Ga0466831_01	195627-226799
GCA_017875465.1	Erwinia_toletana_WS4403_Ga0466831	53.56	5	incomplete	29.8	50.31	JAGGMQ0100000011_toletana_strain_WS4403_Ga0466831_01	4237186-4267043
GCA_017875465.1	Erwinia_toletana_WS4403_Ga0466831	53.56	4	incomplete	5.1	50.47	JAGGMQ0100000011_toletana_strain_WS4403_Ga0466831_01	2774689-2779814
GCA_017875465.1	Erwinia_toletana_WS4403_Ga0466831	53.56	3	incomplete	28.8	51.16	JAGGMQ0100000011_toletana_strain_WS4403_Ga0466831_01	1202422-1231241
GCA_017875465.1	Erwinia_toletana_WS4403_Ga0466831	53.56	2	questionable	18.1	52.34	JAGGMQ0100000011_toletana_strain_WS4403_Ga0466831_01	980000-998101
GCA_021365465.1	Erwinia_tracheiphila_BHKY	50.51	24	intact	26.7	51.42	CP0899321_tracheiphila_strain_BHKY_chromosome	2546956-2573696
GCA_021365465.1	Erwinia_tracheiphila_BHKY	50.51	18	questionable	8.5	50.37	CP0899321_tracheiphila_strain_BHKY_chromosome	2001334-2009889
GCA_021365465.1	Erwinia_tracheiphila_BHKY	50.51	31	intact	31.2	48.17	CP0899321_tracheiphila_strain_BHKY_chromosome	3410522-3441762
GCA_021365465.1	Erwinia_tracheiphila_BHKY	50.51	35	intact	59.2	54.76	CP0899321_tracheiphila_strain_BHKY_chromosome	3837529-3896773
GCA_021365465.1	Erwinia_tracheiphila_BHKY	50.51	30	intact	26.6	47.05	CP0899321_tracheiphila_strain_BHKY_chromosome	3398345-3425005
GCA_021365465.1	Erwinia_tracheiphila_BHKY	50.51	40	incomplete	13	49.03	CP0899331_tracheiphila_strain_BHKY_plasmid_pETR004_b	14647-27711
GCA_021365465.1	Erwinia_tracheiphila_BHKY	50.51	14	intact	31.5	47.43	CP0899321_tracheiphila_strain_BHKY_chromosome	1579528-1611031
GCA_021365465.1	Erwinia_tracheiphila_BHKY	50.51	15	intact	10.6	51.51	CP0899321_tracheiphila_strain_BHKY_chromosome	1750300-1760955
GCA_021365465.1	Erwinia_tracheiphila_BHKY	50.51	4	intact	32.8	52.65	CP0899321_tracheiphila_strain_BHKY_chromosome	327394-360201
GCA_021365465.1	Erwinia_tracheiphila_BHKY	50.51	1	incomplete	16	54.48	CP0899321_tracheiphila_strain_BHKY_chromosome	23721-39777
GCA_021365465.1	Erwinia_tracheiphila_BHKY	50.51	26	intact	9.9	52.2	CP0899321_tracheiphila_strain_BHKY_chromosome	2664580-2674571
GCA_021365465.1	Erwinia_tracheiphila_BHKY	50.51	17	intact	66.7	49.31	CP0899321_tracheiphila_strain_BHKY_chromosome	1938034-2004749
GCA_021365465.1	Erwinia_tracheiphila_BHKY	50.51	34	intact	70.1	49.81	CP0899321_tracheiphila_strain_BHKY_chromosome	3781865-3851965
GCA_021365465.1	Erwinia_tracheiphila_BHKY	50.51	38	questionable	31.3	49.48	CP0899321_tracheiphila_strain_BHKY_chromosome	4716493-4747826
GCA_021365465.1	Erwinia_tracheiphila_BHKY	50.51	10	intact	45.6	54.55	CP0899321_tracheiphila_strain_BHKY_chromosome	1246675-1292340
GCA_021365465.1	Erwinia_tracheiphila_BHKY	50.51	21	intact	13.2	50.38	CP0899321_tracheiphila_strain_BHKY_chromosome	2389742-2402972
GCA_021365465.1	Erwinia_tracheiphila_BHKY	50.51	33	questionable	19.1	45.89	CP0899321_tracheiphila_strain_BHKY_chromosome	3718838-3737998
GCA_021365465.1	Erwinia_tracheiphila_BHKY	50.51	25	intact	37.7	50.04	CP0899321_tracheiphila_strain_BHKY_chromosome	2634078-2671839
GCA_021365465.1	Erwinia_tracheiphila_BHKY	50.51	16	incomplete	10.7	51.26	CP0899321_tracheiphila_strain_BHKY_chromosome	1914485-1925270
GCA_021365465.1	Erwinia_tracheiphila_BHKY	50.51	22	intact	33.6	49.45	CP0899321_tracheiphila_strain_BHKY_chromosome	2437915-2471572
GCA_021365465.1	Erwinia_tracheiphila_BHKY	50.51	37	intact	46.6	47.89	CP0899321_tracheiphila_strain_BHKY_chromosome	4528208-4574857
GCA_021365465.1	Erwinia_tracheiphila_BHKY	50.51	8	intact	35	56.23	CP0899321_tracheiphila_strain_BHKY_chromosome	1133498-1168582
GCA_021365465.1	Erwinia_tracheiphila_BHKY	50.51	19	intact	38.3	53.52	CP0899321_tracheiphila_strain_BHKY_chromosome	2044126-2082466
GCA_021365465.1	Erwinia_tracheiphila_BHKY	50.51	3	incomplete	7.7	50.17	CP0899321_tracheiphila_strain_BHKY_chromosome	317395-325141
GCA_021365465.1	Erwinia_tracheiphila_BHKY	50.51	27	intact	38.7	50.07	CP0899321_tracheiphila_strain_BHKY_chromosome	2758781-2797571
GCA_021365465.1	Erwinia_tracheiphila_BHKY	50.51	29	questionable	14.2	49.8	CP0899321_tracheiphila_strain_BHKY_chromosome	3386694-3400939
GCA_021365465.1	Erwinia_tracheiphila_BHKY	50.51	2	incomplete	23.1	49.7	CP0899321_tracheiphila_strain_BHKY_chromosome	74940-98124
GCA_021365465.1	Erwinia_tracheiphila_BHKY	50.51	39	intact	32.2	49.08	CP0899321_tracheiphila_strain_BHKY_chromosome	4833986-4866194
GCA_021365465.1	Erwinia_tracheiphila_BHKY	50.51	9	intact	31.5	53.67	CP0899321_tracheiphila_strain_BHKY_chromosome	1190560-1222079
GCA_021365465.1	Erwinia_tracheiphila_BHKY	50.51	11	intact	42.6	47.06	CP0899321_tracheiphila_strain_BHKY_chromosome	1454243-1496905
GCA_021365465.1	Erwinia_tracheiphila_BHKY	50.51	7	intact	20.2	50.13	CP0899321_tracheiphila_strain_BHKY_chromosome	579276-599565
GCA_021365465.1	Erwinia_tracheiphila_BHKY	50.51	13	incomplete	10	49.15	CP0899321_tracheiphila_strain_BHKY_chromosome	1576973-1586978
GCA_021365465.1	Erwinia_tracheiphila_BHKY	50.51	5	incomplete	16.6	51.29	CP0899321_tracheiphila_strain_BHKY_chromosome	373102-389751
GCA_021365465.1	Erwinia_tracheiphila_BHKY	50.51	23	intact	17.1	48.34	CP0899321_tracheiphila_strain_BHKY_chromosome	2473881-2491002
GCA_021365465.1	Erwinia_tracheiphila_BHKY	50.51	20	intact	46.8	52.19	CP0899321_tracheiphila_strain_BHKY_chromosome	2192052-2238865
GCA_021365465.1	Erwinia_tracheiphila_BHKY	50.51	6	incomplete	5.7	53.06	CP0899321_tracheiphila_strain_BHKY_chromosome	493765-499465
GCA_021365465.1	Erwinia_tracheiphila_BHKY	50.51	28	questionable	9.4	48.33	CP0899321_tracheiphila_strain_BHKY_chromosome	2797626-2807041
GCA_021365465.1	Erwinia_tracheiphila_BHKY	50.51	32	incomplete	24.8	50.65	CP0899321_tracheiphila_strain_BHKY_chromosome	3676188-3701075
GCA_021365465.1	Erwinia_tracheiphila_BHKY	50.51	36	incomplete	7.5	51.95	CP0899321_tracheiphila_strain_BHKY_chromosome	4464265-4471844
GCA_021365465.1	Erwinia_tracheiphila_BHKY	50.51	12	questionable	40.2	51.22	CP0899321_tracheiphila_strain_BHKY_chromosome	1507768-1548025
GCA_021365505.1	Erwinia_tracheiphila_BuffGH	50.57	27	intact	36.4	49.98	CP0899401_tracheiphila_strain_BuffGH_chromosome	2899760-2936234
GCA_021365505.1	Erwinia_tracheiphila_BuffGH	50.57	13	questionable	40.2	51.23	CP0899401_tracheiphila_strain_BuffGH_chromosome	1756214-1796474
GCA_021365505.1	Erwinia_tracheiphila_BuffGH	50.57	34	incomplete	24.8	50.65	CP0899401_tracheiphila_strain_BuffGH_chromosome	3940377-3965264
GCA_021365505.1	Erwinia_tracheiphila_BuffGH	50.57	33	intact	31.2	48.17	CP0899401_tracheiphila_strain_BuffGH_chromosome	3674865-3706106
GCA_021365505.1	Erwinia_tracheiphila_BuffGH	50.57	12	intact	42.6	47.09	CP0899401_tracheiphila_strain_BuffGH_chromosome	1702731-1745351
GCA_021365505.1	Erwinia_tracheiphila_BuffGH	50.57	38	incomplete	7.5	51.95	CP0899401_tracheiphila_strain_BuffGH_chromosome	4728562-4736141
GCA_021365505.1	Erwinia_tracheiphila_BuffGH	50.57	4	intact	46.5	47.87	CP0899401_tracheiphila_strain_BuffGH_chromosome	499809-546368
GCA_021365505.1	Erwinia_tracheiphila_BuffGH	50.57	21	intact	38.3	53.52	CP0899401_tracheiphila_strain_BuffGH_chromosome	2358009-2396350
GCA_021365505.1	Erwinia_tracheiphila_BuffGH	50.57	25	questionable	16	48.03	CP0899401_tracheiphila_strain_BuffGH_chromosome	2789161-2805255
GCA_021365505.1	Erwinia_tracheiphila_BuffGH	50.57	37	intact	59.2	54.75	CP0899401_tracheiphila_strain_BuffGH_chromosome	4101718-4160953
GCA_021365505.1	Erwinia_tracheiphila_BuffGH	50.57	31	questionable	14.2	49.8	CP0899401_tracheiphila_strain_BuffGH_chromosome	3651037-3665282
GCA_021365505.1	Erwinia_tracheiphila_BuffGH	50.57	22	intact	47.1	52.28	CP0899401_tracheiphila_strain_BuffGH_chromosome	2505931-2553101
GCA_021365505.1	Erwinia_tracheiphila_BuffGH	50.57	15	intact	31.5	47.42	CP0899401_tracheiphila_strain_BuffGH_chromosome	1827977-1859480
GCA_021365505.1	Erwinia_tracheiphila_BuffGH	50.57	1	questionable	16	54.48	CP0899401_tracheiphila_strain_BuffGH_chromosome	23721-39777
GCA_021365505.1	Erwinia_tracheiphila_BuffGH	50.57	28	intact	9.9	52.2	CP0899401_tracheiphila_strain_BuffGH_chromosome	2928975-2938966
GCA_021365505.1	Erwinia_tracheiphila_BuffGH	50.57	19	intact	66.7	49.31	CP0899401_tracheiphila_strain_BuffGH_chromosome	2251889-2318606
GCA_021365505.1	Erwinia_tracheiphila_BuffGH	50.57	16	intact	44.7	53.44	CP0899401_tracheiphila_strain_BuffGH_chromosome	1997866-2042658
GCA_021365505.1	Erwinia_tracheiphila_BuffGH	50.57	3	questionable	13	47.24	CP0899401_tracheiphila_strain_BuffGH_chromosome	334994-348055
GCA_021365505.1	Erwinia_tracheiphila_BuffGH	50.57	7	incomplete	5.7	53.06	CP0899401_tracheiphila_strain_BuffGH_chromosome	742646-748346
GCA_021365505.1	Erwinia_tracheiphila_BuffGH	50.57	18	incomplete	10.7	51.26	CP0899401_tracheiphila_strain_BuffGH_chromosome	2228340-2239125
GCA_021365505.1	Erwinia_tracheiphila_BuffGH	50.57	6	questionable	16.6	51.28	CP0899401_tracheiphila_strain_BuffGH_chromosome	621976-638630
GCA_021365505.1	Erwinia_tracheiphila_BuffGH	50.57	29	intact	38.7	50.07	CP0899401_tracheiphila_strain_BuffGH_chromosome	3023177-3061914
GCA_021365505.1	Erwinia_tracheiphila_BuffGH	50.57	5	intact	39	52.59	CP0899401_tracheiphila_strain_BuffGH_chromosome	570048-609075
GCA_021365505.1	Erwinia_tracheiphila_BuffGH	50.57	32	intact	26.6	47.05	CP0899401_tracheiphila_strain_BuffGH_chromosome	3662688-3689349
GCA_021365505.1	Erwinia_tracheiphila_BuffGH	50.57	24	intact	33.6	49.45	CP0899401_tracheiphila_strain_BuffGH_chromosome	2752164-2785826
GCA_021365505.1	Erwinia_tracheiphila_BuffGH	50.57	10	intact	31.5	53.67	CP0899401_tracheiphila_strain_BuffGH_chromosome	1438985-1470501
GCA_021365505.1	Erwinia_tracheiphila_BuffGH	50.57	9	intact	35	56.23	CP0899401_tracheiphila_strain_BuffGH_chromosome	1381923-1417007
GCA_021365505.1	Erwinia_tracheiphila_BuffGH	50.57	40	intact	32.2	49.07	CP0899401_tracheiphila_strain_BuffGH_chromosome	4849384-4881593
GCA_021365505.1	Erwinia_tracheiphila_BuffGH	50.57	35	questionable	19.1	45.89	CP0899401_tracheiphila_strain_BuffGH_chromosome	3983027-4002187
GCA_021365505.1	Erwinia_tracheiphila_BuffGH	50.57	8	intact	20.2	50.13	CP0899401_tracheiphila_strain_BuffGH_chromosome	827700-847989
GCA_021365505.1	Erwinia_tracheiphila_BuffGH	50.57	11	intact	45.6	54.55	CP0899401_tracheiphila_strain_BuffGH_chromosome	1495097-1540763
GCA_021365505.1	Erwinia_tracheiphila_BuffGH	50.57	26	intact	22.8	51.88	CP0899401_tracheiphila_strain_BuffGH_chromosome	2861208-2884069
GCA_021365505.1	Erwinia_tracheiphila_BuffGH	50.57	2	incomplete	23.1	49.69	CP0899401_tracheiphila_strain_BuffGH_chromosome	74940-98127
GCA_021365505.1	Erwinia_tracheiphila_BuffGH	50.57	39	questionable	42.5	50.88	CP0899401_tracheiphila_strain_BuffGH_chromosome	4741670-4784184
GCA_021365505.1	Erwinia_tracheiphila_BuffGH	50.57	36	intact	70.1	49.81	CP0899401_tracheiphila_strain_BuffGH_chromosome	4046053-4116153
GCA_021365505.1	Erwinia_tracheiphila_BuffGH	50.57	17	intact	36.4	53.69	CP0899401_tracheiphila_strain_BuffGH_chromosome	2098410-2134896
GCA_021365505.1	Erwinia_tracheiphila_BuffGH	50.57	41	questionable	13.9	48.6	CP0899411_tracheiphila_strain_BuffGH_plasmid_pETR004_c	10041-23992
GCA_021365505.1	Erwinia_tracheiphila_BuffGH	50.57	14	incomplete	10	49.15	CP0899401_tracheiphila_strain_BuffGH_chromosome	1825422-1835427
GCA_021365505.1	Erwinia_tracheiphila_BuffGH	50.57	30	questionable	9.4	48.33	CP0899401_tracheiphila_strain_BuffGH_chromosome	3061969-3071384
GCA_021365505.1	Erwinia_tracheiphila_BuffGH	50.57	20	questionable	8.5	50.37	CP0899401_tracheiphila_strain_BuffGH_chromosome	2315191-2323746
GCA_021365505.1	Erwinia_tracheiphila_BuffGH	50.57	23	intact	13.2	50.38	CP0899401_tracheiphila_strain_BuffGH_chromosome	2704002-2717232
GCA_021365535.1	Erwinia_tracheiphila_MDCuke	50.49	22	intact	67.8	49.14	CP0899421_tracheiphila_strain_MDCuke_chromosome	2756167-2824034
GCA_021365535.1	Erwinia_tracheiphila_MDCuke	50.49	9	questionable	18.2	48.05	CP0899421_tracheiphila_strain_MDCuke_chromosome	1304564-1322793
GCA_021365535.1	Erwinia_tracheiphila_MDCuke	50.49	28	intact	34.3	50.95	CP0899421_tracheiphila_strain_MDCuke_chromosome	3251597-3285982
GCA_021365535.1	Erwinia_tracheiphila_MDCuke	50.49	10	intact	62	50.77	CP0899421_tracheiphila_strain_MDCuke_chromosome	1324923-1386970
GCA_021365535.1	Erwinia_tracheiphila_MDCuke	50.49	26	questionable	10.1	51.84	CP0899421_tracheiphila_strain_MDCuke_chromosome	3039441-3049612
GCA_021365535.1	Erwinia_tracheiphila_MDCuke	50.49	25	intact	40.4	52.5	CP0899421_tracheiphila_strain_MDCuke_chromosome	2989960-3030418
GCA_021365535.1	Erwinia_tracheiphila_MDCuke	50.49	23	incomplete	10.8	51.35	CP0899421_tracheiphila_strain_MDCuke_chromosome	2847474-2858273
GCA_021365535.1	Erwinia_tracheiphila_MDCuke	50.49	32	incomplete	30.7	50.31	CP0899421_tracheiphila_strain_MDCuke_chromosome	3699842-3730574
GCA_021365535.1	Erwinia_tracheiphila_MDCuke	50.49	29	incomplete	11.9	48.9	CP0899421_tracheiphila_strain_MDCuke_chromosome	3287061-3298968
GCA_021365535.1	Erwinia_tracheiphila_MDCuke	50.49	18	intact	19.9	49.92	CP0899421_tracheiphila_strain_MDCuke_chromosome	2323588-2343508
GCA_021365535.1	Erwinia_tracheiphila_MDCuke	50.49	33	incomplete	18.7	47.54	CP0899421_tracheiphila_strain_MDCuke_chromosome	4091574-4110339
GCA_021365535.1	Erwinia_tracheiphila_MDCuke	50.49	31	questionable	7.2	51.61	CP0899421_tracheiphila_strain_MDCuke_chromosome	3687763-3694979
GCA_021365535.1	Erwinia_tracheiphila_MDCuke	50.49	2	incomplete	13.1	50.49	CP0899421_tracheiphila_strain_MDCuke_chromosome	348027-361158
GCA_021365535.1	Erwinia_tracheiphila_MDCuke	50.49	5	intact	29.6	54.96	CP0899421_tracheiphila_strain_MDCuke_chromosome	709215-738901
GCA_021365535.1	Erwinia_tracheiphila_MDCuke	50.49	34	incomplete	28.5	47.77	CP0899421_tracheiphila_strain_MDCuke_chromosome	4268151-4296673
GCA_021365535.1	Erwinia_tracheiphila_MDCuke	50.49	40	questionable	12	48.42	CP0899461_tracheiphila_strain_MDCuke_plasmid_pETR004_a	8135-20218
GCA_021365535.1	Erwinia_tracheiphila_MDCuke	50.49	12	questionable	9.4	48.26	CP0899421_tracheiphila_strain_MDCuke_chromosome	2004289-2013703
GCA_021365535.1	Erwinia_tracheiphila_MDCuke	50.49	11	intact	36.7	55.44	CP0899421_tracheiphila_strain_MDCuke_chromosome	1415860-1452575
GCA_021365535.1	Erwinia_tracheiphila_MDCuke	50.49	39	questionable	31.1	51.02	CP0899451_tracheiphila_strain_MDCuke_plasmid_pETR003_a	1-31191
GCA_021365535.1	Erwinia_tracheiphila_MDCuke	50.49	1	intact	46.1	54.75	CP0899421_tracheiphila_strain_MDCuke_chromosome	297499-343639
GCA_021365535.1	Erwinia_tracheiphila_MDCuke	50.49	30	intact	29.2	54.02	CP0899421_tracheiphila_strain_MDCuke_chromosome	3580219-3609480
GCA_021365535.1	Erwinia_tracheiphila_MDCuke	50.49	17	intact	22	52.72	CP0899421_tracheiphila_strain_MDCuke_chromosome	2285409-2307462
GCA_021365535.1	Erwinia_tracheiphila_MDCuke	50.49	19	questionable	11.8	49.82	CP0899421_tracheiphila_strain_MDCuke_chromosome	2407797-2419608
GCA_021365535.1	Erwinia_tracheiphila_MDCuke	50.49	7	incomplete	17	46.91	CP0899421_tracheiphila_strain_MDCuke_chromosome	861046-878134
GCA_021365535.1	Erwinia_tracheiphila_MDCuke	50.49	37	questionable	15.3	48.65	CP0899421_tracheiphila_strain_MDCuke_chromosome	4694614-4709922
GCA_021365535.1	Erwinia_tracheiphila_MDCuke	50.49	4	questionable	41.8	51.11	CP0899421_tracheiphila_strain_MDCuke_chromosome	677520-719345
GCA_021365535.1	Erwinia_tracheiphila_MDCuke	50.49	24	questionable	28.2	50.6	CP0899421_tracheiphila_strain_MDCuke_chromosome	2904350-2932587
GCA_021365535.1	Erwinia_tracheiphila_MDCuke	50.49	13	intact	82.3	49.35	CP0899421_tracheiphila_strain_MDCuke_chromosome	2013744-2096135
GCA_021365535.1	Erwinia_tracheiphila_MDCuke	50.49	14	questionable	14.2	47.48	CP0899421_tracheiphila_strain_MDCuke_chromosome	2085144-2099398
GCA_021365535.1	Erwinia_tracheiphila_MDCuke	50.49	27	intact	32.5	48.19	CP0899421_tracheiphila_strain_MDCuke_chromosome	3193392-3225928
GCA_021365535.1	Erwinia_tracheiphila_MDCuke	50.49	15	intact	10.1	51.99	CP0899421_tracheiphila_strain_MDCuke_chromosome	2178428-2188606
GCA_021365535.1	Erwinia_tracheiphila_MDCuke	50.49	36	intact	33.4	50.16	CP0899421_tracheiphila_strain_MDCuke_chromosome	4587055-4620477
GCA_021365535.1	Erwinia_tracheiphila_MDCuke	50.49	6	intact	42.5	54.65	CP0899421_tracheiphila_strain_MDCuke_chromosome	780655-823168
GCA_021365535.1	Erwinia_tracheiphila_MDCuke	50.49	8	intact	31	53.59	CP0899421_tracheiphila_strain_MDCuke_chromosome	1082394-1113397
GCA_021365535.1	Erwinia_tracheiphila_MDCuke	50.49	3	incomplete	10.5	50.12	CP0899421_tracheiphila_strain_MDCuke_chromosome	483068-493663
GCA_021365535.1	Erwinia_tracheiphila_MDCuke	50.49	35	incomplete	12.5	51.71	CP0899421_tracheiphila_strain_MDCuke_chromosome	4571865-4584432
GCA_021365535.1	Erwinia_tracheiphila_MDCuke	50.49	16	incomplete	36.3	50.3	CP0899421_tracheiphila_strain_MDCuke_chromosome	2182026-2218416
GCA_021365535.1	Erwinia_tracheiphila_MDCuke	50.49	38	intact	49.1	53.76	CP0899421_tracheiphila_strain_MDCuke_chromosome	4819248-4868439
GCA_021365535.1	Erwinia_tracheiphila_MDCuke	50.49	20	incomplete	25.1	49.83	CP0899421_tracheiphila_strain_MDCuke_chromosome	2650050-2675171
GCA_021365535.1	Erwinia_tracheiphila_MDCuke	50.49	21	questionable	14.6	48.03	CP0899421_tracheiphila_strain_MDCuke_chromosome	2746823-2761518
GCA_000404125.1	Erwinia_tracheiphila_PSU_1	44.99	18	incomplete	6.4	43.99	KE1363161_tracheiphila_PSU_1_genomic_scaffold_scaffold00009	149967-156384
GCA_000404125.1	Erwinia_tracheiphila_PSU_1	44.99	10	questionable	40.1	52.37	KE1363121_tracheiphila_PSU_1_genomic_scaffold_scaffold00005	128701-168824
GCA_000404125.1	Erwinia_tracheiphila_PSU_1	44.99	12	incomplete	12.5	42.72	KE1363131_tracheiphila_PSU_1_genomic_scaffold_scaffold00006	6555-19125
GCA_000404125.1	Erwinia_tracheiphila_PSU_1	44.99	13	incomplete	17.4	32.29	KE1363131_tracheiphila_PSU_1_genomic_scaffold_scaffold00006	62594-80021
GCA_000404125.1	Erwinia_tracheiphila_PSU_1	44.99	11	intact	28.9	54.38	KE1363121_tracheiphila_PSU_1_genomic_scaffold_scaffold00005	193420-222330
GCA_000404125.1	Erwinia_tracheiphila_PSU_1	44.99	3	questionable	3.3	49.18	KE1363081_tracheiphila_PSU_1_genomic_scaffold_scaffold00001	153394-156734
GCA_000404125.1	Erwinia_tracheiphila_PSU_1	44.99	5	incomplete	9.9	38.82	KE1363081_tracheiphila_PSU_1_genomic_scaffold_scaffold00001	872328-882269
GCA_000404125.1	Erwinia_tracheiphila_PSU_1	44.99	2	incomplete	6.7	39.89	KE1363081_tracheiphila_PSU_1_genomic_scaffold_scaffold00001	134473-141203
GCA_000404125.1	Erwinia_tracheiphila_PSU_1	44.99	22	incomplete	16.2	56.73	KE1363261_tracheiphila_PSU_1_genomic_scaffold_scaffold00019	1-16296
GCA_000404125.1	Erwinia_tracheiphila_PSU_1	44.99	19	intact	33.5	56.46	KE1363181_tracheiphila_PSU_1_genomic_scaffold_scaffold00011	36633-70229
GCA_000404125.1	Erwinia_tracheiphila_PSU_1	44.99	16	incomplete	31.1	38.72	KE1363141_tracheiphila_PSU_1_genomic_scaffold_scaffold00007	87495-118616
GCA_000404125.1	Erwinia_tracheiphila_PSU_1	44.99	8	incomplete	15.4	48.3	KE1363101_tracheiphila_PSU_1_genomic_scaffold_scaffold00003	514507-529992
GCA_000404125.1	Erwinia_tracheiphila_PSU_1	44.99	4	incomplete	8	41.94	KE1363081_tracheiphila_PSU_1_genomic_scaffold_scaffold00001	278846-286912
GCA_000404125.1	Erwinia_tracheiphila_PSU_1	44.99	6	questionable	18	46.26	KE1363081_tracheiphila_PSU_1_genomic_scaffold_scaffold00001	877201-895265
GCA_000404125.1	Erwinia_tracheiphila_PSU_1	44.99	17	incomplete	41.3	41.61	KE1363151_tracheiphila_PSU_1_genomic_scaffold_scaffold00008	17057-58427
GCA_000404125.1	Erwinia_tracheiphila_PSU_1	44.99	15	incomplete	12.8	49.1	KE1363141_tracheiphila_PSU_1_genomic_scaffold_scaffold00007	83657-96543
GCA_000404125.1	Erwinia_tracheiphila_PSU_1	44.99	1	intact	18.8	46.41	KE1363081_tracheiphila_PSU_1_genomic_scaffold_scaffold00001	80295-99158
GCA_000404125.1	Erwinia_tracheiphila_PSU_1	44.99	20	incomplete	8.7	47.79	KE1363201_tracheiphila_PSU_1_genomic_scaffold_scaffold00013	38048-46767
GCA_000404125.1	Erwinia_tracheiphila_PSU_1	44.99	9	intact	46.2	45.34	KE1363111_tracheiphila_PSU_1_genomic_scaffold_scaffold00004	40553-86759
GCA_000404125.1	Erwinia_tracheiphila_PSU_1	44.99	7	incomplete	18.8	48.11	KE1363091_tracheiphila_PSU_1_genomic_scaffold_scaffold00002	646792-665610
GCA_000404125.1	Erwinia_tracheiphila_PSU_1	44.99	21	incomplete	19.8	47.09	KE1363201_tracheiphila_PSU_1_genomic_scaffold_scaffold00013	64971-84843
GCA_000404125.1	Erwinia_tracheiphila_PSU_1	44.99	14	incomplete	4.7	52.65	KE1363131_tracheiphila_PSU_1_genomic_scaffold_scaffold00006	224308-229019
GCA_021365485.1	Erwinia_tracheiphila_SCR3	50.49	32	questionable	7.1	51.56	CP0899341_tracheiphila_strain_SCR3_chromosome	3629073-3636263
GCA_021365485.1	Erwinia_tracheiphila_SCR3	50.49	33	incomplete	30.7	50.31	CP0899341_tracheiphila_strain_SCR3_chromosome	3641126-3671858
GCA_021365485.1	Erwinia_tracheiphila_SCR3	50.49	11	incomplete	6.9	50.85	CP0899341_tracheiphila_strain_SCR3_chromosome	1369352-1376330
GCA_021365485.1	Erwinia_tracheiphila_SCR3	50.49	30	questionable	35	47.51	CP0899341_tracheiphila_strain_SCR3_chromosome	3274867-3309900
GCA_021365485.1	Erwinia_tracheiphila_SCR3	50.49	21	questionable	14.6	48.04	CP0899341_tracheiphila_strain_SCR3_chromosome	2691393-2706086
GCA_021365485.1	Erwinia_tracheiphila_SCR3	50.49	7	incomplete	17.1	46.82	CP0899341_tracheiphila_strain_SCR3_chromosome	861159-878296
GCA_021365485.1	Erwinia_tracheiphila_SCR3	50.49	23	questionable	14.3	52.05	CP0899341_tracheiphila_strain_SCR3_chromosome	2786561-2800948
GCA_021365485.1	Erwinia_tracheiphila_SCR3	50.49	8	intact	31.2	53.58	CP0899341_tracheiphila_strain_SCR3_chromosome	1076166-1107373
GCA_021365485.1	Erwinia_tracheiphila_SCR3	50.49	5	intact	29.2	54.94	CP0899341_tracheiphila_strain_SCR3_chromosome	709335-738633
GCA_021365485.1	Erwinia_tracheiphila_SCR3	50.49	39	intact	49.1	53.76	CP0899341_tracheiphila_strain_SCR3_chromosome	4760708-4809862
GCA_021365485.1	Erwinia_tracheiphila_SCR3	50.49	29	incomplete	11.9	48.9	CP0899341_tracheiphila_strain_SCR3_chromosome	3235218-3247125
GCA_021365485.1	Erwinia_tracheiphila_SCR3	50.49	27	intact	32.5	48.19	CP0899341_tracheiphila_strain_SCR3_chromosome	3141549-3174085
GCA_021365485.1	Erwinia_tracheiphila_SCR3	50.49	31	intact	29.2	54.02	CP0899341_tracheiphila_strain_SCR3_chromosome	3521504-3550763
GCA_021365485.1	Erwinia_tracheiphila_SCR3	50.49	6	intact	42.7	54.64	CP0899341_tracheiphila_strain_SCR3_chromosome	780509-823281
GCA_021365485.1	Erwinia_tracheiphila_SCR3	50.49	38	incomplete	24.4	51.83	CP0899341_tracheiphila_strain_SCR3_chromosome	4648279-4672718
GCA_021365485.1	Erwinia_tracheiphila_SCR3	50.49	28	intact	34.3	50.95	CP0899341_tracheiphila_strain_SCR3_chromosome	3199754-3234139
GCA_021365485.1	Erwinia_tracheiphila_SCR3	50.49	1	intact	46.2	54.88	CP0899341_tracheiphila_strain_SCR3_chromosome	297505-343772
GCA_021365485.1	Erwinia_tracheiphila_SCR3	50.49	10	intact	59.6	50.11	CP0899341_tracheiphila_strain_SCR3_chromosome	1310656-1370302
GCA_021365485.1	Erwinia_tracheiphila_SCR3	50.49	15	intact	10.1	52	CP0899341_tracheiphila_strain_SCR3_chromosome	2122492-2132672
GCA_021365485.1	Erwinia_tracheiphila_SCR3	50.49	13	questionable	9.4	48.22	CP0899341_tracheiphila_strain_SCR3_chromosome	1998648-2008063
GCA_021365485.1	Erwinia_tracheiphila_SCR3	50.49	36	intact	33.4	50.16	CP0899341_tracheiphila_strain_SCR3_chromosome	4526250-4559673
GCA_021365485.1	Erwinia_tracheiphila_SCR3	50.49	40	incomplete	30.1	51.4	CP0899351_tracheiphila_strain_SCR3_plasmid_pETR001_b	15464-45576
GCA_021365485.1	Erwinia_tracheiphila_SCR3	50.49	25	intact	40.4	52.49	CP0899341_tracheiphila_strain_SCR3_chromosome	2932791-2973248
GCA_021365485.1	Erwinia_tracheiphila_SCR3	50.49	19	questionable	11.8	49.82	CP0899341_tracheiphila_strain_SCR3_chromosome	2352428-2364239
GCA_021365485.1	Erwinia_tracheiphila_SCR3	50.49	22	intact	71.3	49.33	CP0899341_tracheiphila_strain_SCR3_chromosome	2699568-2770903
GCA_021365485.1	Erwinia_tracheiphila_SCR3	50.49	35	incomplete	28.4	47.77	CP0899341_tracheiphila_strain_SCR3_chromosome	4207408-4235882
GCA_021365485.1	Erwinia_tracheiphila_SCR3	50.49	34	incomplete	18.7	47.53	CP0899341_tracheiphila_strain_SCR3_chromosome	4030832-4049597
GCA_021365485.1	Erwinia_tracheiphila_SCR3	50.49	9	questionable	18.2	48.06	CP0899341_tracheiphila_strain_SCR3_chromosome	1298532-1316761
GCA_021365485.1	Erwinia_tracheiphila_SCR3	50.49	41	questionable	27.5	51.42	CP0899371_tracheiphila_strain_SCR3_plasmid_pETR006_a	1-27588
GCA_021365485.1	Erwinia_tracheiphila_SCR3	50.49	2	incomplete	13.1	50.49	CP0899341_tracheiphila_strain_SCR3_chromosome	348160-361291
GCA_021365485.1	Erwinia_tracheiphila_SCR3	50.49	18	intact	19.9	49.92	CP0899341_tracheiphila_strain_SCR3_chromosome	2268203-2288124
GCA_021365485.1	Erwinia_tracheiphila_SCR3	50.49	3	incomplete	10.5	50.13	CP0899341_tracheiphila_strain_SCR3_chromosome	483203-493798
GCA_021365485.1	Erwinia_tracheiphila_SCR3	50.49	16	incomplete	36.3	50.28	CP0899341_tracheiphila_strain_SCR3_chromosome	2126090-2162480
GCA_021365485.1	Erwinia_tracheiphila_SCR3	50.49	14	intact	35.3	48.85	CP0899341_tracheiphila_strain_SCR3_chromosome	2008104-2043463
GCA_021365485.1	Erwinia_tracheiphila_SCR3	50.49	37	questionable	15.3	48.64	CP0899341_tracheiphila_strain_SCR3_chromosome	4633815-4649124
GCA_021365485.1	Erwinia_tracheiphila_SCR3	50.49	4	incomplete	18	49.89	CP0899341_tracheiphila_strain_SCR3_chromosome	687940-705979
GCA_021365485.1	Erwinia_tracheiphila_SCR3	50.49	24	questionable	28.2	50.59	CP0899341_tracheiphila_strain_SCR3_chromosome	2847024-2875285
GCA_021365485.1	Erwinia_tracheiphila_SCR3	50.49	26	questionable	10.1	51.84	CP0899341_tracheiphila_strain_SCR3_chromosome	2982271-2992442
GCA_021365485.1	Erwinia_tracheiphila_SCR3	50.49	12	intact	36.4	55.47	CP0899341_tracheiphila_strain_SCR3_chromosome	1408998-1445454
GCA_021365485.1	Erwinia_tracheiphila_SCR3	50.49	17	intact	22	52.66	CP0899341_tracheiphila_strain_SCR3_chromosome	2230018-2252077
GCA_021365485.1	Erwinia_tracheiphila_SCR3	50.49	20	incomplete	25.1	49.83	CP0899341_tracheiphila_strain_SCR3_chromosome	2594634-2619756
GCA_000773975.1	Erwinia_typographi_M043b	54.97	11	incomplete	15.9	54.83	JRUQ010000081_typographi_strain_M043b_Contig8	29507-45441
GCA_000773975.1	Erwinia_typographi_M043b	54.97	9	intact	39.9	51.71	JRUQ010000761_typographi_strain_M043b_Contig76	15283-55184
GCA_000773975.1	Erwinia_typographi_M043b	54.97	2	incomplete	33.1	53.28	JRUQ010000181_typographi_strain_M043b_Contig18	49591-82690
GCA_000773975.1	Erwinia_typographi_M043b	54.97	5	incomplete	13.5	53.63	JRUQ010000401_typographi_strain_M043b_Contig40	178758-192308
GCA_000773975.1	Erwinia_typographi_M043b	54.97	1	intact	19.2	53.32	JRUQ010001051_typographi_strain_M043b_Contig105	3-19260
GCA_000773975.1	Erwinia_typographi_M043b	54.97	4	incomplete	19.4	50.87	JRUQ010000291_typographi_strain_M043b_Contig29	133406-152876
GCA_000773975.1	Erwinia_typographi_M043b	54.97	8	incomplete	6.4	43.74	JRUQ010000671_typographi_strain_M043b_Contig67	8632-15112
GCA_000773975.1	Erwinia_typographi_M043b	54.97	6	incomplete	12.2	53.4	JRUQ010000561_typographi_strain_M043b_Contig56	16964-29260
GCA_000773975.1	Erwinia_typographi_M043b	54.97	3	intact	36.2	57.07	JRUQ010000181_typographi_strain_M043b_Contig18	89821-126087
GCA_000773975.1	Erwinia_typographi_M043b	54.97	7	questionable	16.3	51.51	JRUQ010000621_typographi_strain_M043b_Contig62	38665-55031
GCA_000773975.1	Erwinia_typographi_M043b	54.97	10	incomplete	7	52.45	JRUQ010000781_typographi_strain_M043b_Contig78	508-7561
