# Supplementary material for: Genomic Analysis Unveils the Pervasiveness and Diversity of Prophages Infecting Erwinia Species
Source: Pathogens. 2022 Dec 27;12(1):44. doi: 10.3390/pathogens12010044 (PMC9866893; doi:10.3390/pathogens12010044)
Supplement: Supplementary file 1 [file pathogens-12-00044-s001.zip › Table_S11 - tabela_stitles_espacadores_crispr.xlsx]

## Sheet: tabela_stitles_espacadores_cris
Table S11. CRISPR spacers showing significant BLASTn hits (>95% identity and coverage) to plasmid and viruses sequences from databases.
CRISPR spacers from	ID assembly (Erwinia)	Stitle (subject title) of the BLASTn best hit
Erwinia_tasmaniensis_ET1_99	GCA_000026185.1	FQ482085.1 Erwinia tasmaniensis phage phiEt88 complete genome
Erwinia_tasmaniensis_ET1_99	GCA_000026185.1	NZ_CP028352.1 Pantoea vagans strain PV989 plasmid pPV989-94, complete sequence
Erwinia_tasmaniensis_ET1_99	GCA_000026185.1	BK031298.1 TPA_asm: Myoviridae sp. isolate ctwrk3, partial genome
Erwinia_tasmaniensis_ET1_99	GCA_000026185.1	IMGVR_UViG_3300011888_000009
Erwinia_tasmaniensis_ET1_99	GCA_000026185.1	MN602881.1 Erwinia phage Midgardsormr38, complete genome
Erwinia_pyrifoliae_DSM_12163	GCA_000026985.1	FQ482085.1 Erwinia tasmaniensis phage phiEt88 complete genome
Erwinia_pyrifoliae_DSM_12163	GCA_000026985.1	FQ482085.1 Erwinia tasmaniensis phage phiEt88 complete genome
Erwinia_pyrifoliae_DSM_12163	GCA_000026985.1	CP017585.1 Pantoea stewartii subsp. stewartii DC283 plasmid pDSJ04, complete sequence
Erwinia_pyrifoliae_DSM_12163	GCA_000026985.1	NZ_PEHF01000101.1 Candidatus Symbiopectobacterium sp. 'North America' plasmid unnamed1, whole genome shotgun sequence
Erwinia_pyrifoliae_DSM_12163	GCA_000026985.1	CM016898.1 Klebsiella pneumoniae subsp. pneumoniae strain KPCTRSRTH06 plasmid unnamed2, complete sequence, whole genome shotgun sequence
Erwinia_pyrifoliae_DSM_12163	GCA_000026985.1	NZ_CP030267.1 Klebsiella pneumoniae subsp. pneumoniae strain SC-7 plasmid pSC7-KPC, complete sequence
Erwinia_pyrifoliae_DSM_12163	GCA_000026985.1	CP052480.1 Klebsiella pneumoniae strain C16KP0050 plasmid pC16KP0050-4, complete sequence
Erwinia_amylovora_ATCC_49946	GCA_000027205.1	NC_011148.1 Salmonella enterica subsp. enterica serovar Agona str. SL483 plasmid unnamed, complete sequence
Erwinia_amylovora_ATCC_49946	GCA_000027205.1	NZ_CP030267.1 Klebsiella pneumoniae subsp. pneumoniae strain SC-7 plasmid pSC7-KPC, complete sequence
Erwinia_amylovora_ATCC_49946	GCA_000027205.1	NZ_CP028352.1 Pantoea vagans strain PV989 plasmid pPV989-94, complete sequence
Erwinia_amylovora_ATCC_49946	GCA_000027205.1	FQ482085.1 Erwinia tasmaniensis phage phiEt88 complete genome
Erwinia_amylovora_ATCC_49946	GCA_000027205.1	NZ_CP030267.1 Klebsiella pneumoniae subsp. pneumoniae strain SC-7 plasmid pSC7-KPC, complete sequence
Erwinia_amylovora_ATCC_49946	GCA_000027205.1	CU468130.1 Erwinia tasmaniensis strain ET1/99 complete plasmid pET35
Erwinia_amylovora_ATCC_49946	GCA_000027205.1	NZ_JAAEWH010000049.1 Erwinia amylovora strain Ea01-03 plasmid pEU30, whole genome shotgun sequence
Erwinia_amylovora_ATCC_49946	GCA_000027205.1	CU468130.1 Erwinia tasmaniensis strain ET1/99 complete plasmid pET35
Erwinia_amylovora_ATCC_49946	GCA_000027205.1	IMGVR_UViG_3300031420_000044
Erwinia_amylovora_ATCC_49946	GCA_000027205.1	NZ_CP030267.1 Klebsiella pneumoniae subsp. pneumoniae strain SC-7 plasmid pSC7-KPC, complete sequence
Erwinia_amylovora_ATCC_49946	GCA_000027205.1	BK049330.1 TPA_asm: Myoviridae sp. isolate ct8vj1, partial genome
Erwinia_amylovora_ATCC_49946	GCA_000027205.1	CU468130.1 Erwinia tasmaniensis strain ET1/99 complete plasmid pET35
Erwinia_amylovora_ATCC_49946	GCA_000027205.1	NC_005814.1 Yersinia pestis biovar Microtus str. 91001 plasmid pCRY, complete sequence
Erwinia_amylovora_ATCC_49946	GCA_000027205.1	NZ_JAAEWH010000068.1 Erwinia amylovora strain Ea01-03 plasmid pEA4.0, whole genome shotgun sequence
Erwinia_amylovora_ATCC_49946	GCA_000027205.1	KJ685892.1 Salmonella enterica subsp. enterica serovar Hadar strain 139.67 plasmid KVHS-004 plasmid mediated quinolone resistance protein (qnrD1) and regulator protein (rop) genes, complete cds
Erwinia_pyrifoliae_Ep1_96	GCA_000027265.1	CP017585.1 Pantoea stewartii subsp. stewartii DC283 plasmid pDSJ04, complete sequence
Erwinia_pyrifoliae_Ep1_96	GCA_000027265.1	FQ482085.1 Erwinia tasmaniensis phage phiEt88 complete genome
Erwinia_pyrifoliae_Ep1_96	GCA_000027265.1	NZ_PEHF01000101.1 Candidatus Symbiopectobacterium sp. 'North America' plasmid unnamed1, whole genome shotgun sequence
Erwinia_pyrifoliae_Ep1_96	GCA_000027265.1	NZ_CP030267.1 Klebsiella pneumoniae subsp. pneumoniae strain SC-7 plasmid pSC7-KPC, complete sequence
Erwinia_pyrifoliae_Ep1_96	GCA_000027265.1	CM016898.1 Klebsiella pneumoniae subsp. pneumoniae strain KPCTRSRTH06 plasmid unnamed2, complete sequence, whole genome shotgun sequence
Erwinia_pyrifoliae_Ep1_96	GCA_000027265.1	FQ482085.1 Erwinia tasmaniensis phage phiEt88 complete genome
Erwinia_pyrifoliae_Ep1_96	GCA_000027265.1	CP052480.1 Klebsiella pneumoniae strain C16KP0050 plasmid pC16KP0050-4, complete sequence
Erwinia_amylovora_CFBP1430	GCA_000091565.1	NC_011148.1 Salmonella enterica subsp. enterica serovar Agona str. SL483 plasmid unnamed, complete sequence
Erwinia_amylovora_CFBP1430	GCA_000091565.1	BK049330.1 TPA_asm: Myoviridae sp. isolate ct8vj1, partial genome
Erwinia_amylovora_CFBP1430	GCA_000091565.1	NZ_CP030267.1 Klebsiella pneumoniae subsp. pneumoniae strain SC-7 plasmid pSC7-KPC, complete sequence
Erwinia_amylovora_CFBP1430	GCA_000091565.1	NZ_JAAEWB010000012.1 Erwinia amylovora strain Ea12 plasmid pEU30, whole genome shotgun sequence
Erwinia_amylovora_CFBP1430	GCA_000091565.1	NZ_CP028352.1 Pantoea vagans strain PV989 plasmid pPV989-94, complete sequence
Erwinia_amylovora_CFBP1430	GCA_000091565.1	NZ_JAAEWR010000012.1 Erwinia amylovora strain 39-I-II plasmid pEA72, whole genome shotgun sequence
Erwinia_amylovora_CFBP1430	GCA_000091565.1	KJ685892.1 Salmonella enterica subsp. enterica serovar Hadar strain 139.67 plasmid KVHS-004 plasmid mediated quinolone resistance protein (qnrD1) and regulator protein (rop) genes, complete cds
Erwinia_amylovora_CFBP1430	GCA_000091565.1	FQ482085.1 Erwinia tasmaniensis phage phiEt88 complete genome
Erwinia_amylovora_CFBP1430	GCA_000091565.1	CU468130.1 Erwinia tasmaniensis strain ET1/99 complete plasmid pET35
Erwinia_amylovora_CFBP1430	GCA_000091565.1	CU468130.1 Erwinia tasmaniensis strain ET1/99 complete plasmid pET35
Erwinia_amylovora_CFBP1430	GCA_000091565.1	NZ_CP030267.1 Klebsiella pneumoniae subsp. pneumoniae strain SC-7 plasmid pSC7-KPC, complete sequence
Erwinia_amylovora_CFBP1430	GCA_000091565.1	CU468130.1 Erwinia tasmaniensis strain ET1/99 complete plasmid pET35
Erwinia_amylovora_CFBP1430	GCA_000091565.1	NZ_CP030267.1 Klebsiella pneumoniae subsp. pneumoniae strain SC-7 plasmid pSC7-KPC, complete sequence
Erwinia_amylovora_CFBP1430	GCA_000091565.1	NZ_JAAEWH010000049.1 Erwinia amylovora strain Ea01-03 plasmid pEU30, whole genome shotgun sequence
Erwinia_amylovora_CFBP1430	GCA_000091565.1	IMGVR_UViG_3300031420_000044
Erwinia_amylovora_CFBP1430	GCA_000091565.1	NZ_JAAEWH010000068.1 Erwinia amylovora strain Ea01-03 plasmid pEA4.0, whole genome shotgun sequence
Erwinia_amylovora_CFBP1430	GCA_000091565.1	NC_005814.1 Yersinia pestis biovar Microtus str. 91001 plasmid pCRY, complete sequence
Erwinia_sp_Ejp617	GCA_000165815.1	AJJI01000025.1 Klebsiella pneumoniae subsp. pneumoniae DSM 30104 = JCM 1662 = NBRC 14940 strain DSM 30104 plasmid pKPt3 Contig00025, whole genome shotgun sequence
Erwinia_sp_Ejp617	GCA_000165815.1	NZ_CP022119.1 Salmonella enterica subsp. enterica serovar Macclesfield str. S-1643 plasmid unnamed2, complete sequence
Erwinia_sp_Ejp617	GCA_000165815.1	CM016898.1 Klebsiella pneumoniae subsp. pneumoniae strain KPCTRSRTH06 plasmid unnamed2, complete sequence, whole genome shotgun sequence
Erwinia_amylovora_ACW56400	GCA_000240705.2	NZ_JAAEWB010000012.1 Erwinia amylovora strain Ea12 plasmid pEU30, whole genome shotgun sequence
Erwinia_amylovora_ACW56400	GCA_000240705.2	KJ685892.1 Salmonella enterica subsp. enterica serovar Hadar strain 139.67 plasmid KVHS-004 plasmid mediated quinolone resistance protein (qnrD1) and regulator protein (rop) genes, complete cds
Erwinia_amylovora_ACW56400	GCA_000240705.2	IMGVR_UViG_3300031420_000044
Erwinia_amylovora_ACW56400	GCA_000240705.2	CU468130.1 Erwinia tasmaniensis strain ET1/99 complete plasmid pET35
Erwinia_amylovora_ACW56400	GCA_000240705.2	NZ_CP030267.1 Klebsiella pneumoniae subsp. pneumoniae strain SC-7 plasmid pSC7-KPC, complete sequence
Erwinia_amylovora_ACW56400	GCA_000240705.2	NZ_CP030267.1 Klebsiella pneumoniae subsp. pneumoniae strain SC-7 plasmid pSC7-KPC, complete sequence
Erwinia_amylovora_ACW56400	GCA_000240705.2	NZ_JAAEWH010000049.1 Erwinia amylovora strain Ea01-03 plasmid pEU30, whole genome shotgun sequence
Erwinia_amylovora_ACW56400	GCA_000240705.2	NC_011148.1 Salmonella enterica subsp. enterica serovar Agona str. SL483 plasmid unnamed, complete sequence
Erwinia_amylovora_ACW56400	GCA_000240705.2	BK049330.1 TPA_asm: Myoviridae sp. isolate ct8vj1, partial genome
Erwinia_amylovora_ACW56400	GCA_000240705.2	CU468130.1 Erwinia tasmaniensis strain ET1/99 complete plasmid pET35
Erwinia_amylovora_ACW56400	GCA_000240705.2	CU468130.1 Erwinia tasmaniensis strain ET1/99 complete plasmid pET35
Erwinia_amylovora_ACW56400	GCA_000240705.2	NZ_CP030267.1 Klebsiella pneumoniae subsp. pneumoniae strain SC-7 plasmid pSC7-KPC, complete sequence
Erwinia_amylovora_ACW56400	GCA_000240705.2	NC_005814.1 Yersinia pestis biovar Microtus str. 91001 plasmid pCRY, complete sequence
Erwinia_amylovora_ACW56400	GCA_000240705.2	NZ_JAAEWR010000012.1 Erwinia amylovora strain 39-I-II plasmid pEA72, whole genome shotgun sequence
Erwinia_amylovora_ACW56400	GCA_000240705.2	NZ_CP028352.1 Pantoea vagans strain PV989 plasmid pPV989-94, complete sequence
Erwinia_amylovora_ACW56400	GCA_000240705.2	FQ482085.1 Erwinia tasmaniensis phage phiEt88 complete genome
Erwinia_amylovora_ACW56400	GCA_000240705.2	NZ_JAAEWH010000068.1 Erwinia amylovora strain Ea01-03 plasmid pEA4.0, whole genome shotgun sequence
Erwinia_amylovora_Ea356	GCA_000367545.2	BK049330.1 TPA_asm: Myoviridae sp. isolate ct8vj1, partial genome
Erwinia_amylovora_Ea356	GCA_000367545.2	KJ685892.1 Salmonella enterica subsp. enterica serovar Hadar strain 139.67 plasmid KVHS-004 plasmid mediated quinolone resistance protein (qnrD1) and regulator protein (rop) genes, complete cds
Erwinia_amylovora_Ea356	GCA_000367545.2	NZ_CP030267.1 Klebsiella pneumoniae subsp. pneumoniae strain SC-7 plasmid pSC7-KPC, complete sequence
Erwinia_amylovora_Ea356	GCA_000367545.2	NZ_JAAEWH010000049.1 Erwinia amylovora strain Ea01-03 plasmid pEU30, whole genome shotgun sequence
Erwinia_amylovora_Ea356	GCA_000367545.2	NZ_CP030267.1 Klebsiella pneumoniae subsp. pneumoniae strain SC-7 plasmid pSC7-KPC, complete sequence
Erwinia_amylovora_Ea356	GCA_000367545.2	NZ_JAAEWB010000012.1 Erwinia amylovora strain Ea12 plasmid pEU30, whole genome shotgun sequence
Erwinia_amylovora_Ea356	GCA_000367545.2	NC_011148.1 Salmonella enterica subsp. enterica serovar Agona str. SL483 plasmid unnamed, complete sequence
Erwinia_amylovora_Ea356	GCA_000367545.2	IMGVR_UViG_3300031420_000044
Erwinia_amylovora_Ea356	GCA_000367545.2	CU468130.1 Erwinia tasmaniensis strain ET1/99 complete plasmid pET35
Erwinia_amylovora_Ea356	GCA_000367545.2	NZ_JAAEWR010000012.1 Erwinia amylovora strain 39-I-II plasmid pEA72, whole genome shotgun sequence
Erwinia_amylovora_Ea356	GCA_000367545.2	CU468130.1 Erwinia tasmaniensis strain ET1/99 complete plasmid pET35
Erwinia_amylovora_Ea356	GCA_000367545.2	NZ_JAAEWH010000068.1 Erwinia amylovora strain Ea01-03 plasmid pEA4.0, whole genome shotgun sequence
Erwinia_amylovora_Ea356	GCA_000367545.2	FQ482085.1 Erwinia tasmaniensis phage phiEt88 complete genome
Erwinia_amylovora_Ea356	GCA_000367545.2	CU468130.1 Erwinia tasmaniensis strain ET1/99 complete plasmid pET35
Erwinia_amylovora_Ea356	GCA_000367545.2	NZ_CP030267.1 Klebsiella pneumoniae subsp. pneumoniae strain SC-7 plasmid pSC7-KPC, complete sequence
Erwinia_amylovora_Ea356	GCA_000367545.2	NZ_CP028352.1 Pantoea vagans strain PV989 plasmid pPV989-94, complete sequence
Erwinia_amylovora_Ea266	GCA_000367565.2	CU468130.1 Erwinia tasmaniensis strain ET1/99 complete plasmid pET35
Erwinia_amylovora_Ea266	GCA_000367565.2	CU468130.1 Erwinia tasmaniensis strain ET1/99 complete plasmid pET35
Erwinia_amylovora_Ea266	GCA_000367565.2	NZ_CP030267.1 Klebsiella pneumoniae subsp. pneumoniae strain SC-7 plasmid pSC7-KPC, complete sequence
Erwinia_amylovora_Ea266	GCA_000367565.2	NZ_CP030267.1 Klebsiella pneumoniae subsp. pneumoniae strain SC-7 plasmid pSC7-KPC, complete sequence
Erwinia_amylovora_Ea266	GCA_000367565.2	NZ_JAAEWH010000068.1 Erwinia amylovora strain Ea01-03 plasmid pEA4.0, whole genome shotgun sequence
Erwinia_amylovora_Ea266	GCA_000367565.2	IMGVR_UViG_3300031420_000044
Erwinia_amylovora_Ea266	GCA_000367565.2	NZ_JAAEWH010000049.1 Erwinia amylovora strain Ea01-03 plasmid pEU30, whole genome shotgun sequence
Erwinia_amylovora_Ea266	GCA_000367565.2	NZ_JAAEWR010000012.1 Erwinia amylovora strain 39-I-II plasmid pEA72, whole genome shotgun sequence
Erwinia_amylovora_Ea266	GCA_000367565.2	KJ685892.1 Salmonella enterica subsp. enterica serovar Hadar strain 139.67 plasmid KVHS-004 plasmid mediated quinolone resistance protein (qnrD1) and regulator protein (rop) genes, complete cds
Erwinia_amylovora_Ea266	GCA_000367565.2	NC_011148.1 Salmonella enterica subsp. enterica serovar Agona str. SL483 plasmid unnamed, complete sequence
Erwinia_amylovora_CFBP_2585	GCA_000367585.2	FQ482085.1 Erwinia tasmaniensis phage phiEt88 complete genome
Erwinia_amylovora_CFBP_2585	GCA_000367585.2	NZ_JAAEWH010000068.1 Erwinia amylovora strain Ea01-03 plasmid pEA4.0, whole genome shotgun sequence
Erwinia_amylovora_CFBP_2585	GCA_000367585.2	CU468130.1 Erwinia tasmaniensis strain ET1/99 complete plasmid pET35
Erwinia_amylovora_CFBP_2585	GCA_000367585.2	NZ_CP030267.1 Klebsiella pneumoniae subsp. pneumoniae strain SC-7 plasmid pSC7-KPC, complete sequence
Erwinia_amylovora_CFBP_2585	GCA_000367585.2	NZ_JAAEWR010000012.1 Erwinia amylovora strain 39-I-II plasmid pEA72, whole genome shotgun sequence
Erwinia_amylovora_CFBP_2585	GCA_000367585.2	NZ_JAAEWB010000012.1 Erwinia amylovora strain Ea12 plasmid pEU30, whole genome shotgun sequence
Erwinia_amylovora_CFBP_2585	GCA_000367585.2	IMGVR_UViG_3300031420_000044
Erwinia_amylovora_CFBP_2585	GCA_000367585.2	NC_011148.1 Salmonella enterica subsp. enterica serovar Agona str. SL483 plasmid unnamed, complete sequence
Erwinia_amylovora_CFBP_2585	GCA_000367585.2	CU468130.1 Erwinia tasmaniensis strain ET1/99 complete plasmid pET35
Erwinia_amylovora_CFBP_2585	GCA_000367585.2	NC_005814.1 Yersinia pestis biovar Microtus str. 91001 plasmid pCRY, complete sequence
Erwinia_amylovora_CFBP_2585	GCA_000367585.2	BK049330.1 TPA_asm: Myoviridae sp. isolate ct8vj1, partial genome
Erwinia_amylovora_CFBP_2585	GCA_000367585.2	NZ_CP030267.1 Klebsiella pneumoniae subsp. pneumoniae strain SC-7 plasmid pSC7-KPC, complete sequence
Erwinia_amylovora_CFBP_2585	GCA_000367585.2	CU468130.1 Erwinia tasmaniensis strain ET1/99 complete plasmid pET35
Erwinia_amylovora_CFBP_2585	GCA_000367585.2	KJ685892.1 Salmonella enterica subsp. enterica serovar Hadar strain 139.67 plasmid KVHS-004 plasmid mediated quinolone resistance protein (qnrD1) and regulator protein (rop) genes, complete cds
Erwinia_amylovora_CFBP_2585	GCA_000367585.2	NZ_CP030267.1 Klebsiella pneumoniae subsp. pneumoniae strain SC-7 plasmid pSC7-KPC, complete sequence
Erwinia_amylovora_CFBP_2585	GCA_000367585.2	NZ_CP028352.1 Pantoea vagans strain PV989 plasmid pPV989-94, complete sequence
Erwinia_amylovora_01SFR_BO	GCA_000367605.2	CU468130.1 Erwinia tasmaniensis strain ET1/99 complete plasmid pET35
Erwinia_amylovora_01SFR_BO	GCA_000367605.2	NZ_CP030267.1 Klebsiella pneumoniae subsp. pneumoniae strain SC-7 plasmid pSC7-KPC, complete sequence
Erwinia_amylovora_01SFR_BO	GCA_000367605.2	NZ_JAAEWH010000068.1 Erwinia amylovora strain Ea01-03 plasmid pEA4.0, whole genome shotgun sequence
Erwinia_amylovora_01SFR_BO	GCA_000367605.2	IMGVR_UViG_3300031420_000044
Erwinia_amylovora_01SFR_BO	GCA_000367605.2	NZ_CP028352.1 Pantoea vagans strain PV989 plasmid pPV989-94, complete sequence
Erwinia_amylovora_01SFR_BO	GCA_000367605.2	NC_005814.1 Yersinia pestis biovar Microtus str. 91001 plasmid pCRY, complete sequence
Erwinia_amylovora_01SFR_BO	GCA_000367605.2	FQ482085.1 Erwinia tasmaniensis phage phiEt88 complete genome
Erwinia_amylovora_01SFR_BO	GCA_000367605.2	CU468130.1 Erwinia tasmaniensis strain ET1/99 complete plasmid pET35
Erwinia_amylovora_01SFR_BO	GCA_000367605.2	CU468130.1 Erwinia tasmaniensis strain ET1/99 complete plasmid pET35
Erwinia_amylovora_01SFR_BO	GCA_000367605.2	NZ_JAAEWB010000012.1 Erwinia amylovora strain Ea12 plasmid pEU30, whole genome shotgun sequence
Erwinia_amylovora_01SFR_BO	GCA_000367605.2	NZ_CP030267.1 Klebsiella pneumoniae subsp. pneumoniae strain SC-7 plasmid pSC7-KPC, complete sequence
Erwinia_amylovora_01SFR_BO	GCA_000367605.2	NC_011148.1 Salmonella enterica subsp. enterica serovar Agona str. SL483 plasmid unnamed, complete sequence
Erwinia_amylovora_01SFR_BO	GCA_000367605.2	NZ_JAAEWR010000012.1 Erwinia amylovora strain 39-I-II plasmid pEA72, whole genome shotgun sequence
Erwinia_amylovora_01SFR_BO	GCA_000367605.2	KJ685892.1 Salmonella enterica subsp. enterica serovar Hadar strain 139.67 plasmid KVHS-004 plasmid mediated quinolone resistance protein (qnrD1) and regulator protein (rop) genes, complete cds
Erwinia_amylovora_01SFR_BO	GCA_000367605.2	NZ_CP030267.1 Klebsiella pneumoniae subsp. pneumoniae strain SC-7 plasmid pSC7-KPC, complete sequence
Erwinia_amylovora_01SFR_BO	GCA_000367605.2	NZ_JAAEWH010000049.1 Erwinia amylovora strain Ea01-03 plasmid pEU30, whole genome shotgun sequence
Erwinia_amylovora_01SFR_BO	GCA_000367605.2	BK049330.1 TPA_asm: Myoviridae sp. isolate ct8vj1, partial genome
Erwinia_amylovora_CFBP_1232	GCA_000367625.2	IMGVR_UViG_3300031420_000044
Erwinia_amylovora_CFBP_1232	GCA_000367625.2	BK049330.1 TPA_asm: Myoviridae sp. isolate ct8vj1, partial genome
Erwinia_amylovora_CFBP_1232	GCA_000367625.2	NC_005814.1 Yersinia pestis biovar Microtus str. 91001 plasmid pCRY, complete sequence
Erwinia_amylovora_CFBP_1232	GCA_000367625.2	CU468130.1 Erwinia tasmaniensis strain ET1/99 complete plasmid pET35
Erwinia_amylovora_CFBP_1232	GCA_000367625.2	NZ_CP030267.1 Klebsiella pneumoniae subsp. pneumoniae strain SC-7 plasmid pSC7-KPC, complete sequence
Erwinia_amylovora_CFBP_1232	GCA_000367625.2	CU468130.1 Erwinia tasmaniensis strain ET1/99 complete plasmid pET35
Erwinia_amylovora_CFBP_1232	GCA_000367625.2	NZ_JAAEWH010000068.1 Erwinia amylovora strain Ea01-03 plasmid pEA4.0, whole genome shotgun sequence
Erwinia_amylovora_CFBP_1232	GCA_000367625.2	FQ482085.1 Erwinia tasmaniensis phage phiEt88 complete genome
Erwinia_amylovora_CFBP_1232	GCA_000367625.2	NZ_CP030267.1 Klebsiella pneumoniae subsp. pneumoniae strain SC-7 plasmid pSC7-KPC, complete sequence
Erwinia_amylovora_CFBP_1232	GCA_000367625.2	KJ685892.1 Salmonella enterica subsp. enterica serovar Hadar strain 139.67 plasmid KVHS-004 plasmid mediated quinolone resistance protein (qnrD1) and regulator protein (rop) genes, complete cds
Erwinia_amylovora_CFBP_1232	GCA_000367625.2	NZ_CP030267.1 Klebsiella pneumoniae subsp. pneumoniae strain SC-7 plasmid pSC7-KPC, complete sequence
Erwinia_amylovora_CFBP_1232	GCA_000367625.2	CU468130.1 Erwinia tasmaniensis strain ET1/99 complete plasmid pET35
Erwinia_amylovora_CFBP_1232	GCA_000367625.2	NZ_CP028352.1 Pantoea vagans strain PV989 plasmid pPV989-94, complete sequence
Erwinia_amylovora_CFBP_1232	GCA_000367625.2	NZ_JAAEWH010000049.1 Erwinia amylovora strain Ea01-03 plasmid pEU30, whole genome shotgun sequence
Erwinia_amylovora_CFBP_1232	GCA_000367625.2	NC_011148.1 Salmonella enterica subsp. enterica serovar Agona str. SL483 plasmid unnamed, complete sequence
Erwinia_amylovora_UPN527	GCA_000367645.1	IMGVR_UViG_3300031420_000044
Erwinia_amylovora_UPN527	GCA_000367645.1	FQ482085.1 Erwinia tasmaniensis phage phiEt88 complete genome
Erwinia_amylovora_UPN527	GCA_000367645.1	NZ_CP030267.1 Klebsiella pneumoniae subsp. pneumoniae strain SC-7 plasmid pSC7-KPC, complete sequence
Erwinia_amylovora_UPN527	GCA_000367645.1	NZ_JAAEWH010000049.1 Erwinia amylovora strain Ea01-03 plasmid pEU30, whole genome shotgun sequence
Erwinia_amylovora_UPN527	GCA_000367645.1	NZ_CP028352.1 Pantoea vagans strain PV989 plasmid pPV989-94, complete sequence
Erwinia_amylovora_UPN527	GCA_000367645.1	NC_005814.1 Yersinia pestis biovar Microtus str. 91001 plasmid pCRY, complete sequence
Erwinia_amylovora_UPN527	GCA_000367645.1	NZ_JAAEWH010000068.1 Erwinia amylovora strain Ea01-03 plasmid pEA4.0, whole genome shotgun sequence
Erwinia_amylovora_UPN527	GCA_000367645.1	BK049330.1 TPA_asm: Myoviridae sp. isolate ct8vj1, partial genome
Erwinia_amylovora_UPN527	GCA_000367645.1	CU468130.1 Erwinia tasmaniensis strain ET1/99 complete plasmid pET35
Erwinia_amylovora_UPN527	GCA_000367645.1	KJ685892.1 Salmonella enterica subsp. enterica serovar Hadar strain 139.67 plasmid KVHS-004 plasmid mediated quinolone resistance protein (qnrD1) and regulator protein (rop) genes, complete cds
Erwinia_amylovora_UPN527	GCA_000367645.1	CU468130.1 Erwinia tasmaniensis strain ET1/99 complete plasmid pET35
Erwinia_amylovora_UPN527	GCA_000367645.1	NZ_JAAEWR010000012.1 Erwinia amylovora strain 39-I-II plasmid pEA72, whole genome shotgun sequence
Erwinia_amylovora_UPN527	GCA_000367645.1	NZ_JAAEWB010000012.1 Erwinia amylovora strain Ea12 plasmid pEU30, whole genome shotgun sequence
Erwinia_amylovora_UPN527	GCA_000367645.1	NC_011148.1 Salmonella enterica subsp. enterica serovar Agona str. SL483 plasmid unnamed, complete sequence
Erwinia_amylovora_UPN527	GCA_000367645.1	CU468130.1 Erwinia tasmaniensis strain ET1/99 complete plasmid pET35
Erwinia_amylovora_UPN527	GCA_000367645.1	NZ_CP030267.1 Klebsiella pneumoniae subsp. pneumoniae strain SC-7 plasmid pSC7-KPC, complete sequence
Erwinia_amylovora_UPN527	GCA_000367645.1	NZ_CP030267.1 Klebsiella pneumoniae subsp. pneumoniae strain SC-7 plasmid pSC7-KPC, complete sequence
Erwinia_amylovora_Ea644	GCA_000367665.2	CP013971.1 Erwinia tracheiphila strain MDcuke plasmid unnamed1, complete sequence
Erwinia_amylovora_Ea644	GCA_000367665.2	NZ_JAAEWR010000012.1 Erwinia amylovora strain 39-I-II plasmid pEA72, whole genome shotgun sequence
Erwinia_amylovora_Ea644	GCA_000367665.2	NZ_HG813238.1 Erwinia amylovora strain 692 plasmid II, complete sequence
Erwinia_amylovora_Ea644	GCA_000367665.2	BK057436.1 TPA_asm: Myoviridae sp. isolate ctGdI15, partial genome
Erwinia_amylovora_Ea644	GCA_000367665.2	NZ_JAAEWH010000049.1 Erwinia amylovora strain Ea01-03 plasmid pEU30, whole genome shotgun sequence
Erwinia_amylovora_Ea644	GCA_000367665.2	IMGVR_UViG_3300031134_000061
Erwinia_amylovora_Ea644	GCA_000367665.2	NZ_CP030267.1 Klebsiella pneumoniae subsp. pneumoniae strain SC-7 plasmid pSC7-KPC, complete sequence
Erwinia_amylovora_LA637	GCA_000513355.1	NC_011148.1 Salmonella enterica subsp. enterica serovar Agona str. SL483 plasmid unnamed, complete sequence
Erwinia_amylovora_LA637	GCA_000513355.1	NZ_JAAEWH010000049.1 Erwinia amylovora strain Ea01-03 plasmid pEU30, whole genome shotgun sequence
Erwinia_amylovora_LA637	GCA_000513355.1	CU468130.1 Erwinia tasmaniensis strain ET1/99 complete plasmid pET35
Erwinia_amylovora_LA637	GCA_000513355.1	NZ_JAAEWH010000068.1 Erwinia amylovora strain Ea01-03 plasmid pEA4.0, whole genome shotgun sequence
Erwinia_amylovora_LA637	GCA_000513355.1	KJ685892.1 Salmonella enterica subsp. enterica serovar Hadar strain 139.67 plasmid KVHS-004 plasmid mediated quinolone resistance protein (qnrD1) and regulator protein (rop) genes, complete cds
Erwinia_amylovora_LA637	GCA_000513355.1	FQ482085.1 Erwinia tasmaniensis phage phiEt88 complete genome
Erwinia_amylovora_LA637	GCA_000513355.1	CU468130.1 Erwinia tasmaniensis strain ET1/99 complete plasmid pET35
Erwinia_amylovora_LA637	GCA_000513355.1	NZ_JAAEWR010000012.1 Erwinia amylovora strain 39-I-II plasmid pEA72, whole genome shotgun sequence
Erwinia_amylovora_LA637	GCA_000513355.1	NZ_CP030267.1 Klebsiella pneumoniae subsp. pneumoniae strain SC-7 plasmid pSC7-KPC, complete sequence
Erwinia_amylovora_LA637	GCA_000513355.1	NZ_JAAEWB010000012.1 Erwinia amylovora strain Ea12 plasmid pEU30, whole genome shotgun sequence
Erwinia_amylovora_LA637	GCA_000513355.1	NZ_CP030267.1 Klebsiella pneumoniae subsp. pneumoniae strain SC-7 plasmid pSC7-KPC, complete sequence
Erwinia_amylovora_LA637	GCA_000513355.1	NZ_CP030267.1 Klebsiella pneumoniae subsp. pneumoniae strain SC-7 plasmid pSC7-KPC, complete sequence
Erwinia_amylovora_LA636	GCA_000513395.1	KJ685892.1 Salmonella enterica subsp. enterica serovar Hadar strain 139.67 plasmid KVHS-004 plasmid mediated quinolone resistance protein (qnrD1) and regulator protein (rop) genes, complete cds
Erwinia_amylovora_LA636	GCA_000513395.1	NZ_JAAEWB010000012.1 Erwinia amylovora strain Ea12 plasmid pEU30, whole genome shotgun sequence
Erwinia_amylovora_LA636	GCA_000513395.1	NZ_CP030267.1 Klebsiella pneumoniae subsp. pneumoniae strain SC-7 plasmid pSC7-KPC, complete sequence
Erwinia_amylovora_LA636	GCA_000513395.1	CU468130.1 Erwinia tasmaniensis strain ET1/99 complete plasmid pET35
Erwinia_amylovora_LA636	GCA_000513395.1	NZ_JAAEWH010000049.1 Erwinia amylovora strain Ea01-03 plasmid pEU30, whole genome shotgun sequence
Erwinia_amylovora_LA636	GCA_000513395.1	NZ_CP030267.1 Klebsiella pneumoniae subsp. pneumoniae strain SC-7 plasmid pSC7-KPC, complete sequence
Erwinia_amylovora_LA636	GCA_000513395.1	NZ_CP030267.1 Klebsiella pneumoniae subsp. pneumoniae strain SC-7 plasmid pSC7-KPC, complete sequence
Erwinia_amylovora_LA636	GCA_000513395.1	CU468130.1 Erwinia tasmaniensis strain ET1/99 complete plasmid pET35
Erwinia_amylovora_LA636	GCA_000513395.1	NZ_JAAEWR010000012.1 Erwinia amylovora strain 39-I-II plasmid pEA72, whole genome shotgun sequence
Erwinia_amylovora_LA636	GCA_000513395.1	NZ_JAAEWH010000068.1 Erwinia amylovora strain Ea01-03 plasmid pEA4.0, whole genome shotgun sequence
Erwinia_amylovora_LA636	GCA_000513395.1	FQ482085.1 Erwinia tasmaniensis phage phiEt88 complete genome
Erwinia_amylovora_LA636	GCA_000513395.1	NC_011148.1 Salmonella enterica subsp. enterica serovar Agona str. SL483 plasmid unnamed, complete sequence
Erwinia_amylovora_LA635	GCA_000513415.1	FQ482085.1 Erwinia tasmaniensis phage phiEt88 complete genome
Erwinia_amylovora_LA635	GCA_000513415.1	NC_011148.1 Salmonella enterica subsp. enterica serovar Agona str. SL483 plasmid unnamed, complete sequence
Erwinia_amylovora_LA635	GCA_000513415.1	NZ_JAAEWH010000068.1 Erwinia amylovora strain Ea01-03 plasmid pEA4.0, whole genome shotgun sequence
Erwinia_amylovora_LA635	GCA_000513415.1	NZ_CP030267.1 Klebsiella pneumoniae subsp. pneumoniae strain SC-7 plasmid pSC7-KPC, complete sequence
Erwinia_amylovora_LA635	GCA_000513415.1	NZ_JAAEWR010000012.1 Erwinia amylovora strain 39-I-II plasmid pEA72, whole genome shotgun sequence
Erwinia_amylovora_LA635	GCA_000513415.1	NZ_JAAEWB010000012.1 Erwinia amylovora strain Ea12 plasmid pEU30, whole genome shotgun sequence
Erwinia_amylovora_LA635	GCA_000513415.1	KJ685892.1 Salmonella enterica subsp. enterica serovar Hadar strain 139.67 plasmid KVHS-004 plasmid mediated quinolone resistance protein (qnrD1) and regulator protein (rop) genes, complete cds
Erwinia_amylovora_LA635	GCA_000513415.1	CU468130.1 Erwinia tasmaniensis strain ET1/99 complete plasmid pET35
Erwinia_amylovora_LA635	GCA_000513415.1	CU468130.1 Erwinia tasmaniensis strain ET1/99 complete plasmid pET35
Erwinia_amylovora_LA635	GCA_000513415.1	NZ_CP030267.1 Klebsiella pneumoniae subsp. pneumoniae strain SC-7 plasmid pSC7-KPC, complete sequence
Erwinia_amylovora_LA635	GCA_000513415.1	NZ_JAAEWH010000049.1 Erwinia amylovora strain Ea01-03 plasmid pEU30, whole genome shotgun sequence
Erwinia_amylovora_LA635	GCA_000513415.1	NZ_CP030267.1 Klebsiella pneumoniae subsp. pneumoniae strain SC-7 plasmid pSC7-KPC, complete sequence
Erwinia_mallotivora_BT_MARDI	GCA_000590885.1	CP082344.1 Pantoea dispersa strain AHKW2b plasmid pAHKW2b.2, complete sequence
Erwinia_mallotivora_BT_MARDI	GCA_000590885.1	CP067259.1 Klebsiella pneumoniae strain ESBL_DR09 plasmid pESBL_DR09d, complete sequence
Erwinia_mallotivora_BT_MARDI	GCA_000590885.1	CP050856.1 Serratia symbiotica strain CWBI-2.3 plasmid pSsAf2.3-1, complete sequence
Erwinia_mallotivora_BT_MARDI	GCA_000590885.1	CP022140.1 Salmonella enterica subsp. salamae serovar 55:k:z39 str. 1315K plasmid unnamed1, complete sequence
Erwinia_oleae_DAPP_PG531	GCA_000770305.1	MZ501269.1 Pantoea phage AH01, complete genome
Erwinia_oleae_DAPP_PG531	GCA_000770305.1	MK214385.1 Salmonella phage TS6, complete genome
Erwinia_oleae_DAPP_PG531	GCA_000770305.1	BK029822.1 TPA_asm: Siphoviridae sp. isolate ctTyS5, partial genome
Erwinia_oleae_DAPP_PG531	GCA_000770305.1	BK015327.1 TPA_asm: Myoviridae sp. ctfOA1, partial genome
Erwinia_piriflorinigrans_CFBP_5888	GCA_001050515.1	MN856035.1 Bacteriophage sp. isolate 250, complete genome
Erwinia_piriflorinigrans_CFBP_5888	GCA_001050515.1	FQ482085.1 Erwinia tasmaniensis phage phiEt88 complete genome
Erwinia_amylovora_VTDMSF02	GCA_002732125.1	BK049330.1 TPA_asm: Myoviridae sp. isolate ct8vj1, partial genome
Erwinia_amylovora_VTDMSF02	GCA_002732125.1	NZ_JAAEWB010000012.1 Erwinia amylovora strain Ea12 plasmid pEU30, whole genome shotgun sequence
Erwinia_amylovora_VTDMSF02	GCA_002732125.1	NZ_CP030267.1 Klebsiella pneumoniae subsp. pneumoniae strain SC-7 plasmid pSC7-KPC, complete sequence
Erwinia_amylovora_VTDMSF02	GCA_002732125.1	NZ_JAAEWH010000049.1 Erwinia amylovora strain Ea01-03 plasmid pEU30, whole genome shotgun sequence
Erwinia_amylovora_VTDMSF02	GCA_002732125.1	NZ_JAAEWB010000012.1 Erwinia amylovora strain Ea12 plasmid pEU30, whole genome shotgun sequence
Erwinia_amylovora_VTDMSF02	GCA_002732125.1	NZ_JAAEWH010000049.1 Erwinia amylovora strain Ea01-03 plasmid pEU30, whole genome shotgun sequence
Erwinia_amylovora_VTDMSF02	GCA_002732125.1	NZ_JAAEWB010000012.1 Erwinia amylovora strain Ea12 plasmid pEU30, whole genome shotgun sequence
Erwinia_amylovora_VTDMSF02	GCA_002732125.1	NZ_JAAEWH010000068.1 Erwinia amylovora strain Ea01-03 plasmid pEA4.0, whole genome shotgun sequence
Erwinia_amylovora_VTDMSF02	GCA_002732125.1	NZ_JAAEWB010000012.1 Erwinia amylovora strain Ea12 plasmid pEU30, whole genome shotgun sequence
Erwinia_amylovora_VTDMSF02	GCA_002732125.1	NZ_CP030267.1 Klebsiella pneumoniae subsp. pneumoniae strain SC-7 plasmid pSC7-KPC, complete sequence
Erwinia_amylovora_VTDMSF02	GCA_002732125.1	NZ_JAAEWH010000049.1 Erwinia amylovora strain Ea01-03 plasmid pEU30, whole genome shotgun sequence
Erwinia_amylovora_VTDMSF02	GCA_002732125.1	NZ_JAAEWB010000012.1 Erwinia amylovora strain Ea12 plasmid pEU30, whole genome shotgun sequence
Erwinia_amylovora_VTDMSF02	GCA_002732125.1	NZ_JAAEWH010000049.1 Erwinia amylovora strain Ea01-03 plasmid pEU30, whole genome shotgun sequence
Erwinia_amylovora_VTDMSF02	GCA_002732125.1	NZ_JAAEWB010000012.1 Erwinia amylovora strain Ea12 plasmid pEU30, whole genome shotgun sequence
Erwinia_amylovora_VTDMSF02	GCA_002732125.1	NZ_JAAEWH010000049.1 Erwinia amylovora strain Ea01-03 plasmid pEU30, whole genome shotgun sequence
Erwinia_amylovora_VTDMSF02	GCA_002732125.1	NZ_JAAEWB010000012.1 Erwinia amylovora strain Ea12 plasmid pEU30, whole genome shotgun sequence
Erwinia_amylovora_VTDMSF02	GCA_002732125.1	NZ_JAAEWB010000012.1 Erwinia amylovora strain Ea12 plasmid pEU30, whole genome shotgun sequence
Erwinia_amylovora_VTDMSF02	GCA_002732125.1	NZ_JAAEWB010000012.1 Erwinia amylovora strain Ea12 plasmid pEU30, whole genome shotgun sequence
Erwinia_amylovora_VTDMSF02	GCA_002732125.1	NZ_JAAEWB010000012.1 Erwinia amylovora strain Ea12 plasmid pEU30, whole genome shotgun sequence
Erwinia_amylovora_VTDMSF02	GCA_002732125.1	NZ_JAAEWB010000012.1 Erwinia amylovora strain Ea12 plasmid pEU30, whole genome shotgun sequence
Erwinia_amylovora_VTDMSF02	GCA_002732125.1	NZ_JAAEWB010000012.1 Erwinia amylovora strain Ea12 plasmid pEU30, whole genome shotgun sequence
Erwinia_amylovora_VTDMSF02	GCA_002732125.1	NZ_JAAEWB010000012.1 Erwinia amylovora strain Ea12 plasmid pEU30, whole genome shotgun sequence
Erwinia_amylovora_VTDMSF02	GCA_002732125.1	NZ_JAAEWB010000012.1 Erwinia amylovora strain Ea12 plasmid pEU30, whole genome shotgun sequence
Erwinia_amylovora_VTDMSF02	GCA_002732125.1	NZ_JAAEWB010000012.1 Erwinia amylovora strain Ea12 plasmid pEU30, whole genome shotgun sequence
Erwinia_amylovora_VTDMSF02	GCA_002732125.1	NZ_JAAEWB010000012.1 Erwinia amylovora strain Ea12 plasmid pEU30, whole genome shotgun sequence
Erwinia_amylovora_VTDMSF02	GCA_002732125.1	NZ_JAAEWB010000012.1 Erwinia amylovora strain Ea12 plasmid pEU30, whole genome shotgun sequence
Erwinia_amylovora_VTDMSF02	GCA_002732125.1	NZ_JAAEWB010000012.1 Erwinia amylovora strain Ea12 plasmid pEU30, whole genome shotgun sequence
Erwinia_amylovora_VTDMSF02	GCA_002732125.1	NZ_JAAEWH010000049.1 Erwinia amylovora strain Ea01-03 plasmid pEU30, whole genome shotgun sequence
Erwinia_amylovora_VTDMSF02	GCA_002732125.1	CU468130.1 Erwinia tasmaniensis strain ET1/99 complete plasmid pET35
Erwinia_amylovora_VTDMSF02	GCA_002732125.1	NZ_JAAEWH010000049.1 Erwinia amylovora strain Ea01-03 plasmid pEU30, whole genome shotgun sequence
Erwinia_amylovora_VTDMSF02	GCA_002732125.1	NZ_JAAEWB010000012.1 Erwinia amylovora strain Ea12 plasmid pEU30, whole genome shotgun sequence
Erwinia_amylovora_VTDMSF02	GCA_002732125.1	NZ_JAAEWH010000049.1 Erwinia amylovora strain Ea01-03 plasmid pEU30, whole genome shotgun sequence
Erwinia_amylovora_VTDMSF02	GCA_002732125.1	IMGVR_UViG_3300031151_000085
Erwinia_amylovora_VTDMSF02	GCA_002732125.1	NZ_JAAEWB010000012.1 Erwinia amylovora strain Ea12 plasmid pEU30, whole genome shotgun sequence
Erwinia_amylovora_VTDMSF02	GCA_002732125.1	NZ_JAAEWB010000012.1 Erwinia amylovora strain Ea12 plasmid pEU30, whole genome shotgun sequence
Erwinia_amylovora_VTDMSF02	GCA_002732125.1	NC_005814.1 Yersinia pestis biovar Microtus str. 91001 plasmid pCRY, complete sequence
Erwinia_amylovora_VTDMSF02	GCA_002732125.1	NZ_JAAEWB010000012.1 Erwinia amylovora strain Ea12 plasmid pEU30, whole genome shotgun sequence
Erwinia_amylovora_VTDMSF02	GCA_002732125.1	DTR_651038
Erwinia_amylovora_VTDMSF02	GCA_002732125.1	NZ_JAAEWB010000012.1 Erwinia amylovora strain Ea12 plasmid pEU30, whole genome shotgun sequence
Erwinia_amylovora_VTDMSF02	GCA_002732125.1	NZ_RRGT01000084.1 Escherichia coli strain FWSEC0128 map unlocalized plasmid unnamed2 FWSEC0128_contig00036, whole genome shotgun sequence
Erwinia_amylovora_VTDMSF02	GCA_002732125.1	NZ_JAAEWB010000012.1 Erwinia amylovora strain Ea12 plasmid pEU30, whole genome shotgun sequence
Erwinia_amylovora_VTDMSF02	GCA_002732125.1	AJJI01000025.1 Klebsiella pneumoniae subsp. pneumoniae DSM 30104 = JCM 1662 = NBRC 14940 strain DSM 30104 plasmid pKPt3 Contig00025, whole genome shotgun sequence
Erwinia_amylovora_VTDMSF02	GCA_002732125.1	NZ_JAAEWH010000049.1 Erwinia amylovora strain Ea01-03 plasmid pEU30, whole genome shotgun sequence
Erwinia_amylovora_VTDMSF02	GCA_002732125.1	NZ_JAAEWB010000012.1 Erwinia amylovora strain Ea12 plasmid pEU30, whole genome shotgun sequence
Erwinia_amylovora_VTDMSF02	GCA_002732125.1	NZ_JAAEWR010000012.1 Erwinia amylovora strain 39-I-II plasmid pEA72, whole genome shotgun sequence
Erwinia_amylovora_VTDMSF02	GCA_002732125.1	NZ_JAAEWB010000012.1 Erwinia amylovora strain Ea12 plasmid pEU30, whole genome shotgun sequence
Erwinia_amylovora_VTDMSF02	GCA_002732125.1	NZ_JAAEWB010000012.1 Erwinia amylovora strain Ea12 plasmid pEU30, whole genome shotgun sequence
Erwinia_amylovora_VTDMSF02	GCA_002732125.1	NZ_JAAEWH010000049.1 Erwinia amylovora strain Ea01-03 plasmid pEU30, whole genome shotgun sequence
Erwinia_amylovora_VTDMSF02	GCA_002732125.1	NZ_JAAEWB010000012.1 Erwinia amylovora strain Ea12 plasmid pEU30, whole genome shotgun sequence
Erwinia_amylovora_VTDMSF02	GCA_002732125.1	NZ_JAAEWB010000012.1 Erwinia amylovora strain Ea12 plasmid pEU30, whole genome shotgun sequence
Erwinia_amylovora_VTDMSF02	GCA_002732125.1	NZ_JAAEWB010000012.1 Erwinia amylovora strain Ea12 plasmid pEU30, whole genome shotgun sequence
Erwinia_amylovora_VTDMSF02	GCA_002732125.1	NZ_JAAEWB010000012.1 Erwinia amylovora strain Ea12 plasmid pEU30, whole genome shotgun sequence
Erwinia_amylovora_VTDMSF02	GCA_002732125.1	CU468130.1 Erwinia tasmaniensis strain ET1/99 complete plasmid pET35
Erwinia_amylovora_VTDMSF02	GCA_002732125.1	KJ685892.1 Salmonella enterica subsp. enterica serovar Hadar strain 139.67 plasmid KVHS-004 plasmid mediated quinolone resistance protein (qnrD1) and regulator protein (rop) genes, complete cds
Erwinia_amylovora_VTDMSF02	GCA_002732125.1	NZ_CP028352.1 Pantoea vagans strain PV989 plasmid pPV989-94, complete sequence
Erwinia_amylovora_VTDMSF02	GCA_002732125.1	NZ_JAAEWH010000049.1 Erwinia amylovora strain Ea01-03 plasmid pEU30, whole genome shotgun sequence
Erwinia_amylovora_VTDMSF02	GCA_002732125.1	NZ_CP054046.1 Yersinia massiliensis strain 2011N-4075 plasmid unnamed1, complete sequence
Erwinia_amylovora_VTDMSF02	GCA_002732125.1	NZ_JAAEWH010000049.1 Erwinia amylovora strain Ea01-03 plasmid pEU30, whole genome shotgun sequence
Erwinia_amylovora_VTDMSF02	GCA_002732125.1	NZ_JAAEWB010000012.1 Erwinia amylovora strain Ea12 plasmid pEU30, whole genome shotgun sequence
Erwinia_amylovora_VTDMSF02	GCA_002732125.1	NZ_CP030267.1 Klebsiella pneumoniae subsp. pneumoniae strain SC-7 plasmid pSC7-KPC, complete sequence
Erwinia_amylovora_VTDMSF02	GCA_002732125.1	NZ_CP030267.1 Klebsiella pneumoniae subsp. pneumoniae strain SC-7 plasmid pSC7-KPC, complete sequence
Erwinia_amylovora_VTDMSF02	GCA_002732125.1	NZ_JAAEWH010000049.1 Erwinia amylovora strain Ea01-03 plasmid pEU30, whole genome shotgun sequence
Erwinia_amylovora_VTDMSF02	GCA_002732125.1	NZ_JAAEWB010000012.1 Erwinia amylovora strain Ea12 plasmid pEU30, whole genome shotgun sequence
Erwinia_amylovora_VTDMSF02	GCA_002732125.1	NZ_JAAEWH010000049.1 Erwinia amylovora strain Ea01-03 plasmid pEU30, whole genome shotgun sequence
Erwinia_amylovora_VTDMSF02	GCA_002732125.1	NZ_JAAEWB010000012.1 Erwinia amylovora strain Ea12 plasmid pEU30, whole genome shotgun sequence
Erwinia_amylovora_VTDMSF02	GCA_002732125.1	IMGVR_UViG_3300031420_000044
Erwinia_amylovora_VTDMSF02	GCA_002732125.1	NZ_JAAEWH010000049.1 Erwinia amylovora strain Ea01-03 plasmid pEU30, whole genome shotgun sequence
Erwinia_amylovora_VTDMSF02	GCA_002732125.1	NZ_JAAEWB010000012.1 Erwinia amylovora strain Ea12 plasmid pEU30, whole genome shotgun sequence
Erwinia_amylovora_VTDMSF02	GCA_002732125.1	IMGVR_UViG_3300030005_000023
Erwinia_amylovora_VTDMSF02	GCA_002732125.1	NZ_JAAEWB010000012.1 Erwinia amylovora strain Ea12 plasmid pEU30, whole genome shotgun sequence
Erwinia_amylovora_VTDMSF02	GCA_002732125.1	CU468130.1 Erwinia tasmaniensis strain ET1/99 complete plasmid pET35
Erwinia_amylovora_VTDMSF02	GCA_002732125.1	NZ_JAAEWB010000012.1 Erwinia amylovora strain Ea12 plasmid pEU30, whole genome shotgun sequence
Erwinia_amylovora_VTDMSF02	GCA_002732125.1	NZ_JAAEWB010000012.1 Erwinia amylovora strain Ea12 plasmid pEU30, whole genome shotgun sequence
Erwinia_amylovora_VTDMSF02	GCA_002732125.1	NZ_JAAEWB010000012.1 Erwinia amylovora strain Ea12 plasmid pEU30, whole genome shotgun sequence
Erwinia_amylovora_VTDMSF02	GCA_002732125.1	FQ482085.1 Erwinia tasmaniensis phage phiEt88 complete genome
Erwinia_amylovora_MASHBO	GCA_002732135.1	CU468130.1 Erwinia tasmaniensis strain ET1/99 complete plasmid pET35
Erwinia_amylovora_MASHBO	GCA_002732135.1	IMGVR_UViG_3300031420_000044
Erwinia_amylovora_MASHBO	GCA_002732135.1	NZ_JAAEWR010000012.1 Erwinia amylovora strain 39-I-II plasmid pEA72, whole genome shotgun sequence
Erwinia_amylovora_MASHBO	GCA_002732135.1	KJ685892.1 Salmonella enterica subsp. enterica serovar Hadar strain 139.67 plasmid KVHS-004 plasmid mediated quinolone resistance protein (qnrD1) and regulator protein (rop) genes, complete cds
Erwinia_amylovora_MASHBO	GCA_002732135.1	NZ_CP030267.1 Klebsiella pneumoniae subsp. pneumoniae strain SC-7 plasmid pSC7-KPC, complete sequence
Erwinia_amylovora_MASHBO	GCA_002732135.1	FQ482085.1 Erwinia tasmaniensis phage phiEt88 complete genome
Erwinia_amylovora_MASHBO	GCA_002732135.1	NC_011148.1 Salmonella enterica subsp. enterica serovar Agona str. SL483 plasmid unnamed, complete sequence
Erwinia_amylovora_MASHBO	GCA_002732135.1	NZ_JAAEWB010000012.1 Erwinia amylovora strain Ea12 plasmid pEU30, whole genome shotgun sequence
Erwinia_amylovora_MASHBO	GCA_002732135.1	NZ_CP030267.1 Klebsiella pneumoniae subsp. pneumoniae strain SC-7 plasmid pSC7-KPC, complete sequence
Erwinia_amylovora_MASHBO	GCA_002732135.1	NZ_JAAEWH010000068.1 Erwinia amylovora strain Ea01-03 plasmid pEA4.0, whole genome shotgun sequence
Erwinia_amylovora_MASHBO	GCA_002732135.1	CU468130.1 Erwinia tasmaniensis strain ET1/99 complete plasmid pET35
Erwinia_amylovora_MASHBO	GCA_002732135.1	CU468130.1 Erwinia tasmaniensis strain ET1/99 complete plasmid pET35
Erwinia_amylovora_MASHBO	GCA_002732135.1	NZ_CP030267.1 Klebsiella pneumoniae subsp. pneumoniae strain SC-7 plasmid pSC7-KPC, complete sequence
Erwinia_amylovora_MASHBO	GCA_002732135.1	NZ_JAAEWH010000049.1 Erwinia amylovora strain Ea01-03 plasmid pEU30, whole genome shotgun sequence
Erwinia_amylovora_MAGFLF_2	GCA_002732175.1	NZ_JAAEWH010000049.1 Erwinia amylovora strain Ea01-03 plasmid pEU30, whole genome shotgun sequence
Erwinia_amylovora_MAGFLF_2	GCA_002732175.1	NZ_JAAEWB010000012.1 Erwinia amylovora strain Ea12 plasmid pEU30, whole genome shotgun sequence
Erwinia_amylovora_MAGFLF_2	GCA_002732175.1	KJ685892.1 Salmonella enterica subsp. enterica serovar Hadar strain 139.67 plasmid KVHS-004 plasmid mediated quinolone resistance protein (qnrD1) and regulator protein (rop) genes, complete cds
Erwinia_amylovora_MAGFLF_2	GCA_002732175.1	NZ_JAAEWB010000012.1 Erwinia amylovora strain Ea12 plasmid pEU30, whole genome shotgun sequence
Erwinia_amylovora_MAGFLF_2	GCA_002732175.1	NZ_JAAEWH010000049.1 Erwinia amylovora strain Ea01-03 plasmid pEU30, whole genome shotgun sequence
Erwinia_amylovora_MAGFLF_2	GCA_002732175.1	NZ_CP054046.1 Yersinia massiliensis strain 2011N-4075 plasmid unnamed1, complete sequence
Erwinia_amylovora_MAGFLF_2	GCA_002732175.1	NZ_JAAEWH010000049.1 Erwinia amylovora strain Ea01-03 plasmid pEU30, whole genome shotgun sequence
Erwinia_amylovora_MAGFLF_2	GCA_002732175.1	NZ_JAAEWB010000012.1 Erwinia amylovora strain Ea12 plasmid pEU30, whole genome shotgun sequence
Erwinia_amylovora_MAGFLF_2	GCA_002732175.1	NZ_JAAEWB010000012.1 Erwinia amylovora strain Ea12 plasmid pEU30, whole genome shotgun sequence
Erwinia_amylovora_MAGFLF_2	GCA_002732175.1	NZ_JAAEWH010000049.1 Erwinia amylovora strain Ea01-03 plasmid pEU30, whole genome shotgun sequence
Erwinia_amylovora_MAGFLF_2	GCA_002732175.1	NZ_JAAEWB010000012.1 Erwinia amylovora strain Ea12 plasmid pEU30, whole genome shotgun sequence
Erwinia_amylovora_MAGFLF_2	GCA_002732175.1	DTR_651038
Erwinia_amylovora_MAGFLF_2	GCA_002732175.1	BK049330.1 TPA_asm: Myoviridae sp. isolate ct8vj1, partial genome
Erwinia_amylovora_MAGFLF_2	GCA_002732175.1	NZ_JAAEWB010000012.1 Erwinia amylovora strain Ea12 plasmid pEU30, whole genome shotgun sequence
Erwinia_amylovora_MAGFLF_2	GCA_002732175.1	NZ_JAAEWB010000012.1 Erwinia amylovora strain Ea12 plasmid pEU30, whole genome shotgun sequence
Erwinia_amylovora_MAGFLF_2	GCA_002732175.1	NZ_JAAEWB010000012.1 Erwinia amylovora strain Ea12 plasmid pEU30, whole genome shotgun sequence
Erwinia_amylovora_MAGFLF_2	GCA_002732175.1	NZ_JAAEWH010000049.1 Erwinia amylovora strain Ea01-03 plasmid pEU30, whole genome shotgun sequence
Erwinia_amylovora_MAGFLF_2	GCA_002732175.1	NZ_CP030267.1 Klebsiella pneumoniae subsp. pneumoniae strain SC-7 plasmid pSC7-KPC, complete sequence
Erwinia_amylovora_MAGFLF_2	GCA_002732175.1	NZ_RRGT01000084.1 Escherichia coli strain FWSEC0128 map unlocalized plasmid unnamed2 FWSEC0128_contig00036, whole genome shotgun sequence
Erwinia_amylovora_MAGFLF_2	GCA_002732175.1	NZ_JAAEWB010000012.1 Erwinia amylovora strain Ea12 plasmid pEU30, whole genome shotgun sequence
Erwinia_amylovora_MAGFLF_2	GCA_002732175.1	NZ_JAAEWB010000012.1 Erwinia amylovora strain Ea12 plasmid pEU30, whole genome shotgun sequence
Erwinia_amylovora_MAGFLF_2	GCA_002732175.1	CU468130.1 Erwinia tasmaniensis strain ET1/99 complete plasmid pET35
Erwinia_amylovora_MAGFLF_2	GCA_002732175.1	NZ_JAAEWB010000012.1 Erwinia amylovora strain Ea12 plasmid pEU30, whole genome shotgun sequence
Erwinia_amylovora_MAGFLF_2	GCA_002732175.1	NZ_JAAEWH010000049.1 Erwinia amylovora strain Ea01-03 plasmid pEU30, whole genome shotgun sequence
Erwinia_amylovora_MAGFLF_2	GCA_002732175.1	NZ_CP028352.1 Pantoea vagans strain PV989 plasmid pPV989-94, complete sequence
Erwinia_amylovora_MAGFLF_2	GCA_002732175.1	NZ_JAAEWB010000012.1 Erwinia amylovora strain Ea12 plasmid pEU30, whole genome shotgun sequence
Erwinia_amylovora_MAGFLF_2	GCA_002732175.1	NZ_JAAEWB010000012.1 Erwinia amylovora strain Ea12 plasmid pEU30, whole genome shotgun sequence
Erwinia_amylovora_MAGFLF_2	GCA_002732175.1	NZ_CP030267.1 Klebsiella pneumoniae subsp. pneumoniae strain SC-7 plasmid pSC7-KPC, complete sequence
Erwinia_amylovora_MAGFLF_2	GCA_002732175.1	NZ_JAAEWB010000012.1 Erwinia amylovora strain Ea12 plasmid pEU30, whole genome shotgun sequence
Erwinia_amylovora_MAGFLF_2	GCA_002732175.1	NZ_JAAEWB010000012.1 Erwinia amylovora strain Ea12 plasmid pEU30, whole genome shotgun sequence
Erwinia_amylovora_MAGFLF_2	GCA_002732175.1	NC_005814.1 Yersinia pestis biovar Microtus str. 91001 plasmid pCRY, complete sequence
Erwinia_amylovora_MAGFLF_2	GCA_002732175.1	NZ_JAAEWH010000049.1 Erwinia amylovora strain Ea01-03 plasmid pEU30, whole genome shotgun sequence
Erwinia_amylovora_MAGFLF_2	GCA_002732175.1	NZ_JAAEWB010000012.1 Erwinia amylovora strain Ea12 plasmid pEU30, whole genome shotgun sequence
Erwinia_amylovora_MAGFLF_2	GCA_002732175.1	NZ_JAAEWB010000012.1 Erwinia amylovora strain Ea12 plasmid pEU30, whole genome shotgun sequence
Erwinia_amylovora_MAGFLF_2	GCA_002732175.1	NZ_JAAEWH010000049.1 Erwinia amylovora strain Ea01-03 plasmid pEU30, whole genome shotgun sequence
Erwinia_amylovora_MAGFLF_2	GCA_002732175.1	NZ_JAAEWB010000012.1 Erwinia amylovora strain Ea12 plasmid pEU30, whole genome shotgun sequence
Erwinia_amylovora_MAGFLF_2	GCA_002732175.1	NZ_JAAEWB010000012.1 Erwinia amylovora strain Ea12 plasmid pEU30, whole genome shotgun sequence
Erwinia_amylovora_MAGFLF_2	GCA_002732175.1	NZ_JAAEWR010000012.1 Erwinia amylovora strain 39-I-II plasmid pEA72, whole genome shotgun sequence
Erwinia_amylovora_MAGFLF_2	GCA_002732175.1	NZ_JAAEWB010000012.1 Erwinia amylovora strain Ea12 plasmid pEU30, whole genome shotgun sequence
Erwinia_amylovora_MAGFLF_2	GCA_002732175.1	NZ_JAAEWB010000012.1 Erwinia amylovora strain Ea12 plasmid pEU30, whole genome shotgun sequence
Erwinia_amylovora_MAGFLF_2	GCA_002732175.1	NZ_JAAEWB010000012.1 Erwinia amylovora strain Ea12 plasmid pEU30, whole genome shotgun sequence
Erwinia_amylovora_MAGFLF_2	GCA_002732175.1	NZ_JAAEWB010000012.1 Erwinia amylovora strain Ea12 plasmid pEU30, whole genome shotgun sequence
Erwinia_amylovora_MAGFLF_2	GCA_002732175.1	NZ_JAAEWB010000012.1 Erwinia amylovora strain Ea12 plasmid pEU30, whole genome shotgun sequence
Erwinia_amylovora_MAGFLF_2	GCA_002732175.1	NZ_JAAEWB010000012.1 Erwinia amylovora strain Ea12 plasmid pEU30, whole genome shotgun sequence
Erwinia_amylovora_MAGFLF_2	GCA_002732175.1	NZ_JAAEWH010000049.1 Erwinia amylovora strain Ea01-03 plasmid pEU30, whole genome shotgun sequence
Erwinia_amylovora_MAGFLF_2	GCA_002732175.1	NZ_JAAEWB010000012.1 Erwinia amylovora strain Ea12 plasmid pEU30, whole genome shotgun sequence
Erwinia_amylovora_MAGFLF_2	GCA_002732175.1	NZ_JAAEWB010000012.1 Erwinia amylovora strain Ea12 plasmid pEU30, whole genome shotgun sequence
Erwinia_amylovora_MAGFLF_2	GCA_002732175.1	NZ_JAAEWB010000012.1 Erwinia amylovora strain Ea12 plasmid pEU30, whole genome shotgun sequence
Erwinia_amylovora_CTBT3_1	GCA_002732205.1	NZ_JAAEWB010000012.1 Erwinia amylovora strain Ea12 plasmid pEU30, whole genome shotgun sequence
Erwinia_amylovora_CTBT3_1	GCA_002732205.1	NZ_CP028352.1 Pantoea vagans strain PV989 plasmid pPV989-94, complete sequence
Erwinia_amylovora_CTBT3_1	GCA_002732205.1	NZ_JAAEWB010000012.1 Erwinia amylovora strain Ea12 plasmid pEU30, whole genome shotgun sequence
Erwinia_amylovora_CTBT3_1	GCA_002732205.1	NZ_JAAEWB010000012.1 Erwinia amylovora strain Ea12 plasmid pEU30, whole genome shotgun sequence
Erwinia_amylovora_CTBT3_1	GCA_002732205.1	NZ_JAAEWB010000012.1 Erwinia amylovora strain Ea12 plasmid pEU30, whole genome shotgun sequence
Erwinia_amylovora_CTBT3_1	GCA_002732205.1	BK049330.1 TPA_asm: Myoviridae sp. isolate ct8vj1, partial genome
Erwinia_amylovora_CTBT3_1	GCA_002732205.1	NZ_JAAEWH010000049.1 Erwinia amylovora strain Ea01-03 plasmid pEU30, whole genome shotgun sequence
Erwinia_amylovora_CTBT3_1	GCA_002732205.1	NZ_JAAEWH010000049.1 Erwinia amylovora strain Ea01-03 plasmid pEU30, whole genome shotgun sequence
Erwinia_amylovora_CTBT3_1	GCA_002732205.1	NZ_RRGT01000084.1 Escherichia coli strain FWSEC0128 map unlocalized plasmid unnamed2 FWSEC0128_contig00036, whole genome shotgun sequence
Erwinia_amylovora_CTBT3_1	GCA_002732205.1	NZ_JAAEWB010000012.1 Erwinia amylovora strain Ea12 plasmid pEU30, whole genome shotgun sequence
Erwinia_amylovora_CTBT3_1	GCA_002732205.1	NZ_JAAEWB010000012.1 Erwinia amylovora strain Ea12 plasmid pEU30, whole genome shotgun sequence
Erwinia_amylovora_CTBT3_1	GCA_002732205.1	DTR_651038
Erwinia_amylovora_CTBT3_1	GCA_002732205.1	NZ_JAAEWB010000012.1 Erwinia amylovora strain Ea12 plasmid pEU30, whole genome shotgun sequence
Erwinia_amylovora_CTBT3_1	GCA_002732205.1	NZ_JAAEWH010000049.1 Erwinia amylovora strain Ea01-03 plasmid pEU30, whole genome shotgun sequence
Erwinia_amylovora_CTBT3_1	GCA_002732205.1	NZ_JAAEWB010000012.1 Erwinia amylovora strain Ea12 plasmid pEU30, whole genome shotgun sequence
Erwinia_amylovora_CTBT3_1	GCA_002732205.1	CU468130.1 Erwinia tasmaniensis strain ET1/99 complete plasmid pET35
Erwinia_amylovora_CTBT3_1	GCA_002732205.1	NZ_JAAEWH010000049.1 Erwinia amylovora strain Ea01-03 plasmid pEU30, whole genome shotgun sequence
Erwinia_amylovora_CTBT3_1	GCA_002732205.1	NZ_JAAEWH010000049.1 Erwinia amylovora strain Ea01-03 plasmid pEU30, whole genome shotgun sequence
Erwinia_amylovora_CTBT3_1	GCA_002732205.1	NZ_JAAEWB010000012.1 Erwinia amylovora strain Ea12 plasmid pEU30, whole genome shotgun sequence
Erwinia_amylovora_CTBT3_1	GCA_002732205.1	NZ_JAAEWB010000012.1 Erwinia amylovora strain Ea12 plasmid pEU30, whole genome shotgun sequence
Erwinia_amylovora_CTBT3_1	GCA_002732205.1	NZ_JAAEWB010000012.1 Erwinia amylovora strain Ea12 plasmid pEU30, whole genome shotgun sequence
Erwinia_amylovora_CTBT3_1	GCA_002732205.1	NZ_JAAEWR010000012.1 Erwinia amylovora strain 39-I-II plasmid pEA72, whole genome shotgun sequence
Erwinia_amylovora_CTBT3_1	GCA_002732205.1	NZ_JAAEWB010000012.1 Erwinia amylovora strain Ea12 plasmid pEU30, whole genome shotgun sequence
Erwinia_amylovora_CTBT3_1	GCA_002732205.1	NZ_JAAEWB010000012.1 Erwinia amylovora strain Ea12 plasmid pEU30, whole genome shotgun sequence
Erwinia_amylovora_CTBT3_1	GCA_002732205.1	NZ_CP030267.1 Klebsiella pneumoniae subsp. pneumoniae strain SC-7 plasmid pSC7-KPC, complete sequence
Erwinia_amylovora_CTBT3_1	GCA_002732205.1	AJJI01000025.1 Klebsiella pneumoniae subsp. pneumoniae DSM 30104 = JCM 1662 = NBRC 14940 strain DSM 30104 plasmid pKPt3 Contig00025, whole genome shotgun sequence
Erwinia_amylovora_CTBT3_1	GCA_002732205.1	NZ_JAAEWB010000012.1 Erwinia amylovora strain Ea12 plasmid pEU30, whole genome shotgun sequence
Erwinia_amylovora_CTBT3_1	GCA_002732205.1	NZ_JAAEWB010000012.1 Erwinia amylovora strain Ea12 plasmid pEU30, whole genome shotgun sequence
Erwinia_amylovora_CTBT3_1	GCA_002732205.1	KJ685892.1 Salmonella enterica subsp. enterica serovar Hadar strain 139.67 plasmid KVHS-004 plasmid mediated quinolone resistance protein (qnrD1) and regulator protein (rop) genes, complete cds
Erwinia_amylovora_CTBT3_1	GCA_002732205.1	NZ_CP030267.1 Klebsiella pneumoniae subsp. pneumoniae strain SC-7 plasmid pSC7-KPC, complete sequence
Erwinia_amylovora_CTBT3_1	GCA_002732205.1	NZ_JAAEWH010000049.1 Erwinia amylovora strain Ea01-03 plasmid pEU30, whole genome shotgun sequence
Erwinia_amylovora_CTBT3_1	GCA_002732205.1	NZ_JAAEWB010000012.1 Erwinia amylovora strain Ea12 plasmid pEU30, whole genome shotgun sequence
Erwinia_amylovora_CTBT3_1	GCA_002732205.1	NZ_JAAEWB010000012.1 Erwinia amylovora strain Ea12 plasmid pEU30, whole genome shotgun sequence
Erwinia_amylovora_CTBT3_1	GCA_002732205.1	NZ_CP030267.1 Klebsiella pneumoniae subsp. pneumoniae strain SC-7 plasmid pSC7-KPC, complete sequence
Erwinia_amylovora_CTBT3_1	GCA_002732205.1	NZ_JAAEWH010000049.1 Erwinia amylovora strain Ea01-03 plasmid pEU30, whole genome shotgun sequence
Erwinia_amylovora_CTBT3_1	GCA_002732205.1	NZ_CP030267.1 Klebsiella pneumoniae subsp. pneumoniae strain SC-7 plasmid pSC7-KPC, complete sequence
Erwinia_amylovora_CTBT3_1	GCA_002732205.1	NZ_CP054046.1 Yersinia massiliensis strain 2011N-4075 plasmid unnamed1, complete sequence
Erwinia_amylovora_CTBT3_1	GCA_002732205.1	NZ_JAAEWB010000012.1 Erwinia amylovora strain Ea12 plasmid pEU30, whole genome shotgun sequence
Erwinia_amylovora_CTBT3_1	GCA_002732205.1	NZ_CP030267.1 Klebsiella pneumoniae subsp. pneumoniae strain SC-7 plasmid pSC7-KPC, complete sequence
Erwinia_amylovora_CTBT3_1	GCA_002732205.1	NZ_JAAEWB010000012.1 Erwinia amylovora strain Ea12 plasmid pEU30, whole genome shotgun sequence
Erwinia_amylovora_CTBT3_1	GCA_002732205.1	NZ_JAAEWB010000012.1 Erwinia amylovora strain Ea12 plasmid pEU30, whole genome shotgun sequence
Erwinia_amylovora_CTBT3_1	GCA_002732205.1	NZ_JAAEWB010000012.1 Erwinia amylovora strain Ea12 plasmid pEU30, whole genome shotgun sequence
Erwinia_amylovora_CTBT3_1	GCA_002732205.1	NC_005814.1 Yersinia pestis biovar Microtus str. 91001 plasmid pCRY, complete sequence
Erwinia_amylovora_CTBT3_1	GCA_002732205.1	FQ482085.1 Erwinia tasmaniensis phage phiEt88 complete genome
Erwinia_amylovora_CTBT3_1	GCA_002732205.1	NZ_JAAEWB010000012.1 Erwinia amylovora strain Ea12 plasmid pEU30, whole genome shotgun sequence
Erwinia_amylovora_CTBT3_1	GCA_002732205.1	IMGVR_UViG_3300031151_000085
Erwinia_amylovora_CTBT3_1	GCA_002732205.1	NZ_JAAEWB010000012.1 Erwinia amylovora strain Ea12 plasmid pEU30, whole genome shotgun sequence
Erwinia_amylovora_CTBT3_1	GCA_002732205.1	NZ_JAAEWH010000049.1 Erwinia amylovora strain Ea01-03 plasmid pEU30, whole genome shotgun sequence
Erwinia_amylovora_CTBT3_1	GCA_002732205.1	NZ_JAAEWH010000049.1 Erwinia amylovora strain Ea01-03 plasmid pEU30, whole genome shotgun sequence
Erwinia_amylovora_CTBT3_1	GCA_002732205.1	NZ_JAAEWH010000049.1 Erwinia amylovora strain Ea01-03 plasmid pEU30, whole genome shotgun sequence
Erwinia_amylovora_CTBT3_1	GCA_002732205.1	NZ_JAAEWH010000049.1 Erwinia amylovora strain Ea01-03 plasmid pEU30, whole genome shotgun sequence
Erwinia_amylovora_CTBT3_1	GCA_002732205.1	NZ_JAAEWB010000012.1 Erwinia amylovora strain Ea12 plasmid pEU30, whole genome shotgun sequence
Erwinia_amylovora_CTBT3_1	GCA_002732205.1	CU468130.1 Erwinia tasmaniensis strain ET1/99 complete plasmid pET35
Erwinia_amylovora_CTBT3_1	GCA_002732205.1	NZ_JAAEWB010000012.1 Erwinia amylovora strain Ea12 plasmid pEU30, whole genome shotgun sequence
Erwinia_amylovora_CTBT3_1	GCA_002732205.1	NZ_JAAEWB010000012.1 Erwinia amylovora strain Ea12 plasmid pEU30, whole genome shotgun sequence
Erwinia_amylovora_CTBT3_1	GCA_002732205.1	NZ_JAAEWB010000012.1 Erwinia amylovora strain Ea12 plasmid pEU30, whole genome shotgun sequence
Erwinia_amylovora_WSDA87_73	GCA_002732215.1	NZ_CP028352.1 Pantoea vagans strain PV989 plasmid pPV989-94, complete sequence
Erwinia_amylovora_WSDA87_73	GCA_002732215.1	KJ685892.1 Salmonella enterica subsp. enterica serovar Hadar strain 139.67 plasmid KVHS-004 plasmid mediated quinolone resistance protein (qnrD1) and regulator protein (rop) genes, complete cds
Erwinia_amylovora_WSDA87_73	GCA_002732215.1	NZ_CP030267.1 Klebsiella pneumoniae subsp. pneumoniae strain SC-7 plasmid pSC7-KPC, complete sequence
Erwinia_amylovora_WSDA87_73	GCA_002732215.1	NZ_CP030267.1 Klebsiella pneumoniae subsp. pneumoniae strain SC-7 plasmid pSC7-KPC, complete sequence
Erwinia_amylovora_WSDA87_73	GCA_002732215.1	NZ_JAAEWH010000068.1 Erwinia amylovora strain Ea01-03 plasmid pEA4.0, whole genome shotgun sequence
Erwinia_amylovora_WSDA87_73	GCA_002732215.1	NZ_JAAEWB010000012.1 Erwinia amylovora strain Ea12 plasmid pEU30, whole genome shotgun sequence
Erwinia_amylovora_WSDA87_73	GCA_002732215.1	NZ_CP030267.1 Klebsiella pneumoniae subsp. pneumoniae strain SC-7 plasmid pSC7-KPC, complete sequence
Erwinia_amylovora_WSDA87_73	GCA_002732215.1	NZ_JAAEWH010000049.1 Erwinia amylovora strain Ea01-03 plasmid pEU30, whole genome shotgun sequence
Erwinia_amylovora_WSDA87_73	GCA_002732215.1	CU468130.1 Erwinia tasmaniensis strain ET1/99 complete plasmid pET35
Erwinia_amylovora_WSDA87_73	GCA_002732215.1	IMGVR_UViG_3300031420_000044
Erwinia_amylovora_WSDA87_73	GCA_002732215.1	NC_005814.1 Yersinia pestis biovar Microtus str. 91001 plasmid pCRY, complete sequence
Erwinia_amylovora_WSDA87_73	GCA_002732215.1	NC_011148.1 Salmonella enterica subsp. enterica serovar Agona str. SL483 plasmid unnamed, complete sequence
Erwinia_amylovora_WSDA87_73	GCA_002732215.1	BK049330.1 TPA_asm: Myoviridae sp. isolate ct8vj1, partial genome
Erwinia_amylovora_WSDA87_73	GCA_002732215.1	CU468130.1 Erwinia tasmaniensis strain ET1/99 complete plasmid pET35
Erwinia_amylovora_WSDA87_73	GCA_002732215.1	NZ_JAAEWR010000012.1 Erwinia amylovora strain 39-I-II plasmid pEA72, whole genome shotgun sequence
Erwinia_amylovora_WSDA87_73	GCA_002732215.1	CU468130.1 Erwinia tasmaniensis strain ET1/99 complete plasmid pET35
Erwinia_amylovora_WSDA87_73	GCA_002732215.1	FQ482085.1 Erwinia tasmaniensis phage phiEt88 complete genome
Erwinia_amylovora_NHSB01_1	GCA_002732245.1	CU468130.1 Erwinia tasmaniensis strain ET1/99 complete plasmid pET35
Erwinia_amylovora_NHSB01_1	GCA_002732245.1	FQ482085.1 Erwinia tasmaniensis phage phiEt88 complete genome
Erwinia_amylovora_NHSB01_1	GCA_002732245.1	NZ_CP030267.1 Klebsiella pneumoniae subsp. pneumoniae strain SC-7 plasmid pSC7-KPC, complete sequence
Erwinia_amylovora_NHSB01_1	GCA_002732245.1	NZ_JAAEWB010000012.1 Erwinia amylovora strain Ea12 plasmid pEU30, whole genome shotgun sequence
Erwinia_amylovora_NHSB01_1	GCA_002732245.1	NC_011148.1 Salmonella enterica subsp. enterica serovar Agona str. SL483 plasmid unnamed, complete sequence
Erwinia_amylovora_NHSB01_1	GCA_002732245.1	NZ_JAAEWH010000068.1 Erwinia amylovora strain Ea01-03 plasmid pEA4.0, whole genome shotgun sequence
Erwinia_amylovora_NHSB01_1	GCA_002732245.1	IMGVR_UViG_3300031420_000044
Erwinia_amylovora_NHSB01_1	GCA_002732245.1	NZ_JAAEWH010000049.1 Erwinia amylovora strain Ea01-03 plasmid pEU30, whole genome shotgun sequence
Erwinia_amylovora_NHSB01_1	GCA_002732245.1	CU468130.1 Erwinia tasmaniensis strain ET1/99 complete plasmid pET35
Erwinia_amylovora_NHSB01_1	GCA_002732245.1	KJ685892.1 Salmonella enterica subsp. enterica serovar Hadar strain 139.67 plasmid KVHS-004 plasmid mediated quinolone resistance protein (qnrD1) and regulator protein (rop) genes, complete cds
Erwinia_amylovora_NHSB01_1	GCA_002732245.1	CU468130.1 Erwinia tasmaniensis strain ET1/99 complete plasmid pET35
Erwinia_amylovora_NHSB01_1	GCA_002732245.1	NZ_CP030267.1 Klebsiella pneumoniae subsp. pneumoniae strain SC-7 plasmid pSC7-KPC, complete sequence
Erwinia_amylovora_NHSB01_1	GCA_002732245.1	NZ_JAAEWR010000012.1 Erwinia amylovora strain 39-I-II plasmid pEA72, whole genome shotgun sequence
Erwinia_amylovora_NHSB01_1	GCA_002732245.1	NZ_CP030267.1 Klebsiella pneumoniae subsp. pneumoniae strain SC-7 plasmid pSC7-KPC, complete sequence
Erwinia_amylovora_VTBL01_1	GCA_002732255.1	NZ_JAAEWR010000012.1 Erwinia amylovora strain 39-I-II plasmid pEA72, whole genome shotgun sequence
Erwinia_amylovora_VTBL01_1	GCA_002732255.1	NC_005814.1 Yersinia pestis biovar Microtus str. 91001 plasmid pCRY, complete sequence
Erwinia_amylovora_VTBL01_1	GCA_002732255.1	IMGVR_UViG_3300031420_000044
Erwinia_amylovora_VTBL01_1	GCA_002732255.1	NZ_JAAEWH010000049.1 Erwinia amylovora strain Ea01-03 plasmid pEU30, whole genome shotgun sequence
Erwinia_amylovora_VTBL01_1	GCA_002732255.1	BK049330.1 TPA_asm: Myoviridae sp. isolate ct8vj1, partial genome
Erwinia_amylovora_VTBL01_1	GCA_002732255.1	CU468130.1 Erwinia tasmaniensis strain ET1/99 complete plasmid pET35
Erwinia_amylovora_VTBL01_1	GCA_002732255.1	NZ_CP030267.1 Klebsiella pneumoniae subsp. pneumoniae strain SC-7 plasmid pSC7-KPC, complete sequence
Erwinia_amylovora_VTBL01_1	GCA_002732255.1	CU468130.1 Erwinia tasmaniensis strain ET1/99 complete plasmid pET35
Erwinia_amylovora_VTBL01_1	GCA_002732255.1	KJ685892.1 Salmonella enterica subsp. enterica serovar Hadar strain 139.67 plasmid KVHS-004 plasmid mediated quinolone resistance protein (qnrD1) and regulator protein (rop) genes, complete cds
Erwinia_amylovora_VTBL01_1	GCA_002732255.1	NZ_JAAEWH010000068.1 Erwinia amylovora strain Ea01-03 plasmid pEA4.0, whole genome shotgun sequence
Erwinia_amylovora_VTBL01_1	GCA_002732255.1	FQ482085.1 Erwinia tasmaniensis phage phiEt88 complete genome
Erwinia_amylovora_VTBL01_1	GCA_002732255.1	NZ_CP030267.1 Klebsiella pneumoniae subsp. pneumoniae strain SC-7 plasmid pSC7-KPC, complete sequence
Erwinia_amylovora_VTBL01_1	GCA_002732255.1	NZ_CP028352.1 Pantoea vagans strain PV989 plasmid pPV989-94, complete sequence
Erwinia_amylovora_VTBL01_1	GCA_002732255.1	NZ_CP030267.1 Klebsiella pneumoniae subsp. pneumoniae strain SC-7 plasmid pSC7-KPC, complete sequence
Erwinia_amylovora_LA092	GCA_002732285.1	NZ_CP054046.1 Yersinia massiliensis strain 2011N-4075 plasmid unnamed1, complete sequence
Erwinia_amylovora_LA092	GCA_002732285.1	NZ_JAAEWH010000049.1 Erwinia amylovora strain Ea01-03 plasmid pEU30, whole genome shotgun sequence
Erwinia_amylovora_LA092	GCA_002732285.1	NZ_JAAEWB010000012.1 Erwinia amylovora strain Ea12 plasmid pEU30, whole genome shotgun sequence
Erwinia_amylovora_LA092	GCA_002732285.1	KJ685892.1 Salmonella enterica subsp. enterica serovar Hadar strain 139.67 plasmid KVHS-004 plasmid mediated quinolone resistance protein (qnrD1) and regulator protein (rop) genes, complete cds
Erwinia_amylovora_LA092	GCA_002732285.1	NZ_JAAEWH010000049.1 Erwinia amylovora strain Ea01-03 plasmid pEU30, whole genome shotgun sequence
Erwinia_amylovora_LA092	GCA_002732285.1	NZ_JAAEWB010000012.1 Erwinia amylovora strain Ea12 plasmid pEU30, whole genome shotgun sequence
Erwinia_amylovora_LA092	GCA_002732285.1	NZ_CP028352.1 Pantoea vagans strain PV989 plasmid pPV989-94, complete sequence
Erwinia_amylovora_LA092	GCA_002732285.1	NZ_JAAEWB010000012.1 Erwinia amylovora strain Ea12 plasmid pEU30, whole genome shotgun sequence
Erwinia_amylovora_LA092	GCA_002732285.1	NZ_JAAEWB010000012.1 Erwinia amylovora strain Ea12 plasmid pEU30, whole genome shotgun sequence
Erwinia_amylovora_LA092	GCA_002732285.1	NZ_JAAEWB010000012.1 Erwinia amylovora strain Ea12 plasmid pEU30, whole genome shotgun sequence
Erwinia_amylovora_LA092	GCA_002732285.1	NZ_JAAEWB010000012.1 Erwinia amylovora strain Ea12 plasmid pEU30, whole genome shotgun sequence
Erwinia_amylovora_LA092	GCA_002732285.1	NZ_JAAEWB010000012.1 Erwinia amylovora strain Ea12 plasmid pEU30, whole genome shotgun sequence
Erwinia_amylovora_LA092	GCA_002732285.1	NZ_JAAEWB010000012.1 Erwinia amylovora strain Ea12 plasmid pEU30, whole genome shotgun sequence
Erwinia_amylovora_LA092	GCA_002732285.1	NZ_JAAEWB010000012.1 Erwinia amylovora strain Ea12 plasmid pEU30, whole genome shotgun sequence
Erwinia_amylovora_LA092	GCA_002732285.1	NZ_JAAEWH010000049.1 Erwinia amylovora strain Ea01-03 plasmid pEU30, whole genome shotgun sequence
Erwinia_amylovora_LA092	GCA_002732285.1	NZ_JAAEWB010000012.1 Erwinia amylovora strain Ea12 plasmid pEU30, whole genome shotgun sequence
Erwinia_amylovora_LA092	GCA_002732285.1	NZ_JAAEWB010000012.1 Erwinia amylovora strain Ea12 plasmid pEU30, whole genome shotgun sequence
Erwinia_amylovora_LA092	GCA_002732285.1	IMGVR_UViG_3300030005_000023
Erwinia_amylovora_LA092	GCA_002732285.1	NZ_JAAEWB010000012.1 Erwinia amylovora strain Ea12 plasmid pEU30, whole genome shotgun sequence
Erwinia_amylovora_LA092	GCA_002732285.1	NZ_JAAEWB010000012.1 Erwinia amylovora strain Ea12 plasmid pEU30, whole genome shotgun sequence
Erwinia_amylovora_LA092	GCA_002732285.1	NZ_JAAEWB010000012.1 Erwinia amylovora strain Ea12 plasmid pEU30, whole genome shotgun sequence
Erwinia_amylovora_LA092	GCA_002732285.1	NZ_JAAEWB010000012.1 Erwinia amylovora strain Ea12 plasmid pEU30, whole genome shotgun sequence
Erwinia_amylovora_LA092	GCA_002732285.1	IMGVR_UViG_3300031420_000044
Erwinia_amylovora_LA092	GCA_002732285.1	NZ_JAAEWB010000012.1 Erwinia amylovora strain Ea12 plasmid pEU30, whole genome shotgun sequence
Erwinia_amylovora_LA092	GCA_002732285.1	NZ_JAAEWB010000012.1 Erwinia amylovora strain Ea12 plasmid pEU30, whole genome shotgun sequence
Erwinia_amylovora_LA092	GCA_002732285.1	NZ_JAAEWB010000012.1 Erwinia amylovora strain Ea12 plasmid pEU30, whole genome shotgun sequence
Erwinia_amylovora_LA092	GCA_002732285.1	NZ_CP030267.1 Klebsiella pneumoniae subsp. pneumoniae strain SC-7 plasmid pSC7-KPC, complete sequence
Erwinia_amylovora_LA092	GCA_002732285.1	NZ_JAAEWB010000012.1 Erwinia amylovora strain Ea12 plasmid pEU30, whole genome shotgun sequence
Erwinia_amylovora_LA092	GCA_002732285.1	NZ_JAAEWR010000012.1 Erwinia amylovora strain 39-I-II plasmid pEA72, whole genome shotgun sequence
Erwinia_amylovora_LA092	GCA_002732285.1	NZ_JAAEWB010000012.1 Erwinia amylovora strain Ea12 plasmid pEU30, whole genome shotgun sequence
Erwinia_amylovora_LA092	GCA_002732285.1	NZ_JAAEWH010000049.1 Erwinia amylovora strain Ea01-03 plasmid pEU30, whole genome shotgun sequence
Erwinia_amylovora_LA092	GCA_002732285.1	CU468130.1 Erwinia tasmaniensis strain ET1/99 complete plasmid pET35
Erwinia_amylovora_LA092	GCA_002732285.1	NZ_JAAEWB010000012.1 Erwinia amylovora strain Ea12 plasmid pEU30, whole genome shotgun sequence
Erwinia_amylovora_LA092	GCA_002732285.1	NZ_JAAEWH010000068.1 Erwinia amylovora strain Ea01-03 plasmid pEA4.0, whole genome shotgun sequence
Erwinia_amylovora_LA092	GCA_002732285.1	NZ_JAAEWB010000012.1 Erwinia amylovora strain Ea12 plasmid pEU30, whole genome shotgun sequence
Erwinia_amylovora_LA092	GCA_002732285.1	NZ_JAAEWH010000049.1 Erwinia amylovora strain Ea01-03 plasmid pEU30, whole genome shotgun sequence
Erwinia_amylovora_LA092	GCA_002732285.1	NZ_JAAEWB010000012.1 Erwinia amylovora strain Ea12 plasmid pEU30, whole genome shotgun sequence
Erwinia_amylovora_LA092	GCA_002732285.1	NZ_JAAEWB010000012.1 Erwinia amylovora strain Ea12 plasmid pEU30, whole genome shotgun sequence
Erwinia_amylovora_LA092	GCA_002732285.1	DTR_651038
Erwinia_amylovora_LA092	GCA_002732285.1	NZ_JAAEWB010000012.1 Erwinia amylovora strain Ea12 plasmid pEU30, whole genome shotgun sequence
Erwinia_amylovora_LA092	GCA_002732285.1	CU468130.1 Erwinia tasmaniensis strain ET1/99 complete plasmid pET35
Erwinia_amylovora_LA092	GCA_002732285.1	FQ482085.1 Erwinia tasmaniensis phage phiEt88 complete genome
Erwinia_amylovora_LA092	GCA_002732285.1	NZ_JAAEWH010000049.1 Erwinia amylovora strain Ea01-03 plasmid pEU30, whole genome shotgun sequence
Erwinia_amylovora_LA092	GCA_002732285.1	NZ_JAAEWH010000049.1 Erwinia amylovora strain Ea01-03 plasmid pEU30, whole genome shotgun sequence
Erwinia_amylovora_LA092	GCA_002732285.1	NZ_JAAEWB010000012.1 Erwinia amylovora strain Ea12 plasmid pEU30, whole genome shotgun sequence
Erwinia_amylovora_LA092	GCA_002732285.1	NZ_JAAEWB010000012.1 Erwinia amylovora strain Ea12 plasmid pEU30, whole genome shotgun sequence
Erwinia_amylovora_LA092	GCA_002732285.1	NC_005814.1 Yersinia pestis biovar Microtus str. 91001 plasmid pCRY, complete sequence
Erwinia_amylovora_LA092	GCA_002732285.1	CU468130.1 Erwinia tasmaniensis strain ET1/99 complete plasmid pET35
Erwinia_amylovora_LA092	GCA_002732285.1	NZ_JAAEWB010000012.1 Erwinia amylovora strain Ea12 plasmid pEU30, whole genome shotgun sequence
Erwinia_amylovora_LA092	GCA_002732285.1	BK049330.1 TPA_asm: Myoviridae sp. isolate ct8vj1, partial genome
Erwinia_amylovora_CTST01_1	GCA_002732295.1	NZ_CP028352.1 Pantoea vagans strain PV989 plasmid pPV989-94, complete sequence
Erwinia_amylovora_CTST01_1	GCA_002732295.1	NZ_JAAEWR010000012.1 Erwinia amylovora strain 39-I-II plasmid pEA72, whole genome shotgun sequence
Erwinia_amylovora_CTST01_1	GCA_002732295.1	NZ_CP054046.1 Yersinia massiliensis strain 2011N-4075 plasmid unnamed1, complete sequence
Erwinia_amylovora_CTST01_1	GCA_002732295.1	NZ_JAAEWB010000012.1 Erwinia amylovora strain Ea12 plasmid pEU30, whole genome shotgun sequence
Erwinia_amylovora_CTST01_1	GCA_002732295.1	NZ_JAAEWB010000012.1 Erwinia amylovora strain Ea12 plasmid pEU30, whole genome shotgun sequence
Erwinia_amylovora_CTST01_1	GCA_002732295.1	NZ_JAAEWB010000012.1 Erwinia amylovora strain Ea12 plasmid pEU30, whole genome shotgun sequence
Erwinia_amylovora_CTST01_1	GCA_002732295.1	FQ482085.1 Erwinia tasmaniensis phage phiEt88 complete genome
Erwinia_amylovora_CTST01_1	GCA_002732295.1	NZ_JAAEWH010000049.1 Erwinia amylovora strain Ea01-03 plasmid pEU30, whole genome shotgun sequence
Erwinia_amylovora_CTST01_1	GCA_002732295.1	KJ685892.1 Salmonella enterica subsp. enterica serovar Hadar strain 139.67 plasmid KVHS-004 plasmid mediated quinolone resistance protein (qnrD1) and regulator protein (rop) genes, complete cds
Erwinia_amylovora_CTST01_1	GCA_002732295.1	NZ_JAAEWB010000012.1 Erwinia amylovora strain Ea12 plasmid pEU30, whole genome shotgun sequence
Erwinia_amylovora_CTST01_1	GCA_002732295.1	IMGVR_UViG_3300031151_000085
Erwinia_amylovora_CTST01_1	GCA_002732295.1	NZ_JAAEWB010000012.1 Erwinia amylovora strain Ea12 plasmid pEU30, whole genome shotgun sequence
Erwinia_amylovora_CTST01_1	GCA_002732295.1	NZ_JAAEWH010000049.1 Erwinia amylovora strain Ea01-03 plasmid pEU30, whole genome shotgun sequence
Erwinia_amylovora_CTST01_1	GCA_002732295.1	IMGVR_UViG_3300031420_000044
Erwinia_amylovora_CTST01_1	GCA_002732295.1	NZ_JAAEWB010000012.1 Erwinia amylovora strain Ea12 plasmid pEU30, whole genome shotgun sequence
Erwinia_amylovora_CTST01_1	GCA_002732295.1	NZ_JAAEWB010000012.1 Erwinia amylovora strain Ea12 plasmid pEU30, whole genome shotgun sequence
Erwinia_amylovora_CTST01_1	GCA_002732295.1	NZ_JAAEWB010000012.1 Erwinia amylovora strain Ea12 plasmid pEU30, whole genome shotgun sequence
Erwinia_amylovora_CTST01_1	GCA_002732295.1	DTR_651038
Erwinia_amylovora_CTST01_1	GCA_002732295.1	NZ_JAAEWH010000049.1 Erwinia amylovora strain Ea01-03 plasmid pEU30, whole genome shotgun sequence
Erwinia_amylovora_CTST01_1	GCA_002732295.1	NZ_JAAEWB010000012.1 Erwinia amylovora strain Ea12 plasmid pEU30, whole genome shotgun sequence
Erwinia_amylovora_CTST01_1	GCA_002732295.1	AJJI01000025.1 Klebsiella pneumoniae subsp. pneumoniae DSM 30104 = JCM 1662 = NBRC 14940 strain DSM 30104 plasmid pKPt3 Contig00025, whole genome shotgun sequence
Erwinia_amylovora_CTST01_1	GCA_002732295.1	NZ_JAAEWB010000012.1 Erwinia amylovora strain Ea12 plasmid pEU30, whole genome shotgun sequence
Erwinia_amylovora_CTST01_1	GCA_002732295.1	NZ_JAAEWB010000012.1 Erwinia amylovora strain Ea12 plasmid pEU30, whole genome shotgun sequence
Erwinia_amylovora_CTST01_1	GCA_002732295.1	NZ_JAAEWB010000012.1 Erwinia amylovora strain Ea12 plasmid pEU30, whole genome shotgun sequence
Erwinia_amylovora_CTST01_1	GCA_002732295.1	NZ_CP030267.1 Klebsiella pneumoniae subsp. pneumoniae strain SC-7 plasmid pSC7-KPC, complete sequence
Erwinia_amylovora_CTST01_1	GCA_002732295.1	IMGVR_UViG_3300030005_000023
Erwinia_amylovora_CTST01_1	GCA_002732295.1	CU468130.1 Erwinia tasmaniensis strain ET1/99 complete plasmid pET35
Erwinia_amylovora_CTST01_1	GCA_002732295.1	NZ_JAAEWH010000068.1 Erwinia amylovora strain Ea01-03 plasmid pEA4.0, whole genome shotgun sequence
Erwinia_amylovora_CTST01_1	GCA_002732295.1	NZ_JAAEWB010000012.1 Erwinia amylovora strain Ea12 plasmid pEU30, whole genome shotgun sequence
Erwinia_amylovora_CTST01_1	GCA_002732295.1	CU468130.1 Erwinia tasmaniensis strain ET1/99 complete plasmid pET35
Erwinia_amylovora_CTST01_1	GCA_002732295.1	NZ_JAAEWB010000012.1 Erwinia amylovora strain Ea12 plasmid pEU30, whole genome shotgun sequence
Erwinia_amylovora_CTST01_1	GCA_002732295.1	NC_005814.1 Yersinia pestis biovar Microtus str. 91001 plasmid pCRY, complete sequence
Erwinia_amylovora_CTST01_1	GCA_002732295.1	NZ_JAAEWH010000049.1 Erwinia amylovora strain Ea01-03 plasmid pEU30, whole genome shotgun sequence
Erwinia_amylovora_CTST01_1	GCA_002732295.1	NZ_JAAEWH010000049.1 Erwinia amylovora strain Ea01-03 plasmid pEU30, whole genome shotgun sequence
Erwinia_amylovora_CTST01_1	GCA_002732295.1	NZ_JAAEWB010000012.1 Erwinia amylovora strain Ea12 plasmid pEU30, whole genome shotgun sequence
Erwinia_amylovora_CTST01_1	GCA_002732295.1	NZ_JAAEWB010000012.1 Erwinia amylovora strain Ea12 plasmid pEU30, whole genome shotgun sequence
Erwinia_amylovora_CTST01_1	GCA_002732295.1	NZ_JAAEWB010000012.1 Erwinia amylovora strain Ea12 plasmid pEU30, whole genome shotgun sequence
Erwinia_amylovora_CTST01_1	GCA_002732295.1	NZ_JAAEWH010000049.1 Erwinia amylovora strain Ea01-03 plasmid pEU30, whole genome shotgun sequence
Erwinia_amylovora_CTST01_1	GCA_002732295.1	NZ_JAAEWB010000012.1 Erwinia amylovora strain Ea12 plasmid pEU30, whole genome shotgun sequence
Erwinia_amylovora_CTST01_1	GCA_002732295.1	NZ_JAAEWB010000012.1 Erwinia amylovora strain Ea12 plasmid pEU30, whole genome shotgun sequence
Erwinia_amylovora_CTST01_1	GCA_002732295.1	NZ_JAAEWB010000012.1 Erwinia amylovora strain Ea12 plasmid pEU30, whole genome shotgun sequence
Erwinia_amylovora_CTST01_1	GCA_002732295.1	NZ_JAAEWB010000012.1 Erwinia amylovora strain Ea12 plasmid pEU30, whole genome shotgun sequence
Erwinia_amylovora_CTST01_1	GCA_002732295.1	NZ_CP030267.1 Klebsiella pneumoniae subsp. pneumoniae strain SC-7 plasmid pSC7-KPC, complete sequence
Erwinia_amylovora_CTST01_1	GCA_002732295.1	NZ_JAAEWH010000049.1 Erwinia amylovora strain Ea01-03 plasmid pEU30, whole genome shotgun sequence
Erwinia_amylovora_CTST01_1	GCA_002732295.1	NZ_JAAEWH010000049.1 Erwinia amylovora strain Ea01-03 plasmid pEU30, whole genome shotgun sequence
Erwinia_amylovora_CTST01_1	GCA_002732295.1	NZ_JAAEWB010000012.1 Erwinia amylovora strain Ea12 plasmid pEU30, whole genome shotgun sequence
Erwinia_amylovora_CTST01_1	GCA_002732295.1	NZ_JAAEWB010000012.1 Erwinia amylovora strain Ea12 plasmid pEU30, whole genome shotgun sequence
Erwinia_amylovora_CTST01_1	GCA_002732295.1	NZ_JAAEWB010000012.1 Erwinia amylovora strain Ea12 plasmid pEU30, whole genome shotgun sequence
Erwinia_amylovora_CTST01_1	GCA_002732295.1	CU468130.1 Erwinia tasmaniensis strain ET1/99 complete plasmid pET35
Erwinia_amylovora_CTST01_1	GCA_002732295.1	NZ_RRGT01000084.1 Escherichia coli strain FWSEC0128 map unlocalized plasmid unnamed2 FWSEC0128_contig00036, whole genome shotgun sequence
Erwinia_amylovora_CTST01_1	GCA_002732295.1	NZ_JAAEWB010000012.1 Erwinia amylovora strain Ea12 plasmid pEU30, whole genome shotgun sequence
Erwinia_amylovora_CTST01_1	GCA_002732295.1	NZ_JAAEWB010000012.1 Erwinia amylovora strain Ea12 plasmid pEU30, whole genome shotgun sequence
Erwinia_amylovora_CTST01_1	GCA_002732295.1	BK049330.1 TPA_asm: Myoviridae sp. isolate ct8vj1, partial genome
Erwinia_amylovora_CTST01_1	GCA_002732295.1	NZ_JAAEWB010000012.1 Erwinia amylovora strain Ea12 plasmid pEU30, whole genome shotgun sequence
Erwinia_amylovora_CTST01_1	GCA_002732295.1	NZ_JAAEWB010000012.1 Erwinia amylovora strain Ea12 plasmid pEU30, whole genome shotgun sequence
Erwinia_amylovora_CTST01_1	GCA_002732295.1	NZ_JAAEWB010000012.1 Erwinia amylovora strain Ea12 plasmid pEU30, whole genome shotgun sequence
Erwinia_amylovora_CTST01_1	GCA_002732295.1	NZ_JAAEWB010000012.1 Erwinia amylovora strain Ea12 plasmid pEU30, whole genome shotgun sequence
Erwinia_amylovora_CTST01_1	GCA_002732295.1	NZ_JAAEWB010000012.1 Erwinia amylovora strain Ea12 plasmid pEU30, whole genome shotgun sequence
Erwinia_amylovora_CTST01_1	GCA_002732295.1	NZ_CP030267.1 Klebsiella pneumoniae subsp. pneumoniae strain SC-7 plasmid pSC7-KPC, complete sequence
Erwinia_amylovora_CTST01_1	GCA_002732295.1	NZ_CP030267.1 Klebsiella pneumoniae subsp. pneumoniae strain SC-7 plasmid pSC7-KPC, complete sequence
Erwinia_amylovora_CTST01_1	GCA_002732295.1	NZ_JAAEWH010000049.1 Erwinia amylovora strain Ea01-03 plasmid pEU30, whole genome shotgun sequence
Erwinia_amylovora_CTST01_1	GCA_002732295.1	NZ_JAAEWB010000012.1 Erwinia amylovora strain Ea12 plasmid pEU30, whole genome shotgun sequence
Erwinia_amylovora_CTST01_1	GCA_002732295.1	NZ_JAAEWB010000012.1 Erwinia amylovora strain Ea12 plasmid pEU30, whole genome shotgun sequence
Erwinia_amylovora_CTMF03_1	GCA_002732315.1	NZ_JAAEWB010000012.1 Erwinia amylovora strain Ea12 plasmid pEU30, whole genome shotgun sequence
Erwinia_amylovora_CTMF03_1	GCA_002732315.1	IMGVR_UViG_3300031420_000044
Erwinia_amylovora_CTMF03_1	GCA_002732315.1	NZ_JAAEWB010000012.1 Erwinia amylovora strain Ea12 plasmid pEU30, whole genome shotgun sequence
Erwinia_amylovora_CTMF03_1	GCA_002732315.1	NZ_JAAEWH010000049.1 Erwinia amylovora strain Ea01-03 plasmid pEU30, whole genome shotgun sequence
Erwinia_amylovora_CTMF03_1	GCA_002732315.1	NZ_JAAEWH010000049.1 Erwinia amylovora strain Ea01-03 plasmid pEU30, whole genome shotgun sequence
Erwinia_amylovora_CTMF03_1	GCA_002732315.1	NZ_CP054046.1 Yersinia massiliensis strain 2011N-4075 plasmid unnamed1, complete sequence
Erwinia_amylovora_CTMF03_1	GCA_002732315.1	IMGVR_UViG_3300031151_000085
Erwinia_amylovora_CTMF03_1	GCA_002732315.1	NC_005814.1 Yersinia pestis biovar Microtus str. 91001 plasmid pCRY, complete sequence
Erwinia_amylovora_CTMF03_1	GCA_002732315.1	NZ_JAAEWB010000012.1 Erwinia amylovora strain Ea12 plasmid pEU30, whole genome shotgun sequence
Erwinia_amylovora_CTMF03_1	GCA_002732315.1	NZ_JAAEWB010000012.1 Erwinia amylovora strain Ea12 plasmid pEU30, whole genome shotgun sequence
Erwinia_amylovora_CTMF03_1	GCA_002732315.1	NZ_JAAEWB010000012.1 Erwinia amylovora strain Ea12 plasmid pEU30, whole genome shotgun sequence
Erwinia_amylovora_CTMF03_1	GCA_002732315.1	NZ_JAAEWH010000068.1 Erwinia amylovora strain Ea01-03 plasmid pEA4.0, whole genome shotgun sequence
Erwinia_amylovora_CTMF03_1	GCA_002732315.1	CU468130.1 Erwinia tasmaniensis strain ET1/99 complete plasmid pET35
Erwinia_amylovora_CTMF03_1	GCA_002732315.1	NZ_JAAEWB010000012.1 Erwinia amylovora strain Ea12 plasmid pEU30, whole genome shotgun sequence
Erwinia_amylovora_CTMF03_1	GCA_002732315.1	NZ_JAAEWB010000012.1 Erwinia amylovora strain Ea12 plasmid pEU30, whole genome shotgun sequence
Erwinia_amylovora_CTMF03_1	GCA_002732315.1	NZ_JAAEWB010000012.1 Erwinia amylovora strain Ea12 plasmid pEU30, whole genome shotgun sequence
Erwinia_amylovora_CTMF03_1	GCA_002732315.1	NZ_JAAEWB010000012.1 Erwinia amylovora strain Ea12 plasmid pEU30, whole genome shotgun sequence
Erwinia_amylovora_CTMF03_1	GCA_002732315.1	NZ_JAAEWB010000012.1 Erwinia amylovora strain Ea12 plasmid pEU30, whole genome shotgun sequence
Erwinia_amylovora_CTMF03_1	GCA_002732315.1	DTR_651038
Erwinia_amylovora_CTMF03_1	GCA_002732315.1	NZ_CP030267.1 Klebsiella pneumoniae subsp. pneumoniae strain SC-7 plasmid pSC7-KPC, complete sequence
Erwinia_amylovora_CTMF03_1	GCA_002732315.1	NZ_JAAEWB010000012.1 Erwinia amylovora strain Ea12 plasmid pEU30, whole genome shotgun sequence
Erwinia_amylovora_CTMF03_1	GCA_002732315.1	IMGVR_UViG_3300030005_000023
Erwinia_amylovora_CTMF03_1	GCA_002732315.1	NZ_CP030267.1 Klebsiella pneumoniae subsp. pneumoniae strain SC-7 plasmid pSC7-KPC, complete sequence
Erwinia_amylovora_CTMF03_1	GCA_002732315.1	NZ_JAAEWB010000012.1 Erwinia amylovora strain Ea12 plasmid pEU30, whole genome shotgun sequence
Erwinia_amylovora_CTMF03_1	GCA_002732315.1	NZ_JAAEWB010000012.1 Erwinia amylovora strain Ea12 plasmid pEU30, whole genome shotgun sequence
Erwinia_amylovora_CTMF03_1	GCA_002732315.1	NZ_JAAEWB010000012.1 Erwinia amylovora strain Ea12 plasmid pEU30, whole genome shotgun sequence
Erwinia_amylovora_CTMF03_1	GCA_002732315.1	FQ482085.1 Erwinia tasmaniensis phage phiEt88 complete genome
Erwinia_amylovora_CTMF03_1	GCA_002732315.1	NZ_CP028352.1 Pantoea vagans strain PV989 plasmid pPV989-94, complete sequence
Erwinia_amylovora_CTMF03_1	GCA_002732315.1	NZ_JAAEWH010000049.1 Erwinia amylovora strain Ea01-03 plasmid pEU30, whole genome shotgun sequence
Erwinia_amylovora_CTMF03_1	GCA_002732315.1	NZ_CP030267.1 Klebsiella pneumoniae subsp. pneumoniae strain SC-7 plasmid pSC7-KPC, complete sequence
Erwinia_amylovora_CTMF03_1	GCA_002732315.1	NZ_JAAEWB010000012.1 Erwinia amylovora strain Ea12 plasmid pEU30, whole genome shotgun sequence
Erwinia_amylovora_CTMF03_1	GCA_002732315.1	NZ_JAAEWB010000012.1 Erwinia amylovora strain Ea12 plasmid pEU30, whole genome shotgun sequence
Erwinia_amylovora_CTMF03_1	GCA_002732315.1	NZ_JAAEWB010000012.1 Erwinia amylovora strain Ea12 plasmid pEU30, whole genome shotgun sequence
Erwinia_amylovora_CTMF03_1	GCA_002732315.1	NZ_JAAEWB010000012.1 Erwinia amylovora strain Ea12 plasmid pEU30, whole genome shotgun sequence
Erwinia_amylovora_CTMF03_1	GCA_002732315.1	NZ_JAAEWH010000049.1 Erwinia amylovora strain Ea01-03 plasmid pEU30, whole genome shotgun sequence
Erwinia_amylovora_CTMF03_1	GCA_002732315.1	NZ_JAAEWB010000012.1 Erwinia amylovora strain Ea12 plasmid pEU30, whole genome shotgun sequence
Erwinia_amylovora_CTMF03_1	GCA_002732315.1	NZ_JAAEWB010000012.1 Erwinia amylovora strain Ea12 plasmid pEU30, whole genome shotgun sequence
Erwinia_amylovora_CTMF03_1	GCA_002732315.1	KJ685892.1 Salmonella enterica subsp. enterica serovar Hadar strain 139.67 plasmid KVHS-004 plasmid mediated quinolone resistance protein (qnrD1) and regulator protein (rop) genes, complete cds
Erwinia_amylovora_CTMF03_1	GCA_002732315.1	NZ_JAAEWB010000012.1 Erwinia amylovora strain Ea12 plasmid pEU30, whole genome shotgun sequence
Erwinia_amylovora_CTMF03_1	GCA_002732315.1	NZ_JAAEWH010000049.1 Erwinia amylovora strain Ea01-03 plasmid pEU30, whole genome shotgun sequence
Erwinia_amylovora_CTMF03_1	GCA_002732315.1	NZ_JAAEWB010000012.1 Erwinia amylovora strain Ea12 plasmid pEU30, whole genome shotgun sequence
Erwinia_amylovora_CTMF03_1	GCA_002732315.1	NZ_JAAEWB010000012.1 Erwinia amylovora strain Ea12 plasmid pEU30, whole genome shotgun sequence
Erwinia_amylovora_CTMF03_1	GCA_002732315.1	NZ_JAAEWH010000049.1 Erwinia amylovora strain Ea01-03 plasmid pEU30, whole genome shotgun sequence
Erwinia_amylovora_CTMF03_1	GCA_002732315.1	NZ_JAAEWH010000049.1 Erwinia amylovora strain Ea01-03 plasmid pEU30, whole genome shotgun sequence
Erwinia_amylovora_CTMF03_1	GCA_002732315.1	CU468130.1 Erwinia tasmaniensis strain ET1/99 complete plasmid pET35
Erwinia_amylovora_CTMF03_1	GCA_002732315.1	NZ_JAAEWB010000012.1 Erwinia amylovora strain Ea12 plasmid pEU30, whole genome shotgun sequence
Erwinia_amylovora_CTMF03_1	GCA_002732315.1	NZ_JAAEWB010000012.1 Erwinia amylovora strain Ea12 plasmid pEU30, whole genome shotgun sequence
Erwinia_amylovora_CTMF03_1	GCA_002732315.1	NZ_JAAEWB010000012.1 Erwinia amylovora strain Ea12 plasmid pEU30, whole genome shotgun sequence
Erwinia_amylovora_CTMF03_1	GCA_002732315.1	NZ_JAAEWH010000049.1 Erwinia amylovora strain Ea01-03 plasmid pEU30, whole genome shotgun sequence
Erwinia_amylovora_CTMF03_1	GCA_002732315.1	CU468130.1 Erwinia tasmaniensis strain ET1/99 complete plasmid pET35
Erwinia_amylovora_CTMF03_1	GCA_002732315.1	NZ_JAAEWB010000012.1 Erwinia amylovora strain Ea12 plasmid pEU30, whole genome shotgun sequence
Erwinia_amylovora_CTMF03_1	GCA_002732315.1	NZ_JAAEWB010000012.1 Erwinia amylovora strain Ea12 plasmid pEU30, whole genome shotgun sequence
Erwinia_amylovora_CTMF03_1	GCA_002732315.1	NZ_JAAEWH010000049.1 Erwinia amylovora strain Ea01-03 plasmid pEU30, whole genome shotgun sequence
Erwinia_amylovora_CTMF03_1	GCA_002732315.1	NZ_JAAEWH010000049.1 Erwinia amylovora strain Ea01-03 plasmid pEU30, whole genome shotgun sequence
Erwinia_amylovora_CTMF03_1	GCA_002732315.1	NZ_JAAEWB010000012.1 Erwinia amylovora strain Ea12 plasmid pEU30, whole genome shotgun sequence
Erwinia_amylovora_CTMF03_1	GCA_002732315.1	NZ_JAAEWB010000012.1 Erwinia amylovora strain Ea12 plasmid pEU30, whole genome shotgun sequence
Erwinia_amylovora_CTMF03_1	GCA_002732315.1	NZ_JAAEWB010000012.1 Erwinia amylovora strain Ea12 plasmid pEU30, whole genome shotgun sequence
Erwinia_amylovora_CTMF03_1	GCA_002732315.1	NZ_JAAEWH010000049.1 Erwinia amylovora strain Ea01-03 plasmid pEU30, whole genome shotgun sequence
Erwinia_amylovora_CTMF03_1	GCA_002732315.1	NZ_CP030267.1 Klebsiella pneumoniae subsp. pneumoniae strain SC-7 plasmid pSC7-KPC, complete sequence
Erwinia_amylovora_CTMF03_1	GCA_002732315.1	AJJI01000025.1 Klebsiella pneumoniae subsp. pneumoniae DSM 30104 = JCM 1662 = NBRC 14940 strain DSM 30104 plasmid pKPt3 Contig00025, whole genome shotgun sequence
Erwinia_amylovora_CTMF03_1	GCA_002732315.1	BK049330.1 TPA_asm: Myoviridae sp. isolate ct8vj1, partial genome
Erwinia_amylovora_CTMF03_1	GCA_002732315.1	NZ_JAAEWB010000012.1 Erwinia amylovora strain Ea12 plasmid pEU30, whole genome shotgun sequence
Erwinia_amylovora_CTMF03_1	GCA_002732315.1	NZ_JAAEWR010000012.1 Erwinia amylovora strain 39-I-II plasmid pEA72, whole genome shotgun sequence
Erwinia_amylovora_CTMF03_1	GCA_002732315.1	NZ_RRGT01000084.1 Escherichia coli strain FWSEC0128 map unlocalized plasmid unnamed2 FWSEC0128_contig00036, whole genome shotgun sequence
Erwinia_amylovora_CTMF03_1	GCA_002732315.1	NZ_JAAEWB010000012.1 Erwinia amylovora strain Ea12 plasmid pEU30, whole genome shotgun sequence
Erwinia_amylovora_CA3R	GCA_002732335.1	NZ_JAAEWB010000012.1 Erwinia amylovora strain Ea12 plasmid pEU30, whole genome shotgun sequence
Erwinia_amylovora_CA3R	GCA_002732335.1	NZ_JAAEWH010000049.1 Erwinia amylovora strain Ea01-03 plasmid pEU30, whole genome shotgun sequence
Erwinia_amylovora_CA3R	GCA_002732335.1	NC_005814.1 Yersinia pestis biovar Microtus str. 91001 plasmid pCRY, complete sequence
Erwinia_amylovora_CA3R	GCA_002732335.1	NZ_JAAEWB010000012.1 Erwinia amylovora strain Ea12 plasmid pEU30, whole genome shotgun sequence
Erwinia_amylovora_CA3R	GCA_002732335.1	KJ685892.1 Salmonella enterica subsp. enterica serovar Hadar strain 139.67 plasmid KVHS-004 plasmid mediated quinolone resistance protein (qnrD1) and regulator protein (rop) genes, complete cds
Erwinia_amylovora_CA3R	GCA_002732335.1	NZ_JAAEWH010000068.1 Erwinia amylovora strain Ea01-03 plasmid pEA4.0, whole genome shotgun sequence
Erwinia_amylovora_CA3R	GCA_002732335.1	NZ_CP030267.1 Klebsiella pneumoniae subsp. pneumoniae strain SC-7 plasmid pSC7-KPC, complete sequence
Erwinia_amylovora_CA3R	GCA_002732335.1	NZ_CP030267.1 Klebsiella pneumoniae subsp. pneumoniae strain SC-7 plasmid pSC7-KPC, complete sequence
Erwinia_amylovora_CA3R	GCA_002732335.1	NZ_JAAEWB010000012.1 Erwinia amylovora strain Ea12 plasmid pEU30, whole genome shotgun sequence
Erwinia_amylovora_CA3R	GCA_002732335.1	NZ_JAAEWB010000012.1 Erwinia amylovora strain Ea12 plasmid pEU30, whole genome shotgun sequence
Erwinia_amylovora_CA3R	GCA_002732335.1	NZ_JAAEWH010000049.1 Erwinia amylovora strain Ea01-03 plasmid pEU30, whole genome shotgun sequence
Erwinia_amylovora_CA3R	GCA_002732335.1	NZ_JAAEWB010000012.1 Erwinia amylovora strain Ea12 plasmid pEU30, whole genome shotgun sequence
Erwinia_amylovora_CA3R	GCA_002732335.1	IMGVR_UViG_3300030005_000023
Erwinia_amylovora_CA3R	GCA_002732335.1	NZ_JAAEWB010000012.1 Erwinia amylovora strain Ea12 plasmid pEU30, whole genome shotgun sequence
Erwinia_amylovora_CA3R	GCA_002732335.1	NZ_CP030267.1 Klebsiella pneumoniae subsp. pneumoniae strain SC-7 plasmid pSC7-KPC, complete sequence
Erwinia_amylovora_CA3R	GCA_002732335.1	CU468130.1 Erwinia tasmaniensis strain ET1/99 complete plasmid pET35
Erwinia_amylovora_CA3R	GCA_002732335.1	NZ_JAAEWB010000012.1 Erwinia amylovora strain Ea12 plasmid pEU30, whole genome shotgun sequence
Erwinia_amylovora_CA3R	GCA_002732335.1	NZ_JAAEWB010000012.1 Erwinia amylovora strain Ea12 plasmid pEU30, whole genome shotgun sequence
Erwinia_amylovora_CA3R	GCA_002732335.1	NZ_JAAEWB010000012.1 Erwinia amylovora strain Ea12 plasmid pEU30, whole genome shotgun sequence
Erwinia_amylovora_CA3R	GCA_002732335.1	AJJI01000025.1 Klebsiella pneumoniae subsp. pneumoniae DSM 30104 = JCM 1662 = NBRC 14940 strain DSM 30104 plasmid pKPt3 Contig00025, whole genome shotgun sequence
Erwinia_amylovora_CA3R	GCA_002732335.1	NZ_JAAEWB010000012.1 Erwinia amylovora strain Ea12 plasmid pEU30, whole genome shotgun sequence
Erwinia_amylovora_CA3R	GCA_002732335.1	BK049330.1 TPA_asm: Myoviridae sp. isolate ct8vj1, partial genome
Erwinia_amylovora_CA3R	GCA_002732335.1	NZ_CP030267.1 Klebsiella pneumoniae subsp. pneumoniae strain SC-7 plasmid pSC7-KPC, complete sequence
Erwinia_amylovora_CA3R	GCA_002732335.1	NZ_JAAEWB010000012.1 Erwinia amylovora strain Ea12 plasmid pEU30, whole genome shotgun sequence
Erwinia_amylovora_CA3R	GCA_002732335.1	NZ_JAAEWB010000012.1 Erwinia amylovora strain Ea12 plasmid pEU30, whole genome shotgun sequence
Erwinia_amylovora_CA3R	GCA_002732335.1	IMGVR_UViG_3300031420_000044
Erwinia_amylovora_CA3R	GCA_002732335.1	NZ_JAAEWB010000012.1 Erwinia amylovora strain Ea12 plasmid pEU30, whole genome shotgun sequence
Erwinia_amylovora_CA3R	GCA_002732335.1	NZ_CP028352.1 Pantoea vagans strain PV989 plasmid pPV989-94, complete sequence
Erwinia_amylovora_CA3R	GCA_002732335.1	NZ_JAAEWB010000012.1 Erwinia amylovora strain Ea12 plasmid pEU30, whole genome shotgun sequence
Erwinia_amylovora_CA3R	GCA_002732335.1	NZ_JAAEWB010000012.1 Erwinia amylovora strain Ea12 plasmid pEU30, whole genome shotgun sequence
Erwinia_amylovora_CA3R	GCA_002732335.1	NZ_JAAEWB010000012.1 Erwinia amylovora strain Ea12 plasmid pEU30, whole genome shotgun sequence
Erwinia_amylovora_RISTBO01_2	GCA_002732365.1	NZ_JAAEWR010000012.1 Erwinia amylovora strain 39-I-II plasmid pEA72, whole genome shotgun sequence
Erwinia_amylovora_RISTBO01_2	GCA_002732365.1	NC_005814.1 Yersinia pestis biovar Microtus str. 91001 plasmid pCRY, complete sequence
Erwinia_amylovora_RISTBO01_2	GCA_002732365.1	NZ_JAAEWB010000012.1 Erwinia amylovora strain Ea12 plasmid pEU30, whole genome shotgun sequence
Erwinia_amylovora_RISTBO01_2	GCA_002732365.1	NZ_JAAEWB010000012.1 Erwinia amylovora strain Ea12 plasmid pEU30, whole genome shotgun sequence
Erwinia_amylovora_RISTBO01_2	GCA_002732365.1	NZ_CP030267.1 Klebsiella pneumoniae subsp. pneumoniae strain SC-7 plasmid pSC7-KPC, complete sequence
Erwinia_amylovora_RISTBO01_2	GCA_002732365.1	CU468130.1 Erwinia tasmaniensis strain ET1/99 complete plasmid pET35
Erwinia_amylovora_RISTBO01_2	GCA_002732365.1	NZ_JAAEWB010000012.1 Erwinia amylovora strain Ea12 plasmid pEU30, whole genome shotgun sequence
Erwinia_amylovora_RISTBO01_2	GCA_002732365.1	NZ_JAAEWB010000012.1 Erwinia amylovora strain Ea12 plasmid pEU30, whole genome shotgun sequence
Erwinia_amylovora_RISTBO01_2	GCA_002732365.1	NZ_JAAEWB010000012.1 Erwinia amylovora strain Ea12 plasmid pEU30, whole genome shotgun sequence
Erwinia_amylovora_RISTBO01_2	GCA_002732365.1	NZ_JAAEWB010000012.1 Erwinia amylovora strain Ea12 plasmid pEU30, whole genome shotgun sequence
Erwinia_amylovora_RISTBO01_2	GCA_002732365.1	NZ_JAAEWH010000049.1 Erwinia amylovora strain Ea01-03 plasmid pEU30, whole genome shotgun sequence
Erwinia_amylovora_RISTBO01_2	GCA_002732365.1	NZ_JAAEWB010000012.1 Erwinia amylovora strain Ea12 plasmid pEU30, whole genome shotgun sequence
Erwinia_amylovora_RISTBO01_2	GCA_002732365.1	NZ_JAAEWB010000012.1 Erwinia amylovora strain Ea12 plasmid pEU30, whole genome shotgun sequence
Erwinia_amylovora_RISTBO01_2	GCA_002732365.1	NZ_JAAEWB010000012.1 Erwinia amylovora strain Ea12 plasmid pEU30, whole genome shotgun sequence
Erwinia_amylovora_RISTBO01_2	GCA_002732365.1	NZ_JAAEWB010000012.1 Erwinia amylovora strain Ea12 plasmid pEU30, whole genome shotgun sequence
Erwinia_amylovora_RISTBO01_2	GCA_002732365.1	NZ_JAAEWB010000012.1 Erwinia amylovora strain Ea12 plasmid pEU30, whole genome shotgun sequence
Erwinia_amylovora_RISTBO01_2	GCA_002732365.1	DTR_651038
Erwinia_amylovora_RISTBO01_2	GCA_002732365.1	NZ_JAAEWH010000068.1 Erwinia amylovora strain Ea01-03 plasmid pEA4.0, whole genome shotgun sequence
Erwinia_amylovora_RISTBO01_2	GCA_002732365.1	NZ_JAAEWB010000012.1 Erwinia amylovora strain Ea12 plasmid pEU30, whole genome shotgun sequence
Erwinia_amylovora_RISTBO01_2	GCA_002732365.1	NZ_CP054046.1 Yersinia massiliensis strain 2011N-4075 plasmid unnamed1, complete sequence
Erwinia_amylovora_RISTBO01_2	GCA_002732365.1	NZ_JAAEWB010000012.1 Erwinia amylovora strain Ea12 plasmid pEU30, whole genome shotgun sequence
Erwinia_amylovora_RISTBO01_2	GCA_002732365.1	CU468130.1 Erwinia tasmaniensis strain ET1/99 complete plasmid pET35
Erwinia_amylovora_RISTBO01_2	GCA_002732365.1	NZ_RRGT01000084.1 Escherichia coli strain FWSEC0128 map unlocalized plasmid unnamed2 FWSEC0128_contig00036, whole genome shotgun sequence
Erwinia_amylovora_RISTBO01_2	GCA_002732365.1	FQ482085.1 Erwinia tasmaniensis phage phiEt88 complete genome
Erwinia_amylovora_RISTBO01_2	GCA_002732365.1	NZ_JAAEWB010000012.1 Erwinia amylovora strain Ea12 plasmid pEU30, whole genome shotgun sequence
Erwinia_amylovora_RISTBO01_2	GCA_002732365.1	NZ_CP030267.1 Klebsiella pneumoniae subsp. pneumoniae strain SC-7 plasmid pSC7-KPC, complete sequence
Erwinia_amylovora_RISTBO01_2	GCA_002732365.1	NZ_JAAEWB010000012.1 Erwinia amylovora strain Ea12 plasmid pEU30, whole genome shotgun sequence
Erwinia_amylovora_RISTBO01_2	GCA_002732365.1	NZ_JAAEWB010000012.1 Erwinia amylovora strain Ea12 plasmid pEU30, whole genome shotgun sequence
Erwinia_amylovora_RISTBO01_2	GCA_002732365.1	NZ_JAAEWB010000012.1 Erwinia amylovora strain Ea12 plasmid pEU30, whole genome shotgun sequence
Erwinia_amylovora_RISTBO01_2	GCA_002732365.1	NZ_JAAEWB010000012.1 Erwinia amylovora strain Ea12 plasmid pEU30, whole genome shotgun sequence
Erwinia_amylovora_RISTBO01_2	GCA_002732365.1	NZ_JAAEWB010000012.1 Erwinia amylovora strain Ea12 plasmid pEU30, whole genome shotgun sequence
Erwinia_amylovora_RISTBO01_2	GCA_002732365.1	NZ_CP030267.1 Klebsiella pneumoniae subsp. pneumoniae strain SC-7 plasmid pSC7-KPC, complete sequence
Erwinia_amylovora_RISTBO01_2	GCA_002732365.1	NZ_JAAEWH010000049.1 Erwinia amylovora strain Ea01-03 plasmid pEU30, whole genome shotgun sequence
Erwinia_amylovora_RISTBO01_2	GCA_002732365.1	NZ_JAAEWB010000012.1 Erwinia amylovora strain Ea12 plasmid pEU30, whole genome shotgun sequence
Erwinia_amylovora_RISTBO01_2	GCA_002732365.1	IMGVR_UViG_3300031151_000085
Erwinia_amylovora_RISTBO01_2	GCA_002732365.1	KJ685892.1 Salmonella enterica subsp. enterica serovar Hadar strain 139.67 plasmid KVHS-004 plasmid mediated quinolone resistance protein (qnrD1) and regulator protein (rop) genes, complete cds
Erwinia_amylovora_RISTBO01_2	GCA_002732365.1	NZ_JAAEWH010000049.1 Erwinia amylovora strain Ea01-03 plasmid pEU30, whole genome shotgun sequence
Erwinia_amylovora_RISTBO01_2	GCA_002732365.1	NZ_JAAEWB010000012.1 Erwinia amylovora strain Ea12 plasmid pEU30, whole genome shotgun sequence
Erwinia_amylovora_RISTBO01_2	GCA_002732365.1	NZ_JAAEWH010000049.1 Erwinia amylovora strain Ea01-03 plasmid pEU30, whole genome shotgun sequence
Erwinia_amylovora_RISTBO01_2	GCA_002732365.1	NZ_JAAEWB010000012.1 Erwinia amylovora strain Ea12 plasmid pEU30, whole genome shotgun sequence
Erwinia_amylovora_RISTBO01_2	GCA_002732365.1	BK049330.1 TPA_asm: Myoviridae sp. isolate ct8vj1, partial genome
Erwinia_amylovora_RISTBO01_2	GCA_002732365.1	CU468130.1 Erwinia tasmaniensis strain ET1/99 complete plasmid pET35
Erwinia_amylovora_RISTBO01_2	GCA_002732365.1	NZ_JAAEWH010000049.1 Erwinia amylovora strain Ea01-03 plasmid pEU30, whole genome shotgun sequence
Erwinia_amylovora_RISTBO01_2	GCA_002732365.1	NZ_JAAEWB010000012.1 Erwinia amylovora strain Ea12 plasmid pEU30, whole genome shotgun sequence
Erwinia_amylovora_RISTBO01_2	GCA_002732365.1	NZ_JAAEWB010000012.1 Erwinia amylovora strain Ea12 plasmid pEU30, whole genome shotgun sequence
Erwinia_amylovora_RISTBO01_2	GCA_002732365.1	NZ_CP028352.1 Pantoea vagans strain PV989 plasmid pPV989-94, complete sequence
Erwinia_amylovora_RISTBO01_2	GCA_002732365.1	NZ_JAAEWB010000012.1 Erwinia amylovora strain Ea12 plasmid pEU30, whole genome shotgun sequence
Erwinia_amylovora_RISTBO01_2	GCA_002732365.1	NZ_JAAEWH010000049.1 Erwinia amylovora strain Ea01-03 plasmid pEU30, whole genome shotgun sequence
Erwinia_amylovora_RISTBO01_2	GCA_002732365.1	NZ_CP030267.1 Klebsiella pneumoniae subsp. pneumoniae strain SC-7 plasmid pSC7-KPC, complete sequence
Erwinia_amylovora_RISTBO01_2	GCA_002732365.1	NZ_JAAEWB010000012.1 Erwinia amylovora strain Ea12 plasmid pEU30, whole genome shotgun sequence
Erwinia_amylovora_RISTBO01_2	GCA_002732365.1	NZ_JAAEWH010000049.1 Erwinia amylovora strain Ea01-03 plasmid pEU30, whole genome shotgun sequence
Erwinia_amylovora_RISTBO01_2	GCA_002732365.1	NZ_JAAEWB010000012.1 Erwinia amylovora strain Ea12 plasmid pEU30, whole genome shotgun sequence
Erwinia_amylovora_RISTBO01_2	GCA_002732365.1	NZ_JAAEWB010000012.1 Erwinia amylovora strain Ea12 plasmid pEU30, whole genome shotgun sequence
Erwinia_amylovora_RISTBO01_2	GCA_002732365.1	NZ_JAAEWB010000012.1 Erwinia amylovora strain Ea12 plasmid pEU30, whole genome shotgun sequence
Erwinia_amylovora_RISTBO01_2	GCA_002732365.1	IMGVR_UViG_3300031420_000044
Erwinia_amylovora_RISTBO01_2	GCA_002732365.1	NZ_JAAEWB010000012.1 Erwinia amylovora strain Ea12 plasmid pEU30, whole genome shotgun sequence
Erwinia_amylovora_RISTBO01_2	GCA_002732365.1	NZ_JAAEWB010000012.1 Erwinia amylovora strain Ea12 plasmid pEU30, whole genome shotgun sequence
Erwinia_amylovora_RISTBO01_2	GCA_002732365.1	NZ_JAAEWH010000049.1 Erwinia amylovora strain Ea01-03 plasmid pEU30, whole genome shotgun sequence
Erwinia_amylovora_RISTBO01_2	GCA_002732365.1	NZ_JAAEWH010000049.1 Erwinia amylovora strain Ea01-03 plasmid pEU30, whole genome shotgun sequence
Erwinia_amylovora_RISTBO01_2	GCA_002732365.1	AJJI01000025.1 Klebsiella pneumoniae subsp. pneumoniae DSM 30104 = JCM 1662 = NBRC 14940 strain DSM 30104 plasmid pKPt3 Contig00025, whole genome shotgun sequence
Erwinia_amylovora_RISTBO01_2	GCA_002732365.1	NZ_JAAEWH010000049.1 Erwinia amylovora strain Ea01-03 plasmid pEU30, whole genome shotgun sequence
Erwinia_amylovora_RISTBO01_2	GCA_002732365.1	NZ_JAAEWH010000049.1 Erwinia amylovora strain Ea01-03 plasmid pEU30, whole genome shotgun sequence
Erwinia_amylovora_RISTBO01_2	GCA_002732365.1	IMGVR_UViG_3300030005_000023
Erwinia_amylovora_RISTBO01_2	GCA_002732365.1	NZ_JAAEWB010000012.1 Erwinia amylovora strain Ea12 plasmid pEU30, whole genome shotgun sequence
Erwinia_amylovora_RISTBO01_2	GCA_002732365.1	NZ_JAAEWB010000012.1 Erwinia amylovora strain Ea12 plasmid pEU30, whole genome shotgun sequence
Erwinia_amylovora_CTBT1_1	GCA_002732385.1	CU468130.1 Erwinia tasmaniensis strain ET1/99 complete plasmid pET35
Erwinia_amylovora_CTBT1_1	GCA_002732385.1	IMGVR_UViG_3300031151_000085
Erwinia_amylovora_CTBT1_1	GCA_002732385.1	NZ_JAAEWB010000012.1 Erwinia amylovora strain Ea12 plasmid pEU30, whole genome shotgun sequence
Erwinia_amylovora_CTBT1_1	GCA_002732385.1	NZ_JAAEWB010000012.1 Erwinia amylovora strain Ea12 plasmid pEU30, whole genome shotgun sequence
Erwinia_amylovora_CTBT1_1	GCA_002732385.1	NZ_CP030267.1 Klebsiella pneumoniae subsp. pneumoniae strain SC-7 plasmid pSC7-KPC, complete sequence
Erwinia_amylovora_CTBT1_1	GCA_002732385.1	NZ_CP030267.1 Klebsiella pneumoniae subsp. pneumoniae strain SC-7 plasmid pSC7-KPC, complete sequence
Erwinia_amylovora_CTBT1_1	GCA_002732385.1	NZ_CP030267.1 Klebsiella pneumoniae subsp. pneumoniae strain SC-7 plasmid pSC7-KPC, complete sequence
Erwinia_amylovora_CTBT1_1	GCA_002732385.1	NZ_JAAEWB010000012.1 Erwinia amylovora strain Ea12 plasmid pEU30, whole genome shotgun sequence
Erwinia_amylovora_CTBT1_1	GCA_002732385.1	NZ_JAAEWB010000012.1 Erwinia amylovora strain Ea12 plasmid pEU30, whole genome shotgun sequence
Erwinia_amylovora_CTBT1_1	GCA_002732385.1	NZ_JAAEWB010000012.1 Erwinia amylovora strain Ea12 plasmid pEU30, whole genome shotgun sequence
Erwinia_amylovora_CTBT1_1	GCA_002732385.1	AJJI01000025.1 Klebsiella pneumoniae subsp. pneumoniae DSM 30104 = JCM 1662 = NBRC 14940 strain DSM 30104 plasmid pKPt3 Contig00025, whole genome shotgun sequence
Erwinia_amylovora_CTBT1_1	GCA_002732385.1	NZ_CP030267.1 Klebsiella pneumoniae subsp. pneumoniae strain SC-7 plasmid pSC7-KPC, complete sequence
Erwinia_amylovora_CTBT1_1	GCA_002732385.1	NZ_JAAEWH010000049.1 Erwinia amylovora strain Ea01-03 plasmid pEU30, whole genome shotgun sequence
Erwinia_amylovora_CTBT1_1	GCA_002732385.1	NZ_JAAEWH010000049.1 Erwinia amylovora strain Ea01-03 plasmid pEU30, whole genome shotgun sequence
Erwinia_amylovora_CTBT1_1	GCA_002732385.1	NZ_JAAEWH010000049.1 Erwinia amylovora strain Ea01-03 plasmid pEU30, whole genome shotgun sequence
Erwinia_amylovora_CTBT1_1	GCA_002732385.1	DTR_651038
Erwinia_amylovora_CTBT1_1	GCA_002732385.1	NZ_JAAEWB010000012.1 Erwinia amylovora strain Ea12 plasmid pEU30, whole genome shotgun sequence
Erwinia_amylovora_CTBT1_1	GCA_002732385.1	NZ_JAAEWB010000012.1 Erwinia amylovora strain Ea12 plasmid pEU30, whole genome shotgun sequence
Erwinia_amylovora_CTBT1_1	GCA_002732385.1	CU468130.1 Erwinia tasmaniensis strain ET1/99 complete plasmid pET35
Erwinia_amylovora_CTBT1_1	GCA_002732385.1	NZ_JAAEWB010000012.1 Erwinia amylovora strain Ea12 plasmid pEU30, whole genome shotgun sequence
Erwinia_amylovora_CTBT1_1	GCA_002732385.1	NZ_JAAEWH010000049.1 Erwinia amylovora strain Ea01-03 plasmid pEU30, whole genome shotgun sequence
Erwinia_amylovora_CTBT1_1	GCA_002732385.1	NZ_JAAEWB010000012.1 Erwinia amylovora strain Ea12 plasmid pEU30, whole genome shotgun sequence
Erwinia_amylovora_CTBT1_1	GCA_002732385.1	NZ_JAAEWB010000012.1 Erwinia amylovora strain Ea12 plasmid pEU30, whole genome shotgun sequence
Erwinia_amylovora_CTBT1_1	GCA_002732385.1	FQ482085.1 Erwinia tasmaniensis phage phiEt88 complete genome
Erwinia_amylovora_CTBT1_1	GCA_002732385.1	NZ_JAAEWB010000012.1 Erwinia amylovora strain Ea12 plasmid pEU30, whole genome shotgun sequence
Erwinia_amylovora_CTBT1_1	GCA_002732385.1	NZ_JAAEWB010000012.1 Erwinia amylovora strain Ea12 plasmid pEU30, whole genome shotgun sequence
Erwinia_amylovora_CTBT1_1	GCA_002732385.1	KJ685892.1 Salmonella enterica subsp. enterica serovar Hadar strain 139.67 plasmid KVHS-004 plasmid mediated quinolone resistance protein (qnrD1) and regulator protein (rop) genes, complete cds
Erwinia_amylovora_CTBT1_1	GCA_002732385.1	NZ_CP028352.1 Pantoea vagans strain PV989 plasmid pPV989-94, complete sequence
Erwinia_amylovora_CTBT1_1	GCA_002732385.1	NZ_JAAEWH010000049.1 Erwinia amylovora strain Ea01-03 plasmid pEU30, whole genome shotgun sequence
Erwinia_amylovora_CTBT1_1	GCA_002732385.1	NZ_JAAEWB010000012.1 Erwinia amylovora strain Ea12 plasmid pEU30, whole genome shotgun sequence
Erwinia_amylovora_CTBT1_1	GCA_002732385.1	NZ_JAAEWB010000012.1 Erwinia amylovora strain Ea12 plasmid pEU30, whole genome shotgun sequence
Erwinia_amylovora_CTBT1_1	GCA_002732385.1	BK049330.1 TPA_asm: Myoviridae sp. isolate ct8vj1, partial genome
Erwinia_amylovora_CTBT1_1	GCA_002732385.1	NZ_JAAEWB010000012.1 Erwinia amylovora strain Ea12 plasmid pEU30, whole genome shotgun sequence
Erwinia_amylovora_CTBT1_1	GCA_002732385.1	NZ_JAAEWB010000012.1 Erwinia amylovora strain Ea12 plasmid pEU30, whole genome shotgun sequence
Erwinia_amylovora_CTBT1_1	GCA_002732385.1	NC_005814.1 Yersinia pestis biovar Microtus str. 91001 plasmid pCRY, complete sequence
Erwinia_amylovora_CTBT1_1	GCA_002732385.1	NZ_JAAEWH010000049.1 Erwinia amylovora strain Ea01-03 plasmid pEU30, whole genome shotgun sequence
Erwinia_amylovora_CTBT1_1	GCA_002732385.1	NZ_JAAEWH010000049.1 Erwinia amylovora strain Ea01-03 plasmid pEU30, whole genome shotgun sequence
Erwinia_amylovora_CTBT1_1	GCA_002732385.1	NZ_JAAEWB010000012.1 Erwinia amylovora strain Ea12 plasmid pEU30, whole genome shotgun sequence
Erwinia_amylovora_CTBT1_1	GCA_002732385.1	NZ_JAAEWB010000012.1 Erwinia amylovora strain Ea12 plasmid pEU30, whole genome shotgun sequence
Erwinia_amylovora_CTBT1_1	GCA_002732385.1	NZ_JAAEWH010000049.1 Erwinia amylovora strain Ea01-03 plasmid pEU30, whole genome shotgun sequence
Erwinia_amylovora_CTBT1_1	GCA_002732385.1	NZ_CP030267.1 Klebsiella pneumoniae subsp. pneumoniae strain SC-7 plasmid pSC7-KPC, complete sequence
Erwinia_amylovora_CTBT1_1	GCA_002732385.1	NZ_JAAEWR010000012.1 Erwinia amylovora strain 39-I-II plasmid pEA72, whole genome shotgun sequence
Erwinia_amylovora_CTBT1_1	GCA_002732385.1	NZ_JAAEWB010000012.1 Erwinia amylovora strain Ea12 plasmid pEU30, whole genome shotgun sequence
Erwinia_amylovora_CTBT1_1	GCA_002732385.1	NZ_JAAEWB010000012.1 Erwinia amylovora strain Ea12 plasmid pEU30, whole genome shotgun sequence
Erwinia_amylovora_CTBT1_1	GCA_002732385.1	NZ_JAAEWH010000049.1 Erwinia amylovora strain Ea01-03 plasmid pEU30, whole genome shotgun sequence
Erwinia_amylovora_CTBT1_1	GCA_002732385.1	NZ_JAAEWB010000012.1 Erwinia amylovora strain Ea12 plasmid pEU30, whole genome shotgun sequence
Erwinia_amylovora_CTBT1_1	GCA_002732385.1	NZ_JAAEWB010000012.1 Erwinia amylovora strain Ea12 plasmid pEU30, whole genome shotgun sequence
Erwinia_amylovora_CTBT1_1	GCA_002732385.1	NZ_CP054046.1 Yersinia massiliensis strain 2011N-4075 plasmid unnamed1, complete sequence
Erwinia_amylovora_CTBT1_1	GCA_002732385.1	NZ_JAAEWH010000049.1 Erwinia amylovora strain Ea01-03 plasmid pEU30, whole genome shotgun sequence
Erwinia_amylovora_CTBT1_1	GCA_002732385.1	NZ_JAAEWB010000012.1 Erwinia amylovora strain Ea12 plasmid pEU30, whole genome shotgun sequence
Erwinia_amylovora_CTBT1_1	GCA_002732385.1	NZ_JAAEWB010000012.1 Erwinia amylovora strain Ea12 plasmid pEU30, whole genome shotgun sequence
Erwinia_amylovora_CTBT1_1	GCA_002732385.1	NZ_JAAEWB010000012.1 Erwinia amylovora strain Ea12 plasmid pEU30, whole genome shotgun sequence
Erwinia_amylovora_CTBT1_1	GCA_002732385.1	NZ_JAAEWH010000049.1 Erwinia amylovora strain Ea01-03 plasmid pEU30, whole genome shotgun sequence
Erwinia_amylovora_CTBT1_1	GCA_002732385.1	NZ_JAAEWB010000012.1 Erwinia amylovora strain Ea12 plasmid pEU30, whole genome shotgun sequence
Erwinia_amylovora_CTBT1_1	GCA_002732385.1	NZ_JAAEWB010000012.1 Erwinia amylovora strain Ea12 plasmid pEU30, whole genome shotgun sequence
Erwinia_amylovora_CTBT1_1	GCA_002732385.1	NZ_RRGT01000084.1 Escherichia coli strain FWSEC0128 map unlocalized plasmid unnamed2 FWSEC0128_contig00036, whole genome shotgun sequence
Erwinia_amylovora_UT5P4	GCA_002732405.1	NZ_JAAEWR010000012.1 Erwinia amylovora strain 39-I-II plasmid pEA72, whole genome shotgun sequence
Erwinia_amylovora_UT5P4	GCA_002732405.1	NZ_JAAEWB010000012.1 Erwinia amylovora strain Ea12 plasmid pEU30, whole genome shotgun sequence
Erwinia_amylovora_UT5P4	GCA_002732405.1	KJ685892.1 Salmonella enterica subsp. enterica serovar Hadar strain 139.67 plasmid KVHS-004 plasmid mediated quinolone resistance protein (qnrD1) and regulator protein (rop) genes, complete cds
Erwinia_amylovora_UT5P4	GCA_002732405.1	NZ_CP030267.1 Klebsiella pneumoniae subsp. pneumoniae strain SC-7 plasmid pSC7-KPC, complete sequence
Erwinia_amylovora_UT5P4	GCA_002732405.1	NZ_JAAEWB010000012.1 Erwinia amylovora strain Ea12 plasmid pEU30, whole genome shotgun sequence
Erwinia_amylovora_UT5P4	GCA_002732405.1	NZ_JAAEWH010000068.1 Erwinia amylovora strain Ea01-03 plasmid pEA4.0, whole genome shotgun sequence
Erwinia_amylovora_UT5P4	GCA_002732405.1	IMGVR_UViG_3300031420_000044
Erwinia_amylovora_UT5P4	GCA_002732405.1	NZ_CP054046.1 Yersinia massiliensis strain 2011N-4075 plasmid unnamed1, complete sequence
Erwinia_amylovora_UT5P4	GCA_002732405.1	CU468130.1 Erwinia tasmaniensis strain ET1/99 complete plasmid pET35
Erwinia_amylovora_UT5P4	GCA_002732405.1	CU468130.1 Erwinia tasmaniensis strain ET1/99 complete plasmid pET35
Erwinia_amylovora_UT5P4	GCA_002732405.1	BK049330.1 TPA_asm: Myoviridae sp. isolate ct8vj1, partial genome
Erwinia_amylovora_UT5P4	GCA_002732405.1	NC_005814.1 Yersinia pestis biovar Microtus str. 91001 plasmid pCRY, complete sequence
Erwinia_amylovora_UT5P4	GCA_002732405.1	CU468130.1 Erwinia tasmaniensis strain ET1/99 complete plasmid pET35
Erwinia_amylovora_UT5P4	GCA_002732405.1	NZ_JAAEWB010000012.1 Erwinia amylovora strain Ea12 plasmid pEU30, whole genome shotgun sequence
Erwinia_amylovora_UT5P4	GCA_002732405.1	CU468130.1 Erwinia tasmaniensis strain ET1/99 complete plasmid pET35
Erwinia_amylovora_UT5P4	GCA_002732405.1	NZ_CP028352.1 Pantoea vagans strain PV989 plasmid pPV989-94, complete sequence
Erwinia_amylovora_OR6	GCA_002732425.1	NZ_JAAEWH010000049.1 Erwinia amylovora strain Ea01-03 plasmid pEU30, whole genome shotgun sequence
Erwinia_amylovora_OR6	GCA_002732425.1	NZ_CP030267.1 Klebsiella pneumoniae subsp. pneumoniae strain SC-7 plasmid pSC7-KPC, complete sequence
Erwinia_amylovora_OR6	GCA_002732425.1	NZ_JAAEWH010000049.1 Erwinia amylovora strain Ea01-03 plasmid pEU30, whole genome shotgun sequence
Erwinia_amylovora_OR6	GCA_002732425.1	CU468130.1 Erwinia tasmaniensis strain ET1/99 complete plasmid pET35
Erwinia_amylovora_OR6	GCA_002732425.1	NZ_JAAEWB010000012.1 Erwinia amylovora strain Ea12 plasmid pEU30, whole genome shotgun sequence
Erwinia_amylovora_OR6	GCA_002732425.1	NZ_JAAEWB010000012.1 Erwinia amylovora strain Ea12 plasmid pEU30, whole genome shotgun sequence
Erwinia_amylovora_OR6	GCA_002732425.1	NC_005814.1 Yersinia pestis biovar Microtus str. 91001 plasmid pCRY, complete sequence
Erwinia_amylovora_OR6	GCA_002732425.1	NZ_JAAEWB010000012.1 Erwinia amylovora strain Ea12 plasmid pEU30, whole genome shotgun sequence
Erwinia_amylovora_OR6	GCA_002732425.1	NZ_JAAEWB010000012.1 Erwinia amylovora strain Ea12 plasmid pEU30, whole genome shotgun sequence
Erwinia_amylovora_OR6	GCA_002732425.1	NZ_JAAEWB010000012.1 Erwinia amylovora strain Ea12 plasmid pEU30, whole genome shotgun sequence
Erwinia_amylovora_OR6	GCA_002732425.1	NZ_RRGT01000084.1 Escherichia coli strain FWSEC0128 map unlocalized plasmid unnamed2 FWSEC0128_contig00036, whole genome shotgun sequence
Erwinia_amylovora_OR6	GCA_002732425.1	NZ_CP030267.1 Klebsiella pneumoniae subsp. pneumoniae strain SC-7 plasmid pSC7-KPC, complete sequence
Erwinia_amylovora_OR6	GCA_002732425.1	NZ_JAAEWB010000012.1 Erwinia amylovora strain Ea12 plasmid pEU30, whole genome shotgun sequence
Erwinia_amylovora_OR6	GCA_002732425.1	NZ_CP028352.1 Pantoea vagans strain PV989 plasmid pPV989-94, complete sequence
Erwinia_amylovora_OR6	GCA_002732425.1	NZ_JAAEWB010000012.1 Erwinia amylovora strain Ea12 plasmid pEU30, whole genome shotgun sequence
Erwinia_amylovora_OR6	GCA_002732425.1	IMGVR_UViG_3300031420_000044
Erwinia_amylovora_OR6	GCA_002732425.1	NZ_JAAEWB010000012.1 Erwinia amylovora strain Ea12 plasmid pEU30, whole genome shotgun sequence
Erwinia_amylovora_OR6	GCA_002732425.1	NZ_JAAEWH010000049.1 Erwinia amylovora strain Ea01-03 plasmid pEU30, whole genome shotgun sequence
Erwinia_amylovora_OR6	GCA_002732425.1	KJ685892.1 Salmonella enterica subsp. enterica serovar Hadar strain 139.67 plasmid KVHS-004 plasmid mediated quinolone resistance protein (qnrD1) and regulator protein (rop) genes, complete cds
Erwinia_amylovora_OR6	GCA_002732425.1	NZ_JAAEWH010000049.1 Erwinia amylovora strain Ea01-03 plasmid pEU30, whole genome shotgun sequence
Erwinia_amylovora_OR6	GCA_002732425.1	NZ_JAAEWB010000012.1 Erwinia amylovora strain Ea12 plasmid pEU30, whole genome shotgun sequence
Erwinia_amylovora_OR6	GCA_002732425.1	NZ_JAAEWB010000012.1 Erwinia amylovora strain Ea12 plasmid pEU30, whole genome shotgun sequence
Erwinia_amylovora_OR6	GCA_002732425.1	NZ_JAAEWB010000012.1 Erwinia amylovora strain Ea12 plasmid pEU30, whole genome shotgun sequence
Erwinia_amylovora_OR6	GCA_002732425.1	NZ_CP030267.1 Klebsiella pneumoniae subsp. pneumoniae strain SC-7 plasmid pSC7-KPC, complete sequence
Erwinia_amylovora_OR6	GCA_002732425.1	NZ_JAAEWR010000012.1 Erwinia amylovora strain 39-I-II plasmid pEA72, whole genome shotgun sequence
Erwinia_amylovora_OR6	GCA_002732425.1	NZ_JAAEWB010000012.1 Erwinia amylovora strain Ea12 plasmid pEU30, whole genome shotgun sequence
Erwinia_amylovora_OR6	GCA_002732425.1	NZ_JAAEWH010000049.1 Erwinia amylovora strain Ea01-03 plasmid pEU30, whole genome shotgun sequence
Erwinia_amylovora_OR6	GCA_002732425.1	NZ_JAAEWB010000012.1 Erwinia amylovora strain Ea12 plasmid pEU30, whole genome shotgun sequence
Erwinia_amylovora_OR6	GCA_002732425.1	NZ_JAAEWB010000012.1 Erwinia amylovora strain Ea12 plasmid pEU30, whole genome shotgun sequence
Erwinia_amylovora_OR6	GCA_002732425.1	CU468130.1 Erwinia tasmaniensis strain ET1/99 complete plasmid pET35
Erwinia_amylovora_OR6	GCA_002732425.1	NZ_JAAEWH010000049.1 Erwinia amylovora strain Ea01-03 plasmid pEU30, whole genome shotgun sequence
Erwinia_amylovora_OR6	GCA_002732425.1	NZ_CP054046.1 Yersinia massiliensis strain 2011N-4075 plasmid unnamed1, complete sequence
Erwinia_amylovora_OR6	GCA_002732425.1	NZ_JAAEWB010000012.1 Erwinia amylovora strain Ea12 plasmid pEU30, whole genome shotgun sequence
Erwinia_amylovora_OR6	GCA_002732425.1	NZ_JAAEWB010000012.1 Erwinia amylovora strain Ea12 plasmid pEU30, whole genome shotgun sequence
Erwinia_amylovora_OR6	GCA_002732425.1	NZ_JAAEWB010000012.1 Erwinia amylovora strain Ea12 plasmid pEU30, whole genome shotgun sequence
Erwinia_amylovora_OR6	GCA_002732425.1	NZ_JAAEWH010000068.1 Erwinia amylovora strain Ea01-03 plasmid pEA4.0, whole genome shotgun sequence
Erwinia_amylovora_OR6	GCA_002732425.1	NZ_JAAEWH010000049.1 Erwinia amylovora strain Ea01-03 plasmid pEU30, whole genome shotgun sequence
Erwinia_amylovora_OR6	GCA_002732425.1	NZ_JAAEWH010000049.1 Erwinia amylovora strain Ea01-03 plasmid pEU30, whole genome shotgun sequence
Erwinia_amylovora_OR6	GCA_002732425.1	NZ_CP030267.1 Klebsiella pneumoniae subsp. pneumoniae strain SC-7 plasmid pSC7-KPC, complete sequence
Erwinia_amylovora_OR6	GCA_002732425.1	IMGVR_UViG_3300030005_000023
Erwinia_amylovora_OR6	GCA_002732425.1	DTR_651038
Erwinia_amylovora_OR6	GCA_002732425.1	IMGVR_UViG_3300031151_000085
Erwinia_amylovora_OR6	GCA_002732425.1	CU468130.1 Erwinia tasmaniensis strain ET1/99 complete plasmid pET35
Erwinia_amylovora_OR6	GCA_002732425.1	NZ_JAAEWH010000049.1 Erwinia amylovora strain Ea01-03 plasmid pEU30, whole genome shotgun sequence
Erwinia_amylovora_OR6	GCA_002732425.1	NZ_JAAEWB010000012.1 Erwinia amylovora strain Ea12 plasmid pEU30, whole genome shotgun sequence
Erwinia_amylovora_OR6	GCA_002732425.1	NZ_JAAEWB010000012.1 Erwinia amylovora strain Ea12 plasmid pEU30, whole genome shotgun sequence
Erwinia_amylovora_OR6	GCA_002732425.1	NZ_JAAEWB010000012.1 Erwinia amylovora strain Ea12 plasmid pEU30, whole genome shotgun sequence
Erwinia_amylovora_OR6	GCA_002732425.1	NZ_JAAEWB010000012.1 Erwinia amylovora strain Ea12 plasmid pEU30, whole genome shotgun sequence
Erwinia_amylovora_OR6	GCA_002732425.1	NZ_JAAEWB010000012.1 Erwinia amylovora strain Ea12 plasmid pEU30, whole genome shotgun sequence
Erwinia_amylovora_OR6	GCA_002732425.1	NZ_JAAEWB010000012.1 Erwinia amylovora strain Ea12 plasmid pEU30, whole genome shotgun sequence
Erwinia_amylovora_OR6	GCA_002732425.1	FQ482085.1 Erwinia tasmaniensis phage phiEt88 complete genome
Erwinia_amylovora_OR6	GCA_002732425.1	NZ_JAAEWH010000049.1 Erwinia amylovora strain Ea01-03 plasmid pEU30, whole genome shotgun sequence
Erwinia_amylovora_OR6	GCA_002732425.1	NZ_JAAEWB010000012.1 Erwinia amylovora strain Ea12 plasmid pEU30, whole genome shotgun sequence
Erwinia_amylovora_OR6	GCA_002732425.1	NZ_JAAEWB010000012.1 Erwinia amylovora strain Ea12 plasmid pEU30, whole genome shotgun sequence
Erwinia_amylovora_OR6	GCA_002732425.1	NZ_JAAEWB010000012.1 Erwinia amylovora strain Ea12 plasmid pEU30, whole genome shotgun sequence
Erwinia_amylovora_OR6	GCA_002732425.1	AJJI01000025.1 Klebsiella pneumoniae subsp. pneumoniae DSM 30104 = JCM 1662 = NBRC 14940 strain DSM 30104 plasmid pKPt3 Contig00025, whole genome shotgun sequence
Erwinia_amylovora_OR6	GCA_002732425.1	NZ_JAAEWB010000012.1 Erwinia amylovora strain Ea12 plasmid pEU30, whole genome shotgun sequence
Erwinia_amylovora_OR6	GCA_002732425.1	NZ_JAAEWB010000012.1 Erwinia amylovora strain Ea12 plasmid pEU30, whole genome shotgun sequence
Erwinia_amylovora_OR6	GCA_002732425.1	NZ_CP030267.1 Klebsiella pneumoniae subsp. pneumoniae strain SC-7 plasmid pSC7-KPC, complete sequence
Erwinia_amylovora_OR6	GCA_002732425.1	BK049330.1 TPA_asm: Myoviridae sp. isolate ct8vj1, partial genome
Erwinia_amylovora_NHWL02_2	GCA_002732435.1	NZ_JAAEWB010000012.1 Erwinia amylovora strain Ea12 plasmid pEU30, whole genome shotgun sequence
Erwinia_amylovora_NHWL02_2	GCA_002732435.1	NZ_JAAEWB010000012.1 Erwinia amylovora strain Ea12 plasmid pEU30, whole genome shotgun sequence
Erwinia_amylovora_NHWL02_2	GCA_002732435.1	NZ_CP054046.1 Yersinia massiliensis strain 2011N-4075 plasmid unnamed1, complete sequence
Erwinia_amylovora_NHWL02_2	GCA_002732435.1	NZ_JAAEWB010000012.1 Erwinia amylovora strain Ea12 plasmid pEU30, whole genome shotgun sequence
Erwinia_amylovora_NHWL02_2	GCA_002732435.1	NZ_CP030267.1 Klebsiella pneumoniae subsp. pneumoniae strain SC-7 plasmid pSC7-KPC, complete sequence
Erwinia_amylovora_NHWL02_2	GCA_002732435.1	NZ_JAAEWB010000012.1 Erwinia amylovora strain Ea12 plasmid pEU30, whole genome shotgun sequence
Erwinia_amylovora_NHWL02_2	GCA_002732435.1	NZ_JAAEWB010000012.1 Erwinia amylovora strain Ea12 plasmid pEU30, whole genome shotgun sequence
Erwinia_amylovora_NHWL02_2	GCA_002732435.1	CU468130.1 Erwinia tasmaniensis strain ET1/99 complete plasmid pET35
Erwinia_amylovora_NHWL02_2	GCA_002732435.1	NZ_JAAEWB010000012.1 Erwinia amylovora strain Ea12 plasmid pEU30, whole genome shotgun sequence
Erwinia_amylovora_NHWL02_2	GCA_002732435.1	NZ_CP030267.1 Klebsiella pneumoniae subsp. pneumoniae strain SC-7 plasmid pSC7-KPC, complete sequence
Erwinia_amylovora_NHWL02_2	GCA_002732435.1	NZ_JAAEWB010000012.1 Erwinia amylovora strain Ea12 plasmid pEU30, whole genome shotgun sequence
Erwinia_amylovora_NHWL02_2	GCA_002732435.1	NZ_JAAEWH010000049.1 Erwinia amylovora strain Ea01-03 plasmid pEU30, whole genome shotgun sequence
Erwinia_amylovora_NHWL02_2	GCA_002732435.1	FQ482085.1 Erwinia tasmaniensis phage phiEt88 complete genome
Erwinia_amylovora_NHWL02_2	GCA_002732435.1	NZ_JAAEWH010000049.1 Erwinia amylovora strain Ea01-03 plasmid pEU30, whole genome shotgun sequence
Erwinia_amylovora_NHWL02_2	GCA_002732435.1	NZ_CP030267.1 Klebsiella pneumoniae subsp. pneumoniae strain SC-7 plasmid pSC7-KPC, complete sequence
Erwinia_amylovora_NHWL02_2	GCA_002732435.1	NZ_JAAEWB010000012.1 Erwinia amylovora strain Ea12 plasmid pEU30, whole genome shotgun sequence
Erwinia_amylovora_NHWL02_2	GCA_002732435.1	NZ_JAAEWH010000049.1 Erwinia amylovora strain Ea01-03 plasmid pEU30, whole genome shotgun sequence
Erwinia_amylovora_NHWL02_2	GCA_002732435.1	NZ_JAAEWB010000012.1 Erwinia amylovora strain Ea12 plasmid pEU30, whole genome shotgun sequence
Erwinia_amylovora_NHWL02_2	GCA_002732435.1	NZ_CP030267.1 Klebsiella pneumoniae subsp. pneumoniae strain SC-7 plasmid pSC7-KPC, complete sequence
Erwinia_amylovora_NHWL02_2	GCA_002732435.1	NZ_JAAEWB010000012.1 Erwinia amylovora strain Ea12 plasmid pEU30, whole genome shotgun sequence
Erwinia_amylovora_NHWL02_2	GCA_002732435.1	NZ_JAAEWB010000012.1 Erwinia amylovora strain Ea12 plasmid pEU30, whole genome shotgun sequence
Erwinia_amylovora_NHWL02_2	GCA_002732435.1	NZ_JAAEWB010000012.1 Erwinia amylovora strain Ea12 plasmid pEU30, whole genome shotgun sequence
Erwinia_amylovora_NHWL02_2	GCA_002732435.1	NZ_JAAEWH010000049.1 Erwinia amylovora strain Ea01-03 plasmid pEU30, whole genome shotgun sequence
Erwinia_amylovora_NHWL02_2	GCA_002732435.1	NZ_JAAEWB010000012.1 Erwinia amylovora strain Ea12 plasmid pEU30, whole genome shotgun sequence
Erwinia_amylovora_NHWL02_2	GCA_002732435.1	NZ_JAAEWB010000012.1 Erwinia amylovora strain Ea12 plasmid pEU30, whole genome shotgun sequence
Erwinia_amylovora_NHWL02_2	GCA_002732435.1	CU468130.1 Erwinia tasmaniensis strain ET1/99 complete plasmid pET35
Erwinia_amylovora_NHWL02_2	GCA_002732435.1	NZ_JAAEWB010000012.1 Erwinia amylovora strain Ea12 plasmid pEU30, whole genome shotgun sequence
Erwinia_amylovora_NHWL02_2	GCA_002732435.1	NZ_JAAEWB010000012.1 Erwinia amylovora strain Ea12 plasmid pEU30, whole genome shotgun sequence
Erwinia_amylovora_NHWL02_2	GCA_002732435.1	NZ_JAAEWB010000012.1 Erwinia amylovora strain Ea12 plasmid pEU30, whole genome shotgun sequence
Erwinia_amylovora_NHWL02_2	GCA_002732435.1	NZ_JAAEWB010000012.1 Erwinia amylovora strain Ea12 plasmid pEU30, whole genome shotgun sequence
Erwinia_amylovora_NHWL02_2	GCA_002732435.1	NZ_JAAEWR010000012.1 Erwinia amylovora strain 39-I-II plasmid pEA72, whole genome shotgun sequence
Erwinia_amylovora_NHWL02_2	GCA_002732435.1	NZ_JAAEWH010000049.1 Erwinia amylovora strain Ea01-03 plasmid pEU30, whole genome shotgun sequence
Erwinia_amylovora_NHWL02_2	GCA_002732435.1	NZ_JAAEWB010000012.1 Erwinia amylovora strain Ea12 plasmid pEU30, whole genome shotgun sequence
Erwinia_amylovora_NHWL02_2	GCA_002732435.1	NZ_JAAEWB010000012.1 Erwinia amylovora strain Ea12 plasmid pEU30, whole genome shotgun sequence
Erwinia_amylovora_NHWL02_2	GCA_002732435.1	NZ_JAAEWH010000049.1 Erwinia amylovora strain Ea01-03 plasmid pEU30, whole genome shotgun sequence
Erwinia_amylovora_NHWL02_2	GCA_002732435.1	NZ_JAAEWB010000012.1 Erwinia amylovora strain Ea12 plasmid pEU30, whole genome shotgun sequence
Erwinia_amylovora_NHWL02_2	GCA_002732435.1	NZ_JAAEWH010000049.1 Erwinia amylovora strain Ea01-03 plasmid pEU30, whole genome shotgun sequence
Erwinia_amylovora_NHWL02_2	GCA_002732435.1	BK049330.1 TPA_asm: Myoviridae sp. isolate ct8vj1, partial genome
Erwinia_amylovora_NHWL02_2	GCA_002732435.1	NZ_JAAEWH010000049.1 Erwinia amylovora strain Ea01-03 plasmid pEU30, whole genome shotgun sequence
Erwinia_amylovora_NHWL02_2	GCA_002732435.1	DTR_651038
Erwinia_amylovora_NHWL02_2	GCA_002732435.1	NZ_CP028352.1 Pantoea vagans strain PV989 plasmid pPV989-94, complete sequence
Erwinia_amylovora_NHWL02_2	GCA_002732435.1	NZ_JAAEWB010000012.1 Erwinia amylovora strain Ea12 plasmid pEU30, whole genome shotgun sequence
Erwinia_amylovora_NHWL02_2	GCA_002732435.1	IMGVR_UViG_3300031151_000085
Erwinia_amylovora_NHWL02_2	GCA_002732435.1	AJJI01000025.1 Klebsiella pneumoniae subsp. pneumoniae DSM 30104 = JCM 1662 = NBRC 14940 strain DSM 30104 plasmid pKPt3 Contig00025, whole genome shotgun sequence
Erwinia_amylovora_NHWL02_2	GCA_002732435.1	NZ_CP030267.1 Klebsiella pneumoniae subsp. pneumoniae strain SC-7 plasmid pSC7-KPC, complete sequence
Erwinia_amylovora_NHWL02_2	GCA_002732435.1	NZ_JAAEWB010000012.1 Erwinia amylovora strain Ea12 plasmid pEU30, whole genome shotgun sequence
Erwinia_amylovora_NHWL02_2	GCA_002732435.1	NZ_JAAEWB010000012.1 Erwinia amylovora strain Ea12 plasmid pEU30, whole genome shotgun sequence
Erwinia_amylovora_NHWL02_2	GCA_002732435.1	NZ_RRGT01000084.1 Escherichia coli strain FWSEC0128 map unlocalized plasmid unnamed2 FWSEC0128_contig00036, whole genome shotgun sequence
Erwinia_amylovora_NHWL02_2	GCA_002732435.1	NC_005814.1 Yersinia pestis biovar Microtus str. 91001 plasmid pCRY, complete sequence
Erwinia_amylovora_NHWL02_2	GCA_002732435.1	NZ_JAAEWH010000049.1 Erwinia amylovora strain Ea01-03 plasmid pEU30, whole genome shotgun sequence
Erwinia_amylovora_NHWL02_2	GCA_002732435.1	KJ685892.1 Salmonella enterica subsp. enterica serovar Hadar strain 139.67 plasmid KVHS-004 plasmid mediated quinolone resistance protein (qnrD1) and regulator protein (rop) genes, complete cds
Erwinia_amylovora_NHWL02_2	GCA_002732435.1	NZ_JAAEWH010000049.1 Erwinia amylovora strain Ea01-03 plasmid pEU30, whole genome shotgun sequence
Erwinia_amylovora_OR1	GCA_002732445.1	NZ_JAAEWB010000012.1 Erwinia amylovora strain Ea12 plasmid pEU30, whole genome shotgun sequence
Erwinia_amylovora_OR1	GCA_002732445.1	NZ_JAAEWB010000012.1 Erwinia amylovora strain Ea12 plasmid pEU30, whole genome shotgun sequence
Erwinia_amylovora_OR1	GCA_002732445.1	NC_011148.1 Salmonella enterica subsp. enterica serovar Agona str. SL483 plasmid unnamed, complete sequence
Erwinia_amylovora_OR1	GCA_002732445.1	NZ_JAAEWB010000012.1 Erwinia amylovora strain Ea12 plasmid pEU30, whole genome shotgun sequence
Erwinia_amylovora_OR1	GCA_002732445.1	NZ_CP030267.1 Klebsiella pneumoniae subsp. pneumoniae strain SC-7 plasmid pSC7-KPC, complete sequence
Erwinia_amylovora_OR1	GCA_002732445.1	NZ_JAAEWB010000012.1 Erwinia amylovora strain Ea12 plasmid pEU30, whole genome shotgun sequence
Erwinia_amylovora_OR1	GCA_002732445.1	CU468130.1 Erwinia tasmaniensis strain ET1/99 complete plasmid pET35
Erwinia_amylovora_OR1	GCA_002732445.1	NZ_JAAEWB010000012.1 Erwinia amylovora strain Ea12 plasmid pEU30, whole genome shotgun sequence
Erwinia_amylovora_OR1	GCA_002732445.1	NZ_JAAEWB010000012.1 Erwinia amylovora strain Ea12 plasmid pEU30, whole genome shotgun sequence
Erwinia_amylovora_OR1	GCA_002732445.1	NZ_JAAEWR010000012.1 Erwinia amylovora strain 39-I-II plasmid pEA72, whole genome shotgun sequence
Erwinia_amylovora_OR1	GCA_002732445.1	NZ_JAAEWH010000049.1 Erwinia amylovora strain Ea01-03 plasmid pEU30, whole genome shotgun sequence
Erwinia_amylovora_OR1	GCA_002732445.1	NZ_JAAEWB010000012.1 Erwinia amylovora strain Ea12 plasmid pEU30, whole genome shotgun sequence
Erwinia_amylovora_OR1	GCA_002732445.1	NZ_JAAEWB010000012.1 Erwinia amylovora strain Ea12 plasmid pEU30, whole genome shotgun sequence
Erwinia_amylovora_OR1	GCA_002732445.1	CU468130.1 Erwinia tasmaniensis strain ET1/99 complete plasmid pET35
Erwinia_amylovora_OR1	GCA_002732445.1	IMGVR_UViG_3300031420_000044
Erwinia_amylovora_OR1	GCA_002732445.1	NZ_CP028352.1 Pantoea vagans strain PV989 plasmid pPV989-94, complete sequence
Erwinia_amylovora_OR1	GCA_002732445.1	NZ_JAAEWB010000012.1 Erwinia amylovora strain Ea12 plasmid pEU30, whole genome shotgun sequence
Erwinia_amylovora_OR1	GCA_002732445.1	NZ_CP030267.1 Klebsiella pneumoniae subsp. pneumoniae strain SC-7 plasmid pSC7-KPC, complete sequence
Erwinia_amylovora_OR1	GCA_002732445.1	IMGVR_UViG_3300031151_000085
Erwinia_amylovora_OR1	GCA_002732445.1	NZ_JAAEWH010000068.1 Erwinia amylovora strain Ea01-03 plasmid pEA4.0, whole genome shotgun sequence
Erwinia_amylovora_OR1	GCA_002732445.1	AJJI01000025.1 Klebsiella pneumoniae subsp. pneumoniae DSM 30104 = JCM 1662 = NBRC 14940 strain DSM 30104 plasmid pKPt3 Contig00025, whole genome shotgun sequence
Erwinia_amylovora_OR1	GCA_002732445.1	NZ_JAAEWB010000012.1 Erwinia amylovora strain Ea12 plasmid pEU30, whole genome shotgun sequence
Erwinia_amylovora_OR1	GCA_002732445.1	NZ_JAAEWB010000012.1 Erwinia amylovora strain Ea12 plasmid pEU30, whole genome shotgun sequence
Erwinia_amylovora_OR1	GCA_002732445.1	NZ_JAAEWB010000012.1 Erwinia amylovora strain Ea12 plasmid pEU30, whole genome shotgun sequence
Erwinia_amylovora_OR1	GCA_002732445.1	NZ_JAAEWH010000049.1 Erwinia amylovora strain Ea01-03 plasmid pEU30, whole genome shotgun sequence
Erwinia_amylovora_OR1	GCA_002732445.1	NZ_JAAEWH010000049.1 Erwinia amylovora strain Ea01-03 plasmid pEU30, whole genome shotgun sequence
Erwinia_amylovora_OR1	GCA_002732445.1	NZ_JAAEWH010000049.1 Erwinia amylovora strain Ea01-03 plasmid pEU30, whole genome shotgun sequence
Erwinia_amylovora_OR1	GCA_002732445.1	NZ_JAAEWB010000012.1 Erwinia amylovora strain Ea12 plasmid pEU30, whole genome shotgun sequence
Erwinia_amylovora_OR1	GCA_002732445.1	NZ_JAAEWB010000012.1 Erwinia amylovora strain Ea12 plasmid pEU30, whole genome shotgun sequence
Erwinia_amylovora_OR1	GCA_002732445.1	NZ_JAAEWB010000012.1 Erwinia amylovora strain Ea12 plasmid pEU30, whole genome shotgun sequence
Erwinia_amylovora_OR1	GCA_002732445.1	NZ_CP030267.1 Klebsiella pneumoniae subsp. pneumoniae strain SC-7 plasmid pSC7-KPC, complete sequence
Erwinia_amylovora_OR1	GCA_002732445.1	IMGVR_UViG_3300030005_000023
Erwinia_amylovora_OR1	GCA_002732445.1	NZ_JAAEWB010000012.1 Erwinia amylovora strain Ea12 plasmid pEU30, whole genome shotgun sequence
Erwinia_amylovora_OR1	GCA_002732445.1	NZ_CP030267.1 Klebsiella pneumoniae subsp. pneumoniae strain SC-7 plasmid pSC7-KPC, complete sequence
Erwinia_amylovora_OR1	GCA_002732445.1	BK049330.1 TPA_asm: Myoviridae sp. isolate ct8vj1, partial genome
Erwinia_amylovora_OR1	GCA_002732445.1	KJ685892.1 Salmonella enterica subsp. enterica serovar Hadar strain 139.67 plasmid KVHS-004 plasmid mediated quinolone resistance protein (qnrD1) and regulator protein (rop) genes, complete cds
Erwinia_amylovora_OR1	GCA_002732445.1	NZ_CP054046.1 Yersinia massiliensis strain 2011N-4075 plasmid unnamed1, complete sequence
Erwinia_amylovora_OR1	GCA_002732445.1	NZ_RRGT01000084.1 Escherichia coli strain FWSEC0128 map unlocalized plasmid unnamed2 FWSEC0128_contig00036, whole genome shotgun sequence
Erwinia_amylovora_OR1	GCA_002732445.1	NZ_JAAEWB010000012.1 Erwinia amylovora strain Ea12 plasmid pEU30, whole genome shotgun sequence
Erwinia_amylovora_OR1	GCA_002732445.1	NC_005814.1 Yersinia pestis biovar Microtus str. 91001 plasmid pCRY, complete sequence
Erwinia_amylovora_OR1	GCA_002732445.1	NZ_JAAEWH010000049.1 Erwinia amylovora strain Ea01-03 plasmid pEU30, whole genome shotgun sequence
Erwinia_amylovora_OR1	GCA_002732445.1	NZ_JAAEWH010000049.1 Erwinia amylovora strain Ea01-03 plasmid pEU30, whole genome shotgun sequence
Erwinia_amylovora_OR1	GCA_002732445.1	NZ_JAAEWB010000012.1 Erwinia amylovora strain Ea12 plasmid pEU30, whole genome shotgun sequence
Erwinia_amylovora_OR1	GCA_002732445.1	CU468130.1 Erwinia tasmaniensis strain ET1/99 complete plasmid pET35
Erwinia_amylovora_OR1	GCA_002732445.1	NZ_JAAEWB010000012.1 Erwinia amylovora strain Ea12 plasmid pEU30, whole genome shotgun sequence
Erwinia_amylovora_OR1	GCA_002732445.1	NZ_JAAEWB010000012.1 Erwinia amylovora strain Ea12 plasmid pEU30, whole genome shotgun sequence
Erwinia_amylovora_OR1	GCA_002732445.1	DTR_651038
Erwinia_amylovora_OR1	GCA_002732445.1	FQ482085.1 Erwinia tasmaniensis phage phiEt88 complete genome
Erwinia_amylovora_OR1	GCA_002732445.1	NZ_CP030267.1 Klebsiella pneumoniae subsp. pneumoniae strain SC-7 plasmid pSC7-KPC, complete sequence
Erwinia_amylovora_OR1	GCA_002732445.1	NZ_JAAEWB010000012.1 Erwinia amylovora strain Ea12 plasmid pEU30, whole genome shotgun sequence
Erwinia_amylovora_OR1	GCA_002732445.1	NZ_JAAEWB010000012.1 Erwinia amylovora strain Ea12 plasmid pEU30, whole genome shotgun sequence
Erwinia_amylovora_OR1	GCA_002732445.1	NZ_CP030267.1 Klebsiella pneumoniae subsp. pneumoniae strain SC-7 plasmid pSC7-KPC, complete sequence
Erwinia_amylovora_OR1	GCA_002732445.1	NZ_JAAEWB010000012.1 Erwinia amylovora strain Ea12 plasmid pEU30, whole genome shotgun sequence
Erwinia_amylovora_OR1	GCA_002732445.1	NZ_JAAEWB010000012.1 Erwinia amylovora strain Ea12 plasmid pEU30, whole genome shotgun sequence
Erwinia_amylovora_OR1	GCA_002732445.1	NZ_JAAEWH010000049.1 Erwinia amylovora strain Ea01-03 plasmid pEU30, whole genome shotgun sequence
Erwinia_amylovora_OR1	GCA_002732445.1	NZ_JAAEWB010000012.1 Erwinia amylovora strain Ea12 plasmid pEU30, whole genome shotgun sequence
Erwinia_amylovora_OR1	GCA_002732445.1	NZ_JAAEWB010000012.1 Erwinia amylovora strain Ea12 plasmid pEU30, whole genome shotgun sequence
Erwinia_amylovora_OR1	GCA_002732445.1	NZ_JAAEWB010000012.1 Erwinia amylovora strain Ea12 plasmid pEU30, whole genome shotgun sequence
Erwinia_amylovora_OR1	GCA_002732445.1	NZ_JAAEWH010000049.1 Erwinia amylovora strain Ea01-03 plasmid pEU30, whole genome shotgun sequence
Erwinia_amylovora_OR1	GCA_002732445.1	NZ_JAAEWH010000049.1 Erwinia amylovora strain Ea01-03 plasmid pEU30, whole genome shotgun sequence
Erwinia_amylovora_OR1	GCA_002732445.1	NZ_JAAEWB010000012.1 Erwinia amylovora strain Ea12 plasmid pEU30, whole genome shotgun sequence
Erwinia_amylovora_OR1	GCA_002732445.1	NZ_JAAEWB010000012.1 Erwinia amylovora strain Ea12 plasmid pEU30, whole genome shotgun sequence
Erwinia_amylovora_OR1	GCA_002732445.1	NZ_JAAEWB010000012.1 Erwinia amylovora strain Ea12 plasmid pEU30, whole genome shotgun sequence
Erwinia_amylovora_MANB02_1	GCA_002732485.1	NZ_JAAEWH010000049.1 Erwinia amylovora strain Ea01-03 plasmid pEU30, whole genome shotgun sequence
Erwinia_amylovora_MANB02_1	GCA_002732485.1	NZ_JAAEWB010000012.1 Erwinia amylovora strain Ea12 plasmid pEU30, whole genome shotgun sequence
Erwinia_amylovora_MANB02_1	GCA_002732485.1	NZ_JAAEWB010000012.1 Erwinia amylovora strain Ea12 plasmid pEU30, whole genome shotgun sequence
Erwinia_amylovora_MANB02_1	GCA_002732485.1	KJ685892.1 Salmonella enterica subsp. enterica serovar Hadar strain 139.67 plasmid KVHS-004 plasmid mediated quinolone resistance protein (qnrD1) and regulator protein (rop) genes, complete cds
Erwinia_amylovora_MANB02_1	GCA_002732485.1	NZ_JAAEWB010000012.1 Erwinia amylovora strain Ea12 plasmid pEU30, whole genome shotgun sequence
Erwinia_amylovora_MANB02_1	GCA_002732485.1	NZ_JAAEWB010000012.1 Erwinia amylovora strain Ea12 plasmid pEU30, whole genome shotgun sequence
Erwinia_amylovora_MANB02_1	GCA_002732485.1	NZ_CP030267.1 Klebsiella pneumoniae subsp. pneumoniae strain SC-7 plasmid pSC7-KPC, complete sequence
Erwinia_amylovora_MANB02_1	GCA_002732485.1	NZ_JAAEWB010000012.1 Erwinia amylovora strain Ea12 plasmid pEU30, whole genome shotgun sequence
Erwinia_amylovora_MANB02_1	GCA_002732485.1	NZ_JAAEWH010000049.1 Erwinia amylovora strain Ea01-03 plasmid pEU30, whole genome shotgun sequence
Erwinia_amylovora_MANB02_1	GCA_002732485.1	NZ_JAAEWH010000049.1 Erwinia amylovora strain Ea01-03 plasmid pEU30, whole genome shotgun sequence
Erwinia_amylovora_MANB02_1	GCA_002732485.1	NZ_JAAEWH010000049.1 Erwinia amylovora strain Ea01-03 plasmid pEU30, whole genome shotgun sequence
Erwinia_amylovora_MANB02_1	GCA_002732485.1	NZ_JAAEWB010000012.1 Erwinia amylovora strain Ea12 plasmid pEU30, whole genome shotgun sequence
Erwinia_amylovora_MANB02_1	GCA_002732485.1	NZ_JAAEWH010000049.1 Erwinia amylovora strain Ea01-03 plasmid pEU30, whole genome shotgun sequence
Erwinia_amylovora_MANB02_1	GCA_002732485.1	NZ_JAAEWB010000012.1 Erwinia amylovora strain Ea12 plasmid pEU30, whole genome shotgun sequence
Erwinia_amylovora_MANB02_1	GCA_002732485.1	NZ_CP028352.1 Pantoea vagans strain PV989 plasmid pPV989-94, complete sequence
Erwinia_amylovora_MANB02_1	GCA_002732485.1	NC_005814.1 Yersinia pestis biovar Microtus str. 91001 plasmid pCRY, complete sequence
Erwinia_amylovora_MANB02_1	GCA_002732485.1	AJJI01000025.1 Klebsiella pneumoniae subsp. pneumoniae DSM 30104 = JCM 1662 = NBRC 14940 strain DSM 30104 plasmid pKPt3 Contig00025, whole genome shotgun sequence
Erwinia_amylovora_MANB02_1	GCA_002732485.1	NZ_JAAEWB010000012.1 Erwinia amylovora strain Ea12 plasmid pEU30, whole genome shotgun sequence
Erwinia_amylovora_MANB02_1	GCA_002732485.1	NZ_JAAEWB010000012.1 Erwinia amylovora strain Ea12 plasmid pEU30, whole genome shotgun sequence
Erwinia_amylovora_MANB02_1	GCA_002732485.1	NZ_JAAEWH010000049.1 Erwinia amylovora strain Ea01-03 plasmid pEU30, whole genome shotgun sequence
Erwinia_amylovora_MANB02_1	GCA_002732485.1	NZ_CP030267.1 Klebsiella pneumoniae subsp. pneumoniae strain SC-7 plasmid pSC7-KPC, complete sequence
Erwinia_amylovora_MANB02_1	GCA_002732485.1	FQ482085.1 Erwinia tasmaniensis phage phiEt88 complete genome
Erwinia_amylovora_MANB02_1	GCA_002732485.1	NZ_JAAEWB010000012.1 Erwinia amylovora strain Ea12 plasmid pEU30, whole genome shotgun sequence
Erwinia_amylovora_MANB02_1	GCA_002732485.1	NZ_CP030267.1 Klebsiella pneumoniae subsp. pneumoniae strain SC-7 plasmid pSC7-KPC, complete sequence
Erwinia_amylovora_MANB02_1	GCA_002732485.1	NZ_JAAEWB010000012.1 Erwinia amylovora strain Ea12 plasmid pEU30, whole genome shotgun sequence
Erwinia_amylovora_MANB02_1	GCA_002732485.1	CU468130.1 Erwinia tasmaniensis strain ET1/99 complete plasmid pET35
Erwinia_amylovora_MANB02_1	GCA_002732485.1	NZ_RRGT01000084.1 Escherichia coli strain FWSEC0128 map unlocalized plasmid unnamed2 FWSEC0128_contig00036, whole genome shotgun sequence
Erwinia_amylovora_MANB02_1	GCA_002732485.1	NZ_JAAEWB010000012.1 Erwinia amylovora strain Ea12 plasmid pEU30, whole genome shotgun sequence
Erwinia_amylovora_MANB02_1	GCA_002732485.1	NZ_JAAEWB010000012.1 Erwinia amylovora strain Ea12 plasmid pEU30, whole genome shotgun sequence
Erwinia_amylovora_MANB02_1	GCA_002732485.1	NZ_JAAEWB010000012.1 Erwinia amylovora strain Ea12 plasmid pEU30, whole genome shotgun sequence
Erwinia_amylovora_MANB02_1	GCA_002732485.1	NZ_JAAEWB010000012.1 Erwinia amylovora strain Ea12 plasmid pEU30, whole genome shotgun sequence
Erwinia_amylovora_MANB02_1	GCA_002732485.1	NZ_CP030267.1 Klebsiella pneumoniae subsp. pneumoniae strain SC-7 plasmid pSC7-KPC, complete sequence
Erwinia_amylovora_MANB02_1	GCA_002732485.1	NZ_JAAEWH010000049.1 Erwinia amylovora strain Ea01-03 plasmid pEU30, whole genome shotgun sequence
Erwinia_amylovora_MANB02_1	GCA_002732485.1	IMGVR_UViG_3300031151_000085
Erwinia_amylovora_MANB02_1	GCA_002732485.1	NZ_JAAEWH010000049.1 Erwinia amylovora strain Ea01-03 plasmid pEU30, whole genome shotgun sequence
Erwinia_amylovora_MANB02_1	GCA_002732485.1	NZ_JAAEWB010000012.1 Erwinia amylovora strain Ea12 plasmid pEU30, whole genome shotgun sequence
Erwinia_amylovora_MANB02_1	GCA_002732485.1	NZ_JAAEWB010000012.1 Erwinia amylovora strain Ea12 plasmid pEU30, whole genome shotgun sequence
Erwinia_amylovora_MANB02_1	GCA_002732485.1	DTR_651038
Erwinia_amylovora_MANB02_1	GCA_002732485.1	NZ_JAAEWB010000012.1 Erwinia amylovora strain Ea12 plasmid pEU30, whole genome shotgun sequence
Erwinia_amylovora_MANB02_1	GCA_002732485.1	NZ_JAAEWB010000012.1 Erwinia amylovora strain Ea12 plasmid pEU30, whole genome shotgun sequence
Erwinia_amylovora_MANB02_1	GCA_002732485.1	NZ_JAAEWR010000012.1 Erwinia amylovora strain 39-I-II plasmid pEA72, whole genome shotgun sequence
Erwinia_amylovora_MANB02_1	GCA_002732485.1	NZ_JAAEWB010000012.1 Erwinia amylovora strain Ea12 plasmid pEU30, whole genome shotgun sequence
Erwinia_amylovora_MANB02_1	GCA_002732485.1	CU468130.1 Erwinia tasmaniensis strain ET1/99 complete plasmid pET35
Erwinia_amylovora_MANB02_1	GCA_002732485.1	NZ_JAAEWH010000049.1 Erwinia amylovora strain Ea01-03 plasmid pEU30, whole genome shotgun sequence
Erwinia_amylovora_MANB02_1	GCA_002732485.1	NZ_CP054046.1 Yersinia massiliensis strain 2011N-4075 plasmid unnamed1, complete sequence
Erwinia_amylovora_MANB02_1	GCA_002732485.1	NZ_JAAEWH010000049.1 Erwinia amylovora strain Ea01-03 plasmid pEU30, whole genome shotgun sequence
Erwinia_amylovora_MANB02_1	GCA_002732485.1	NZ_JAAEWB010000012.1 Erwinia amylovora strain Ea12 plasmid pEU30, whole genome shotgun sequence
Erwinia_amylovora_MANB02_1	GCA_002732485.1	NZ_JAAEWB010000012.1 Erwinia amylovora strain Ea12 plasmid pEU30, whole genome shotgun sequence
Erwinia_amylovora_MANB02_1	GCA_002732485.1	NZ_JAAEWB010000012.1 Erwinia amylovora strain Ea12 plasmid pEU30, whole genome shotgun sequence
Erwinia_amylovora_MANB02_1	GCA_002732485.1	NZ_CP030267.1 Klebsiella pneumoniae subsp. pneumoniae strain SC-7 plasmid pSC7-KPC, complete sequence
Erwinia_amylovora_MANB02_1	GCA_002732485.1	NZ_JAAEWB010000012.1 Erwinia amylovora strain Ea12 plasmid pEU30, whole genome shotgun sequence
Erwinia_amylovora_MANB02_1	GCA_002732485.1	NZ_JAAEWH010000049.1 Erwinia amylovora strain Ea01-03 plasmid pEU30, whole genome shotgun sequence
Erwinia_amylovora_MANB02_1	GCA_002732485.1	NZ_JAAEWH010000049.1 Erwinia amylovora strain Ea01-03 plasmid pEU30, whole genome shotgun sequence
Erwinia_amylovora_MANB02_1	GCA_002732485.1	BK049330.1 TPA_asm: Myoviridae sp. isolate ct8vj1, partial genome
Erwinia_amylovora_MANB02_1	GCA_002732485.1	NZ_JAAEWB010000012.1 Erwinia amylovora strain Ea12 plasmid pEU30, whole genome shotgun sequence
Erwinia_amylovora_MANB02_1	GCA_002732485.1	NZ_JAAEWB010000012.1 Erwinia amylovora strain Ea12 plasmid pEU30, whole genome shotgun sequence
Erwinia_amylovora_MANB02_1	GCA_002732485.1	NZ_JAAEWB010000012.1 Erwinia amylovora strain Ea12 plasmid pEU30, whole genome shotgun sequence
Erwinia_amylovora_EA110	GCA_002732505.1	KJ685892.1 Salmonella enterica subsp. enterica serovar Hadar strain 139.67 plasmid KVHS-004 plasmid mediated quinolone resistance protein (qnrD1) and regulator protein (rop) genes, complete cds
Erwinia_amylovora_EA110	GCA_002732505.1	NZ_JAAEWH010000068.1 Erwinia amylovora strain Ea01-03 plasmid pEA4.0, whole genome shotgun sequence
Erwinia_amylovora_EA110	GCA_002732505.1	NZ_CP030267.1 Klebsiella pneumoniae subsp. pneumoniae strain SC-7 plasmid pSC7-KPC, complete sequence
Erwinia_amylovora_EA110	GCA_002732505.1	NZ_CP030267.1 Klebsiella pneumoniae subsp. pneumoniae strain SC-7 plasmid pSC7-KPC, complete sequence
Erwinia_amylovora_EA110	GCA_002732505.1	NC_011148.1 Salmonella enterica subsp. enterica serovar Agona str. SL483 plasmid unnamed, complete sequence
Erwinia_amylovora_EA110	GCA_002732505.1	CU468130.1 Erwinia tasmaniensis strain ET1/99 complete plasmid pET35
Erwinia_amylovora_EA110	GCA_002732505.1	FQ482085.1 Erwinia tasmaniensis phage phiEt88 complete genome
Erwinia_amylovora_EA110	GCA_002732505.1	NZ_JAAEWR010000012.1 Erwinia amylovora strain 39-I-II plasmid pEA72, whole genome shotgun sequence
Erwinia_amylovora_EA110	GCA_002732505.1	NZ_CP030267.1 Klebsiella pneumoniae subsp. pneumoniae strain SC-7 plasmid pSC7-KPC, complete sequence
Erwinia_amylovora_EA110	GCA_002732505.1	NZ_JAAEWB010000012.1 Erwinia amylovora strain Ea12 plasmid pEU30, whole genome shotgun sequence
Erwinia_amylovora_EA110	GCA_002732505.1	CU468130.1 Erwinia tasmaniensis strain ET1/99 complete plasmid pET35
Erwinia_amylovora_EA110	GCA_002732505.1	NZ_JAAEWH010000049.1 Erwinia amylovora strain Ea01-03 plasmid pEU30, whole genome shotgun sequence
Erwinia_sp_OLCASP19	GCA_002751995.1	MH681289.1 Klebsiella pneumoniae strain 13624 plasmid pSIM-1-BJ01, complete sequence
Erwinia_sp_OLCASP19	GCA_002751995.1	IMGVR_UViG_3300030498_000017
Erwinia_sp_OLCASP19	GCA_002751995.1	NC_011148.1 Salmonella enterica subsp. enterica serovar Agona str. SL483 plasmid unnamed, complete sequence
Erwinia_sp_OLCASP19	GCA_002751995.1	Gammaproteobacteria_gi_483979653
Erwinia_sp_OLCASP19	GCA_002751995.1	IMGVR_UViG_3300030498_000017
Erwinia_sp_OLCASP19	GCA_002751995.1	CP018920.1 Serratia marcescens strain UMH7 plasmid unnamed3, complete sequence
Erwinia_sp_OLCASP19	GCA_002751995.1	IMGVR_UViG_3300030498_000003
Erwinia_sp_OLCASP19	GCA_002751995.1	IMGVR_UViG_2695420846_000001
Erwinia_sp_OLCASP19	GCA_002751995.1	IMGVR_UViG_3300030498_000017
Erwinia_sp_OLCASP19	GCA_002751995.1	NC_011148.1 Salmonella enterica subsp. enterica serovar Agona str. SL483 plasmid unnamed, complete sequence
Erwinia_sp_OLMTSP26	GCA_002752015.1	MH681289.1 Klebsiella pneumoniae strain 13624 plasmid pSIM-1-BJ01, complete sequence
Erwinia_sp_OLMTSP26	GCA_002752015.1	IMGVR_UViG_2695420846_000001
Erwinia_sp_OLMTSP26	GCA_002752015.1	IMGVR_UViG_3300030498_000017
Erwinia_sp_OLMTSP26	GCA_002752015.1	Gammaproteobacteria_gi_483979653
Erwinia_sp_OLMTSP26	GCA_002752015.1	IMGVR_UViG_3300030498_000017
Erwinia_sp_OLMTSP26	GCA_002752015.1	CP018920.1 Serratia marcescens strain UMH7 plasmid unnamed3, complete sequence
Erwinia_sp_OLMTSP26	GCA_002752015.1	NC_011148.1 Salmonella enterica subsp. enterica serovar Agona str. SL483 plasmid unnamed, complete sequence
Erwinia_sp_OLMTSP26	GCA_002752015.1	IMGVR_UViG_3300030498_000003
Erwinia_sp_OLMTSP26	GCA_002752015.1	NC_011148.1 Salmonella enterica subsp. enterica serovar Agona str. SL483 plasmid unnamed, complete sequence
Erwinia_sp_OLMTSP26	GCA_002752015.1	CP018916.1 Serratia marcescens strain UMH1 plasmid unnamed1, complete sequence
Erwinia_sp_OLMTSP26	GCA_002752015.1	IMGVR_UViG_3300030498_000017
Erwinia_sp_OLMDSP33	GCA_002752025.1	IMGVR_UViG_2695420846_000001
Erwinia_sp_OLMDSP33	GCA_002752025.1	IMGVR_UViG_3300030498_000017
Erwinia_sp_OLMDSP33	GCA_002752025.1	NC_011148.1 Salmonella enterica subsp. enterica serovar Agona str. SL483 plasmid unnamed, complete sequence
Erwinia_sp_OLMDSP33	GCA_002752025.1	CP018920.1 Serratia marcescens strain UMH7 plasmid unnamed3, complete sequence
Erwinia_sp_OLMDSP33	GCA_002752025.1	IMGVR_UViG_3300030498_000003
Erwinia_sp_OLMDSP33	GCA_002752025.1	NC_011148.1 Salmonella enterica subsp. enterica serovar Agona str. SL483 plasmid unnamed, complete sequence
Erwinia_sp_OLMDSP33	GCA_002752025.1	IMGVR_UViG_3300030498_000017
Erwinia_sp_OLMDSP33	GCA_002752025.1	IMGVR_UViG_3300030498_000017
Erwinia_sp_OLMDSP33	GCA_002752025.1	MH681289.1 Klebsiella pneumoniae strain 13624 plasmid pSIM-1-BJ01, complete sequence
Erwinia_sp_OLMDSP33	GCA_002752025.1	Gammaproteobacteria_gi_483979653
Erwinia_sp_OLSSP12	GCA_002752055.1	CP018916.1 Serratia marcescens strain UMH1 plasmid unnamed1, complete sequence
Erwinia_sp_OLSSP12	GCA_002752055.1	IMGVR_UViG_3300030498_000017
Erwinia_sp_OLSSP12	GCA_002752055.1	IMGVR_UViG_3300030498_000017
Erwinia_sp_OLSSP12	GCA_002752055.1	IMGVR_UViG_2695420846_000001
Erwinia_sp_OLSSP12	GCA_002752055.1	IMGVR_UViG_3300030498_000003
Erwinia_sp_OLSSP12	GCA_002752055.1	NC_011148.1 Salmonella enterica subsp. enterica serovar Agona str. SL483 plasmid unnamed, complete sequence
Erwinia_sp_OLSSP12	GCA_002752055.1	NC_011148.1 Salmonella enterica subsp. enterica serovar Agona str. SL483 plasmid unnamed, complete sequence
Erwinia_sp_OLSSP12	GCA_002752055.1	CP018920.1 Serratia marcescens strain UMH7 plasmid unnamed3, complete sequence
Erwinia_sp_OLSSP12	GCA_002752055.1	Gammaproteobacteria_gi_483979653
Erwinia_sp_OLSSP12	GCA_002752055.1	IMGVR_UViG_3300030498_000017
Erwinia_sp_OLSSP12	GCA_002752055.1	MH681289.1 Klebsiella pneumoniae strain 13624 plasmid pSIM-1-BJ01, complete sequence
Erwinia_sp_OLTSP20	GCA_002752075.1	NC_011148.1 Salmonella enterica subsp. enterica serovar Agona str. SL483 plasmid unnamed, complete sequence
Erwinia_sp_OLTSP20	GCA_002752075.1	Gammaproteobacteria_gi_483979653
Erwinia_sp_OLTSP20	GCA_002752075.1	IMGVR_UViG_2695420846_000001
Erwinia_sp_OLTSP20	GCA_002752075.1	CP018920.1 Serratia marcescens strain UMH7 plasmid unnamed3, complete sequence
Erwinia_sp_OLTSP20	GCA_002752075.1	MH681289.1 Klebsiella pneumoniae strain 13624 plasmid pSIM-1-BJ01, complete sequence
Erwinia_sp_OLTSP20	GCA_002752075.1	CP018916.1 Serratia marcescens strain UMH1 plasmid unnamed1, complete sequence
Erwinia_sp_OLTSP20	GCA_002752075.1	IMGVR_UViG_3300030498_000017
Erwinia_sp_OLTSP20	GCA_002752075.1	NC_011148.1 Salmonella enterica subsp. enterica serovar Agona str. SL483 plasmid unnamed, complete sequence
Erwinia_sp_OLTSP20	GCA_002752075.1	IMGVR_UViG_3300030498_000003
Erwinia_sp_OLTSP20	GCA_002752075.1	IMGVR_UViG_3300030498_000017
Erwinia_sp_OLTSP20	GCA_002752075.1	IMGVR_UViG_3300030498_000017
Erwinia_sp_OLFS4	GCA_002752165.1	IMGVR_UViG_2695420846_000001
Erwinia_sp_OLFS4	GCA_002752165.1	NC_011148.1 Salmonella enterica subsp. enterica serovar Agona str. SL483 plasmid unnamed, complete sequence
Erwinia_sp_OLFS4	GCA_002752165.1	IMGVR_UViG_3300030498_000017
Erwinia_sp_OLFS4	GCA_002752165.1	IMGVR_UViG_3300030498_000017
Erwinia_sp_OLFS4	GCA_002752165.1	CP018916.1 Serratia marcescens strain UMH1 plasmid unnamed1, complete sequence
Erwinia_sp_OLFS4	GCA_002752165.1	NC_011148.1 Salmonella enterica subsp. enterica serovar Agona str. SL483 plasmid unnamed, complete sequence
Erwinia_sp_OLFS4	GCA_002752165.1	IMGVR_UViG_3300030498_000017
Erwinia_sp_OLFS4	GCA_002752165.1	MH681289.1 Klebsiella pneumoniae strain 13624 plasmid pSIM-1-BJ01, complete sequence
Erwinia_sp_OLFS4	GCA_002752165.1	CP018920.1 Serratia marcescens strain UMH7 plasmid unnamed3, complete sequence
Erwinia_sp_OLFS4	GCA_002752165.1	IMGVR_UViG_3300030498_000003
Erwinia_sp_OLFS4	GCA_002752165.1	Gammaproteobacteria_gi_483979653
Erwinia_sp_OAMSP11	GCA_002752595.1	NC_011148.1 Salmonella enterica subsp. enterica serovar Agona str. SL483 plasmid unnamed, complete sequence
Erwinia_sp_OAMSP11	GCA_002752595.1	CP018920.1 Serratia marcescens strain UMH7 plasmid unnamed3, complete sequence
Erwinia_sp_OAMSP11	GCA_002752595.1	NC_011148.1 Salmonella enterica subsp. enterica serovar Agona str. SL483 plasmid unnamed, complete sequence
Erwinia_sp_OAMSP11	GCA_002752595.1	IMGVR_UViG_3300030498_000017
Erwinia_sp_OAMSP11	GCA_002752595.1	Gammaproteobacteria_gi_483979653
Erwinia_sp_OAMSP11	GCA_002752595.1	IMGVR_UViG_3300030498_000003
Erwinia_sp_OAMSP11	GCA_002752595.1	IMGVR_UViG_3300030498_000017
Erwinia_sp_OAMSP11	GCA_002752595.1	MH681289.1 Klebsiella pneumoniae strain 13624 plasmid pSIM-1-BJ01, complete sequence
Erwinia_sp_OAMSP11	GCA_002752595.1	IMGVR_UViG_2695420846_000001
Erwinia_sp_OAMSP11	GCA_002752595.1	IMGVR_UViG_3300030498_000017
Erwinia_sp_OAMSP11	GCA_002752595.1	CP018916.1 Serratia marcescens strain UMH1 plasmid unnamed1, complete sequence
Erwinia_amylovora_E_2	GCA_002803865.1	NZ_CP030267.1 Klebsiella pneumoniae subsp. pneumoniae strain SC-7 plasmid pSC7-KPC, complete sequence
Erwinia_amylovora_E_2	GCA_002803865.1	NZ_JAAEWR010000012.1 Erwinia amylovora strain 39-I-II plasmid pEA72, whole genome shotgun sequence
Erwinia_amylovora_E_2	GCA_002803865.1	NC_011148.1 Salmonella enterica subsp. enterica serovar Agona str. SL483 plasmid unnamed, complete sequence
Erwinia_amylovora_E_2	GCA_002803865.1	FQ482085.1 Erwinia tasmaniensis phage phiEt88 complete genome
Erwinia_amylovora_E_2	GCA_002803865.1	CU468130.1 Erwinia tasmaniensis strain ET1/99 complete plasmid pET35
Erwinia_amylovora_E_2	GCA_002803865.1	NZ_CP030267.1 Klebsiella pneumoniae subsp. pneumoniae strain SC-7 plasmid pSC7-KPC, complete sequence
Erwinia_amylovora_E_2	GCA_002803865.1	NZ_CP028352.1 Pantoea vagans strain PV989 plasmid pPV989-94, complete sequence
Erwinia_amylovora_E_2	GCA_002803865.1	IMGVR_UViG_3300031420_000044
Erwinia_amylovora_E_2	GCA_002803865.1	BK049330.1 TPA_asm: Myoviridae sp. isolate ct8vj1, partial genome
Erwinia_amylovora_E_2	GCA_002803865.1	KJ685892.1 Salmonella enterica subsp. enterica serovar Hadar strain 139.67 plasmid KVHS-004 plasmid mediated quinolone resistance protein (qnrD1) and regulator protein (rop) genes, complete cds
Erwinia_amylovora_E_2	GCA_002803865.1	NC_005814.1 Yersinia pestis biovar Microtus str. 91001 plasmid pCRY, complete sequence
Erwinia_amylovora_E_2	GCA_002803865.1	NZ_JAAEWB010000012.1 Erwinia amylovora strain Ea12 plasmid pEU30, whole genome shotgun sequence
Erwinia_amylovora_E_2	GCA_002803865.1	CU468130.1 Erwinia tasmaniensis strain ET1/99 complete plasmid pET35
Erwinia_amylovora_E_2	GCA_002803865.1	NZ_JAAEWH010000068.1 Erwinia amylovora strain Ea01-03 plasmid pEA4.0, whole genome shotgun sequence
Erwinia_amylovora_E_2	GCA_002803865.1	NZ_JAAEWH010000049.1 Erwinia amylovora strain Ea01-03 plasmid pEU30, whole genome shotgun sequence
Erwinia_amylovora_E_2	GCA_002803865.1	CU468130.1 Erwinia tasmaniensis strain ET1/99 complete plasmid pET35
Erwinia_amylovora_E_2	GCA_002803865.1	NZ_CP030267.1 Klebsiella pneumoniae subsp. pneumoniae strain SC-7 plasmid pSC7-KPC, complete sequence
Erwinia_pyrifoliae_EpK1_15	GCA_002952315.1	CP017585.1 Pantoea stewartii subsp. stewartii DC283 plasmid pDSJ04, complete sequence
Erwinia_pyrifoliae_EpK1_15	GCA_002952315.1	CM016898.1 Klebsiella pneumoniae subsp. pneumoniae strain KPCTRSRTH06 plasmid unnamed2, complete sequence, whole genome shotgun sequence
Erwinia_pyrifoliae_EpK1_15	GCA_002952315.1	CP013915.1 Serratia fonticola strain GS2 plasmid pSF002, complete sequence
Erwinia_pyrifoliae_EpK1_15	GCA_002952315.1	FQ482085.1 Erwinia tasmaniensis phage phiEt88 complete genome
Erwinia_pyrifoliae_EpK1_15	GCA_002952315.1	CP052480.1 Klebsiella pneumoniae strain C16KP0050 plasmid pC16KP0050-4, complete sequence
Erwinia_pyrifoliae_EpK1_15	GCA_002952315.1	FQ482085.1 Erwinia tasmaniensis phage phiEt88 complete genome
Erwinia_pyrifoliae_EpK1_15	GCA_002952315.1	NZ_PEHF01000101.1 Candidatus Symbiopectobacterium sp. 'North America' plasmid unnamed1, whole genome shotgun sequence
Erwinia_amylovora_Ea321	GCA_003992295.1	NZ_JAAEWR010000012.1 Erwinia amylovora strain 39-I-II plasmid pEA72, whole genome shotgun sequence
Erwinia_amylovora_Ea321	GCA_003992295.1	NZ_CP030267.1 Klebsiella pneumoniae subsp. pneumoniae strain SC-7 plasmid pSC7-KPC, complete sequence
Erwinia_amylovora_Ea321	GCA_003992295.1	NC_005814.1 Yersinia pestis biovar Microtus str. 91001 plasmid pCRY, complete sequence
Erwinia_amylovora_Ea321	GCA_003992295.1	CU468130.1 Erwinia tasmaniensis strain ET1/99 complete plasmid pET35
Erwinia_amylovora_Ea321	GCA_003992295.1	CU468130.1 Erwinia tasmaniensis strain ET1/99 complete plasmid pET35
Erwinia_amylovora_Ea321	GCA_003992295.1	NZ_JAAEWH010000068.1 Erwinia amylovora strain Ea01-03 plasmid pEA4.0, whole genome shotgun sequence
Erwinia_amylovora_Ea321	GCA_003992295.1	BK049330.1 TPA_asm: Myoviridae sp. isolate ct8vj1, partial genome
Erwinia_amylovora_Ea321	GCA_003992295.1	NZ_JAAEWB010000012.1 Erwinia amylovora strain Ea12 plasmid pEU30, whole genome shotgun sequence
Erwinia_amylovora_Ea321	GCA_003992295.1	CU468130.1 Erwinia tasmaniensis strain ET1/99 complete plasmid pET35
Erwinia_amylovora_Ea321	GCA_003992295.1	KJ685892.1 Salmonella enterica subsp. enterica serovar Hadar strain 139.67 plasmid KVHS-004 plasmid mediated quinolone resistance protein (qnrD1) and regulator protein (rop) genes, complete cds
Erwinia_amylovora_Ea321	GCA_003992295.1	NZ_CP030267.1 Klebsiella pneumoniae subsp. pneumoniae strain SC-7 plasmid pSC7-KPC, complete sequence
Erwinia_amylovora_Ea321	GCA_003992295.1	NZ_CP028352.1 Pantoea vagans strain PV989 plasmid pPV989-94, complete sequence
Erwinia_amylovora_Ea321	GCA_003992295.1	NZ_JAAEWH010000049.1 Erwinia amylovora strain Ea01-03 plasmid pEU30, whole genome shotgun sequence
Erwinia_amylovora_Ea321	GCA_003992295.1	NZ_CP030267.1 Klebsiella pneumoniae subsp. pneumoniae strain SC-7 plasmid pSC7-KPC, complete sequence
Erwinia_amylovora_Ea321	GCA_003992295.1	IMGVR_UViG_3300031420_000044
Erwinia_amylovora_Ea321	GCA_003992295.1	FQ482085.1 Erwinia tasmaniensis phage phiEt88 complete genome
Erwinia_amylovora_Ea321	GCA_003992295.1	NC_011148.1 Salmonella enterica subsp. enterica serovar Agona str. SL483 plasmid unnamed, complete sequence
Erwinia_amylovora_HKN06P1	GCA_004023365.1	NC_011148.1 Salmonella enterica subsp. enterica serovar Agona str. SL483 plasmid unnamed, complete sequence
Erwinia_amylovora_HKN06P1	GCA_004023365.1	CU468130.1 Erwinia tasmaniensis strain ET1/99 complete plasmid pET35
Erwinia_amylovora_HKN06P1	GCA_004023365.1	NZ_CP030267.1 Klebsiella pneumoniae subsp. pneumoniae strain SC-7 plasmid pSC7-KPC, complete sequence
Erwinia_amylovora_HKN06P1	GCA_004023365.1	NZ_CP030267.1 Klebsiella pneumoniae subsp. pneumoniae strain SC-7 plasmid pSC7-KPC, complete sequence
Erwinia_amylovora_HKN06P1	GCA_004023365.1	NZ_JAAEWR010000012.1 Erwinia amylovora strain 39-I-II plasmid pEA72, whole genome shotgun sequence
Erwinia_amylovora_HKN06P1	GCA_004023365.1	NZ_CP030267.1 Klebsiella pneumoniae subsp. pneumoniae strain SC-7 plasmid pSC7-KPC, complete sequence
Erwinia_amylovora_HKN06P1	GCA_004023365.1	NZ_JAAEWH010000068.1 Erwinia amylovora strain Ea01-03 plasmid pEA4.0, whole genome shotgun sequence
Erwinia_amylovora_HKN06P1	GCA_004023365.1	IMGVR_UViG_3300031420_000044
Erwinia_amylovora_HKN06P1	GCA_004023365.1	FQ482085.1 Erwinia tasmaniensis phage phiEt88 complete genome
Erwinia_amylovora_HKN06P1	GCA_004023365.1	KJ685892.1 Salmonella enterica subsp. enterica serovar Hadar strain 139.67 plasmid KVHS-004 plasmid mediated quinolone resistance protein (qnrD1) and regulator protein (rop) genes, complete cds
Erwinia_amylovora_HKN06P1	GCA_004023365.1	CU468130.1 Erwinia tasmaniensis strain ET1/99 complete plasmid pET35
Erwinia_amylovora_HKN06P1	GCA_004023365.1	CU468130.1 Erwinia tasmaniensis strain ET1/99 complete plasmid pET35
Erwinia_amylovora_HKN06P1	GCA_004023365.1	NZ_JAAEWB010000012.1 Erwinia amylovora strain Ea12 plasmid pEU30, whole genome shotgun sequence
Erwinia_amylovora_HKN06P1	GCA_004023365.1	NZ_JAAEWH010000049.1 Erwinia amylovora strain Ea01-03 plasmid pEU30, whole genome shotgun sequence
Erwinia_persicina_CFBP1351100_0	GCA_005233475.1	NZ_CP022726.1 Erwinia persicina strain B64 plasmid pEP1, complete sequence
Erwinia_persicina_CFBP1351100_0	GCA_005233475.1	IMGVR_UViG_3300013494_000003
Erwinia_endophytica_A41C3	GCA_009295515.1	CP045722.1 Pantoea eucalypti strain LMG 24197 plasmid pEuc2, complete sequence
Erwinia_sp_J316	GCA_009707715.1	IMGVR_UViG_3300031112_000082
Erwinia_sp_J316	GCA_009707715.1	NZ_JAAEWR010000012.1 Erwinia amylovora strain 39-I-II plasmid pEA72, whole genome shotgun sequence
Erwinia_sp_J316	GCA_009707715.1	IMGVR_UViG_3300029490_000013
Erwinia_sp_J316	GCA_009707715.1	BK047668.1 TPA_asm: Myoviridae sp. isolate ctDfJ4, partial genome
Erwinia_sp_J316	GCA_009707715.1	IMGVR_UViG_3300031087_000141
Erwinia_sp_J780	GCA_009738185.1	IMGVR_UViG_3300031282_000001
Erwinia_sp_J780	GCA_009738185.1	MT836693.1 UNVERIFIED: Bacteriophage sp. clone scaffold_2848 genomic sequence
Erwinia_sp_J780	GCA_009738185.1	BK032169.1 TPA_asm: Myoviridae sp. isolate ctmWH10, partial genome
Erwinia_sp_J780	GCA_009738185.1	IMGVR_UViG_3300031372_000080
Erwinia_sp_J780	GCA_009738185.1	BK020196.1 TPA_asm: Myoviridae sp. isolate ctXvE9, partial genome
Erwinia_sp_J780	GCA_009738185.1	IMGVR_UViG_3300009036_000110
Erwinia_sp_J780	GCA_009738185.1	CP055584.1 Citrobacter freundii strain RHBSTW-00110 plasmid pRHBSTW-00110_3, complete sequence
Erwinia_amylovora_P_C_3b	GCA_012366965.1	NZ_CP030267.1 Klebsiella pneumoniae subsp. pneumoniae strain SC-7 plasmid pSC7-KPC, complete sequence
Erwinia_amylovora_P_C_3b	GCA_012366965.1	FQ482085.1 Erwinia tasmaniensis phage phiEt88 complete genome
Erwinia_amylovora_P_C_3b	GCA_012366965.1	NZ_CP030267.1 Klebsiella pneumoniae subsp. pneumoniae strain SC-7 plasmid pSC7-KPC, complete sequence
Erwinia_amylovora_P_C_3b	GCA_012366965.1	CU468130.1 Erwinia tasmaniensis strain ET1/99 complete plasmid pET35
Erwinia_amylovora_P_C_3b	GCA_012366965.1	IMGVR_UViG_3300031420_000044
Erwinia_amylovora_P_C_3b	GCA_012366965.1	NZ_CP030267.1 Klebsiella pneumoniae subsp. pneumoniae strain SC-7 plasmid pSC7-KPC, complete sequence
Erwinia_amylovora_P_C_3b	GCA_012366965.1	CU468130.1 Erwinia tasmaniensis strain ET1/99 complete plasmid pET35
Erwinia_amylovora_P_C_3b	GCA_012366965.1	NZ_JAAEWH010000049.1 Erwinia amylovora strain Ea01-03 plasmid pEU30, whole genome shotgun sequence
Erwinia_amylovora_P_C_3b	GCA_012366965.1	NZ_JAAEWB010000012.1 Erwinia amylovora strain Ea12 plasmid pEU30, whole genome shotgun sequence
Erwinia_amylovora_P_C_3b	GCA_012366965.1	NC_011148.1 Salmonella enterica subsp. enterica serovar Agona str. SL483 plasmid unnamed, complete sequence
Erwinia_amylovora_P_C_3b	GCA_012366965.1	NZ_JAAEWH010000068.1 Erwinia amylovora strain Ea01-03 plasmid pEA4.0, whole genome shotgun sequence
Erwinia_amylovora_P_C_3b	GCA_012366965.1	KJ685892.1 Salmonella enterica subsp. enterica serovar Hadar strain 139.67 plasmid KVHS-004 plasmid mediated quinolone resistance protein (qnrD1) and regulator protein (rop) genes, complete cds
Erwinia_amylovora_P_C_3b	GCA_012366965.1	CU468130.1 Erwinia tasmaniensis strain ET1/99 complete plasmid pET35
Erwinia_amylovora_P_C_3b	GCA_012366965.1	NZ_JAAEWR010000012.1 Erwinia amylovora strain 39-I-II plasmid pEA72, whole genome shotgun sequence
Erwinia_amylovora_IVIA2303	GCA_012366985.1	NZ_JAAEWB010000012.1 Erwinia amylovora strain Ea12 plasmid pEU30, whole genome shotgun sequence
Erwinia_amylovora_IVIA2303	GCA_012366985.1	NZ_CP030267.1 Klebsiella pneumoniae subsp. pneumoniae strain SC-7 plasmid pSC7-KPC, complete sequence
Erwinia_amylovora_IVIA2303	GCA_012366985.1	CU468130.1 Erwinia tasmaniensis strain ET1/99 complete plasmid pET35
Erwinia_amylovora_IVIA2303	GCA_012366985.1	NZ_CP030267.1 Klebsiella pneumoniae subsp. pneumoniae strain SC-7 plasmid pSC7-KPC, complete sequence
Erwinia_amylovora_IVIA2303	GCA_012366985.1	FQ482085.1 Erwinia tasmaniensis phage phiEt88 complete genome
Erwinia_amylovora_IVIA2303	GCA_012366985.1	NZ_JAAEWH010000049.1 Erwinia amylovora strain Ea01-03 plasmid pEU30, whole genome shotgun sequence
Erwinia_amylovora_IVIA2303	GCA_012366985.1	NZ_CP030267.1 Klebsiella pneumoniae subsp. pneumoniae strain SC-7 plasmid pSC7-KPC, complete sequence
Erwinia_amylovora_IVIA2303	GCA_012366985.1	NC_011148.1 Salmonella enterica subsp. enterica serovar Agona str. SL483 plasmid unnamed, complete sequence
Erwinia_amylovora_O_RG_21	GCA_012366995.1	KJ685892.1 Salmonella enterica subsp. enterica serovar Hadar strain 139.67 plasmid KVHS-004 plasmid mediated quinolone resistance protein (qnrD1) and regulator protein (rop) genes, complete cds
Erwinia_amylovora_O_RG_21	GCA_012366995.1	NZ_JAAEWH010000049.1 Erwinia amylovora strain Ea01-03 plasmid pEU30, whole genome shotgun sequence
Erwinia_amylovora_O_RG_21	GCA_012366995.1	NC_011148.1 Salmonella enterica subsp. enterica serovar Agona str. SL483 plasmid unnamed, complete sequence
Erwinia_amylovora_O_RG_21	GCA_012366995.1	NZ_JAAEWH010000068.1 Erwinia amylovora strain Ea01-03 plasmid pEA4.0, whole genome shotgun sequence
Erwinia_amylovora_O_RG_21	GCA_012366995.1	NZ_CP030267.1 Klebsiella pneumoniae subsp. pneumoniae strain SC-7 plasmid pSC7-KPC, complete sequence
Erwinia_amylovora_O_RG_21	GCA_012366995.1	IMGVR_UViG_3300031420_000044
Erwinia_amylovora_O_RG_21	GCA_012366995.1	NZ_JAAEWR010000012.1 Erwinia amylovora strain 39-I-II plasmid pEA72, whole genome shotgun sequence
Erwinia_amylovora_O_RG_21	GCA_012366995.1	CU468130.1 Erwinia tasmaniensis strain ET1/99 complete plasmid pET35
Erwinia_amylovora_O_RG_21	GCA_012366995.1	NZ_JAAEWB010000012.1 Erwinia amylovora strain Ea12 plasmid pEU30, whole genome shotgun sequence
Erwinia_amylovora_O_RG_21	GCA_012366995.1	FQ482085.1 Erwinia tasmaniensis phage phiEt88 complete genome
Erwinia_amylovora_O_RG_21	GCA_012366995.1	NZ_CP030267.1 Klebsiella pneumoniae subsp. pneumoniae strain SC-7 plasmid pSC7-KPC, complete sequence
Erwinia_amylovora_O_RG_21	GCA_012366995.1	NZ_CP030267.1 Klebsiella pneumoniae subsp. pneumoniae strain SC-7 plasmid pSC7-KPC, complete sequence
Erwinia_amylovora_O_RG_21	GCA_012366995.1	CU468130.1 Erwinia tasmaniensis strain ET1/99 complete plasmid pET35
Erwinia_amylovora_O_RG_21	GCA_012366995.1	CU468130.1 Erwinia tasmaniensis strain ET1/99 complete plasmid pET35
Erwinia_amylovora_EaLevo2	GCA_012367015.1	CU468130.1 Erwinia tasmaniensis strain ET1/99 complete plasmid pET35
Erwinia_amylovora_EaLevo2	GCA_012367015.1	CU468130.1 Erwinia tasmaniensis strain ET1/99 complete plasmid pET35
Erwinia_amylovora_EaLevo2	GCA_012367015.1	NZ_JACWHM010000027.1 Klebsiella pneumoniae strain BA9984 map unlocalized plasmid pIncN2 27, whole genome shotgun sequence
Erwinia_amylovora_EaLevo2	GCA_012367015.1	CP013971.1 Erwinia tracheiphila strain MDcuke plasmid unnamed1, complete sequence
Erwinia_amylovora_EaLevo2	GCA_012367015.1	IMGVR_UViG_3300031416_000083
Erwinia_amylovora_EaLevo2	GCA_012367015.1	FQ482085.1 Erwinia tasmaniensis phage phiEt88 complete genome
Erwinia_amylovora_EaLevo2	GCA_012367015.1	CU468130.1 Erwinia tasmaniensis strain ET1/99 complete plasmid pET35
Erwinia_amylovora_EaLevo2	GCA_012367015.1	CU468130.1 Erwinia tasmaniensis strain ET1/99 complete plasmid pET35
Erwinia_amylovora_EaG5	GCA_012367055.1	NZ_CP030267.1 Klebsiella pneumoniae subsp. pneumoniae strain SC-7 plasmid pSC7-KPC, complete sequence
Erwinia_amylovora_EaG5	GCA_012367055.1	NZ_CP030267.1 Klebsiella pneumoniae subsp. pneumoniae strain SC-7 plasmid pSC7-KPC, complete sequence
Erwinia_amylovora_EaG5	GCA_012367055.1	NZ_JAAEWH010000049.1 Erwinia amylovora strain Ea01-03 plasmid pEU30, whole genome shotgun sequence
Erwinia_amylovora_EaG5	GCA_012367055.1	NZ_JAAEWB010000012.1 Erwinia amylovora strain Ea12 plasmid pEU30, whole genome shotgun sequence
Erwinia_amylovora_EaG5	GCA_012367055.1	NZ_JAAEWH010000068.1 Erwinia amylovora strain Ea01-03 plasmid pEA4.0, whole genome shotgun sequence
Erwinia_amylovora_EaG5	GCA_012367055.1	NZ_JAAEWB010000012.1 Erwinia amylovora strain Ea12 plasmid pEU30, whole genome shotgun sequence
Erwinia_amylovora_EaG5	GCA_012367055.1	NZ_JAAEWB010000012.1 Erwinia amylovora strain Ea12 plasmid pEU30, whole genome shotgun sequence
Erwinia_amylovora_EaG5	GCA_012367055.1	NZ_JAAEWH010000049.1 Erwinia amylovora strain Ea01-03 plasmid pEU30, whole genome shotgun sequence
Erwinia_amylovora_EaG5	GCA_012367055.1	NZ_JAAEWB010000012.1 Erwinia amylovora strain Ea12 plasmid pEU30, whole genome shotgun sequence
Erwinia_amylovora_EaG5	GCA_012367055.1	NZ_JAAEWH010000049.1 Erwinia amylovora strain Ea01-03 plasmid pEU30, whole genome shotgun sequence
Erwinia_amylovora_EaG5	GCA_012367055.1	NZ_JAAEWR010000012.1 Erwinia amylovora strain 39-I-II plasmid pEA72, whole genome shotgun sequence
Erwinia_amylovora_EaG5	GCA_012367055.1	NZ_JAAEWB010000012.1 Erwinia amylovora strain Ea12 plasmid pEU30, whole genome shotgun sequence
Erwinia_amylovora_EaG5	GCA_012367055.1	NZ_CP030267.1 Klebsiella pneumoniae subsp. pneumoniae strain SC-7 plasmid pSC7-KPC, complete sequence
Erwinia_amylovora_EaG5	GCA_012367055.1	NZ_RRGT01000084.1 Escherichia coli strain FWSEC0128 map unlocalized plasmid unnamed2 FWSEC0128_contig00036, whole genome shotgun sequence
Erwinia_amylovora_EaG5	GCA_012367055.1	NZ_JAAEWB010000012.1 Erwinia amylovora strain Ea12 plasmid pEU30, whole genome shotgun sequence
Erwinia_amylovora_EaG5	GCA_012367055.1	NZ_CP030267.1 Klebsiella pneumoniae subsp. pneumoniae strain SC-7 plasmid pSC7-KPC, complete sequence
Erwinia_amylovora_EaG5	GCA_012367055.1	NZ_JAAEWB010000012.1 Erwinia amylovora strain Ea12 plasmid pEU30, whole genome shotgun sequence
Erwinia_amylovora_EaG5	GCA_012367055.1	DTR_651038
Erwinia_amylovora_EaG5	GCA_012367055.1	CU468130.1 Erwinia tasmaniensis strain ET1/99 complete plasmid pET35
Erwinia_amylovora_EaG5	GCA_012367055.1	NZ_JAAEWH010000049.1 Erwinia amylovora strain Ea01-03 plasmid pEU30, whole genome shotgun sequence
Erwinia_amylovora_EaG5	GCA_012367055.1	NZ_JAAEWB010000012.1 Erwinia amylovora strain Ea12 plasmid pEU30, whole genome shotgun sequence
Erwinia_amylovora_EaG5	GCA_012367055.1	NZ_JAAEWB010000012.1 Erwinia amylovora strain Ea12 plasmid pEU30, whole genome shotgun sequence
Erwinia_amylovora_EaG5	GCA_012367055.1	AJJI01000025.1 Klebsiella pneumoniae subsp. pneumoniae DSM 30104 = JCM 1662 = NBRC 14940 strain DSM 30104 plasmid pKPt3 Contig00025, whole genome shotgun sequence
Erwinia_amylovora_EaG5	GCA_012367055.1	NZ_JAAEWB010000012.1 Erwinia amylovora strain Ea12 plasmid pEU30, whole genome shotgun sequence
Erwinia_amylovora_EaG5	GCA_012367055.1	NZ_JAAEWB010000012.1 Erwinia amylovora strain Ea12 plasmid pEU30, whole genome shotgun sequence
Erwinia_amylovora_EaG5	GCA_012367055.1	NZ_JAAEWB010000012.1 Erwinia amylovora strain Ea12 plasmid pEU30, whole genome shotgun sequence
Erwinia_amylovora_EaG5	GCA_012367055.1	NZ_JAAEWB010000012.1 Erwinia amylovora strain Ea12 plasmid pEU30, whole genome shotgun sequence
Erwinia_amylovora_EaG5	GCA_012367055.1	NZ_JAAEWB010000012.1 Erwinia amylovora strain Ea12 plasmid pEU30, whole genome shotgun sequence
Erwinia_amylovora_EaG5	GCA_012367055.1	NZ_JAAEWB010000012.1 Erwinia amylovora strain Ea12 plasmid pEU30, whole genome shotgun sequence
Erwinia_amylovora_EaG5	GCA_012367055.1	NZ_CP030267.1 Klebsiella pneumoniae subsp. pneumoniae strain SC-7 plasmid pSC7-KPC, complete sequence
Erwinia_amylovora_EaG5	GCA_012367055.1	NZ_JAAEWB010000012.1 Erwinia amylovora strain Ea12 plasmid pEU30, whole genome shotgun sequence
Erwinia_amylovora_EaG5	GCA_012367055.1	NZ_CP028352.1 Pantoea vagans strain PV989 plasmid pPV989-94, complete sequence
Erwinia_amylovora_EaG5	GCA_012367055.1	NZ_JAAEWB010000012.1 Erwinia amylovora strain Ea12 plasmid pEU30, whole genome shotgun sequence
Erwinia_amylovora_EaG5	GCA_012367055.1	NZ_JAAEWB010000012.1 Erwinia amylovora strain Ea12 plasmid pEU30, whole genome shotgun sequence
Erwinia_amylovora_EaG5	GCA_012367055.1	IMGVR_UViG_3300030005_000023
Erwinia_amylovora_EaG5	GCA_012367055.1	NZ_JAAEWB010000012.1 Erwinia amylovora strain Ea12 plasmid pEU30, whole genome shotgun sequence
Erwinia_amylovora_EaG5	GCA_012367055.1	NZ_JAAEWB010000012.1 Erwinia amylovora strain Ea12 plasmid pEU30, whole genome shotgun sequence
Erwinia_amylovora_EaG5	GCA_012367055.1	NZ_CP054046.1 Yersinia massiliensis strain 2011N-4075 plasmid unnamed1, complete sequence
Erwinia_amylovora_EaG5	GCA_012367055.1	IMGVR_UViG_3300031151_000085
Erwinia_amylovora_EaG5	GCA_012367055.1	NZ_JAAEWB010000012.1 Erwinia amylovora strain Ea12 plasmid pEU30, whole genome shotgun sequence
Erwinia_amylovora_EaG5	GCA_012367055.1	NZ_JAAEWB010000012.1 Erwinia amylovora strain Ea12 plasmid pEU30, whole genome shotgun sequence
Erwinia_amylovora_EaG5	GCA_012367055.1	NZ_JAAEWB010000012.1 Erwinia amylovora strain Ea12 plasmid pEU30, whole genome shotgun sequence
Erwinia_amylovora_EaG5	GCA_012367055.1	NZ_JAAEWB010000012.1 Erwinia amylovora strain Ea12 plasmid pEU30, whole genome shotgun sequence
Erwinia_amylovora_EaG5	GCA_012367055.1	NZ_JAAEWB010000012.1 Erwinia amylovora strain Ea12 plasmid pEU30, whole genome shotgun sequence
Erwinia_amylovora_EaG5	GCA_012367055.1	NZ_JAAEWH010000049.1 Erwinia amylovora strain Ea01-03 plasmid pEU30, whole genome shotgun sequence
Erwinia_amylovora_EaG5	GCA_012367055.1	NZ_JAAEWB010000012.1 Erwinia amylovora strain Ea12 plasmid pEU30, whole genome shotgun sequence
Erwinia_amylovora_EaG5	GCA_012367055.1	NZ_JAAEWH010000049.1 Erwinia amylovora strain Ea01-03 plasmid pEU30, whole genome shotgun sequence
Erwinia_amylovora_EaG5	GCA_012367055.1	CU468130.1 Erwinia tasmaniensis strain ET1/99 complete plasmid pET35
Erwinia_amylovora_EaG5	GCA_012367055.1	NZ_JAAEWH010000049.1 Erwinia amylovora strain Ea01-03 plasmid pEU30, whole genome shotgun sequence
Erwinia_amylovora_EaG5	GCA_012367055.1	NZ_JAAEWH010000049.1 Erwinia amylovora strain Ea01-03 plasmid pEU30, whole genome shotgun sequence
Erwinia_amylovora_EaG5	GCA_012367055.1	NZ_JAAEWB010000012.1 Erwinia amylovora strain Ea12 plasmid pEU30, whole genome shotgun sequence
Erwinia_amylovora_EaG5	GCA_012367055.1	NZ_JAAEWB010000012.1 Erwinia amylovora strain Ea12 plasmid pEU30, whole genome shotgun sequence
Erwinia_amylovora_EaG5	GCA_012367055.1	FQ482085.1 Erwinia tasmaniensis phage phiEt88 complete genome
Erwinia_amylovora_EaG5	GCA_012367055.1	NZ_JAAEWB010000012.1 Erwinia amylovora strain Ea12 plasmid pEU30, whole genome shotgun sequence
Erwinia_amylovora_EaG5	GCA_012367055.1	NZ_JAAEWH010000049.1 Erwinia amylovora strain Ea01-03 plasmid pEU30, whole genome shotgun sequence
Erwinia_amylovora_EaG5	GCA_012367055.1	NZ_JAAEWB010000012.1 Erwinia amylovora strain Ea12 plasmid pEU30, whole genome shotgun sequence
Erwinia_amylovora_EaG5	GCA_012367055.1	NZ_JAAEWB010000012.1 Erwinia amylovora strain Ea12 plasmid pEU30, whole genome shotgun sequence
Erwinia_amylovora_EaG5	GCA_012367055.1	NZ_JAAEWB010000012.1 Erwinia amylovora strain Ea12 plasmid pEU30, whole genome shotgun sequence
Erwinia_amylovora_EaG5	GCA_012367055.1	KJ685892.1 Salmonella enterica subsp. enterica serovar Hadar strain 139.67 plasmid KVHS-004 plasmid mediated quinolone resistance protein (qnrD1) and regulator protein (rop) genes, complete cds
Erwinia_amylovora_EaG5	GCA_012367055.1	NZ_JAAEWH010000049.1 Erwinia amylovora strain Ea01-03 plasmid pEU30, whole genome shotgun sequence
Erwinia_amylovora_EaG5	GCA_012367055.1	NZ_JAAEWB010000012.1 Erwinia amylovora strain Ea12 plasmid pEU30, whole genome shotgun sequence
Erwinia_amylovora_EaG5	GCA_012367055.1	NZ_JAAEWH010000049.1 Erwinia amylovora strain Ea01-03 plasmid pEU30, whole genome shotgun sequence
Erwinia_amylovora_EaG5	GCA_012367055.1	NZ_JAAEWH010000049.1 Erwinia amylovora strain Ea01-03 plasmid pEU30, whole genome shotgun sequence
Erwinia_amylovora_EaG5	GCA_012367055.1	NZ_JAAEWB010000012.1 Erwinia amylovora strain Ea12 plasmid pEU30, whole genome shotgun sequence
Erwinia_amylovora_EaG5	GCA_012367055.1	NC_005814.1 Yersinia pestis biovar Microtus str. 91001 plasmid pCRY, complete sequence
Erwinia_amylovora_EaG5	GCA_012367055.1	NZ_JAAEWB010000012.1 Erwinia amylovora strain Ea12 plasmid pEU30, whole genome shotgun sequence
Erwinia_amylovora_EaG5	GCA_012367055.1	NZ_JAAEWB010000012.1 Erwinia amylovora strain Ea12 plasmid pEU30, whole genome shotgun sequence
Erwinia_amylovora_EaG5	GCA_012367055.1	NZ_JAAEWH010000049.1 Erwinia amylovora strain Ea01-03 plasmid pEU30, whole genome shotgun sequence
Erwinia_amylovora_EaG5	GCA_012367055.1	BK049330.1 TPA_asm: Myoviridae sp. isolate ct8vj1, partial genome
Erwinia_amylovora_EaG5	GCA_012367055.1	NZ_JAAEWH010000049.1 Erwinia amylovora strain Ea01-03 plasmid pEU30, whole genome shotgun sequence
Erwinia_amylovora_EaG5	GCA_012367055.1	NZ_JAAEWB010000012.1 Erwinia amylovora strain Ea12 plasmid pEU30, whole genome shotgun sequence
Erwinia_amylovora_EaG5	GCA_012367055.1	NZ_JAAEWB010000012.1 Erwinia amylovora strain Ea12 plasmid pEU30, whole genome shotgun sequence
Erwinia_amylovora_EaG5	GCA_012367055.1	NZ_JAAEWH010000049.1 Erwinia amylovora strain Ea01-03 plasmid pEU30, whole genome shotgun sequence
Erwinia_amylovora_EaA_11	GCA_012367075.1	CU468130.1 Erwinia tasmaniensis strain ET1/99 complete plasmid pET35
Erwinia_amylovora_EaA_11	GCA_012367075.1	BK049330.1 TPA_asm: Myoviridae sp. isolate ct8vj1, partial genome
Erwinia_amylovora_EaA_11	GCA_012367075.1	NZ_CP030267.1 Klebsiella pneumoniae subsp. pneumoniae strain SC-7 plasmid pSC7-KPC, complete sequence
Erwinia_amylovora_EaA_11	GCA_012367075.1	CU468130.1 Erwinia tasmaniensis strain ET1/99 complete plasmid pET35
Erwinia_amylovora_EaA_11	GCA_012367075.1	NC_005814.1 Yersinia pestis biovar Microtus str. 91001 plasmid pCRY, complete sequence
Erwinia_amylovora_EaA_11	GCA_012367075.1	NZ_JAAEWB010000012.1 Erwinia amylovora strain Ea12 plasmid pEU30, whole genome shotgun sequence
Erwinia_amylovora_EaA_11	GCA_012367075.1	NZ_JAAEWH010000049.1 Erwinia amylovora strain Ea01-03 plasmid pEU30, whole genome shotgun sequence
Erwinia_amylovora_EaA_11	GCA_012367075.1	NZ_CP030267.1 Klebsiella pneumoniae subsp. pneumoniae strain SC-7 plasmid pSC7-KPC, complete sequence
Erwinia_amylovora_EaA_11	GCA_012367075.1	KJ685892.1 Salmonella enterica subsp. enterica serovar Hadar strain 139.67 plasmid KVHS-004 plasmid mediated quinolone resistance protein (qnrD1) and regulator protein (rop) genes, complete cds
Erwinia_amylovora_EaA_11	GCA_012367075.1	NZ_JAAEWR010000012.1 Erwinia amylovora strain 39-I-II plasmid pEA72, whole genome shotgun sequence
Erwinia_amylovora_EaA_11	GCA_012367075.1	NZ_JAAEWH010000068.1 Erwinia amylovora strain Ea01-03 plasmid pEA4.0, whole genome shotgun sequence
Erwinia_amylovora_EaA_11	GCA_012367075.1	IMGVR_UViG_3300031420_000044
Erwinia_amylovora_EaA_11	GCA_012367075.1	NC_011148.1 Salmonella enterica subsp. enterica serovar Agona str. SL483 plasmid unnamed, complete sequence
Erwinia_amylovora_EaA_11	GCA_012367075.1	CU468130.1 Erwinia tasmaniensis strain ET1/99 complete plasmid pET35
Erwinia_amylovora_EaA_11	GCA_012367075.1	NZ_CP028352.1 Pantoea vagans strain PV989 plasmid pPV989-94, complete sequence
Erwinia_amylovora_Ea8_96	GCA_012367085.1	NZ_JACWHM010000027.1 Klebsiella pneumoniae strain BA9984 map unlocalized plasmid pIncN2 27, whole genome shotgun sequence
Erwinia_amylovora_Ea8_96	GCA_012367085.1	NZ_CP030267.1 Klebsiella pneumoniae subsp. pneumoniae strain SC-7 plasmid pSC7-KPC, complete sequence
Erwinia_amylovora_Ea8_96	GCA_012367085.1	BK032193.1 TPA_asm: Siphoviridae sp. isolate ctMwi1, partial genome
Erwinia_amylovora_Ea8_96	GCA_012367085.1	IMGVR_UViG_3300028586_000174
Erwinia_amylovora_Ea8_96	GCA_012367085.1	NZ_QHMI01000031.1 Enterobacter hormaechei strain PECIMP map unlocalized plasmid punnamed2 NODE_31_length_40047_cov_12.1539_pilon_IMP, whole genome shotgun sequence
Erwinia_amylovora_Ea8_96	GCA_012367085.1	FQ482085.1 Erwinia tasmaniensis phage phiEt88 complete genome
Erwinia_amylovora_Ea8_96	GCA_012367085.1	NZ_JACWHM010000027.1 Klebsiella pneumoniae strain BA9984 map unlocalized plasmid pIncN2 27, whole genome shotgun sequence
Erwinia_amylovora_Ea8_96	GCA_012367085.1	CP013971.1 Erwinia tracheiphila strain MDcuke plasmid unnamed1, complete sequence
Erwinia_amylovora_Ea92_1_2	GCA_012367095.1	BK049330.1 TPA_asm: Myoviridae sp. isolate ct8vj1, partial genome
Erwinia_amylovora_Ea92_1_2	GCA_012367095.1	CU468130.1 Erwinia tasmaniensis strain ET1/99 complete plasmid pET35
Erwinia_amylovora_Ea92_1_2	GCA_012367095.1	NC_011148.1 Salmonella enterica subsp. enterica serovar Agona str. SL483 plasmid unnamed, complete sequence
Erwinia_amylovora_Ea92_1_2	GCA_012367095.1	CU468130.1 Erwinia tasmaniensis strain ET1/99 complete plasmid pET35
Erwinia_amylovora_Ea92_1_2	GCA_012367095.1	NZ_JAAEWH010000049.1 Erwinia amylovora strain Ea01-03 plasmid pEU30, whole genome shotgun sequence
Erwinia_amylovora_Ea92_1_2	GCA_012367095.1	NZ_CP030267.1 Klebsiella pneumoniae subsp. pneumoniae strain SC-7 plasmid pSC7-KPC, complete sequence
Erwinia_amylovora_Ea92_1_2	GCA_012367095.1	NZ_JAAEWH010000068.1 Erwinia amylovora strain Ea01-03 plasmid pEA4.0, whole genome shotgun sequence
Erwinia_amylovora_Ea92_1_2	GCA_012367095.1	NZ_CP028352.1 Pantoea vagans strain PV989 plasmid pPV989-94, complete sequence
Erwinia_amylovora_Ea92_1_2	GCA_012367095.1	NC_005814.1 Yersinia pestis biovar Microtus str. 91001 plasmid pCRY, complete sequence
Erwinia_amylovora_Ea92_1_2	GCA_012367095.1	NZ_JAAEWB010000012.1 Erwinia amylovora strain Ea12 plasmid pEU30, whole genome shotgun sequence
Erwinia_amylovora_Ea92_1_2	GCA_012367095.1	NZ_CP030267.1 Klebsiella pneumoniae subsp. pneumoniae strain SC-7 plasmid pSC7-KPC, complete sequence
Erwinia_amylovora_Ea92_1_2	GCA_012367095.1	FQ482085.1 Erwinia tasmaniensis phage phiEt88 complete genome
Erwinia_amylovora_Ea92_1_2	GCA_012367095.1	KJ685892.1 Salmonella enterica subsp. enterica serovar Hadar strain 139.67 plasmid KVHS-004 plasmid mediated quinolone resistance protein (qnrD1) and regulator protein (rop) genes, complete cds
Erwinia_amylovora_Ea92_1_2	GCA_012367095.1	NZ_CP030267.1 Klebsiella pneumoniae subsp. pneumoniae strain SC-7 plasmid pSC7-KPC, complete sequence
Erwinia_amylovora_Ea92_1_2	GCA_012367095.1	IMGVR_UViG_3300031420_000044
Erwinia_amylovora_Ea92_1_2	GCA_012367095.1	NZ_JAAEWR010000012.1 Erwinia amylovora strain 39-I-II plasmid pEA72, whole genome shotgun sequence
Erwinia_amylovora_Ea92_1_2	GCA_012367095.1	CU468130.1 Erwinia tasmaniensis strain ET1/99 complete plasmid pET35
Erwinia_amylovora_Ea6_97	GCA_012367125.1	NZ_JAAEWH010000068.1 Erwinia amylovora strain Ea01-03 plasmid pEA4.0, whole genome shotgun sequence
Erwinia_amylovora_Ea6_97	GCA_012367125.1	NZ_JAAEWH010000049.1 Erwinia amylovora strain Ea01-03 plasmid pEU30, whole genome shotgun sequence
Erwinia_amylovora_Ea6_97	GCA_012367125.1	FQ482085.1 Erwinia tasmaniensis phage phiEt88 complete genome
Erwinia_amylovora_Ea6_97	GCA_012367125.1	NZ_CP030267.1 Klebsiella pneumoniae subsp. pneumoniae strain SC-7 plasmid pSC7-KPC, complete sequence
Erwinia_amylovora_Ea6_97	GCA_012367125.1	IMGVR_UViG_3300031420_000044
Erwinia_amylovora_Ea6_97	GCA_012367125.1	KJ685892.1 Salmonella enterica subsp. enterica serovar Hadar strain 139.67 plasmid KVHS-004 plasmid mediated quinolone resistance protein (qnrD1) and regulator protein (rop) genes, complete cds
Erwinia_amylovora_Ea6_97	GCA_012367125.1	NZ_JAAEWR010000012.1 Erwinia amylovora strain 39-I-II plasmid pEA72, whole genome shotgun sequence
Erwinia_amylovora_Ea6_97	GCA_012367125.1	NZ_CP030267.1 Klebsiella pneumoniae subsp. pneumoniae strain SC-7 plasmid pSC7-KPC, complete sequence
Erwinia_amylovora_Ea6_97	GCA_012367125.1	NZ_CP028352.1 Pantoea vagans strain PV989 plasmid pPV989-94, complete sequence
Erwinia_amylovora_Ea6_97	GCA_012367125.1	NZ_JAAEWB010000012.1 Erwinia amylovora strain Ea12 plasmid pEU30, whole genome shotgun sequence
Erwinia_amylovora_Ea6_97	GCA_012367125.1	BK049330.1 TPA_asm: Myoviridae sp. isolate ct8vj1, partial genome
Erwinia_amylovora_Ea6_97	GCA_012367125.1	NC_011148.1 Salmonella enterica subsp. enterica serovar Agona str. SL483 plasmid unnamed, complete sequence
Erwinia_amylovora_Ea6_97	GCA_012367125.1	NC_005814.1 Yersinia pestis biovar Microtus str. 91001 plasmid pCRY, complete sequence
Erwinia_amylovora_Ea6_97	GCA_012367125.1	CU468130.1 Erwinia tasmaniensis strain ET1/99 complete plasmid pET35
Erwinia_amylovora_Ea6_97	GCA_012367125.1	CU468130.1 Erwinia tasmaniensis strain ET1/99 complete plasmid pET35
Erwinia_amylovora_Ea6_97	GCA_012367125.1	CU468130.1 Erwinia tasmaniensis strain ET1/99 complete plasmid pET35
Erwinia_amylovora_Ea6_97	GCA_012367125.1	NZ_CP030267.1 Klebsiella pneumoniae subsp. pneumoniae strain SC-7 plasmid pSC7-KPC, complete sequence
Erwinia_amylovora_Ea650	GCA_012367155.1	IMGVR_UViG_3300031420_000044
Erwinia_amylovora_Ea650	GCA_012367155.1	CU468130.1 Erwinia tasmaniensis strain ET1/99 complete plasmid pET35
Erwinia_amylovora_Ea650	GCA_012367155.1	NZ_JAAEWR010000012.1 Erwinia amylovora strain 39-I-II plasmid pEA72, whole genome shotgun sequence
Erwinia_amylovora_Ea650	GCA_012367155.1	NZ_CP030267.1 Klebsiella pneumoniae subsp. pneumoniae strain SC-7 plasmid pSC7-KPC, complete sequence
Erwinia_amylovora_Ea650	GCA_012367155.1	KJ685892.1 Salmonella enterica subsp. enterica serovar Hadar strain 139.67 plasmid KVHS-004 plasmid mediated quinolone resistance protein (qnrD1) and regulator protein (rop) genes, complete cds
Erwinia_amylovora_Ea650	GCA_012367155.1	NZ_CP030267.1 Klebsiella pneumoniae subsp. pneumoniae strain SC-7 plasmid pSC7-KPC, complete sequence
Erwinia_amylovora_Ea650	GCA_012367155.1	NC_011148.1 Salmonella enterica subsp. enterica serovar Agona str. SL483 plasmid unnamed, complete sequence
Erwinia_amylovora_Ea650	GCA_012367155.1	NZ_JAAEWH010000068.1 Erwinia amylovora strain Ea01-03 plasmid pEA4.0, whole genome shotgun sequence
Erwinia_amylovora_Ea650	GCA_012367155.1	NC_005814.1 Yersinia pestis biovar Microtus str. 91001 plasmid pCRY, complete sequence
Erwinia_amylovora_Ea650	GCA_012367155.1	CU468130.1 Erwinia tasmaniensis strain ET1/99 complete plasmid pET35
Erwinia_amylovora_Ea650	GCA_012367155.1	NZ_CP030267.1 Klebsiella pneumoniae subsp. pneumoniae strain SC-7 plasmid pSC7-KPC, complete sequence
Erwinia_amylovora_Ea650	GCA_012367155.1	NZ_CP028352.1 Pantoea vagans strain PV989 plasmid pPV989-94, complete sequence
Erwinia_amylovora_Ea650	GCA_012367155.1	FQ482085.1 Erwinia tasmaniensis phage phiEt88 complete genome
Erwinia_amylovora_Ea650	GCA_012367155.1	CU468130.1 Erwinia tasmaniensis strain ET1/99 complete plasmid pET35
Erwinia_amylovora_Ea650	GCA_012367155.1	NZ_JAAEWB010000012.1 Erwinia amylovora strain Ea12 plasmid pEU30, whole genome shotgun sequence
Erwinia_amylovora_Ea650	GCA_012367155.1	BK049330.1 TPA_asm: Myoviridae sp. isolate ct8vj1, partial genome
Erwinia_amylovora_Ea650	GCA_012367155.1	NZ_JAAEWH010000049.1 Erwinia amylovora strain Ea01-03 plasmid pEU30, whole genome shotgun sequence
Erwinia_amylovora_Ea5_97	GCA_012367165.1	NC_005814.1 Yersinia pestis biovar Microtus str. 91001 plasmid pCRY, complete sequence
Erwinia_amylovora_Ea5_97	GCA_012367165.1	NZ_JAAEWB010000012.1 Erwinia amylovora strain Ea12 plasmid pEU30, whole genome shotgun sequence
Erwinia_amylovora_Ea5_97	GCA_012367165.1	NZ_JAAEWR010000012.1 Erwinia amylovora strain 39-I-II plasmid pEA72, whole genome shotgun sequence
Erwinia_amylovora_Ea5_97	GCA_012367165.1	IMGVR_UViG_3300031420_000044
Erwinia_amylovora_Ea5_97	GCA_012367165.1	FQ482085.1 Erwinia tasmaniensis phage phiEt88 complete genome
Erwinia_amylovora_Ea5_97	GCA_012367165.1	NZ_CP030267.1 Klebsiella pneumoniae subsp. pneumoniae strain SC-7 plasmid pSC7-KPC, complete sequence
Erwinia_amylovora_Ea5_97	GCA_012367165.1	NZ_CP028352.1 Pantoea vagans strain PV989 plasmid pPV989-94, complete sequence
Erwinia_amylovora_Ea5_97	GCA_012367165.1	KJ685892.1 Salmonella enterica subsp. enterica serovar Hadar strain 139.67 plasmid KVHS-004 plasmid mediated quinolone resistance protein (qnrD1) and regulator protein (rop) genes, complete cds
Erwinia_amylovora_Ea5_97	GCA_012367165.1	NZ_JAAEWH010000068.1 Erwinia amylovora strain Ea01-03 plasmid pEA4.0, whole genome shotgun sequence
Erwinia_amylovora_Ea5_97	GCA_012367165.1	CU468130.1 Erwinia tasmaniensis strain ET1/99 complete plasmid pET35
Erwinia_amylovora_Ea5_97	GCA_012367165.1	CU468130.1 Erwinia tasmaniensis strain ET1/99 complete plasmid pET35
Erwinia_amylovora_Ea5_97	GCA_012367165.1	NZ_CP030267.1 Klebsiella pneumoniae subsp. pneumoniae strain SC-7 plasmid pSC7-KPC, complete sequence
Erwinia_amylovora_Ea5_97	GCA_012367165.1	BK049330.1 TPA_asm: Myoviridae sp. isolate ct8vj1, partial genome
Erwinia_amylovora_Ea5_97	GCA_012367165.1	NC_011148.1 Salmonella enterica subsp. enterica serovar Agona str. SL483 plasmid unnamed, complete sequence
Erwinia_amylovora_Ea5_97	GCA_012367165.1	NZ_JAAEWH010000049.1 Erwinia amylovora strain Ea01-03 plasmid pEU30, whole genome shotgun sequence
Erwinia_amylovora_Ea5_97	GCA_012367165.1	NZ_CP030267.1 Klebsiella pneumoniae subsp. pneumoniae strain SC-7 plasmid pSC7-KPC, complete sequence
Erwinia_amylovora_Ea4_96	GCA_012367175.1	FQ482085.1 Erwinia tasmaniensis phage phiEt88 complete genome
Erwinia_amylovora_Ea4_96	GCA_012367175.1	NZ_JAAEWH010000049.1 Erwinia amylovora strain Ea01-03 plasmid pEU30, whole genome shotgun sequence
Erwinia_amylovora_Ea4_96	GCA_012367175.1	NZ_HG813238.1 Erwinia amylovora strain 692 plasmid II, complete sequence
Erwinia_amylovora_Ea4_96	GCA_012367175.1	IMGVR_UViG_3300031416_000056
Erwinia_amylovora_Ea4_96	GCA_012367175.1	IMGVR_UViG_3300031134_000061
Erwinia_amylovora_Ea4_96	GCA_012367175.1	FQ482085.1 Erwinia tasmaniensis phage phiEt88 complete genome
Erwinia_amylovora_Ea4_96	GCA_012367175.1	IMGVR_UViG_3300027807_000005
Erwinia_amylovora_Ea4_96	GCA_012367175.1	IMGVR_UViG_3300031372_000008
Erwinia_amylovora_Ea4_97	GCA_012367185.1	NZ_JAAEWR010000012.1 Erwinia amylovora strain 39-I-II plasmid pEA72, whole genome shotgun sequence
Erwinia_amylovora_Ea4_97	GCA_012367185.1	KJ685892.1 Salmonella enterica subsp. enterica serovar Hadar strain 139.67 plasmid KVHS-004 plasmid mediated quinolone resistance protein (qnrD1) and regulator protein (rop) genes, complete cds
Erwinia_amylovora_Ea4_97	GCA_012367185.1	NZ_CP030267.1 Klebsiella pneumoniae subsp. pneumoniae strain SC-7 plasmid pSC7-KPC, complete sequence
Erwinia_amylovora_Ea4_97	GCA_012367185.1	NZ_JAAEWB010000012.1 Erwinia amylovora strain Ea12 plasmid pEU30, whole genome shotgun sequence
Erwinia_amylovora_Ea4_97	GCA_012367185.1	BK049330.1 TPA_asm: Myoviridae sp. isolate ct8vj1, partial genome
Erwinia_amylovora_Ea4_97	GCA_012367185.1	CU468130.1 Erwinia tasmaniensis strain ET1/99 complete plasmid pET35
Erwinia_amylovora_Ea4_97	GCA_012367185.1	NZ_CP030267.1 Klebsiella pneumoniae subsp. pneumoniae strain SC-7 plasmid pSC7-KPC, complete sequence
Erwinia_amylovora_Ea4_97	GCA_012367185.1	CU468130.1 Erwinia tasmaniensis strain ET1/99 complete plasmid pET35
Erwinia_amylovora_Ea4_97	GCA_012367185.1	NZ_CP030267.1 Klebsiella pneumoniae subsp. pneumoniae strain SC-7 plasmid pSC7-KPC, complete sequence
Erwinia_amylovora_Ea4_97	GCA_012367185.1	IMGVR_UViG_3300031420_000044
Erwinia_amylovora_Ea4_97	GCA_012367185.1	FQ482085.1 Erwinia tasmaniensis phage phiEt88 complete genome
Erwinia_amylovora_Ea4_97	GCA_012367185.1	NC_011148.1 Salmonella enterica subsp. enterica serovar Agona str. SL483 plasmid unnamed, complete sequence
Erwinia_amylovora_Ea4_97	GCA_012367185.1	NC_005814.1 Yersinia pestis biovar Microtus str. 91001 plasmid pCRY, complete sequence
Erwinia_amylovora_Ea4_97	GCA_012367185.1	NZ_JAAEWH010000049.1 Erwinia amylovora strain Ea01-03 plasmid pEU30, whole genome shotgun sequence
Erwinia_amylovora_Ea4_97	GCA_012367185.1	NZ_CP028352.1 Pantoea vagans strain PV989 plasmid pPV989-94, complete sequence
Erwinia_amylovora_Ea4_97	GCA_012367185.1	NZ_JAAEWH010000068.1 Erwinia amylovora strain Ea01-03 plasmid pEA4.0, whole genome shotgun sequence
Erwinia_amylovora_Ea440	GCA_012367195.1	NZ_JAAEWH010000068.1 Erwinia amylovora strain Ea01-03 plasmid pEA4.0, whole genome shotgun sequence
Erwinia_amylovora_Ea440	GCA_012367195.1	NZ_CP030267.1 Klebsiella pneumoniae subsp. pneumoniae strain SC-7 plasmid pSC7-KPC, complete sequence
Erwinia_amylovora_Ea440	GCA_012367195.1	NC_011148.1 Salmonella enterica subsp. enterica serovar Agona str. SL483 plasmid unnamed, complete sequence
Erwinia_amylovora_Ea440	GCA_012367195.1	FQ482085.1 Erwinia tasmaniensis phage phiEt88 complete genome
Erwinia_amylovora_Ea440	GCA_012367195.1	NZ_JAAEWH010000049.1 Erwinia amylovora strain Ea01-03 plasmid pEU30, whole genome shotgun sequence
Erwinia_amylovora_Ea440	GCA_012367195.1	NC_005814.1 Yersinia pestis biovar Microtus str. 91001 plasmid pCRY, complete sequence
Erwinia_amylovora_Ea440	GCA_012367195.1	NZ_CP030267.1 Klebsiella pneumoniae subsp. pneumoniae strain SC-7 plasmid pSC7-KPC, complete sequence
Erwinia_amylovora_Ea440	GCA_012367195.1	BK049330.1 TPA_asm: Myoviridae sp. isolate ct8vj1, partial genome
Erwinia_amylovora_Ea440	GCA_012367195.1	CU468130.1 Erwinia tasmaniensis strain ET1/99 complete plasmid pET35
Erwinia_amylovora_Ea440	GCA_012367195.1	KJ685892.1 Salmonella enterica subsp. enterica serovar Hadar strain 139.67 plasmid KVHS-004 plasmid mediated quinolone resistance protein (qnrD1) and regulator protein (rop) genes, complete cds
Erwinia_amylovora_Ea440	GCA_012367195.1	NZ_CP030267.1 Klebsiella pneumoniae subsp. pneumoniae strain SC-7 plasmid pSC7-KPC, complete sequence
Erwinia_amylovora_Ea440	GCA_012367195.1	NZ_CP028352.1 Pantoea vagans strain PV989 plasmid pPV989-94, complete sequence
Erwinia_amylovora_Ea440	GCA_012367195.1	NZ_JAAEWR010000012.1 Erwinia amylovora strain 39-I-II plasmid pEA72, whole genome shotgun sequence
Erwinia_amylovora_Ea435	GCA_012367255.1	IMGVR_UViG_3300031420_000044
Erwinia_amylovora_Ea435	GCA_012367255.1	BK049330.1 TPA_asm: Myoviridae sp. isolate ct8vj1, partial genome
Erwinia_amylovora_Ea435	GCA_012367255.1	NZ_JAAEWR010000012.1 Erwinia amylovora strain 39-I-II plasmid pEA72, whole genome shotgun sequence
Erwinia_amylovora_Ea435	GCA_012367255.1	NZ_CP030267.1 Klebsiella pneumoniae subsp. pneumoniae strain SC-7 plasmid pSC7-KPC, complete sequence
Erwinia_amylovora_Ea435	GCA_012367255.1	KJ685892.1 Salmonella enterica subsp. enterica serovar Hadar strain 139.67 plasmid KVHS-004 plasmid mediated quinolone resistance protein (qnrD1) and regulator protein (rop) genes, complete cds
Erwinia_amylovora_Ea435	GCA_012367255.1	NZ_CP030267.1 Klebsiella pneumoniae subsp. pneumoniae strain SC-7 plasmid pSC7-KPC, complete sequence
Erwinia_amylovora_Ea435	GCA_012367255.1	NZ_JAAEWH010000049.1 Erwinia amylovora strain Ea01-03 plasmid pEU30, whole genome shotgun sequence
Erwinia_amylovora_Ea435	GCA_012367255.1	NZ_JAAEWH010000068.1 Erwinia amylovora strain Ea01-03 plasmid pEA4.0, whole genome shotgun sequence
Erwinia_amylovora_Ea435	GCA_012367255.1	NZ_CP028352.1 Pantoea vagans strain PV989 plasmid pPV989-94, complete sequence
Erwinia_amylovora_Ea435	GCA_012367255.1	CU468130.1 Erwinia tasmaniensis strain ET1/99 complete plasmid pET35
Erwinia_amylovora_Ea435	GCA_012367255.1	FQ482085.1 Erwinia tasmaniensis phage phiEt88 complete genome
Erwinia_amylovora_Ea435	GCA_012367255.1	NC_011148.1 Salmonella enterica subsp. enterica serovar Agona str. SL483 plasmid unnamed, complete sequence
Erwinia_amylovora_Ea435	GCA_012367255.1	NC_005814.1 Yersinia pestis biovar Microtus str. 91001 plasmid pCRY, complete sequence
Erwinia_amylovora_Ea435	GCA_012367255.1	NZ_CP030267.1 Klebsiella pneumoniae subsp. pneumoniae strain SC-7 plasmid pSC7-KPC, complete sequence
Erwinia_amylovora_Ea435	GCA_012367255.1	CU468130.1 Erwinia tasmaniensis strain ET1/99 complete plasmid pET35
Erwinia_amylovora_Ea3a_H1_II	GCA_012367265.1	CU468130.1 Erwinia tasmaniensis strain ET1/99 complete plasmid pET35
Erwinia_amylovora_Ea3a_H1_II	GCA_012367265.1	NZ_JAAEWR010000012.1 Erwinia amylovora strain 39-I-II plasmid pEA72, whole genome shotgun sequence
Erwinia_amylovora_Ea3a_H1_II	GCA_012367265.1	NZ_JAAEWB010000012.1 Erwinia amylovora strain Ea12 plasmid pEU30, whole genome shotgun sequence
Erwinia_amylovora_Ea3a_H1_II	GCA_012367265.1	NZ_JAAEWH010000049.1 Erwinia amylovora strain Ea01-03 plasmid pEU30, whole genome shotgun sequence
Erwinia_amylovora_Ea3a_H1_II	GCA_012367265.1	NZ_CP030267.1 Klebsiella pneumoniae subsp. pneumoniae strain SC-7 plasmid pSC7-KPC, complete sequence
Erwinia_amylovora_Ea3a_H1_II	GCA_012367265.1	NZ_CP028352.1 Pantoea vagans strain PV989 plasmid pPV989-94, complete sequence
Erwinia_amylovora_Ea3a_H1_II	GCA_012367265.1	IMGVR_UViG_3300031420_000044
Erwinia_amylovora_Ea3a_H1_II	GCA_012367265.1	NC_005814.1 Yersinia pestis biovar Microtus str. 91001 plasmid pCRY, complete sequence
Erwinia_amylovora_Ea3a_H1_II	GCA_012367265.1	CU468130.1 Erwinia tasmaniensis strain ET1/99 complete plasmid pET35
Erwinia_amylovora_Ea3a_H1_II	GCA_012367265.1	KJ685892.1 Salmonella enterica subsp. enterica serovar Hadar strain 139.67 plasmid KVHS-004 plasmid mediated quinolone resistance protein (qnrD1) and regulator protein (rop) genes, complete cds
Erwinia_amylovora_Ea3a_H1_II	GCA_012367265.1	NZ_JAAEWH010000068.1 Erwinia amylovora strain Ea01-03 plasmid pEA4.0, whole genome shotgun sequence
Erwinia_amylovora_Ea3a_H1_II	GCA_012367265.1	CU468130.1 Erwinia tasmaniensis strain ET1/99 complete plasmid pET35
Erwinia_amylovora_Ea3a_H1_II	GCA_012367265.1	NZ_CP030267.1 Klebsiella pneumoniae subsp. pneumoniae strain SC-7 plasmid pSC7-KPC, complete sequence
Erwinia_amylovora_Ea3a_H1_II	GCA_012367265.1	BK049330.1 TPA_asm: Myoviridae sp. isolate ct8vj1, partial genome
Erwinia_amylovora_Ea3a_H1_II	GCA_012367265.1	NZ_CP030267.1 Klebsiella pneumoniae subsp. pneumoniae strain SC-7 plasmid pSC7-KPC, complete sequence
Erwinia_amylovora_Ea3a_H1_II	GCA_012367265.1	NC_011148.1 Salmonella enterica subsp. enterica serovar Agona str. SL483 plasmid unnamed, complete sequence
Erwinia_amylovora_Ea3a_H1_II	GCA_012367265.1	FQ482085.1 Erwinia tasmaniensis phage phiEt88 complete genome
Erwinia_amylovora_Ea367	GCA_012367305.1	FQ482085.1 Erwinia tasmaniensis phage phiEt88 complete genome
Erwinia_amylovora_Ea367	GCA_012367305.1	NC_011148.1 Salmonella enterica subsp. enterica serovar Agona str. SL483 plasmid unnamed, complete sequence
Erwinia_amylovora_Ea367	GCA_012367305.1	IMGVR_UViG_3300031420_000044
Erwinia_amylovora_Ea367	GCA_012367305.1	NC_005814.1 Yersinia pestis biovar Microtus str. 91001 plasmid pCRY, complete sequence
Erwinia_amylovora_Ea367	GCA_012367305.1	NZ_JAAEWB010000012.1 Erwinia amylovora strain Ea12 plasmid pEU30, whole genome shotgun sequence
Erwinia_amylovora_Ea367	GCA_012367305.1	NZ_JAAEWR010000012.1 Erwinia amylovora strain 39-I-II plasmid pEA72, whole genome shotgun sequence
Erwinia_amylovora_Ea367	GCA_012367305.1	NZ_JAAEWH010000049.1 Erwinia amylovora strain Ea01-03 plasmid pEU30, whole genome shotgun sequence
Erwinia_amylovora_Ea367	GCA_012367305.1	NZ_CP028352.1 Pantoea vagans strain PV989 plasmid pPV989-94, complete sequence
Erwinia_amylovora_Ea367	GCA_012367305.1	NZ_CP030267.1 Klebsiella pneumoniae subsp. pneumoniae strain SC-7 plasmid pSC7-KPC, complete sequence
Erwinia_amylovora_Ea367	GCA_012367305.1	CU468130.1 Erwinia tasmaniensis strain ET1/99 complete plasmid pET35
Erwinia_amylovora_Ea367	GCA_012367305.1	NZ_CP030267.1 Klebsiella pneumoniae subsp. pneumoniae strain SC-7 plasmid pSC7-KPC, complete sequence
Erwinia_amylovora_Ea367	GCA_012367305.1	NZ_JAAEWH010000068.1 Erwinia amylovora strain Ea01-03 plasmid pEA4.0, whole genome shotgun sequence
Erwinia_amylovora_Ea367	GCA_012367305.1	KJ685892.1 Salmonella enterica subsp. enterica serovar Hadar strain 139.67 plasmid KVHS-004 plasmid mediated quinolone resistance protein (qnrD1) and regulator protein (rop) genes, complete cds
Erwinia_amylovora_Ea367	GCA_012367305.1	CU468130.1 Erwinia tasmaniensis strain ET1/99 complete plasmid pET35
Erwinia_amylovora_Ea367	GCA_012367305.1	CU468130.1 Erwinia tasmaniensis strain ET1/99 complete plasmid pET35
Erwinia_amylovora_Ea367	GCA_012367305.1	NZ_CP030267.1 Klebsiella pneumoniae subsp. pneumoniae strain SC-7 plasmid pSC7-KPC, complete sequence
Erwinia_amylovora_Ea367	GCA_012367305.1	BK049330.1 TPA_asm: Myoviridae sp. isolate ct8vj1, partial genome
Erwinia_amylovora_Ea3_97	GCA_012367325.1	IMGVR_UViG_3300031416_000056
Erwinia_amylovora_Ea3_97	GCA_012367325.1	IMGVR_UViG_3300031134_000061
Erwinia_amylovora_Ea3_97	GCA_012367325.1	IMGVR_UViG_3300031372_000008
Erwinia_amylovora_Ea3_97	GCA_012367325.1	FQ482085.1 Erwinia tasmaniensis phage phiEt88 complete genome
Erwinia_amylovora_Ea3_97	GCA_012367325.1	FQ482085.1 Erwinia tasmaniensis phage phiEt88 complete genome
Erwinia_amylovora_Ea3_97	GCA_012367325.1	IMGVR_UViG_3300027807_000005
Erwinia_amylovora_Ea3_97	GCA_012367325.1	NZ_JAAEWH010000049.1 Erwinia amylovora strain Ea01-03 plasmid pEU30, whole genome shotgun sequence
Erwinia_amylovora_Ea3_97	GCA_012367325.1	NZ_HG813238.1 Erwinia amylovora strain 692 plasmid II, complete sequence
Erwinia_amylovora_Ea315_1	GCA_012367355.1	BK049330.1 TPA_asm: Myoviridae sp. isolate ct8vj1, partial genome
Erwinia_amylovora_Ea315_1	GCA_012367355.1	NZ_CP030267.1 Klebsiella pneumoniae subsp. pneumoniae strain SC-7 plasmid pSC7-KPC, complete sequence
Erwinia_amylovora_Ea315_1	GCA_012367355.1	NZ_JAAEWH010000049.1 Erwinia amylovora strain Ea01-03 plasmid pEU30, whole genome shotgun sequence
Erwinia_amylovora_Ea315_1	GCA_012367355.1	NZ_JAAEWR010000012.1 Erwinia amylovora strain 39-I-II plasmid pEA72, whole genome shotgun sequence
Erwinia_amylovora_Ea315_1	GCA_012367355.1	CU468130.1 Erwinia tasmaniensis strain ET1/99 complete plasmid pET35
Erwinia_amylovora_Ea315_1	GCA_012367355.1	NZ_CP030267.1 Klebsiella pneumoniae subsp. pneumoniae strain SC-7 plasmid pSC7-KPC, complete sequence
Erwinia_amylovora_Ea315_1	GCA_012367355.1	NZ_CP028352.1 Pantoea vagans strain PV989 plasmid pPV989-94, complete sequence
Erwinia_amylovora_Ea315_1	GCA_012367355.1	NZ_JAAEWH010000068.1 Erwinia amylovora strain Ea01-03 plasmid pEA4.0, whole genome shotgun sequence
Erwinia_amylovora_Ea315_1	GCA_012367355.1	NZ_CP030267.1 Klebsiella pneumoniae subsp. pneumoniae strain SC-7 plasmid pSC7-KPC, complete sequence
Erwinia_amylovora_Ea315_1	GCA_012367355.1	CU468130.1 Erwinia tasmaniensis strain ET1/99 complete plasmid pET35
Erwinia_amylovora_Ea315_1	GCA_012367355.1	CU468130.1 Erwinia tasmaniensis strain ET1/99 complete plasmid pET35
Erwinia_amylovora_Ea315_1	GCA_012367355.1	NZ_JAAEWB010000012.1 Erwinia amylovora strain Ea12 plasmid pEU30, whole genome shotgun sequence
Erwinia_amylovora_Ea315_1	GCA_012367355.1	NC_011148.1 Salmonella enterica subsp. enterica serovar Agona str. SL483 plasmid unnamed, complete sequence
Erwinia_amylovora_Ea315_1	GCA_012367355.1	KJ685892.1 Salmonella enterica subsp. enterica serovar Hadar strain 139.67 plasmid KVHS-004 plasmid mediated quinolone resistance protein (qnrD1) and regulator protein (rop) genes, complete cds
Erwinia_amylovora_Ea315_1	GCA_012367355.1	IMGVR_UViG_3300031420_000044
Erwinia_amylovora_Ea315_1	GCA_012367355.1	FQ482085.1 Erwinia tasmaniensis phage phiEt88 complete genome
Erwinia_amylovora_Ea315_1	GCA_012367355.1	NC_005814.1 Yersinia pestis biovar Microtus str. 91001 plasmid pCRY, complete sequence
Erwinia_amylovora_Ea2_97	GCA_012367365.1	IMGVR_UViG_3300031372_000008
Erwinia_amylovora_Ea2_97	GCA_012367365.1	NZ_HG813238.1 Erwinia amylovora strain 692 plasmid II, complete sequence
Erwinia_amylovora_Ea2_97	GCA_012367365.1	NZ_JAAEWH010000049.1 Erwinia amylovora strain Ea01-03 plasmid pEU30, whole genome shotgun sequence
Erwinia_amylovora_Ea2_97	GCA_012367365.1	IMGVR_UViG_3300031416_000056
Erwinia_amylovora_Ea2_97	GCA_012367365.1	IMGVR_UViG_3300027807_000005
Erwinia_amylovora_Ea2_97	GCA_012367365.1	FQ482085.1 Erwinia tasmaniensis phage phiEt88 complete genome
Erwinia_amylovora_Ea2_97	GCA_012367365.1	FQ482085.1 Erwinia tasmaniensis phage phiEt88 complete genome
Erwinia_amylovora_Ea2_97	GCA_012367365.1	IMGVR_UViG_3300031134_000061
Erwinia_amylovora_Ea29_7	GCA_012367375.1	NZ_CP030267.1 Klebsiella pneumoniae subsp. pneumoniae strain SC-7 plasmid pSC7-KPC, complete sequence
Erwinia_amylovora_Ea29_7	GCA_012367375.1	NZ_JAAEWH010000049.1 Erwinia amylovora strain Ea01-03 plasmid pEU30, whole genome shotgun sequence
Erwinia_amylovora_Ea29_7	GCA_012367375.1	CU468130.1 Erwinia tasmaniensis strain ET1/99 complete plasmid pET35
Erwinia_amylovora_Ea29_7	GCA_012367375.1	IMGVR_UViG_3300031420_000044
Erwinia_amylovora_Ea29_7	GCA_012367375.1	FQ482085.1 Erwinia tasmaniensis phage phiEt88 complete genome
Erwinia_amylovora_Ea29_7	GCA_012367375.1	NZ_JAAEWR010000012.1 Erwinia amylovora strain 39-I-II plasmid pEA72, whole genome shotgun sequence
Erwinia_amylovora_Ea29_7	GCA_012367375.1	NC_011148.1 Salmonella enterica subsp. enterica serovar Agona str. SL483 plasmid unnamed, complete sequence
Erwinia_amylovora_Ea29_7	GCA_012367375.1	CU468130.1 Erwinia tasmaniensis strain ET1/99 complete plasmid pET35
Erwinia_amylovora_Ea29_7	GCA_012367375.1	NZ_JAAEWB010000012.1 Erwinia amylovora strain Ea12 plasmid pEU30, whole genome shotgun sequence
Erwinia_amylovora_Ea29_7	GCA_012367375.1	NZ_JAAEWH010000068.1 Erwinia amylovora strain Ea01-03 plasmid pEA4.0, whole genome shotgun sequence
Erwinia_amylovora_Ea29_7	GCA_012367375.1	NZ_CP030267.1 Klebsiella pneumoniae subsp. pneumoniae strain SC-7 plasmid pSC7-KPC, complete sequence
Erwinia_amylovora_Ea29_7	GCA_012367375.1	KJ685892.1 Salmonella enterica subsp. enterica serovar Hadar strain 139.67 plasmid KVHS-004 plasmid mediated quinolone resistance protein (qnrD1) and regulator protein (rop) genes, complete cds
Erwinia_amylovora_Ea29_7	GCA_012367375.1	NZ_CP030267.1 Klebsiella pneumoniae subsp. pneumoniae strain SC-7 plasmid pSC7-KPC, complete sequence
Erwinia_amylovora_Ea2_95	GCA_012367415.1	CU468130.1 Erwinia tasmaniensis strain ET1/99 complete plasmid pET35
Erwinia_amylovora_Ea2_95	GCA_012367415.1	CU468130.1 Erwinia tasmaniensis strain ET1/99 complete plasmid pET35
Erwinia_amylovora_Ea2_95	GCA_012367415.1	FQ482085.1 Erwinia tasmaniensis phage phiEt88 complete genome
Erwinia_amylovora_Ea2_95	GCA_012367415.1	CU468130.1 Erwinia tasmaniensis strain ET1/99 complete plasmid pET35
Erwinia_amylovora_Ea2_95	GCA_012367415.1	IMGVR_UViG_3300031416_000083
Erwinia_amylovora_Ea2_95	GCA_012367415.1	NZ_JACWHM010000027.1 Klebsiella pneumoniae strain BA9984 map unlocalized plasmid pIncN2 27, whole genome shotgun sequence
Erwinia_amylovora_Ea2_95	GCA_012367415.1	CP013971.1 Erwinia tracheiphila strain MDcuke plasmid unnamed1, complete sequence
Erwinia_amylovora_Ea2_95	GCA_012367415.1	CU468130.1 Erwinia tasmaniensis strain ET1/99 complete plasmid pET35
Erwinia_amylovora_Ea1_98	GCA_012367425.1	NZ_JACWHM010000027.1 Klebsiella pneumoniae strain BA9984 map unlocalized plasmid pIncN2 27, whole genome shotgun sequence
Erwinia_amylovora_Ea1_98	GCA_012367425.1	CP013971.1 Erwinia tracheiphila strain MDcuke plasmid unnamed1, complete sequence
Erwinia_amylovora_Ea1_98	GCA_012367425.1	FQ482085.1 Erwinia tasmaniensis phage phiEt88 complete genome
Erwinia_amylovora_Ea1_98	GCA_012367425.1	FQ482085.1 Erwinia tasmaniensis phage phiEt88 complete genome
Erwinia_amylovora_Ea1_98	GCA_012367425.1	CP002126.1 Erwinia sp. Ejp617 plasmid pJE02, complete sequence
Erwinia_amylovora_Ea1_98	GCA_012367425.1	NZ_QHMI01000031.1 Enterobacter hormaechei strain PECIMP map unlocalized plasmid punnamed2 NODE_31_length_40047_cov_12.1539_pilon_IMP, whole genome shotgun sequence
Erwinia_amylovora_Ea1_98	GCA_012367425.1	FQ482085.1 Erwinia tasmaniensis phage phiEt88 complete genome
Erwinia_amylovora_Ea1_98	GCA_012367425.1	IMGVR_UViG_651324086_000002
Erwinia_amylovora_Ea1_98	GCA_012367425.1	IMGVR_UViG_3300028586_000174
Erwinia_amylovora_Ea1_97	GCA_012367455.1	IMGVR_UViG_3300027807_000005
Erwinia_amylovora_Ea1_97	GCA_012367455.1	NZ_HG813238.1 Erwinia amylovora strain 692 plasmid II, complete sequence
Erwinia_amylovora_Ea1_97	GCA_012367455.1	IMGVR_UViG_3300031416_000056
Erwinia_amylovora_Ea1_97	GCA_012367455.1	FQ482085.1 Erwinia tasmaniensis phage phiEt88 complete genome
Erwinia_amylovora_Ea1_97	GCA_012367455.1	FQ482085.1 Erwinia tasmaniensis phage phiEt88 complete genome
Erwinia_amylovora_Ea1_97	GCA_012367455.1	IMGVR_UViG_3300031372_000008
Erwinia_amylovora_Ea1_97	GCA_012367455.1	FQ482085.1 Erwinia tasmaniensis phage phiEt88 complete genome
Erwinia_amylovora_Ea1_97	GCA_012367455.1	IMGVR_UViG_3300031087_000026
Erwinia_amylovora_Ea1_97	GCA_012367455.1	NZ_JAAEWH010000049.1 Erwinia amylovora strain Ea01-03 plasmid pEU30, whole genome shotgun sequence
Erwinia_amylovora_Ea1_97	GCA_012367455.1	IMGVR_UViG_3300031134_000061
Erwinia_amylovora_Ea1_97	GCA_012367455.1	IMGVR_UViG_3300031418_000021
Erwinia_amylovora_Ea1_97	GCA_012367455.1	BK057436.1 TPA_asm: Myoviridae sp. isolate ctGdI15, partial genome
Erwinia_amylovora_Ea1_97	GCA_012367455.1	BK057436.1 TPA_asm: Myoviridae sp. isolate ctGdI15, partial genome
Erwinia_amylovora_Ea1_95	GCA_012367475.1	FQ482085.1 Erwinia tasmaniensis phage phiEt88 complete genome
Erwinia_amylovora_Ea1_95	GCA_012367475.1	IMGVR_UViG_3300031418_000160
Erwinia_amylovora_Ea1_95	GCA_012367475.1	NZ_JAAEWH010000049.1 Erwinia amylovora strain Ea01-03 plasmid pEU30, whole genome shotgun sequence
Erwinia_amylovora_Ea1_95	GCA_012367475.1	NZ_HG813238.1 Erwinia amylovora strain 692 plasmid II, complete sequence
Erwinia_amylovora_Ea1_95	GCA_012367475.1	IMGVR_UViG_3300031418_000114
Erwinia_amylovora_Ea1_95	GCA_012367475.1	NZ_CP030267.1 Klebsiella pneumoniae subsp. pneumoniae strain SC-7 plasmid pSC7-KPC, complete sequence
Erwinia_amylovora_Ea1_95	GCA_012367475.1	FQ482085.1 Erwinia tasmaniensis phage phiEt88 complete genome
Erwinia_amylovora_Ea1_95	GCA_012367475.1	IMGVR_UViG_3300031087_000026
Erwinia_amylovora_Ea1_95	GCA_012367475.1	IMGVR_UViG_3300031134_000061
Erwinia_amylovora_Ea1_95	GCA_012367475.1	NZ_JAAEWR010000012.1 Erwinia amylovora strain 39-I-II plasmid pEA72, whole genome shotgun sequence
Erwinia_amylovora_Ea1_95	GCA_012367475.1	IMGVR_UViG_651324086_000002
Erwinia_amylovora_Ea169	GCA_012367485.1	CU468130.1 Erwinia tasmaniensis strain ET1/99 complete plasmid pET35
Erwinia_amylovora_Ea169	GCA_012367485.1	NZ_JAAEWR010000012.1 Erwinia amylovora strain 39-I-II plasmid pEA72, whole genome shotgun sequence
Erwinia_amylovora_Ea169	GCA_012367485.1	KJ685892.1 Salmonella enterica subsp. enterica serovar Hadar strain 139.67 plasmid KVHS-004 plasmid mediated quinolone resistance protein (qnrD1) and regulator protein (rop) genes, complete cds
Erwinia_amylovora_Ea169	GCA_012367485.1	NC_005814.1 Yersinia pestis biovar Microtus str. 91001 plasmid pCRY, complete sequence
Erwinia_amylovora_Ea169	GCA_012367485.1	CU468130.1 Erwinia tasmaniensis strain ET1/99 complete plasmid pET35
Erwinia_amylovora_Ea169	GCA_012367485.1	BK049330.1 TPA_asm: Myoviridae sp. isolate ct8vj1, partial genome
Erwinia_amylovora_Ea169	GCA_012367485.1	NZ_CP030267.1 Klebsiella pneumoniae subsp. pneumoniae strain SC-7 plasmid pSC7-KPC, complete sequence
Erwinia_amylovora_Ea169	GCA_012367485.1	NZ_CP030267.1 Klebsiella pneumoniae subsp. pneumoniae strain SC-7 plasmid pSC7-KPC, complete sequence
Erwinia_amylovora_Ea169	GCA_012367485.1	NZ_JAAEWH010000068.1 Erwinia amylovora strain Ea01-03 plasmid pEA4.0, whole genome shotgun sequence
Erwinia_amylovora_Ea169	GCA_012367485.1	NZ_JAAEWH010000049.1 Erwinia amylovora strain Ea01-03 plasmid pEU30, whole genome shotgun sequence
Erwinia_amylovora_Ea169	GCA_012367485.1	NZ_CP030267.1 Klebsiella pneumoniae subsp. pneumoniae strain SC-7 plasmid pSC7-KPC, complete sequence
Erwinia_amylovora_Ea169	GCA_012367485.1	NZ_JAAEWB010000012.1 Erwinia amylovora strain Ea12 plasmid pEU30, whole genome shotgun sequence
Erwinia_amylovora_Ea169	GCA_012367485.1	IMGVR_UViG_3300031420_000044
Erwinia_amylovora_Ea169	GCA_012367485.1	FQ482085.1 Erwinia tasmaniensis phage phiEt88 complete genome
Erwinia_amylovora_Ea169	GCA_012367485.1	NC_011148.1 Salmonella enterica subsp. enterica serovar Agona str. SL483 plasmid unnamed, complete sequence
Erwinia_amylovora_Ea169	GCA_012367485.1	NZ_CP028352.1 Pantoea vagans strain PV989 plasmid pPV989-94, complete sequence
Erwinia_amylovora_Ea160_3_51	GCA_012367495.1	NZ_JAAEWB010000012.1 Erwinia amylovora strain Ea12 plasmid pEU30, whole genome shotgun sequence
Erwinia_amylovora_Ea160_3_51	GCA_012367495.1	CU468130.1 Erwinia tasmaniensis strain ET1/99 complete plasmid pET35
Erwinia_amylovora_Ea160_3_51	GCA_012367495.1	NZ_CP030267.1 Klebsiella pneumoniae subsp. pneumoniae strain SC-7 plasmid pSC7-KPC, complete sequence
Erwinia_amylovora_Ea160_3_51	GCA_012367495.1	NZ_JAAEWB010000012.1 Erwinia amylovora strain Ea12 plasmid pEU30, whole genome shotgun sequence
Erwinia_amylovora_Ea160_3_51	GCA_012367495.1	NZ_JAAEWH010000049.1 Erwinia amylovora strain Ea01-03 plasmid pEU30, whole genome shotgun sequence
Erwinia_amylovora_Ea160_3_51	GCA_012367495.1	NZ_JAAEWB010000012.1 Erwinia amylovora strain Ea12 plasmid pEU30, whole genome shotgun sequence
Erwinia_amylovora_Ea160_3_51	GCA_012367495.1	NZ_JAAEWB010000012.1 Erwinia amylovora strain Ea12 plasmid pEU30, whole genome shotgun sequence
Erwinia_amylovora_Ea160_3_51	GCA_012367495.1	NZ_RRGT01000084.1 Escherichia coli strain FWSEC0128 map unlocalized plasmid unnamed2 FWSEC0128_contig00036, whole genome shotgun sequence
Erwinia_amylovora_Ea160_3_51	GCA_012367495.1	AJJI01000025.1 Klebsiella pneumoniae subsp. pneumoniae DSM 30104 = JCM 1662 = NBRC 14940 strain DSM 30104 plasmid pKPt3 Contig00025, whole genome shotgun sequence
Erwinia_amylovora_Ea160_3_51	GCA_012367495.1	NZ_JAAEWB010000012.1 Erwinia amylovora strain Ea12 plasmid pEU30, whole genome shotgun sequence
Erwinia_amylovora_Ea160_3_51	GCA_012367495.1	NZ_JAAEWB010000012.1 Erwinia amylovora strain Ea12 plasmid pEU30, whole genome shotgun sequence
Erwinia_amylovora_Ea160_3_51	GCA_012367495.1	NZ_JAAEWB010000012.1 Erwinia amylovora strain Ea12 plasmid pEU30, whole genome shotgun sequence
Erwinia_amylovora_Ea160_3_51	GCA_012367495.1	NZ_CP028352.1 Pantoea vagans strain PV989 plasmid pPV989-94, complete sequence
Erwinia_amylovora_Ea160_3_51	GCA_012367495.1	BK049330.1 TPA_asm: Myoviridae sp. isolate ct8vj1, partial genome
Erwinia_amylovora_Ea160_3_51	GCA_012367495.1	NZ_JAAEWB010000012.1 Erwinia amylovora strain Ea12 plasmid pEU30, whole genome shotgun sequence
Erwinia_amylovora_Ea160_3_51	GCA_012367495.1	NZ_JAAEWB010000012.1 Erwinia amylovora strain Ea12 plasmid pEU30, whole genome shotgun sequence
Erwinia_amylovora_Ea160_3_51	GCA_012367495.1	NZ_JAAEWB010000012.1 Erwinia amylovora strain Ea12 plasmid pEU30, whole genome shotgun sequence
Erwinia_amylovora_Ea160_3_51	GCA_012367495.1	NZ_JAAEWH010000049.1 Erwinia amylovora strain Ea01-03 plasmid pEU30, whole genome shotgun sequence
Erwinia_amylovora_Ea160_3_51	GCA_012367495.1	NZ_JAAEWB010000012.1 Erwinia amylovora strain Ea12 plasmid pEU30, whole genome shotgun sequence
Erwinia_amylovora_Ea160_3_51	GCA_012367495.1	NZ_JAAEWB010000012.1 Erwinia amylovora strain Ea12 plasmid pEU30, whole genome shotgun sequence
Erwinia_amylovora_Ea160_3_51	GCA_012367495.1	NZ_JAAEWH010000049.1 Erwinia amylovora strain Ea01-03 plasmid pEU30, whole genome shotgun sequence
Erwinia_amylovora_Ea160_3_51	GCA_012367495.1	NZ_CP030267.1 Klebsiella pneumoniae subsp. pneumoniae strain SC-7 plasmid pSC7-KPC, complete sequence
Erwinia_amylovora_Ea160_3_51	GCA_012367495.1	NZ_CP030267.1 Klebsiella pneumoniae subsp. pneumoniae strain SC-7 plasmid pSC7-KPC, complete sequence
Erwinia_amylovora_Ea160_3_51	GCA_012367495.1	KJ685892.1 Salmonella enterica subsp. enterica serovar Hadar strain 139.67 plasmid KVHS-004 plasmid mediated quinolone resistance protein (qnrD1) and regulator protein (rop) genes, complete cds
Erwinia_amylovora_Ea160_3_51	GCA_012367495.1	NZ_JAAEWH010000049.1 Erwinia amylovora strain Ea01-03 plasmid pEU30, whole genome shotgun sequence
Erwinia_amylovora_Ea160_3_51	GCA_012367495.1	NZ_JAAEWB010000012.1 Erwinia amylovora strain Ea12 plasmid pEU30, whole genome shotgun sequence
Erwinia_amylovora_Ea160_3_51	GCA_012367495.1	FQ482085.1 Erwinia tasmaniensis phage phiEt88 complete genome
Erwinia_amylovora_Ea160_3_51	GCA_012367495.1	NZ_CP030267.1 Klebsiella pneumoniae subsp. pneumoniae strain SC-7 plasmid pSC7-KPC, complete sequence
Erwinia_amylovora_Ea160_3_51	GCA_012367495.1	IMGVR_UViG_3300031151_000085
Erwinia_amylovora_Ea160_3_51	GCA_012367495.1	NZ_JAAEWH010000049.1 Erwinia amylovora strain Ea01-03 plasmid pEU30, whole genome shotgun sequence
Erwinia_amylovora_Ea160_3_51	GCA_012367495.1	NC_005814.1 Yersinia pestis biovar Microtus str. 91001 plasmid pCRY, complete sequence
Erwinia_amylovora_Ea160_3_51	GCA_012367495.1	NZ_JAAEWH010000049.1 Erwinia amylovora strain Ea01-03 plasmid pEU30, whole genome shotgun sequence
Erwinia_amylovora_Ea160_3_51	GCA_012367495.1	NZ_JAAEWB010000012.1 Erwinia amylovora strain Ea12 plasmid pEU30, whole genome shotgun sequence
Erwinia_amylovora_Ea160_3_51	GCA_012367495.1	NZ_JAAEWB010000012.1 Erwinia amylovora strain Ea12 plasmid pEU30, whole genome shotgun sequence
Erwinia_amylovora_Ea160_3_51	GCA_012367495.1	NZ_JAAEWH010000049.1 Erwinia amylovora strain Ea01-03 plasmid pEU30, whole genome shotgun sequence
Erwinia_amylovora_Ea160_3_51	GCA_012367495.1	DTR_651038
Erwinia_amylovora_Ea160_3_51	GCA_012367495.1	NZ_JAAEWB010000012.1 Erwinia amylovora strain Ea12 plasmid pEU30, whole genome shotgun sequence
Erwinia_amylovora_Ea160_3_51	GCA_012367495.1	NZ_JAAEWH010000049.1 Erwinia amylovora strain Ea01-03 plasmid pEU30, whole genome shotgun sequence
Erwinia_amylovora_Ea160_3_51	GCA_012367495.1	NZ_JAAEWR010000012.1 Erwinia amylovora strain 39-I-II plasmid pEA72, whole genome shotgun sequence
Erwinia_amylovora_Ea160_3_51	GCA_012367495.1	NZ_JAAEWB010000012.1 Erwinia amylovora strain Ea12 plasmid pEU30, whole genome shotgun sequence
Erwinia_amylovora_Ea160_3_51	GCA_012367495.1	NZ_JAAEWH010000049.1 Erwinia amylovora strain Ea01-03 plasmid pEU30, whole genome shotgun sequence
Erwinia_amylovora_Ea160_3_51	GCA_012367495.1	NZ_JAAEWB010000012.1 Erwinia amylovora strain Ea12 plasmid pEU30, whole genome shotgun sequence
Erwinia_amylovora_Ea160_3_51	GCA_012367495.1	NZ_JAAEWB010000012.1 Erwinia amylovora strain Ea12 plasmid pEU30, whole genome shotgun sequence
Erwinia_amylovora_Ea160_3_51	GCA_012367495.1	NZ_JAAEWB010000012.1 Erwinia amylovora strain Ea12 plasmid pEU30, whole genome shotgun sequence
Erwinia_amylovora_Ea160_3_51	GCA_012367495.1	NZ_JAAEWB010000012.1 Erwinia amylovora strain Ea12 plasmid pEU30, whole genome shotgun sequence
Erwinia_amylovora_Ea160_3_51	GCA_012367495.1	NZ_CP054046.1 Yersinia massiliensis strain 2011N-4075 plasmid unnamed1, complete sequence
Erwinia_amylovora_Ea160_3_51	GCA_012367495.1	NZ_JAAEWB010000012.1 Erwinia amylovora strain Ea12 plasmid pEU30, whole genome shotgun sequence
Erwinia_amylovora_Ea160_3_51	GCA_012367495.1	NZ_JAAEWB010000012.1 Erwinia amylovora strain Ea12 plasmid pEU30, whole genome shotgun sequence
Erwinia_amylovora_Ea160_3_51	GCA_012367495.1	NZ_JAAEWB010000012.1 Erwinia amylovora strain Ea12 plasmid pEU30, whole genome shotgun sequence
Erwinia_amylovora_Ea160_3_51	GCA_012367495.1	NZ_JAAEWB010000012.1 Erwinia amylovora strain Ea12 plasmid pEU30, whole genome shotgun sequence
Erwinia_amylovora_Ea160_3_51	GCA_012367495.1	CU468130.1 Erwinia tasmaniensis strain ET1/99 complete plasmid pET35
Erwinia_amylovora_Ea160_3_51	GCA_012367495.1	NZ_CP030267.1 Klebsiella pneumoniae subsp. pneumoniae strain SC-7 plasmid pSC7-KPC, complete sequence
Erwinia_amylovora_Ea160_3_51	GCA_012367495.1	NZ_JAAEWH010000049.1 Erwinia amylovora strain Ea01-03 plasmid pEU30, whole genome shotgun sequence
Erwinia_amylovora_Ea123_5_51	GCA_012367535.1	CP002126.1 Erwinia sp. Ejp617 plasmid pJE02, complete sequence
Erwinia_amylovora_Ea123_5_51	GCA_012367535.1	CU468130.1 Erwinia tasmaniensis strain ET1/99 complete plasmid pET35
Erwinia_amylovora_Ea123_5_51	GCA_012367535.1	NZ_CP030267.1 Klebsiella pneumoniae subsp. pneumoniae strain SC-7 plasmid pSC7-KPC, complete sequence
Erwinia_amylovora_Ea123_5_51	GCA_012367535.1	FQ482085.1 Erwinia tasmaniensis phage phiEt88 complete genome
Erwinia_amylovora_Ea123_5_51	GCA_012367535.1	NZ_JAAEWH010000068.1 Erwinia amylovora strain Ea01-03 plasmid pEA4.0, whole genome shotgun sequence
Erwinia_amylovora_Ea123_5_51	GCA_012367535.1	NZ_JAAEWB010000012.1 Erwinia amylovora strain Ea12 plasmid pEU30, whole genome shotgun sequence
Erwinia_amylovora_Ea123_5_51	GCA_012367535.1	NZ_JAAEWB010000012.1 Erwinia amylovora strain Ea12 plasmid pEU30, whole genome shotgun sequence
Erwinia_amylovora_Ea12	GCA_012367545.1	CU468130.1 Erwinia tasmaniensis strain ET1/99 complete plasmid pET35
Erwinia_amylovora_Ea12	GCA_012367545.1	FQ482085.1 Erwinia tasmaniensis phage phiEt88 complete genome
Erwinia_amylovora_Ea12	GCA_012367545.1	IMGVR_UViG_3300031151_000085
Erwinia_amylovora_Ea12	GCA_012367545.1	AJJI01000025.1 Klebsiella pneumoniae subsp. pneumoniae DSM 30104 = JCM 1662 = NBRC 14940 strain DSM 30104 plasmid pKPt3 Contig00025, whole genome shotgun sequence
Erwinia_amylovora_Ea12	GCA_012367545.1	NZ_JAAEWR010000012.1 Erwinia amylovora strain 39-I-II plasmid pEA72, whole genome shotgun sequence
Erwinia_amylovora_Ea12	GCA_012367545.1	NZ_JAAEWH010000049.1 Erwinia amylovora strain Ea01-03 plasmid pEU30, whole genome shotgun sequence
Erwinia_amylovora_Ea12	GCA_012367545.1	NZ_JAAEWB010000012.1 Erwinia amylovora strain Ea12 plasmid pEU30, whole genome shotgun sequence
Erwinia_amylovora_Ea12	GCA_012367545.1	NZ_JAAEWB010000012.1 Erwinia amylovora strain Ea12 plasmid pEU30, whole genome shotgun sequence
Erwinia_amylovora_Ea12	GCA_012367545.1	BK049330.1 TPA_asm: Myoviridae sp. isolate ct8vj1, partial genome
Erwinia_amylovora_Ea12	GCA_012367545.1	NZ_JAAEWB010000012.1 Erwinia amylovora strain Ea12 plasmid pEU30, whole genome shotgun sequence
Erwinia_amylovora_Ea12	GCA_012367545.1	NZ_JAAEWB010000012.1 Erwinia amylovora strain Ea12 plasmid pEU30, whole genome shotgun sequence
Erwinia_amylovora_Ea12	GCA_012367545.1	NZ_JAAEWH010000049.1 Erwinia amylovora strain Ea01-03 plasmid pEU30, whole genome shotgun sequence
Erwinia_amylovora_Ea12	GCA_012367545.1	IMGVR_UViG_3300031420_000044
Erwinia_amylovora_Ea12	GCA_012367545.1	NZ_JAAEWH010000049.1 Erwinia amylovora strain Ea01-03 plasmid pEU30, whole genome shotgun sequence
Erwinia_amylovora_Ea12	GCA_012367545.1	NZ_JAAEWB010000012.1 Erwinia amylovora strain Ea12 plasmid pEU30, whole genome shotgun sequence
Erwinia_amylovora_Ea12	GCA_012367545.1	NZ_JAAEWH010000049.1 Erwinia amylovora strain Ea01-03 plasmid pEU30, whole genome shotgun sequence
Erwinia_amylovora_Ea12	GCA_012367545.1	NZ_CP030267.1 Klebsiella pneumoniae subsp. pneumoniae strain SC-7 plasmid pSC7-KPC, complete sequence
Erwinia_amylovora_Ea12	GCA_012367545.1	NC_005814.1 Yersinia pestis biovar Microtus str. 91001 plasmid pCRY, complete sequence
Erwinia_amylovora_Ea12	GCA_012367545.1	NZ_JAAEWB010000012.1 Erwinia amylovora strain Ea12 plasmid pEU30, whole genome shotgun sequence
Erwinia_amylovora_Ea12	GCA_012367545.1	NZ_JAAEWB010000012.1 Erwinia amylovora strain Ea12 plasmid pEU30, whole genome shotgun sequence
Erwinia_amylovora_Ea12	GCA_012367545.1	NZ_JAAEWH010000049.1 Erwinia amylovora strain Ea01-03 plasmid pEU30, whole genome shotgun sequence
Erwinia_amylovora_Ea12	GCA_012367545.1	NZ_JAAEWB010000012.1 Erwinia amylovora strain Ea12 plasmid pEU30, whole genome shotgun sequence
Erwinia_amylovora_Ea12	GCA_012367545.1	NZ_CP030267.1 Klebsiella pneumoniae subsp. pneumoniae strain SC-7 plasmid pSC7-KPC, complete sequence
Erwinia_amylovora_Ea12	GCA_012367545.1	NZ_JAAEWH010000049.1 Erwinia amylovora strain Ea01-03 plasmid pEU30, whole genome shotgun sequence
Erwinia_amylovora_Ea12	GCA_012367545.1	NZ_CP030267.1 Klebsiella pneumoniae subsp. pneumoniae strain SC-7 plasmid pSC7-KPC, complete sequence
Erwinia_amylovora_Ea12	GCA_012367545.1	NZ_CP028352.1 Pantoea vagans strain PV989 plasmid pPV989-94, complete sequence
Erwinia_amylovora_Ea12	GCA_012367545.1	NZ_JAAEWH010000049.1 Erwinia amylovora strain Ea01-03 plasmid pEU30, whole genome shotgun sequence
Erwinia_amylovora_Ea12	GCA_012367545.1	NZ_JAAEWH010000049.1 Erwinia amylovora strain Ea01-03 plasmid pEU30, whole genome shotgun sequence
Erwinia_amylovora_Ea12	GCA_012367545.1	NZ_JAAEWH010000068.1 Erwinia amylovora strain Ea01-03 plasmid pEA4.0, whole genome shotgun sequence
Erwinia_amylovora_Ea12	GCA_012367545.1	NZ_CP030267.1 Klebsiella pneumoniae subsp. pneumoniae strain SC-7 plasmid pSC7-KPC, complete sequence
Erwinia_amylovora_Ea12	GCA_012367545.1	NZ_JAAEWB010000012.1 Erwinia amylovora strain Ea12 plasmid pEU30, whole genome shotgun sequence
Erwinia_amylovora_Ea12	GCA_012367545.1	NZ_RRGT01000084.1 Escherichia coli strain FWSEC0128 map unlocalized plasmid unnamed2 FWSEC0128_contig00036, whole genome shotgun sequence
Erwinia_amylovora_Ea12	GCA_012367545.1	NZ_JAAEWB010000012.1 Erwinia amylovora strain Ea12 plasmid pEU30, whole genome shotgun sequence
Erwinia_amylovora_Ea12	GCA_012367545.1	NZ_JAAEWB010000012.1 Erwinia amylovora strain Ea12 plasmid pEU30, whole genome shotgun sequence
Erwinia_amylovora_Ea12	GCA_012367545.1	DTR_651038
Erwinia_amylovora_Ea12	GCA_012367545.1	NZ_JAAEWB010000012.1 Erwinia amylovora strain Ea12 plasmid pEU30, whole genome shotgun sequence
Erwinia_amylovora_Ea12	GCA_012367545.1	KJ685892.1 Salmonella enterica subsp. enterica serovar Hadar strain 139.67 plasmid KVHS-004 plasmid mediated quinolone resistance protein (qnrD1) and regulator protein (rop) genes, complete cds
Erwinia_amylovora_Ea12	GCA_012367545.1	NZ_JAAEWB010000012.1 Erwinia amylovora strain Ea12 plasmid pEU30, whole genome shotgun sequence
Erwinia_amylovora_Ea12	GCA_012367545.1	CU468130.1 Erwinia tasmaniensis strain ET1/99 complete plasmid pET35
Erwinia_amylovora_Ea12	GCA_012367545.1	NZ_CP030267.1 Klebsiella pneumoniae subsp. pneumoniae strain SC-7 plasmid pSC7-KPC, complete sequence
Erwinia_amylovora_Ea116_5_29	GCA_012367575.1	NZ_JAAEWH010000049.1 Erwinia amylovora strain Ea01-03 plasmid pEU30, whole genome shotgun sequence
Erwinia_amylovora_Ea116_5_29	GCA_012367575.1	NZ_JAAEWR010000012.1 Erwinia amylovora strain 39-I-II plasmid pEA72, whole genome shotgun sequence
Erwinia_amylovora_Ea116_5_29	GCA_012367575.1	NZ_JAAEWH010000068.1 Erwinia amylovora strain Ea01-03 plasmid pEA4.0, whole genome shotgun sequence
Erwinia_amylovora_Ea116_5_29	GCA_012367575.1	NZ_CP030267.1 Klebsiella pneumoniae subsp. pneumoniae strain SC-7 plasmid pSC7-KPC, complete sequence
Erwinia_amylovora_Ea116_5_29	GCA_012367575.1	IMGVR_UViG_3300031420_000044
Erwinia_amylovora_Ea116_5_29	GCA_012367575.1	NZ_CP030267.1 Klebsiella pneumoniae subsp. pneumoniae strain SC-7 plasmid pSC7-KPC, complete sequence
Erwinia_amylovora_Ea116_5_29	GCA_012367575.1	FQ482085.1 Erwinia tasmaniensis phage phiEt88 complete genome
Erwinia_amylovora_Ea116_5_29	GCA_012367575.1	CU468130.1 Erwinia tasmaniensis strain ET1/99 complete plasmid pET35
Erwinia_amylovora_Ea116_5_29	GCA_012367575.1	KJ685892.1 Salmonella enterica subsp. enterica serovar Hadar strain 139.67 plasmid KVHS-004 plasmid mediated quinolone resistance protein (qnrD1) and regulator protein (rop) genes, complete cds
Erwinia_amylovora_Ea116_5_29	GCA_012367575.1	NZ_CP030267.1 Klebsiella pneumoniae subsp. pneumoniae strain SC-7 plasmid pSC7-KPC, complete sequence
Erwinia_amylovora_Ea116_5_29	GCA_012367575.1	CU468130.1 Erwinia tasmaniensis strain ET1/99 complete plasmid pET35
Erwinia_amylovora_Ea116_5_29	GCA_012367575.1	NZ_JAAEWB010000012.1 Erwinia amylovora strain Ea12 plasmid pEU30, whole genome shotgun sequence
Erwinia_amylovora_Ea116_5_29	GCA_012367575.1	NC_011148.1 Salmonella enterica subsp. enterica serovar Agona str. SL483 plasmid unnamed, complete sequence
Erwinia_amylovora_Ea02_03	GCA_012367585.1	FQ482085.1 Erwinia tasmaniensis phage phiEt88 complete genome
Erwinia_amylovora_Ea02_03	GCA_012367585.1	IMGVR_UViG_651324086_000002
Erwinia_amylovora_Ea02_03	GCA_012367585.1	CU468130.1 Erwinia tasmaniensis strain ET1/99 complete plasmid pET35
Erwinia_amylovora_Ea02_03	GCA_012367585.1	CU468130.1 Erwinia tasmaniensis strain ET1/99 complete plasmid pET35
Erwinia_amylovora_Ea02_03	GCA_012367585.1	CU468130.1 Erwinia tasmaniensis strain ET1/99 complete plasmid pET35
Erwinia_amylovora_Ea02_03	GCA_012367585.1	CU468130.1 Erwinia tasmaniensis strain ET1/99 complete plasmid pET35
Erwinia_amylovora_Ea02_03	GCA_012367585.1	NZ_JAAEWB010000012.1 Erwinia amylovora strain Ea12 plasmid pEU30, whole genome shotgun sequence
Erwinia_amylovora_Ea02_03	GCA_012367585.1	NZ_JACWHM010000027.1 Klebsiella pneumoniae strain BA9984 map unlocalized plasmid pIncN2 27, whole genome shotgun sequence
Erwinia_amylovora_Ea02_03	GCA_012367585.1	CU468130.1 Erwinia tasmaniensis strain ET1/99 complete plasmid pET35
Erwinia_amylovora_Ea02_03	GCA_012367585.1	CU468130.1 Erwinia tasmaniensis strain ET1/99 complete plasmid pET35
Erwinia_amylovora_Ea03_03	GCA_012367595.1	CU468130.1 Erwinia tasmaniensis strain ET1/99 complete plasmid pET35
Erwinia_amylovora_Ea03_03	GCA_012367595.1	CU468130.1 Erwinia tasmaniensis strain ET1/99 complete plasmid pET35
Erwinia_amylovora_Ea03_03	GCA_012367595.1	CU468130.1 Erwinia tasmaniensis strain ET1/99 complete plasmid pET35
Erwinia_amylovora_Ea03_03	GCA_012367595.1	CU468130.1 Erwinia tasmaniensis strain ET1/99 complete plasmid pET35
Erwinia_amylovora_Ea03_03	GCA_012367595.1	IMGVR_UViG_651324086_000002
Erwinia_amylovora_Ea03_03	GCA_012367595.1	FQ482085.1 Erwinia tasmaniensis phage phiEt88 complete genome
Erwinia_amylovora_Ea03_03	GCA_012367595.1	CU468130.1 Erwinia tasmaniensis strain ET1/99 complete plasmid pET35
Erwinia_amylovora_Ea03_03	GCA_012367595.1	CU468130.1 Erwinia tasmaniensis strain ET1/99 complete plasmid pET35
Erwinia_amylovora_Ea03_03	GCA_012367595.1	NZ_JAAEWB010000012.1 Erwinia amylovora strain Ea12 plasmid pEU30, whole genome shotgun sequence
Erwinia_amylovora_Ea03_03	GCA_012367595.1	NZ_JACWHM010000027.1 Klebsiella pneumoniae strain BA9984 map unlocalized plasmid pIncN2 27, whole genome shotgun sequence
Erwinia_amylovora_E2006P	GCA_012367615.1	NZ_CP030267.1 Klebsiella pneumoniae subsp. pneumoniae strain SC-7 plasmid pSC7-KPC, complete sequence
Erwinia_amylovora_E2006P	GCA_012367615.1	CU468130.1 Erwinia tasmaniensis strain ET1/99 complete plasmid pET35
Erwinia_amylovora_E2006P	GCA_012367615.1	NC_011148.1 Salmonella enterica subsp. enterica serovar Agona str. SL483 plasmid unnamed, complete sequence
Erwinia_amylovora_E2006P	GCA_012367615.1	NZ_JAAEWB010000012.1 Erwinia amylovora strain Ea12 plasmid pEU30, whole genome shotgun sequence
Erwinia_amylovora_E2006P	GCA_012367615.1	NZ_JAAEWB010000012.1 Erwinia amylovora strain Ea12 plasmid pEU30, whole genome shotgun sequence
Erwinia_amylovora_E2006P	GCA_012367615.1	NZ_JAAEWH010000068.1 Erwinia amylovora strain Ea01-03 plasmid pEA4.0, whole genome shotgun sequence
Erwinia_amylovora_E2006P	GCA_012367615.1	NZ_CP030267.1 Klebsiella pneumoniae subsp. pneumoniae strain SC-7 plasmid pSC7-KPC, complete sequence
Erwinia_amylovora_Ea01_03	GCA_012367655.1	CU468130.1 Erwinia tasmaniensis strain ET1/99 complete plasmid pET35
Erwinia_amylovora_Ea01_03	GCA_012367655.1	NZ_JAAEWB010000012.1 Erwinia amylovora strain Ea12 plasmid pEU30, whole genome shotgun sequence
Erwinia_amylovora_Ea01_03	GCA_012367655.1	NZ_JAAEWR010000012.1 Erwinia amylovora strain 39-I-II plasmid pEA72, whole genome shotgun sequence
Erwinia_amylovora_Ea01_03	GCA_012367655.1	NZ_JAAEWR010000012.1 Erwinia amylovora strain 39-I-II plasmid pEA72, whole genome shotgun sequence
Erwinia_amylovora_Ea01_03	GCA_012367655.1	NZ_JAAEWB010000012.1 Erwinia amylovora strain Ea12 plasmid pEU30, whole genome shotgun sequence
Erwinia_amylovora_Ea01_03	GCA_012367655.1	FQ482085.1 Erwinia tasmaniensis phage phiEt88 complete genome
Erwinia_amylovora_Ea01_03	GCA_012367655.1	NZ_CP030267.1 Klebsiella pneumoniae subsp. pneumoniae strain SC-7 plasmid pSC7-KPC, complete sequence
Erwinia_amylovora_Ea01_03	GCA_012367655.1	NZ_CP030267.1 Klebsiella pneumoniae subsp. pneumoniae strain SC-7 plasmid pSC7-KPC, complete sequence
Erwinia_amylovora_Ea01_03	GCA_012367655.1	CU468130.1 Erwinia tasmaniensis strain ET1/99 complete plasmid pET35
Erwinia_amylovora_Ea01_03	GCA_012367655.1	CM000957.1 Candidatus Regiella insecticola LSR1 plasmid pRILSR1, whole genome shotgun sequence
Erwinia_amylovora_Ea01_03	GCA_012367655.1	IMGVR_UViG_3300031418_000253
Erwinia_amylovora_Ea01_03	GCA_012367655.1	IMGVR_UViG_3300009036_000147
Erwinia_amylovora_CFBP_7131	GCA_012367675.1	CU468130.1 Erwinia tasmaniensis strain ET1/99 complete plasmid pET35
Erwinia_amylovora_CFBP_7131	GCA_012367675.1	NZ_CP030267.1 Klebsiella pneumoniae subsp. pneumoniae strain SC-7 plasmid pSC7-KPC, complete sequence
Erwinia_amylovora_CFBP_7131	GCA_012367675.1	KJ685892.1 Salmonella enterica subsp. enterica serovar Hadar strain 139.67 plasmid KVHS-004 plasmid mediated quinolone resistance protein (qnrD1) and regulator protein (rop) genes, complete cds
Erwinia_amylovora_CFBP_7131	GCA_012367675.1	FQ482085.1 Erwinia tasmaniensis phage phiEt88 complete genome
Erwinia_amylovora_CFBP_7131	GCA_012367675.1	NZ_JAAEWB010000012.1 Erwinia amylovora strain Ea12 plasmid pEU30, whole genome shotgun sequence
Erwinia_amylovora_CFBP_7131	GCA_012367675.1	CU468130.1 Erwinia tasmaniensis strain ET1/99 complete plasmid pET35
Erwinia_amylovora_CFBP_7131	GCA_012367675.1	BK049330.1 TPA_asm: Myoviridae sp. isolate ct8vj1, partial genome
Erwinia_amylovora_CFBP_7131	GCA_012367675.1	NC_011148.1 Salmonella enterica subsp. enterica serovar Agona str. SL483 plasmid unnamed, complete sequence
Erwinia_amylovora_CFBP_7131	GCA_012367675.1	NZ_CP030267.1 Klebsiella pneumoniae subsp. pneumoniae strain SC-7 plasmid pSC7-KPC, complete sequence
Erwinia_amylovora_CFBP_7131	GCA_012367675.1	NZ_JAAEWR010000012.1 Erwinia amylovora strain 39-I-II plasmid pEA72, whole genome shotgun sequence
Erwinia_amylovora_CFBP_7131	GCA_012367675.1	NZ_JAAEWH010000049.1 Erwinia amylovora strain Ea01-03 plasmid pEU30, whole genome shotgun sequence
Erwinia_amylovora_CFBP_7131	GCA_012367675.1	IMGVR_UViG_3300031420_000044
Erwinia_amylovora_CFBP_7131	GCA_012367675.1	NZ_CP028352.1 Pantoea vagans strain PV989 plasmid pPV989-94, complete sequence
Erwinia_amylovora_CFBP_7131	GCA_012367675.1	NZ_JAAEWH010000068.1 Erwinia amylovora strain Ea01-03 plasmid pEA4.0, whole genome shotgun sequence
Erwinia_amylovora_CFBP_7131	GCA_012367675.1	NZ_CP030267.1 Klebsiella pneumoniae subsp. pneumoniae strain SC-7 plasmid pSC7-KPC, complete sequence
Erwinia_amylovora_CFBP_7131	GCA_012367675.1	NC_005814.1 Yersinia pestis biovar Microtus str. 91001 plasmid pCRY, complete sequence
Erwinia_amylovora_CFBP_2313	GCA_012367685.1	NZ_JAAEWB010000012.1 Erwinia amylovora strain Ea12 plasmid pEU30, whole genome shotgun sequence
Erwinia_amylovora_CFBP_2313	GCA_012367685.1	IMGVR_UViG_3300031420_000044
Erwinia_amylovora_CFBP_2313	GCA_012367685.1	FQ482085.1 Erwinia tasmaniensis phage phiEt88 complete genome
Erwinia_amylovora_CFBP_2313	GCA_012367685.1	CU468130.1 Erwinia tasmaniensis strain ET1/99 complete plasmid pET35
Erwinia_amylovora_CFBP_2313	GCA_012367685.1	CU468130.1 Erwinia tasmaniensis strain ET1/99 complete plasmid pET35
Erwinia_amylovora_CFBP_2313	GCA_012367685.1	NZ_CP028352.1 Pantoea vagans strain PV989 plasmid pPV989-94, complete sequence
Erwinia_amylovora_CFBP_2313	GCA_012367685.1	NZ_CP030267.1 Klebsiella pneumoniae subsp. pneumoniae strain SC-7 plasmid pSC7-KPC, complete sequence
Erwinia_amylovora_CFBP_2313	GCA_012367685.1	NZ_CP030267.1 Klebsiella pneumoniae subsp. pneumoniae strain SC-7 plasmid pSC7-KPC, complete sequence
Erwinia_amylovora_CFBP_2313	GCA_012367685.1	NZ_JAAEWH010000049.1 Erwinia amylovora strain Ea01-03 plasmid pEU30, whole genome shotgun sequence
Erwinia_amylovora_CFBP_2313	GCA_012367685.1	NZ_JAAEWH010000068.1 Erwinia amylovora strain Ea01-03 plasmid pEA4.0, whole genome shotgun sequence
Erwinia_amylovora_CFBP_2313	GCA_012367685.1	NZ_CP030267.1 Klebsiella pneumoniae subsp. pneumoniae strain SC-7 plasmid pSC7-KPC, complete sequence
Erwinia_amylovora_CFBP_2313	GCA_012367685.1	NC_011148.1 Salmonella enterica subsp. enterica serovar Agona str. SL483 plasmid unnamed, complete sequence
Erwinia_amylovora_CFBP_7130	GCA_012367695.1	BK049330.1 TPA_asm: Myoviridae sp. isolate ct8vj1, partial genome
Erwinia_amylovora_CFBP_7130	GCA_012367695.1	KJ685892.1 Salmonella enterica subsp. enterica serovar Hadar strain 139.67 plasmid KVHS-004 plasmid mediated quinolone resistance protein (qnrD1) and regulator protein (rop) genes, complete cds
Erwinia_amylovora_CFBP_7130	GCA_012367695.1	NZ_CP030267.1 Klebsiella pneumoniae subsp. pneumoniae strain SC-7 plasmid pSC7-KPC, complete sequence
Erwinia_amylovora_CFBP_7130	GCA_012367695.1	NC_005814.1 Yersinia pestis biovar Microtus str. 91001 plasmid pCRY, complete sequence
Erwinia_amylovora_CFBP_7130	GCA_012367695.1	NZ_JAAEWH010000068.1 Erwinia amylovora strain Ea01-03 plasmid pEA4.0, whole genome shotgun sequence
Erwinia_amylovora_CFBP_7130	GCA_012367695.1	NC_011148.1 Salmonella enterica subsp. enterica serovar Agona str. SL483 plasmid unnamed, complete sequence
Erwinia_amylovora_CFBP_7130	GCA_012367695.1	NZ_JAAEWB010000012.1 Erwinia amylovora strain Ea12 plasmid pEU30, whole genome shotgun sequence
Erwinia_amylovora_CFBP_7130	GCA_012367695.1	NZ_CP028352.1 Pantoea vagans strain PV989 plasmid pPV989-94, complete sequence
Erwinia_amylovora_CFBP_7130	GCA_012367695.1	CU468130.1 Erwinia tasmaniensis strain ET1/99 complete plasmid pET35
Erwinia_amylovora_CFBP_7130	GCA_012367695.1	IMGVR_UViG_3300031420_000044
Erwinia_amylovora_CFBP_7130	GCA_012367695.1	CU468130.1 Erwinia tasmaniensis strain ET1/99 complete plasmid pET35
Erwinia_amylovora_CFBP_7130	GCA_012367695.1	FQ482085.1 Erwinia tasmaniensis phage phiEt88 complete genome
Erwinia_amylovora_CFBP_7130	GCA_012367695.1	NZ_JAAEWR010000012.1 Erwinia amylovora strain 39-I-II plasmid pEA72, whole genome shotgun sequence
Erwinia_amylovora_CFBP_7130	GCA_012367695.1	NZ_CP030267.1 Klebsiella pneumoniae subsp. pneumoniae strain SC-7 plasmid pSC7-KPC, complete sequence
Erwinia_amylovora_CFBP_7130	GCA_012367695.1	NZ_CP030267.1 Klebsiella pneumoniae subsp. pneumoniae strain SC-7 plasmid pSC7-KPC, complete sequence
Erwinia_amylovora_CFBP_7130	GCA_012367695.1	CU468130.1 Erwinia tasmaniensis strain ET1/99 complete plasmid pET35
Erwinia_amylovora_CFBP_7130	GCA_012367695.1	NZ_JAAEWH010000049.1 Erwinia amylovora strain Ea01-03 plasmid pEU30, whole genome shotgun sequence
Erwinia_amylovora_CFBP_1995	GCA_012367705.1	BK049330.1 TPA_asm: Myoviridae sp. isolate ct8vj1, partial genome
Erwinia_amylovora_CFBP_1995	GCA_012367705.1	CU468130.1 Erwinia tasmaniensis strain ET1/99 complete plasmid pET35
Erwinia_amylovora_CFBP_1995	GCA_012367705.1	NZ_CP030267.1 Klebsiella pneumoniae subsp. pneumoniae strain SC-7 plasmid pSC7-KPC, complete sequence
Erwinia_amylovora_CFBP_1995	GCA_012367705.1	NC_005814.1 Yersinia pestis biovar Microtus str. 91001 plasmid pCRY, complete sequence
Erwinia_amylovora_CFBP_1995	GCA_012367705.1	NZ_CP030267.1 Klebsiella pneumoniae subsp. pneumoniae strain SC-7 plasmid pSC7-KPC, complete sequence
Erwinia_amylovora_CFBP_1995	GCA_012367705.1	KJ685892.1 Salmonella enterica subsp. enterica serovar Hadar strain 139.67 plasmid KVHS-004 plasmid mediated quinolone resistance protein (qnrD1) and regulator protein (rop) genes, complete cds
Erwinia_amylovora_CFBP_1995	GCA_012367705.1	IMGVR_UViG_3300031420_000044
Erwinia_amylovora_CFBP_1995	GCA_012367705.1	NZ_CP030267.1 Klebsiella pneumoniae subsp. pneumoniae strain SC-7 plasmid pSC7-KPC, complete sequence
Erwinia_amylovora_CFBP_1995	GCA_012367705.1	FQ482085.1 Erwinia tasmaniensis phage phiEt88 complete genome
Erwinia_amylovora_CFBP_1995	GCA_012367705.1	CU468130.1 Erwinia tasmaniensis strain ET1/99 complete plasmid pET35
Erwinia_amylovora_CFBP_1995	GCA_012367705.1	NC_011148.1 Salmonella enterica subsp. enterica serovar Agona str. SL483 plasmid unnamed, complete sequence
Erwinia_amylovora_CFBP_1995	GCA_012367705.1	NZ_JAAEWB010000012.1 Erwinia amylovora strain Ea12 plasmid pEU30, whole genome shotgun sequence
Erwinia_amylovora_CFBP_1995	GCA_012367705.1	NZ_JAAEWR010000012.1 Erwinia amylovora strain 39-I-II plasmid pEA72, whole genome shotgun sequence
Erwinia_amylovora_CFBP_1995	GCA_012367705.1	NZ_JAAEWH010000068.1 Erwinia amylovora strain Ea01-03 plasmid pEA4.0, whole genome shotgun sequence
Erwinia_amylovora_CFBP_1995	GCA_012367705.1	NZ_JAAEWH010000049.1 Erwinia amylovora strain Ea01-03 plasmid pEU30, whole genome shotgun sequence
Erwinia_amylovora_CFBP_1995	GCA_012367705.1	CU468130.1 Erwinia tasmaniensis strain ET1/99 complete plasmid pET35
Erwinia_amylovora_CFBP_1995	GCA_012367705.1	NZ_CP028352.1 Pantoea vagans strain PV989 plasmid pPV989-94, complete sequence
Erwinia_amylovora_BCEa23A	GCA_012367755.1	NZ_JAAEWH010000049.1 Erwinia amylovora strain Ea01-03 plasmid pEU30, whole genome shotgun sequence
Erwinia_amylovora_BCEa23A	GCA_012367755.1	NZ_JAAEWB010000012.1 Erwinia amylovora strain Ea12 plasmid pEU30, whole genome shotgun sequence
Erwinia_amylovora_BCEa23A	GCA_012367755.1	NZ_JAAEWR010000012.1 Erwinia amylovora strain 39-I-II plasmid pEA72, whole genome shotgun sequence
Erwinia_amylovora_BCEa23A	GCA_012367755.1	NZ_JAAEWB010000012.1 Erwinia amylovora strain Ea12 plasmid pEU30, whole genome shotgun sequence
Erwinia_amylovora_BCEa23A	GCA_012367755.1	BK049330.1 TPA_asm: Myoviridae sp. isolate ct8vj1, partial genome
Erwinia_amylovora_BCEa23A	GCA_012367755.1	NZ_CP030267.1 Klebsiella pneumoniae subsp. pneumoniae strain SC-7 plasmid pSC7-KPC, complete sequence
Erwinia_amylovora_BCEa23A	GCA_012367755.1	CU468130.1 Erwinia tasmaniensis strain ET1/99 complete plasmid pET35
Erwinia_amylovora_BCEa23A	GCA_012367755.1	NZ_JAAEWB010000012.1 Erwinia amylovora strain Ea12 plasmid pEU30, whole genome shotgun sequence
Erwinia_amylovora_BCEa23A	GCA_012367755.1	NZ_JAAEWB010000012.1 Erwinia amylovora strain Ea12 plasmid pEU30, whole genome shotgun sequence
Erwinia_amylovora_BCEa23A	GCA_012367755.1	NZ_CP028352.1 Pantoea vagans strain PV989 plasmid pPV989-94, complete sequence
Erwinia_amylovora_BCEa23A	GCA_012367755.1	NZ_JAAEWB010000012.1 Erwinia amylovora strain Ea12 plasmid pEU30, whole genome shotgun sequence
Erwinia_amylovora_BCEa23A	GCA_012367755.1	NZ_CP030267.1 Klebsiella pneumoniae subsp. pneumoniae strain SC-7 plasmid pSC7-KPC, complete sequence
Erwinia_amylovora_BCEa23A	GCA_012367755.1	NC_005814.1 Yersinia pestis biovar Microtus str. 91001 plasmid pCRY, complete sequence
Erwinia_amylovora_BCEa23A	GCA_012367755.1	NZ_JAAEWB010000012.1 Erwinia amylovora strain Ea12 plasmid pEU30, whole genome shotgun sequence
Erwinia_amylovora_BCEa23A	GCA_012367755.1	NZ_JAAEWB010000012.1 Erwinia amylovora strain Ea12 plasmid pEU30, whole genome shotgun sequence
Erwinia_amylovora_BCEa23A	GCA_012367755.1	NZ_JAAEWB010000012.1 Erwinia amylovora strain Ea12 plasmid pEU30, whole genome shotgun sequence
Erwinia_amylovora_BCEa23A	GCA_012367755.1	NZ_JAAEWB010000012.1 Erwinia amylovora strain Ea12 plasmid pEU30, whole genome shotgun sequence
Erwinia_amylovora_BCEa23A	GCA_012367755.1	NZ_JAAEWB010000012.1 Erwinia amylovora strain Ea12 plasmid pEU30, whole genome shotgun sequence
Erwinia_amylovora_BCEa23A	GCA_012367755.1	NZ_JAAEWB010000012.1 Erwinia amylovora strain Ea12 plasmid pEU30, whole genome shotgun sequence
Erwinia_amylovora_BCEa23A	GCA_012367755.1	NZ_JAAEWH010000068.1 Erwinia amylovora strain Ea01-03 plasmid pEA4.0, whole genome shotgun sequence
Erwinia_amylovora_BCEa23A	GCA_012367755.1	DTR_651038
Erwinia_amylovora_BCEa23A	GCA_012367755.1	NZ_RRGT01000084.1 Escherichia coli strain FWSEC0128 map unlocalized plasmid unnamed2 FWSEC0128_contig00036, whole genome shotgun sequence
Erwinia_amylovora_BCEa23A	GCA_012367755.1	NZ_JAAEWH010000049.1 Erwinia amylovora strain Ea01-03 plasmid pEU30, whole genome shotgun sequence
Erwinia_amylovora_BCEa23A	GCA_012367755.1	NZ_JAAEWB010000012.1 Erwinia amylovora strain Ea12 plasmid pEU30, whole genome shotgun sequence
Erwinia_amylovora_BCEa23A	GCA_012367755.1	AJJI01000025.1 Klebsiella pneumoniae subsp. pneumoniae DSM 30104 = JCM 1662 = NBRC 14940 strain DSM 30104 plasmid pKPt3 Contig00025, whole genome shotgun sequence
Erwinia_amylovora_BCEa23A	GCA_012367755.1	NZ_JAAEWB010000012.1 Erwinia amylovora strain Ea12 plasmid pEU30, whole genome shotgun sequence
Erwinia_amylovora_BCEa23A	GCA_012367755.1	NZ_JAAEWH010000049.1 Erwinia amylovora strain Ea01-03 plasmid pEU30, whole genome shotgun sequence
Erwinia_amylovora_BCEa23A	GCA_012367755.1	NZ_JAAEWB010000012.1 Erwinia amylovora strain Ea12 plasmid pEU30, whole genome shotgun sequence
Erwinia_amylovora_BCEa23A	GCA_012367755.1	NZ_JAAEWB010000012.1 Erwinia amylovora strain Ea12 plasmid pEU30, whole genome shotgun sequence
Erwinia_amylovora_BCEa23A	GCA_012367755.1	NZ_JAAEWH010000049.1 Erwinia amylovora strain Ea01-03 plasmid pEU30, whole genome shotgun sequence
Erwinia_amylovora_BCEa23A	GCA_012367755.1	NZ_JAAEWB010000012.1 Erwinia amylovora strain Ea12 plasmid pEU30, whole genome shotgun sequence
Erwinia_amylovora_BCEa23A	GCA_012367755.1	NZ_CP054046.1 Yersinia massiliensis strain 2011N-4075 plasmid unnamed1, complete sequence
Erwinia_amylovora_BCEa23A	GCA_012367755.1	NZ_JAAEWH010000049.1 Erwinia amylovora strain Ea01-03 plasmid pEU30, whole genome shotgun sequence
Erwinia_amylovora_BCEa23A	GCA_012367755.1	NZ_JAAEWH010000049.1 Erwinia amylovora strain Ea01-03 plasmid pEU30, whole genome shotgun sequence
Erwinia_amylovora_BCEa23A	GCA_012367755.1	NZ_CP030267.1 Klebsiella pneumoniae subsp. pneumoniae strain SC-7 plasmid pSC7-KPC, complete sequence
Erwinia_amylovora_BCEa23A	GCA_012367755.1	CU468130.1 Erwinia tasmaniensis strain ET1/99 complete plasmid pET35
Erwinia_amylovora_BCEa23A	GCA_012367755.1	IMGVR_UViG_3300030005_000023
Erwinia_amylovora_BCEa23A	GCA_012367755.1	KJ685892.1 Salmonella enterica subsp. enterica serovar Hadar strain 139.67 plasmid KVHS-004 plasmid mediated quinolone resistance protein (qnrD1) and regulator protein (rop) genes, complete cds
Erwinia_amylovora_BCEa23A	GCA_012367755.1	IMGVR_UViG_3300031420_000044
Erwinia_amylovora_BCEa23A	GCA_012367755.1	NZ_JAAEWB010000012.1 Erwinia amylovora strain Ea12 plasmid pEU30, whole genome shotgun sequence
Erwinia_amylovora_BCEa23A	GCA_012367755.1	CU468130.1 Erwinia tasmaniensis strain ET1/99 complete plasmid pET35
Erwinia_amylovora_BCEa23A	GCA_012367755.1	NZ_JAAEWB010000012.1 Erwinia amylovora strain Ea12 plasmid pEU30, whole genome shotgun sequence
Erwinia_amylovora_39_M1_II	GCA_012367775.1	NZ_JAAEWB010000012.1 Erwinia amylovora strain Ea12 plasmid pEU30, whole genome shotgun sequence
Erwinia_amylovora_39_M1_II	GCA_012367775.1	NZ_CP030267.1 Klebsiella pneumoniae subsp. pneumoniae strain SC-7 plasmid pSC7-KPC, complete sequence
Erwinia_amylovora_39_M1_II	GCA_012367775.1	KJ685892.1 Salmonella enterica subsp. enterica serovar Hadar strain 139.67 plasmid KVHS-004 plasmid mediated quinolone resistance protein (qnrD1) and regulator protein (rop) genes, complete cds
Erwinia_amylovora_39_M1_II	GCA_012367775.1	NC_005814.1 Yersinia pestis biovar Microtus str. 91001 plasmid pCRY, complete sequence
Erwinia_amylovora_39_M1_II	GCA_012367775.1	NZ_JAAEWR010000012.1 Erwinia amylovora strain 39-I-II plasmid pEA72, whole genome shotgun sequence
Erwinia_amylovora_39_M1_II	GCA_012367775.1	NZ_JAAEWH010000068.1 Erwinia amylovora strain Ea01-03 plasmid pEA4.0, whole genome shotgun sequence
Erwinia_amylovora_39_M1_II	GCA_012367775.1	NZ_CP030267.1 Klebsiella pneumoniae subsp. pneumoniae strain SC-7 plasmid pSC7-KPC, complete sequence
Erwinia_amylovora_39_M1_II	GCA_012367775.1	BK049330.1 TPA_asm: Myoviridae sp. isolate ct8vj1, partial genome
Erwinia_amylovora_39_M1_II	GCA_012367775.1	CU468130.1 Erwinia tasmaniensis strain ET1/99 complete plasmid pET35
Erwinia_amylovora_39_M1_II	GCA_012367775.1	FQ482085.1 Erwinia tasmaniensis phage phiEt88 complete genome
Erwinia_amylovora_39_M1_II	GCA_012367775.1	NZ_CP030267.1 Klebsiella pneumoniae subsp. pneumoniae strain SC-7 plasmid pSC7-KPC, complete sequence
Erwinia_amylovora_39_M1_II	GCA_012367775.1	CU468130.1 Erwinia tasmaniensis strain ET1/99 complete plasmid pET35
Erwinia_amylovora_39_M1_II	GCA_012367775.1	NC_011148.1 Salmonella enterica subsp. enterica serovar Agona str. SL483 plasmid unnamed, complete sequence
Erwinia_amylovora_39_M1_II	GCA_012367775.1	NZ_JAAEWH010000049.1 Erwinia amylovora strain Ea01-03 plasmid pEU30, whole genome shotgun sequence
Erwinia_amylovora_39_M1_II	GCA_012367775.1	IMGVR_UViG_3300031420_000044
Erwinia_amylovora_39_M1_II	GCA_012367775.1	NZ_CP028352.1 Pantoea vagans strain PV989 plasmid pPV989-94, complete sequence
Erwinia_amylovora_39_M1_II	GCA_012367775.1	CU468130.1 Erwinia tasmaniensis strain ET1/99 complete plasmid pET35
Erwinia_amylovora_241_07	GCA_012367795.1	NC_005814.1 Yersinia pestis biovar Microtus str. 91001 plasmid pCRY, complete sequence
Erwinia_amylovora_241_07	GCA_012367795.1	NZ_JAAEWB010000012.1 Erwinia amylovora strain Ea12 plasmid pEU30, whole genome shotgun sequence
Erwinia_amylovora_241_07	GCA_012367795.1	FQ482085.1 Erwinia tasmaniensis phage phiEt88 complete genome
Erwinia_amylovora_241_07	GCA_012367795.1	NZ_JAAEWH010000068.1 Erwinia amylovora strain Ea01-03 plasmid pEA4.0, whole genome shotgun sequence
Erwinia_amylovora_241_07	GCA_012367795.1	IMGVR_UViG_3300031420_000044
Erwinia_amylovora_241_07	GCA_012367795.1	NZ_CP030267.1 Klebsiella pneumoniae subsp. pneumoniae strain SC-7 plasmid pSC7-KPC, complete sequence
Erwinia_amylovora_241_07	GCA_012367795.1	NZ_JAAEWR010000012.1 Erwinia amylovora strain 39-I-II plasmid pEA72, whole genome shotgun sequence
Erwinia_amylovora_241_07	GCA_012367795.1	KJ685892.1 Salmonella enterica subsp. enterica serovar Hadar strain 139.67 plasmid KVHS-004 plasmid mediated quinolone resistance protein (qnrD1) and regulator protein (rop) genes, complete cds
Erwinia_amylovora_241_07	GCA_012367795.1	NZ_CP030267.1 Klebsiella pneumoniae subsp. pneumoniae strain SC-7 plasmid pSC7-KPC, complete sequence
Erwinia_amylovora_241_07	GCA_012367795.1	NZ_JAAEWH010000049.1 Erwinia amylovora strain Ea01-03 plasmid pEU30, whole genome shotgun sequence
Erwinia_amylovora_241_07	GCA_012367795.1	BK049330.1 TPA_asm: Myoviridae sp. isolate ct8vj1, partial genome
Erwinia_amylovora_241_07	GCA_012367795.1	NZ_CP030267.1 Klebsiella pneumoniae subsp. pneumoniae strain SC-7 plasmid pSC7-KPC, complete sequence
Erwinia_amylovora_241_07	GCA_012367795.1	NZ_CP028352.1 Pantoea vagans strain PV989 plasmid pPV989-94, complete sequence
Erwinia_amylovora_241_07	GCA_012367795.1	CU468130.1 Erwinia tasmaniensis strain ET1/99 complete plasmid pET35
Erwinia_amylovora_241_07	GCA_012367795.1	NC_011148.1 Salmonella enterica subsp. enterica serovar Agona str. SL483 plasmid unnamed, complete sequence
Erwinia_amylovora_241_07	GCA_012367795.1	CU468130.1 Erwinia tasmaniensis strain ET1/99 complete plasmid pET35
Erwinia_amylovora_3477_1	GCA_012367805.1	NZ_JAAEWR010000012.1 Erwinia amylovora strain 39-I-II plasmid pEA72, whole genome shotgun sequence
Erwinia_amylovora_3477_1	GCA_012367805.1	NZ_JAAEWH010000068.1 Erwinia amylovora strain Ea01-03 plasmid pEA4.0, whole genome shotgun sequence
Erwinia_amylovora_3477_1	GCA_012367805.1	NZ_JAAEWH010000049.1 Erwinia amylovora strain Ea01-03 plasmid pEU30, whole genome shotgun sequence
Erwinia_amylovora_3477_1	GCA_012367805.1	NZ_CP030267.1 Klebsiella pneumoniae subsp. pneumoniae strain SC-7 plasmid pSC7-KPC, complete sequence
Erwinia_amylovora_3477_1	GCA_012367805.1	CU468130.1 Erwinia tasmaniensis strain ET1/99 complete plasmid pET35
Erwinia_amylovora_3477_1	GCA_012367805.1	NC_005814.1 Yersinia pestis biovar Microtus str. 91001 plasmid pCRY, complete sequence
Erwinia_amylovora_3477_1	GCA_012367805.1	BK049330.1 TPA_asm: Myoviridae sp. isolate ct8vj1, partial genome
Erwinia_amylovora_3477_1	GCA_012367805.1	NZ_CP028352.1 Pantoea vagans strain PV989 plasmid pPV989-94, complete sequence
Erwinia_amylovora_3477_1	GCA_012367805.1	NZ_CP030267.1 Klebsiella pneumoniae subsp. pneumoniae strain SC-7 plasmid pSC7-KPC, complete sequence
Erwinia_amylovora_3477_1	GCA_012367805.1	NC_011148.1 Salmonella enterica subsp. enterica serovar Agona str. SL483 plasmid unnamed, complete sequence
Erwinia_amylovora_3477_1	GCA_012367805.1	NZ_JAAEWB010000012.1 Erwinia amylovora strain Ea12 plasmid pEU30, whole genome shotgun sequence
Erwinia_amylovora_3477_1	GCA_012367805.1	KJ685892.1 Salmonella enterica subsp. enterica serovar Hadar strain 139.67 plasmid KVHS-004 plasmid mediated quinolone resistance protein (qnrD1) and regulator protein (rop) genes, complete cds
Erwinia_amylovora_3477_1	GCA_012367805.1	NZ_CP030267.1 Klebsiella pneumoniae subsp. pneumoniae strain SC-7 plasmid pSC7-KPC, complete sequence
Erwinia_amylovora_3477_1	GCA_012367805.1	CU468130.1 Erwinia tasmaniensis strain ET1/99 complete plasmid pET35
Erwinia_amylovora_3477_1	GCA_012367805.1	FQ482085.1 Erwinia tasmaniensis phage phiEt88 complete genome
Erwinia_amylovora_3477_1	GCA_012367805.1	IMGVR_UViG_3300031420_000044
Erwinia_amylovora_1611_BCEa29	GCA_012367815.1	IMGVR_UViG_3300030005_000023
Erwinia_amylovora_1611_BCEa29	GCA_012367815.1	NZ_JAAEWB010000012.1 Erwinia amylovora strain Ea12 plasmid pEU30, whole genome shotgun sequence
Erwinia_amylovora_1611_BCEa29	GCA_012367815.1	NZ_JAAEWB010000012.1 Erwinia amylovora strain Ea12 plasmid pEU30, whole genome shotgun sequence
Erwinia_amylovora_1611_BCEa29	GCA_012367815.1	NZ_CP030267.1 Klebsiella pneumoniae subsp. pneumoniae strain SC-7 plasmid pSC7-KPC, complete sequence
Erwinia_amylovora_1611_BCEa29	GCA_012367815.1	NZ_JAAEWH010000049.1 Erwinia amylovora strain Ea01-03 plasmid pEU30, whole genome shotgun sequence
Erwinia_amylovora_1611_BCEa29	GCA_012367815.1	NZ_JAAEWB010000012.1 Erwinia amylovora strain Ea12 plasmid pEU30, whole genome shotgun sequence
Erwinia_amylovora_1611_BCEa29	GCA_012367815.1	NZ_JAAEWB010000012.1 Erwinia amylovora strain Ea12 plasmid pEU30, whole genome shotgun sequence
Erwinia_amylovora_1611_BCEa29	GCA_012367815.1	CU468130.1 Erwinia tasmaniensis strain ET1/99 complete plasmid pET35
Erwinia_amylovora_1611_BCEa29	GCA_012367815.1	BK049330.1 TPA_asm: Myoviridae sp. isolate ct8vj1, partial genome
Erwinia_amylovora_1611_BCEa29	GCA_012367815.1	NZ_JAAEWB010000012.1 Erwinia amylovora strain Ea12 plasmid pEU30, whole genome shotgun sequence
Erwinia_amylovora_1611_BCEa29	GCA_012367815.1	NZ_JAAEWH010000049.1 Erwinia amylovora strain Ea01-03 plasmid pEU30, whole genome shotgun sequence
Erwinia_amylovora_1611_BCEa29	GCA_012367815.1	NZ_JAAEWB010000012.1 Erwinia amylovora strain Ea12 plasmid pEU30, whole genome shotgun sequence
Erwinia_amylovora_1611_BCEa29	GCA_012367815.1	NC_005814.1 Yersinia pestis biovar Microtus str. 91001 plasmid pCRY, complete sequence
Erwinia_amylovora_1611_BCEa29	GCA_012367815.1	NZ_CP028352.1 Pantoea vagans strain PV989 plasmid pPV989-94, complete sequence
Erwinia_amylovora_1611_BCEa29	GCA_012367815.1	NZ_JAAEWB010000012.1 Erwinia amylovora strain Ea12 plasmid pEU30, whole genome shotgun sequence
Erwinia_amylovora_1611_BCEa29	GCA_012367815.1	NZ_JAAEWB010000012.1 Erwinia amylovora strain Ea12 plasmid pEU30, whole genome shotgun sequence
Erwinia_amylovora_1611_BCEa29	GCA_012367815.1	KJ685892.1 Salmonella enterica subsp. enterica serovar Hadar strain 139.67 plasmid KVHS-004 plasmid mediated quinolone resistance protein (qnrD1) and regulator protein (rop) genes, complete cds
Erwinia_amylovora_1611_BCEa29	GCA_012367815.1	NZ_JAAEWH010000049.1 Erwinia amylovora strain Ea01-03 plasmid pEU30, whole genome shotgun sequence
Erwinia_amylovora_1611_BCEa29	GCA_012367815.1	CU468130.1 Erwinia tasmaniensis strain ET1/99 complete plasmid pET35
Erwinia_amylovora_1611_BCEa29	GCA_012367815.1	NZ_JAAEWB010000012.1 Erwinia amylovora strain Ea12 plasmid pEU30, whole genome shotgun sequence
Erwinia_amylovora_1611_BCEa29	GCA_012367815.1	NZ_JAAEWH010000049.1 Erwinia amylovora strain Ea01-03 plasmid pEU30, whole genome shotgun sequence
Erwinia_amylovora_1611_BCEa29	GCA_012367815.1	NZ_JAAEWB010000012.1 Erwinia amylovora strain Ea12 plasmid pEU30, whole genome shotgun sequence
Erwinia_amylovora_1611_BCEa29	GCA_012367815.1	NZ_JAAEWH010000049.1 Erwinia amylovora strain Ea01-03 plasmid pEU30, whole genome shotgun sequence
Erwinia_amylovora_1611_BCEa29	GCA_012367815.1	NZ_JAAEWR010000012.1 Erwinia amylovora strain 39-I-II plasmid pEA72, whole genome shotgun sequence
Erwinia_amylovora_1611_BCEa29	GCA_012367815.1	NZ_JAAEWH010000068.1 Erwinia amylovora strain Ea01-03 plasmid pEA4.0, whole genome shotgun sequence
Erwinia_amylovora_1611_BCEa29	GCA_012367815.1	NZ_JAAEWB010000012.1 Erwinia amylovora strain Ea12 plasmid pEU30, whole genome shotgun sequence
Erwinia_amylovora_1611_BCEa29	GCA_012367815.1	NZ_JAAEWB010000012.1 Erwinia amylovora strain Ea12 plasmid pEU30, whole genome shotgun sequence
Erwinia_amylovora_1611_BCEa29	GCA_012367815.1	NZ_JAAEWB010000012.1 Erwinia amylovora strain Ea12 plasmid pEU30, whole genome shotgun sequence
Erwinia_amylovora_1611_BCEa29	GCA_012367815.1	NZ_JAAEWH010000049.1 Erwinia amylovora strain Ea01-03 plasmid pEU30, whole genome shotgun sequence
Erwinia_amylovora_1611_BCEa29	GCA_012367815.1	NZ_RRGT01000084.1 Escherichia coli strain FWSEC0128 map unlocalized plasmid unnamed2 FWSEC0128_contig00036, whole genome shotgun sequence
Erwinia_amylovora_1611_BCEa29	GCA_012367815.1	IMGVR_UViG_3300031420_000044
Erwinia_amylovora_1611_BCEa29	GCA_012367815.1	NZ_JAAEWB010000012.1 Erwinia amylovora strain Ea12 plasmid pEU30, whole genome shotgun sequence
Erwinia_amylovora_1611_BCEa29	GCA_012367815.1	NZ_CP030267.1 Klebsiella pneumoniae subsp. pneumoniae strain SC-7 plasmid pSC7-KPC, complete sequence
Erwinia_amylovora_1611_BCEa29	GCA_012367815.1	AJJI01000025.1 Klebsiella pneumoniae subsp. pneumoniae DSM 30104 = JCM 1662 = NBRC 14940 strain DSM 30104 plasmid pKPt3 Contig00025, whole genome shotgun sequence
Erwinia_amylovora_214_07	GCA_012367845.1	NZ_CP028352.1 Pantoea vagans strain PV989 plasmid pPV989-94, complete sequence
Erwinia_amylovora_214_07	GCA_012367845.1	IMGVR_UViG_3300031420_000044
Erwinia_amylovora_214_07	GCA_012367845.1	NZ_CP030267.1 Klebsiella pneumoniae subsp. pneumoniae strain SC-7 plasmid pSC7-KPC, complete sequence
Erwinia_amylovora_214_07	GCA_012367845.1	NZ_JAAEWH010000049.1 Erwinia amylovora strain Ea01-03 plasmid pEU30, whole genome shotgun sequence
Erwinia_amylovora_214_07	GCA_012367845.1	CU468130.1 Erwinia tasmaniensis strain ET1/99 complete plasmid pET35
Erwinia_amylovora_214_07	GCA_012367845.1	CU468130.1 Erwinia tasmaniensis strain ET1/99 complete plasmid pET35
Erwinia_amylovora_214_07	GCA_012367845.1	KJ685892.1 Salmonella enterica subsp. enterica serovar Hadar strain 139.67 plasmid KVHS-004 plasmid mediated quinolone resistance protein (qnrD1) and regulator protein (rop) genes, complete cds
Erwinia_amylovora_214_07	GCA_012367845.1	BK049330.1 TPA_asm: Myoviridae sp. isolate ct8vj1, partial genome
Erwinia_amylovora_214_07	GCA_012367845.1	NZ_CP030267.1 Klebsiella pneumoniae subsp. pneumoniae strain SC-7 plasmid pSC7-KPC, complete sequence
Erwinia_amylovora_214_07	GCA_012367845.1	NC_005814.1 Yersinia pestis biovar Microtus str. 91001 plasmid pCRY, complete sequence
Erwinia_amylovora_214_07	GCA_012367845.1	NZ_JAAEWH010000068.1 Erwinia amylovora strain Ea01-03 plasmid pEA4.0, whole genome shotgun sequence
Erwinia_amylovora_214_07	GCA_012367845.1	CU468130.1 Erwinia tasmaniensis strain ET1/99 complete plasmid pET35
Erwinia_amylovora_214_07	GCA_012367845.1	NZ_JAAEWB010000012.1 Erwinia amylovora strain Ea12 plasmid pEU30, whole genome shotgun sequence
Erwinia_amylovora_214_07	GCA_012367845.1	NC_011148.1 Salmonella enterica subsp. enterica serovar Agona str. SL483 plasmid unnamed, complete sequence
Erwinia_amylovora_214_07	GCA_012367845.1	FQ482085.1 Erwinia tasmaniensis phage phiEt88 complete genome
Erwinia_amylovora_214_07	GCA_012367845.1	NZ_CP030267.1 Klebsiella pneumoniae subsp. pneumoniae strain SC-7 plasmid pSC7-KPC, complete sequence
Erwinia_amylovora_214_07	GCA_012367845.1	NZ_JAAEWR010000012.1 Erwinia amylovora strain 39-I-II plasmid pEA72, whole genome shotgun sequence
Erwinia_amylovora_1480_3	GCA_012367875.1	NZ_CP054046.1 Yersinia massiliensis strain 2011N-4075 plasmid unnamed1, complete sequence
Erwinia_amylovora_1480_3	GCA_012367875.1	NZ_JAAEWH010000049.1 Erwinia amylovora strain Ea01-03 plasmid pEU30, whole genome shotgun sequence
Erwinia_amylovora_1480_3	GCA_012367875.1	IMGVR_UViG_3300031420_000044
Erwinia_amylovora_1480_3	GCA_012367875.1	NZ_JAAEWB010000012.1 Erwinia amylovora strain Ea12 plasmid pEU30, whole genome shotgun sequence
Erwinia_amylovora_1480_3	GCA_012367875.1	NC_005814.1 Yersinia pestis biovar Microtus str. 91001 plasmid pCRY, complete sequence
Erwinia_amylovora_1480_3	GCA_012367875.1	NZ_JAAEWB010000012.1 Erwinia amylovora strain Ea12 plasmid pEU30, whole genome shotgun sequence
Erwinia_amylovora_1480_3	GCA_012367875.1	NZ_JAAEWH010000068.1 Erwinia amylovora strain Ea01-03 plasmid pEA4.0, whole genome shotgun sequence
Erwinia_amylovora_1480_3	GCA_012367875.1	NZ_JAAEWR010000012.1 Erwinia amylovora strain 39-I-II plasmid pEA72, whole genome shotgun sequence
Erwinia_amylovora_1480_3	GCA_012367875.1	NZ_JAAEWB010000012.1 Erwinia amylovora strain Ea12 plasmid pEU30, whole genome shotgun sequence
Erwinia_amylovora_1480_3	GCA_012367875.1	NZ_CP030267.1 Klebsiella pneumoniae subsp. pneumoniae strain SC-7 plasmid pSC7-KPC, complete sequence
Erwinia_amylovora_1480_3	GCA_012367875.1	NZ_JAAEWB010000012.1 Erwinia amylovora strain Ea12 plasmid pEU30, whole genome shotgun sequence
Erwinia_amylovora_1480_3	GCA_012367875.1	NZ_JAAEWH010000049.1 Erwinia amylovora strain Ea01-03 plasmid pEU30, whole genome shotgun sequence
Erwinia_amylovora_1480_3	GCA_012367875.1	NZ_JAAEWB010000012.1 Erwinia amylovora strain Ea12 plasmid pEU30, whole genome shotgun sequence
Erwinia_amylovora_1480_3	GCA_012367875.1	NZ_JAAEWB010000012.1 Erwinia amylovora strain Ea12 plasmid pEU30, whole genome shotgun sequence
Erwinia_amylovora_1480_3	GCA_012367875.1	NZ_JAAEWB010000012.1 Erwinia amylovora strain Ea12 plasmid pEU30, whole genome shotgun sequence
Erwinia_amylovora_1480_3	GCA_012367875.1	NZ_JAAEWH010000049.1 Erwinia amylovora strain Ea01-03 plasmid pEU30, whole genome shotgun sequence
Erwinia_amylovora_1480_3	GCA_012367875.1	NZ_JAAEWB010000012.1 Erwinia amylovora strain Ea12 plasmid pEU30, whole genome shotgun sequence
Erwinia_amylovora_1480_3	GCA_012367875.1	NZ_JAAEWB010000012.1 Erwinia amylovora strain Ea12 plasmid pEU30, whole genome shotgun sequence
Erwinia_amylovora_1480_3	GCA_012367875.1	NZ_JAAEWH010000049.1 Erwinia amylovora strain Ea01-03 plasmid pEU30, whole genome shotgun sequence
Erwinia_amylovora_1480_3	GCA_012367875.1	NZ_JAAEWB010000012.1 Erwinia amylovora strain Ea12 plasmid pEU30, whole genome shotgun sequence
Erwinia_amylovora_1480_3	GCA_012367875.1	NZ_JAAEWB010000012.1 Erwinia amylovora strain Ea12 plasmid pEU30, whole genome shotgun sequence
Erwinia_amylovora_1480_3	GCA_012367875.1	FQ482085.1 Erwinia tasmaniensis phage phiEt88 complete genome
Erwinia_amylovora_1480_3	GCA_012367875.1	NZ_JAAEWB010000012.1 Erwinia amylovora strain Ea12 plasmid pEU30, whole genome shotgun sequence
Erwinia_amylovora_1480_3	GCA_012367875.1	NZ_JAAEWB010000012.1 Erwinia amylovora strain Ea12 plasmid pEU30, whole genome shotgun sequence
Erwinia_amylovora_1480_3	GCA_012367875.1	NZ_JAAEWB010000012.1 Erwinia amylovora strain Ea12 plasmid pEU30, whole genome shotgun sequence
Erwinia_amylovora_1480_3	GCA_012367875.1	CU468130.1 Erwinia tasmaniensis strain ET1/99 complete plasmid pET35
Erwinia_amylovora_1480_3	GCA_012367875.1	NZ_JAAEWH010000049.1 Erwinia amylovora strain Ea01-03 plasmid pEU30, whole genome shotgun sequence
Erwinia_amylovora_1480_3	GCA_012367875.1	CU468130.1 Erwinia tasmaniensis strain ET1/99 complete plasmid pET35
Erwinia_amylovora_1480_3	GCA_012367875.1	BK049330.1 TPA_asm: Myoviridae sp. isolate ct8vj1, partial genome
Erwinia_amylovora_1480_3	GCA_012367875.1	NZ_JAAEWB010000012.1 Erwinia amylovora strain Ea12 plasmid pEU30, whole genome shotgun sequence
Erwinia_amylovora_1480_3	GCA_012367875.1	NZ_CP028352.1 Pantoea vagans strain PV989 plasmid pPV989-94, complete sequence
Erwinia_amylovora_1480_3	GCA_012367875.1	NZ_JAAEWB010000012.1 Erwinia amylovora strain Ea12 plasmid pEU30, whole genome shotgun sequence
Erwinia_amylovora_1480_3	GCA_012367875.1	NZ_JAAEWH010000049.1 Erwinia amylovora strain Ea01-03 plasmid pEU30, whole genome shotgun sequence
Erwinia_amylovora_1480_3	GCA_012367875.1	NZ_JAAEWB010000012.1 Erwinia amylovora strain Ea12 plasmid pEU30, whole genome shotgun sequence
Erwinia_amylovora_1477_1	GCA_012367885.1	NZ_JAAEWH010000068.1 Erwinia amylovora strain Ea01-03 plasmid pEA4.0, whole genome shotgun sequence
Erwinia_amylovora_1477_1	GCA_012367885.1	IMGVR_UViG_3300031420_000044
Erwinia_amylovora_1477_1	GCA_012367885.1	FQ482085.1 Erwinia tasmaniensis phage phiEt88 complete genome
Erwinia_amylovora_1477_1	GCA_012367885.1	NZ_CP030267.1 Klebsiella pneumoniae subsp. pneumoniae strain SC-7 plasmid pSC7-KPC, complete sequence
Erwinia_amylovora_1477_1	GCA_012367885.1	CU468130.1 Erwinia tasmaniensis strain ET1/99 complete plasmid pET35
Erwinia_amylovora_1477_1	GCA_012367885.1	KJ685892.1 Salmonella enterica subsp. enterica serovar Hadar strain 139.67 plasmid KVHS-004 plasmid mediated quinolone resistance protein (qnrD1) and regulator protein (rop) genes, complete cds
Erwinia_amylovora_1477_1	GCA_012367885.1	CU468130.1 Erwinia tasmaniensis strain ET1/99 complete plasmid pET35
Erwinia_amylovora_1477_1	GCA_012367885.1	NZ_JAAEWR010000012.1 Erwinia amylovora strain 39-I-II plasmid pEA72, whole genome shotgun sequence
Erwinia_amylovora_1477_1	GCA_012367885.1	NZ_CP030267.1 Klebsiella pneumoniae subsp. pneumoniae strain SC-7 plasmid pSC7-KPC, complete sequence
Erwinia_amylovora_1477_1	GCA_012367885.1	NZ_JAAEWB010000012.1 Erwinia amylovora strain Ea12 plasmid pEU30, whole genome shotgun sequence
Erwinia_amylovora_1477_1	GCA_012367885.1	NC_011148.1 Salmonella enterica subsp. enterica serovar Agona str. SL483 plasmid unnamed, complete sequence
Erwinia_amylovora_1477_1	GCA_012367885.1	NZ_JAAEWH010000049.1 Erwinia amylovora strain Ea01-03 plasmid pEU30, whole genome shotgun sequence
Erwinia_amylovora_1477_1	GCA_012367885.1	NZ_CP030267.1 Klebsiella pneumoniae subsp. pneumoniae strain SC-7 plasmid pSC7-KPC, complete sequence
Erwinia_amylovora_1477_1	GCA_012367885.1	CU468130.1 Erwinia tasmaniensis strain ET1/99 complete plasmid pET35
Erwinia_amylovora_1400_1	GCA_012367905.1	CU468130.1 Erwinia tasmaniensis strain ET1/99 complete plasmid pET35
Erwinia_amylovora_1400_1	GCA_012367905.1	NZ_CP030267.1 Klebsiella pneumoniae subsp. pneumoniae strain SC-7 plasmid pSC7-KPC, complete sequence
Erwinia_amylovora_1400_1	GCA_012367905.1	KJ685892.1 Salmonella enterica subsp. enterica serovar Hadar strain 139.67 plasmid KVHS-004 plasmid mediated quinolone resistance protein (qnrD1) and regulator protein (rop) genes, complete cds
Erwinia_amylovora_1400_1	GCA_012367905.1	NZ_JAAEWB010000012.1 Erwinia amylovora strain Ea12 plasmid pEU30, whole genome shotgun sequence
Erwinia_amylovora_1400_1	GCA_012367905.1	NZ_JAAEWR010000012.1 Erwinia amylovora strain 39-I-II plasmid pEA72, whole genome shotgun sequence
Erwinia_amylovora_1400_1	GCA_012367905.1	NC_011148.1 Salmonella enterica subsp. enterica serovar Agona str. SL483 plasmid unnamed, complete sequence
Erwinia_amylovora_1400_1	GCA_012367905.1	CU468130.1 Erwinia tasmaniensis strain ET1/99 complete plasmid pET35
Erwinia_amylovora_1400_1	GCA_012367905.1	NZ_CP030267.1 Klebsiella pneumoniae subsp. pneumoniae strain SC-7 plasmid pSC7-KPC, complete sequence
Erwinia_amylovora_1400_1	GCA_012367905.1	CU468130.1 Erwinia tasmaniensis strain ET1/99 complete plasmid pET35
Erwinia_amylovora_1400_1	GCA_012367905.1	IMGVR_UViG_3300031420_000044
[truncated: 1,779 more rows]
